# Supplementary material for: MEF2C Phosphorylation Is Required for Chemotherapy Resistance in Acute Myeloid Leukemia
Source: Oxford University Press journal article supplement (doi:10.1158/2159-8290.cd-17-1271), 2018-02-08
Supplement: 21598290cd171271-sup-192326_2_supp_4527690_p333cv.xlsx [file 21598290cd171271-sup-192326_2_supp_4527690_p333cv.xlsx]

## Sheet: Metadata
Data S2: Transcriptome and chromatin accessibility profiling.
Sheet 1	RNAseq_DEG_S222A+_S222A-	List of differentially expressed genes between S222A+ and S222A- cells by RNA sequencing
Sheet 2	OCIAML2_GSEA_report_down	Table of gene sets downregulated in S222A MEF2C compared to MEF2C in OCIAML2 cells by GSEA
Sheet 3	OCIAML2_GSEA_report_up	Table of gene sets upregulated in S222A MEF2C compared to MEF2C in OCIAML2 cells by GSEA
Sheet 4	ATACseq_RNAseq_withMotif	List of differentially regulated genes between S222A+ and S222A- cells identified in ATAC sequencing and RNA sequencing containing MEF2 motifs

## Sheet: RNAseq_DEG_S222A+_S222A-
Data S2, related to Figure 4: Transcriptome and chromatin accessibility profiling.
Gene	Base Mean	log2 fold change	pvalue	padj
NOG	188.292	3.1554	1.35258e-53	1.60132e-49
SMIM14	257.907	2.79128	1.34093e-45	7.93765e-42
BTG2	157.938	2.54168	5.42193e-43	1.60475e-39
HIST1H2AC	70.211	3.02764	4.63739e-43	1.60475e-39
CALCOCO2	610.115	1.47001	4.40725e-35	1.04355e-31
DUSP4	65.7909	2.3872	1.97347e-30	3.89399e-27
MS4A3	625.565	-1.7397	2.9785e-29	5.03749e-26
SPINK2	36.7875	2.79292	4.93602e-27	7.3047e-24
RGS1	106.939	2.83652	2.95035e-26	3.88103e-23
RPS6KA5	152.921	1.74773	1.05505e-24	1.24908e-21
EIF4ENIF1	125.315	1.75664	4.85046e-21	5.22042e-18
CD82	154.84	1.33461	7.77231e-21	7.19337e-18
MMP14	1141.22	1.32659	7.89879e-21	7.19337e-18
RUNX2	698.164	1.19168	1.13978e-20	9.63848e-18
TXNIP	638.241	1.69981	2.02543e-20	1.5986e-17
IFT57	194.694	-1.47774	3.39694e-20	2.51352e-17
INSIG1	1349.29	1.43514	5.13626e-20	3.57695e-17
BMP8B	279.41	-1.07311	1.13444e-19	7.46147e-17
TCTN1	34.4919	2.26351	1.86039e-19	1.15922e-16
AHNAK	388.05	1.23904	2.74449e-19	1.6246e-16
MARC1	338.726	-1.20927	3.47854e-19	1.96107e-16
CTSG	1182.98	-1.53172	8.09212e-19	4.35466e-16
ADAM28	39.8615	2.1803	2.50326e-18	1.28853e-15
CYP1B1	220.536	1.33431	2.76725e-18	1.36506e-15
ZFP36L1	128.666	1.87056	8.13811e-18	3.85388e-15
CD44	1129.07	0.790363	1.00233e-17	4.56409e-15
MNDA	328.101	-1.44106	4.19292e-17	1.8059e-14
PLXNC1	225.033	1.8736	4.27107e-17	1.8059e-14
MYO1B	25.893	2.36969	4.21248e-16	1.71971e-13
ABHD4	15.6627	2.40456	1.45389e-15	5.6624e-13
FAIM3	52.6915	1.77854	1.48268e-15	5.6624e-13
DTX4	62.7891	1.96188	7.7275e-15	2.85893e-12
ELMSAN1	248.638	1.07138	2.78782e-14	1.00015e-11
DUSP6	571.243	1.38598	5.0908e-14	1.77265e-11
AKNA	323.618	1.13055	6.01293e-14	2.03392e-11
CAPG	1072.74	1.55661	6.34962e-14	2.08814e-11
HTRA3	15.2278	2.31986	7.30516e-14	2.33745e-11
UBASH3B	66.7895	1.94268	9.35188e-14	2.9136e-11
SQLE	283.303	-1.09452	1.07267e-13	3.25623e-11
FNBP1	814.668	0.801592	1.10476e-13	3.26981e-11
LRMP	230.135	1.43714	2.96515e-13	8.56204e-11
VIM	1460.55	1.60702	4.24954e-13	1.19786e-10
CYTH4	556.892	1.20782	4.43026e-13	1.21977e-10
BIRC3	34.7374	1.84523	6.63591e-13	1.78551e-10
CD109	60.793	1.49857	7.60359e-13	2.00042e-10
BASP1	664.779	-0.912379	9.35855e-13	2.35736e-10
NME1	777.186	-0.801726	9.25684e-13	2.35736e-10
VLDLR	198.061	1.25999	1.06862e-12	2.6357e-10
DLL1	6.78029	2.22562	1.42675e-12	3.44719e-10
ARHGAP25	117.894	1.28559	1.81053e-12	4.24533e-10
RASD1	280.452	2.19943	1.8288e-12	4.24533e-10
RFTN1	122.75	1.20462	3.19754e-12	7.27994e-10
CLK1	149.683	1.06351	4.04216e-12	9.02928e-10
ATP10A	43.2187	1.7564	4.49019e-12	9.84433e-10
LPL	182.643	-1.21959	6.41503e-12	1.38086e-09
ADCY9	98.4516	1.50879	7.4511e-12	1.56489e-09
HIPK2	194.484	1.10668	7.53433e-12	1.56489e-09
EVL	285.121	0.911989	8.78719e-12	1.79365e-09
CD53	285.83	1.24418	9.34692e-12	1.87556e-09
ITGA6	20.6721	1.83478	1.14995e-11	2.26905e-09
NAPSB	75.4369	1.56775	1.64533e-11	3.19329e-09
CCT6A	1724.26	-0.560866	1.7956e-11	3.40052e-09
CXCR3	19.3428	2.12379	1.80955e-11	3.40052e-09
CD164	488.383	0.921512	6.09669e-11	1.12779e-08
PPP1R15A	108.664	1.14912	6.85838e-11	1.24917e-08
IGFBP7	556.317	1.05243	1.01924e-10	1.8283e-08
SRPK3	6.09062	2.04854	1.10017e-10	1.94402e-08
SRGN	12135.7	-0.957488	1.63152e-10	2.84052e-08
PDE7A	187.782	1.06004	2.22278e-10	3.81385e-08
FAM46A	548.838	-0.744313	2.46385e-10	4.16707e-08
PLD6	162.458	-1.00989	2.75871e-10	4.60005e-08
TRIM25	733.507	0.762016	2.83699e-10	4.66488e-08
C5orf56	22.2852	1.83587	3.63234e-10	5.89085e-08
DACT3	40.8057	1.81646	3.72428e-10	5.95834e-08
NLRP1	20.8277	1.73324	5.14316e-10	8.11864e-08
CDA	41.5425	-1.49667	5.52533e-10	8.57176e-08
RTN2	66.5634	1.22498	5.57501e-10	8.57176e-08
CMSS1	279.728	-0.848209	5.65417e-10	8.58201e-08
ANKRD28	423.496	1.1315	5.93972e-10	8.8141e-08
NFIL3	100.056	1.14299	5.95597e-10	8.8141e-08
SLC20A1	612.692	-0.768152	6.21705e-10	9.08687e-08
LMNA	70.624	1.16606	6.50532e-10	9.39225e-08
TIPARP	173.147	1.28602	6.90233e-10	9.84539e-08
HIC1	14.0128	1.86242	7.58356e-10	1.06883e-07
LOXL4	14.5286	1.84191	8.33537e-10	1.16097e-07
NCF1B	9.99289	1.96051	8.48808e-10	1.16849e-07
MVP	23.8147	1.63176	1.03828e-09	1.41289e-07
ARHGAP18	240.105	0.820027	1.27306e-09	1.71269e-07
P2RY2	71.848	-1.25573	1.38654e-09	1.8444e-07
HAL	92.369	-1.09007	1.52882e-09	2.01107e-07
MMRN1	522.697	0.901325	1.9372e-09	2.52028e-07
TOX	32.2611	1.39009	2.00522e-09	2.58041e-07
TGFBR2	47.2456	1.40491	2.28997e-09	2.88414e-07
ZMYND8	403.162	0.974862	2.28273e-09	2.88414e-07
SNORA12	129.869	1.27208	2.46566e-09	3.07274e-07
ITGB7	60.411	1.28305	3.01246e-09	3.71506e-07
NMUR1	15.3151	1.77158	3.16317e-09	3.8607e-07
DDX21	3480.6	-0.728697	3.36074e-09	4.05998e-07
NFATC2	284.616	0.74319	3.47203e-09	4.15205e-07
MPEG1	32.1953	1.56519	3.86095e-09	4.57097e-07
HLA-E	869.635	0.769571	4.26309e-09	4.9971e-07
CTSB	233.094	0.912278	4.46296e-09	5.18009e-07
HRC	72.7346	1.52447	4.60779e-09	5.29627e-07
SPNS3	152.949	-1.19688	4.8526e-09	5.52403e-07
SLC16A1	398.212	-0.778921	5.40996e-09	6.09986e-07
TRAC	48.6553	1.85112	8.11547e-09	9.06406e-07
SPIB	51.7299	1.51607	8.47419e-09	9.37626e-07
CSPG4	82.9273	1.56269	9.16798e-09	1.005e-06
NCOA3	232.249	1.41547	9.60138e-09	1.04285e-06
SCPEP1	280.281	1.41347	1.07407e-08	1.15599e-06
CREBRF	158.293	1.48931	1.38076e-08	1.45953e-06
HDAC9	143.826	0.903619	1.37192e-08	1.45953e-06
BCL3	61.2177	1.55017	1.40737e-08	1.4745e-06
SIPA1L2	26.121	1.59104	1.47473e-08	1.53152e-06
THSD4	25.195	1.67381	1.62702e-08	1.67498e-06
ADAM10	513.662	0.828896	1.67143e-08	1.70587e-06
MCM7	1035.48	-0.53477	1.7582e-08	1.77909e-06
PYGM	6.26701	1.79889	1.77566e-08	1.78153e-06
NXF3	237.594	-1.09032	1.82147e-08	1.81214e-06
ADAMTS6	28.4899	1.60745	2.04034e-08	2.01297e-06
IL24	21.1657	1.57607	2.39714e-08	2.34543e-06
S100P	333.981	-0.963095	3.35718e-08	3.25784e-06
FADS1	281.294	-1.14329	3.42098e-08	3.29277e-06
SLC4A7	469.87	0.954525	3.72791e-08	3.55925e-06
TNFAIP3	498.339	1.03448	4.21586e-08	3.99292e-06
XYLT1	128.518	1.03719	4.49763e-08	4.22599e-06
ADA	95.8821	1.09014	4.92208e-08	4.58839e-06
FERMT3	60.6063	1.43301	5.04632e-08	4.66745e-06
BCAT1	368.612	-0.686149	5.47506e-08	5.02475e-06
CHST12	156.747	1.1534	5.56422e-08	5.06729e-06
HSPH1	1164.96	-0.727272	6.58226e-08	5.90359e-06
VIT	64.9616	-1.10662	6.5686e-08	5.90359e-06
CALHM2	21.7326	1.50568	6.76733e-08	6.02394e-06
LMO4	524.946	0.868188	7.89957e-08	6.97933e-06
SLC38A5	235.311	-0.854146	8.04895e-08	7.05863e-06
RP11-47A8.5	56.6486	1.19081	8.69374e-08	7.56803e-06
LGR4	112.066	-0.99079	8.91913e-08	7.70756e-06
RASSF4	186.874	-0.908894	1.01353e-07	8.69509e-06
SEL1L3	351.393	1.27563	1.06957e-07	9.10983e-06
IL4I1	44.3747	1.3994	1.07941e-07	9.12798e-06
KLHL24	232.442	1.0359	1.1823e-07	9.92711e-06
NAV3	9.88342	-1.70036	1.2974e-07	1.08168e-05
CORO2A	94.1946	-1.31667	1.31122e-07	1.08556e-05
IRF1	63.5401	1.00958	1.46462e-07	1.19583e-05
SLC44A2	36.3373	1.3569	1.45577e-07	1.19583e-05
GLIPR1	43.1871	1.4213	1.50925e-07	1.22041e-05
GPX1	1500.7	0.706294	1.51534e-07	1.22041e-05
HIST1H2BK	661.803	1.13699	1.58795e-07	1.27025e-05
TRIB3	149.527	-1.0889	1.70644e-07	1.35588e-05
CA5B	24.2648	1.45041	1.75014e-07	1.38133e-05
S100A9	241.535	-1.235	1.9588e-07	1.53578e-05
DCAF5	88.4515	0.957703	2.08231e-07	1.61089e-05
PJA2	449.69	0.568376	2.09543e-07	1.61089e-05
YPEL5	129.352	0.888742	2.0809e-07	1.61089e-05
MSRB1	165.557	-0.932079	2.12623e-07	1.62403e-05
CTD-2228K2.7	13.4444	1.56548	2.46246e-07	1.86643e-05
UGCG	197.374	1.02246	2.47512e-07	1.86643e-05
AZU1	787.706	-1.22939	2.4959e-07	1.87019e-05
CARHSP1	405.783	0.674996	2.60287e-07	1.93808e-05
ELOVL3	81.5111	-1.20472	2.67052e-07	1.97602e-05
C19orf77	15.2706	1.51993	2.73971e-07	2.01463e-05
MAPKAPK3	248.742	-0.799268	2.7804e-07	2.03192e-05
ALDH1B1	86.5836	-1.04056	3.06165e-07	2.21017e-05
RRP1B	521.902	-0.553302	3.05813e-07	2.21017e-05
HOMER2	10.1859	1.6113	3.11285e-07	2.23352e-05
TKT	1419.58	-0.605555	3.24791e-07	2.31639e-05
CORO1C	221.773	0.79731	3.47638e-07	2.46398e-05
RP11-223A3.1	8.37234	1.58749	3.49649e-07	2.46398e-05
WHAMM	112.999	0.828022	3.5791e-07	2.50728e-05
BMF	62.7045	1.05238	4.12095e-07	2.86988e-05
AFF1	614.856	0.838139	4.46202e-07	3.08923e-05
RFC3	448.851	-0.825071	4.79399e-07	3.29977e-05
IFNLR1	8.57974	1.60918	4.89827e-07	3.32546e-05
MRAS	143.114	-0.821452	4.91557e-07	3.32546e-05
PPP1R3B	23.3918	1.3486	4.87194e-07	3.32546e-05
PXK	504.999	-0.749609	4.96028e-07	3.33663e-05
TNFSF13B	585.992	-0.956018	5.24437e-07	3.5078e-05
ARHGAP11A	454.595	-0.58867	5.35294e-07	3.5603e-05
ORM1	1310.91	-0.846792	5.41054e-07	3.57851e-05
MIR146A	52.3162	1.06209	5.85202e-07	3.82899e-05
SEPHS2	1927.6	0.79101	5.88316e-07	3.82899e-05
ST3GAL6	83.1589	-0.954224	5.88627e-07	3.82899e-05
CEBPD	327.16	-0.918361	6.0074e-07	3.88642e-05
MYLK4	81.4965	1.08607	6.98303e-07	4.49305e-05
FUT4	526.508	-0.536769	7.26869e-07	4.65157e-05
REXO4	348.928	-0.801673	7.90198e-07	5.02965e-05
RANBP1	539.432	-0.52108	7.95909e-07	5.03891e-05
KLF13	263.709	0.897178	8.02569e-07	5.05405e-05
CCT3	1140.46	-0.525167	8.08428e-07	5.06401e-05
CCDC109B	27.4452	1.31647	8.19267e-07	5.10489e-05
PSMA7	1883.54	-0.433421	8.70701e-07	5.39698e-05
ABCB4	20.4713	1.38332	8.89693e-07	5.48598e-05
DKC1	2138.18	-0.640235	9.28318e-07	5.69448e-05
SLC25A36	264.643	0.712287	9.58584e-07	5.84983e-05
SLC35D2	19.522	1.52997	9.71074e-07	5.89566e-05
APBB2	94.4163	-0.874724	9.87392e-07	5.96415e-05
RPF2	409.932	-0.663508	1.13389e-06	6.81426e-05
RP11-556E13.1	7.4308	1.55764	1.15439e-06	6.90241e-05
ZNF503	83.6072	0.89795	1.16439e-06	6.92725e-05
DNASE2	7.84503	1.55128	1.19148e-06	6.98731e-05
HTR1F	44.8493	1.17204	1.19696e-06	6.98731e-05
POU2F2	361.583	0.62192	1.19809e-06	6.98731e-05
RP11-800A3.4	74.9595	-1.30455	1.1903e-06	6.98731e-05
HELZ2	18.9683	1.41175	1.27667e-06	7.40908e-05
RAP1GAP2	19.6618	1.43706	1.3383e-06	7.72884e-05
HEXIM1	198.227	0.723384	1.35162e-06	7.76789e-05
MEIS1	211.05	0.709071	1.38846e-06	7.91913e-05
RASA3	131.139	0.890201	1.39132e-06	7.91913e-05
NLRC5	150.792	-0.925567	1.42042e-06	8.04611e-05
MRPS5	493.405	-0.521275	1.44329e-06	8.13669e-05
CDKN2C	340.977	0.675596	1.55181e-06	8.70707e-05
FOXO3	147.027	0.830616	1.61506e-06	9.01921e-05
PRTN3	23.8269	-1.30501	1.73678e-06	9.65337e-05
RSAD2	6.95526	1.52468	1.91848e-06	0.000106135
RP1-244F24.1	16.6381	1.35461	1.93387e-06	0.000106489
ITGAL	1001.79	0.899427	2.15593e-06	0.000118167
AHCTF1	442.757	-0.498337	2.22617e-06	0.000121455
KIAA1614	22.0271	1.40914	2.49703e-06	0.000135607
POLB	162.261	0.739103	2.60365e-06	0.000140752
SRD5A1	15.0844	1.3648	2.67926e-06	0.000144181
B3GALT4	9.6541	1.49273	2.75082e-06	0.000146537
CDC25A	213.812	-0.710302	2.74283e-06	0.000146537
MLK4	245.631	-0.692324	2.76017e-06	0.000146537
ADD1	295.004	0.603595	2.86324e-06	0.00015133
RPP40	115.706	-0.932592	2.98423e-06	0.000156329
SMAP2	223.343	0.609308	2.9811e-06	0.000156329
MGAT3	92.1339	1.30462	3.16617e-06	0.000164405
PTCRA	7.14204	1.49435	3.15953e-06	0.000164405
DUSP10	42.7344	1.1712	3.2653e-06	0.000168812
CSE1L	435.583	-0.492423	3.30523e-06	0.000170133
LPIN1	167.402	1.1566	3.36045e-06	0.000172227
CTSO	34.854	1.18257	3.48131e-06	0.000177275
IRF7	20.9696	1.27716	3.4889e-06	0.000177275
ACBD3	693.662	0.597799	3.54691e-06	0.000178689
EVI2A	249.291	0.941678	3.54518e-06	0.000178689
C16orf87	114.894	0.745659	3.5853e-06	0.000179857
AC084018.1	33.9763	1.11057	3.84747e-06	0.000192195
ZNF217	423.213	0.571452	3.8817e-06	0.00019309
TTC26	99.6654	-0.879779	3.92471e-06	0.000194412
VDAC3	1021.19	-0.553073	3.97328e-06	0.000195999
SSRP1	1620.1	-0.627047	4.05002e-06	0.000198955
MS4A6A	47.3295	-1.08549	4.14696e-06	0.000202103
UAP1	140.879	-0.74699	4.14825e-06	0.000202103
SLIRP	933.274	-0.55956	4.21675e-06	0.000204599
DAPK2	9.14996	1.47038	4.35668e-06	0.000210525
FAM105A	68.8708	-1.09797	4.44208e-06	0.00021378
RP11-427H3.3	205.167	0.696366	4.58566e-06	0.000219796
NASP	1257.64	-0.506226	4.82107e-06	0.000230148
RP11-84C10.2	45.6607	-1.07617	4.981e-06	0.000236827
SERPINB9	6.42139	1.45824	5.04888e-06	0.000239095
MALAT1	18164.4	0.969064	5.09782e-06	0.00024045
TARS	1040.82	-0.507607	5.36272e-06	0.000251941
DCTPP1	383.454	-0.725422	5.45592e-06	0.000255307
TSC22D1	80.4127	1.1675	5.73465e-06	0.000267293
CLEC2D	31.9474	1.42579	5.85307e-06	0.000271743
UCHL5	1287.4	-0.616272	5.90231e-06	0.000272959
PAN3	306.633	0.717991	6.33639e-06	0.000291893
TMEM147	474.192	-0.727922	6.55862e-06	0.000300959
ZDHHC3	363.24	-0.652139	6.59714e-06	0.000301558
RNASE2	644.263	-0.900092	6.66163e-06	0.000303335
CACNA1A	113.232	0.879209	6.80708e-06	0.00030877
AK1	20.8635	1.29036	7.22006e-06	0.000326253
MAN1A1	48.0303	1.09377	7.32119e-06	0.000329565
MYL12A	1525.19	0.713593	7.39431e-06	0.000331596
CCR2	141.149	-1.21012	8.24541e-06	0.000368368
CEP70	76.7689	0.925729	8.51665e-06	0.000379055
DGKE	280.932	0.640369	8.76511e-06	0.000388652
DHCR7	152.92	-0.858024	8.85545e-06	0.000389738
FMNL3	44.6676	1.01607	8.84429e-06	0.000389738
MED9	188.274	1.05685	9.04545e-06	0.000396626
HEG1	53.1941	1.03077	9.24324e-06	0.000403804
S100A8	50.0023	-1.104	9.37854e-06	0.000408208
LGALS1	637.699	1.11584	9.47184e-06	0.000410759
DNAJB2	6.96196	1.41857	9.55235e-06	0.000412738
SIRPB1	212.61	-0.641505	9.78494e-06	0.000421251
C10orf2	179.809	-0.776917	9.82814e-06	0.000421577
EVI2B	592.79	0.694144	9.89216e-06	0.000422791
PVRL4	8.72085	1.41019	1.03245e-05	0.000439682
GEMIN4	150.963	-0.808716	1.06681e-05	0.000452686
VEZF1	172.4	0.760751	1.13446e-05	0.000479672
EBNA1BP2	623.988	-0.50049	1.2053e-05	0.000507811
NOM1	237.817	-0.561865	1.21714e-05	0.000510981
MTMR10	69.016	0.827022	1.24315e-05	0.000516777
PRDX4	172.02	-0.733749	1.24828e-05	0.000516777
RAB27B	19.3589	1.26493	1.23539e-05	0.000516777
SLC26A9	29.522	-1.09385	1.2484e-05	0.000516777
RNF144A	135.429	0.906486	1.26661e-05	0.000522486
MCM3	1294.9	-0.531433	1.30315e-05	0.000535695
PRAM1	55.1424	-0.921811	1.3241e-05	0.000542421
SORT1	66.8308	0.890961	1.33524e-05	0.000545099
TUBG1	289.906	-0.706848	1.35038e-05	0.000549386
HSD11B1	7.70229	-1.39963	1.35736e-05	0.000550335
WBP1L	173.035	0.716032	1.36488e-05	0.000551497
ZNF608	22.2318	1.20616	1.42437e-05	0.000573577
BIN2	443.772	0.546091	1.47849e-05	0.000591347
SRGAP1	17.3543	1.33046	1.47837e-05	0.000591347
IRF2	134.691	0.859781	1.4841e-05	0.000591591
MYO1G	186.898	0.652009	1.50623e-05	0.000598399
SYNCRIP	2484.64	-0.432254	1.53626e-05	0.000608286
CYLD	141.475	0.743015	1.59081e-05	0.000627786
ACACA	158.859	-0.677702	1.61609e-05	0.000635643
PAG1	908.705	0.65206	1.63915e-05	0.00064258
MYO10	27.7254	1.17517	1.66563e-05	0.000648663
RNF24	386.868	0.536328	1.66294e-05	0.000648663
COMMD3	401.409	0.58346	1.7206e-05	0.000667874
NUAK1	129.818	0.760902	1.73573e-05	0.000671548
PM20D2	540.856	-0.511672	1.75547e-05	0.000676969
TMEM65	197	0.87999	1.76274e-05	0.000677567
PAM	94.6918	0.770478	1.77287e-05	0.000679256
CCDC26	63.7095	-0.950526	1.89066e-05	0.000722037
CUX1	221.661	0.623483	1.89673e-05	0.000722037
NOLC1	773.837	-0.633166	1.92117e-05	0.000728998
MRPS26	293.668	-0.752532	1.97056e-05	0.000745349
GSN-AS1	7.88701	1.35479	2.07072e-05	0.000780742
LINC00649	41.8236	1.02344	2.08754e-05	0.000784583
RXFP2	14.6422	-1.35559	2.09734e-05	0.000785774
HMBS	117.571	-0.730108	2.12589e-05	0.000793955
TCERG1	885.167	-0.496484	2.18747e-05	0.000814384
AXL	16.8176	1.17637	2.20575e-05	0.000817632
SMC1A	1095.42	-0.399968	2.21e-05	0.000817632
SLC9A7	23.4332	1.22443	2.23152e-05	0.000823021
PTBP3	1174.63	0.607418	2.26653e-05	0.000833339
PHGDH	239.728	-0.716695	2.35102e-05	0.000861726
C6orf226	55.8467	0.87985	2.38112e-05	0.000869734
MXD4	131.878	0.870667	2.38756e-05	0.000869734
APOC1	30.1179	1.33781	2.41021e-05	0.000875292
NOP16	564.294	-0.768775	2.44051e-05	0.000883583
NAT10	571.065	-0.540859	2.47646e-05	0.000893865
INPP5D	826.03	0.672222	2.58743e-05	0.000931082
CACYBP	763.461	-0.483323	2.61494e-05	0.000938128
NFAM1	157.286	-0.922499	2.62985e-05	0.000940627
ALDH2	25.8855	1.263	2.75077e-05	0.000980916
DANCR	313.612	-0.70293	2.89659e-05	0.00102673
DDX17	1838.43	0.428452	2.89384e-05	0.00102673
KIAA0020	859.289	-0.456846	2.94948e-05	0.00104236
MCM4	977.321	-0.626606	3.03154e-05	0.00106817
GRPEL1	996.338	-0.608078	3.06667e-05	0.00107734
TPM2	25.0189	1.24028	3.08104e-05	0.00107918
CD48	125.984	1.19543	3.1874e-05	0.00111315
SLC25A42	21.6155	1.15507	3.21625e-05	0.00111992
DCPS	227.028	-0.810598	3.28147e-05	0.00113642
MTHFD1L	177.016	-0.734442	3.28283e-05	0.00113642
RP11-368P15.3	21.1491	1.14579	3.43989e-05	0.00118731
RGS2	13.8856	1.28659	3.54337e-05	0.00121948
NUP85	522.739	-0.485344	3.55784e-05	0.00122091
LDHA	897.465	-0.612367	3.69261e-05	0.00126349
OGT	197.321	0.765089	3.78122e-05	0.00129008
SYNPO	6.02893	1.30819	3.96515e-05	0.00134895
MAP1LC3B	98.5837	0.846467	3.98545e-05	0.00135197
GLG1	388.769	0.745133	4.01508e-05	0.00135813
OPTN	28.6026	1.07145	4.09791e-05	0.0013822
ANP32E	1717.34	-0.494816	4.25975e-05	0.0014327
CACNA2D3	65.4469	-1.03637	4.27816e-05	0.00143482
FAM20C	42.7272	1.08335	4.37976e-05	0.00146474
LBR	1865.99	-0.520359	4.53986e-05	0.00151401
HSPD1	2341.78	-0.67959	4.58057e-05	0.0015233
CERKL	299.157	0.50734	4.63524e-05	0.00153716
RP11-566K19.6	91.3919	0.834877	4.6954e-05	0.00155276
CD69	328.295	0.864093	4.79255e-05	0.00158047
F11R	87.9828	0.764429	4.91464e-05	0.00161176
TSR1	200.86	-0.723288	4.90637e-05	0.00161176
RP11-390P2.4	14.6668	1.23463	5.11806e-05	0.00167383
RRP7A	230.948	-0.630248	5.14416e-05	0.00167773
TRPM4	159.078	0.920879	5.15912e-05	0.00167799
IFI16	124.665	0.704818	5.30441e-05	0.00171589
SH3BP1	185.007	0.747324	5.30462e-05	0.00171589
USP2	35.5425	1.0561	5.46184e-05	0.00176193
KB-1410C5.5	14.101	1.271	5.50844e-05	0.00177213
POU6F1	29.6167	1.19515	5.57699e-05	0.00178932
HS3ST3B1	109.964	0.752345	5.75332e-05	0.00184091
POP1	251.343	-0.738198	5.85255e-05	0.00186761
GBP2	29.2247	1.16963	5.90986e-05	0.00188083
TEC	94.2126	1.06502	5.99065e-05	0.00190143
PRKCB	196.326	-0.714042	6.11356e-05	0.00193525
TNFRSF10A	221.677	-0.6937	6.16662e-05	0.00194684
DDAH2	29.2839	1.13498	6.23134e-05	0.00196204
BCOR	282.645	0.610478	6.34281e-05	0.00199184
GPATCH4	402.759	-0.628915	6.5373e-05	0.00203671
RNF122	29.4325	0.995952	6.52967e-05	0.00203671
SERPINF1	72.7694	0.822955	6.50623e-05	0.00203671
PPM1G	1679.26	-0.563881	6.56591e-05	0.00204026
LLGL2	46.5422	0.950852	6.60329e-05	0.0020465
KMT2E	414.391	0.703949	6.64886e-05	0.00205524
CAMKK2	456.098	0.747604	6.8059e-05	0.00209831
SFXN1	377.876	-0.451132	6.8894e-05	0.00211853
RNF213	209.333	0.554459	6.95667e-05	0.00213368
RAB32	46.4018	-1.03625	7.05722e-05	0.00215829
SOD1	1871.93	-0.387131	7.07338e-05	0.00215829
CLEC4D	11.8275	-1.2757	7.20964e-05	0.00218859
TRAM2	93.9749	0.862417	7.20501e-05	0.00218859
LYL1	101.817	-0.935336	7.35146e-05	0.00222593
CAPN11	12.2084	1.2667	7.37707e-05	0.00222799
CXCR4	668.764	-0.841207	7.40629e-05	0.00223112
WDR26	392.096	0.748078	7.51943e-05	0.00225946
LINC00910	18.1467	1.17196	7.56657e-05	0.00226786
HMGN5	192.169	-0.834012	7.64727e-05	0.00228275
TPX2	633.384	-0.599188	7.67409e-05	0.00228275
USP53	64.2047	0.897929	7.65942e-05	0.00228275
CCND3	1194.45	-0.477549	7.95043e-05	0.00235313
PRKACB	116.458	0.891467	7.94297e-05	0.00235313
MPO	29.0061	-1.15445	8.04367e-05	0.00237479
CLEC5A	31.0056	-1.13431	8.31122e-05	0.00244767
MCM10	279.271	-0.526029	8.66312e-05	0.00254498
BROX	501.264	0.610991	8.72907e-05	0.00255801
BZRAP1	163.275	0.995787	8.75681e-05	0.0025598
PIK3IP1	31.5083	1.12467	9.07034e-05	0.00264492
KIAA0430	239.795	0.507463	9.1844e-05	0.0026716
RAB11FIP4	28.3469	1.09592	9.30621e-05	0.00269069
RUVBL1	746.21	-0.640731	9.31821e-05	0.00269069
SLC7A1	354.663	-0.62906	9.29291e-05	0.00269069
FAM98A	78.6998	-0.81689	9.37555e-05	0.0026941
LDLRAD4	23.8671	1.02716	9.35841e-05	0.0026941
NFATC1	158.084	1.06584	9.47361e-05	0.00271569
SLC37A1	77.275	0.98786	9.53335e-05	0.00272622
ALG3	340.65	-0.506051	9.65809e-05	0.00275523
RAB33A	18.1112	-1.20725	9.69422e-05	0.00275889
GPR114	41.3778	0.909765	9.84091e-05	0.00278059
HIST1H1PS1	6.66808	1.24245	9.83235e-05	0.00278059
ZMAT1	39.3584	0.933479	9.82904e-05	0.00278059
FAM120AOS	133.67	0.798081	9.91161e-05	0.0027939
ARHGEF6	391.387	-0.408501	0.000100489	0.00282586
EMG1	352.772	-0.792421	0.000101279	0.00283269
KDM3A	174.483	0.611012	0.00010145	0.00283269
PINX1	100.482	-0.665019	0.000101197	0.00283269
GPR126	309.476	0.736935	0.000103571	0.00288512
TMEM45A	16.3208	-1.21088	0.000104708	0.00290994
HSPA9	1104.46	-0.452503	0.000105774	0.00292584
SIGMAR1	277.011	-0.709206	0.000105693	0.00292584
NOB1	359.673	-0.483413	0.000106583	0.00294134
MRPS12	484.383	-0.702217	0.00010823	0.00296604
PTBP1	1624.77	-0.366251	0.000107816	0.00296604
TTBK2	124.905	0.934244	0.000108205	0.00296604
C11orf24	83.9433	-0.689094	0.000110027	0.00299652
FAM227B	13.17	1.1442	0.000110101	0.00299652
UHRF2	404.115	0.697568	0.000109724	0.00299652
DDX10	260.663	-0.519184	0.000111268	0.00302133
CITED4	244.202	-0.831952	0.000112229	0.00304045
USP11	191.696	0.545298	0.000114649	0.00309892
FLAD1	56.2348	-0.848703	0.000116458	0.00313353
NEO1	27.7489	-1.18525	0.000116285	0.00313353
PFDN6	274.688	-0.687381	0.000117674	0.00315906
NEIL3	170.976	-0.743522	0.000120282	0.00322176
RASGRP1	10.0197	1.22839	0.000121433	0.00324524
TSC22D3	115.906	1.18198	0.000121864	0.00324943
FLT3	272.451	0.478904	0.000125359	0.00333512
MTHFR	103.675	0.842718	0.000127048	0.00337247
PKIB	51.8148	0.74761	0.000127888	0.00337961
SLC22A18	6.06504	1.21982	0.000127606	0.00337961
ELK3	81.5218	0.951177	0.0001286	0.0033866
FADS2	283.471	-0.897907	0.000128725	0.0033866
SLC39A3	170.714	-0.662391	0.000131276	0.00344608
LINC01021	216.403	0.932171	0.000139464	0.00364421
LYAR	389.414	-0.715603	0.000139748	0.00364421
TRMT10C	364.532	-0.644082	0.000139565	0.00364421
TFEC	12.7383	-1.20987	0.000140403	0.00365326
FOXJ3	221.518	0.98847	0.000144095	0.0037411
CCNB1	448.338	-0.602527	0.000146771	0.00379393
FBXO32	55.6156	0.845626	0.00014668	0.00379393
MARCKS	83.7825	-0.755358	0.000148657	0.00383306
SRGAP3	15.4948	1.16945	0.000148932	0.00383306
ATIC	459.092	-0.454909	0.000151137	0.00388136
CBR1	142.346	-0.6421	0.000152262	0.00390179
MIIP	169.617	-0.735402	0.000153964	0.00393689
C12orf57	193.121	0.691864	0.000154614	0.00394334
METTL7A	122.492	1.06084	0.000154883	0.00394334
MAPK8IP3	22.8882	1.00374	0.000155413	0.00394835
VNN2	5.86751	1.16779	0.000156593	0.00396982
RP11-65L3.2	9.64263	-1.18841	0.000159773	0.00404178
ALDH6A1	106.314	0.686608	0.000160739	0.00405755
CPNE3	154.985	0.671233	0.000162717	0.00409003
WDR43	787.893	-0.563561	0.000162505	0.00409003
CTA-331P3.1	31.8715	-1.02817	0.000164494	0.00412594
PUS1	226.228	-0.582237	0.000166459	0.00416639
BMI1	397.069	0.667725	0.000171913	0.00429383
EXOSC4	168.206	-0.58239	0.000174366	0.00434593
RP11-356I2.4	29.7373	1.12767	0.000174978	0.00435203
SYNJ2	176.343	-0.673374	0.000176574	0.0043825
MTDH	2952.49	-0.336855	0.000178697	0.00442593
TRHDE	81.2924	-0.894993	0.000179766	0.00444311
FERMT1	169.584	-0.58171	0.000184114	0.0045332
SLC9A9	7.64997	1.18452	0.000184177	0.0045332
LARP6	8.26361	1.19855	0.000186323	0.0045765
GPR183	33.4053	1.05137	0.000190119	0.00466009
FCGR2A	44.4018	0.891986	0.000191373	0.00468113
HOMER3	323.359	-0.828756	0.00019272	0.00469817
VPS37B	54.3141	0.787172	0.000192864	0.00469817
MFSD2A	90.6751	-0.744398	0.00019347	0.00470327
CCM2	238.582	0.756015	0.000194886	0.00472797
FGD4	40.1732	0.943198	0.000203198	0.00490381
ITSN2	316.961	0.614434	0.000203376	0.00490381
ZNF438	57.9344	-0.919101	0.000203118	0.00490381
POLR3G	123.315	-0.589369	0.000207125	0.00498404
SDSL	15.6842	1.16747	0.000208795	0.00501405
ABI1	271.707	0.484239	0.000210629	0.00504785
RPP25	53.6641	-0.763242	0.000211784	0.00506527
DSTN	648.696	0.533483	0.000212469	0.00507142
CILP2	25.618	-1.18961	0.000213157	0.00507759
ANTXR2	143.754	0.687484	0.000214727	0.00508661
DUT	2376.28	-0.462819	0.000214824	0.00508661
ECE2	93.4942	-0.775571	0.00021464	0.00508661
TIAM1	18.4424	1.06072	0.000217816	0.00514714
HOXA5	117.932	0.753891	0.000220219	0.00519358
SOAT1	291.863	-0.431044	0.000222987	0.0052484
CHST13	24.567	-1.16141	0.000231876	0.00544679
TNFRSF1B	531.505	-0.594635	0.000232638	0.00545385
NDUFA6	408.755	-0.451626	0.000234236	0.00548046
CA2	385.187	0.518124	0.000236262	0.00551698
BATF3	52.5281	-0.943553	0.000238939	0.00556851
GTPBP4	743.504	-0.409772	0.00024158	0.005619
RP11-383J24.6	59.7412	0.868244	0.000242251	0.00562354
STRA13	102.594	-0.58718	0.000243459	0.00562951
TBRG4	135.696	-0.610513	0.000243274	0.00562951
PSMD2	995.309	-0.439639	0.000245605	0.00566807
LPPR3	202.558	-0.949183	0.00025162	0.00579558
IMP4	348.323	-0.68818	0.000262176	0.006027
RAB27A	329.221	-0.432434	0.000265897	0.00608722
TAGAP	125.597	-0.630315	0.000266338	0.00608722
WDR34	161.396	-0.61723	0.000265555	0.00608722
EFTUD2	685.097	-0.356622	0.000268063	0.00611482
KMO	8.01644	1.16688	0.000273203	0.0062201
NBR1	284.511	0.65158	0.000274661	0.0062413
PSMG1	223.851	-0.715179	0.000280157	0.00635398
RP11-125B21.2	8.1665	1.16126	0.000283228	0.00641135
NCLN	340.765	-0.645846	0.000287309	0.00649131
ZFAND3	256.908	0.871175	0.000291461	0.00657258
BTBD7	167.456	0.623925	0.000293517	0.00660638
DPYSL2	521.225	0.834823	0.000295369	0.00663542
ARHGDIB	3468.13	-0.38745	0.000297138	0.00666252
C1orf54	71.4417	1.00041	0.000307627	0.00688468
ARID5B	40.0727	1.03435	0.000310315	0.00693174
NDFIP2	153.069	0.655051	0.000311448	0.00694394
PLEKHO1	158.259	0.697519	0.000314205	0.00699225
MFNG	437.202	-0.554695	0.000314914	0.00699488
APPL2	49.4935	0.917485	0.000319025	0.00706488
GSN	172.544	1.00976	0.000319259	0.00706488
ATP6V1H	132.517	0.684923	0.000331819	0.00728978
ATP9A	10.449	1.15375	0.000331885	0.00728978
MND1	218.928	-0.551806	0.000330333	0.00728978
SERPINB8	162.839	-0.612972	0.000331516	0.00728978
SLC25A10	90.5727	-0.778965	0.000340704	0.00746962
MRPL44	89.2064	-0.613577	0.000343682	0.00752098
MYBL2	687.79	-0.720897	0.000347787	0.00759678
DDX18	784.065	-0.374933	0.000349803	0.00762674
ARL6IP5	420.085	0.727131	0.000350794	0.00763428
CD93	407.199	-0.572702	0.000351586	0.00763748
HIST1H3D	9.06745	1.13659	0.000352266	0.00763825
RP4-647J21.1	68.972	0.70556	0.000355994	0.00770496
RP4-717I23.3	48.502	1.02109	0.000360693	0.00779242
HSP90AB1	10678.1	-0.521936	0.000362008	0.00780659
FRMD3	10.3187	-1.11964	0.000363666	0.00782808
AIFM1	341.557	-0.419105	0.000367954	0.00790599
LPP	96.2382	1.04405	0.000372065	0.00797985
NOP56	1068.24	-0.704102	0.000375514	0.00803926
MMP24-AS1	84.648	0.692633	0.000381699	0.00815693
ARHGAP10	60.228	0.826554	0.000384342	0.0081986
CSTA	1367.68	-0.584999	0.000386048	0.00822019
HOXA9	675.41	0.60768	0.000387542	0.00823718
OSBPL3	34.2889	0.933691	0.000389321	0.00826016
VMP1	499.266	0.44166	0.000390702	0.00827463
FBN2	103.543	-0.666407	0.000392485	0.00829756
CDH24	7.00601	1.13304	0.000393265	0.00829922
LRP10	120.916	0.677938	0.000406069	0.00855419
PFAS	110.987	-0.681135	0.000406905	0.00855656
CLPP	411.337	-0.579116	0.000412705	0.00866315
CCL5	753.484	0.457225	0.000414676	0.00868326
SLFN5	17.5142	1.11209	0.00041513	0.00868326
ABCA7	15.6037	1.07314	0.000421286	0.00879648
RBM28	418.413	-0.499195	0.000422298	0.00880208
SOCS2	561.526	0.629557	0.000427946	0.00890413
AK4	101.093	-0.718924	0.000429742	0.008911
RP11-1055B8.7	7.34198	-1.1344	0.000429781	0.008911
CDK19	235.517	0.671493	0.000433784	0.00897004
EPT1	225.692	-0.594215	0.000434902	0.00897004
H6PD	49.4785	1.0899	0.000434339	0.00897004
CFLAR	395.685	0.467873	0.000435954	0.0089761
ANKRD22	10.6035	-1.13043	0.000438759	0.00901818
NET1	167.475	-0.53849	0.000441663	0.00906214
NFKBIA	396.462	0.906097	0.000443271	0.00907939
DNAJC4	11.2216	1.11581	0.000445553	0.00911036
TNRC6B	473.761	0.713058	0.000452366	0.00923373
CDKN2D	173.132	0.800779	0.000453598	0.00924294
C17orf67	25.3164	1.02322	0.000459176	0.00934053
DCAF13	252.271	-0.537846	0.000469531	0.00953479
RNASE6	74.5347	0.614343	0.000470553	0.00953917
ENO1	2272.65	-0.453786	0.000479211	0.00969808
RHPN1-AS1	15.0537	1.06286	0.000482938	0.00975683
RIOK3	267.201	0.582856	0.000485378	0.00978941
ATAD3B	37.0183	-0.928651	0.000487103	0.00980749
TRPS1	282.998	0.493598	0.000490975	0.00986867
MGAT4A	53.7814	0.751315	0.000496356	0.00995962
SGPP1	45.6635	0.827643	0.000497182	0.00995962
UBE2H	453.251	0.595833	0.000499901	0.00999717
IMPDH1	189.265	-0.582341	0.000503331	0.0100488
PAXIP1	171.631	-0.471047	0.000505858	0.0100822
SAMSN1	34.2704	0.837762	0.00050728	0.0100936
DEGS2	23.2819	1.01935	0.000509698	0.0101077
TP53INP1	52.1344	0.886536	0.000509625	0.0101077
FUT8	78.9744	0.949577	0.000513053	0.0101403
SLCO4A1	84.2636	-0.850296	0.000512308	0.0101403
HVCN1	69.0616	0.728342	0.000517911	0.0102192
POLA2	80.367	-0.745239	0.000521931	0.0102814
FAM13B	107.487	0.635617	0.000524319	0.0103113
AMICA1	17.7564	0.990242	0.000529463	0.0103952
UPF3A	43.3589	0.950079	0.000531678	0.0104214
USP10	255.269	-0.492966	0.000533198	0.0104339
RHOC	20.1047	1.04561	0.000536802	0.0104871
SYTL1	76.7111	-0.797243	0.000542179	0.0105747
RP1-239B22.5	72.9188	-0.891522	0.000543321	0.0105796
FARSB	273.54	-0.5287	0.000544747	0.0105899
SETDB2	286.456	0.77332	0.000548601	0.0106299
ZNF259	127.464	-0.707036	0.000548204	0.0106299
TMEM158	32.9687	0.961576	0.000553748	0.0107121
TMA16	617.033	-0.45011	0.000559108	0.0107982
CHD2	287.501	0.532828	0.000576724	0.0111022
MRPL17	278.888	-0.601189	0.000576051	0.0111022
AC009506.1	86.9924	0.820699	0.000584652	0.0112365
TUBB	6858.7	-0.565891	0.000599216	0.0114978
TRIM71	42.6106	-0.80828	0.000601473	0.0115224
GABARAPL1	51.1996	0.920535	0.000605988	0.0115901
HMGCL	78.3754	0.7161	0.000615935	0.0117489
PTEN	418.282	0.631072	0.000616272	0.0117489
SGSM2	85.088	0.686833	0.000620898	0.011818
ST3GAL1	229.158	0.508233	0.00062488	0.0118747
ATAD3A	125.45	-0.64605	0.00064751	0.0122851
EIF2B3	123.648	-0.602986	0.000648835	0.0122905
KARS	822.104	-0.33081	0.000650717	0.0123064
NCAPG2	356.816	-0.455154	0.000662632	0.0125118
TUG1	302.375	0.563334	0.000663712	0.0125122
GPRC5C	18.8022	1.07852	0.000666662	0.0125279
RP11-356K23.1	7.17396	1.08606	0.000666196	0.0125279
AHR	92.8675	0.737065	0.000672048	0.0125338
ARSD	70.2628	0.816475	0.000672268	0.0125338
FTSJ3	237.08	-0.529724	0.000669339	0.0125338
TIMM8A	67.8253	-0.646752	0.0006681	0.0125338
VARS	180.627	-0.543207	0.000670584	0.0125338
MRPS35	314.875	-0.502659	0.00067945	0.0126301
MRPS9	186.013	-0.473108	0.000679566	0.0126301
BRI3BP	1454.25	0.555322	0.000685804	0.0127261
WDR3	374.231	-0.671952	0.000690905	0.0128007
FAM107B	1330.81	-0.379331	0.000693938	0.0128368
BUB1B	257.646	-0.522162	0.00069782	0.0128884
MRPL15	337.189	-0.44468	0.000700899	0.012905
SH3BGRL	393.453	0.529166	0.000700654	0.012905
SLU7	499.697	0.348029	0.000704708	0.012955
RP11-284N8.3	34.4604	-0.896306	0.000708583	0.0129859
YBX3	1251.39	-0.567694	0.000707799	0.0129859
PDLIM1	580.996	0.673944	0.000713266	0.0130516
DHODH	46.0855	-0.786435	0.000714968	0.0130625
HN1	802.481	-0.438657	0.000717522	0.013089
CDT1	349.011	-0.459505	0.000719785	0.0131101
C17orf58	158.537	-0.567438	0.000725748	0.0131414
CHCHD4	177.834	-0.74592	0.000725927	0.0131414
FAH	121.699	-0.556634	0.000724821	0.0131414
GNL2	268.761	-0.561199	0.000727055	0.0131414
PSRC1	58.9176	-0.695294	0.000726155	0.0131414
MSMO1	125.011	-0.781593	0.000730693	0.0131781
PPP1R16B	75.8326	0.838557	0.000731312	0.0131781
2016-03-06	446.052	0.403525	0.000734134	0.0132088
GABARAPL2	596.411	0.854655	0.000741916	0.0133286
2016-09-11	499.9	-0.510305	0.000745129	0.013366
DMWD	6.15965	1.06475	0.000746503	0.0133704
CHEK1	231.668	-0.581963	0.000757514	0.0135267
ETV4	123.088	-0.605001	0.000756488	0.0135267
TMEM97	206.986	-0.623655	0.000760927	0.0135672
TIMM50	218.945	-0.562698	0.000765435	0.013627
RSU1	303.94	-0.41522	0.000768126	0.0136544
PQLC3	147.106	0.707428	0.000770937	0.0136838
CHAF1A	205.336	-0.559142	0.000773069	0.0137011
GPR82	7.72341	1.07715	0.000778914	0.0137841
GRAMD1B	70.0979	-0.678236	0.00078394	0.0138523
MGEA5	426.207	0.554262	0.000786994	0.0138856
GGH	160.504	-0.580287	0.000789938	0.0139168
SRPK1	703.962	-0.555707	0.000791194	0.0139182
FIBCD1	157.095	-0.703988	0.000792794	0.0139257
CASC7	368.263	0.648025	0.000814254	0.0142663
MUM1	176.914	0.680949	0.000814597	0.0142663
RP13-977J11.2	20.2566	0.955574	0.000816465	0.0142779
HSP90AA1	6955.84	-0.491651	0.000819476	0.0143094
KAT6B	184.97	0.641761	0.000822152	0.014335
TOR1A	262.669	-0.415493	0.000829205	0.0144367
PDCD11	502.657	-0.548692	0.000838874	0.0145537
RP11-75L1.2	8.90979	1.05419	0.000839614	0.0145537
SELRC1	47.8363	-0.790281	0.000838197	0.0145537
DHX33	225.856	-0.556304	0.000845822	0.0146241
ZNF598	31.5336	-0.81842	0.000846145	0.0146241
EIF2B4	194.974	-0.504295	0.000854415	0.0147182
HDGF	1424.45	-0.393656	0.000853155	0.0147182
PNRC1	882.577	0.923606	0.000855317	0.0147182
CTSV	36.3758	0.909041	0.000876807	0.0150661
LRP8	248.103	-0.55869	0.000881114	0.0151181
CCDC88B	77.9397	0.680101	0.000885771	0.0151541
CD320	103.688	-0.63863	0.000885425	0.0151541
CTPS1	294.817	-0.450265	0.000896531	0.01525
IPCEF1	50.1312	0.740136	0.0008955	0.01525
LEPROT	112.463	0.621788	0.000893691	0.01525
PKP4	215.715	-0.539326	0.000896528	0.01525
SEC14L1	130.493	0.562409	0.000903192	0.0153413
MRPL12	290.723	-0.658209	0.000910309	0.01544
MCM5	369.106	-0.571921	0.000913218	0.0154672
C21orf91	193.665	0.675237	0.000933192	0.0157829
ZC3H6	82.6721	0.66383	0.00094317	0.015929
KBTBD11	292.499	-0.416809	0.00096621	0.0162948
MLXIP	114.824	-0.619907	0.000981246	0.0165249
ELAC2	136.9	-0.712077	0.000986563	0.0165438
NIP7	170.626	-0.514206	0.000984927	0.0165438
RARRES3	8.74431	1.03342	0.00098571	0.0165438
TOX2	32.7051	1.05967	0.000991257	0.016599
SCO1	273.336	-0.53909	0.000993435	0.016612
MRPS2	275.376	-0.659821	0.00100156	0.0167242
LOXHD1	20.3594	-0.957116	0.00100392	0.01674
ARHGEF3	302.157	0.79719	0.00100702	0.0167681
GAD1	7.17104	1.05456	0.0010152	0.0168805
NCL	7573.4	-0.548967	0.00101906	0.016921
BZW2	858.138	-0.424187	0.00102343	0.0169697
TMX4	526.792	0.401143	0.00102534	0.0169777
HPS4	238.168	0.618442	0.00103144	0.017031
VAMP5	8.57944	1.05446	0.00103136	0.017031
ANKLE1	29.8258	-0.903137	0.001045	0.0172308
MOB1A	544.865	0.534939	0.00104646	0.0172309
FASTKD1	136.29	-0.636471	0.0010566	0.0173737
FBXO38	63.9172	0.708731	0.00106021	0.0173848
PGP	183.056	-0.587939	0.0010596	0.0173848
POLR3E	96.8367	-0.603491	0.00107345	0.0175775
AMOTL1	91.1674	-0.670279	0.00107628	0.0175996
SLC51A	18.0774	-0.969808	0.00108051	0.0176443
RP11-347P5.1	18.0845	0.936166	0.00109807	0.0179063
SRSF7	1061.47	-0.444753	0.00110456	0.0179875
GPR65	67.9568	0.667137	0.00111492	0.0181312
MID1IP1	490.904	0.546675	0.00111993	0.0181877
SNRPD3	976.634	-0.409174	0.00113018	0.018329
CCNA2	249.124	-0.532894	0.00114217	0.0184845
LPXN	314.032	0.856413	0.00114289	0.0184845
KCNK5	36.4576	-0.866856	0.00115378	0.0186352
DLAT	208.368	-0.470462	0.00116444	0.0187818
EFCAB14	217.795	0.507821	0.00117038	0.0188199
KIAA0355	25.7197	0.86317	0.00116937	0.0188199
ORC1	119.037	-0.677527	0.00117157	0.0188199
SSBP2	74.0413	0.594388	0.00118049	0.0189375
LINC00899	198.883	0.707064	0.001189	0.0190481
MRPS34	438.074	-0.61393	0.00119207	0.0190715
POLD2	249.612	-0.710437	0.00119741	0.0191311
NECAP2	197.185	0.860194	0.00123664	0.0197312
HOXA-AS2	6.92689	1.01989	0.00124392	0.0197913
SSB	738.45	-0.569558	0.00124473	0.0197913
STIM1	297.521	0.482851	0.00124542	0.0197913
DCUN1D5	265.04	-0.528569	0.0012558	0.0199296
XRCC6BP1	131.55	-0.792833	0.00126708	0.0200816
PDGFA	29.9166	1.01631	0.00128712	0.0203447
ZBTB1	122.477	0.620256	0.00128564	0.0203447
BAG1	420.805	-0.580047	0.00129446	0.0204335
SNX18	52.3799	0.811218	0.00130098	0.0205091
GART	451.323	-0.538808	0.00130431	0.0205341
CCT2	1980.87	-0.349698	0.00131027	0.0205732
TBL2	87.4616	-0.586832	0.00130901	0.0205732
SERPINH1	156.938	0.544312	0.00132204	0.0207306
GCNT1	66.6815	0.829775	0.00133084	0.020841
MRPS7	178.863	-0.464077	0.00134219	0.020965
NADK2	133.328	-0.548544	0.0013423	0.020965
HNRNPDL	2244.81	-0.363648	0.00134693	0.0210096
TALDO1	838.344	-0.416765	0.00135262	0.0210707
IFNAR2	74.917	0.748524	0.00137138	0.0213347
PBX3	1106.83	0.5943	0.00138773	0.0215326
PER2	148.093	-0.486775	0.00138605	0.0215326
EMILIN2	391.16	-0.421949	0.00139787	0.0216614
PGK1	1581.72	-0.501934	0.00142175	0.0220027
GSK3B	192.516	0.468289	0.00144512	0.022306
PNO1	122.078	-0.578514	0.00144332	0.022306
SLC25A32	221.963	-0.449257	0.00144886	0.0223347
WDR91	45.6774	0.797614	0.00145239	0.02236
KCNA3	19.2707	-0.98496	0.00145629	0.0223909
NOL7	39.6313	-0.840403	0.00146982	0.0225404
PIK3C3	144.083	0.515533	0.00146814	0.0225404
HOXA3	42.213	0.934312	0.00148052	0.0226751
MIDN	728.497	0.533677	0.00149062	0.022771
MSX2	15.7516	0.968727	0.0014901	0.022771
AMD1	565.987	-0.416611	0.00149995	0.0228839
KIT	10.4127	1.01287	0.00150252	0.0228935
STX7	141.146	0.551385	0.00150784	0.0229451
CCDC58	136.289	-0.605808	0.00151151	0.0229714
DNAJB4	34.9876	0.845261	0.00152239	0.0231072
WWC1	42.0684	-0.694032	0.00152995	0.0231922
RERE	114.31	0.561038	0.0015483	0.0234403
WDFY4	271.963	-0.404374	0.00155201	0.0234664
GRWD1	206.217	-0.508083	0.00156089	0.0235707
PAK1	230.939	-0.440687	0.00157962	0.0237796
PHACTR3	476.566	-0.582741	0.00158477	0.0237796
RAB11FIP1	311.523	0.405917	0.00158333	0.0237796
RP11-145M9.4	284.435	-0.469832	0.00158076	0.0237796
TRANK1	26.9677	0.840568	0.00157854	0.0237796
ALDH3B1	153.544	-0.638879	0.00159293	0.0238717
GRB10	98.0619	-0.644457	0.00160936	0.0240876
AGT	193.067	-0.751257	0.00161145	0.0240883
ZBTB18	291.51	0.870822	0.00161844	0.0241624
HAUS7	74.7782	-0.656555	0.00162796	0.0242738
ARHGEF2	298.477	0.538626	0.00163594	0.0243621
PREX1	285.222	0.720721	0.00164155	0.024415
RP6-99M1.2	95.6886	0.736812	0.00164576	0.0244469
PWP1	504.723	-0.407288	0.00165414	0.0245406
MED13L	547.398	0.709789	0.00166213	0.0246282
KIF17	118.081	-0.615752	0.00167356	0.0247356
WASL	46.0523	0.835021	0.00167205	0.0247356
HSPA4L	236.05	-0.737487	0.00167969	0.0247953
DPH2	109.412	-0.651843	0.00169215	0.0248946
RUFY4	72.1894	0.81931	0.00169273	0.0248946
ZMYND19	98.4503	-0.805679	0.00168898	0.0248946
NOP2	124.149	-0.676197	0.00169503	0.0248976
CPSF3	363.95	-0.37052	0.00170658	0.0250052
NEAT1	445.827	0.833213	0.00170645	0.0250052
TRMT61A	52.0173	-0.696871	0.00170988	0.0250226
RIT1	61.3973	0.678453	0.00173193	0.025305
UBAC1	205.048	-0.437932	0.00173345	0.025305
GTF3C6	567.454	-0.47279	0.00173618	0.0253136
EAPP	275.037	0.398004	0.00174156	0.0253608
CRAMP1L	68.5779	0.579457	0.00174783	0.0254173
ITGAX	11.0194	0.971538	0.00174973	0.0254173
HPDL	87.2824	-0.713504	0.00175539	0.0254683
LSMD1	691.109	-0.5241	0.00177241	0.0256092
NDFIP1	275.468	-0.564273	0.0017685	0.0256092
SLAIN1	59.6866	-0.656028	0.00177376	0.0256092
SP110	110.936	0.640848	0.00177249	0.0256092
TTC14	521.351	0.511977	0.00178197	0.0256964
OSTF1	235.809	0.585798	0.00179165	0.0258046
FHL1	29.6199	0.847963	0.00180876	0.0260193
LPCAT2	256.671	-0.613984	0.00181323	0.026052
MIEF1	352.831	-0.425069	0.00182303	0.026161
RP11-218M22.1	38.489	0.843799	0.00182573	0.0261681
C7orf50	239.842	-0.467909	0.00185813	0.0266002
RPL23AP79	61.1229	-0.603198	0.0018658	0.0266778
CAD	319.817	-0.497438	0.00188013	0.0268503
SLC28A3	59.9049	-0.78621	0.00190169	0.0271254
SP140L	59.9636	0.784529	0.00190481	0.0271372
RELB	315.957	0.682599	0.00193302	0.027506
TRIM8	95.3925	0.764866	0.00193649	0.0275223
FES	32.2317	0.832813	0.00193931	0.0275294
SCARB1	194.803	-0.542522	0.00194681	0.0276028
COPS6	186.129	-0.467118	0.00194954	0.0276084
CCNG2	221.095	0.935401	0.00197256	0.027901
BCKDK	87.1925	-0.557167	0.00198162	0.0279646
CDKN1B	244.179	0.528403	0.00198414	0.0279646
JAK1	303.877	0.552954	0.00198383	0.0279646
AHRR	210.149	0.541735	0.00199864	0.0281354
RP11-4O1.2	28.62	0.761732	0.00200237	0.0281545
CCDC167	154.657	-0.492798	0.00201253	0.0281635
DDX54	734.193	-0.395757	0.00201413	0.0281635
DSCC1	166.221	-0.544418	0.0020091	0.0281635
RAD1	130.859	-0.554659	0.00200855	0.0281635
RNF19B	32.2788	0.954461	0.00201491	0.0281635
TIAM2	24.9928	0.821446	0.00203122	0.028358
FUS	2751.47	-0.224848	0.00204333	0.0284935
MPHOSPH6	338.717	-0.54692	0.00205396	0.0286081
MRPL3	661.064	-0.435344	0.00206986	0.0287956
PHF11	89.9384	0.577181	0.00208611	0.0289876
DDX1	1126.95	-0.491005	0.0020979	0.0291173
B4GALT2	305.495	-0.834545	0.00211652	0.0292629
LRRFIP2	127.754	0.456422	0.00211828	0.0292629
PA2G4	766.096	-0.545968	0.00211202	0.0292629
SATB1	1513.67	0.352959	0.00211603	0.0292629
NDUFAF2	153.656	-0.457818	0.00213246	0.0293902
PRUNE2	6.80525	0.984614	0.00213134	0.0293902
PSAT1	193.182	-0.709353	0.00213539	0.0293964
RAB7A	965.007	-0.289299	0.00215295	0.0296037
RABGAP1	116.663	0.527604	0.00216534	0.0297395
BST1	145.24	-0.449261	0.00217377	0.0298207
RP11-380G5.3	22.7906	0.929131	0.0021777	0.0298401
DDX56	128.762	-0.479098	0.00218746	0.0298853
MEX3A	60.2063	-0.700336	0.00218858	0.0298853
RNF170	76.0229	0.685175	0.00218581	0.0298853
RAD51	118.044	-0.610395	0.00220857	0.0301235
ITM2B	398.932	0.566143	0.002216	0.0301902
ARID3B	43.6579	0.700211	0.00223833	0.0304593
HSH2D	88.5282	0.652703	0.00226561	0.0307251
POLE4	228.124	-0.396403	0.00226565	0.0307251
VRK1	492.876	-0.426026	0.00226047	0.0307251
RP11-658F2.8	21.8568	0.882522	0.00227377	0.0307999
ZMIZ1	265.652	0.6711	0.00228187	0.0308743
PRSS57	645.888	-0.452271	0.00229297	0.0309892
GSTCD	67.7193	-0.678427	0.00230536	0.0311211
YWHAZ	589.969	0.342545	0.00230886	0.0311328
HLA-DMB	12.7313	0.940029	0.00231584	0.0311894
NDUFB10	620.935	-0.420346	0.00232096	0.0311894
ZNF655	72.4792	0.549201	0.00231854	0.0311894
TBCC	175.564	0.599317	0.00232574	0.0312182
RRP12	195.33	-0.733829	0.00234091	0.0313863
RP11-169K16.9	65.9889	0.603527	0.00234724	0.0314355
FGD3	56.6676	0.773781	0.00235422	0.0314934
CUL4B	230.55	0.541767	0.00236386	0.0315867
PVR	36.0563	-0.696659	0.00236776	0.031603
GAB1	23.544	0.848694	0.00238888	0.0318144
NCOA2	122.395	0.59454	0.00238942	0.0318144
SMG6	72.7406	0.66622	0.00239166	0.0318144
UBALD2	915.983	0.756367	0.00239976	0.0318864
MCTP1	164.346	-0.62822	0.00241324	0.0320295
RP11-166P13.3	9.24578	0.952222	0.00242004	0.0320838
ZNF575	6.34564	0.970164	0.00244984	0.0324426
CENPH	150.431	-0.554031	0.00246387	0.0325919
DACH1	775.736	0.493969	0.00247993	0.0327677
DIDO1	204.835	0.50173	0.00250723	0.0329256
EFNA4	9.99621	0.941253	0.00251006	0.0329256
HIST2H2BE	25.609	0.95389	0.00250903	0.0329256
RP11-214O1.3	14.7395	0.897487	0.00251134	0.0329256
RP11-295G20.2	54.4238	-0.711011	0.00250077	0.0329256
SECISBP2L	90.3582	0.7656	0.00250765	0.0329256
UHMK1	564.792	0.298407	0.0025002	0.0329256
HNRNPAB	930.362	-0.657642	0.0025455	0.0333365
RAB8B	104.391	0.525499	0.00254891	0.0333442
ADAM8	53.9685	0.971598	0.00256238	0.0334835
SLC43A2	47.3811	0.858309	0.00258328	0.0337194
SPC24	101.926	-0.549388	0.00259013	0.0337715
CENPW	456.534	-0.609899	0.00261516	0.0340377
IMPA2	110.305	-0.626313	0.00261782	0.0340377
MCAT	91.2517	-0.588609	0.00262204	0.0340377
STK17A	241.994	-0.699494	0.00261979	0.0340377
C10orf118	116.201	0.687374	0.00263618	0.0341507
PARVG	363.602	0.342272	0.00263652	0.0341507
FUCA1	98.264	0.672752	0.00265377	0.0343365
PUS7	144.792	-0.661957	0.00271063	0.035034
SH2D4A	51.7572	-0.796756	0.00274361	0.0354215
DFNA5	30.0075	0.81631	0.00277663	0.0358089
KNOP1	168.878	-0.600697	0.00279733	0.0359889
P2RY11	41.0963	-0.696275	0.00280083	0.0359889
SLC19A1	150.089	-0.670204	0.00280275	0.0359889
ZNF703	15.2612	0.922411	0.00279528	0.0359889
TEX2	128.276	-0.441644	0.00280909	0.0360313
PRSS21	182.018	-0.510815	0.00281752	0.0361002
METTL1	68.8984	-0.792988	0.0028337	0.0362323
SLC9B2	89.6215	-0.615322	0.00283395	0.0362323
ATP8A1	88.183	0.887545	0.00286487	0.0365881
SLC39A6	488.841	-0.437992	0.00287086	0.0366251
LRRC59	219.338	-0.495098	0.00288449	0.0367198
ZC3H12C	64.6927	0.77087	0.00288155	0.0367198
CYB561A3	17.6956	0.882228	0.002903	0.0369158
TRAPPC2	57.394	0.671552	0.00291979	0.0370894
CCNG1	233.755	0.630981	0.00293975	0.037303
TTLL12	310.564	-0.553737	0.00295739	0.0374867
TGM5	70.2096	0.748737	0.00296119	0.0374947
CAMK2D	73.6171	0.785698	0.0029646	0.0374978
JAG1	36.7182	0.715367	0.00296801	0.0375008
SH3BGRL3	41.4076	0.865059	0.00298011	0.0376136
PTPRU	6.25973	-0.956006	0.00300538	0.0378115
RP11-473M20.16	9.22839	-0.943603	0.00300057	0.0378115
ZBTB38	32.0182	0.845755	0.00300428	0.0378115
PSMC5	563.597	-0.384619	0.00302703	0.0380435
RP11-297L17.6	8.29303	-0.942508	0.00304362	0.0382114
TRIM26	95.1805	0.574441	0.0030476	0.0382209
WDR46	330.661	-0.532529	0.00305181	0.0382332
RB1	269.09	0.458847	0.00305654	0.038252
NDUFS5	746.029	-0.354283	0.00306127	0.0382708
CRTAP	297.952	0.785617	0.00307538	0.0384066
CIR1	328.018	0.486914	0.0030803	0.0384275
DDX27	585.485	-0.345304	0.00309586	0.038581
CBX3	3736.72	-0.431368	0.00310979	0.038709
EIF5B	2121.34	-0.5135	0.00311436	0.038709
UTY	45.3528	0.744814	0.00311594	0.038709
LONP1	151.085	-0.51434	0.00311996	0.0387182
RP11-1105G2.3	7.7522	0.944698	0.00314505	0.0389888
ERBB2IP	607.571	0.598026	0.00315663	0.0390913
METTL13	174.435	-0.434294	0.00317144	0.0391519
RP11-25K19.1	24.2616	0.771881	0.00316933	0.0391519
SUCLG1	604.02	-0.351031	0.00316827	0.0391519
SMAD3	59.5914	0.797775	0.00317726	0.0391829
CTU1	53.7929	-0.728461	0.00318574	0.0392058
DTL	372.508	-0.442782	0.0031844	0.0392058
PLOD3	138.58	-0.480962	0.00319698	0.0393032
HGSNAT	127.098	0.455755	0.00321984	0.0394613
SYNGR1	251.461	0.426465	0.00321771	0.0394613
YARS	348.259	-0.538654	0.0032177	0.0394613
ZBTB25	31.3421	0.775511	0.00323026	0.0395481
DICER1-AS1	6.70378	0.940643	0.0032608	0.0398808
HOMER1	130.066	-0.57856	0.00326778	0.0399249
ATP2B4	623.142	0.379058	0.00329004	0.0401554
SNX33	24.239	0.779109	0.00330543	0.0403017
VWCE	69.0784	-0.728344	0.00331536	0.0403812
CKB	14.9586	0.875954	0.00332112	0.0404098
CYP2R1	58.1898	-0.630572	0.00334445	0.0406102
PDSS1	49.9134	-0.677136	0.00334263	0.0406102
PVRL2	100.592	0.511471	0.00340286	0.0412771
SPG20	330.833	-0.433195	0.00344981	0.0418038
STAP1	29.6776	0.84239	0.00345776	0.0418573
ADAMTS10	12.075	0.938593	0.003471	0.0419746
MFF	266.887	-0.395966	0.00351668	0.0424837
ATG13	385.816	0.540215	0.00354107	0.0427164
TMED8	793.345	-0.483643	0.00354316	0.0427164
NT5DC3	71.5284	-0.630332	0.00355635	0.0428317
ABCE1	410.183	-0.494656	0.00357585	0.0429782
ABCF2	208.048	-0.485166	0.0035794	0.0429782
NKD2	70.8828	0.586596	0.0035737	0.0429782
LYST	2121.51	-0.623579	0.00358444	0.0429951
HNRNPLL	105.474	-0.648104	0.00359481	0.0430759
FKBP4	115.318	-0.753507	0.00360136	0.0431108
SETMAR	34.0531	-0.687174	0.00360612	0.0431241
SLC40A1	91.2749	-0.77699	0.00361006	0.0431276
PGAP1	28.8921	-0.775403	0.00361458	0.0431381
LINC00977	9.70595	-0.937104	0.00362981	0.0432763
DGAT2	138.246	-0.751134	0.00364899	0.0434612
AP001063.1	6.17243	-0.921658	0.00366211	0.0434861
PSMD5-AS1	25.9102	0.761204	0.00366192	0.0434861
TSPAN9	26.2524	0.721057	0.00365825	0.0434861
CD3EAP	39.0651	-0.817612	0.00366756	0.0435072
INTS6-AS1	24.0068	0.797634	0.00367278	0.0435256
TIFAB	7.14401	-0.93573	0.00368581	0.0435928
ZNF24	642.388	0.355947	0.00368436	0.0435928
TWSG1	43.4917	0.815636	0.00370463	0.0437716
CHORDC1	148.208	-0.427292	0.00372946	0.0439998
SERPINB1	390.502	-0.432972	0.00373138	0.0439998
FAM212A	10.3801	-0.927441	0.00374103	0.0440523
TAP1	45.635	0.72532	0.00374327	0.0440523
CXCR2P1	10.5137	0.930741	0.00376925	0.044314
NME3	36.7948	0.732767	0.00379253	0.0445434
DDX55	107.772	-0.705071	0.00380578	0.0446053
HIPK1	168.737	0.469919	0.0038091	0.0446053
RBPJ	780.591	-0.288188	0.00380905	0.0446053
GIMAP1	10.675	0.886373	0.00385746	0.045127
FBXL17	91.9432	0.519707	0.00386372	0.0451556
RP11-568N6.1	8.88783	0.915268	0.00388091	0.0453117
FASN	888.722	-0.786671	0.00390961	0.0455569
INPP4A	92.5033	0.681022	0.00390848	0.0455569
SDF2L1	615.617	-0.649589	0.00392035	0.0456372
RNASEL	106.726	0.514741	0.00393325	0.0457424
ABCF1	957.827	-0.350826	0.00396516	0.0459585
CORO1B	53.4926	0.792929	0.00397041	0.0459585
GRK6	218.666	-0.617252	0.00395647	0.0459585
NXPE3	115.243	-0.501621	0.00396158	0.0459585
WIPF1	420.241	0.531048	0.00397124	0.0459585
DNAJC2	306.766	-0.468474	0.00399243	0.0461363
TPT1	11091.2	0.443669	0.0039944	0.0461363
ITGB5	14.2426	0.892758	0.00399935	0.0461484
DNAJC25	56.4991	-0.594031	0.00405868	0.0467419
TUBA4A	55.9624	-0.873944	0.00405618	0.0467419
MLEC	581.554	-0.4503	0.00407795	0.0468272
PBXIP1	144.994	0.678369	0.0040749	0.0468272
VAT1	583.767	-0.710882	0.00407786	0.0468272
APEH	409.967	-0.46119	0.00411298	0.0470925
C8orf33	380.093	-0.499778	0.00410666	0.0470925
DAPP1	124.237	0.530695	0.00411071	0.0470925
CBX7	39.5525	0.836766	0.0041492	0.0474264
MRPS15	197.878	-0.443084	0.00415417	0.0474264
NLN	373.818	-0.624159	0.00415269	0.0474264
PIK3CB	192.19	-0.490418	0.00416312	0.0474828
AMT	9.15994	0.903819	0.00421218	0.0478122
C4orf36	46.1336	0.801473	0.00420947	0.0478122
NME4	506.623	-0.473366	0.00420495	0.0478122
PPRC1	109.042	-0.624118	0.00421623	0.0478122
RP11-299J3.8	14.4327	0.895196	0.00421317	0.0478122
RRP15	478.19	-0.399807	0.00421341	0.0478122
IDI1	260.072	-0.600841	0.00422649	0.0478769
KIAA0930	2724.91	-0.757132	0.00423003	0.0478769
NFE2	11.3537	-0.920689	0.00426577	0.0482354
RPS6KA3	216.404	0.634536	0.00427803	0.0483278
CTNNAL1	134.911	-0.696615	0.00429613	0.0484399
CYBB	600.961	0.327465	0.00429493	0.0484399
RAB2B	83.6322	0.678111	0.00431656	0.0485778
TOP2A	6531.52	-0.438582	0.00431254	0.0485778
ZNF639	176.977	-0.461153	0.00432237	0.0485969
C1orf63	310.051	0.596707	0.0043382	0.0487286
HELLS	514.026	-0.36722	0.00436061	0.0489339
MKRN1	193.084	0.446163	0.00439031	0.0491739
SEPSECS	37.8371	0.837538	0.00438681	0.0491739
LYRM7	323.601	-0.446226	0.00440037	0.04924
MCU	164.251	-0.486318	0.00442315	0.0494482
WDR4	234.053	-0.648305	0.00443592	0.0495442
RNASEH2C	231.737	-0.521005	0.00446504	0.0498224
CCNDBP1	147.92	0.439201	0.00447323	0.0498669
ARRDC3	22.184	0.816181	0.00450021	0.0501204
CBLB	19.3566	0.786004	0.00451628	0.0502521
PPAN	104.689	-0.562526	0.00452565	0.050309
GOLGB1	496.03	0.662982	0.0045654	0.0507033
GOT2	446.341	-0.456313	0.00458396	0.0508617
CISH	14.8268	-0.83664	0.0046156	0.0511648
TNK2	107.015	0.520828	0.00464675	0.051462
CPQ	132.17	0.459074	0.00466232	0.0515861
GYG1	156.692	-0.406356	0.00469647	0.0519155
FGR	176.846	-0.523432	0.00470126	0.05192
NETO2	334.805	-0.312907	0.00471719	0.0520473
NXT1	141.584	-0.522315	0.0047428	0.0522812
NUMB	325.399	0.480619	0.00474855	0.0522959
IFITM3	6.81488	0.905502	0.00481554	0.0529844
RP11-66B24.7	5.97424	0.887948	0.00483052	0.0530998
RUNX1	329.907	-0.353459	0.00483949	0.0531491
MRPL24	249.384	-0.420753	0.00486647	0.0533464
TOM1	53.4655	0.641074	0.00486588	0.0533464
MBD4	343.61	-0.385169	0.00487842	0.0533785
PDE4A	42.7833	0.685136	0.00487734	0.0533785
SYNRG	178.936	0.550726	0.00489133	0.0534705
BRD1	163.736	0.458745	0.00491072	0.0535834
FAM49A	142.504	0.637028	0.00490649	0.0535834
LIG3	164.03	-0.454711	0.00492136	0.0536501
RFX3	53.5253	0.731752	0.00495135	0.0539273
POLR1A	133.236	-0.448917	0.0049704	0.054085
AC091814.2	46.8403	-0.637133	0.00504079	0.0547884
TRIM16	28.2157	-0.724584	0.00504429	0.0547884
GFOD1	99.113	-0.511693	0.00506736	0.0549885
KCTD7	33.4939	0.739735	0.00507713	0.0549937
KLHL3	13.2362	0.897217	0.00507657	0.0549937
CHST10	71.9928	-0.565088	0.00509966	0.0551873
LETM1	298.354	-0.465743	0.00512864	0.0554502
FOXN3	324.053	0.411964	0.00514071	0.05553
SARNP	43.2083	0.63424	0.00515804	0.0556271
SGK223	115.236	0.629869	0.0051591	0.0556271
NUP62	314.031	-0.375288	0.00517374	0.0557343
BNIP3L	183.111	0.42304	0.00518277	0.0557807
ARAP3	39.9222	-0.822497	0.005214	0.0560659
OGFOD1	294.533	-0.556459	0.00527549	0.0566756
CANX	1939.94	-0.360891	0.00528955	0.0567616
SP2	83.8678	0.48592	0.00529308	0.0567616
CCNI	2564.11	0.264819	0.00530365	0.0567721
USP1	851.732	-0.471279	0.00530019	0.0567721
MTHFD1	260.916	-0.554064	0.00531049	0.056794
RP11-707M3.3	9.60028	0.895354	0.00531601	0.0568016
BTG1	1135.32	0.435173	0.00535001	0.0569294
DNAJA1	480.739	-0.376177	0.00535201	0.0569294
ELOVL6	204.604	-0.477566	0.00534731	0.0569294
STK10	196.327	0.511542	0.00535033	0.0569294
TRIM65	162.299	-0.566204	0.0053465	0.0569294
TAF4B	100.304	-0.676401	0.00538767	0.0572573
PIGU	146.977	-0.544231	0.0054158	0.0574601
RNU5F-1	16.3123	0.819709	0.00541646	0.0574601
GMFG	1429.64	0.314532	0.00546512	0.0578337
NSDHL	114.935	-0.570568	0.00545981	0.0578337
PALD1	30.4361	-0.754556	0.00546633	0.0578337
GADD45GIP1	268.581	-0.396665	0.00548747	0.0580055
DZIP3	15.183	0.814356	0.00551522	0.0582468
SYF2	791.747	0.351696	0.00554333	0.0584916
PGPEP1	210.651	0.582144	0.00556743	0.0586935
SHMT2	433.214	-0.392653	0.0055807	0.0587811
NLE1	104.139	-0.530764	0.00564251	0.0593793
C20orf112	60.5112	-0.632053	0.00564778	0.059382
WDR77	77.2389	-0.648904	0.00565462	0.0594011
ELF4	164.046	0.546084	0.00567417	0.0595537
DDX28	174.544	-0.568186	0.00569853	0.0597564
IDH1	76.4848	-0.591228	0.0057356	0.0600228
IDS	136.774	0.455308	0.0057363	0.0600228
PTDSS1	1618.38	-0.453388	0.00573915	0.0600228
AKAP13	186.254	0.535376	0.00576275	0.0600632
DCTN4	156.19	0.518579	0.00576325	0.0600632
RRS1	272.961	-0.692796	0.00576331	0.0600632
SPATC1L	35.0181	-0.770109	0.00575283	0.0600632
PSMD1	460.18	-0.346655	0.0057731	0.0601123
UBE2R2	862.447	0.36653	0.00580595	0.0604013
TRIP6	223.81	-0.407061	0.00583762	0.0606774
RAB13	37.8237	0.735379	0.00585208	0.0607744
DYNLT3	36.264	0.649504	0.00588763	0.0610899
CDC20	263.982	-0.493828	0.00589289	0.061091
SAPCD2	24.8148	-0.792276	0.00592116	0.0613272
SLC7A11	200.979	0.512004	0.00592604	0.0613272
ABHD14A	41.3208	-0.609359	0.00593798	0.0613972
RP11-395B7.7	170.995	0.488151	0.00595522	0.061468
STK17B	395.935	0.540489	0.00595168	0.061468
NHP2L1	1023.91	-0.444879	0.00597339	0.0615827
PUS3	79.8339	-0.554357	0.00597673	0.0615827
SNX30	45.1121	0.731438	0.00602753	0.0620521
PRICKLE1	25.5379	0.680554	0.00605781	0.0623097
MTF1	180.814	-0.423251	0.00607195	0.0624009
HMGA1	2213.51	-0.391256	0.00607951	0.0624244
ATP9B	53.3379	0.712551	0.00609091	0.0624872
NRBP1	653.234	0.350431	0.00610543	0.062582
BAG2	134.943	-0.495694	0.00613801	0.0628457
LEPR	18.4535	0.787091	0.0061449	0.0628457
LILRB2	11.4615	0.860014	0.00614708	0.0628457
TBC1D14	49.0464	0.872886	0.00615765	0.0628994
FDFT1	892.971	-0.517938	0.00617356	0.0630075
ADAT2	146.45	-0.499261	0.00618549	0.0630207
SLC16A3	202.825	-0.560067	0.00618247	0.0630207
ANP32B	3181.35	-0.367005	0.00620346	0.0631349
CIRH1A	165.408	-0.469399	0.00622801	0.0631349
IFIT3	8.36825	0.878417	0.00620751	0.0631349
RGL1	16.3819	0.87905	0.00621842	0.0631349
SERINC1	313.066	0.53034	0.00623403	0.0631349
STAT5A	196.125	0.490531	0.00623089	0.0631349
USP33	246.305	0.469888	0.00621694	0.0631349
PHC3	233.663	0.463673	0.00624658	0.0632079
MAD2L1	481.939	-0.399699	0.00625446	0.0632336
COG1	32.6751	0.799663	0.00631783	0.0636831
MFSD3	124.198	-0.689232	0.00632044	0.0636831
NAE1	665.977	-0.365406	0.00631944	0.0636831
RPUSD3	198.73	-0.423106	0.00631566	0.0636831
IDUA	8.69699	0.876948	0.00632685	0.0636935
MAPK14	348.785	-0.352325	0.00634338	0.0638057
THAP4	231.432	-0.499193	0.00637814	0.0641008
RARS	620.852	-0.444421	0.00644748	0.0647427
ZNF277	96.358	0.535352	0.00645996	0.0648131
ZMAT3	171.853	0.476494	0.00647542	0.0649132
CABLES1	91.5929	0.599531	0.00649333	0.0650376
KLHL28	69.2089	0.531042	0.00650826	0.0650573
SLC7A5	1025.63	-0.665683	0.00650897	0.0650573
ZNF804A	27.1156	-0.811487	0.00651178	0.0650573
STOM	238.273	-0.353903	0.00651836	0.0650682
PSMC3	392.759	-0.531391	0.00653956	0.0652248
BCL6	46.776	0.584012	0.00657898	0.0655628
C19orf59	13.2261	-0.865198	0.00658509	0.0655684
UBALD1	64.9376	-0.648745	0.00660525	0.0657139
SERTAD2	184.488	0.406759	0.00662135	0.0658187
VARS2	48.1446	-0.641627	0.00663269	0.0658762
F2R	95.324	0.682902	0.00665765	0.0660687
AC004840.9	6.8175	0.869681	0.00668736	0.0663079
C14orf80	57.7968	-0.558028	0.00671497	0.0664997
HIVEP1	60.1722	0.701717	0.00671932	0.0664997
IPO11	54.6064	-0.622486	0.00672355	0.0664997
NCK2	150.839	0.695881	0.00673	0.066508
FXN	84.716	-0.563798	0.00675126	0.0665707
KIAA1958	75.7326	0.547373	0.00675323	0.0665707
RPS27L	3344.25	-0.484015	0.006753	0.0665707
FAM163A	18.8885	-0.784974	0.00676245	0.0666062
ARID4A	384.688	0.455255	0.00684958	0.0673523
RP11-349A22.5	225.163	0.408756	0.00684907	0.0673523
EPC1	294.688	0.368336	0.00687981	0.0675934
HNRNPD	2919.32	-0.281041	0.0069092	0.0678259
TIPIN	108.838	-0.631077	0.00692401	0.067915
CPM	134.137	-0.637188	0.00693175	0.0679346
RIPK1	72.3353	0.610787	0.00695206	0.0680773
TICRR	69.2242	-0.549665	0.00701331	0.0686203
COA4	346.741	-0.435079	0.00703749	0.0688001
KLHL6	82.7696	0.732027	0.00710439	0.0693968
MBNL1-AS1	28.4014	0.675545	0.00712967	0.0695863
MFAP3	54.4403	0.536124	0.0071512	0.0697389
ZKSCAN8	84.9037	0.537234	0.00716489	0.069815
HRH2	46.5483	-0.660694	0.00724343	0.0705144
IL10RA	19.5233	0.813652	0.00724859	0.0705144
ELMOD3	11.7337	0.825432	0.00728926	0.0706777
NDUFB9	1109.3	-0.441916	0.00727999	0.0706777
RBFA	169.137	-0.453928	0.00728173	0.0706777
ZNF862	6.60116	0.857241	0.00728632	0.0706777
KIAA2018	178.511	0.519449	0.00730068	0.0707306
CHD3	802.054	0.375962	0.00733502	0.0709472
MYBBP1A	83.0139	-0.62469	0.00733176	0.0709472
UBE2G2	467.313	-0.345865	0.00735609	0.0710929
CTD-2020K17.1	5.84769	0.827343	0.00744443	0.0718543
DUSP7	178.172	0.831807	0.00744701	0.0718543
TMEM41B	61.656	0.547138	0.0074672	0.0719904
UBE2O	199.654	-0.42788	0.00749069	0.0721581
HECTD4	47.7036	0.700532	0.00750618	0.0722485
PAFAH1B3	154.904	-0.384796	0.00754099	0.0725246
PPAT	135.218	-0.664363	0.00754736	0.0725269
BSPRY	32.1749	-0.665115	0.00758431	0.0728229
GCC2	338.754	0.689966	0.00760956	0.0729809
RP11-690G19.3	106.347	0.698869	0.0076131	0.0729809
DTYMK	278.472	-0.490433	0.0076275	0.0730599
CASP7	80.6881	0.53156	0.00764352	0.0731541
CSRNP1	43.3586	0.606227	0.00770421	0.0736754
TRHDE-AS1	63.5164	-0.641254	0.00775771	0.0740896
ZNF609	177.334	0.602906	0.00776004	0.0740896
GKAP1	21.813	0.703281	0.00787126	0.0750835
PPIH	446.812	-0.530432	0.00787683	0.0750835
2016-09-06	331.133	0.415923	0.00799667	0.0761645
TBCEL	26.0424	0.740139	0.00803861	0.076441
TIMP1	122.016	0.487683	0.00803538	0.076441
ANXA6	283.508	-0.679626	0.00806359	0.0765826
KB-1507C5.2	6.52861	0.848925	0.00806643	0.0765826
STK24	329.423	0.463912	0.00807436	0.0765964
CCT8	1028.72	-0.301689	0.00808271	0.0766143
DDHD1	100.618	0.643995	0.00809387	0.0766587
PLEKHH2	10.3658	0.840858	0.00814818	0.0771113
POLR1C	186.613	-0.49439	0.0081557	0.0771209
MAML3	32.5707	0.663297	0.00823843	0.077841
HERC5	111.905	-0.415479	0.00825586	0.0779246
ZNF286A	25.4686	-0.804743	0.00826044	0.0779246
LARP1	962.555	-0.362586	0.00826746	0.0779287
THEM6	56.2722	-0.571049	0.00828926	0.078072
RP11-245G13.2	32.1127	0.720895	0.00831908	0.0782906
HSP90B1	2941.98	-0.299369	0.00832912	0.0783176
KPNA2	557.602	-0.407587	0.00833518	0.0783176
ARL5B	117.581	0.597424	0.00835979	0.0784452
NEDD9	69.2203	0.593889	0.00836201	0.0784452
C6orf48	1119.09	0.523708	0.00839203	0.0786644
EIF2S1	363.261	-0.336403	0.00842748	0.0788719
SRP72	1117.89	-0.294601	0.00842172	0.0788719
TSPAN14	184.258	-0.426828	0.00844591	0.0789819
CCDC85B	96.6742	-0.712093	0.00845273	0.0789833
ZNF584	19.1273	-0.766536	0.00847105	0.0790921
SOX4	1052.19	0.29754	0.00848133	0.0791257
ODF2	360.06	-0.315187	0.00850454	0.079155
RP1-249H1.4	114.571	-0.796332	0.00849759	0.079155
UNC93B1	149.559	-0.583649	0.0084992	0.079155
HSPA5	1546.93	-0.493764	0.00851987	0.0792355
EIF4G1	2366.15	-0.3166	0.00858898	0.0798155
CDS2	91.6483	0.578856	0.00861001	0.079823
GALK1	168.093	-0.478217	0.00860637	0.079823
PCMTD1	118.763	0.678183	0.00860029	0.079823
PATL2	5.91907	0.842531	0.00862039	0.0798566
MOK	391.124	-0.702603	0.00862794	0.0798641
CALCOCO1	17.1983	0.835867	0.00863919	0.0799057
ST3GAL5	21.7812	0.745135	0.00865756	0.0800132
ANKRD13C	73.7351	0.594091	0.0086962	0.0801605
FEM1B	184.514	-0.366108	0.00870058	0.0801605
JAK2	95.8506	0.436412	0.00868265	0.0801605
SEMA4D	140.168	0.44279	0.00869136	0.0801605
LYN	554.894	0.323193	0.00873113	0.0803793
DEFB1	16.6695	-0.765293	0.00876744	0.0805257
POLR2L	382.103	-0.403669	0.00876292	0.0805257
SNHG3	398.541	-0.51066	0.00876527	0.0805257
RP5-827C21.4	16.9879	0.762363	0.00880017	0.0807011
SLC11A2	79.2113	0.557815	0.00879384	0.0807011
SENP7	122.59	0.480864	0.00881557	0.0807798
IGF2R	617.043	0.584238	0.00882379	0.0807926
BTBD2	101.797	0.478132	0.00884075	0.0808854
IMMT	500.299	-0.317868	0.00894631	0.0817879
MIR181A2HG	7.72711	0.839037	0.00895801	0.0818317
PTCH1	26.4716	0.792084	0.0090337	0.0823964
ZNF652	161.038	0.549905	0.00903375	0.0823964
ADSS	686.912	-0.284893	0.00909477	0.0828891
UBE2W	242.773	0.331494	0.00922156	0.0839801
2016-03-09	37.103	-0.717551	0.00925022	0.0840471
USP2-AS1	23.3958	0.706398	0.00924851	0.0840471
XPR1	109.43	0.432134	0.00924634	0.0840471
KHSRP	2692.2	-0.339516	0.00926589	0.0841249
ACBD5	95.2745	0.601381	0.00928332	0.0841678
CD86	6.9303	0.834238	0.00928484	0.0841678
ALX1	301.681	0.45653	0.00931022	0.0843262
BRIX1	212.715	-0.528205	0.00934972	0.0843262
C16orf52	65.6184	0.507694	0.00935033	0.0843262
CDC37L1	78.5061	0.56977	0.00934061	0.0843262
MKLN1-AS1	21.7927	0.799629	0.00933281	0.0843262
MOB1B	93.3242	0.802724	0.0093377	0.0843262
MRPL1	517.463	-0.301381	0.00935217	0.0843262
TTF2	237.158	-0.494853	0.00943756	0.0850314
EIF1	2701.73	0.220564	0.0095342	0.0856719
LDHB	3654.18	-0.379224	0.00952379	0.0856719
LIG1	371.44	-0.359549	0.00952942	0.0856719
S1PR3	36.0826	-0.780646	0.00953759	0.0856719
GNB5	41.6725	0.600773	0.00954829	0.085703
MILR1	37.9621	0.739225	0.00956629	0.0857995
PARP10	29.4633	0.73976	0.00959485	0.0859254
SESN1	220.11	0.494145	0.0095941	0.0859254
DESI1	298.215	-0.526146	0.00963137	0.0861873
TRIP13	162.079	-0.646451	0.00965852	0.086365
ACSL3	465.085	-0.419532	0.00970528	0.0867176
ZDHHC6	149.619	-0.437112	0.0097752	0.0872764
ZSWIM6	56.3305	0.6717	0.00984233	0.0878096
CCDC64	13.3087	0.828513	0.00987029	0.0879927
C20orf27	407.51	-0.735249	0.00989406	0.0881383
CENPM	130.982	-0.519506	0.0099334	0.088336
MAP4K4	876.039	0.285615	0.00994302	0.088336
MRPL55	203.701	-0.42559	0.0099461	0.088336
NDUFC2	341.222	-0.359368	0.00992808	0.088336
RP11-379H18.1	15.7513	0.816898	0.0099853	0.0886176
PAN3-AS1	18.4907	0.719494	0.0100046	0.0887225
STAMBP	194.776	0.522621	0.010044	0.0890055
RP11-434H6.6	7.45381	0.817529	0.0100617	0.0890953
DNAAF3	8.32469	-0.827272	0.0100979	0.0893494
PPTC7	194.719	0.438937	0.0101174	0.0894552
POLDIP2	200.559	-0.450557	0.0102093	0.0902003
ATP5G1	1447.57	-0.463168	0.0102597	0.0904522
CLPB	57.9846	-0.617755	0.0102608	0.0904522
GSR	636.604	0.51942	0.0102589	0.0904522
GLO1	1520.2	-0.243215	0.010351	0.0911795
EIF1AX	405.843	-0.297739	0.0104356	0.0918569
KAZN	51.9693	-0.615947	0.0104459	0.0918793
WASF1	29.062	-0.74296	0.0104561	0.0919001
TIMM21	113.763	-0.517191	0.0105213	0.0924047
AGTRAP	77.7828	-0.673307	0.0105543	0.0926258
CASP10	32.6705	0.623738	0.0105659	0.0926588
ADAMTS1	22.4255	-0.693874	0.0105931	0.0928286
USP12	75.007	0.482767	0.01063	0.093083
COX7B	540.536	-0.338247	0.0106443	0.09314
MPC1	170.839	-0.410726	0.0106691	0.0932878
CPEB4	53.8765	0.564725	0.0107252	0.0936399
PRNP	166.62	0.437684	0.0107212	0.0936399
MFSD2B	30.5374	-0.634162	0.0107543	0.0938247
SLC22A4	12.7722	-0.821483	0.0107897	0.0940642
TSG101	208.55	0.325433	0.0108497	0.0945175
ASUN	196.041	-0.440867	0.0108594	0.0945329
FAM173B	24.8032	-0.658741	0.0108777	0.0946223
ADD2	210.034	-0.369766	0.0108857	0.0946225
SNX9	57.7589	0.633713	0.0109017	0.0946917
DTD2	74.469	-0.485663	0.0109357	0.0949178
HEATR3	80.8711	-0.581116	0.0109609	0.095012
NIPAL2	89.2957	0.499332	0.0109626	0.095012
SLC1A4	228.673	0.419969	0.0110028	0.0952209
ZNRF1	145.452	0.447109	0.0109992	0.0952209
CGREF1	95.1644	-0.471559	0.0110403	0.095406
PARP15	29.7265	0.745188	0.0110373	0.095406
NPRL2	60.6175	-0.567966	0.0110621	0.0954627
PSMB6	356.343	-0.433431	0.011063	0.0954627
ASIC1	34.4586	-0.72001	0.0111191	0.095877
NOL5BP	52.6005	-0.641934	0.0111461	0.0960399
PHTF2	141.793	0.472107	0.0112137	0.0965523
WDR12	542.755	-0.563656	0.0112251	0.0965799
GTF2IRD2B	6.63403	0.791919	0.0112755	0.0969028
RRP36	151.587	-0.394967	0.011279	0.0969028
C16orf72	91.8298	0.451531	0.011319	0.0971763
R3HDM2	189.329	0.581934	0.0113614	0.0974693
BOLA3	255.786	-0.433936	0.0113914	0.097656
GEMIN6	44.3849	-0.638567	0.0114165	0.0978004
C20orf194	71.1393	0.591473	0.0114414	0.0979431
FAM210A	128.302	-0.442534	0.0114614	0.0980433
PCID2	244.318	-0.396702	0.0115032	0.0983293
MRPL52	229.568	-0.405028	0.0115241	0.0983333
NHSL1	9.52236	0.794489	0.0115135	0.0983333
ZBTB4	88.6486	0.537038	0.0115286	0.0983333
FYTTD1	313.345	0.321589	0.0115648	0.0984915
PDIA5	125.855	-0.382634	0.0115721	0.0984915
SCYL2	185.352	0.382435	0.0115718	0.0984915
ACOX1	132.687	0.46359	0.011623	0.0988535
CCDC28A	384.969	0.501787	0.0116766	0.0992383
B4GALT5	323.855	-0.381756	0.0117053	0.0993402
MCOLN2	205.28	-0.556626	0.011701	0.0993402
RBM43	55.0279	0.682749	0.0117404	0.0995663
UMPS	266.887	-0.573958	0.0117528	0.0996001
DARS	778.178	-0.386316	0.0117668	0.0996478
EEPD1	45.8762	0.570271	0.0117806	0.0996581
NCAPH	257.228	-0.473635	0.0117849	0.0996581
ID2	11.5359	0.785669	0.0118079	0.0997817
RPL31	5614.78	0.276697	0.0118351	0.0999024
WHAMMP3	86.118	0.55371	0.0118391	0.0999024
ELF2	171.226	0.425031	0.0118525	0.0999442
PRMT1	1957.15	-0.517431	0.0118945	0.100227
EPDR1	84.8844	-0.444303	0.0119305	0.100459
RNF19A	181.502	0.709087	0.011964	0.10067
CTB-55O6.12	13.6153	0.758503	0.0120074	0.100963
ETF1	356.949	-0.354283	0.0120642	0.101239
IWS1	399.076	-0.304895	0.0120622	0.101239
MT-TL1	1016.7	0.528054	0.0120658	0.101239
ICT1	280.742	-0.301028	0.0121378	0.10177
FAM168A	70.2731	0.469082	0.0121604	0.101887
CALML4	43.6917	0.558143	0.0121838	0.102012
SPRYD7	143.694	-0.489474	0.0122145	0.102135
TMEM66	804.64	0.543285	0.012216	0.102135
VAMP4	75.1702	0.451432	0.0122245	0.102135
NTMT1	171.549	-0.562446	0.0123095	0.102773
DERA	63.0145	0.675833	0.012336	0.102922
SLITRK4	158.297	0.374543	0.0123496	0.102963
C1GALT1	140.101	0.528325	0.0124266	0.103459
SMPD1	24.9013	0.715416	0.0124214	0.103459
SLC17A5	94.9158	0.553215	0.0124754	0.103792
ALKBH2	109.963	-0.419675	0.0125282	0.103793
CTNNA1	119.008	0.468375	0.0124879	0.103793
MYO7A	11.7744	-0.791955	0.0125228	0.103793
PRRT4	44.839	-0.672013	0.0125151	0.103793
RRP9	85.6554	-0.615901	0.0124932	0.103793
TBX19	18.9065	0.7355	0.0125052	0.103793
RP11-95P2.1	12.0582	0.759004	0.0125781	0.104135
PCTP	70.8141	0.612786	0.0126392	0.104567
GCSAM	8.14126	0.795688	0.0126756	0.104722
TTC9C	44.489	0.54501	0.0126687	0.104722
HMGCS1	67.4984	-0.583503	0.0127233	0.105043
2016-03-08	126.589	0.508627	0.0127644	0.105235
TYSND1	98.3763	-0.632763	0.0127608	0.105235
MRPL37	368.697	-0.433437	0.0128027	0.105454
PMPCA	142.029	-0.462882	0.0128263	0.105454
RRP1	215.304	-0.572641	0.0128207	0.105454
SPTSSA	278.825	-0.480395	0.0128266	0.105454
POLD1	170.396	-0.672315	0.0128442	0.105526
TMEM150A	10.1399	0.784111	0.012868	0.105648
CMAHP	12.2106	0.742576	0.0128841	0.105651
MAFG-AS1	12.8931	-0.787666	0.0128862	0.105651
SRC	24.4612	0.658161	0.0129226	0.105876
HERC6	16.427	0.780258	0.0129386	0.105934
HDAC5	152.509	0.699896	0.0129518	0.105968
ZNF252P	110.779	0.432734	0.0129638	0.105993
CTBS	129.847	0.607677	0.0130161	0.106348
AARS	219.599	-0.470536	0.013106	0.106714
DZIP1	218.595	-0.602224	0.0130779	0.106714
GSPT1	936.971	-0.436187	0.0130814	0.106714
METRNL	19.8958	0.714985	0.013099	0.106714
NUTM2A-AS1	16.069	-0.731291	0.0131036	0.106714
ZWILCH	175.854	-0.443441	0.0131441	0.10695
JAZF1	29.0706	0.624001	0.0131633	0.10699
MS4A14	12.3609	0.776853	0.0131761	0.10699
RPAP1	118.431	-0.444273	0.0131744	0.10699
MRPL46	148.503	-0.445262	0.0132342	0.107389
CTD-2521M24.9	9.60716	0.788564	0.0133196	0.108007
PLA2G6	6.71335	0.793138	0.0133632	0.108287
GPR75-ASB3	22.0898	0.635065	0.0134331	0.10863
PPARA	35.0965	0.644973	0.0134316	0.10863
PSAP	649.933	0.646271	0.0134212	0.10863
RPS27	986.369	0.584584	0.0134456	0.108657
CFLAR-AS1	8.22187	0.785035	0.013527	0.109241
FTL	2184.92	-0.335408	0.0135472	0.109328
CST3	324.368	0.31741	0.01356	0.109357
POLR1B	149.251	-0.489706	0.0135711	0.109373
C7orf60	43.8602	0.670308	0.0135895	0.109446
GINS1	159.312	-0.529513	0.0136264	0.109669
CHAF1B	80.2317	-0.500439	0.0136921	0.110122
HSPA4	675.841	-0.389745	0.0137053	0.110154
SLC27A5	63.7991	-0.53403	0.0137417	0.110372
ZFYVE1	54.4865	0.641971	0.0137942	0.110708
ZNF688	26.663	0.657026	0.0138022	0.110708
C4orf32	48.6307	-0.58729	0.0139011	0.11135
CRIPAK	7.92328	0.781789	0.0138986	0.11135
SMAGP	12.8502	0.756201	0.013934	0.111538
LRRC20	23.649	-0.698033	0.0139597	0.111668
FBL	3506.18	-0.527598	0.0140081	0.111904
SDC2	125.457	0.426434	0.0140026	0.111904
PCNA	1204.38	-0.356026	0.0140179	0.111907
FAM133B	100.644	-0.491521	0.0140619	0.112107
NARS2	53.8801	-0.552077	0.0140577	0.112107
TRMT2A	72.1622	-0.546857	0.0141239	0.112525
LRPPRC	685.552	-0.307301	0.0141633	0.112763
COMMD9	131.185	-0.442797	0.0141916	0.112913
ISOC2	181.81	-0.434583	0.0142553	0.113344
CDC45	195.023	-0.519161	0.0142811	0.113473
GLRX3	170.46	-0.586319	0.014306	0.113592
HNRNPU	4234	-0.182882	0.0143249	0.113592
TRMT6	204.391	-0.431933	0.0143248	0.113592
AATF	287.238	-0.343012	0.01434	0.113635
LPAR6	65.7276	0.705797	0.0143707	0.113802
NCBP1	145.732	-0.464804	0.014423	0.11414
EVPL	8.24114	0.762204	0.0144346	0.114155
SF3A3	589.698	-0.33048	0.0144477	0.114183
SFMBT2	250.388	0.428195	0.0144637	0.114233
FBXW4	77.4796	0.488498	0.0144821	0.114303
SCRIB	99.5409	-0.443341	0.0144952	0.114329
GDF11	86.983	0.544021	0.014565	0.114727
URI1	521.466	-0.265433	0.0145594	0.114727
MKI67IP	361.091	-0.430338	0.0145986	0.114839
ZBED6	122.763	0.508091	0.0145968	0.114839
AKR1C2	41.0449	-0.685232	0.0146303	0.114997
UQCRC1	373.532	-0.354148	0.0146381	0.114997
IL10RB	523.216	0.306854	0.0146886	0.115256
LAGE3	216.87	-0.472249	0.0146906	0.115256
SULT1A1	12.2981	0.769645	0.0147626	0.115745
RNU4-2	15.845	0.783609	0.014823	0.116142
NDUFS8	209.689	-0.469894	0.01486	0.116354
ADAMTS5	8.13513	-0.782411	0.0149381	0.116442
FOS	70.031	0.758934	0.0149401	0.116442
MAML1	85.2893	0.504159	0.0149328	0.116442
PDCD5	360.726	-0.424963	0.0149218	0.116442
ZMYM2	206.133	0.406736	0.0149361	0.116442
ZNF521	766.587	0.44946	0.0149358	0.116442
ZNF585A	19.7664	0.695954	0.0148956	0.116442
TMEM127	111.793	0.552761	0.014975	0.116638
MRPS31P5	5.8934	0.78075	0.0150195	0.116907
MZT2B	983.316	-0.413414	0.0150467	0.117042
RPS6KC1	47.4277	0.523422	0.0151071	0.117435
NOL12	133.387	-0.486419	0.0151789	0.117916
PIM2	237.345	0.750545	0.0152629	0.11849
CCT5	296.665	-0.64376	0.015327	0.118832
SLC33A1	122.442	0.468684	0.0153267	0.118832
IFFO2	6.51953	0.775223	0.0154119	0.119412
C19orf48	133.817	-0.591427	0.0154574	0.119687
ANLN	238.43	-0.333613	0.0154959	0.119828
HN1L	193.585	-0.433563	0.0154896	0.119828
KLF5	46.9967	0.622248	0.0155602	0.120246
AC002454.1	66.5444	0.542146	0.0156012	0.120376
DCAF4	83.4238	-0.500073	0.0156046	0.120376
SKIL	199.963	0.561555	0.0156075	0.120376
ARHGEF7	97.1768	0.51428	0.0156255	0.120437
SERPINI1	18.4826	0.739881	0.0156459	0.120515
ANKRD16	20.0775	-0.757886	0.015667	0.1206
C12orf52	94.2434	-0.401412	0.0157529	0.121182
KIAA1147	103.607	0.523115	0.015774	0.121265
ACTL6A	146.849	-0.403086	0.0157919	0.121324
PCNX	217.561	0.354782	0.0158284	0.121526
BRPF3	34.6219	0.662034	0.015884	0.121553
METAP2	1754.04	-0.287063	0.0158936	0.121553
POLR3B	84.192	-0.533438	0.0158534	0.121553
TEAD4	61.4165	-0.655618	0.0158683	0.121553
ZNHIT6	139.322	-0.407403	0.0158838	0.121553
hsa-mir-8072	14.1336	0.766118	0.0158669	0.121553
CRLF3	143.21	0.527702	0.0159156	0.121643
C9orf89	43.8754	0.698966	0.0159975	0.122146
TMC8	115.202	-0.447084	0.0160021	0.122146
KDM5D	48.9958	0.621711	0.0160768	0.122637
EXD3	6.05549	0.772704	0.0161005	0.122739
CTD-2124B8.2	13.5659	-0.751272	0.0161701	0.12319
SIK3	68.5095	0.539032	0.0162136	0.123443
RP11-196G18.22	21.7805	0.711341	0.0162561	0.123686
SPR	67.3007	-0.529314	0.0162671	0.12369
P2RY6	31.4102	-0.67649	0.0163031	0.123885
VEGFA	71.1433	-0.516959	0.0163825	0.124409
FTSJ2	327.126	-0.349926	0.0164128	0.124559
C4orf27	152.444	-0.351441	0.0164727	0.124899
MAP3K3	103.348	0.476237	0.0164788	0.124899
XK	58.7583	0.596589	0.0165421	0.125299
SLC27A1	20.8574	0.665225	0.0165676	0.125412
RAB15	71.3276	0.473455	0.0165938	0.12553
AHSA2	69.8333	0.584512	0.016628	0.125708
INPP4B	91.4881	0.57752	0.0167172	0.126302
BCCIP	839.886	-0.438341	0.0167657	0.126346
C16orf13	163.602	-0.439525	0.0167344	0.126346
KPNB1	2270.25	-0.274694	0.0167465	0.126346
ZBTB2	53.18	-0.632306	0.0167631	0.126346
PCMT1	533.901	-0.408874	0.0168526	0.12692
DSN1	145.466	-0.397959	0.0168865	0.127095
TBX1	5.81407	0.762466	0.016932	0.127356
NLGN3	11.5284	0.734726	0.0169665	0.127534
HAUS6	137.822	-0.413923	0.0170079	0.127624
PSMD14	662.997	-0.475564	0.0170107	0.127624
TIMM23	170.976	-0.419466	0.0169932	0.127624
CAPN1	201.167	0.478109	0.0170815	0.128022
RREB1	314.441	0.576234	0.0170855	0.128022
ASNSD1	205.897	-0.524362	0.0171229	0.128145
LILRA2	205.705	-0.317979	0.0171235	0.128145
MFSD4	11.0727	0.7665	0.0171509	0.128269
HDAC2	1460.86	-0.290154	0.0172134	0.128492
LINC00662	75.9295	-0.52377	0.0172093	0.128492
WDR36	317.49	-0.381429	0.0172031	0.128492
AF131216.6	10.1408	0.756413	0.0172477	0.128505
PLD3	28.1624	0.608675	0.0172423	0.128505
TMEM167B	154.673	0.372865	0.0172351	0.128505
FAM64A	13.1406	-0.760555	0.0172831	0.128688
DNAJC27	25.6583	0.706401	0.0173085	0.128766
STAT2	55.584	0.5647	0.0173153	0.128766
CYTIP	90.0835	0.561801	0.017394	0.12927
ATP6V0A1	107.416	0.464037	0.0174257	0.129425
INO80D	249.22	0.456757	0.0174463	0.129497
CHRNA5	19.1393	-0.757615	0.0174611	0.129525
CALR	1318.05	-0.62481	0.0175409	0.129769
CASC4	142.385	0.362812	0.0175472	0.129769
EIF4E2	594.858	-0.300419	0.0175487	0.129769
MSL1	604.921	-0.238718	0.0175284	0.129769
NSMCE4A	185.887	-0.461095	0.0175433	0.129769
SEC24D	112.353	-0.478633	0.0176159	0.130184
XRCC6	761.765	-0.488039	0.0176334	0.130232
DHRS1	116.519	0.596144	0.0178312	0.13161
TLR1	36.0278	0.56044	0.0178733	0.131839
MADD	84.088	0.469126	0.0179001	0.131892
NRD1	339.091	-0.295384	0.0179028	0.131892
GFM1	395.073	-0.291144	0.0179808	0.132385
DHX58	13.3517	0.745759	0.0180428	0.132759
ABCC5	187.437	-0.471212	0.0180876	0.133005
EXOSC2	137.059	-0.542876	0.0181137	0.133115
FAM122C	8.43576	0.736344	0.0181631	0.133395
HMGCR	293.89	-0.462976	0.018259	0.134016
COG4	55.9308	0.522945	0.0183043	0.134266
RTP4	25.0625	0.6342	0.0183422	0.13446
RP4-569M23.4	6.27663	0.753268	0.0183626	0.134527
MXRA7	25.8584	0.614005	0.0183895	0.134641
ANAPC1	42.8745	-0.542726	0.0184785	0.134756
GMCL1	285.871	-0.349895	0.018457	0.134756
OR7E38P	43.2005	-0.565717	0.0184878	0.134756
PAICS	790.457	-0.471273	0.018466	0.134756
RBKS	54.6822	0.545648	0.018466	0.134756
SLC37A3	6.92303	0.755049	0.0184964	0.134756
SURF6	368.728	-0.311733	0.0184755	0.134756
TANC1	23.3643	0.717345	0.0184527	0.134756
UBA7	37.6025	0.636342	0.0185207	0.134851
BYSL	207.858	-0.559396	0.0185917	0.135284
TBC1D9B	123.71	0.376521	0.0186422	0.135568
MT-ND4L	1420.73	0.304367	0.0187114	0.135988
C11orf82	58.0203	-0.659813	0.0187579	0.136242
C1orf159	14.0668	-0.686557	0.0188007	0.136264
EIF4EBP1	138.267	-0.600327	0.0187843	0.136264
KCNC4	14.3578	0.687252	0.0187855	0.136264
SSBP1	1424.24	-0.490687	0.018807	0.136264
PPA1	349.09	-0.378786	0.0188686	0.136627
ALG8	185.102	-0.423866	0.0189275	0.136894
GATAD2A	376.697	-0.268714	0.0189285	0.136894
KDM4C	54.5465	0.52119	0.0190132	0.137422
PLAC8	1929.27	-0.457739	0.0190415	0.137543
LPCAT1	236.779	-0.376625	0.0190588	0.137584
ATHL1	19.7675	0.671093	0.0192154	0.138553
IFI35	34.1842	0.665033	0.0192166	0.138553
PACSIN2	152.491	0.319843	0.019268	0.13884
AP1S2	341.776	0.296315	0.0192907	0.138918
SNRPG	394.702	-0.464138	0.0193023	0.138918
ZBED4	208.952	-0.424939	0.0193167	0.138937
ADPRHL2	123.284	-0.525274	0.0193738	0.139159
FAM81A	40.804	-0.614107	0.0193718	0.139159
PHOSPHO2	14.7088	-0.732073	0.0193828	0.139159
C16orf45	5.89236	0.747495	0.0194368	0.139462
PAK1IP1	189.729	-0.596402	0.0194988	0.139822
FAM210B	71.3263	0.500826	0.0195581	0.140163
EXOSC9	186.989	-0.395888	0.0195825	0.140252
ARID4B	658.544	0.359432	0.0196231	0.140458
CAPZA1	1108.18	0.425831	0.0196585	0.140627
RUVBL2	204.853	-0.567951	0.0196865	0.140742
THOP1	287.342	-0.451425	0.0197035	0.140779
CENPB	404.698	-0.346518	0.0197751	0.140996
DNAJC3-AS1	21.9331	0.658859	0.0197669	0.140996
PSMB7	994.785	-0.350287	0.0197894	0.140996
RP11-228B15.4	7.07783	0.742398	0.0197935	0.140996
SPDL1	239.595	-0.383895	0.0197931	0.140996
LASP1	29.656	0.610061	0.0198386	0.141232
AKAP10	135.401	0.55571	0.0198991	0.14153
CASZ1	10.6517	0.709896	0.0199044	0.14153
DOCK6	16.1422	0.715436	0.0199513	0.141683
DRG1	238.565	-0.466414	0.0199856	0.141683
FAM136A	257.774	-0.381118	0.0199815	0.141683
RP4-604A21.1	96.1657	0.633319	0.0199506	0.141683
TMEM261	331.025	-0.459946	0.0199836	0.141683
CCDC34	355.291	-0.583395	0.0200598	0.141784
NSUN5	306.558	-0.53397	0.0200295	0.141784
SCD	643.871	-0.677543	0.0200372	0.141784
ZNF230	24.6818	-0.619164	0.0200547	0.141784
ZNF69	10.7359	0.73066	0.0200577	0.141784
ITPRIP	12.5297	0.744362	0.0202961	0.14329
RNF111	86.7804	0.530918	0.0202977	0.14329
SMC2	768.212	-0.39493	0.0203092	0.14329
LRPAP1	354.304	-0.462523	0.0205136	0.144646
DRAM1	54.1037	-0.591934	0.0205291	0.144669
ARIH2	405.444	-0.28673	0.0206733	0.145455
FAM200A	23.501	0.662945	0.0206775	0.145455
GLRX2	159.161	-0.390882	0.0206635	0.145455
PTGIR	11.0142	-0.722694	0.0207043	0.145557
GZF1	36.6879	-0.552516	0.0207348	0.145685
FBXL19	101.724	-0.6122	0.0207829	0.145889
MRPL11	331.479	-0.431632	0.02079	0.145889
PGRMC2	345.551	-0.490695	0.0208131	0.145889
PLEKHH3	8.45569	0.725542	0.0208099	0.145889
CHAC2	31.2927	-0.685071	0.0208618	0.146058
PPP3CA	877.95	0.288992	0.0208497	0.146058
TIGD5	51.1917	-0.487757	0.0210033	0.146961
COMMD6	763.137	0.61598	0.021158	0.14762
ECHDC2	56.1438	0.488377	0.0211598	0.14762
JAK3	24.6299	0.662697	0.0211253	0.14762
WDHD1	144.309	-0.463557	0.0211453	0.14762
XRCC5	1842.84	-0.252246	0.0211485	0.14762
PDDC1	136.247	-0.382063	0.021201	0.14782
TPP1	343.819	0.39907	0.021239	0.147998
CHSY1	599.582	0.275699	0.0213048	0.148282
DUSP2	51.1044	-0.522632	0.0212929	0.148282
C11orf83	87.8874	-0.472629	0.0214069	0.148841
CPNE1	273.072	-0.369826	0.0215016	0.148841
GBP4	23.8034	0.586274	0.0214341	0.148841
GSTP1	2969.04	-0.4085	0.0215347	0.148841
IP6K1	87.4457	0.473749	0.021471	0.148841
MFSD1	775.35	-0.362245	0.021536	0.148841
NEK2	229.735	-0.335978	0.0214734	0.148841
NR3C1	295.198	0.388193	0.0214676	0.148841
RP11-73E17.2	144.242	0.392381	0.0214651	0.148841
TP63	21.5502	0.70574	0.021491	0.148841
TPT1-AS1	14.4628	0.692658	0.0215319	0.148841
TYW3	493.139	-0.317189	0.0215262	0.148841
HJURP	220.653	-0.353498	0.0215601	0.148899
MEF2C	2534.87	0.32945	0.0215695	0.148899
KIF1B	28.8213	-0.621449	0.0215828	0.148904
TMEM18	56.5863	0.640112	0.021605	0.14897
TRIM45	9.8437	0.724407	0.0216633	0.149285
TRIP4	82.344	0.514132	0.0217302	0.149659
AP1S3	185.454	-0.548683	0.0217794	0.149761
CDKN2AIP	208.302	0.355444	0.021783	0.149761
PSMG4	151.211	-0.575445	0.0217825	0.149761
ABTB1	29.0844	0.719509	0.0218983	0.150379
STARD4	55.5584	-0.512956	0.0218983	0.150379
PITPNM2	15.3628	0.712967	0.0219384	0.150567
BRAF	74.6536	0.597392	0.0219755	0.15071
CLN8	62.7104	0.541307	0.0219846	0.15071
NEXN	203.696	-0.427318	0.0220215	0.150788
TCTA	35.0912	0.548048	0.0220112	0.150788
TGFBRAP1	183.488	-0.293738	0.0220461	0.150869
FAM160B1	57.2761	0.547279	0.0220747	0.150892
IKBIP	187.208	-0.381324	0.022075	0.150892
TBC1D32	20.0487	0.685619	0.0220999	0.150975
FCER1G	106.083	0.714243	0.0221229	0.151045
CYTH1	131.466	0.502539	0.0222037	0.15151
MZT2A	340.791	-0.385871	0.0223001	0.151643
PARP9	45.1338	0.538721	0.0222921	0.151643
PCM1	1193.75	0.524578	0.0222422	0.151643
PIP5K1C	23.2842	0.619715	0.0222789	0.151643
RIOK1	253.509	-0.393691	0.0222995	0.151643
ZNF121	284.851	-0.334739	0.0222878	0.151643
MOAP1	53.8669	0.477416	0.0223179	0.151677
PTPN14	16.8033	0.719124	0.0223627	0.151894
REEP3	108.4	0.355303	0.02245	0.1524
ZCCHC7	118.398	0.551181	0.0224856	0.152554
ZBTB24	140.987	-0.400303	0.0225417	0.152847
DROSHA	209.936	-0.359153	0.0225557	0.152855
HLA-DRB1	55.855	0.481848	0.02259	0.152912
ZNF117	50.1316	0.624113	0.0225808	0.152912
MDM4	681.442	0.283067	0.0226261	0.152982
SFXN2	38.1777	-0.651616	0.0226216	0.152982
CELF2-AS1	22.9198	0.732298	0.0226714	0.1532
SF3B3	636.58	-0.395397	0.0226883	0.153227
ANKS6	49.5687	-0.537387	0.0227193	0.153349
FARSA	817.103	-0.643458	0.0227833	0.153518
MGAT5	138.85	0.489072	0.0227611	0.153518
ZNF493	39.0141	0.617291	0.0227812	0.153518
SENP6	728.038	0.506482	0.0228086	0.153601
TIMM22	92.0073	-0.477706	0.0228368	0.153703
PPIL1	169.576	-0.556328	0.0228642	0.153801
ADAM17	26.4657	0.710452	0.0228988	0.153862
KDM6B	80.9154	0.550069	0.0228994	0.153862
GLA	79.1052	-0.458691	0.0229641	0.15421
HSPBP1	242.549	-0.434531	0.022979	0.154222
CCDC50	243.14	0.402993	0.0230268	0.154368
FAM214A	41.4466	0.704002	0.0230146	0.154368
CASP3	137.792	0.412165	0.0231244	0.154461
CLEC4E	7.81302	-0.711798	0.0230623	0.154461
DDX58	58.9043	0.537294	0.0231551	0.154461
HHAT	22.0994	0.624422	0.0231527	0.154461
MAU2	136.672	0.401683	0.0231581	0.154461
MFSD10	974.427	-0.388721	0.0231416	0.154461
NDUFAF4	167.351	-0.525674	0.0231286	0.154461
PIK3CA	116.97	0.443115	0.0230683	0.154461
RRAGB	30.1264	0.553046	0.0230943	0.154461
APOL6	123.331	0.458873	0.02324	0.154498
CYB5D1	32.9554	-0.563316	0.0231874	0.154498
DEPDC1B	218.383	-0.354647	0.0232156	0.154498
ENTPD4	114.137	0.396343	0.0232418	0.154498
ESF1	736.49	-0.318146	0.0232328	0.154498
SUB1	1736.61	-0.197051	0.0232006	0.154498
SDAD1P1	15.1035	0.730134	0.0232774	0.154647
C4orf46	212.902	-0.488711	0.0233417	0.154988
TUFM	892.083	-0.417529	0.0233711	0.155095
RP5-882C2.2	43.5847	0.535976	0.0234207	0.155337
PRKCE	17.6441	0.650582	0.0234933	0.155732
POLR1E	98.565	-0.64965	0.0235333	0.15591
ZFP14	40.8217	0.614851	0.0235624	0.15601
ZNF160	45.3106	0.565064	0.0235749	0.15601
DDX24	741.977	-0.470165	0.0236424	0.156141
F2RL2	7.54517	0.723749	0.0236211	0.156141
FAM57A	72.5864	-0.486227	0.0236473	0.156141
TRAPPC9	70.3699	0.463537	0.0236346	0.156141
KIAA1524	186.95	-0.426996	0.0236707	0.156208
AMPD3	71.6618	0.467109	0.0237211	0.156329
MRPS28	275.24	-0.332079	0.0237199	0.156329
TP73-AS1	16.6904	0.684494	0.0237286	0.156329
ZNF789	26.2763	0.59356	0.0237422	0.156331
FANCE	77.4329	-0.442907	0.0237616	0.156347
TXLNG	133.764	-0.539913	0.0237709	0.156347
BCAS4	19.8142	0.706235	0.0238476	0.156533
MAOA	9.79851	-0.726352	0.0238504	0.156533
THUMPD3	136.26	-0.410198	0.0238521	0.156533
YEATS4	531.917	-0.356554	0.02384	0.156533
WNK1	955.263	0.419747	0.0239466	0.157066
ARHGAP12	25.927	0.547053	0.0240272	0.157507
EVA1B	16.846	0.640804	0.0240648	0.157666
PNISR	1283.03	0.438319	0.0241776	0.158318
MDN1	781.418	-0.41869	0.0242912	0.158974
IGIP	9.20216	0.723241	0.0243185	0.159059
NUP88	296.417	-0.383928	0.0243311	0.159059
LYZ	28.4897	-0.725373	0.0243515	0.159104
ZFP41	23.5714	-0.584519	0.0244303	0.159532
SRSF3	2051.88	-0.335601	0.0244565	0.159536
TOMM20	946.081	-0.227571	0.024458	0.159536
AUNIP	35.1509	-0.627666	0.0245206	0.159828
HAGHL	120.392	-0.432685	0.0245298	0.159828
CDC6	288.165	-0.427093	0.024565	0.15997
UBAP2L	320.525	-0.287494	0.0246579	0.160486
METTL2B	77.639	-0.588543	0.0247085	0.160727
C2orf69	181.226	-0.291165	0.0247742	0.161066
HEBP2	544.413	-0.476473	0.0248499	0.16147
MTMR9	186.785	0.383277	0.0249751	0.162194
RXRA	123.427	0.414174	0.025039	0.16252
KCNH2	8.35348	-0.711508	0.0251657	0.163253
CCNB2	242.067	-0.360438	0.0251932	0.163342
MRP63	362.029	-0.306984	0.0252097	0.16336
CDKN3	111.381	-0.443276	0.0252263	0.163378
UBAP2	320.715	-0.465074	0.0252552	0.163475
UTP15	63.0143	-0.481708	0.0253483	0.163988
C7orf49	8.50844	0.713536	0.0253781	0.164091
FURIN	59.5765	0.704266	0.0254408	0.164404
PLEKHM1	42.6047	0.595923	0.0254542	0.164404
SRP14-AS1	18.0904	0.626248	0.0254883	0.164534
ARMC6	97.149	-0.482303	0.0255867	0.16501
TIMELESS	282.859	-0.426258	0.0255898	0.16501
BAZ2B	450.533	0.43456	0.0256375	0.165227
C12orf29	142.389	-0.561539	0.0256583	0.165272
CTC-241F20.3	78.5653	0.535943	0.0257028	0.165468
FDXR	149.201	-0.510853	0.0257375	0.165601
MRTO4	406.885	-0.652876	0.0257907	0.165853
MAP1LC3A	14.0088	0.716445	0.0258155	0.165923
PPM1M	28.3802	0.636096	0.0258371	0.165972
RP11-285F7.2	63.9799	0.680817	0.0258584	0.166018
IPO5	673.424	-0.277625	0.0259782	0.166678
MALT1	63.6729	0.61555	0.0259998	0.166678
UTP23	262.788	-0.38072	0.0260034	0.166678
COQ4	92.4301	-0.427491	0.0260632	0.166971
PPP2R2A	537.143	-0.288912	0.0261222	0.167258
RP11-203B9.4	19.9374	0.677372	0.0261718	0.167485
ACSS2	34.0523	0.565845	0.0262402	0.167711
NBEAL2	81.3862	0.563018	0.026241	0.167711
PROSER2	159.692	0.415539	0.0262495	0.167711
PPP2R5C	492.185	0.318154	0.0262641	0.167713
EXOC3	193.054	0.373975	0.026296	0.167827
NCDN	44.2037	-0.596402	0.0263252	0.167904
TAF7	650.209	0.297636	0.0263438	0.167904
ZCCHC24	9.83919	0.709224	0.0263506	0.167904
SLC29A2	34.5522	-0.65508	0.0264858	0.168674
PHF12	83.932	0.460593	0.0266084	0.169364
FAF2	234.255	0.305876	0.0266775	0.169621
MRPL21	298.886	-0.384743	0.0266634	0.169621
SOGA1	54.0616	-0.500951	0.0267463	0.169967
DOPEY2	87.838	-0.468535	0.0267769	0.169984
PIGP	78.6541	0.457084	0.0267777	0.169984
MAK16	270.672	-0.44007	0.0268078	0.170084
ARHGEF11	55.3502	0.456433	0.0268421	0.170211
TCF12	154.25	0.432537	0.0269838	0.170955
ZFAS1	1893.44	0.565939	0.0269884	0.170955
ZER1	31.2161	0.534258	0.0270415	0.1712
CDYL	123.231	0.408958	0.0270761	0.171328
DNPEP	121.23	-0.385533	0.0270969	0.171368
GPATCH2L	219.199	0.411091	0.02712	0.171422
BST2	163.834	0.423325	0.0271991	0.171605
LACC1	38.7027	0.531669	0.0272055	0.171605
RSAD1	137.53	-0.444844	0.0271747	0.171605
WNT6	27.7956	-0.558418	0.0272069	0.171605
LINC00528	14.6495	0.701469	0.027307	0.172144
MT2A	93.517	-0.517098	0.0273513	0.172332
EFCAB7	13.2436	0.706277	0.0273956	0.172519
C15orf39	51.9026	0.5506	0.0275868	0.173539
PLEKHA5	57.0792	0.601047	0.0275853	0.173539
EPHB2	22.9372	0.697779	0.0276596	0.173812
PET117	66.261	-0.454964	0.0276541	0.173812
MRPS16	309.988	-0.392908	0.0277003	0.173888
RET	8.85246	-0.702025	0.0277011	0.173888
DUS2	45.2628	-0.50108	0.0277537	0.174126
NUDC	396.696	-0.313925	0.0278088	0.17438
FAM126A	139.475	0.347218	0.0278732	0.174598
ZNF7	46.357	-0.654601	0.0278721	0.174598
GIPC3	18.9273	0.642837	0.0279546	0.174883
GNG7	6.66218	0.703485	0.027963	0.174883
INPP5B	15.6927	0.707204	0.0279447	0.174883
EIF3B	905.165	-0.381231	0.0280041	0.175048
PDE12	116.613	-0.348933	0.0280238	0.175078
GRINA	563.683	0.436863	0.0280538	0.175174
TCF7L2	89.8635	0.48394	0.0281131	0.175451
MUC1	9.37259	0.699286	0.0282329	0.176071
OSTM1	106.751	0.440016	0.0282421	0.176071
C1orf132	51.6999	0.536425	0.0282927	0.176201
FAM172A	174.645	0.491729	0.0282877	0.176201
SOCS7	11.8641	-0.690845	0.0283522	0.176478
GTF3C4	283.14	-0.256302	0.0283907	0.176625
CEBPE	42.5904	-0.686644	0.0285216	0.177167
PGM1	129.186	-0.388226	0.0285227	0.177167
PRPF19	726.746	-0.39753	0.0284967	0.177167
KIAA1468	54.4946	0.487476	0.028568	0.177355
CTSF	8.00458	0.702242	0.0287068	0.177913
NARS	760.739	-0.425372	0.028718	0.177913
QPRT	82.2686	0.394363	0.0286948	0.177913
SEMA3G	29.1415	-0.606868	0.0286781	0.177913
MOV10	35.5772	0.562904	0.0287693	0.178138
LINC00641	26.2679	0.560913	0.0288032	0.178217
MKNK2	369.43	-0.281931	0.0288272	0.178217
PPM1K	110.595	0.399973	0.0288188	0.178217
UQCRQ	1074.08	-0.313027	0.0288831	0.1784
VDR	67.314	-0.474394	0.028887	0.1784
PPP2R1B	104.367	-0.476835	0.0289657	0.178793
CSNK1D	217.702	0.37539	0.0289817	0.178798
APOA1BP	249.955	-0.394223	0.0290674	0.179047
CDK14	64.6548	-0.500185	0.0290625	0.179047
FAM103A1	26.3241	0.646143	0.0290472	0.179047
GINS2	120.159	-0.375202	0.0290871	0.179075
ATF7IP2	82.1588	0.500256	0.0291305	0.179249
TPRKB	230.736	-0.306011	0.0291679	0.179386
WHSC1	640.547	-0.3561	0.0291931	0.179448
HOTAIRM1	79.0635	0.659805	0.0292666	0.179807
DPYSL3	10.6008	0.695186	0.0293232	0.180061
FADS3	11.9728	0.647959	0.0293401	0.180071
LY9	80.6843	0.500832	0.029443	0.180609
ANKRD18A	117.51	-0.547671	0.0294631	0.180639
RP11-305O4.1	6.46076	0.697705	0.0295418	0.180881
SWI5	30.1087	0.51654	0.0295484	0.180881
UBL4A	117.891	-0.565968	0.0295282	0.180881
APRT	473.986	-0.419194	0.0296485	0.1814
ANKRD12	499.881	0.389451	0.0297185	0.181734
DENND2C	7.39942	0.694027	0.0297623	0.18186
SIKE1	130.152	0.358396	0.0297852	0.18186
SLC27A3	37.8343	0.605176	0.0297774	0.18186
TCP11L2	12.585	0.695137	0.0298926	0.182422
FAM207A	118.56	-0.420715	0.0299279	0.182543
HIST1H2BN	14.7026	0.648657	0.0299721	0.182719
TIMM17A	584.599	-0.369805	0.0300293	0.182973
KNSTRN	120.649	-0.448256	0.0300909	0.183254
SOCS2-AS1	43.7994	0.645078	0.03018	0.183702
GPBP1	516.537	0.210075	0.030242	0.183985
CCNE1	104.637	-0.36097	0.0302819	0.184133
C5orf24	247.899	0.466747	0.0303732	0.184594
AHNAK2	24.4591	0.570713	0.0305237	0.185413
RNF130	148.047	0.593841	0.0305448	0.185446
LRRFIP1	1259.93	-0.480448	0.0306844	0.186198
RANGAP1	597.328	-0.525058	0.0307006	0.186201
KLF2	13.5423	0.695489	0.0307325	0.186299
ZNF695	44.1622	-0.563962	0.0307741	0.186456
OAF	181.303	-0.37614	0.0308056	0.186551
RRAGD	329.031	-0.273004	0.0308386	0.186655
KIF4A	175.57	-0.338336	0.0309432	0.187193
SNX20	86.2012	0.520802	0.0310478	0.18773
KIF2C	309.623	-0.338327	0.0311828	0.18845
RPS6KB1	215.485	-0.417112	0.0312323	0.188573
SOD2	139.423	-0.384991	0.031235	0.188573
ASS1	83.4168	-0.542112	0.0312743	0.188679
FRG1B	99.86	0.384294	0.0312845	0.188679
ABCD4	43.8264	0.533425	0.0313893	0.189119
AEN	270.42	-0.478749	0.0313815	0.189119
TOP2B	2023.31	0.200691	0.0314177	0.189194
LDLR	279.753	-0.564168	0.0315079	0.18964
C21orf59	173.846	-0.38827	0.0315574	0.189674
DLEU1	48.2756	-0.481646	0.0315616	0.189674
TMCO3	67.3356	0.460004	0.0315339	0.189674
RFX8	67.834	0.591944	0.03159	0.189748
MYC	651.525	-0.620027	0.0316261	0.189869
WDR18	595.056	-0.531704	0.0316596	0.189974
ACSM3	6.72853	-0.692171	0.0316894	0.189986
MRPL27	467.267	-0.418172	0.0316937	0.189986
RAB7L1	292.306	-0.305408	0.0317414	0.190176
CCP110	185.366	-0.409555	0.0317689	0.190244
CENPQ	301.504	-0.386936	0.0318141	0.190339
KRBOX4	27.7529	0.564189	0.031817	0.190339
FAM109A	7.36957	0.682761	0.0318499	0.190357
MYLIP	95.7674	0.466049	0.0318522	0.190357
AP000254.8	12.0013	-0.657572	0.0319903	0.191021
DARS2	213.772	-0.450217	0.0319956	0.191021
LNPEP	132.284	0.558991	0.0320222	0.191084
CPT1A	937.085	-0.371425	0.0320407	0.191098
C18orf54	37.8256	-0.599216	0.0320754	0.191125
RPL39L	320.645	-0.425185	0.0320775	0.191125
CAT	1066.53	-0.370176	0.0322031	0.191777
CMTM7	281.84	-0.532762	0.0322432	0.191919
BDH2	29.2803	0.638444	0.0323236	0.192239
CCDC71L	65.5862	0.570526	0.0323306	0.192239
IL13RA1	76.6035	0.407428	0.0324174	0.192239
MIR155HG	35.52	0.521976	0.0323963	0.192239
NAF1	96.8056	-0.418201	0.0323622	0.192239
RP1-102H19.8	17.12	0.651942	0.032424	0.192239
SMARCA4	713.83	-0.270541	0.0323487	0.192239
TSPO	894.726	-0.31772	0.0324269	0.192239
MRPL33	3161.2	0.312751	0.0324604	0.192341
[truncated: 53,767 more rows]

## Sheet: OCIAML2_GSEA_report_down
Data S2, related to Figure 4: Transcriptome and chromatin accessibility profiling.
NAME	GS<br> follow link to MSigDB	GS DETAILS	SIZE	ES	NES	NOM p-val	FDR q-val	FWER p-val	RANK AT MAX	LEADING EDGE
MANALO_HYPOXIA_DN	MANALO_HYPOXIA_DN	Details ...	281	-0.794292	-3.19845	0	0	0	4358	tags=77%, list=14%, signal=88%
KRIGE_RESPONSE_TO_TOSEDOSTAT_24HR_DN	KRIGE_RESPONSE_TO_TOSEDOSTAT_24HR_DN	Details ...	951	-0.698584	-3.05447	0	0	0	4686	tags=65%, list=15%, signal=74%
HALLMARK_MYC_TARGETS_V1	HALLMARK_MYC_TARGETS_V1	Details ...	199	-0.780693	-3.00363	0	0	0	4567	tags=72%, list=15%, signal=84%
CAIRO_HEPATOBLASTOMA_CLASSES_UP	CAIRO_HEPATOBLASTOMA_CLASSES_UP	Details ...	583	-0.694456	-2.98632	0	0	0	4526	tags=60%, list=14%, signal=68%
HALLMARK_E2F_TARGETS	HALLMARK_E2F_TARGETS	Details ...	199	-0.753125	-2.93971	0	0	0	4043	tags=71%, list=13%, signal=81%
GSE22886_UNSTIM_VS_IL2_STIM_NKCELL_DN	GSE22886_UNSTIM_VS_IL2_STIM_NKCELL_DN	Details ...	194	-0.764231	-2.93879	0	0	0	3633	tags=73%, list=12%, signal=82%
GSE21927_SPLEEN_C57BL6_VS_EL4_TUMOR_BALBC_MONOCYTES_DN	GSE21927_SPLEEN_C57BL6_VS_EL4_TUMOR_BALBC_MONOCYTES_DN	Details ...	194	-0.756183	-2.93852	0	0	0	5038	tags=75%, list=16%, signal=88%
MORF_BUB3	MORF_BUB3	Details ...	275	-0.727372	-2.93105	0	0	0	5606	tags=73%, list=18%, signal=88%
LEE_BMP2_TARGETS_DN	LEE_BMP2_TARGETS_DN	Details ...	838	-0.67437	-2.93014	0	0	0	4453	tags=59%, list=14%, signal=67%
GNF2_RRM1	GNF2_RRM1	Details ...	87	-0.832426	-2.89555	0	0	0	3428	tags=80%, list=11%, signal=90%
GSE24634_TREG_VS_TCONV_POST_DAY5_IL4_CONVERSION_UP	GSE24634_TREG_VS_TCONV_POST_DAY5_IL4_CONVERSION_UP	Details ...	193	-0.734035	-2.8743	0	0	0	4036	tags=66%, list=13%, signal=75%
SOTIRIOU_BREAST_CANCER_GRADE_1_VS_3_UP	SOTIRIOU_BREAST_CANCER_GRADE_1_VS_3_UP	Details ...	147	-0.777956	-2.87257	0	0	0	4017	tags=77%, list=13%, signal=88%
GNF2_SMC4L1	GNF2_SMC4L1	Details ...	84	-0.811941	-2.87082	0	0	0	3428	tags=75%, list=11%, signal=84%
GSE22886_UNSTIM_VS_IL15_STIM_NKCELL_DN	GSE22886_UNSTIM_VS_IL15_STIM_NKCELL_DN	Details ...	194	-0.745247	-2.86288	0	0	0	4257	tags=74%, list=14%, signal=85%
ZHOU_CELL_CYCLE_GENES_IN_IR_RESPONSE_24HR	ZHOU_CELL_CYCLE_GENES_IN_IR_RESPONSE_24HR	Details ...	121	-0.768394	-2.85986	0	0	0	4113	tags=71%, list=13%, signal=81%
PENG_LEUCINE_DEPRIVATION_DN	PENG_LEUCINE_DEPRIVATION_DN	Details ...	182	-0.737586	-2.84745	0	0	0	4178	tags=66%, list=13%, signal=76%
ROSTY_CERVICAL_CANCER_PROLIFERATION_CLUSTER	ROSTY_CERVICAL_CANCER_PROLIFERATION_CLUSTER	Details ...	137	-0.749052	-2.84683	0	0	0	4073	tags=75%, list=13%, signal=86%
DUTERTRE_ESTRADIOL_RESPONSE_24HR_UP	DUTERTRE_ESTRADIOL_RESPONSE_24HR_UP	Details ...	310	-0.699784	-2.84285	0	0	0	4265	tags=65%, list=14%, signal=74%
GSE18893_TCONV_VS_TREG_24H_TNF_STIM_UP	GSE18893_TCONV_VS_TREG_24H_TNF_STIM_UP	Details ...	192	-0.727881	-2.84033	0	0	0	5804	tags=76%, list=18%, signal=92%
GSE16450_IMMATURE_VS_MATURE_NEURON_CELL_LINE_DN	GSE16450_IMMATURE_VS_MATURE_NEURON_CELL_LINE_DN	Details ...	178	-0.746899	-2.83606	0	0	0	3897	tags=66%, list=12%, signal=75%
PENG_GLUTAMINE_DEPRIVATION_DN	PENG_GLUTAMINE_DEPRIVATION_DN	Details ...	323	-0.683635	-2.83584	0	0	0	4192	tags=63%, list=13%, signal=72%
PENG_RAPAMYCIN_RESPONSE_DN	PENG_RAPAMYCIN_RESPONSE_DN	Details ...	237	-0.723013	-2.83577	0	0	0	4985	tags=68%, list=16%, signal=80%
GSE5679_CTRL_VS_PPARG_LIGAND_ROSIGLITAZONE_TREATED_DC_UP	GSE5679_CTRL_VS_PPARG_LIGAND_ROSIGLITAZONE_TREATED_DC_UP	Details ...	192	-0.735897	-2.83441	0	0	0	4642	tags=71%, list=15%, signal=83%
ZHANG_TLX_TARGETS_60HR_DN	ZHANG_TLX_TARGETS_60HR_DN	Details ...	267	-0.708339	-2.83177	0	0	0	4125	tags=67%, list=13%, signal=76%
MORF_RFC4	MORF_RFC4	Details ...	149	-0.756232	-2.83075	0	0	0	5505	tags=76%, list=18%, signal=91%
WONG_EMBRYONIC_STEM_CELL_CORE	WONG_EMBRYONIC_STEM_CELL_CORE	Details ...	329	-0.690058	-2.83008	0	0	0	5324	tags=67%, list=17%, signal=80%
GNF2_RAN	GNF2_RAN	Details ...	84	-0.808722	-2.82176	0	0	0	3097	tags=74%, list=10%, signal=82%
GSE22886_NAIVE_CD4_TCELL_VS_12H_ACT_TH1_DN	GSE22886_NAIVE_CD4_TCELL_VS_12H_ACT_TH1_DN	Details ...	193	-0.725162	-2.8177	0	0	0	5299	tags=70%, list=17%, signal=84%
GNF2_PCNA	GNF2_PCNA	Details ...	67	-0.828115	-2.80699	0	0	0	3528	tags=81%, list=11%, signal=91%
CROONQUIST_IL6_DEPRIVATION_DN	CROONQUIST_IL6_DEPRIVATION_DN	Details ...	97	-0.787286	-2.80086	0	0	0	4017	tags=77%, list=13%, signal=88%
GSE5679_CTRL_VS_RARA_AGONIST_AM580_TREATED_DC_UP	GSE5679_CTRL_VS_RARA_AGONIST_AM580_TREATED_DC_UP	Details ...	193	-0.718738	-2.79725	0	0	0	4705	tags=66%, list=15%, signal=78%
GNF2_PA2G4	GNF2_PA2G4	Details ...	78	-0.80038	-2.79596	0	0	0	4321	tags=81%, list=14%, signal=93%
GSE21546_WT_VS_ELK1_KO_ANTI_CD3_STIM_DP_THYMOCYTES_DN	GSE21546_WT_VS_ELK1_KO_ANTI_CD3_STIM_DP_THYMOCYTES_DN	Details ...	176	-0.718927	-2.78909	0	0	0	4184	tags=63%, list=13%, signal=72%
MORF_EIF3S2	MORF_EIF3S2	Details ...	242	-0.702063	-2.78712	0	0	0	5505	tags=69%, list=18%, signal=83%
SCHUHMACHER_MYC_TARGETS_UP	SCHUHMACHER_MYC_TARGETS_UP	Details ...	77	-0.806101	-2.78382	0	0	0	2184	tags=64%, list=7%, signal=68%
MORF_RRM1	MORF_RRM1	Details ...	101	-0.774711	-2.77489	0	0	0	5505	tags=78%, list=18%, signal=95%
MORF_SOD1	MORF_SOD1	Details ...	274	-0.698264	-2.77374	0	0	0	5592	tags=66%, list=18%, signal=80%
HALLMARK_MYC_TARGETS_V2	HALLMARK_MYC_TARGETS_V2	Details ...	58	-0.841531	-2.7729	0	0	0	3716	tags=88%, list=12%, signal=100%
WINNEPENNINCKX_MELANOMA_METASTASIS_UP	WINNEPENNINCKX_MELANOMA_METASTASIS_UP	Details ...	156	-0.721038	-2.76769	0	0	0	4705	tags=69%, list=15%, signal=81%
MODULE_54	MODULE_54	Details ...	248	-0.703511	-2.76727	0	0	0	4017	tags=63%, list=13%, signal=72%
SCHLOSSER_MYC_TARGETS_REPRESSED_BY_SERUM	SCHLOSSER_MYC_TARGETS_REPRESSED_BY_SERUM	Details ...	155	-0.725974	-2.76336	0	0	0	5324	tags=72%, list=17%, signal=87%
WEI_MYCN_TARGETS_WITH_E_BOX	WEI_MYCN_TARGETS_WITH_E_BOX	Details ...	741	-0.643931	-2.76026	0	0	0	4508	tags=57%, list=14%, signal=65%
MORF_DNMT1	MORF_DNMT1	Details ...	115	-0.747278	-2.75888	0	0	0	4567	tags=72%, list=15%, signal=84%
GSE36476_CTRL_VS_TSST_ACT_40H_MEMORY_CD4_TCELL_YOUNG_DN	GSE36476_CTRL_VS_TSST_ACT_40H_MEMORY_CD4_TCELL_YOUNG_DN	Details ...	191	-0.703839	-2.75222	0	0	0	4077	tags=68%, list=13%, signal=77%
ZHOU_CELL_CYCLE_GENES_IN_IR_RESPONSE_6HR	ZHOU_CELL_CYCLE_GENES_IN_IR_RESPONSE_6HR	Details ...	81	-0.795129	-2.74926	0	0	0	3579	tags=74%, list=11%, signal=83%
KRIGE_RESPONSE_TO_TOSEDOSTAT_6HR_DN	KRIGE_RESPONSE_TO_TOSEDOSTAT_6HR_DN	Details ...	859	-0.632815	-2.74688	0	0	0	4686	tags=61%, list=15%, signal=70%
GSE37532_TREG_VS_TCONV_CD4_TCELL_FROM_LN_UP	GSE37532_TREG_VS_TCONV_CD4_TCELL_FROM_LN_UP	Details ...	187	-0.706442	-2.74631	0	0	0	4041	tags=64%, list=13%, signal=73%
GRAHAM_CML_DIVIDING_VS_NORMAL_QUIESCENT_UP	GRAHAM_CML_DIVIDING_VS_NORMAL_QUIESCENT_UP	Details ...	174	-0.714416	-2.74627	0	0	0	4017	tags=68%, list=13%, signal=77%
GSE33292_WT_VS_TCF1_KO_DN3_THYMOCYTE_DN	GSE33292_WT_VS_TCF1_KO_DN3_THYMOCYTE_DN	Details ...	197	-0.698906	-2.7437	0	0	0	4077	tags=66%, list=13%, signal=75%
KOBAYASHI_EGFR_SIGNALING_24HR_DN	KOBAYASHI_EGFR_SIGNALING_24HR_DN	Details ...	238	-0.68809	-2.73859	0	0	0	4082	tags=72%, list=13%, signal=82%
MORF_PCNA	MORF_PCNA	Details ...	83	-0.78506	-2.73282	0	0	0	4567	tags=73%, list=15%, signal=86%
SHEDDEN_LUNG_CANCER_POOR_SURVIVAL_A6	SHEDDEN_LUNG_CANCER_POOR_SURVIVAL_A6	Details ...	425	-0.652146	-2.72919	0	0	0	4341	tags=58%, list=14%, signal=66%
GSE36476_CTRL_VS_TSST_ACT_72H_MEMORY_CD4_TCELL_YOUNG_DN	GSE36476_CTRL_VS_TSST_ACT_72H_MEMORY_CD4_TCELL_YOUNG_DN	Details ...	191	-0.707339	-2.72898	0	0	0	4058	tags=67%, list=13%, signal=76%
GSE36476_CTRL_VS_TSST_ACT_40H_MEMORY_CD4_TCELL_OLD_DN	GSE36476_CTRL_VS_TSST_ACT_40H_MEMORY_CD4_TCELL_OLD_DN	Details ...	193	-0.703318	-2.72606	0	0	0	4077	tags=66%, list=13%, signal=76%
GSE15750_DAY6_VS_DAY10_TRAF6KO_EFF_CD8_TCELL_UP	GSE15750_DAY6_VS_DAY10_TRAF6KO_EFF_CD8_TCELL_UP	Details ...	188	-0.705165	-2.7254	0	0	0	4339	tags=69%, list=14%, signal=79%
MORF_RAD23A	MORF_RAD23A	Details ...	343	-0.668108	-2.72441	0	0	0	5505	tags=64%, list=18%, signal=76%
GRAHAM_NORMAL_QUIESCENT_VS_NORMAL_DIVIDING_DN	GRAHAM_NORMAL_QUIESCENT_VS_NORMAL_DIVIDING_DN	Details ...	85	-0.770827	-2.72433	0	0	0	3405	tags=73%, list=11%, signal=82%
MORF_FEN1	MORF_FEN1	Details ...	65	-0.813673	-2.70188	0	0	0	4688	tags=85%, list=15%, signal=99%
GNF2_CENPF	GNF2_CENPF	Details ...	61	-0.814479	-2.70149	0	0	0	5500	tags=92%, list=17%, signal=111%
MORF_HAT1	MORF_HAT1	Details ...	174	-0.7045	-2.70093	0	0	0	5534	tags=70%, list=18%, signal=84%
MORF_UNG	MORF_UNG	Details ...	76	-0.795841	-2.69702	0	0	0	4508	tags=80%, list=14%, signal=93%
GSE17974_0H_VS_24H_IN_VITRO_ACT_CD4_TCELL_DN	GSE17974_0H_VS_24H_IN_VITRO_ACT_CD4_TCELL_DN	Details ...	182	-0.704204	-2.69682	0	0	0	4756	tags=66%, list=15%, signal=78%
MORF_FBL	MORF_FBL	Details ...	138	-0.721781	-2.69307	0	0	0	5695	tags=71%, list=18%, signal=86%
MORF_CSNK2B	MORF_CSNK2B	Details ...	286	-0.65948	-2.68763	0	0	0	5592	tags=62%, list=18%, signal=74%
GNF2_CCNB2	GNF2_CCNB2	Details ...	56	-0.817751	-2.68659	0	0	0	5500	tags=95%, list=17%, signal=115%
GNF2_FEN1	GNF2_FEN1	Details ...	56	-0.828731	-2.68639	0	0	0	3389	tags=80%, list=11%, signal=90%
GNF2_CDC2	GNF2_CDC2	Details ...	61	-0.806138	-2.6862	0	0	0	5500	tags=90%, list=17%, signal=109%
GNF2_MCM5	GNF2_MCM5	Details ...	60	-0.811678	-2.67719	0	0	0	4567	tags=78%, list=15%, signal=91%
GSE21546_ELK1_KO_VS_SAP1A_KO_AND_ELK1_KO_DP_THYMOCYTES_DN	GSE21546_ELK1_KO_VS_SAP1A_KO_AND_ELK1_KO_DP_THYMOCYTES_DN	Details ...	181	-0.699115	-2.67357	0	0	0	4609	tags=64%, list=15%, signal=75%
GNF2_MCM4	GNF2_MCM4	Details ...	53	-0.832032	-2.67332	0	0	0	3528	tags=81%, list=11%, signal=91%
ZHANG_TLX_TARGETS_DN	ZHANG_TLX_TARGETS_DN	Details ...	88	-0.764867	-2.66812	0	0	0	4125	tags=70%, list=13%, signal=81%
PUJANA_CHEK2_PCC_NETWORK	PUJANA_CHEK2_PCC_NETWORK	Details ...	754	-0.63049	-2.66661	0	0	0	4567	tags=54%, list=15%, signal=62%
MORF_RAD54L	MORF_RAD54L	Details ...	104	-0.740938	-2.66647	0	0	0	5606	tags=80%, list=18%, signal=97%
GNF2_CCNA2	GNF2_CCNA2	Details ...	67	-0.805323	-2.66554	0	0	0	3528	tags=76%, list=11%, signal=86%
GSE21360_SECONDARY_VS_TERTIARY_MEMORY_CD8_TCELL_UP	GSE21360_SECONDARY_VS_TERTIARY_MEMORY_CD8_TCELL_UP	Details ...	195	-0.68337	-2.66177	0	0	0	4853	tags=65%, list=15%, signal=77%
GNF2_RFC4	GNF2_RFC4	Details ...	59	-0.813891	-2.65857	0	0	0	3389	tags=76%, list=11%, signal=85%
MORF_EI24	MORF_EI24	Details ...	142	-0.709415	-2.65793	0	0	0	5592	tags=68%, list=18%, signal=82%
MORF_AATF	MORF_AATF	Details ...	203	-0.672489	-2.65655	0	0	0	5505	tags=64%, list=18%, signal=77%
SCHLOSSER_MYC_TARGETS_AND_SERUM_RESPONSE_DN	SCHLOSSER_MYC_TARGETS_AND_SERUM_RESPONSE_DN	Details ...	46	-0.84847	-2.6558	0	0	0	2690	tags=80%, list=9%, signal=88%
MUELLER_PLURINET	MUELLER_PLURINET	Details ...	294	-0.655284	-2.64775	0	0	0	4610	tags=59%, list=15%, signal=68%
MORF_GSPT1	MORF_GSPT1	Details ...	49	-0.830018	-2.64576	0	0	0	2810	tags=80%, list=9%, signal=87%
MORF_ESPL1	MORF_ESPL1	Details ...	61	-0.804809	-2.64101	0	0	0	5695	tags=92%, list=18%, signal=112%
GSE36476_CTRL_VS_TSST_ACT_72H_MEMORY_CD4_TCELL_OLD_DN	GSE36476_CTRL_VS_TSST_ACT_72H_MEMORY_CD4_TCELL_OLD_DN	Details ...	194	-0.685851	-2.63887	0	0	0	4077	tags=66%, list=13%, signal=76%
MORF_BUB1	MORF_BUB1	Details ...	52	-0.829227	-2.63485	0	0	0	4017	tags=85%, list=13%, signal=97%
GNF2_CDC20	GNF2_CDC20	Details ...	55	-0.819705	-2.63273	0	0	0	5500	tags=96%, list=17%, signal=117%
MISSIAGLIA_REGULATED_BY_METHYLATION_DN	MISSIAGLIA_REGULATED_BY_METHYLATION_DN	Details ...	115	-0.719684	-2.63072	0	0	0	3579	tags=64%, list=11%, signal=72%
MORF_HDAC2	MORF_HDAC2	Details ...	275	-0.652803	-2.62873	0	0	0	5505	tags=63%, list=18%, signal=76%
GSE24634_TREG_VS_TCONV_POST_DAY3_IL4_CONVERSION_UP	GSE24634_TREG_VS_TCONV_POST_DAY3_IL4_CONVERSION_UP	Details ...	194	-0.678936	-2.62826	0	0	0	4357	tags=70%, list=14%, signal=80%
GSE15930_NAIVE_VS_24H_IN_VITRO_STIM_IL12_CD8_TCELL_DN	GSE15930_NAIVE_VS_24H_IN_VITRO_STIM_IL12_CD8_TCELL_DN	Details ...	193	-0.675396	-2.62814	0	0	0	5228	tags=66%, list=17%, signal=79%
MODULE_158	MODULE_158	Details ...	43	-0.838369	-2.62042	0	0	0	3280	tags=79%, list=10%, signal=88%
GSE24634_TEFF_VS_TCONV_DAY5_IN_CULTURE_UP	GSE24634_TEFF_VS_TCONV_DAY5_IN_CULTURE_UP	Details ...	197	-0.672231	-2.6201	0	0	0	4782	tags=68%, list=15%, signal=80%
MENSSEN_MYC_TARGETS	MENSSEN_MYC_TARGETS	Details ...	51	-0.812424	-2.61822	0	0	0	2594	tags=73%, list=8%, signal=79%
GSE46606_UNSTIM_VS_CD40L_IL2_IL5_DAY3_STIMULATED_BCELL_DN	GSE46606_UNSTIM_VS_CD40L_IL2_IL5_DAY3_STIMULATED_BCELL_DN	Details ...	185	-0.675408	-2.61777	0	0	0	3988	tags=58%, list=13%, signal=66%
BASAKI_YBX1_TARGETS_UP	BASAKI_YBX1_TARGETS_UP	Details ...	263	-0.64263	-2.60981	0	0	0	4747	tags=62%, list=15%, signal=72%
MORF_PPP1CC	MORF_PPP1CC	Details ...	161	-0.692129	-2.60808	0	0	0	4567	tags=63%, list=15%, signal=73%
GSE15930_NAIVE_VS_48H_IN_VITRO_STIM_IFNAB_CD8_TCELL_DN	GSE15930_NAIVE_VS_48H_IN_VITRO_STIM_IFNAB_CD8_TCELL_DN	Details ...	192	-0.673913	-2.60429	0	0	0	4345	tags=59%, list=14%, signal=68%
RPS14_DN.V1_DN	RPS14_DN.V1_DN	Details ...	167	-0.681252	-2.60397	0	0	0	3548	tags=52%, list=11%, signal=58%
WHITEFORD_PEDIATRIC_CANCER_MARKERS	WHITEFORD_PEDIATRIC_CANCER_MARKERS	Details ...	113	-0.725197	-2.60276	0	0	0	4188	tags=74%, list=13%, signal=85%
MYC_UP.V1_UP	MYC_UP.V1_UP	Details ...	156	-0.697039	-2.60174	0	0	0	4685	tags=63%, list=15%, signal=74%
REACTOME_MITOTIC_M_M_G1_PHASES	REACTOME_MITOTIC_M_M_G1_PHASES	Details ...	164	-0.68251	-2.5998	0	0	0	5340	tags=65%, list=17%, signal=78%
GNF2_BUB1B	GNF2_BUB1B	Details ...	49	-0.820788	-2.59065	0	0	0	4017	tags=84%, list=13%, signal=96%
MORF_UBE2N	MORF_UBE2N	Details ...	94	-0.723863	-2.58698	0	0	0	5134	tags=65%, list=16%, signal=77%
GNF2_HMMR	GNF2_HMMR	Details ...	47	-0.818329	-2.58327	0	0	0	5500	tags=96%, list=17%, signal=116%
CROONQUIST_NRAS_SIGNALING_DN	CROONQUIST_NRAS_SIGNALING_DN	Details ...	71	-0.780979	-2.58287	0	0	0	3428	tags=73%, list=11%, signal=82%
GNF2_XRCC5	GNF2_XRCC5	Details ...	74	-0.758218	-2.58231	0	0	0	4982	tags=68%, list=16%, signal=80%
GSE411_100MIN_VS_400MIN_IL6_STIM_MACROPHAGE_DN	GSE411_100MIN_VS_400MIN_IL6_STIM_MACROPHAGE_DN	Details ...	192	-0.661388	-2.58172	0	0	0	4504	tags=61%, list=14%, signal=71%
MORF_MAP2K2	MORF_MAP2K2	Details ...	131	-0.684303	-2.57759	0	0	0	5498	tags=59%, list=17%, signal=71%
MORF_PRKDC	MORF_PRKDC	Details ...	188	-0.668771	-2.57595	0	0	0	5505	tags=70%, list=18%, signal=85%
GSE24634_NAIVE_CD4_TCELL_VS_DAY5_IL4_CONV_TREG_DN	GSE24634_NAIVE_CD4_TCELL_VS_DAY5_IL4_CONV_TREG_DN	Details ...	198	-0.641498	-2.57536	0	0	0	3962	tags=58%, list=13%, signal=65%
MORF_G22P1	MORF_G22P1	Details ...	171	-0.673204	-2.57506	0	0	0	5695	tags=62%, list=18%, signal=75%
REACTOME_DNA_REPLICATION	REACTOME_DNA_REPLICATION	Details ...	184	-0.671167	-2.57493	0	0	0	5340	tags=66%, list=17%, signal=79%
GSE19888_CTRL_VS_A3R_INHIBITOR_TREATED_MAST_CELL_UP	GSE19888_CTRL_VS_A3R_INHIBITOR_TREATED_MAST_CELL_UP	Details ...	184	-0.662596	-2.57488	0	0	0	5120	tags=61%, list=16%, signal=73%
KINSEY_TARGETS_OF_EWSR1_FLII_FUSION_UP	KINSEY_TARGETS_OF_EWSR1_FLII_FUSION_UP	Details ...	1190	-0.59398	-2.57285	0	0	0	5000	tags=53%, list=16%, signal=61%
GSE15930_NAIVE_VS_48H_IN_VITRO_STIM_CD8_TCELL_DN	GSE15930_NAIVE_VS_48H_IN_VITRO_STIM_CD8_TCELL_DN	Details ...	194	-0.669349	-2.57225	0	0	0	5606	tags=69%, list=18%, signal=84%
RHODES_UNDIFFERENTIATED_CANCER	RHODES_UNDIFFERENTIATED_CANCER	Details ...	67	-0.769003	-2.56693	0	0	0	3942	tags=72%, list=13%, signal=82%
GSE15930_NAIVE_VS_24H_IN_VITRO_STIM_CD8_TCELL_DN	GSE15930_NAIVE_VS_24H_IN_VITRO_STIM_CD8_TCELL_DN	Details ...	194	-0.664891	-2.56562	0	0	0	5228	tags=64%, list=17%, signal=77%
NUCLEOLUS	NUCLEOLUS	Details ...	120	-0.705448	-2.56276	0	0	0	3925	tags=58%, list=12%, signal=65%
MORF_BUB1B	MORF_BUB1B	Details ...	65	-0.788557	-2.56138	0	0	0	4017	tags=82%, list=13%, signal=93%
GSE39556_CD8A_DC_VS_NK_CELL_MOUSE_3H_POST_POLYIC_INJ_UP	GSE39556_CD8A_DC_VS_NK_CELL_MOUSE_3H_POST_POLYIC_INJ_UP	Details ...	197	-0.656566	-2.561	0	0	0	4077	tags=63%, list=13%, signal=72%
MORF_MSH2	MORF_MSH2	Details ...	61	-0.764853	-2.55736	0	0	0	4567	tags=72%, list=15%, signal=84%
GSE24574_NAIVE_VS_TCONV_CD4_TCELL_DN	GSE24574_NAIVE_VS_TCONV_CD4_TCELL_DN	Details ...	194	-0.658895	-2.55638	0	0	0	4310	tags=62%, list=14%, signal=71%
GSE15930_NAIVE_VS_24H_IN_VITRO_STIM_INFAB_CD8_TCELL_DN	GSE15930_NAIVE_VS_24H_IN_VITRO_STIM_INFAB_CD8_TCELL_DN	Details ...	194	-0.661036	-2.55492	0	0	0	5228	tags=64%, list=17%, signal=77%
GNF2_CKS2	GNF2_CKS2	Details ...	50	-0.821275	-2.5508	0	0	0	3278	tags=78%, list=10%, signal=87%
GSE30962_PRIMARY_VS_SECONDARY_ACUTE_LCMV_INF_CD8_TCELL_UP	GSE30962_PRIMARY_VS_SECONDARY_ACUTE_LCMV_INF_CD8_TCELL_UP	Details ...	190	-0.66079	-2.54683	0	0	0	5033	tags=62%, list=16%, signal=73%
SONG_TARGETS_OF_IE86_CMV_PROTEIN	SONG_TARGETS_OF_IE86_CMV_PROTEIN	Details ...	60	-0.77464	-2.53944	0	0	0	3428	tags=77%, list=11%, signal=86%
ZHAN_MULTIPLE_MYELOMA_PR_UP	ZHAN_MULTIPLE_MYELOMA_PR_UP	Details ...	41	-0.844169	-2.52955	0	0	0	3396	tags=83%, list=11%, signal=93%
MORF_PTPN11	MORF_PTPN11	Details ...	107	-0.705361	-2.52824	0	0	0	5723	tags=75%, list=18%, signal=91%
GSE22432_MULTIPOTENT_VS_COMMON_DC_PROGENITOR_UNTREATED_UP	GSE22432_MULTIPOTENT_VS_COMMON_DC_PROGENITOR_UNTREATED_UP	Details ...	196	-0.656619	-2.52821	0	0	0	4603	tags=61%, list=15%, signal=71%
GOBERT_OLIGODENDROCYTE_DIFFERENTIATION_UP	GOBERT_OLIGODENDROCYTE_DIFFERENTIATION_UP	Details ...	545	-0.60747	-2.52797	0	0	0	4635	tags=58%, list=15%, signal=67%
GSE24210_CTRL_VS_IL35_TREATED_TCONV_CD4_TCELL_DN	GSE24210_CTRL_VS_IL35_TREATED_TCONV_CD4_TCELL_DN	Details ...	193	-0.645408	-2.52793	0	0	0	5329	tags=61%, list=17%, signal=73%
FOURNIER_ACINAR_DEVELOPMENT_LATE_2	FOURNIER_ACINAR_DEVELOPMENT_LATE_2	Details ...	267	-0.632148	-2.5275	0	0	0	4330	tags=59%, list=14%, signal=68%
MODULE_125	MODULE_125	Details ...	44	-0.821133	-2.52718	0	0	0	3280	tags=77%, list=10%, signal=86%
WELCSH_BRCA1_TARGETS_DN	WELCSH_BRCA1_TARGETS_DN	Details ...	138	-0.677436	-2.52387	0	0	0	3076	tags=51%, list=10%, signal=56%
GSE7764_IL15_TREATED_VS_CTRL_NK_CELL_24H_UP	GSE7764_IL15_TREATED_VS_CTRL_NK_CELL_24H_UP	Details ...	188	-0.644513	-2.51863	0	0	0	4463	tags=59%, list=14%, signal=68%
REACTOME_M_G1_TRANSITION	REACTOME_M_G1_TRANSITION	Details ...	77	-0.739277	-2.51362	0	0	0	5315	tags=70%, list=17%, signal=84%
GNF2_RFC3	GNF2_RFC3	Details ...	40	-0.821176	-2.50971	0	0	0	3389	tags=78%, list=11%, signal=87%
SARRIO_EPITHELIAL_MESENCHYMAL_TRANSITION_UP	SARRIO_EPITHELIAL_MESENCHYMAL_TRANSITION_UP	Details ...	168	-0.650499	-2.50853	0	0	0	4036	tags=58%, list=13%, signal=67%
GNF2_RRM2	GNF2_RRM2	Details ...	40	-0.82827	-2.5085	0	0	0	4610	tags=93%, list=15%, signal=108%
GSE14415_TCONV_VS_FOXP3_KO_INDUCED_TREG_DN	GSE14415_TCONV_VS_FOXP3_KO_INDUCED_TREG_DN	Details ...	179	-0.650684	-2.50684	0	0	0	4828	tags=60%, list=15%, signal=70%
GSE17974_0H_VS_12H_IN_VITRO_ACT_CD4_TCELL_DN	GSE17974_0H_VS_12H_IN_VITRO_ACT_CD4_TCELL_DN	Details ...	188	-0.632374	-2.50603	0	0	0	3393	tags=52%, list=11%, signal=57%
BENPORATH_PROLIFERATION	BENPORATH_PROLIFERATION	Details ...	138	-0.675236	-2.50501	0	0	0	4224	tags=58%, list=13%, signal=67%
GSE21063_WT_VS_NFATC1_KO_8H_ANTI_IGM_STIM_BCELL_UP	GSE21063_WT_VS_NFATC1_KO_8H_ANTI_IGM_STIM_BCELL_UP	Details ...	192	-0.643816	-2.50284	0	0	0	4712	tags=65%, list=15%, signal=76%
DODD_NASOPHARYNGEAL_CARCINOMA_DN	DODD_NASOPHARYNGEAL_CARCINOMA_DN	Details ...	1266	-0.562181	-2.50033	0	0	0	4641	tags=51%, list=15%, signal=57%
GNF2_DEK	GNF2_DEK	Details ...	58	-0.76257	-2.49721	0	0	0	4940	tags=72%, list=16%, signal=86%
GSE41867_DAY6_VS_DAY8_LCMV_ARMSTRONG_EFFECTOR_CD8_TCELL_DN	GSE41867_DAY6_VS_DAY8_LCMV_ARMSTRONG_EFFECTOR_CD8_TCELL_DN	Details ...	190	-0.633708	-2.49625	0	0	0	4870	tags=56%, list=15%, signal=66%
GSE21927_BALBC_VS_C57BL6_MONOCYTE_TUMOR_UP	GSE21927_BALBC_VS_C57BL6_MONOCYTE_TUMOR_UP	Details ...	196	-0.647597	-2.49546	0	0	0	4982	tags=62%, list=16%, signal=74%
TIEN_INTESTINE_PROBIOTICS_24HR_UP	TIEN_INTESTINE_PROBIOTICS_24HR_UP	Details ...	542	-0.5894	-2.49456	0	0	0	5874	tags=59%, list=19%, signal=72%
MORF_GMPS	MORF_GMPS	Details ...	52	-0.775898	-2.49198	0	0	0	5695	tags=83%, list=18%, signal=101%
GNF2_NPM1	GNF2_NPM1	Details ...	72	-0.72401	-2.49134	0	0	0	4294	tags=57%, list=14%, signal=66%
PUJANA_XPRSS_INT_NETWORK	PUJANA_XPRSS_INT_NETWORK	Details ...	167	-0.649206	-2.49045	0	0	0	5091	tags=64%, list=16%, signal=76%
PUJANA_BRCA_CENTERED_NETWORK	PUJANA_BRCA_CENTERED_NETWORK	Details ...	117	-0.687165	-2.48769	0	0	0	5340	tags=70%, list=17%, signal=84%
ODONNELL_TARGETS_OF_MYC_AND_TFRC_DN	ODONNELL_TARGETS_OF_MYC_AND_TFRC_DN	Details ...	44	-0.823407	-2.48677	0	0	0	4610	tags=89%, list=15%, signal=104%
GNF2_APEX1	GNF2_APEX1	Details ...	92	-0.709359	-2.48637	0	0	0	4745	tags=64%, list=15%, signal=75%
GNF2_MLH1	GNF2_MLH1	Details ...	42	-0.807942	-2.4856	0	0	0	3056	tags=69%, list=10%, signal=76%
GSE24634_TEFF_VS_TCONV_DAY3_IN_CULTURE_UP	GSE24634_TEFF_VS_TCONV_DAY3_IN_CULTURE_UP	Details ...	194	-0.635634	-2.48292	0	0	0	4779	tags=62%, list=15%, signal=73%
REACTOME_S_PHASE	REACTOME_S_PHASE	Details ...	105	-0.689545	-2.48262	0	0	0	4838	tags=66%, list=15%, signal=77%
GNF2_ESPL1	GNF2_ESPL1	Details ...	35	-0.842723	-2.48063	0	0	0	4017	tags=91%, list=13%, signal=105%
MARKEY_RB1_ACUTE_LOF_DN	MARKEY_RB1_ACUTE_LOF_DN	Details ...	220	-0.619235	-2.47661	0	0	0	4127	tags=56%, list=13%, signal=64%
KAUFFMANN_MELANOMA_RELAPSE_UP	KAUFFMANN_MELANOMA_RELAPSE_UP	Details ...	60	-0.743946	-2.47593	0	0	0	4536	tags=72%, list=14%, signal=84%
GNF2_TTK	GNF2_TTK	Details ...	39	-0.827172	-2.47489	0	0	0	3389	tags=82%, list=11%, signal=92%
OXFORD_RALA_OR_RALB_TARGETS_UP	OXFORD_RALA_OR_RALB_TARGETS_UP	Details ...	47	-0.778101	-2.46999	0	0	0	4610	tags=79%, list=15%, signal=92%
KONG_E2F3_TARGETS	KONG_E2F3_TARGETS	Details ...	92	-0.701964	-2.46758	0	0	0	4113	tags=66%, list=13%, signal=76%
GSE369_SOCS3_KO_VS_WT_LIVER_UP	GSE369_SOCS3_KO_VS_WT_LIVER_UP	Details ...	186	-0.641844	-2.46727	0	0	0	4948	tags=62%, list=16%, signal=74%
GRADE_COLON_AND_RECTAL_CANCER_UP	GRADE_COLON_AND_RECTAL_CANCER_UP	Details ...	274	-0.612614	-2.46508	0	0	0	4345	tags=56%, list=14%, signal=65%
GNF2_CENPE	GNF2_CENPE	Details ...	40	-0.812523	-2.46494	0	0	0	5500	tags=95%, list=17%, signal=115%
GNF2_CKS1B	GNF2_CKS1B	Details ...	37	-0.831692	-2.4639	0	0	0	3528	tags=84%, list=11%, signal=94%
MORF_SMC1L1	MORF_SMC1L1	Details ...	62	-0.751214	-2.45949	0	0	0	5723	tags=74%, list=18%, signal=91%
GSE17974_CTRL_VS_ACT_IL4_AND_ANTI_IL12_12H_CD4_TCELL_DN	GSE17974_CTRL_VS_ACT_IL4_AND_ANTI_IL12_12H_CD4_TCELL_DN	Details ...	187	-0.628482	-2.45787	0	0	0	4218	tags=56%, list=13%, signal=64%
REACTOME_SYNTHESIS_OF_DNA	REACTOME_SYNTHESIS_OF_DNA	Details ...	89	-0.695219	-2.45753	0	0	0	5315	tags=71%, list=17%, signal=85%
GSE19888_ADENOSINE_A3R_ACT_VS_A3R_ACT_WITH_A3R_INH_PRETREATMENT_IN_MAST_CELL_UP	GSE19888_ADENOSINE_A3R_ACT_VS_A3R_ACT_WITH_A3R_INH_PRETREATMENT_IN_MAST_CELL_UP	Details ...	175	-0.636685	-2.45746	0	0	0	5558	tags=61%, list=18%, signal=74%
ZHANG_TLX_TARGETS_36HR_DN	ZHANG_TLX_TARGETS_36HR_DN	Details ...	184	-0.630387	-2.45654	0	0	0	5299	tags=59%, list=17%, signal=71%
GSE22886_UNSTIM_VS_STIM_MEMORY_TCELL_DN	GSE22886_UNSTIM_VS_STIM_MEMORY_TCELL_DN	Details ...	193	-0.623322	-2.45616	0	0	0	5183	tags=62%, list=16%, signal=74%
GNF2_KPNB1	GNF2_KPNB1	Details ...	72	-0.73369	-2.45589	0	0	0	4982	tags=67%, list=16%, signal=79%
KANG_DOXORUBICIN_RESISTANCE_UP	KANG_DOXORUBICIN_RESISTANCE_UP	Details ...	53	-0.771348	-2.45541	0	0	0	3280	tags=68%, list=10%, signal=76%
GSE3982_BASOPHIL_VS_TH1_DN	GSE3982_BASOPHIL_VS_TH1_DN	Details ...	193	-0.633777	-2.4514	0	0	0	4019	tags=52%, list=13%, signal=59%
REACTOME_METABOLISM_OF_NON_CODING_RNA	REACTOME_METABOLISM_OF_NON_CODING_RNA	Details ...	49	-0.768436	-2.44951	0	0	0	5562	tags=78%, list=18%, signal=94%
YAO_TEMPORAL_RESPONSE_TO_PROGESTERONE_CLUSTER_14	YAO_TEMPORAL_RESPONSE_TO_PROGESTERONE_CLUSTER_14	Details ...	140	-0.643465	-2.44761	0	0	0	4506	tags=56%, list=14%, signal=66%
GSE7568_IL4_TGFB_DEXAMETHASONE_VS_IL4_TGFB_TREATED_MACROPHAGE_UP	GSE7568_IL4_TGFB_DEXAMETHASONE_VS_IL4_TGFB_TREATED_MACROPHAGE_UP	Details ...	168	-0.648462	-2.44667	0	0	0	4028	tags=60%, list=13%, signal=68%
BERENJENO_TRANSFORMED_BY_RHOA_UP	BERENJENO_TRANSFORMED_BY_RHOA_UP	Details ...	509	-0.584372	-2.44228	0	0	0	4136	tags=56%, list=13%, signal=64%
GNF2_HAT1	GNF2_HAT1	Details ...	50	-0.772427	-2.43927	0	0	0	4567	tags=72%, list=15%, signal=84%
GSE16451_CTRL_VS_WEST_EQUINE_ENC_VIRUS_IMMATURE_NEURON_CELL_LINE_DN	GSE16451_CTRL_VS_WEST_EQUINE_ENC_VIRUS_IMMATURE_NEURON_CELL_LINE_DN	Details ...	190	-0.624945	-2.43661	0	0	0	3087	tags=46%, list=10%, signal=50%
LI_WILMS_TUMOR_VS_FETAL_KIDNEY_1_DN	LI_WILMS_TUMOR_VS_FETAL_KIDNEY_1_DN	Details ...	161	-0.634083	-2.43658	0	0	0	4141	tags=55%, list=13%, signal=63%
WANG_RESPONSE_TO_GSK3_INHIBITOR_SB216763_DN	WANG_RESPONSE_TO_GSK3_INHIBITOR_SB216763_DN	Details ...	348	-0.597523	-2.43644	0	0	0	3194	tags=55%, list=10%, signal=61%
GNF2_MSH2	GNF2_MSH2	Details ...	28	-0.845253	-2.43224	0	0	0	3040	tags=79%, list=10%, signal=87%
GSE35543_IN_VITRO_ITREG_VS_CONVERTED_EX_ITREG_UP	GSE35543_IN_VITRO_ITREG_VS_CONVERTED_EX_ITREG_UP	Details ...	182	-0.631899	-2.42953	0	0	0	3795	tags=52%, list=12%, signal=58%
GSE6674_ANTI_IGM_VS_ANTI_IGM_AND_CPG_STIM_BCELL_DN	GSE6674_ANTI_IGM_VS_ANTI_IGM_AND_CPG_STIM_BCELL_DN	Details ...	190	-0.62708	-2.427	0	0	0	3589	tags=56%, list=11%, signal=63%
GSE24210_RESTING_TREG_VS_TCONV_DN	GSE24210_RESTING_TREG_VS_TCONV_DN	Details ...	191	-0.622848	-2.42669	0	0	0	4762	tags=57%, list=15%, signal=67%
MORF_ERH	MORF_ERH	Details ...	114	-0.677152	-2.42577	0	0	0	5271	tags=62%, list=17%, signal=75%
MORF_EIF4E	MORF_EIF4E	Details ...	82	-0.697221	-2.41859	0	0	0	3677	tags=62%, list=12%, signal=70%
REACTOME_TRNA_AMINOACYLATION	REACTOME_TRNA_AMINOACYLATION	Details ...	42	-0.780563	-2.41698	0	0	0	4136	tags=76%, list=13%, signal=88%
GNF2_SMC2L1	GNF2_SMC2L1	Details ...	32	-0.813699	-2.41484	0	0	0	4017	tags=81%, list=13%, signal=93%
REACTOME_ASSEMBLY_OF_THE_PRE_REPLICATIVE_COMPLEX	REACTOME_ASSEMBLY_OF_THE_PRE_REPLICATIVE_COMPLEX	Details ...	62	-0.728028	-2.41341	0	0	0	4838	tags=65%, list=15%, signal=76%
MORF_PRDX3	MORF_PRDX3	Details ...	84	-0.692895	-2.41127	0	0	0	5695	tags=62%, list=18%, signal=75%
PUJANA_BRCA2_PCC_NETWORK	PUJANA_BRCA2_PCC_NETWORK	Details ...	408	-0.579146	-2.40869	0	0	0	4567	tags=52%, list=15%, signal=60%
GSE17974_0H_VS_4H_IN_VITRO_ACT_CD4_TCELL_DN	GSE17974_0H_VS_4H_IN_VITRO_ACT_CD4_TCELL_DN	Details ...	177	-0.624976	-2.40854	0	0	0	3850	tags=50%, list=12%, signal=56%
GSE40274_CTRL_VS_XBP1_TRANSDUCED_ACTIVATED_CD4_TCELL_DN	GSE40274_CTRL_VS_XBP1_TRANSDUCED_ACTIVATED_CD4_TCELL_DN	Details ...	155	-0.629434	-2.4075	0	0	0	4678	tags=53%, list=15%, signal=62%
BENPORATH_ES_1	BENPORATH_ES_1	Details ...	344	-0.584229	-2.40666	0	0	0	4610	tags=49%, list=15%, signal=57%
CHANG_CORE_SERUM_RESPONSE_UP	CHANG_CORE_SERUM_RESPONSE_UP	Details ...	204	-0.621695	-2.40629	0	0	0	4747	tags=63%, list=15%, signal=73%
BURTON_ADIPOGENESIS_3	BURTON_ADIPOGENESIS_3	Details ...	100	-0.672147	-2.40296	0	0	0	3463	tags=64%, list=11%, signal=72%
GSE17974_CTRL_VS_ACT_IL4_AND_ANTI_IL12_24H_CD4_TCELL_DN	GSE17974_CTRL_VS_ACT_IL4_AND_ANTI_IL12_24H_CD4_TCELL_DN	Details ...	188	-0.62632	-2.40289	0	0	0	4683	tags=59%, list=15%, signal=68%
WU_APOPTOSIS_BY_CDKN1A_VIA_TP53	WU_APOPTOSIS_BY_CDKN1A_VIA_TP53		53	-0.743293	-2.40174	0	0	0	4741	tags=68%, list=15%, signal=80%
GSE14415_INDUCED_TREG_VS_FAILED_INDUCED_TREG_UP	GSE14415_INDUCED_TREG_VS_FAILED_INDUCED_TREG_UP		183	-0.622911	-2.4005	0	0	0	5562	tags=67%, list=18%, signal=81%
REACTOME_G1_S_TRANSITION	REACTOME_G1_S_TRANSITION		106	-0.665939	-2.39844	0	0	0	4838	tags=62%, list=15%, signal=73%
FUJII_YBX1_TARGETS_DN	FUJII_YBX1_TARGETS_DN		193	-0.621368	-2.3958	0	0	0	4361	tags=58%, list=14%, signal=66%
REACTOME_CELL_CYCLE_CHECKPOINTS	REACTOME_CELL_CYCLE_CHECKPOINTS		110	-0.66695	-2.3936	0	0	0	5315	tags=63%, list=17%, signal=75%
GSE21546_UNSTIM_VS_ANTI_CD3_STIM_DP_THYMOCYTES_DN	GSE21546_UNSTIM_VS_ANTI_CD3_STIM_DP_THYMOCYTES_DN		179	-0.628086	-2.39192	0	0	0	4934	tags=62%, list=16%, signal=73%
GSE13547_2H_VS_12_H_ANTI_IGM_STIM_BCELL_DN	GSE13547_2H_VS_12_H_ANTI_IGM_STIM_BCELL_DN		176	-0.621369	-2.38991	0	0	0	4977	tags=57%, list=16%, signal=68%
FARMER_BREAST_CANCER_CLUSTER_2	FARMER_BREAST_CANCER_CLUSTER_2		33	-0.812904	-2.388	0	0	0	4290	tags=85%, list=14%, signal=98%
GSE3982_NKCELL_VS_TH2_DN	GSE3982_NKCELL_VS_TH2_DN		195	-0.62034	-2.3879	0	0	0	4745	tags=59%, list=15%, signal=69%
CHANG_CYCLING_GENES	CHANG_CYCLING_GENES		144	-0.630246	-2.38471	0	0	0	4113	tags=64%, list=13%, signal=73%
BURTON_ADIPOGENESIS_PEAK_AT_24HR	BURTON_ADIPOGENESIS_PEAK_AT_24HR		41	-0.791631	-2.38421	0	0	0	4017	tags=73%, list=13%, signal=84%
GSE22611_NOD2_TRANSDUCED_VS_CTRL_HEK293T_STIMULATED_WITH_MDP_2H_DN	GSE22611_NOD2_TRANSDUCED_VS_CTRL_HEK293T_STIMULATED_WITH_MDP_2H_DN		171	-0.618424	-2.38374	0	0	0	4090	tags=50%, list=13%, signal=57%
ISHIDA_E2F_TARGETS	ISHIDA_E2F_TARGETS		51	-0.752882	-2.38336	0	0	0	3280	tags=71%, list=10%, signal=79%
HOFFMANN_LARGE_TO_SMALL_PRE_BII_LYMPHOCYTE_UP	HOFFMANN_LARGE_TO_SMALL_PRE_BII_LYMPHOCYTE_UP		156	-0.623533	-2.38204	0	0	0	4086	tags=61%, list=13%, signal=70%
CSR_LATE_UP.V1_UP	CSR_LATE_UP.V1_UP		152	-0.63745	-2.38113	0	0	0	4741	tags=65%, list=15%, signal=76%
REACTOME_CELL_CYCLE_MITOTIC	REACTOME_CELL_CYCLE_MITOTIC		304	-0.593622	-2.37946	0	0	0	5072	tags=58%, list=16%, signal=68%
MORF_RAN	MORF_RAN		265	-0.59608	-2.37602	0	0	0	5695	tags=53%, list=18%, signal=64%
GSE14415_INDUCED_VS_NATURAL_TREG_DN	GSE14415_INDUCED_VS_NATURAL_TREG_DN		174	-0.621518	-2.37594	0	0	0	4753	tags=59%, list=15%, signal=69%
GSE28726_NAIVE_CD4_TCELL_VS_NAIVE_VA24NEG_NKTCELL_UP	GSE28726_NAIVE_CD4_TCELL_VS_NAIVE_VA24NEG_NKTCELL_UP		193	-0.613705	-2.3726	0	0	0	4047	tags=59%, list=13%, signal=67%
RODRIGUES_THYROID_CARCINOMA_POORLY_DIFFERENTIATED_UP	RODRIGUES_THYROID_CARCINOMA_POORLY_DIFFERENTIATED_UP		606	-0.559848	-2.37203	0	0	0	4762	tags=52%, list=15%, signal=60%
GSE7568_IL4_VS_IL4_AND_TGFB_TREATED_MACROPHAGE_24H_DN	GSE7568_IL4_VS_IL4_AND_TGFB_TREATED_MACROPHAGE_24H_DN		183	-0.609984	-2.37096	0	0	0	4435	tags=55%, list=14%, signal=63%
MODULE_403	MODULE_403		45	-0.762396	-2.36898	0	0	0	4390	tags=80%, list=14%, signal=93%
GNF2_H2AFX	GNF2_H2AFX		31	-0.820901	-2.36858	0	0	0	5472	tags=94%, list=17%, signal=113%
GSE3982_NKCELL_VS_TH1_DN	GSE3982_NKCELL_VS_TH1_DN		191	-0.611185	-2.3676	0	0	0	3959	tags=53%, list=13%, signal=61%
MORI_IMMATURE_B_LYMPHOCYTE_DN	MORI_IMMATURE_B_LYMPHOCYTE_DN		89	-0.672382	-2.36638	0	0	0	3428	tags=67%, list=11%, signal=75%
GSE31082_DN_VS_DP_THYMOCYTE_UP	GSE31082_DN_VS_DP_THYMOCYTE_UP		189	-0.609935	-2.36274	0	0	0	4982	tags=59%, list=16%, signal=70%
REACTOME_DNA_STRAND_ELONGATION	REACTOME_DNA_STRAND_ELONGATION		30	-0.8002	-2.36012	0	0	0	2927	tags=77%, list=9%, signal=84%
GNF2_BUB1	GNF2_BUB1		26	-0.851917	-2.35929	0	0	0	4017	tags=92%, list=13%, signal=106%
GNF2_MSH6	GNF2_MSH6		31	-0.825789	-2.35901	0	0	0	5505	tags=100%, list=18%, signal=121%
GSE15930_NAIVE_VS_48H_IN_VITRO_STIM_IL12_CD8_TCELL_DN	GSE15930_NAIVE_VS_48H_IN_VITRO_STIM_IL12_CD8_TCELL_DN		191	-0.602002	-2.35705	0	0	0	5324	tags=63%, list=17%, signal=75%
GSE20715_0H_VS_48H_OZONE_TLR4_KO_LUNG_DN	GSE20715_0H_VS_48H_OZONE_TLR4_KO_LUNG_DN		189	-0.601973	-2.35526	0	0	0	4881	tags=52%, list=16%, signal=61%
KIM_MYC_AMPLIFICATION_TARGETS_UP	KIM_MYC_AMPLIFICATION_TARGETS_UP		187	-0.608498	-2.35207	0	0	0	3279	tags=43%, list=10%, signal=48%
GSE16451_IMMATURE_VS_MATURE_NEURON_CELL_LINE_WEST_EQUINE_ENC_VIRUS_DN	GSE16451_IMMATURE_VS_MATURE_NEURON_CELL_LINE_WEST_EQUINE_ENC_VIRUS_DN		188	-0.612421	-2.35102	0	0	0	4102	tags=62%, list=13%, signal=71%
PUJANA_BREAST_CANCER_WITH_BRCA1_MUTATED_UP	PUJANA_BREAST_CANCER_WITH_BRCA1_MUTATED_UP		56	-0.726839	-2.34806	0	0	0	4680	tags=70%, list=15%, signal=82%
GSE28726_NAIVE_VS_ACTIVATED_CD4_TCELL_DN	GSE28726_NAIVE_VS_ACTIVATED_CD4_TCELL_DN		190	-0.598279	-2.34785	0	0	0	4073	tags=57%, list=13%, signal=65%
REACTOME_PROCESSING_OF_CAPPED_INTRON_CONTAINING_PRE_MRNA	REACTOME_PROCESSING_OF_CAPPED_INTRON_CONTAINING_PRE_MRNA		136	-0.63586	-2.34783	0	0	0	5605	tags=60%, list=18%, signal=72%
MORI_LARGE_PRE_BII_LYMPHOCYTE_UP	MORI_LARGE_PRE_BII_LYMPHOCYTE_UP		83	-0.674422	-2.3475	0	0	0	4678	tags=73%, list=15%, signal=86%
CHEMNITZ_RESPONSE_TO_PROSTAGLANDIN_E2_UP	CHEMNITZ_RESPONSE_TO_PROSTAGLANDIN_E2_UP		137	-0.633736	-2.34696	0	0	0	4266	tags=57%, list=14%, signal=66%
GNF2_ANP32B	GNF2_ANP32B		37	-0.763539	-2.34591	0	0	0	4552	tags=70%, list=14%, signal=82%
REACTOME_TRANSPORT_OF_MATURE_TRANSCRIPT_TO_CYTOPLASM	REACTOME_TRANSPORT_OF_MATURE_TRANSCRIPT_TO_CYTOPLASM		52	-0.734483	-2.34275	0	0	0	5570	tags=71%, list=18%, signal=86%
BHATTACHARYA_EMBRYONIC_STEM_CELL	BHATTACHARYA_EMBRYONIC_STEM_CELL		81	-0.664286	-2.34177	0	0	0	4470	tags=56%, list=14%, signal=65%
MORF_DEK	MORF_DEK		260	-0.581506	-2.34124	0	0	0	5505	tags=55%, list=18%, signal=67%
GARY_CD5_TARGETS_DN	GARY_CD5_TARGETS_DN		420	-0.564799	-2.33951	0	0	0	4843	tags=55%, list=15%, signal=65%
FRASOR_RESPONSE_TO_SERM_OR_FULVESTRANT_DN	FRASOR_RESPONSE_TO_SERM_OR_FULVESTRANT_DN		49	-0.737821	-2.33899	0	0	0	3880	tags=78%, list=12%, signal=88%
GSE17974_CTRL_VS_ACT_IL4_AND_ANTI_IL12_4H_CD4_TCELL_DN	GSE17974_CTRL_VS_ACT_IL4_AND_ANTI_IL12_4H_CD4_TCELL_DN		183	-0.603498	-2.33615	0	0	0	4290	tags=55%, list=14%, signal=63%
MODULE_57	MODULE_57		56	-0.72348	-2.33591	0	0	0	3528	tags=68%, list=11%, signal=76%
GSE22886_NAIVE_CD4_TCELL_VS_48H_ACT_TH1_DN	GSE22886_NAIVE_CD4_TCELL_VS_48H_ACT_TH1_DN		195	-0.602637	-2.33552	0	0	0	5534	tags=67%, list=18%, signal=81%
BURTON_ADIPOGENESIS_PEAK_AT_16HR	BURTON_ADIPOGENESIS_PEAK_AT_16HR		40	-0.763268	-2.33433	0	0	0	1948	tags=63%, list=6%, signal=67%
GARCIA_TARGETS_OF_FLI1_AND_DAX1_DN	GARCIA_TARGETS_OF_FLI1_AND_DAX1_DN		160	-0.615022	-2.33247	0	0	0	3866	tags=50%, list=12%, signal=57%
GSE15271_CXCR4_POS_VS_NEG_GC_BCELL_UP	GSE15271_CXCR4_POS_VS_NEG_GC_BCELL_UP		169	-0.612765	-2.32985	0	0	0	4666	tags=52%, list=15%, signal=61%
FEVR_CTNNB1_TARGETS_DN	FEVR_CTNNB1_TARGETS_DN		523	-0.541968	-2.32844	0	0	0	4843	tags=53%, list=15%, signal=62%
KEGG_DNA_REPLICATION	KEGG_DNA_REPLICATION		36	-0.785088	-2.32801	0	0	0	4567	tags=81%, list=15%, signal=94%
MORF_XRCC5	MORF_XRCC5		232	-0.587455	-2.32597	0	0	0	5505	tags=57%, list=18%, signal=69%
GNF2_ELAC2	GNF2_ELAC2		46	-0.746421	-2.32489	0	0	0	4838	tags=65%, list=15%, signal=77%
GSE22432_MULTIPOTENT_VS_COMMON_DC_PROGENITOR_UNTREATED_DN	GSE22432_MULTIPOTENT_VS_COMMON_DC_PROGENITOR_UNTREATED_DN		188	-0.599163	-2.32224	0	0	0	4385	tags=52%, list=14%, signal=60%
TANG_SENESCENCE_TP53_TARGETS_DN	TANG_SENESCENCE_TP53_TARGETS_DN		56	-0.715974	-2.3213	0	0	0	5299	tags=70%, list=17%, signal=84%
GNF2_SMC1L1	GNF2_SMC1L1		27	-0.844684	-2.32066	0	0	0	3280	tags=70%, list=10%, signal=78%
HALLMARK_G2M_CHECKPOINT	HALLMARK_G2M_CHECKPOINT		199	-0.602362	-2.32019	0	0	0	5072	tags=64%, list=16%, signal=76%
GSE22919_RESTING_VS_IL2_IL12_IL15_STIM_NK_CELL_UP	GSE22919_RESTING_VS_IL2_IL12_IL15_STIM_NK_CELL_UP		185	-0.600943	-2.31851	0	0	0	4779	tags=58%, list=15%, signal=68%
GSE26156_DOUBLE_POSITIVE_VS_CD4_SINGLE_POSITIVE_THYMOCYTE_DN	GSE26156_DOUBLE_POSITIVE_VS_CD4_SINGLE_POSITIVE_THYMOCYTE_DN		192	-0.601378	-2.31775	0	0	0	4058	tags=58%, list=13%, signal=67%
MODULE_126	MODULE_126		174	-0.602464	-2.3174	0	0	0	3743	tags=52%, list=12%, signal=59%
GSE4142_NAIVE_VS_GC_BCELL_DN	GSE4142_NAIVE_VS_GC_BCELL_DN		178	-0.59826	-2.31469	0	0	0	4836	tags=58%, list=15%, signal=68%
AFFAR_YY1_TARGETS_DN	AFFAR_YY1_TARGETS_DN		202	-0.589732	-2.31008	0	0	0	4017	tags=49%, list=13%, signal=56%
REACTOME_G2_M_CHECKPOINTS	REACTOME_G2_M_CHECKPOINTS		41	-0.756657	-2.30978	0	0	0	3017	tags=63%, list=10%, signal=70%
MARSON_BOUND_BY_E2F4_UNSTIMULATED	MARSON_BOUND_BY_E2F4_UNSTIMULATED		692	-0.540782	-2.30535	0	0	0	4995	tags=52%, list=16%, signal=61%
IRITANI_MAD1_TARGETS_DN	IRITANI_MAD1_TARGETS_DN		46	-0.738904	-2.30493	0	0	0	4357	tags=65%, list=14%, signal=76%
GSE25088_WT_VS_STAT6_KO_MACROPHAGE_IL4_STIM_DN	GSE25088_WT_VS_STAT6_KO_MACROPHAGE_IL4_STIM_DN		183	-0.592686	-2.30443	0	0	0	3852	tags=49%, list=12%, signal=56%
GSE22601_DOUBLE_POSITIVE_VS_CD4_SINGLE_POSITIVE_THYMOCYTE_DN	GSE22601_DOUBLE_POSITIVE_VS_CD4_SINGLE_POSITIVE_THYMOCYTE_DN		190	-0.601005	-2.29855	0	0	0	4079	tags=55%, list=13%, signal=63%
SCHLOSSER_MYC_AND_SERUM_RESPONSE_SYNERGY	SCHLOSSER_MYC_AND_SERUM_RESPONSE_SYNERGY		32	-0.790298	-2.29661	0	0	0	4041	tags=72%, list=13%, signal=82%
MORF_DAP3	MORF_DAP3		192	-0.591828	-2.29408	0	0	0	5667	tags=54%, list=18%, signal=66%
GSE13547_CTRL_VS_ANTI_IGM_STIM_BCELL_12H_UP	GSE13547_CTRL_VS_ANTI_IGM_STIM_BCELL_12H_UP		178	-0.590797	-2.29219	0	0	0	4113	tags=57%, list=13%, signal=66%
VECCHI_GASTRIC_CANCER_EARLY_UP	VECCHI_GASTRIC_CANCER_EARLY_UP		392	-0.556204	-2.29059	0	0	0	4452	tags=52%, list=14%, signal=60%
KEGG_PROTEASOME	KEGG_PROTEASOME		44	-0.740808	-2.2901	0	0	0	4838	tags=66%, list=15%, signal=78%
GSE3982_EOSINOPHIL_VS_TH1_DN	GSE3982_EOSINOPHIL_VS_TH1_DN		194	-0.587909	-2.28829	0	0	0	4951	tags=55%, list=16%, signal=64%
GSE17974_0H_VS_6H_IN_VITRO_ACT_CD4_TCELL_DN	GSE17974_0H_VS_6H_IN_VITRO_ACT_CD4_TCELL_DN		189	-0.59387	-2.287	0	0	0	3959	tags=55%, list=13%, signal=63%
RUIZ_TNC_TARGETS_DN	RUIZ_TNC_TARGETS_DN		133	-0.625282	-2.28627	0	0	0	3428	tags=56%, list=11%, signal=62%
GSE369_IFNG_KO_VS_WT_LIVER_DN	GSE369_IFNG_KO_VS_WT_LIVER_DN		187	-0.584084	-2.28451	0	0	0	4558	tags=55%, list=14%, signal=63%
MORF_RPA1	MORF_RPA1		61	-0.69308	-2.28437	0	0	0	4508	tags=59%, list=14%, signal=69%
MITSIADES_RESPONSE_TO_APLIDIN_DN	MITSIADES_RESPONSE_TO_APLIDIN_DN		243	-0.583766	-2.2839	0	0	0	4610	tags=58%, list=15%, signal=67%
SCHLOSSER_MYC_TARGETS_AND_SERUM_RESPONSE_UP	SCHLOSSER_MYC_TARGETS_AND_SERUM_RESPONSE_UP		46	-0.737412	-2.28101	0	0	0	4795	tags=78%, list=15%, signal=92%
GSE15750_DAY6_VS_DAY10_EFF_CD8_TCELL_UP	GSE15750_DAY6_VS_DAY10_EFF_CD8_TCELL_UP		193	-0.590699	-2.28029	0	0	0	4741	tags=64%, list=15%, signal=75%
GSE24634_NAIVE_CD4_TCELL_VS_DAY3_IL4_CONV_TREG_DN	GSE24634_NAIVE_CD4_TCELL_VS_DAY3_IL4_CONV_TREG_DN		192	-0.594268	-2.27872	0	0	0	4756	tags=60%, list=15%, signal=70%
REACTOME_MITOCHONDRIAL_PROTEIN_IMPORT	REACTOME_MITOCHONDRIAL_PROTEIN_IMPORT		49	-0.712812	-2.27842	0	0	0	5503	tags=73%, list=17%, signal=89%
REACTOME_MRNA_PROCESSING	REACTOME_MRNA_PROCESSING		156	-0.61364	-2.27664	0	0	0	6175	tags=60%, list=20%, signal=74%
ACOSTA_PROLIFERATION_INDEPENDENT_MYC_TARGETS_UP	ACOSTA_PROLIFERATION_INDEPENDENT_MYC_TARGETS_UP		77	-0.655708	-2.27589	0	0	0	2986	tags=48%, list=9%, signal=53%
KAMMINGA_EZH2_TARGETS	KAMMINGA_EZH2_TARGETS		40	-0.762704	-2.27543	0	0	0	3785	tags=73%, list=12%, signal=82%
TARTE_PLASMA_CELL_VS_PLASMABLAST_DN	TARTE_PLASMA_CELL_VS_PLASMABLAST_DN		304	-0.566308	-2.2747	0	0	0	4218	tags=56%, list=13%, signal=64%
DANG_REGULATED_BY_MYC_UP	DANG_REGULATED_BY_MYC_UP		68	-0.660122	-2.27311	0	0	0	4041	tags=60%, list=13%, signal=69%
RNA_PROCESSING	RNA_PROCESSING		170	-0.599581	-2.27309	0	0	0	5830	tags=55%, list=19%, signal=68%
GSE22432_CONVENTIONAL_CDC_VS_PLASMACYTOID_PDC_UP	GSE22432_CONVENTIONAL_CDC_VS_PLASMACYTOID_PDC_UP		183	-0.594218	-2.27251	0	0	0	4154	tags=52%, list=13%, signal=59%
CASORELLI_ACUTE_PROMYELOCYTIC_LEUKEMIA_DN	CASORELLI_ACUTE_PROMYELOCYTIC_LEUKEMIA_DN		637	-0.527938	-2.27078	0	0	0	4567	tags=50%, list=15%, signal=58%
RIBONUCLEOPROTEIN_COMPLEX	RIBONUCLEOPROTEIN_COMPLEX		141	-0.614749	-2.27069	0	0	0	5605	tags=57%, list=18%, signal=70%
WONG_MITOCHONDRIA_GENE_MODULE	WONG_MITOCHONDRIA_GENE_MODULE		211	-0.578317	-2.26947	0	0	0	4479	tags=51%, list=14%, signal=59%
GSE3982_EFF_MEMORY_CD4_TCELL_VS_TH2_DN	GSE3982_EFF_MEMORY_CD4_TCELL_VS_TH2_DN		190	-0.577606	-2.26858	0	0	0	4566	tags=49%, list=15%, signal=57%
GNF2_MKI67	GNF2_MKI67		27	-0.825748	-2.26817	0	0	0	3942	tags=89%, list=13%, signal=102%
ODONNELL_TFRC_TARGETS_DN	ODONNELL_TFRC_TARGETS_DN		123	-0.625248	-2.26431	0	0	0	4070	tags=58%, list=13%, signal=66%
BOYAULT_LIVER_CANCER_SUBCLASS_G3_UP	BOYAULT_LIVER_CANCER_SUBCLASS_G3_UP		182	-0.58737	-2.26323	0	0	0	4402	tags=54%, list=14%, signal=62%
MORF_PHB	MORF_PHB		121	-0.614721	-2.26243	0	0	0	4855	tags=55%, list=15%, signal=65%
GSE14415_INDUCED_TREG_VS_TCONV_UP	GSE14415_INDUCED_TREG_VS_TCONV_UP		170	-0.585172	-2.26128	0	0	0	5804	tags=62%, list=18%, signal=75%
REACTOME_ACTIVATION_OF_THE_PRE_REPLICATIVE_COMPLEX	REACTOME_ACTIVATION_OF_THE_PRE_REPLICATIVE_COMPLEX		30	-0.77593	-2.26028	0	0	0	5274	tags=80%, list=17%, signal=96%
GSE22432_PDC_VS_TGFB1_TREATEDCOMMON_DC_PROGENITOR_UP	GSE22432_PDC_VS_TGFB1_TREATEDCOMMON_DC_PROGENITOR_UP		190	-0.577254	-2.25906	0	0	0	5627	tags=59%, list=18%, signal=72%
GSE3982_CENT_MEMORY_CD4_TCELL_VS_TH2_DN	GSE3982_CENT_MEMORY_CD4_TCELL_VS_TH2_DN		189	-0.577961	-2.25824	0	0	0	4795	tags=57%, list=15%, signal=66%
GSE3982_MEMORY_CD4_TCELL_VS_TH2_DN	GSE3982_MEMORY_CD4_TCELL_VS_TH2_DN		192	-0.581464	-2.25783	0	0	0	4567	tags=57%, list=15%, signal=67%
REACTOME_MITOTIC_G1_G1_S_PHASES	REACTOME_MITOTIC_G1_G1_S_PHASES		131	-0.606947	-2.25684	0	0	0	4838	tags=56%, list=15%, signal=66%
REACTOME_CDT1_ASSOCIATION_WITH_THE_CDC6_ORC_ORIGIN_COMPLEX	REACTOME_CDT1_ASSOCIATION_WITH_THE_CDC6_ORC_ORIGIN_COMPLEX		53	-0.704184	-2.25635	0	0	0	4838	tags=62%, list=15%, signal=73%
GSE46606_UNSTIM_VS_CD40L_IL2_IL5_DAY1_STIMULATED_BCELL_DN	GSE46606_UNSTIM_VS_CD40L_IL2_IL5_DAY1_STIMULATED_BCELL_DN		182	-0.585549	-2.25567	0	0	0	3825	tags=54%, list=12%, signal=62%
GSE40274_CTRL_VS_SATB1_TRANSDUCED_ACTIVATED_CD4_TCELL_DN	GSE40274_CTRL_VS_SATB1_TRANSDUCED_ACTIVATED_CD4_TCELL_DN		161	-0.591084	-2.25513	0	0	0	4228	tags=52%, list=13%, signal=59%
NAKAMURA_TUMOR_ZONE_PERIPHERAL_VS_CENTRAL_UP	NAKAMURA_TUMOR_ZONE_PERIPHERAL_VS_CENTRAL_UP		263	-0.55343	-2.25454	0	0	0	3753	tags=44%, list=12%, signal=50%
GSE28726_ACT_CD4_TCELL_VS_ACT_VA24NEG_NKTCELL_UP	GSE28726_ACT_CD4_TCELL_VS_ACT_VA24NEG_NKTCELL_UP		190	-0.580618	-2.25321	0	0	0	4052	tags=51%, list=13%, signal=58%
REACTOME_CHOLESTEROL_BIOSYNTHESIS	REACTOME_CHOLESTEROL_BIOSYNTHESIS		21	-0.848542	-2.25077	0	0	0	2225	tags=71%, list=7%, signal=77%
GSE21927_GMCSF_IL6_VS_GMCSF_GCSF_TREATED_BONE_MARROW_DN	GSE21927_GMCSF_IL6_VS_GMCSF_GCSF_TREATED_BONE_MARROW_DN		194	-0.583602	-2.24841	0	0	0	4948	tags=58%, list=16%, signal=68%
HESS_TARGETS_OF_HOXA9_AND_MEIS1_UP	HESS_TARGETS_OF_HOXA9_AND_MEIS1_UP		60	-0.677626	-2.24464	0	0	0	4357	tags=68%, list=14%, signal=79%
REACTOME_ACTIVATION_OF_ATR_IN_RESPONSE_TO_REPLICATION_STRESS	REACTOME_ACTIVATION_OF_ATR_IN_RESPONSE_TO_REPLICATION_STRESS		35	-0.754289	-2.24205	0	0	0	3017	tags=60%, list=10%, signal=66%
TOYOTA_TARGETS_OF_MIR34B_AND_MIR34C	TOYOTA_TARGETS_OF_MIR34B_AND_MIR34C		422	-0.533808	-2.24181	0	0	0	5055	tags=52%, list=16%, signal=61%
GSE28726_NAIVE_VS_ACTIVATED_VA24NEG_NKTCELL_UP	GSE28726_NAIVE_VS_ACTIVATED_VA24NEG_NKTCELL_UP		190	-0.574207	-2.23911	0	0	0	4943	tags=58%, list=16%, signal=68%
GSE14415_NATURAL_TREG_VS_TCONV_DN	GSE14415_NATURAL_TREG_VS_TCONV_DN		168	-0.582921	-2.23877	0	0	0	4795	tags=55%, list=15%, signal=65%
STK33_DN	STK33_DN		256	-0.554942	-2.23549	0	0	0	3100	tags=36%, list=10%, signal=40%
GNF2_NS	GNF2_NS		40	-0.735327	-2.23545	0	0	0	5593	tags=85%, list=18%, signal=103%
DANG_MYC_TARGETS_UP	DANG_MYC_TARGETS_UP		137	-0.604977	-2.23355	0	0	0	4102	tags=50%, list=13%, signal=57%
STEIN_ESRRA_TARGETS_RESPONSIVE_TO_ESTROGEN_DN	STEIN_ESRRA_TARGETS_RESPONSIVE_TO_ESTROGEN_DN		38	-0.727663	-2.2331	0	0	0	3386	tags=63%, list=11%, signal=71%
MORF_HDAC1	MORF_HDAC1		253	-0.548112	-2.2322	0	0	0	5723	tags=51%, list=18%, signal=61%
GSE24574_BCL6_LOW_TFH_VS_TCONV_CD4_TCELL_DN	GSE24574_BCL6_LOW_TFH_VS_TCONV_CD4_TCELL_DN		196	-0.571855	-2.22808	0	0	0	4052	tags=60%, list=13%, signal=68%
DUTERTRE_ESTRADIOL_RESPONSE_6HR_UP	DUTERTRE_ESTRADIOL_RESPONSE_6HR_UP		217	-0.567438	-2.22616	0	0	0	3024	tags=47%, list=10%, signal=51%
MORF_CUL1	MORF_CUL1		70	-0.665488	-2.22273	0	0	0	4615	tags=59%, list=15%, signal=68%
MORF_CDK2	MORF_CDK2		71	-0.656605	-2.22255	0	0	0	5505	tags=68%, list=18%, signal=82%
REACTOME_CDK_MEDIATED_PHOSPHORYLATION_AND_REMOVAL_OF_CDC6	REACTOME_CDK_MEDIATED_PHOSPHORYLATION_AND_REMOVAL_OF_CDC6		45	-0.703018	-2.22203	0	0	0	4838	tags=62%, list=15%, signal=73%
KAUFFMANN_DNA_REPAIR_GENES	KAUFFMANN_DNA_REPAIR_GENES		224	-0.565921	-2.22128	0	0	0	4636	tags=49%, list=15%, signal=57%
GSE21670_UNTREATED_VS_IL6_TREATED_STAT3_KO_CD4_TCELL_DN	GSE21670_UNTREATED_VS_IL6_TREATED_STAT3_KO_CD4_TCELL_DN		189	-0.566255	-2.22034	0	0	0	3704	tags=56%, list=12%, signal=63%
HORIUCHI_WTAP_TARGETS_DN	HORIUCHI_WTAP_TARGETS_DN		293	-0.551764	-2.22001	0	0	0	4755	tags=49%, list=15%, signal=57%
GSE41867_NAIVE_VS_DAY30_LCMV_ARMSTRONG_MEMORY_CD8_TCELL_DN	GSE41867_NAIVE_VS_DAY30_LCMV_ARMSTRONG_MEMORY_CD8_TCELL_DN		192	-0.569924	-2.21867	0	0	0	4481	tags=52%, list=14%, signal=60%
REACTOME_P53_INDEPENDENT_G1_S_DNA_DAMAGE_CHECKPOINT	REACTOME_P53_INDEPENDENT_G1_S_DNA_DAMAGE_CHECKPOINT		47	-0.702656	-2.21842	0	0	0	4838	tags=64%, list=15%, signal=75%
GSE13547_WT_VS_ZFX_KO_BCELL_ANTI_IGM_STIM_2H_UP	GSE13547_WT_VS_ZFX_KO_BCELL_ANTI_IGM_STIM_2H_UP		171	-0.57766	-2.21834	0	0	0	4357	tags=52%, list=14%, signal=60%
GSE22432_MULTIPOTENT_PROGENITOR_VS_CDC_DN	GSE22432_MULTIPOTENT_PROGENITOR_VS_CDC_DN		190	-0.568103	-2.217	0	0	0	4741	tags=49%, list=15%, signal=58%
GSE24634_TREG_VS_TCONV_POST_DAY7_IL4_CONVERSION_UP	GSE24634_TREG_VS_TCONV_POST_DAY7_IL4_CONVERSION_UP		183	-0.573351	-2.21557	0	0	0	4116	tags=55%, list=13%, signal=63%
GSE45739_NRAS_KO_VS_WT_ACD3_ACD28_STIM_CD4_TCELL_UP	GSE45739_NRAS_KO_VS_WT_ACD3_ACD28_STIM_CD4_TCELL_UP		184	-0.578686	-2.21474	0	0	0	4353	tags=54%, list=14%, signal=63%
REACTOME_TRANSPORT_OF_MATURE_MRNA_DERIVED_FROM_AN_INTRONLESS_TRANSCRIPT	REACTOME_TRANSPORT_OF_MATURE_MRNA_DERIVED_FROM_AN_INTRONLESS_TRANSCRIPT		32	-0.77398	-2.21439	0	0	0	5570	tags=81%, list=18%, signal=99%
GSE45739_NRAS_KO_VS_WT_UNSTIM_CD4_TCELL_UP	GSE45739_NRAS_KO_VS_WT_UNSTIM_CD4_TCELL_UP		184	-0.58031	-2.21341	0	0	0	2963	tags=54%, list=9%, signal=59%
FERRANDO_T_ALL_WITH_MLL_ENL_FUSION_DN	FERRANDO_T_ALL_WITH_MLL_ENL_FUSION_DN		84	-0.632788	-2.21291	0	0	0	4700	tags=56%, list=15%, signal=66%
GSE36476_CTRL_VS_TSST_ACT_16H_MEMORY_CD4_TCELL_OLD_DN	GSE36476_CTRL_VS_TSST_ACT_16H_MEMORY_CD4_TCELL_OLD_DN		189	-0.567154	-2.20965	0	0	0	4508	tags=54%, list=14%, signal=63%
RNA_SPLICING	RNA_SPLICING		91	-0.619697	-2.20916	0	0	0	5605	tags=56%, list=18%, signal=68%
GSE10239_NAIVE_VS_DAY4.5_EFF_CD8_TCELL_DN	GSE10239_NAIVE_VS_DAY4.5_EFF_CD8_TCELL_DN		190	-0.559471	-2.20891	0	0	0	3961	tags=52%, list=13%, signal=59%
KARLSSON_TGFB1_TARGETS_UP	KARLSSON_TGFB1_TARGETS_UP		118	-0.606692	-2.20687	0	0	0	3424	tags=57%, list=11%, signal=63%
MORF_RAD21	MORF_RAD21		178	-0.562037	-2.20506	0	0	0	5534	tags=53%, list=18%, signal=64%
GNF2_TDG	GNF2_TDG		35	-0.748909	-2.20487	0	0	0	5271	tags=77%, list=17%, signal=93%
SANSOM_APC_TARGETS_REQUIRE_MYC	SANSOM_APC_TARGETS_REQUIRE_MYC		191	-0.562269	-2.20479	0	0	0	4144	tags=48%, list=13%, signal=55%
ELVIDGE_HYPOXIA_DN	ELVIDGE_HYPOXIA_DN		136	-0.592847	-2.20378	0	0	0	4710	tags=52%, list=15%, signal=61%
GSE22432_CDC_VS_COMMON_DC_PROGENITOR_DN	GSE22432_CDC_VS_COMMON_DC_PROGENITOR_DN		187	-0.574582	-2.20347	0	0	0	5072	tags=51%, list=16%, signal=61%
MITOCHONDRIAL_PART	MITOCHONDRIAL_PART		135	-0.587782	-2.20313	0	0	0	5811	tags=59%, list=18%, signal=71%
YAO_TEMPORAL_RESPONSE_TO_PROGESTERONE_CLUSTER_11	YAO_TEMPORAL_RESPONSE_TO_PROGESTERONE_CLUSTER_11		98	-0.629674	-2.20207	0	0	0	4041	tags=59%, list=13%, signal=68%
REACTOME_NEP_NS2_INTERACTS_WITH_THE_CELLULAR_EXPORT_MACHINERY	REACTOME_NEP_NS2_INTERACTS_WITH_THE_CELLULAR_EXPORT_MACHINERY		27	-0.781743	-2.20124	0	0	0	5562	tags=81%, list=18%, signal=99%
REACTOME_CYTOSOLIC_TRNA_AMINOACYLATION	REACTOME_CYTOSOLIC_TRNA_AMINOACYLATION		24	-0.806886	-2.20108	0	0	0	4136	tags=83%, list=13%, signal=96%
GSE15930_NAIVE_VS_72H_IN_VITRO_STIM_TRICHOSTATINA_CD8_TCELL_DN	GSE15930_NAIVE_VS_72H_IN_VITRO_STIM_TRICHOSTATINA_CD8_TCELL_DN		190	-0.572308	-2.20078	0	0	0	5083	tags=55%, list=16%, signal=66%
GSE23568_CTRL_VS_ID3_TRANSDUCED_CD8_TCELL_DN	GSE23568_CTRL_VS_ID3_TRANSDUCED_CD8_TCELL_DN		186	-0.573082	-2.20037	0	0	0	4610	tags=55%, list=15%, signal=65%
REACTOME_TCA_CYCLE_AND_RESPIRATORY_ELECTRON_TRANSPORT	REACTOME_TCA_CYCLE_AND_RESPIRATORY_ELECTRON_TRANSPORT		116	-0.600578	-2.19903	0	3.35e-06	0.001	5025	tags=48%, list=16%, signal=57%
GSE7568_IL4_VS_IL4_AND_DEXAMETHASONE_TREATED_MACROPHAGE_UP	GSE7568_IL4_VS_IL4_AND_DEXAMETHASONE_TREATED_MACROPHAGE_UP		160	-0.578888	-2.19892	0	3.34e-06	0.001	5033	tags=54%, list=16%, signal=64%
GSE28726_ACT_CD4_TCELL_VS_ACT_NKTCELL_UP	GSE28726_ACT_CD4_TCELL_VS_ACT_NKTCELL_UP		189	-0.573756	-2.19853	0	3.33e-06	0.001	4043	tags=51%, list=13%, signal=59%
CHIANG_LIVER_CANCER_SUBCLASS_UNANNOTATED_DN	CHIANG_LIVER_CANCER_SUBCLASS_UNANNOTATED_DN		184	-0.55961	-2.19723	0	3.32e-06	0.001	4762	tags=50%, list=15%, signal=59%
LEE_EARLY_T_LYMPHOCYTE_UP	LEE_EARLY_T_LYMPHOCYTE_UP		101	-0.613282	-2.1967	0	3.31e-06	0.001	4741	tags=62%, list=15%, signal=73%
PUJANA_BRCA1_PCC_NETWORK	PUJANA_BRCA1_PCC_NETWORK		1553	-0.504275	-2.19541	0	3.3e-06	0.001	4552	tags=43%, list=14%, signal=48%
GSE20715_0H_VS_48H_OZONE_LUNG_DN	GSE20715_0H_VS_48H_OZONE_LUNG_DN		188	-0.56694	-2.19541	0	3.29e-06	0.001	4105	tags=47%, list=13%, signal=54%
RIBOSOME_BIOGENESIS_AND_ASSEMBLY	RIBOSOME_BIOGENESIS_AND_ASSEMBLY		18	-0.849338	-2.19398	0	3.28e-06	0.001	3959	tags=83%, list=13%, signal=95%
REACTOME_EXTENSION_OF_TELOMERES	REACTOME_EXTENSION_OF_TELOMERES		27	-0.791421	-2.19336	0	3.27e-06	0.001	4390	tags=85%, list=14%, signal=99%
BURTON_ADIPOGENESIS_4	BURTON_ADIPOGENESIS_4		42	-0.722825	-2.19255	0	3.27e-06	0.001	3568	tags=60%, list=11%, signal=67%
REACTOME_REGULATION_OF_ORNITHINE_DECARBOXYLASE_ODC	REACTOME_REGULATION_OF_ORNITHINE_DECARBOXYLASE_ODC		47	-0.701066	-2.19221	0	3.26e-06	0.001	6921	tags=72%, list=22%, signal=93%
MOOTHA_MITOCHONDRIA	MOOTHA_MITOCHONDRIA		421	-0.535977	-2.19172	0	3.25e-06	0.001	5406	tags=52%, list=17%, signal=61%
SHIPP_DLBCL_VS_FOLLICULAR_LYMPHOMA_UP	SHIPP_DLBCL_VS_FOLLICULAR_LYMPHOMA_UP		44	-0.707245	-2.19167	0	3.24e-06	0.001	3087	tags=61%, list=10%, signal=68%
ZHAN_MULTIPLE_MYELOMA_SUBGROUPS	ZHAN_MULTIPLE_MYELOMA_SUBGROUPS		30	-0.763323	-2.18933	0	3.23e-06	0.001	4072	tags=67%, list=13%, signal=77%
REACTOME_TRANSPORT_OF_RIBONUCLEOPROTEINS_INTO_THE_HOST_NUCLEUS	REACTOME_TRANSPORT_OF_RIBONUCLEOPROTEINS_INTO_THE_HOST_NUCLEUS		27	-0.778468	-2.18867	0	3.22e-06	0.001	5562	tags=78%, list=18%, signal=94%
MODULE_252	MODULE_252		228	-0.549648	-2.18821	0	3.21e-06	0.001	4633	tags=54%, list=15%, signal=62%
GSE15624_CTRL_VS_6H_HALOFUGINONE_TREATED_CD4_TCELL_DN	GSE15624_CTRL_VS_6H_HALOFUGINONE_TREATED_CD4_TCELL_DN		152	-0.590484	-2.18787	0	3.2e-06	0.001	4136	tags=51%, list=13%, signal=58%
GSE10273_HIGH_IL7_VS_HIGH_IL7_AND_IRF4_IN_IRF4_8_NULL_PRE_BCELL_UP	GSE10273_HIGH_IL7_VS_HIGH_IL7_AND_IRF4_IN_IRF4_8_NULL_PRE_BCELL_UP		178	-0.563643	-2.18556	0	3.2e-06	0.001	4873	tags=48%, list=15%, signal=57%
HALLMARK_OXIDATIVE_PHOSPHORYLATION	HALLMARK_OXIDATIVE_PHOSPHORYLATION		197	-0.557539	-2.18521	0	3.19e-06	0.001	4990	tags=50%, list=16%, signal=59%
REACTOME_CLEAVAGE_OF_GROWING_TRANSCRIPT_IN_THE_TERMINATION_REGION_	REACTOME_CLEAVAGE_OF_GROWING_TRANSCRIPT_IN_THE_TERMINATION_REGION_		42	-0.711954	-2.1846	0	3.18e-06	0.001	5570	tags=67%, list=18%, signal=81%
COLLER_MYC_TARGETS_UP	COLLER_MYC_TARGETS_UP		25	-0.78727	-2.18415	0	3.17e-06	0.001	2307	tags=60%, list=7%, signal=65%
GSE36476_CTRL_VS_TSST_ACT_16H_MEMORY_CD4_TCELL_YOUNG_DN	GSE36476_CTRL_VS_TSST_ACT_16H_MEMORY_CD4_TCELL_YOUNG_DN		186	-0.550994	-2.18233	0	3.16e-06	0.001	4052	tags=50%, list=13%, signal=57%
LINDGREN_BLADDER_CANCER_CLUSTER_3_UP	LINDGREN_BLADDER_CANCER_CLUSTER_3_UP		307	-0.534445	-2.18141	0	3.15e-06	0.001	4017	tags=48%, list=13%, signal=54%
GSE19825_CD24LOW_VS_IL2RA_HIGH_DAY3_EFF_CD8_TCELL_DN	GSE19825_CD24LOW_VS_IL2RA_HIGH_DAY3_EFF_CD8_TCELL_DN		190	-0.562005	-2.17973	0	3.14e-06	0.001	4810	tags=48%, list=15%, signal=56%
GSE5142_HTERT_TRANSDUCED_VS_CTRL_CD8_TCELL_LATE_PASSAGE_CLONE_UP	GSE5142_HTERT_TRANSDUCED_VS_CTRL_CD8_TCELL_LATE_PASSAGE_CLONE_UP		194	-0.561854	-2.17914	0	3.14e-06	0.001	3792	tags=53%, list=12%, signal=59%
AMUNDSON_GAMMA_RADIATION_RESPONSE	AMUNDSON_GAMMA_RADIATION_RESPONSE		39	-0.721024	-2.17879	0	3.13e-06	0.001	4017	tags=74%, list=13%, signal=85%
REACTOME_APC_C_CDC20_MEDIATED_DEGRADATION_OF_MITOTIC_PROTEINS	REACTOME_APC_C_CDC20_MEDIATED_DEGRADATION_OF_MITOTIC_PROTEINS		64	-0.652442	-2.17515	0	3.12e-06	0.001	4937	tags=58%, list=16%, signal=68%
HALLMARK_MTORC1_SIGNALING	HALLMARK_MTORC1_SIGNALING		198	-0.555204	-2.1744	0	3.11e-06	0.001	4036	tags=55%, list=13%, signal=63%
GNF2_RPA1	GNF2_RPA1		28	-0.751937	-2.17388	0	3.1e-06	0.001	5271	tags=64%, list=17%, signal=77%
MODULE_337	MODULE_337		59	-0.656163	-2.17071	0	3.09e-06	0.001	5033	tags=64%, list=16%, signal=77%
VERNELL_RETINOBLASTOMA_PATHWAY_UP	VERNELL_RETINOBLASTOMA_PATHWAY_UP		69	-0.639304	-2.16867	0	3.09e-06	0.001	4150	tags=57%, list=13%, signal=65%
GSE36888_UNTREATED_VS_IL2_TREATED_TCELL_6H_DN	GSE36888_UNTREATED_VS_IL2_TREATED_TCELL_6H_DN		189	-0.558028	-2.16808	0	3.08e-06	0.001	5118	tags=50%, list=16%, signal=60%
GSE43863_TH1_VS_LY6C_LOW_CXCR5NEG_EFFECTOR_CD4_TCELL_UP	GSE43863_TH1_VS_LY6C_LOW_CXCR5NEG_EFFECTOR_CD4_TCELL_UP		192	-0.563531	-2.16759	0	3.07e-06	0.001	4549	tags=52%, list=14%, signal=60%
MODULE_61	MODULE_61		46	-0.692672	-2.16725	0	3.06e-06	0.001	5889	tags=65%, list=19%, signal=80%
MEMBRANE_ENCLOSED_LUMEN	MEMBRANE_ENCLOSED_LUMEN		437	-0.516189	-2.16604	0	3.06e-06	0.001	5302	tags=49%, list=17%, signal=58%
GNF2_BUB3	GNF2_BUB3		28	-0.782297	-2.1654	0	3.05e-06	0.001	4390	tags=68%, list=14%, signal=79%
MORF_AP3D1	MORF_AP3D1		128	-0.593023	-2.16413	0	3.04e-06	0.001	5695	tags=52%, list=18%, signal=63%
SMID_BREAST_CANCER_LUMINAL_A_DN	SMID_BREAST_CANCER_LUMINAL_A_DN		16	-0.879228	-2.16293	0	3.03e-06	0.001	1756	tags=81%, list=6%, signal=86%
GSE17301_IFNA2_VS_IFNA5_STIM_ACD3_ACD28_ACT_CD8_TCELL_DN	GSE17301_IFNA2_VS_IFNA5_STIM_ACD3_ACD28_ACT_CD8_TCELL_DN		183	-0.564973	-2.16285	0	3.02e-06	0.001	4265	tags=45%, list=14%, signal=52%
ORGANELLE_LUMEN	ORGANELLE_LUMEN		437	-0.516189	-2.16234	0	3.02e-06	0.001	5302	tags=49%, list=17%, signal=58%
REACTOME_INTERACTIONS_OF_VPR_WITH_HOST_CELLULAR_PROTEINS	REACTOME_INTERACTIONS_OF_VPR_WITH_HOST_CELLULAR_PROTEINS		32	-0.756418	-2.16212	0	3.01e-06	0.001	5562	tags=72%, list=18%, signal=87%
REACTOME_GLUCOSE_TRANSPORT	REACTOME_GLUCOSE_TRANSPORT		36	-0.7168	-2.16147	0	3e-06	0.001	5562	tags=72%, list=18%, signal=88%
MITOCHONDRION	MITOCHONDRION		321	-0.531491	-2.1593	0	2.99e-06	0.001	4978	tags=50%, list=16%, signal=58%
REACTOME_DESTABILIZATION_OF_MRNA_BY_AUF1_HNRNP_D0	REACTOME_DESTABILIZATION_OF_MRNA_BY_AUF1_HNRNP_D0		49	-0.679709	-2.15797	0	2.99e-06	0.001	4838	tags=61%, list=15%, signal=72%
GSE18791_CTRL_VS_NEWCASTLE_VIRUS_DC_8H_UP	GSE18791_CTRL_VS_NEWCASTLE_VIRUS_DC_8H_UP		186	-0.56202	-2.15706	0	2.98e-06	0.001	4771	tags=49%, list=15%, signal=58%
REACTOME_SCF_BETA_TRCP_MEDIATED_DEGRADATION_OF_EMI1	REACTOME_SCF_BETA_TRCP_MEDIATED_DEGRADATION_OF_EMI1		48	-0.676111	-2.15655	0	2.97e-06	0.001	6149	tags=69%, list=20%, signal=85%
REACTOME_ORC1_REMOVAL_FROM_CHROMATIN	REACTOME_ORC1_REMOVAL_FROM_CHROMATIN		64	-0.651771	-2.1565	0	2.96e-06	0.001	4838	tags=61%, list=15%, signal=72%
KEGG_SPLICEOSOME	KEGG_SPLICEOSOME		125	-0.584611	-2.15595	0	2.96e-06	0.001	5000	tags=51%, list=16%, signal=61%
GSE35543_IN_VIVO_NTREG_VS_CONVERTED_EX_ITREG_UP	GSE35543_IN_VIVO_NTREG_VS_CONVERTED_EX_ITREG_UP		156	-0.569675	-2.15589	0	2.95e-06	0.001	4591	tags=44%, list=15%, signal=52%
PID_ATR_PATHWAY	PID_ATR_PATHWAY		39	-0.714848	-2.1557	0	2.94e-06	0.001	5274	tags=69%, list=17%, signal=83%
REACTOME_MITOTIC_PROMETAPHASE	REACTOME_MITOTIC_PROMETAPHASE		83	-0.633507	-2.15468	0	2.93e-06	0.001	5825	tags=66%, list=19%, signal=81%
MORF_CCNF	MORF_CCNF		76	-0.644071	-2.15463	0	2.93e-06	0.001	4447	tags=61%, list=14%, signal=70%
GSE40274_CTRL_VS_FOXP3_AND_EOS_TRANSDUCED_ACTIVATED_CD4_TCELL_DN	GSE40274_CTRL_VS_FOXP3_AND_EOS_TRANSDUCED_ACTIVATED_CD4_TCELL_DN		140	-0.576508	-2.15456	0	2.92e-06	0.001	4355	tags=48%, list=14%, signal=55%
GSE43863_NAIVE_VS_MEMORY_TFH_CD4_TCELL_D150_LCMV_DN	GSE43863_NAIVE_VS_MEMORY_TFH_CD4_TCELL_D150_LCMV_DN		187	-0.559168	-2.1543	0	2.91e-06	0.001	3214	tags=52%, list=10%, signal=57%
GSE3982_MEMORY_CD4_TCELL_VS_TH1_DN	GSE3982_MEMORY_CD4_TCELL_VS_TH1_DN		191	-0.555452	-2.15261	0	5.8e-06	0.002	4115	tags=52%, list=13%, signal=60%
RIBONUCLEOPROTEIN_COMPLEX_BIOGENESIS_AND_ASSEMBLY	RIBONUCLEOPROTEIN_COMPLEX_BIOGENESIS_AND_ASSEMBLY		83	-0.631539	-2.15241	0	5.79e-06	0.002	4663	tags=53%, list=15%, signal=62%
PRAMOONJAGO_SOX4_TARGETS_DN	PRAMOONJAGO_SOX4_TARGETS_DN		49	-0.685185	-2.15094	0	5.77e-06	0.002	4936	tags=55%, list=16%, signal=65%
GSE17974_CTRL_VS_ACT_IL4_AND_ANTI_IL12_48H_CD4_TCELL_DN	GSE17974_CTRL_VS_ACT_IL4_AND_ANTI_IL12_48H_CD4_TCELL_DN		189	-0.552969	-2.14937	0	5.76e-06	0.002	5112	tags=52%, list=16%, signal=62%
BENPORATH_ES_2	BENPORATH_ES_2		35	-0.710923	-2.14713	0	5.74e-06	0.002	1850	tags=46%, list=6%, signal=49%
HALLMARK_UNFOLDED_PROTEIN_RESPONSE	HALLMARK_UNFOLDED_PROTEIN_RESPONSE		111	-0.596788	-2.1462	0	5.73e-06	0.002	4073	tags=50%, list=13%, signal=57%
KAUFFMANN_DNA_REPLICATION_GENES	KAUFFMANN_DNA_REPLICATION_GENES		141	-0.569746	-2.14526	0	5.72e-06	0.002	5356	tags=55%, list=17%, signal=66%
EGUCHI_CELL_CYCLE_RB1_TARGETS	EGUCHI_CELL_CYCLE_RB1_TARGETS		23	-0.80557	-2.14366	0	5.7e-06	0.002	4567	tags=78%, list=15%, signal=91%
KEGG_AMINOACYL_TRNA_BIOSYNTHESIS	KEGG_AMINOACYL_TRNA_BIOSYNTHESIS		41	-0.70841	-2.14342	0	5.69e-06	0.002	4136	tags=71%, list=13%, signal=81%
GSE6259_FLT3L_INDUCED_33D1_POS_DC_VS_BCELL_UP	GSE6259_FLT3L_INDUCED_33D1_POS_DC_VS_BCELL_UP		180	-0.550657	-2.14338	0	5.68e-06	0.002	4713	tags=52%, list=15%, signal=61%
CHIANG_LIVER_CANCER_SUBCLASS_PROLIFERATION_UP	CHIANG_LIVER_CANCER_SUBCLASS_PROLIFERATION_UP		167	-0.555867	-2.14112	0	5.66e-06	0.002	3490	tags=53%, list=11%, signal=60%
MOLENAAR_TARGETS_OF_CCND1_AND_CDK4_DN	MOLENAAR_TARGETS_OF_CCND1_AND_CDK4_DN		53	-0.662223	-2.14087	0	5.65e-06	0.002	5132	tags=68%, list=16%, signal=81%
GSE3982_BASOPHIL_VS_TH2_DN	GSE3982_BASOPHIL_VS_TH2_DN		181	-0.55901	-2.1396	0	5.64e-06	0.002	4322	tags=51%, list=14%, signal=59%
GSE36888_UNTREATED_VS_IL2_TREATED_STAT5_AB_KNOCKIN_TCELL_6H_DN	GSE36888_UNTREATED_VS_IL2_TREATED_STAT5_AB_KNOCKIN_TCELL_6H_DN		189	-0.55267	-2.13876	0	5.62e-06	0.002	3754	tags=49%, list=12%, signal=56%
RHODES_CANCER_META_SIGNATURE	RHODES_CANCER_META_SIGNATURE		64	-0.651499	-2.13804	0	5.61e-06	0.002	5505	tags=70%, list=18%, signal=85%
SCIAN_CELL_CYCLE_TARGETS_OF_TP53_AND_TP73_DN	SCIAN_CELL_CYCLE_TARGETS_OF_TP53_AND_TP73_DN		22	-0.810926	-2.13771	0	5.6e-06	0.002	3112	tags=77%, list=10%, signal=86%
REACTOME_REGULATION_OF_GLUCOKINASE_BY_GLUCOKINASE_REGULATORY_PROTEIN	REACTOME_REGULATION_OF_GLUCOKINASE_BY_GLUCOKINASE_REGULATORY_PROTEIN		26	-0.774918	-2.13655	0	5.58e-06	0.002	5562	tags=77%, list=18%, signal=93%
RRNA_METABOLIC_PROCESS	RRNA_METABOLIC_PROCESS		16	-0.864491	-2.13574	0	5.57e-06	0.002	3959	tags=81%, list=13%, signal=93%
YAO_TEMPORAL_RESPONSE_TO_PROGESTERONE_CLUSTER_17	YAO_TEMPORAL_RESPONSE_TO_PROGESTERONE_CLUSTER_17		173	-0.559069	-2.13509	0	5.56e-06	0.002	5517	tags=60%, list=18%, signal=72%
ELVIDGE_HIF1A_TARGETS_UP	ELVIDGE_HIF1A_TARGETS_UP		61	-0.640666	-2.13468	0	5.54e-06	0.002	4678	tags=61%, list=15%, signal=71%
BLUM_RESPONSE_TO_SALIRASIB_DN	BLUM_RESPONSE_TO_SALIRASIB_DN		337	-0.519587	-2.13444	0	5.53e-06	0.002	4170	tags=48%, list=13%, signal=55%
REACTOME_MRNA_SPLICING	REACTOME_MRNA_SPLICING		107	-0.5988	-2.13436	0	5.52e-06	0.002	5605	tags=55%, list=18%, signal=67%
GSE2770_UNTREATED_VS_ACT_CD4_TCELL_48H_UP	GSE2770_UNTREATED_VS_ACT_CD4_TCELL_48H_UP		183	-0.556458	-2.13406	0	5.5e-06	0.002	5471	tags=52%, list=17%, signal=62%
FURUKAWA_DUSP6_TARGETS_PCI35_DN	FURUKAWA_DUSP6_TARGETS_PCI35_DN		65	-0.64413	-2.13042	0	8.29e-06	0.003	3942	tags=55%, list=13%, signal=63%
TONKS_TARGETS_OF_RUNX1_RUNX1T1_FUSION_MONOCYTE_UP	TONKS_TARGETS_OF_RUNX1_RUNX1T1_FUSION_MONOCYTE_UP		191	-0.549474	-2.13012	0	8.27e-06	0.003	3066	tags=46%, list=10%, signal=50%
REACTOME_AUTODEGRADATION_OF_THE_E3_UBIQUITIN_LIGASE_COP1	REACTOME_AUTODEGRADATION_OF_THE_E3_UBIQUITIN_LIGASE_COP1		46	-0.668759	-2.12939	0	8.25e-06	0.003	4838	tags=61%, list=15%, signal=72%
FERREIRA_EWINGS_SARCOMA_UNSTABLE_VS_STABLE_UP	FERREIRA_EWINGS_SARCOMA_UNSTABLE_VS_STABLE_UP		156	-0.563349	-2.12912	0	8.23e-06	0.003	4656	tags=58%, list=15%, signal=67%
MORF_RAD23B	MORF_RAD23B		174	-0.54834	-2.12847	0	8.21e-06	0.003	5534	tags=52%, list=18%, signal=63%
RHEIN_ALL_GLUCOCORTICOID_THERAPY_DN	RHEIN_ALL_GLUCOCORTICOID_THERAPY_DN		352	-0.524243	-2.12806	0	8.2e-06	0.003	4690	tags=55%, list=15%, signal=64%
GSE1460_INTRATHYMIC_T_PROGENITOR_VS_NAIVE_CD4_TCELL_ADULT_BLOOD_UP	GSE1460_INTRATHYMIC_T_PROGENITOR_VS_NAIVE_CD4_TCELL_ADULT_BLOOD_UP		190	-0.551994	-2.12806	0	8.18e-06	0.003	5801	tags=56%, list=18%, signal=69%
GSE36826_WT_VS_IL1R_KO_SKIN_STAPH_AUREUS_INF_UP	GSE36826_WT_VS_IL1R_KO_SKIN_STAPH_AUREUS_INF_UP		192	-0.546253	-2.12695	0	8.16e-06	0.003	3855	tags=54%, list=12%, signal=61%
GSE32533_WT_VS_MIR17_OVEREXPRESS_ACT_CD4_TCELL_UP	GSE32533_WT_VS_MIR17_OVEREXPRESS_ACT_CD4_TCELL_UP		180	-0.549312	-2.12685	0	8.14e-06	0.003	3363	tags=44%, list=11%, signal=49%
GSE40274_CTRL_VS_FOXP3_TRANSDUCED_ACTIVATED_CD4_TCELL_UP	GSE40274_CTRL_VS_FOXP3_TRANSDUCED_ACTIVATED_CD4_TCELL_UP		189	-0.550026	-2.12559	0	8.12e-06	0.003	4157	tags=50%, list=13%, signal=58%
REACTOME_CROSS_PRESENTATION_OF_SOLUBLE_EXOGENOUS_ANTIGENS_ENDOSOMES	REACTOME_CROSS_PRESENTATION_OF_SOLUBLE_EXOGENOUS_ANTIGENS_ENDOSOMES		44	-0.701409	-2.1241	0	8.1e-06	0.003	4838	tags=64%, list=15%, signal=75%
MORF_ANP32B	MORF_ANP32B		197	-0.545399	-2.12403	0	8.08e-06	0.003	5271	tags=45%, list=17%, signal=54%
GSE3039_B2_VS_B1_BCELL_DN	GSE3039_B2_VS_B1_BCELL_DN		185	-0.546063	-2.12369	0	8.07e-06	0.003	3538	tags=42%, list=11%, signal=47%
REACTOME_DNA_REPAIR	REACTOME_DNA_REPAIR		104	-0.590872	-2.12265	0	8.05e-06	0.003	4756	tags=56%, list=15%, signal=65%
REACTOME_REGULATION_OF_MITOTIC_CELL_CYCLE	REACTOME_REGULATION_OF_MITOTIC_CELL_CYCLE		76	-0.621488	-2.12122	0	1.35e-05	0.005	4937	tags=57%, list=16%, signal=67%
NUCLEOLAR_PART	NUCLEOLAR_PART		18	-0.840475	-2.12037	0.00251256	1.61e-05	0.006	2752	tags=83%, list=9%, signal=91%
GSE40274_CTRL_VS_FOXP3_AND_XBP1_TRANSDUCED_ACTIVATED_CD4_TCELL_UP	GSE40274_CTRL_VS_FOXP3_AND_XBP1_TRANSDUCED_ACTIVATED_CD4_TCELL_UP		153	-0.562705	-2.12026	0	1.61e-05	0.006	4959	tags=54%, list=16%, signal=64%
TRNA_METABOLIC_PROCESS	TRNA_METABOLIC_PROCESS		19	-0.825374	-2.12022	0	1.61e-05	0.006	3959	tags=79%, list=13%, signal=90%
GSE31082_DN_VS_CD4_SP_THYMOCYTE_UP	GSE31082_DN_VS_CD4_SP_THYMOCYTE_UP		187	-0.547101	-2.11945	0	1.6e-05	0.006	5471	tags=57%, list=17%, signal=69%
GSE39110_DAY3_VS_DAY6_POST_IMMUNIZATION_CD8_TCELL_DN	GSE39110_DAY3_VS_DAY6_POST_IMMUNIZATION_CD8_TCELL_DN		181	-0.546447	-2.11753	0	2.12e-05	0.008	4969	tags=57%, list=16%, signal=67%
GNF2_DENR	GNF2_DENR		51	-0.656061	-2.11724	0	2.12e-05	0.008	5315	tags=53%, list=17%, signal=64%
MORF_MTA1	MORF_MTA1		102	-0.591552	-2.11685	0	2.11e-05	0.008	4506	tags=49%, list=14%, signal=57%
LI_DCP2_BOUND_MRNA	LI_DCP2_BOUND_MRNA		89	-0.61056	-2.11479	0	2.11e-05	0.008	4210	tags=53%, list=13%, signal=61%
IVANOVA_HEMATOPOIESIS_INTERMEDIATE_PROGENITOR	IVANOVA_HEMATOPOIESIS_INTERMEDIATE_PROGENITOR		141	-0.56751	-2.11407	0	2.1e-05	0.008	4508	tags=50%, list=14%, signal=58%
GSE18791_CTRL_VS_NEWCASTLE_VIRUS_DC_12H_UP	GSE18791_CTRL_VS_NEWCASTLE_VIRUS_DC_12H_UP		187	-0.545868	-2.11394	0	2.1e-05	0.008	4805	tags=48%, list=15%, signal=56%
GSE29617_CTRL_VS_TIV_FLU_VACCINE_PBMC_2008_DN	GSE29617_CTRL_VS_TIV_FLU_VACCINE_PBMC_2008_DN		185	-0.53845	-2.11383	0	2.09e-05	0.008	4220	tags=43%, list=13%, signal=49%
MORF_DEAF1	MORF_DEAF1		55	-0.640012	-2.11326	0	2.09e-05	0.008	3907	tags=64%, list=12%, signal=73%
GSE23114_PERITONEAL_CAVITY_B1A_BCELL_VS_SPLEEN_BCELL_DN	GSE23114_PERITONEAL_CAVITY_B1A_BCELL_VS_SPLEEN_BCELL_DN		193	-0.54078	-2.11223	0	2.08e-05	0.008	3467	tags=49%, list=11%, signal=54%
REACTOME_CELL_CYCLE	REACTOME_CELL_CYCLE		387	-0.518352	-2.11219	0	2.08e-05	0.008	4706	tags=51%, list=15%, signal=59%
REACTOME_APC_C_CDH1_MEDIATED_DEGRADATION_OF_CDC20_AND_OTHER_APC_C_CDH1_TARGETED_PROTEINS_IN_LATE_MITOSIS_EARLY_G1	REACTOME_APC_C_CDH1_MEDIATED_DEGRADATION_OF_CDC20_AND_OTHER_APC_C_CDH1_TARGETED_PROTEINS_IN_LATE_MITOSIS_EARLY_G1		63	-0.650406	-2.11185	0	2.07e-05	0.008	4937	tags=59%, list=16%, signal=70%
PID_FANCONI_PATHWAY	PID_FANCONI_PATHWAY		47	-0.680975	-2.1116	0	2.07e-05	0.008	5274	tags=70%, list=17%, signal=84%
GSE8921_UNSTIM_0H_VS_TLR1_2_STIM_MONOCYTE_12H_UP	GSE8921_UNSTIM_0H_VS_TLR1_2_STIM_MONOCYTE_12H_UP		184	-0.542355	-2.10996	0	2.33e-05	0.009	4266	tags=48%, list=14%, signal=56%
GSE40274_FOXP3_VS_FOXP3_AND_EOS_TRANSDUCED_ACTIVATED_CD4_TCELL_DN	GSE40274_FOXP3_VS_FOXP3_AND_EOS_TRANSDUCED_ACTIVATED_CD4_TCELL_DN		183	-0.541661	-2.10979	0	2.32e-05	0.009	4663	tags=51%, list=15%, signal=59%
MORF_USP5	MORF_USP5		49	-0.656732	-2.10823	0	2.82e-05	0.011	4447	tags=61%, list=14%, signal=71%
NUCLEAR_PART	NUCLEAR_PART		553	-0.496649	-2.10799	0	2.81e-05	0.011	5366	tags=47%, list=17%, signal=55%
XU_RESPONSE_TO_TRETINOIN_AND_NSC682994_DN	XU_RESPONSE_TO_TRETINOIN_AND_NSC682994_DN		15	-0.875634	-2.10793	0	2.8e-05	0.011	2730	tags=87%, list=9%, signal=95%
GSE41867_NAIVE_VS_EFFECTOR_CD8_TCELL_DN	GSE41867_NAIVE_VS_EFFECTOR_CD8_TCELL_DN		192	-0.541515	-2.10763	0	2.8e-05	0.011	4901	tags=52%, list=16%, signal=61%
MODULE_244	MODULE_244		183	-0.551145	-2.10579	0	2.79e-05	0.011	4330	tags=52%, list=14%, signal=60%
GSE45365_WT_VS_IFNAR_KO_BCELL_MCMV_INFECTION_DN	GSE45365_WT_VS_IFNAR_KO_BCELL_MCMV_INFECTION_DN		158	-0.556104	-2.10574	0	2.79e-05	0.011	4610	tags=46%, list=15%, signal=54%
GSE24574_BCL6_HIGH_VS_LOW_TFH_CD4_TCELL_DN	GSE24574_BCL6_HIGH_VS_LOW_TFH_CD4_TCELL_DN		198	-0.542799	-2.10479	0	2.78e-05	0.011	4052	tags=55%, list=13%, signal=62%
WINTER_HYPOXIA_UP	WINTER_HYPOXIA_UP		86	-0.609514	-2.10403	0	2.77e-05	0.011	4894	tags=52%, list=16%, signal=62%
GSE17974_CTRL_VS_ACT_IL4_AND_ANTI_IL12_6H_CD4_TCELL_DN	GSE17974_CTRL_VS_ACT_IL4_AND_ANTI_IL12_6H_CD4_TCELL_DN		174	-0.543304	-2.10037	0	3.03e-05	0.012	3433	tags=44%, list=11%, signal=49%
GSE21927_SPLEEN_VS_4T1_TUMOR_MONOCYTE_BALBC_DN	GSE21927_SPLEEN_VS_4T1_TUMOR_MONOCYTE_BALBC_DN		171	-0.543221	-2.09961	0	3.02e-05	0.012	4486	tags=44%, list=14%, signal=52%
MOOTHA_HUMAN_MITODB_6_2002	MOOTHA_HUMAN_MITODB_6_2002		404	-0.511804	-2.09769	0	3.27e-05	0.013	5639	tags=52%, list=18%, signal=63%
MORF_DDB1	MORF_DDB1		239	-0.529296	-2.09764	0	3.26e-05	0.013	4567	tags=46%, list=15%, signal=53%
REACTOME_RESPIRATORY_ELECTRON_TRANSPORT_ATP_SYNTHESIS_BY_CHEMIOSMOTIC_COUPLING_AND_HEAT_PRODUCTION_BY_UNCOUPLING_PROTEINS_	REACTOME_RESPIRATORY_ELECTRON_TRANSPORT_ATP_SYNTHESIS_BY_CHEMIOSMOTIC_COUPLING_AND_HEAT_PRODUCTION_BY_UNCOUPLING_PROTEINS_		81	-0.594666	-2.0955	0	3.51e-05	0.014	7129	tags=60%, list=23%, signal=78%
GCM_PPP1CC	GCM_PPP1CC		56	-0.642248	-2.09529	0	3.5e-05	0.014	5626	tags=63%, list=18%, signal=76%
MODULE_91	MODULE_91		37	-0.699095	-2.09497	0	3.5e-05	0.014	5315	tags=68%, list=17%, signal=81%
MORF_PPP1CA	MORF_PPP1CA		168	-0.548227	-2.09473	0	3.49e-05	0.014	5534	tags=51%, list=18%, signal=62%
MALONEY_RESPONSE_TO_17AAG_DN	MALONEY_RESPONSE_TO_17AAG_DN		78	-0.607142	-2.09377	0	3.48e-05	0.014	4650	tags=55%, list=15%, signal=65%
GSE43863_NAIVE_VS_MEMORY_LY6C_INT_CXCR5POS_CD4_TCELL_D150_LCMV_DN	GSE43863_NAIVE_VS_MEMORY_LY6C_INT_CXCR5POS_CD4_TCELL_D150_LCMV_DN		190	-0.542171	-2.09199	0	3.47e-05	0.014	4315	tags=49%, list=14%, signal=57%
REACTOME_MRNA_SPLICING_MINOR_PATHWAY	REACTOME_MRNA_SPLICING_MINOR_PATHWAY		43	-0.678719	-2.0876	0	3.47e-05	0.014	5320	tags=60%, list=17%, signal=73%
YU_MYC_TARGETS_UP	YU_MYC_TARGETS_UP		40	-0.684831	-2.08455	0	3.96e-05	0.016	3442	tags=70%, list=11%, signal=79%
NUCLEAR_LUMEN	NUCLEAR_LUMEN		369	-0.502229	-2.08198	0	4.44e-05	0.018	5302	tags=47%, list=17%, signal=56%
GSE27859_DC_VS_CD11C_INT_F480_INT_DC_DN	GSE27859_DC_VS_CD11C_INT_F480_INT_DC_DN		194	-0.536292	-2.08155	0	4.43e-05	0.018	4516	tags=52%, list=14%, signal=60%
PROTEASOME_COMPLEX	PROTEASOME_COMPLEX		23	-0.771418	-2.08094	0	4.66e-05	0.019	3341	tags=61%, list=11%, signal=68%
GSE14415_TCONV_VS_FOXP3_KO_INDUCED_TREG_UP	GSE14415_TCONV_VS_FOXP3_KO_INDUCED_TREG_UP		155	-0.54461	-2.08015	0	4.65e-05	0.019	3865	tags=46%, list=12%, signal=53%
GSE43863_TH1_VS_TFH_MEMORY_CD4_TCELL_UP	GSE43863_TH1_VS_TFH_MEMORY_CD4_TCELL_UP		195	-0.535852	-2.07879	0	4.64e-05	0.019	4105	tags=52%, list=13%, signal=59%
LY_AGING_OLD_DN	LY_AGING_OLD_DN		56	-0.633476	-2.07801	0	4.63e-05	0.019	5340	tags=75%, list=17%, signal=90%
GSE24634_IL4_VS_CTRL_TREATED_NAIVE_CD4_TCELL_DAY7_UP	GSE24634_IL4_VS_CTRL_TREATED_NAIVE_CD4_TCELL_DAY7_UP		187	-0.544088	-2.07667	0	4.62e-05	0.019	3807	tags=46%, list=12%, signal=52%
MODULE_198	MODULE_198		289	-0.512444	-2.07623	0	4.86e-05	0.02	4086	tags=46%, list=13%, signal=52%
MODULE_98	MODULE_98		372	-0.507281	-2.0734	0	5.58e-05	0.022	4690	tags=47%, list=15%, signal=54%
REN_BOUND_BY_E2F	REN_BOUND_BY_E2F		60	-0.621214	-2.07255	0	5.57e-05	0.022	3428	tags=70%, list=11%, signal=78%
GSE10239_KLRG1INT_VS_KLRG1HIGH_EFF_CD8_TCELL_UP	GSE10239_KLRG1INT_VS_KLRG1HIGH_EFF_CD8_TCELL_UP		181	-0.547897	-2.06985	0	5.79e-05	0.023	4186	tags=43%, list=13%, signal=49%
RRNA_PROCESSING	RRNA_PROCESSING		15	-0.864495	-2.06824	0	6.27e-05	0.024	3959	tags=87%, list=13%, signal=99%
MODULE_17	MODULE_17		345	-0.505648	-2.06747	0	6.26e-05	0.024	4231	tags=51%, list=13%, signal=58%
PID_MYC_ACTIV_PATHWAY	PID_MYC_ACTIV_PATHWAY		78	-0.596788	-2.06277	0	6.49e-05	0.025	3331	tags=51%, list=11%, signal=57%
GSE3982_CENT_MEMORY_CD4_TCELL_VS_TH1_DN	GSE3982_CENT_MEMORY_CD4_TCELL_VS_TH1_DN		193	-0.537679	-2.06212	0	6.72e-05	0.026	4795	tags=55%, list=15%, signal=64%
WEST_ADRENOCORTICAL_TUMOR_UP	WEST_ADRENOCORTICAL_TUMOR_UP		283	-0.512678	-2.06181	0	6.71e-05	0.026	4179	tags=48%, list=13%, signal=55%
MORF_PPP2CA	MORF_PPP2CA		126	-0.553793	-2.06125	0	6.69e-05	0.026	5505	tags=54%, list=18%, signal=65%
MODULE_28	MODULE_28		32	-0.708274	-2.06095	0	6.68e-05	0.026	6149	tags=75%, list=20%, signal=93%
GSE31082_DN_VS_CD8_SP_THYMOCYTE_UP	GSE31082_DN_VS_CD8_SP_THYMOCYTE_UP		187	-0.536261	-2.06081	0	6.67e-05	0.026	5159	tags=58%, list=16%, signal=69%
VANTVEER_BREAST_CANCER_METASTASIS_DN	VANTVEER_BREAST_CANCER_METASTASIS_DN		111	-0.562214	-2.0602	0	6.89e-05	0.027	4017	tags=48%, list=13%, signal=55%
MITOCHONDRIAL_MATRIX	MITOCHONDRIAL_MATRIX		45	-0.646937	-2.05975	0	6.88e-05	0.027	3678	tags=56%, list=12%, signal=63%
REACTOME_HOST_INTERACTIONS_OF_HIV_FACTORS	REACTOME_HOST_INTERACTIONS_OF_HIV_FACTORS		120	-0.562978	-2.05833	0	7.34e-05	0.029	5581	tags=56%, list=18%, signal=68%
GSE32164_RESTING_DIFFERENTIATED_VS_ALTERNATIVELY_ACT_M2_MACROPHAGE_UP	GSE32164_RESTING_DIFFERENTIATED_VS_ALTERNATIVELY_ACT_M2_MACROPHAGE_UP		175	-0.531597	-2.0583	0	7.32e-05	0.029	3770	tags=45%, list=12%, signal=50%
GSE18791_CTRL_VS_NEWCASTLE_VIRUS_DC_6H_UP	GSE18791_CTRL_VS_NEWCASTLE_VIRUS_DC_6H_UP		183	-0.536345	-2.05769	0	7.31e-05	0.029	3379	tags=44%, list=11%, signal=49%
GSE32986_UNSTIM_VS_GMCSF_AND_CURDLAN_LOWDOSE_STIM_DC_UP	GSE32986_UNSTIM_VS_GMCSF_AND_CURDLAN_LOWDOSE_STIM_DC_UP		192	-0.526366	-2.05658	0	8e-05	0.032	4403	tags=55%, list=14%, signal=63%
WANG_ADIPOGENIC_GENES_REPRESSED_BY_SIRT1	WANG_ADIPOGENIC_GENES_REPRESSED_BY_SIRT1		23	-0.766572	-2.05598	0	7.98e-05	0.032	3538	tags=52%, list=11%, signal=59%
REACTOME_FORMATION_OF_TUBULIN_FOLDING_INTERMEDIATES_BY_CCT_TRIC	REACTOME_FORMATION_OF_TUBULIN_FOLDING_INTERMEDIATES_BY_CCT_TRIC		19	-0.813685	-2.05571	0	7.97e-05	0.032	2408	tags=58%, list=8%, signal=63%
GSE14908_ATOPIC_VS_NONATOPIC_PATIENT_RESTING_CD4_TCELL_DN	GSE14908_ATOPIC_VS_NONATOPIC_PATIENT_RESTING_CD4_TCELL_DN		188	-0.533371	-2.0547	0	7.95e-05	0.032	4745	tags=49%, list=15%, signal=58%
MODULE_432	MODULE_432		14	-0.854468	-2.05449	0	7.94e-05	0.032	2699	tags=86%, list=9%, signal=94%
FINETTI_BREAST_CANCER_KINOME_RED	FINETTI_BREAST_CANCER_KINOME_RED		16	-0.823344	-2.05303	0	7.92e-05	0.032	5033	tags=94%, list=16%, signal=112%
RB_P107_DN.V1_UP	RB_P107_DN.V1_UP		126	-0.557142	-2.0464	0	9.3e-05	0.038	5389	tags=48%, list=17%, signal=58%
REACTOME_VIF_MEDIATED_DEGRADATION_OF_APOBEC3G	REACTOME_VIF_MEDIATED_DEGRADATION_OF_APOBEC3G		48	-0.648888	-2.04622	0	9.52e-05	0.039	5440	tags=65%, list=17%, signal=78%
MORF_GNB1	MORF_GNB1		301	-0.509687	-2.04512	0	9.5e-05	0.039	5723	tags=51%, list=18%, signal=62%
NUCLEAR_PORE	NUCLEAR_PORE		30	-0.706792	-2.04509	0	9.48e-05	0.039	5496	tags=67%, list=17%, signal=81%
REACTOME_SCFSKP2_MEDIATED_DEGRADATION_OF_P27_P21	REACTOME_SCFSKP2_MEDIATED_DEGRADATION_OF_P27_P21		53	-0.638642	-2.043	0	9.7e-05	0.04	4838	tags=58%, list=15%, signal=69%
KEGG_PYRIMIDINE_METABOLISM	KEGG_PYRIMIDINE_METABOLISM		93	-0.58097	-2.04286	0	9.68e-05	0.04	3995	tags=46%, list=13%, signal=53%
WEST_ADRENOCORTICAL_TUMOR_MARKERS_UP	WEST_ADRENOCORTICAL_TUMOR_MARKERS_UP		19	-0.81745	-2.04283	0	9.66e-05	0.04	5299	tags=79%, list=17%, signal=95%
MODULE_8	MODULE_8		398	-0.493744	-2.0422	0	9.87e-05	0.041	4701	tags=47%, list=15%, signal=55%
ZHANG_RESPONSE_TO_CANTHARIDIN_DN	ZHANG_RESPONSE_TO_CANTHARIDIN_DN		67	-0.617999	-2.04136	0	0.000103	0.043	4368	tags=52%, list=14%, signal=61%
GSE21678_WT_VS_FOXO1_FOXO3_KO_TREG_DN	GSE21678_WT_VS_FOXO1_FOXO3_KO_TREG_DN		169	-0.538928	-2.04075	0	0.000103	0.043	3100	tags=38%, list=10%, signal=42%
REACTOME_PROCESSING_OF_CAPPED_INTRONLESS_PRE_MRNA	REACTOME_PROCESSING_OF_CAPPED_INTRONLESS_PRE_MRNA		23	-0.761919	-2.03895	0	0.000103	0.043	6055	tags=83%, list=19%, signal=102%
GSE24634_TEFF_VS_TCONV_DAY7_IN_CULTURE_UP	GSE24634_TEFF_VS_TCONV_DAY7_IN_CULTURE_UP		190	-0.524863	-2.03875	0	0.000105	0.044	3405	tags=52%, list=11%, signal=58%
GSE3982_EOSINOPHIL_VS_TH2_DN	GSE3982_EOSINOPHIL_VS_TH2_DN		186	-0.527556	-2.03865	0	0.000105	0.044	4478	tags=49%, list=14%, signal=57%
MODULE_306	MODULE_306		25	-0.742145	-2.03826	0	0.000104	0.044	3088	tags=52%, list=10%, signal=58%
MITOCHONDRIAL_LUMEN	MITOCHONDRIAL_LUMEN		45	-0.646937	-2.03801	0	0.000104	0.044	3678	tags=56%, list=12%, signal=63%
BIDUS_METASTASIS_UP	BIDUS_METASTASIS_UP		206	-0.522536	-2.03795	0	0.000104	0.044	5793	tags=52%, list=18%, signal=63%
MOOTHA_GLUCONEOGENESIS	MOOTHA_GLUCONEOGENESIS		28	-0.70461	-2.03719	0	0.000104	0.044	2857	tags=50%, list=9%, signal=55%
GSE46468_LUNG_INNATE_LYMPHOID_CELL_VS_SPLEEN_CD4_TCELL_DN	GSE46468_LUNG_INNATE_LYMPHOID_CELL_VS_SPLEEN_CD4_TCELL_DN		191	-0.529731	-2.03607	0	0.000104	0.044	4545	tags=50%, list=14%, signal=58%
GSE15330_MEGAKARYOCYTE_ERYTHROID_VS_GRANULOCYTE_MONOCYTE_PROGENITOR_IKAROS_KO_UP	GSE15330_MEGAKARYOCYTE_ERYTHROID_VS_GRANULOCYTE_MONOCYTE_PROGENITOR_IKAROS_KO_UP		189	-0.527849	-2.03606	0	0.000103	0.044	4969	tags=53%, list=16%, signal=62%
MOREAUX_B_LYMPHOCYTE_MATURATION_BY_TACI_DN	MOREAUX_B_LYMPHOCYTE_MATURATION_BY_TACI_DN		70	-0.600641	-2.03599	0	0.000103	0.044	4567	tags=51%, list=15%, signal=60%
GSE14415_ACT_VS_CTRL_NATURAL_TREG_UP	GSE14415_ACT_VS_CTRL_NATURAL_TREG_UP		164	-0.538423	-2.03528	0	0.000103	0.044	4985	tags=55%, list=16%, signal=65%
PID_PLK1_PATHWAY	PID_PLK1_PATHWAY		45	-0.651769	-2.03397	0	0.00011	0.047	3422	tags=49%, list=11%, signal=55%
KEGG_STEROID_BIOSYNTHESIS	KEGG_STEROID_BIOSYNTHESIS		16	-0.838154	-2.03376	0	0.000109	0.047	1991	tags=56%, list=6%, signal=60%
GSE45365_HEALTHY_VS_MCMV_INFECTION_CD11B_DC_DN	GSE45365_HEALTHY_VS_MCMV_INFECTION_CD11B_DC_DN		157	-0.534404	-2.03189	0	0.000111	0.048	3405	tags=39%, list=11%, signal=43%
GSE15330_GRANULOCYTE_MONOCYTE_PROGENITOR_VS_PRO_BCELL_UP	GSE15330_GRANULOCYTE_MONOCYTE_PROGENITOR_VS_PRO_BCELL_UP		184	-0.524339	-2.03174	0	0.000111	0.048	5520	tags=49%, list=18%, signal=60%
JEON_SMAD6_TARGETS_DN	JEON_SMAD6_TARGETS_DN		17	-0.793283	-2.03077	0	0.000113	0.049	3942	tags=65%, list=13%, signal=74%
GSE45365_NK_CELL_VS_CD11B_DC_MCMV_INFECTION_UP	GSE45365_NK_CELL_VS_CD11B_DC_MCMV_INFECTION_UP		170	-0.53318	-2.02773	0	0.000124	0.054	3538	tags=41%, list=11%, signal=45%
REACTOME_PREFOLDIN_MEDIATED_TRANSFER_OF_SUBSTRATE_TO_CCT_TRIC	REACTOME_PREFOLDIN_MEDIATED_TRANSFER_OF_SUBSTRATE_TO_CCT_TRIC		25	-0.767115	-2.02508	0	0.000135	0.059	4375	tags=64%, list=14%, signal=74%
LIGASE_ACTIVITY_FORMING_CARBON_OXYGEN_BONDS	LIGASE_ACTIVITY_FORMING_CARBON_OXYGEN_BONDS		14	-0.837053	-2.02456	0	0.000137	0.06	3376	tags=86%, list=11%, signal=96%
GSE42724_NAIVE_VS_B1_BCELL_DN	GSE42724_NAIVE_VS_B1_BCELL_DN		187	-0.527705	-2.02362	0	0.000139	0.061	4227	tags=44%, list=13%, signal=50%
GSE27786_LIN_NEG_VS_MONO_MAC_UP	GSE27786_LIN_NEG_VS_MONO_MAC_UP		188	-0.525812	-2.02337	0	0.000138	0.061	4253	tags=44%, list=14%, signal=50%
WHITFIELD_CELL_CYCLE_LITERATURE	WHITFIELD_CELL_CYCLE_LITERATURE		44	-0.658721	-2.02232	0	0.00014	0.062	4872	tags=82%, list=15%, signal=97%
MODULE_133	MODULE_133		15	-0.817919	-2.01838	0	0.000144	0.064	2184	tags=73%, list=7%, signal=79%
HUMMERICH_BENIGN_SKIN_TUMOR_UP	HUMMERICH_BENIGN_SKIN_TUMOR_UP		15	-0.827803	-2.01751	0	0.000146	0.065	3966	tags=60%, list=13%, signal=69%
GSE13547_2H_VS_12_H_ANTI_IGM_STIM_ZFX_KO_BCELL_DN	GSE13547_2H_VS_12_H_ANTI_IGM_STIM_ZFX_KO_BCELL_DN		167	-0.525117	-2.01741	0	0.000146	0.065	4341	tags=51%, list=14%, signal=59%
MORF_RPA2	MORF_RPA2		186	-0.522091	-2.0168	0	0.000152	0.068	5505	tags=48%, list=18%, signal=58%
GSE3982_EFF_MEMORY_CD4_TCELL_VS_TH1_DN	GSE3982_EFF_MEMORY_CD4_TCELL_VS_TH1_DN		186	-0.521132	-2.01649	0	0.000152	0.068	4487	tags=47%, list=14%, signal=55%
MTOR_UP.N4.V1_UP	MTOR_UP.N4.V1_UP		188	-0.522093	-2.01609	0	0.000154	0.069	3072	tags=41%, list=10%, signal=46%
GSE21063_CTRL_VS_ANTI_IGM_STIM_BCELL_NFATC1_KO_8H_DN	GSE21063_CTRL_VS_ANTI_IGM_STIM_BCELL_NFATC1_KO_8H_DN		187	-0.523732	-2.01605	0	0.000154	0.069	4287	tags=51%, list=14%, signal=59%
GAVIN_FOXP3_TARGETS_CLUSTER_P6	GAVIN_FOXP3_TARGETS_CLUSTER_P6		84	-0.570882	-2.01495	0	0.000153	0.069	4113	tags=63%, list=13%, signal=72%
PID_BARD1_PATHWAY	PID_BARD1_PATHWAY		29	-0.718841	-2.01414	0	0.000157	0.071	5471	tags=72%, list=17%, signal=88%
ELVIDGE_HIF1A_AND_HIF2A_TARGETS_UP	ELVIDGE_HIF1A_AND_HIF2A_TARGETS_UP		38	-0.663908	-2.0129	0	0.000159	0.072	4228	tags=58%, list=13%, signal=67%
REACTOME_CYCLIN_E_ASSOCIATED_EVENTS_DURING_G1_S_TRANSITION_	REACTOME_CYCLIN_E_ASSOCIATED_EVENTS_DURING_G1_S_TRANSITION_		62	-0.607529	-2.01169	0	0.000161	0.073	4838	tags=55%, list=15%, signal=65%
GSE2770_IL12_AND_TGFB_ACT_VS_ACT_CD4_TCELL_48H_DN	GSE2770_IL12_AND_TGFB_ACT_VS_ACT_CD4_TCELL_48H_DN		190	-0.523714	-2.01168	0	0.000161	0.073	5015	tags=47%, list=16%, signal=55%
KEGG_CITRATE_CYCLE_TCA_CYCLE	KEGG_CITRATE_CYCLE_TCA_CYCLE		29	-0.702804	-2.01123	0	0.00016	0.073	3526	tags=55%, list=11%, signal=62%
GSE25088_WT_VS_STAT6_KO_MACROPHAGE_DN	GSE25088_WT_VS_STAT6_KO_MACROPHAGE_DN		183	-0.522312	-2.01114	0	0.00016	0.073	3492	tags=43%, list=11%, signal=48%
BUYTAERT_PHOTODYNAMIC_THERAPY_STRESS_DN	BUYTAERT_PHOTODYNAMIC_THERAPY_STRESS_DN		585	-0.465135	-2.01019	0	0.000162	0.074	4082	tags=39%, list=13%, signal=45%
MRNA_PROCESSING_GO_0006397	MRNA_PROCESSING_GO_0006397		73	-0.596466	-2.00806	0	0.000168	0.077	5787	tags=58%, list=18%, signal=70%
MITOCHONDRIAL_ENVELOPE	MITOCHONDRIAL_ENVELOPE		91	-0.560176	-2.00793	0	0.000168	0.077	5811	tags=55%, list=18%, signal=67%
V$E2F1_Q6_01	V$E2F1_Q6_01		228	-0.503585	-2.00731	0	0.000176	0.08	4225	tags=39%, list=13%, signal=45%
GSE2770_UNTREATED_VS_IL4_TREATED_ACT_CD4_TCELL_2H_DN	GSE2770_UNTREATED_VS_IL4_TREATED_ACT_CD4_TCELL_2H_DN		189	-0.508709	-2.00643	0	0.000178	0.081	4016	tags=44%, list=13%, signal=51%
GSE37532_TREG_VS_TCONV_PPARG_KO_CD4_TCELL_FROM_VISCERAL_ADIPOSE_TISSUE_UP	GSE37532_TREG_VS_TCONV_PPARG_KO_CD4_TCELL_FROM_VISCERAL_ADIPOSE_TISSUE_UP		182	-0.528586	-2.0052	0	0.000179	0.082	4067	tags=47%, list=13%, signal=54%
MORI_EMU_MYC_LYMPHOMA_BY_ONSET_TIME_UP	MORI_EMU_MYC_LYMPHOMA_BY_ONSET_TIME_UP		104	-0.559782	-2.00471	0	0.000181	0.083	4552	tags=54%, list=14%, signal=63%
LE_EGR2_TARGETS_UP	LE_EGR2_TARGETS_UP		104	-0.554662	-2.00309	0	0.000183	0.084	3428	tags=49%, list=11%, signal=55%
MODULE_286	MODULE_286		34	-0.685577	-2.00305	0	0.000183	0.084	4684	tags=56%, list=15%, signal=66%
PROTEIN_FOLDING	PROTEIN_FOLDING		57	-0.610118	-2.00196	0	0.000187	0.086	3983	tags=54%, list=13%, signal=62%
PORE_COMPLEX	PORE_COMPLEX		35	-0.683713	-2.00178	0	0.000186	0.086	5496	tags=63%, list=17%, signal=76%
BIOCARTA_PROTEASOME_PATHWAY	BIOCARTA_PROTEASOME_PATHWAY		28	-0.706952	-2.00174	0	0.000186	0.086	5402	tags=68%, list=17%, signal=82%
GSE6674_ANTI_IGM_VS_CPG_STIM_BCELL_DN	GSE6674_ANTI_IGM_VS_CPG_STIM_BCELL_DN		186	-0.513787	-2.00036	0	0.00019	0.087	3715	tags=52%, list=12%, signal=59%
GSE30971_2H_VS_4H_LPS_STIM_MACROPHAGE_WBP7_HET_UP	GSE30971_2H_VS_4H_LPS_STIM_MACROPHAGE_WBP7_HET_UP		163	-0.525496	-1.99909	0	0.000198	0.091	5274	tags=50%, list=17%, signal=60%
GSE23568_ID3_KO_VS_WT_CD8_TCELL_UP	GSE23568_ID3_KO_VS_WT_CD8_TCELL_UP		194	-0.513973	-1.99898	0	0.000197	0.091	4942	tags=56%, list=16%, signal=66%
ORGANELLE_ENVELOPE	ORGANELLE_ENVELOPE		160	-0.526476	-1.99786	0	0.000208	0.095	5840	tags=53%, list=19%, signal=65%
GSE18791_CTRL_VS_NEWCASTLE_VIRUS_DC_16H_UP	GSE18791_CTRL_VS_NEWCASTLE_VIRUS_DC_16H_UP		191	-0.521682	-1.99774	0	0.000207	0.095	4957	tags=48%, list=16%, signal=57%
BOYAULT_LIVER_CANCER_SUBCLASS_G123_UP	BOYAULT_LIVER_CANCER_SUBCLASS_G123_UP		43	-0.644594	-1.99757	0	0.000207	0.095	5113	tags=60%, list=16%, signal=72%
GSE40274_CTRL_VS_HELIOS_TRANSDUCED_ACTIVATED_CD4_TCELL_DN	GSE40274_CTRL_VS_HELIOS_TRANSDUCED_ACTIVATED_CD4_TCELL_DN		158	-0.518301	-1.997	0	0.000206	0.095	4907	tags=47%, list=16%, signal=56%
GSE14908_ATOPIC_VS_NONATOPIC_PATIENT_HDM_STIM_CD4_TCELL_DN	GSE14908_ATOPIC_VS_NONATOPIC_PATIENT_HDM_STIM_CD4_TCELL_DN		185	-0.516915	-1.9969	0	0.000206	0.095	4810	tags=47%, list=15%, signal=55%
REACTOME_P53_DEPENDENT_G1_DNA_DAMAGE_RESPONSE	REACTOME_P53_DEPENDENT_G1_DNA_DAMAGE_RESPONSE		52	-0.618755	-1.99682	0	0.000206	0.095	4838	tags=56%, list=15%, signal=66%
GREENBAUM_E2A_TARGETS_UP	GREENBAUM_E2A_TARGETS_UP		33	-0.678825	-1.99629	0.00288184	0.000205	0.095	3428	tags=67%, list=11%, signal=75%
GSE30971_WBP7_HET_VS_KO_MACROPHAGE_4H_LPS_STIM_UP	GSE30971_WBP7_HET_VS_KO_MACROPHAGE_4H_LPS_STIM_UP		178	-0.523427	-1.99602	0	0.000209	0.097	3373	tags=39%, list=11%, signal=44%
GSE12845_IGD_POS_BLOOD_VS_PRE_GC_TONSIL_BCELL_DN	GSE12845_IGD_POS_BLOOD_VS_PRE_GC_TONSIL_BCELL_DN		196	-0.513673	-1.99397	0	0.000213	0.099	4035	tags=49%, list=13%, signal=56%
GSE37532_TREG_VS_TCONV_PPARG_KO_CD4_TCELL_FROM_LN_DN	GSE37532_TREG_VS_TCONV_PPARG_KO_CD4_TCELL_FROM_LN_DN		192	-0.506407	-1.99316	0	0.000217	0.101	2814	tags=46%, list=9%, signal=51%
KEGG_MISMATCH_REPAIR	KEGG_MISMATCH_REPAIR		23	-0.744808	-1.99199	0	0.000231	0.108	6053	tags=91%, list=19%, signal=113%
GSE9878_CTRL_VS_EBF_TRANSDUCED_PAX5_KO_PRO_BCELL_DN	GSE9878_CTRL_VS_EBF_TRANSDUCED_PAX5_KO_PRO_BCELL_DN		191	-0.519744	-1.9918	0	0.000232	0.109	4727	tags=48%, list=15%, signal=56%
GSE41087_WT_VS_FOXP3_MUT_ANTI_CD3_CD28_STIM_CD4_TCELL_DN	GSE41087_WT_VS_FOXP3_MUT_ANTI_CD3_CD28_STIM_CD4_TCELL_DN		193	-0.511068	-1.99137	0	0.000232	0.109	5275	tags=52%, list=17%, signal=62%
MORI_PRE_BI_LYMPHOCYTE_UP	MORI_PRE_BI_LYMPHOCYTE_UP		75	-0.579429	-1.99112	0	0.000231	0.109	3680	tags=56%, list=12%, signal=63%
GSE24026_PD1_LIGATION_VS_CTRL_IN_ACT_TCELL_LINE_DN	GSE24026_PD1_LIGATION_VS_CTRL_IN_ACT_TCELL_LINE_DN		188	-0.514152	-1.99079	0	0.000235	0.111	4970	tags=49%, list=16%, signal=58%
MOOTHA_VOXPHOS	MOOTHA_VOXPHOS		83	-0.578418	-1.98998	0	0.000237	0.112	5923	tags=52%, list=19%, signal=64%
GSE15930_NAIVE_VS_72H_IN_VITRO_STIM_IFNAB_CD8_TCELL_DN	GSE15930_NAIVE_VS_72H_IN_VITRO_STIM_IFNAB_CD8_TCELL_DN		191	-0.507832	-1.98889	0	0.00024	0.114	5072	tags=53%, list=16%, signal=63%
ELVIDGE_HYPOXIA_BY_DMOG_DN	ELVIDGE_HYPOXIA_BY_DMOG_DN		54	-0.618062	-1.98798	0	0.000244	0.116	5073	tags=57%, list=16%, signal=68%
MORF_SKP1A	MORF_SKP1A		200	-0.513791	-1.98722	0	0.000246	0.117	5723	tags=51%, list=18%, signal=61%
REACTOME_UNWINDING_OF_DNA	REACTOME_UNWINDING_OF_DNA		11	-0.889731	-1.9863	0	0.000253	0.121	2401	tags=91%, list=8%, signal=98%
GSE2770_UNTREATED_VS_IL4_TREATED_ACT_CD4_TCELL_48H_DN	GSE2770_UNTREATED_VS_IL4_TREATED_ACT_CD4_TCELL_48H_DN		194	-0.512825	-1.98594	0	0.000255	0.122	4368	tags=50%, list=14%, signal=58%
GSE41867_DAY8_EFFECTOR_VS_DAY30_MEMORY_CD8_TCELL_LCMV_ARMSTRONG_UP	GSE41867_DAY8_EFFECTOR_VS_DAY30_MEMORY_CD8_TCELL_LCMV_ARMSTRONG_UP		191	-0.506432	-1.98351	0	0.000274	0.132	4747	tags=51%, list=15%, signal=59%
WENG_POR_TARGETS_GLOBAL_UP	WENG_POR_TARGETS_GLOBAL_UP		16	-0.797264	-1.98265	0	0.000284	0.136	464	tags=38%, list=1%, signal=38%
GSE41867_LCMV_ARMSTRONG_VS_CLONE13_DAY6_EFFECTOR_CD8_TCELL_DN	GSE41867_LCMV_ARMSTRONG_VS_CLONE13_DAY6_EFFECTOR_CD8_TCELL_DN		188	-0.514272	-1.98041	0	0.000297	0.142	5695	tags=58%, list=18%, signal=70%
MODULE_16	MODULE_16		473	-0.467506	-1.97929	0	0.000309	0.148	4712	tags=45%, list=15%, signal=52%
REACTOME_RESPIRATORY_ELECTRON_TRANSPORT	REACTOME_RESPIRATORY_ELECTRON_TRANSPORT		65	-0.597854	-1.978	0	0.000318	0.153	7129	tags=60%, list=23%, signal=77%
ENVELOPE	ENVELOPE		160	-0.526476	-1.9777	0	0.000322	0.154	5840	tags=53%, list=19%, signal=65%
MONNIER_POSTRADIATION_TUMOR_ESCAPE_UP	MONNIER_POSTRADIATION_TUMOR_ESCAPE_UP		376	-0.485268	-1.97619	0	0.000331	0.159	4486	tags=41%, list=14%, signal=48%
STARK_PREFRONTAL_CORTEX_22Q11_DELETION_DN	STARK_PREFRONTAL_CORTEX_22Q11_DELETION_DN		476	-0.470222	-1.9729	0	0.000358	0.172	5695	tags=48%, list=18%, signal=57%
GSE33162_UNTREATED_VS_4H_LPS_STIM_HDAC3_KO_MACROPHAGE_DN	GSE33162_UNTREATED_VS_4H_LPS_STIM_HDAC3_KO_MACROPHAGE_DN		191	-0.504165	-1.97167	0	0.000364	0.175	5402	tags=51%, list=17%, signal=62%
HONMA_DOCETAXEL_RESISTANCE	HONMA_DOCETAXEL_RESISTANCE		34	-0.65916	-1.97137	0	0.000371	0.177	5592	tags=59%, list=18%, signal=71%
STK33_NOMO_DN	STK33_NOMO_DN		251	-0.497168	-1.97057	0	0.000378	0.181	4175	tags=38%, list=13%, signal=43%
MODULE_219	MODULE_219		25	-0.71236	-1.96991	0	0.000386	0.185	3280	tags=80%, list=10%, signal=89%
REACTOME_AUTODEGRADATION_OF_CDH1_BY_CDH1_APC_C	REACTOME_AUTODEGRADATION_OF_CDH1_BY_CDH1_APC_C		56	-0.611961	-1.9697	0	0.000387	0.186	4937	tags=54%, list=16%, signal=63%
GSE41176_WT_VS_TAK1_KO_ANTI_IGM_STIM_BCELL_3H_DN	GSE41176_WT_VS_TAK1_KO_ANTI_IGM_STIM_BCELL_3H_DN		192	-0.503208	-1.96761	0	0.000412	0.198	3120	tags=42%, list=10%, signal=46%
GSE18791_CTRL_VS_NEWCASTLE_VIRUS_DC_10H_UP	GSE18791_CTRL_VS_NEWCASTLE_VIRUS_DC_10H_UP		182	-0.501336	-1.96755	0	0.000411	0.198	4333	tags=42%, list=14%, signal=49%
GSE41867_LCMV_ARMSTRONG_VS_CLONE13_DAY6_EFFECTOR_CD8_TCELL_UP	GSE41867_LCMV_ARMSTRONG_VS_CLONE13_DAY6_EFFECTOR_CD8_TCELL_UP		191	-0.509192	-1.96662	0	0.00042	0.202	4842	tags=51%, list=15%, signal=60%
GSE17974_0H_VS_48H_IN_VITRO_ACT_CD4_TCELL_DN	GSE17974_0H_VS_48H_IN_VITRO_ACT_CD4_TCELL_DN		183	-0.514539	-1.96609	0	0.000425	0.205	5505	tags=52%, list=18%, signal=63%
GSE17974_0.5H_VS_72H_UNTREATED_IN_VITRO_CD4_TCELL_DN	GSE17974_0.5H_VS_72H_UNTREATED_IN_VITRO_CD4_TCELL_DN		186	-0.509107	-1.96605	0	0.000425	0.205	5003	tags=51%, list=16%, signal=60%
GAJATE_RESPONSE_TO_TRABECTEDIN_DN	GAJATE_RESPONSE_TO_TRABECTEDIN_DN		18	-0.778293	-1.96454	0	0.000439	0.21	2473	tags=67%, list=8%, signal=72%
MITOCHONDRIAL_INNER_MEMBRANE	MITOCHONDRIAL_INNER_MEMBRANE		63	-0.584998	-1.96339	0	0.000448	0.214	5284	tags=52%, list=17%, signal=63%
GSE23321_CD8_STEM_CELL_MEMORY_VS_NAIVE_CD8_TCELL_UP	GSE23321_CD8_STEM_CELL_MEMORY_VS_NAIVE_CD8_TCELL_UP		175	-0.509148	-1.96305	0	0.000448	0.214	4636	tags=48%, list=15%, signal=56%
GCM_CBFB	GCM_CBFB		70	-0.574363	-1.9629	0	0.000449	0.214	5340	tags=56%, list=17%, signal=67%
GSE1460_INTRATHYMIC_T_PROGENITOR_VS_NAIVE_CD4_TCELL_CORD_BLOOD_UP	GSE1460_INTRATHYMIC_T_PROGENITOR_VS_NAIVE_CD4_TCELL_CORD_BLOOD_UP		190	-0.51111	-1.9621	0	0.00045	0.215	4710	tags=47%, list=15%, signal=55%
REACTOME_LAGGING_STRAND_SYNTHESIS	REACTOME_LAGGING_STRAND_SYNTHESIS		19	-0.765358	-1.962	0	0.000449	0.215	5274	tags=89%, list=17%, signal=107%
MODULE_155	MODULE_155		24	-0.721647	-1.96157	0	0.000453	0.217	2742	tags=58%, list=9%, signal=64%
JAEGER_METASTASIS_UP	JAEGER_METASTASIS_UP		36	-0.664558	-1.96103	0	0.000458	0.22	5580	tags=56%, list=18%, signal=67%
GSE21063_CTRL_VS_ANTI_IGM_STIM_BCELL_16H_UP	GSE21063_CTRL_VS_ANTI_IGM_STIM_BCELL_16H_UP		181	-0.511495	-1.95677	0	0.000487	0.233	6101	tags=50%, list=19%, signal=62%
BOYAULT_LIVER_CANCER_SUBCLASS_G23_UP	BOYAULT_LIVER_CANCER_SUBCLASS_G23_UP		49	-0.615748	-1.95614	0	0.000487	0.233	4567	tags=57%, list=15%, signal=67%
LEE_LIVER_CANCER_SURVIVAL_DN	LEE_LIVER_CANCER_SURVIVAL_DN		167	-0.506212	-1.95468	0	0.000495	0.236	4627	tags=43%, list=15%, signal=50%
GSE20727_CTRL_VS_ROS_INH_AND_DNFB_ALLERGEN_TREATED_DC_DN	GSE20727_CTRL_VS_ROS_INH_AND_DNFB_ALLERGEN_TREATED_DC_DN		184	-0.506679	-1.95413	0	0.000499	0.238	3359	tags=41%, list=11%, signal=46%
NAKAYAMA_SOFT_TISSUE_TUMORS_PCA2_UP	NAKAYAMA_SOFT_TISSUE_TUMORS_PCA2_UP		79	-0.573302	-1.95317	0	0.000507	0.243	4141	tags=49%, list=13%, signal=57%
ORGANELLAR_RIBOSOME	ORGANELLAR_RIBOSOME		22	-0.727858	-1.95182	0	0.000522	0.246	3678	tags=73%, list=12%, signal=82%
GSE27786_LIN_NEG_VS_CD4_TCELL_UP	GSE27786_LIN_NEG_VS_CD4_TCELL_UP		185	-0.499232	-1.95135	0	0.000523	0.247	4896	tags=47%, list=16%, signal=55%
GSE25088_WT_VS_STAT6_KO_MACROPHAGE_ROSIGLITAZONE_AND_IL4_STIM_UP	GSE25088_WT_VS_STAT6_KO_MACROPHAGE_ROSIGLITAZONE_AND_IL4_STIM_UP		184	-0.499379	-1.95108	0	0.000522	0.247	4341	tags=39%, list=14%, signal=45%
MITOCHONDRIAL_MEMBRANE_PART	MITOCHONDRIAL_MEMBRANE_PART		52	-0.602442	-1.95076	0	0.000521	0.247	5811	tags=58%, list=18%, signal=71%
PARK_APL_PATHOGENESIS_DN	PARK_APL_PATHOGENESIS_DN		47	-0.62888	-1.95065	0	0.00052	0.247	1943	tags=36%, list=6%, signal=38%
GSE2770_UNTREATED_VS_ACT_CD4_TCELL_2H_DN	GSE2770_UNTREATED_VS_ACT_CD4_TCELL_2H_DN		180	-0.49382	-1.95002	0	0.000525	0.248	5695	tags=50%, list=18%, signal=61%
DNA_REPLICATION	DNA_REPLICATION		100	-0.545385	-1.94787	0	0.000551	0.258	6376	tags=61%, list=20%, signal=76%
GSE43863_TH1_VS_LY6C_INT_CXCR5POS_MEMORY_CD4_TCELL_UP	GSE43863_TH1_VS_LY6C_INT_CXCR5POS_MEMORY_CD4_TCELL_UP		189	-0.509378	-1.94586	0	0.000576	0.269	3214	tags=48%, list=10%, signal=53%
KEGG_TERPENOID_BACKBONE_BIOSYNTHESIS	KEGG_TERPENOID_BACKBONE_BIOSYNTHESIS		14	-0.81418	-1.94498	0	0.000589	0.274	2372	tags=64%, list=8%, signal=69%
PEART_HDAC_PROLIFERATION_CLUSTER_DN	PEART_HDAC_PROLIFERATION_CLUSTER_DN		74	-0.568216	-1.94493	0	0.00059	0.274	5472	tags=65%, list=17%, signal=78%
RIBONUCLEASE_ACTIVITY	RIBONUCLEASE_ACTIVITY		23	-0.71834	-1.94417	0	0.000596	0.277	4093	tags=78%, list=13%, signal=90%
SCHMIDT_POR_TARGETS_IN_LIMB_BUD_UP	SCHMIDT_POR_TARGETS_IN_LIMB_BUD_UP		25	-0.696661	-1.94402	0.00273973	0.000597	0.278	879	tags=48%, list=3%, signal=49%
GSE21546_WT_VS_SAP1A_KO_ANTI_CD3_STIM_DP_THYMOCYTES_UP	GSE21546_WT_VS_SAP1A_KO_ANTI_CD3_STIM_DP_THYMOCYTES_UP		178	-0.498795	-1.94293	0	0.000613	0.283	4123	tags=38%, list=13%, signal=44%
BILD_MYC_ONCOGENIC_SIGNATURE	BILD_MYC_ONCOGENIC_SIGNATURE		189	-0.503713	-1.94206	0	0.000618	0.286	2164	tags=40%, list=7%, signal=43%
GSE14000_TRANSLATED_RNA_VS_MRNA_DC_UP	GSE14000_TRANSLATED_RNA_VS_MRNA_DC_UP		191	-0.502404	-1.94195	0	0.000617	0.286	4481	tags=45%, list=14%, signal=52%
GSE7460_CTRL_VS_TGFB_TREATED_ACT_TREG_UP	GSE7460_CTRL_VS_TGFB_TREATED_ACT_TREG_UP		185	-0.501446	-1.94165	0	0.000619	0.286	4089	tags=47%, list=13%, signal=54%
MATTIOLI_MGUS_VS_PCL	MATTIOLI_MGUS_VS_PCL		97	-0.540101	-1.94127	0	0.000628	0.288	4171	tags=47%, list=13%, signal=55%
MITOCHONDRIAL_RIBOSOME	MITOCHONDRIAL_RIBOSOME		22	-0.727858	-1.94097	0	0.000628	0.289	3678	tags=73%, list=12%, signal=82%
REACTOME_PYRUVATE_METABOLISM_AND_CITRIC_ACID_TCA_CYCLE	REACTOME_PYRUVATE_METABOLISM_AND_CITRIC_ACID_TCA_CYCLE		39	-0.643289	-1.94066	0	0.000629	0.29	3229	tags=46%, list=10%, signal=51%
SIMBULAN_PARP1_TARGETS_DN	SIMBULAN_PARP1_TARGETS_DN		16	-0.783279	-1.93876	0	0.000656	0.299	1948	tags=63%, list=6%, signal=67%
GSE32986_CURDLAN_LOWDOSE_VS_GMCSF_AND_CURDLAN_LOWDOSE_STIM_DC_DN	GSE32986_CURDLAN_LOWDOSE_VS_GMCSF_AND_CURDLAN_LOWDOSE_STIM_DC_DN		191	-0.501764	-1.9384	0	0.000659	0.301	4447	tags=48%, list=14%, signal=55%
REACTOME_SLBP_DEPENDENT_PROCESSING_OF_REPLICATION_DEPENDENT_HISTONE_PRE_MRNAS	REACTOME_SLBP_DEPENDENT_PROCESSING_OF_REPLICATION_DEPENDENT_HISTONE_PRE_MRNAS		11	-0.850486	-1.93681	0	0.000685	0.309	3373	tags=91%, list=11%, signal=102%
GSE2770_TGFB_AND_IL4_VS_IL12_TREATED_ACT_CD4_TCELL_6H_DN	GSE2770_TGFB_AND_IL4_VS_IL12_TREATED_ACT_CD4_TCELL_6H_DN		189	-0.493917	-1.93668	0	0.000686	0.309	5669	tags=51%, list=18%, signal=62%
MODULE_42	MODULE_42		25	-0.695683	-1.93639	0	0.000689	0.31	4034	tags=60%, list=13%, signal=69%
GSE32986_UNSTIM_VS_CURDLAN_HIGHDOSE_STIM_DC_UP	GSE32986_UNSTIM_VS_CURDLAN_HIGHDOSE_STIM_DC_UP		190	-0.501788	-1.93594	0	0.000693	0.312	5366	tags=55%, list=17%, signal=66%
NADERI_BREAST_CANCER_PROGNOSIS_UP	NADERI_BREAST_CANCER_PROGNOSIS_UP		41	-0.628465	-1.93592	0	0.000692	0.312	4339	tags=59%, list=14%, signal=68%
GSE17721_POLYIC_VS_CPG_12H_BMDM_DN	GSE17721_POLYIC_VS_CPG_12H_BMDM_DN		184	-0.496981	-1.93569	0	0.000693	0.313	4041	tags=40%, list=13%, signal=46%
BORCZUK_MALIGNANT_MESOTHELIOMA_UP	BORCZUK_MALIGNANT_MESOTHELIOMA_UP		296	-0.477079	-1.93341	0	0.000721	0.323	5000	tags=45%, list=16%, signal=53%
REACTOME_MRNA_3_END_PROCESSING	REACTOME_MRNA_3_END_PROCESSING		33	-0.660892	-1.93179	0	0.000742	0.33	6055	tags=61%, list=19%, signal=75%
REACTOME_SIGNALING_BY_WNT	REACTOME_SIGNALING_BY_WNT		61	-0.580326	-1.93177	0	0.000741	0.33	5315	tags=54%, list=17%, signal=65%
GSE29614_CTRL_VS_DAY7_TIV_FLU_VACCINE_PBMC_DN	GSE29614_CTRL_VS_DAY7_TIV_FLU_VACCINE_PBMC_DN		171	-0.503194	-1.93124	0	0.000742	0.331	4820	tags=51%, list=15%, signal=60%
GSE22589_HEALTHY_VS_HIV_INFECTED_DC_UP	GSE22589_HEALTHY_VS_HIV_INFECTED_DC_UP		185	-0.498353	-1.93075	0	0.000746	0.332	3780	tags=41%, list=12%, signal=46%
RAHMAN_TP53_TARGETS_PHOSPHORYLATED	RAHMAN_TP53_TARGETS_PHOSPHORYLATED		21	-0.740631	-1.93018	0	0.000756	0.337	5253	tags=71%, list=17%, signal=86%
ZAMORA_NOS2_TARGETS_UP	ZAMORA_NOS2_TARGETS_UP		66	-0.579378	-1.93	0	0.000754	0.337	5004	tags=50%, list=16%, signal=59%
REACTOME_HIV_INFECTION	REACTOME_HIV_INFECTION		189	-0.505187	-1.92944	0	0.000766	0.34	5581	tags=49%, list=18%, signal=59%
GAL_LEUKEMIC_STEM_CELL_DN	GAL_LEUKEMIC_STEM_CELL_DN		220	-0.495451	-1.92914	0	0.000768	0.342	4058	tags=42%, list=13%, signal=48%
REACTOME_MITOCHONDRIAL_TRNA_AMINOACYLATION	REACTOME_MITOCHONDRIAL_TRNA_AMINOACYLATION		21	-0.735028	-1.92889	0	0.000773	0.343	4720	tags=71%, list=15%, signal=84%
LY_AGING_MIDDLE_DN	LY_AGING_MIDDLE_DN		16	-0.782707	-1.92864	0	0.000775	0.344	3942	tags=88%, list=13%, signal=100%
MULLIGAN_NTF3_SIGNALING_VIA_INSR_AND_IGF1R_UP	MULLIGAN_NTF3_SIGNALING_VIA_INSR_AND_IGF1R_UP		21	-0.720466	-1.92834	0	0.000779	0.346	1945	tags=62%, list=6%, signal=66%
GSE3982_NEUTROPHIL_VS_TH1_DN	GSE3982_NEUTROPHIL_VS_TH1_DN		191	-0.501293	-1.92798	0	0.000782	0.347	5013	tags=49%, list=16%, signal=58%
MODULE_457	MODULE_457		10	-0.873853	-1.92612	0	0.000793	0.351	3359	tags=80%, list=11%, signal=90%
GSE22589_HEALTHY_VS_HIV_AND_SIV_INFECTED_DC_UP	GSE22589_HEALTHY_VS_HIV_AND_SIV_INFECTED_DC_UP		189	-0.498786	-1.92531	0	0.000801	0.355	5383	tags=50%, list=17%, signal=60%
ENDORIBONUCLEASE_ACTIVITY	ENDORIBONUCLEASE_ACTIVITY		12	-0.838881	-1.92499	0	0.000809	0.358	4704	tags=92%, list=15%, signal=108%
CUI_TCF21_TARGETS_2_UP	CUI_TCF21_TARGETS_2_UP		388	-0.459662	-1.92341	0	0.000827	0.366	3711	tags=36%, list=12%, signal=40%
GSE28408_LY6G_POS_VS_NEG_DC_DN	GSE28408_LY6G_POS_VS_NEG_DC_DN		185	-0.504869	-1.9231	0	0.000829	0.368	3870	tags=49%, list=12%, signal=56%
GSE43863_TH1_VS_LY6C_INT_CXCR5POS_EFFECTOR_CD4_TCELL_UP	GSE43863_TH1_VS_LY6C_INT_CXCR5POS_EFFECTOR_CD4_TCELL_UP		184	-0.497422	-1.92294	0	0.00083	0.369	5804	tags=57%, list=18%, signal=70%
GSE17301_ACD3_ACD28_VS_ACD3_ACD28_AND_IFNA5_STIM_CD8_TCELL_UP	GSE17301_ACD3_ACD28_VS_ACD3_ACD28_AND_IFNA5_STIM_CD8_TCELL_UP		181	-0.501373	-1.92093	0	0.00085	0.377	4266	tags=41%, list=14%, signal=48%
GSE45365_WT_VS_IFNAR_KO_CD11B_DC_MCMV_INFECTION_DN	GSE45365_WT_VS_IFNAR_KO_CD11B_DC_MCMV_INFECTION_DN		142	-0.507915	-1.92068	0	0.000848	0.377	3405	tags=36%, list=11%, signal=40%
REACTOME_G0_AND_EARLY_G1	REACTOME_G0_AND_EARLY_G1		24	-0.68932	-1.92018	0	0.000854	0.38	4147	tags=54%, list=13%, signal=62%
GOLDRATH_EFF_VS_MEMORY_CD8_TCELL_UP	GOLDRATH_EFF_VS_MEMORY_CD8_TCELL_UP		189	-0.492328	-1.92015	0	0.000853	0.38	3428	tags=48%, list=11%, signal=53%
MORI_MATURE_B_LYMPHOCYTE_DN	MORI_MATURE_B_LYMPHOCYTE_DN		71	-0.555263	-1.91765	0	0.000901	0.397	3360	tags=52%, list=11%, signal=58%
LI_WILMS_TUMOR_ANAPLASTIC_UP	LI_WILMS_TUMOR_ANAPLASTIC_UP		19	-0.741826	-1.91614	0.00245098	0.000923	0.404	2902	tags=74%, list=9%, signal=81%
MODULE_320	MODULE_320		20	-0.722574	-1.91591	0	0.000921	0.404	4444	tags=70%, list=14%, signal=81%
MEINHOLD_OVARIAN_CANCER_LOW_GRADE_DN	MEINHOLD_OVARIAN_CANCER_LOW_GRADE_DN		20	-0.73508	-1.91458	0	0.000943	0.413	5113	tags=70%, list=16%, signal=84%
MITOCHONDRIAL_MEMBRANE	MITOCHONDRIAL_MEMBRANE		82	-0.551873	-1.91332	0	0.000966	0.422	5811	tags=55%, list=18%, signal=67%
GSE5542_IFNG_VS_IFNA_TREATED_EPITHELIAL_CELLS_6H_UP	GSE5542_IFNG_VS_IFNA_TREATED_EPITHELIAL_CELLS_6H_UP		187	-0.494525	-1.91283	0	0.000973	0.424	4556	tags=46%, list=14%, signal=53%
GSE18791_CTRL_VS_NEWCASTLE_VIRUS_DC_14H_UP	GSE18791_CTRL_VS_NEWCASTLE_VIRUS_DC_14H_UP		189	-0.491604	-1.911	0	0.00100311	0.435	3962	tags=43%, list=13%, signal=49%
MODULE_352	MODULE_352		17	-0.759106	-1.91027	0	0.00101379	0.44	5848	tags=76%, list=19%, signal=94%
CAFFAREL_RESPONSE_TO_THC_DN	CAFFAREL_RESPONSE_TO_THC_DN		29	-0.675424	-1.90978	0	0.00102102	0.443	3680	tags=59%, list=12%, signal=66%
AMIT_SERUM_RESPONSE_480_MCF10A	AMIT_SERUM_RESPONSE_480_MCF10A		29	-0.682166	-1.90968	0	0.00101953	0.443	2595	tags=48%, list=8%, signal=53%
MITOCHONDRIAL_TRANSPORT	MITOCHONDRIAL_TRANSPORT		21	-0.709671	-1.90937	0.00248139	0.0010285	0.447	4102	tags=62%, list=13%, signal=71%
GCM_HDAC1	GCM_HDAC1		38	-0.641502	-1.90636	0	0.00108071	0.465	4896	tags=58%, list=16%, signal=68%
THILLAINADESAN_ZNF217_TARGETS_UP	THILLAINADESAN_ZNF217_TARGETS_UP		43	-0.627025	-1.90578	0	0.00109645	0.468	4210	tags=51%, list=13%, signal=59%
STK33_SKM_DN	STK33_SKM_DN		239	-0.482259	-1.90528	0	0.00110532	0.469	2951	tags=31%, list=9%, signal=34%
MODULE_35	MODULE_35		16	-0.76481	-1.90429	0.00239234	0.00111931	0.473	2184	tags=63%, list=7%, signal=67%
MODULE_77	MODULE_77		28	-0.668124	-1.90369	0.0027248	0.00113334	0.477	4034	tags=54%, list=13%, signal=61%
MARTENS_TRETINOIN_RESPONSE_DN	MARTENS_TRETINOIN_RESPONSE_DN		766	-0.436862	-1.90361	0	0.00113688	0.48	4257	tags=36%, list=14%, signal=40%
GSE28737_BCL6_HET_VS_BCL6_KO_MARGINAL_ZONE_BCELL_DN	GSE28737_BCL6_HET_VS_BCL6_KO_MARGINAL_ZONE_BCELL_DN		190	-0.489174	-1.90326	0	0.00113695	0.481	3599	tags=41%, list=11%, signal=45%
GSE3720_VD1_VS_VD2_GAMMADELTA_TCELL_UP	GSE3720_VD1_VS_VD2_GAMMADELTA_TCELL_UP		165	-0.505962	-1.90268	0	0.00114737	0.484	3634	tags=41%, list=12%, signal=46%
KALMA_E2F1_TARGETS	KALMA_E2F1_TARGETS		11	-0.843301	-1.90209	0.00248756	0.0011562	0.485	1808	tags=73%, list=6%, signal=77%
BIOCARTA_SARS_PATHWAY	BIOCARTA_SARS_PATHWAY		10	-0.858735	-1.9007	0.00252525	0.0011666	0.489	2730	tags=60%, list=9%, signal=66%
MONTERO_THYROID_CANCER_POOR_SURVIVAL_UP	MONTERO_THYROID_CANCER_POOR_SURVIVAL_UP		12	-0.826662	-1.90055	0	0.00116662	0.489	5299	tags=92%, list=17%, signal=110%
REACTOME_E2F_MEDIATED_REGULATION_OF_DNA_REPLICATION	REACTOME_E2F_MEDIATED_REGULATION_OF_DNA_REPLICATION		33	-0.665507	-1.89972	0	0.00117688	0.492	3280	tags=61%, list=10%, signal=68%
REACTOME_NUCLEOTIDE_EXCISION_REPAIR	REACTOME_NUCLEOTIDE_EXCISION_REPAIR		49	-0.596033	-1.89962	0	0.00117691	0.493	5320	tags=59%, list=17%, signal=71%
REACTOME_GLOBAL_GENOMIC_NER_GG_NER	REACTOME_GLOBAL_GENOMIC_NER_GG_NER		33	-0.651182	-1.89904	0	0.00119065	0.499	4536	tags=58%, list=14%, signal=67%
REICHERT_MITOSIS_LIN9_TARGETS	REICHERT_MITOSIS_LIN9_TARGETS		28	-0.671768	-1.89766	0	0.00120767	0.504	4188	tags=64%, list=13%, signal=74%
MORF_PPP2R4	MORF_PPP2R4		48	-0.603131	-1.89582	0	0.00125003	0.518	4171	tags=44%, list=13%, signal=50%
REACTOME_G1_S_SPECIFIC_TRANSCRIPTION	REACTOME_G1_S_SPECIFIC_TRANSCRIPTION		18	-0.742258	-1.89576	0.00266667	0.00124994	0.519	3280	tags=78%, list=10%, signal=87%
RIBOSOMAL_SUBUNIT	RIBOSOMAL_SUBUNIT		20	-0.734158	-1.89538	0	0.00125835	0.523	3353	tags=70%, list=11%, signal=78%
GSE22886_NEUTROPHIL_VS_DC_DN	GSE22886_NEUTROPHIL_VS_DC_DN		194	-0.490967	-1.8949	0	0.00125994	0.524	5603	tags=54%, list=18%, signal=65%
GSE23321_EFFECTOR_MEMORY_VS_NAIVE_CD8_TCELL_DN	GSE23321_EFFECTOR_MEMORY_VS_NAIVE_CD8_TCELL_DN		181	-0.486181	-1.89379	0	0.00128516	0.529	3832	tags=51%, list=12%, signal=58%
GSE24634_NAIVE_CD4_TCELL_VS_DAY7_IL4_CONV_TREG_DN	GSE24634_NAIVE_CD4_TCELL_VS_DAY7_IL4_CONV_TREG_DN		197	-0.484151	-1.89324	0	0.0013003	0.533	4100	tags=48%, list=13%, signal=55%
GSE39820_TGFBETA3_IL6_VS_TGFBETA3_IL6_IL23A_TREATED_CD4_TCELL_DN	GSE39820_TGFBETA3_IL6_VS_TGFBETA3_IL6_IL23A_TREATED_CD4_TCELL_DN		176	-0.489289	-1.89175	0	0.00133394	0.545	4070	tags=35%, list=13%, signal=40%
RICKMAN_TUMOR_DIFFERENTIATED_MODERATELY_VS_POORLY_DN	RICKMAN_TUMOR_DIFFERENTIATED_MODERATELY_VS_POORLY_DN		14	-0.776668	-1.89103	0.00239234	0.00134883	0.551	3421	tags=57%, list=11%, signal=64%
SGCGSSAAA_V$E2F1DP2_01	SGCGSSAAA_V$E2F1DP2_01		162	-0.496013	-1.89056	0	0.00136201	0.556	4125	tags=41%, list=13%, signal=47%
WAKASUGI_HAVE_ZNF143_BINDING_SITES	WAKASUGI_HAVE_ZNF143_BINDING_SITES		58	-0.581915	-1.89044	0	0.00136009	0.556	4756	tags=52%, list=15%, signal=61%
INTRAMOLECULAR_OXIDOREDUCTASE_ACTIVITY	INTRAMOLECULAR_OXIDOREDUCTASE_ACTIVITY		17	-0.746758	-1.89023	0	0.00136314	0.558	4127	tags=59%, list=13%, signal=68%
CAFFAREL_RESPONSE_TO_THC_8HR_3_DN	CAFFAREL_RESPONSE_TO_THC_8HR_3_DN		10	-0.855883	-1.89015	0.00232019	0.00136123	0.558	1901	tags=60%, list=6%, signal=64%
KEGG_HOMOLOGOUS_RECOMBINATION	KEGG_HOMOLOGOUS_RECOMBINATION		28	-0.671109	-1.89012	0	0.00135933	0.558	5274	tags=71%, list=17%, signal=86%
GSE13547_CTRL_VS_ANTI_IGM_STIM_ZFX_KO_BCELL_2H_UP	GSE13547_CTRL_VS_ANTI_IGM_STIM_ZFX_KO_BCELL_2H_UP		158	-0.496694	-1.89006	0	0.0013591	0.559	4390	tags=49%, list=14%, signal=56%
REACTOME_DOUBLE_STRAND_BREAK_REPAIR	REACTOME_DOUBLE_STRAND_BREAK_REPAIR		22	-0.698732	-1.88965	0	0.00136877	0.563	5274	tags=77%, list=17%, signal=93%
POMEROY_MEDULLOBLASTOMA_PROGNOSIS_DN	POMEROY_MEDULLOBLASTOMA_PROGNOSIS_DN		42	-0.610638	-1.8896	0	0.00136853	0.563	3983	tags=43%, list=13%, signal=49%
MODULE_245	MODULE_245		25	-0.710883	-1.88846	0	0.00139478	0.569	2742	tags=56%, list=9%, signal=61%
NUCLEOTIDYLTRANSFERASE_ACTIVITY	NUCLEOTIDYLTRANSFERASE_ACTIVITY		46	-0.59676	-1.88796	0	0.00140287	0.572	4127	tags=50%, list=13%, signal=57%
MARKEY_RB1_CHRONIC_LOF_UP	MARKEY_RB1_CHRONIC_LOF_UP		103	-0.529574	-1.88737	0	0.00141575	0.574	3066	tags=38%, list=10%, signal=42%
NUCLEAR_MEMBRANE_PART	NUCLEAR_MEMBRANE_PART		40	-0.626033	-1.88723	0	0.00141869	0.575	5496	tags=60%, list=17%, signal=73%
MORF_UBE2I	MORF_UBE2I		236	-0.472183	-1.88622	0	0.00145488	0.583	5395	tags=43%, list=17%, signal=52%
REACTOME_RNA_POL_II_TRANSCRIPTION	REACTOME_RNA_POL_II_TRANSCRIPTION		97	-0.521803	-1.88606	0	0.00145614	0.585	6115	tags=54%, list=19%, signal=66%
GSE37532_VISCERAL_ADIPOSE_TISSUE_VS_LN_DERIVED_PPARG_KO_TCONV_CD4_TCELL_UP	GSE37532_VISCERAL_ADIPOSE_TISSUE_VS_LN_DERIVED_PPARG_KO_TCONV_CD4_TCELL_UP		158	-0.495528	-1.88592	0	0.00146242	0.587	5667	tags=49%, list=18%, signal=59%
MORF_PSMC1	MORF_PSMC1		185	-0.48924	-1.88527	0	0.00147027	0.591	5534	tags=50%, list=18%, signal=60%
YU_BAP1_TARGETS	YU_BAP1_TARGETS		29	-0.664091	-1.88445	0.00295858	0.00148639	0.596	4610	tags=69%, list=15%, signal=81%
MODULE_3	MODULE_3		374	-0.457184	-1.88403	0	0.00149257	0.597	3614	tags=42%, list=11%, signal=47%
BROWN_MYELOID_CELL_DEVELOPMENT_DN	BROWN_MYELOID_CELL_DEVELOPMENT_DN		121	-0.510676	-1.88394	0	0.00149219	0.597	3359	tags=48%, list=11%, signal=53%
GRAHAM_CML_QUIESCENT_VS_CML_DIVIDING_DN	GRAHAM_CML_QUIESCENT_VS_CML_DIVIDING_DN		10	-0.871712	-1.88379	0	0.00149676	0.6	2823	tags=70%, list=9%, signal=77%
GSE14769_UNSTIM_VS_240MIN_LPS_BMDM_UP	GSE14769_UNSTIM_VS_240MIN_LPS_BMDM_UP		190	-0.487214	-1.8836	0	0.00150117	0.601	4334	tags=44%, list=14%, signal=51%
GSE41867_NAIVE_VS_EFFECTOR_CD8_TCELL_UP	GSE41867_NAIVE_VS_EFFECTOR_CD8_TCELL_UP		191	-0.483455	-1.88252	0	0.00151711	0.607	4650	tags=47%, list=15%, signal=54%
JAIN_NFKB_SIGNALING	JAIN_NFKB_SIGNALING		73	-0.550951	-1.88193	0	0.00151832	0.607	5581	tags=55%, list=18%, signal=66%
MODULE_160	MODULE_160		15	-0.788437	-1.88186	0.00479616	0.00151786	0.607	2184	tags=67%, list=7%, signal=72%
MODULE_110	MODULE_110		16	-0.770725	-1.87982	0	0.00157757	0.624	5667	tags=88%, list=18%, signal=107%
GROSS_HYPOXIA_VIA_HIF1A_UP	GROSS_HYPOXIA_VIA_HIF1A_UP		74	-0.563319	-1.8794	0	0.00159001	0.626	4649	tags=49%, list=15%, signal=57%
MORF_CTBP1	MORF_CTBP1		167	-0.493213	-1.87824	0	0.00162204	0.63	5695	tags=47%, list=18%, signal=57%
GSE3982_MAST_CELL_VS_TH2_DN	GSE3982_MAST_CELL_VS_TH2_DN		186	-0.48123	-1.87781	0	0.00162628	0.631	3894	tags=42%, list=12%, signal=48%
EIF4E_UP	EIF4E_UP		87	-0.540557	-1.87764	0	0.00162734	0.633	4719	tags=45%, list=15%, signal=53%
KEGG_NUCLEOTIDE_EXCISION_REPAIR	KEGG_NUCLEOTIDE_EXCISION_REPAIR		44	-0.594635	-1.87685	0	0.00164456	0.638	6028	tags=68%, list=19%, signal=84%
REACTOME_MRNA_DECAY_BY_3_TO_5_EXORIBONUCLEASE	REACTOME_MRNA_DECAY_BY_3_TO_5_EXORIBONUCLEASE		11	-0.845356	-1.87678	0	0.00164393	0.639	3704	tags=73%, list=12%, signal=82%
BURTON_ADIPOGENESIS_6	BURTON_ADIPOGENESIS_6		178	-0.490201	-1.87548	0	0.00168346	0.646	4516	tags=42%, list=14%, signal=49%
DAIRKEE_CANCER_PRONE_RESPONSE_BPA_E2	DAIRKEE_CANCER_PRONE_RESPONSE_BPA_E2		109	-0.522363	-1.87323	0	0.00173293	0.657	4401	tags=44%, list=14%, signal=51%
REACTOME_ER_PHAGOSOME_PATHWAY	REACTOME_ER_PHAGOSOME_PATHWAY		58	-0.572161	-1.87263	0	0.00174669	0.661	6149	tags=60%, list=20%, signal=75%
GSE40274_CTRL_VS_FOXP3_AND_GATA1_TRANSDUCED_ACTIVATED_CD4_TCELL_DN	GSE40274_CTRL_VS_FOXP3_AND_GATA1_TRANSDUCED_ACTIVATED_CD4_TCELL_DN		126	-0.509299	-1.87239	0	0.0017508	0.663	3401	tags=36%, list=11%, signal=40%
S_PHASE	S_PHASE		14	-0.766839	-1.87234	0.00254453	0.00174845	0.663	2382	tags=50%, list=8%, signal=54%
DNA_DEPENDENT_DNA_REPLICATION	DNA_DEPENDENT_DNA_REPLICATION		55	-0.573691	-1.87171	0	0.00176209	0.666	6550	tags=64%, list=21%, signal=80%
GSE7764_IL15_NK_CELL_24H_VS_SPLENOCYTE_UP	GSE7764_IL15_NK_CELL_24H_VS_SPLENOCYTE_UP		185	-0.479432	-1.87157	0	0.00176295	0.666	4188	tags=43%, list=13%, signal=50%
YAO_TEMPORAL_RESPONSE_TO_PROGESTERONE_CLUSTER_13	YAO_TEMPORAL_RESPONSE_TO_PROGESTERONE_CLUSTER_13		167	-0.48583	-1.87023	0	0.00182253	0.68	5534	tags=50%, list=18%, signal=60%
STEGER_ADIPOGENESIS_UP	STEGER_ADIPOGENESIS_UP		20	-0.731412	-1.8684	0	0.00189159	0.7	3910	tags=40%, list=12%, signal=46%
DAIRKEE_CANCER_PRONE_RESPONSE_BPA	DAIRKEE_CANCER_PRONE_RESPONSE_BPA		48	-0.589685	-1.86675	0	0.00193667	0.708	2613	tags=44%, list=8%, signal=48%
MODULE_397	MODULE_397		115	-0.511665	-1.86573	0	0.00196723	0.715	5033	tags=44%, list=16%, signal=53%
MODULE_299	MODULE_299		33	-0.643976	-1.86461	0	0.00199627	0.721	2436	tags=61%, list=8%, signal=66%
GSE4142_PLASMA_CELL_VS_MEMORY_BCELL_DN	GSE4142_PLASMA_CELL_VS_MEMORY_BCELL_DN		178	-0.489795	-1.86373	0	0.00202365	0.725	4369	tags=37%, list=14%, signal=42%
GCM_ANP32B	GCM_ANP32B		36	-0.627291	-1.86353	0	0.00202733	0.725	5183	tags=53%, list=16%, signal=63%
GSE41867_NAIVE_VS_DAY8_LCMV_EFFECTOR_CD8_TCELL_UP	GSE41867_NAIVE_VS_DAY8_LCMV_EFFECTOR_CD8_TCELL_UP		181	-0.482711	-1.86216	0	0.00205933	0.732	4655	tags=43%, list=15%, signal=50%
M_PHASE	M_PHASE		110	-0.509629	-1.86159	0	0.00207231	0.736	4018	tags=46%, list=13%, signal=53%
GSE12845_NAIVE_VS_PRE_GC_TONSIL_BCELL_DN	GSE12845_NAIVE_VS_PRE_GC_TONSIL_BCELL_DN		193	-0.484111	-1.8608	0	0.0021026	0.743	5003	tags=53%, list=16%, signal=63%
BURTON_ADIPOGENESIS_10	BURTON_ADIPOGENESIS_10		27	-0.666919	-1.86078	0.00278552	0.00210138	0.743	1585	tags=44%, list=5%, signal=47%
SU_TESTIS	SU_TESTIS		66	-0.558211	-1.85958	0	0.00211903	0.746	4678	tags=41%, list=15%, signal=48%
APPIERTO_RESPONSE_TO_FENRETINIDE_DN	APPIERTO_RESPONSE_TO_FENRETINIDE_DN		49	-0.586092	-1.85862	0	0.00215067	0.753	3773	tags=49%, list=12%, signal=56%
CAFFAREL_RESPONSE_TO_THC_8HR_5_DN	CAFFAREL_RESPONSE_TO_THC_8HR_5_DN		11	-0.836241	-1.85705	0	0.00219175	0.763	3280	tags=73%, list=10%, signal=81%
NUYTTEN_EZH2_TARGETS_DN	NUYTTEN_EZH2_TARGETS_DN		960	-0.426003	-1.85678	0	0.00219363	0.764	4182	tags=39%, list=13%, signal=44%
V$MYCMAX_01	V$MYCMAX_01		224	-0.471963	-1.85664	0	0.00219862	0.765	4529	tags=45%, list=14%, signal=52%
GCNP_SHH_UP_LATE.V1_UP	GCNP_SHH_UP_LATE.V1_UP		168	-0.485499	-1.85565	0	0.00222692	0.771	3880	tags=40%, list=12%, signal=45%
BIOCARTA_ATRBRCA_PATHWAY	BIOCARTA_ATRBRCA_PATHWAY		21	-0.707062	-1.85533	0.00271003	0.00223655	0.774	5188	tags=76%, list=16%, signal=91%
GRADE_METASTASIS_DN	GRADE_METASTASIS_DN		44	-0.59368	-1.85518	0	0.00223981	0.775	5882	tags=64%, list=19%, signal=78%
MODULE_253	MODULE_253		21	-0.718878	-1.85517	0.00276243	0.00223689	0.775	5592	tags=67%, list=18%, signal=81%
GSE22886_NAIVE_CD4_TCELL_VS_48H_ACT_TH2_DN	GSE22886_NAIVE_CD4_TCELL_VS_48H_ACT_TH2_DN		188	-0.480773	-1.85468	0	0.00225274	0.777	5666	tags=49%, list=18%, signal=59%
M_PHASE_OF_MITOTIC_CELL_CYCLE	M_PHASE_OF_MITOTIC_CELL_CYCLE		83	-0.5363	-1.85398	0	0.00227296	0.783	4018	tags=48%, list=13%, signal=55%
ENDONUCLEASE_ACTIVITY_GO_0016893	ENDONUCLEASE_ACTIVITY_GO_0016893		11	-0.850744	-1.85369	0	0.00228239	0.785	4704	tags=100%, list=15%, signal=118%
BURTON_ADIPOGENESIS_5	BURTON_ADIPOGENESIS_5		115	-0.50842	-1.85322	0	0.00229945	0.786	4838	tags=51%, list=15%, signal=60%
DELPUECH_FOXO3_TARGETS_DN	DELPUECH_FOXO3_TARGETS_DN		36	-0.615064	-1.85315	0	0.00230105	0.786	3278	tags=53%, list=10%, signal=59%
MODULE_388	MODULE_388		17	-0.761435	-1.85292	0	0.00230109	0.786	3399	tags=76%, list=11%, signal=86%
GSE22886_DAY0_VS_DAY7_MONOCYTE_IN_CULTURE_DN	GSE22886_DAY0_VS_DAY7_MONOCYTE_IN_CULTURE_DN		186	-0.482745	-1.85281	0	0.00229965	0.786	3300	tags=42%, list=10%, signal=47%
KEGG_VALINE_LEUCINE_AND_ISOLEUCINE_BIOSYNTHESIS	KEGG_VALINE_LEUCINE_AND_ISOLEUCINE_BIOSYNTHESIS		10	-0.852504	-1.85093	0.00233645	0.00236299	0.797	3609	tags=80%, list=11%, signal=90%
SCHLINGEMANN_SKIN_CARCINOGENESIS_TPA_UP	SCHLINGEMANN_SKIN_CARCINOGENESIS_TPA_UP		31	-0.65016	-1.84936	0	0.00242591	0.801	4041	tags=35%, list=13%, signal=41%
GCM_APEX1	GCM_APEX1		114	-0.509024	-1.84834	0	0.00245958	0.806	5626	tags=47%, list=18%, signal=57%
GSE32423_MEMORY_VS_NAIVE_CD8_TCELL_IL7_DN	GSE32423_MEMORY_VS_NAIVE_CD8_TCELL_IL7_DN		176	-0.482964	-1.84807	0	0.00247628	0.809	3129	tags=34%, list=10%, signal=38%
WANG_CLASSIC_ADIPOGENIC_TARGETS_OF_PPARG	WANG_CLASSIC_ADIPOGENIC_TARGETS_OF_PPARG		23	-0.691209	-1.84807	0	0.00247311	0.809	4457	tags=48%, list=14%, signal=56%
GSE3039_CD4_TCELL_VS_B2_BCELL_DN	GSE3039_CD4_TCELL_VS_B2_BCELL_DN		189	-0.477235	-1.84762	0	0.00248679	0.811	4887	tags=43%, list=16%, signal=51%
REACTOME_REPAIR_SYNTHESIS_FOR_GAP_FILLING_BY_DNA_POL_IN_TC_NER	REACTOME_REPAIR_SYNTHESIS_FOR_GAP_FILLING_BY_DNA_POL_IN_TC_NER		14	-0.778464	-1.84704	0	0.002508	0.816	2927	tags=79%, list=9%, signal=87%
GSE6674_ANTI_IGM_VS_PL2_3_STIM_BCELL_DN	GSE6674_ANTI_IGM_VS_PL2_3_STIM_BCELL_DN		196	-0.478126	-1.84689	0	0.00250934	0.816	3619	tags=43%, list=12%, signal=49%
GSE40274_CTRL_VS_FOXP3_AND_PBX1_TRANSDUCED_ACTIVATED_CD4_TCELL_DN	GSE40274_CTRL_VS_FOXP3_AND_PBX1_TRANSDUCED_ACTIVATED_CD4_TCELL_DN		137	-0.489888	-1.84674	0	0.00251218	0.818	4678	tags=41%, list=15%, signal=48%
ONDER_CDH1_TARGETS_1_DN	ONDER_CDH1_TARGETS_1_DN		153	-0.488149	-1.84609	0	0.00253173	0.823	4265	tags=42%, list=14%, signal=48%
GENTLES_LEUKEMIC_STEM_CELL_DN	GENTLES_LEUKEMIC_STEM_CELL_DN		16	-0.740885	-1.84599	0.00498753	0.00253457	0.825	2036	tags=50%, list=6%, signal=53%
GSE6674_UNSTIM_VS_ANTI_IGM_AND_CPG_STIM_BCELL_DN	GSE6674_UNSTIM_VS_ANTI_IGM_AND_CPG_STIM_BCELL_DN		191	-0.479046	-1.84557	0	0.00254193	0.828	4186	tags=47%, list=13%, signal=54%
V$E2F_02	V$E2F_02		224	-0.464534	-1.84528	0	0.00255071	0.829	4125	tags=40%, list=13%, signal=45%
GSE37301_LYMPHOID_PRIMED_MPP_VS_RAG2_KO_NK_CELL_UP	GSE37301_LYMPHOID_PRIMED_MPP_VS_RAG2_KO_NK_CELL_UP		189	-0.481244	-1.84473	0	0.0025686	0.834	3722	tags=48%, list=12%, signal=54%
BASSO_B_LYMPHOCYTE_NETWORK	BASSO_B_LYMPHOCYTE_NETWORK		136	-0.496597	-1.84371	0	0.00261215	0.836	3313	tags=49%, list=11%, signal=54%
REACTOME_PURINE_RIBONUCLEOSIDE_MONOPHOSPHATE_BIOSYNTHESIS	REACTOME_PURINE_RIBONUCLEOSIDE_MONOPHOSPHATE_BIOSYNTHESIS		11	-0.839411	-1.84247	0	0.00264803	0.84	3087	tags=91%, list=10%, signal=101%
SPLICEOSOME	SPLICEOSOME		51	-0.58563	-1.84081	0	0.00271266	0.849	5830	tags=59%, list=19%, signal=72%
KEGG_CELL_CYCLE	KEGG_CELL_CYCLE		122	-0.506262	-1.84023	0	0.00273027	0.852	4206	tags=46%, list=13%, signal=53%
GNF2_G22P1	GNF2_G22P1		36	-0.621715	-1.84021	0	0.00272683	0.852	4487	tags=53%, list=14%, signal=61%
MODULE_355	MODULE_355		27	-0.660857	-1.83963	0.00544959	0.00274901	0.855	2436	tags=59%, list=8%, signal=64%
REACTOME_HIV_LIFE_CYCLE	REACTOME_HIV_LIFE_CYCLE		111	-0.516538	-1.83863	0	0.00279207	0.859	5581	tags=50%, list=18%, signal=61%
MATHEW_FANCONI_ANEMIA_GENES	MATHEW_FANCONI_ANEMIA_GENES		11	-0.822104	-1.83846	0.00240385	0.00279604	0.86	4265	tags=82%, list=14%, signal=95%
REACTOME_TRANSCRIPTION_COUPLED_NER_TC_NER	REACTOME_TRANSCRIPTION_COUPLED_NER_TC_NER		44	-0.591332	-1.83723	0	0.00283761	0.862	5320	tags=59%, list=17%, signal=71%
GSE24671_BAKIMULC_VS_SENDAI_VIRUS_INFECTED_MOUSE_SPLENOCYTES_UP	GSE24671_BAKIMULC_VS_SENDAI_VIRUS_INFECTED_MOUSE_SPLENOCYTES_UP		185	-0.479884	-1.83675	0	0.00285957	0.864	4441	tags=43%, list=14%, signal=50%
SHAFFER_IRF4_TARGETS_IN_ACTIVATED_B_LYMPHOCYTE	SHAFFER_IRF4_TARGETS_IN_ACTIVATED_B_LYMPHOCYTE		78	-0.542539	-1.83639	0	0.00287093	0.864	3490	tags=55%, list=11%, signal=62%
MODULE_18	MODULE_18		419	-0.441346	-1.83614	0	0.00287783	0.866	4244	tags=44%, list=13%, signal=50%
REACTOME_POL_SWITCHING	REACTOME_POL_SWITCHING		13	-0.794836	-1.83607	0.002331	0.00287574	0.866	2927	tags=77%, list=9%, signal=85%
V$E2F4DP1_01	V$E2F4DP1_01		228	-0.4648	-1.83502	0	0.00292701	0.871	4125	tags=41%, list=13%, signal=47%
GSE3982_BCELL_VS_TH2_DN	GSE3982_BCELL_VS_TH2_DN		180	-0.477956	-1.83448	0	0.0029457	0.872	3795	tags=42%, list=12%, signal=47%
GSE28237_FOLLICULAR_VS_EARLY_GC_BCELL_DN	GSE28237_FOLLICULAR_VS_EARLY_GC_BCELL_DN		188	-0.475446	-1.83419	0	0.00295833	0.872	5286	tags=45%, list=17%, signal=54%
GSE2770_UNTREATED_VS_IL12_TREATED_ACT_CD4_TCELL_2H_DN	GSE2770_UNTREATED_VS_IL12_TREATED_ACT_CD4_TCELL_2H_DN		190	-0.473286	-1.83284	0	0.00301245	0.879	4945	tags=49%, list=16%, signal=58%
GSE2405_S_AUREUS_VS_UNTREATED_NEUTROPHIL_DN	GSE2405_S_AUREUS_VS_UNTREATED_NEUTROPHIL_DN		184	-0.473337	-1.83282	0	0.00301018	0.879	4188	tags=48%, list=13%, signal=55%
GSE10273_LOW_IL7_VS_HIGH_IL7_AND_IRF4_IN_IRF4_8_NULL_PRE_BCELL_UP	GSE10273_LOW_IL7_VS_HIGH_IL7_AND_IRF4_IN_IRF4_8_NULL_PRE_BCELL_UP		182	-0.475277	-1.83267	0	0.0030153	0.879	3658	tags=41%, list=12%, signal=46%
JUBAN_TARGETS_OF_SPI1_AND_FLI1_DN	JUBAN_TARGETS_OF_SPI1_AND_FLI1_DN		89	-0.51778	-1.83199	0	0.00303666	0.88	3087	tags=46%, list=10%, signal=51%
MITOCHONDRION_ORGANIZATION_AND_BIOGENESIS	MITOCHONDRION_ORGANIZATION_AND_BIOGENESIS		48	-0.5826	-1.83197	0	0.00303437	0.88	4534	tags=52%, list=14%, signal=61%
MORF_PRKAG1	MORF_PRKAG1		216	-0.466022	-1.83005	0	0.0031098	0.888	5745	tags=46%, list=18%, signal=56%
GSE24142_ADULT_VS_FETAL_EARLY_THYMIC_PROGENITOR_DN	GSE24142_ADULT_VS_FETAL_EARLY_THYMIC_PROGENITOR_DN		181	-0.477433	-1.82993	0	0.00311627	0.888	2973	tags=38%, list=9%, signal=42%
ORGANELLE_INNER_MEMBRANE	ORGANELLE_INNER_MEMBRANE		70	-0.53799	-1.82984	0	0.00311393	0.888	5284	tags=50%, list=17%, signal=60%
MRNA_METABOLIC_PROCESS	MRNA_METABOLIC_PROCESS		84	-0.533444	-1.82951	0	0.00312475	0.889	5787	tags=54%, list=18%, signal=65%
CHEOK_RESPONSE_TO_HD_MTX_UP	CHEOK_RESPONSE_TO_HD_MTX_UP		21	-0.695724	-1.82911	0	0.00314577	0.893	189	tags=33%, list=1%, signal=34%
PUIFFE_INVASION_INHIBITED_BY_ASCITES_UP	PUIFFE_INVASION_INHIBITED_BY_ASCITES_UP		79	-0.523498	-1.82786	0	0.00319902	0.899	4254	tags=47%, list=14%, signal=54%
MORF_ACP1	MORF_ACP1		208	-0.46247	-1.82779	0	0.00319511	0.899	5298	tags=44%, list=17%, signal=53%
GRAESSMANN_RESPONSE_TO_MC_AND_DOXORUBICIN_DN	GRAESSMANN_RESPONSE_TO_MC_AND_DOXORUBICIN_DN		726	-0.422519	-1.82773	0	0.00319552	0.899	5549	tags=45%, list=18%, signal=53%
CHROMOSOME	CHROMOSOME		116	-0.510679	-1.82692	0	0.0032252	0.9	4610	tags=46%, list=15%, signal=53%
MODULE_315	MODULE_315		16	-0.722137	-1.8269	0	0.00322127	0.9	4610	tags=81%, list=15%, signal=95%
KEGG_PARKINSONS_DISEASE	KEGG_PARKINSONS_DISEASE		104	-0.503409	-1.82675	0	0.00321882	0.9	4951	tags=42%, list=16%, signal=50%
V$E2F1DP1RB_01	V$E2F1DP1RB_01		222	-0.455496	-1.82656	0	0.00321781	0.9	3727	tags=38%, list=12%, signal=43%
DNA_METABOLIC_PROCESS	DNA_METABOLIC_PROCESS		249	-0.459751	-1.82629	0	0.00323282	0.904	4140	tags=41%, list=13%, signal=47%
V$E2F_Q6	V$E2F_Q6		224	-0.469442	-1.82603	0	0.00324767	0.904	3727	tags=38%, list=12%, signal=42%
SENGUPTA_NASOPHARYNGEAL_CARCINOMA_UP	SENGUPTA_NASOPHARYNGEAL_CARCINOMA_UP		277	-0.456494	-1.82571	0	0.00326102	0.905	4265	tags=43%, list=14%, signal=49%
GSE17301_CTRL_VS_48H_ACD3_ACD28_IFNA2_STIM_CD8_TCELL_DN	GSE17301_CTRL_VS_48H_ACD3_ACD28_IFNA2_STIM_CD8_TCELL_DN		183	-0.478517	-1.82487	0	0.00330465	0.906	4872	tags=42%, list=15%, signal=49%
GSE557_WT_VS_I_AB_KO_DC_DN	GSE557_WT_VS_I_AB_KO_DC_DN		184	-0.464929	-1.82319	0	0.00336835	0.91	4492	tags=40%, list=14%, signal=47%
CELL_CYCLE_PROCESS	CELL_CYCLE_PROCESS		187	-0.468468	-1.82267	0	0.0033887	0.913	4018	tags=44%, list=13%, signal=50%
GSE3982_MAST_CELL_VS_BASOPHIL_UP	GSE3982_MAST_CELL_VS_BASOPHIL_UP		180	-0.475726	-1.82243	0	0.0033932	0.913	4009	tags=38%, list=13%, signal=44%
V$E2F_Q4	V$E2F_Q4		226	-0.460145	-1.82119	0	0.00345956	0.916	3727	tags=37%, list=12%, signal=42%
GSE29617_CTRL_VS_DAY7_TIV_FLU_VACCINE_PBMC_2008_DN	GSE29617_CTRL_VS_DAY7_TIV_FLU_VACCINE_PBMC_2008_DN		174	-0.474775	-1.82077	0	0.00347264	0.916	4820	tags=43%, list=15%, signal=50%
V$E2F1DP1_01	V$E2F1DP1_01		224	-0.461193	-1.82071	0	0.00347425	0.917	4125	tags=40%, list=13%, signal=45%
MORF_CDC16	MORF_CDC16		72	-0.53595	-1.82011	0	0.00349725	0.917	5695	tags=60%, list=18%, signal=73%
CHUANG_OXIDATIVE_STRESS_RESPONSE_DN	CHUANG_OXIDATIVE_STRESS_RESPONSE_DN		11	-0.808417	-1.81968	0	0.00351884	0.917	3680	tags=64%, list=12%, signal=72%
GSE3691_IFN_PRODUCING_KILLER_DC_VS_PLASMACYTOID_DC_SPLEEN_DN	GSE3691_IFN_PRODUCING_KILLER_DC_VS_PLASMACYTOID_DC_SPLEEN_DN		174	-0.464592	-1.81955	0	0.00351748	0.917	4966	tags=40%, list=16%, signal=48%
ISOMERASE_ACTIVITY	ISOMERASE_ACTIVITY		32	-0.613932	-1.81942	0	0.00351469	0.917	4157	tags=50%, list=13%, signal=58%
PAL_PRMT5_TARGETS_UP	PAL_PRMT5_TARGETS_UP		198	-0.469386	-1.81909	0	0.00351762	0.917	4663	tags=45%, list=15%, signal=52%
DOUBLE_STRAND_BREAK_REPAIR	DOUBLE_STRAND_BREAK_REPAIR		23	-0.663974	-1.81891	0.00295858	0.00352193	0.917	4756	tags=61%, list=15%, signal=72%
MARTINELLI_IMMATURE_NEUTROPHIL_UP	MARTINELLI_IMMATURE_NEUTROPHIL_UP		10	-0.838577	-1.81874	0	0.00352769	0.918	1957	tags=60%, list=6%, signal=64%
MITOSIS	MITOSIS		80	-0.526163	-1.81839	0	0.00353338	0.919	4018	tags=48%, list=13%, signal=54%
GSE14769_UNSTIM_VS_360MIN_LPS_BMDM_UP	GSE14769_UNSTIM_VS_360MIN_LPS_BMDM_UP		189	-0.469485	-1.81834	0	0.00353344	0.919	3962	tags=43%, list=13%, signal=49%
REACTOME_PROCESSIVE_SYNTHESIS_ON_THE_LAGGING_STRAND	REACTOME_PROCESSIVE_SYNTHESIS_ON_THE_LAGGING_STRAND		15	-0.740428	-1.81795	0	0.00354051	0.92	5274	tags=87%, list=17%, signal=104%
KAECH_DAY8_EFF_VS_DAY15_EFF_CD8_TCELL_UP	KAECH_DAY8_EFF_VS_DAY15_EFF_CD8_TCELL_UP		189	-0.465115	-1.81644	0	0.00361962	0.924	4753	tags=44%, list=15%, signal=52%
GSE33424_CD161_HIGH_VS_INT_CD8_TCELL_DN	GSE33424_CD161_HIGH_VS_INT_CD8_TCELL_DN		179	-0.46551	-1.81637	0	0.00361819	0.924	4567	tags=41%, list=15%, signal=47%
GCM_ACTG1	GCM_ACTG1		124	-0.491074	-1.81593	0	0.00363091	0.925	5505	tags=42%, list=18%, signal=51%
GSE17974_CTRL_VS_ACT_IL4_AND_ANTI_IL12_2H_CD4_TCELL_DN	GSE17974_CTRL_VS_ACT_IL4_AND_ANTI_IL12_2H_CD4_TCELL_DN		186	-0.467926	-1.81404	0	0.00371851	0.929	3466	tags=39%, list=11%, signal=44%
BURTON_ADIPOGENESIS_2	BURTON_ADIPOGENESIS_2		68	-0.537863	-1.81403	0	0.00371412	0.929	4672	tags=50%, list=15%, signal=59%
COENZYME_BIOSYNTHETIC_PROCESS	COENZYME_BIOSYNTHETIC_PROCESS		10	-0.822902	-1.8133	0.00472813	0.00373789	0.931	2726	tags=70%, list=9%, signal=77%
MORF_ATOX1	MORF_ATOX1		78	-0.529329	-1.81255	0	0.00378266	0.933	4218	tags=46%, list=13%, signal=53%
GSE557_CIITA_KO_VS_I_AB_KO_DC_DN	GSE557_CIITA_KO_VS_I_AB_KO_DC_DN		184	-0.46747	-1.81223	0	0.00379925	0.933	5284	tags=47%, list=17%, signal=56%
V$E2F4DP2_01	V$E2F4DP2_01		224	-0.461193	-1.81194	0	0.00381019	0.934	4125	tags=40%, list=13%, signal=45%
GARGALOVIC_RESPONSE_TO_OXIDIZED_PHOSPHOLIPIDS_TURQUOISE_DN	GARGALOVIC_RESPONSE_TO_OXIDIZED_PHOSPHOLIPIDS_TURQUOISE_DN		50	-0.562434	-1.81174	0	0.0038169	0.935	3579	tags=56%, list=11%, signal=63%
REACTOME_BIOSYNTHESIS_OF_THE_N_GLYCAN_PRECURSOR_DOLICHOL_LIPID_LINKED_OLIGOSACCHARIDE_LLO_AND_TRANSFER_TO_A_NASCENT_PROTEIN	REACTOME_BIOSYNTHESIS_OF_THE_N_GLYCAN_PRECURSOR_DOLICHOL_LIPID_LINKED_OLIGOSACCHARIDE_LLO_AND_TRANSFER_TO_A_NASCENT_PROTEIN		28	-0.627944	-1.81105	0	0.00384731	0.936	5270	tags=64%, list=17%, signal=77%
REACTOME_METABOLISM_OF_AMINO_ACIDS_AND_DERIVATIVES	REACTOME_METABOLISM_OF_AMINO_ACIDS_AND_DERIVATIVES		172	-0.473132	-1.80989	0	0.00389447	0.936	4882	tags=40%, list=16%, signal=47%
GSE25123_ROSIGLITAZONE_VS_IL4_AND_ROSIGLITAZONE_STIM_PPARG_KO_MACROPHAGE_DAY10_UP	GSE25123_ROSIGLITAZONE_VS_IL4_AND_ROSIGLITAZONE_STIM_PPARG_KO_MACROPHAGE_DAY10_UP		180	-0.465558	-1.80929	0	0.00391651	0.94	5324	tags=47%, list=17%, signal=57%
GSE21033_CTRL_VS_POLYIC_STIM_DC_24H_DN	GSE21033_CTRL_VS_POLYIC_STIM_DC_24H_DN		139	-0.487194	-1.80846	0	0.0039636	0.943	3945	tags=38%, list=13%, signal=43%
GCM_RAD21	GCM_RAD21		37	-0.605035	-1.80833	0	0.00397012	0.943	4700	tags=51%, list=15%, signal=60%
PROTEIN_TARGETING_TO_MITOCHONDRION	PROTEIN_TARGETING_TO_MITOCHONDRION		11	-0.816751	-1.80797	0.0022779	0.00399618	0.945	5284	tags=91%, list=17%, signal=109%
GSE11924_TFH_VS_TH17_CD4_TCELL_DN	GSE11924_TFH_VS_TH17_CD4_TCELL_DN		183	-0.465122	-1.80759	0	0.00401385	0.945	4427	tags=42%, list=14%, signal=48%
GSE11864_CSF1_VS_CSF1_IFNG_IN_MAC_DN	GSE11864_CSF1_VS_CSF1_IFNG_IN_MAC_DN		175	-0.466845	-1.80755	0	0.00401057	0.945	4491	tags=41%, list=14%, signal=48%
KEGG_BASE_EXCISION_REPAIR	KEGG_BASE_EXCISION_REPAIR		34	-0.615988	-1.80749	0	0.00400731	0.946	4401	tags=68%, list=14%, signal=79%
GSE3039_ALPHAALPHA_VS_ALPHABETA_CD8_TCELL_UP	GSE3039_ALPHAALPHA_VS_ALPHABETA_CD8_TCELL_UP		181	-0.46916	-1.80741	0	0.00400963	0.946	5231	tags=46%, list=17%, signal=55%
GSE27859_DC_VS_CD11C_INT_F480_HI_MACROPHAGE_UP	GSE27859_DC_VS_CD11C_INT_F480_HI_MACROPHAGE_UP		186	-0.46059	-1.80738	0	0.00400913	0.946	5271	tags=52%, list=17%, signal=62%
GNF2_FBL	GNF2_FBL		145	-0.483145	-1.80705	0	0.00402511	0.947	4589	tags=34%, list=15%, signal=40%
RB_P107_DN.V1_DN	RB_P107_DN.V1_DN		119	-0.500233	-1.80699	0	0.00402323	0.947	4942	tags=41%, list=16%, signal=49%
V$E2F1DP2_01	V$E2F1DP2_01		224	-0.461193	-1.80556	0	0.00408043	0.949	4125	tags=40%, list=13%, signal=45%
CHROMOSOMEPERICENTRIC_REGION	CHROMOSOMEPERICENTRIC_REGION		29	-0.639677	-1.80554	0.00277008	0.00407573	0.949	4610	tags=55%, list=15%, signal=65%
REACTOME_RNA_POL_III_TRANSCRIPTION_INITIATION_FROM_TYPE_2_PROMOTER	REACTOME_RNA_POL_III_TRANSCRIPTION_INITIATION_FROM_TYPE_2_PROMOTER		23	-0.661615	-1.80506	0	0.00409714	0.95	4633	tags=57%, list=15%, signal=66%
NUCLEASE_ACTIVITY	NUCLEASE_ACTIVITY		52	-0.566468	-1.80491	0.00295858	0.00409929	0.951	5013	tags=62%, list=16%, signal=73%
GNF2_RBBP6	GNF2_RBBP6		69	-0.530772	-1.80412	0	0.0041451	0.952	6090	tags=52%, list=19%, signal=65%
KEGG_RNA_POLYMERASE	KEGG_RNA_POLYMERASE		29	-0.64204	-1.80398	0.0028169	0.00414444	0.952	4633	tags=55%, list=15%, signal=65%
GSE29617_CTRL_VS_DAY3_TIV_FLU_VACCINE_PBMC_2008_DN	GSE29617_CTRL_VS_DAY3_TIV_FLU_VACCINE_PBMC_2008_DN		185	-0.467687	-1.80384	0	0.00414379	0.952	4757	tags=40%, list=15%, signal=47%
GSE17974_1H_VS_72H_UNTREATED_IN_VITRO_CD4_TCELL_DN	GSE17974_1H_VS_72H_UNTREATED_IN_VITRO_CD4_TCELL_DN		188	-0.470433	-1.80329	0	0.00415835	0.952	4684	tags=43%, list=15%, signal=50%
MODULE_303	MODULE_303		27	-0.648223	-1.80302	0.00566572	0.00416864	0.952	4017	tags=48%, list=13%, signal=55%
REACTOME_REGULATION_OF_MRNA_STABILITY_BY_PROTEINS_THAT_BIND_AU_RICH_ELEMENTS	REACTOME_REGULATION_OF_MRNA_STABILITY_BY_PROTEINS_THAT_BIND_AU_RICH_ELEMENTS		80	-0.518787	-1.80286	0	0.00416933	0.952	4838	tags=52%, list=15%, signal=62%
GSE18791_CTRL_VS_NEWCASTLE_VIRUS_DC_4H_UP	GSE18791_CTRL_VS_NEWCASTLE_VIRUS_DC_4H_UP		174	-0.471852	-1.80205	0	0.00422594	0.955	3545	tags=40%, list=11%, signal=45%
INAMURA_LUNG_CANCER_SCC_SUBTYPES_UP	INAMURA_LUNG_CANCER_SCC_SUBTYPES_UP		14	-0.767746	-1.802	0.00705882	0.00422658	0.955	4148	tags=50%, list=13%, signal=58%
REACTOME_PYRUVATE_METABOLISM	REACTOME_PYRUVATE_METABOLISM		16	-0.729431	-1.80198	0.00236407	0.00422176	0.955	3229	tags=50%, list=10%, signal=56%
TRANSLATION_REGULATOR_ACTIVITY	TRANSLATION_REGULATOR_ACTIVITY		37	-0.59504	-1.80147	0.00285714	0.00424826	0.956	4556	tags=49%, list=14%, signal=57%
REACTOME_EARLY_PHASE_OF_HIV_LIFE_CYCLE	REACTOME_EARLY_PHASE_OF_HIV_LIFE_CYCLE		14	-0.728568	-1.80027	0.0100756	0.0043031	0.957	3941	tags=57%, list=13%, signal=65%
MORF_AP2M1	MORF_AP2M1		213	-0.457357	-1.80023	0	0.00429822	0.957	4665	tags=41%, list=15%, signal=48%
GSE10239_NAIVE_VS_KLRG1HIGH_EFF_CD8_TCELL_DN	GSE10239_NAIVE_VS_KLRG1HIGH_EFF_CD8_TCELL_DN		190	-0.464286	-1.79986	0	0.00431221	0.957	3887	tags=49%, list=12%, signal=56%
KEGG_GLYOXYLATE_AND_DICARBOXYLATE_METABOLISM	KEGG_GLYOXYLATE_AND_DICARBOXYLATE_METABOLISM		14	-0.737576	-1.7988	0.00483092	0.00436415	0.959	4156	tags=64%, list=13%, signal=74%
RIBOSOME	RIBOSOME		38	-0.603468	-1.79821	0	0.00438609	0.959	3678	tags=47%, list=12%, signal=54%
CHR1P12	CHR1P12		13	-0.764738	-1.79726	0	0.00444867	0.96	1993	tags=46%, list=6%, signal=49%
GSE7831_CPG_VS_INFLUENZA_STIM_PDC_4H_DN	GSE7831_CPG_VS_INFLUENZA_STIM_PDC_4H_DN		163	-0.477781	-1.79677	0	0.00447597	0.96	4150	tags=35%, list=13%, signal=40%
TRANSLATION_FACTOR_ACTIVITY_NUCLEIC_ACID_BINDING	TRANSLATION_FACTOR_ACTIVITY_NUCLEIC_ACID_BINDING		35	-0.605307	-1.7965	0	0.00448837	0.962	4556	tags=51%, list=14%, signal=60%
REACTOME_HOMOLOGOUS_RECOMBINATION_REPAIR_OF_REPLICATION_INDEPENDENT_DOUBLE_STRAND_BREAKS	REACTOME_HOMOLOGOUS_RECOMBINATION_REPAIR_OF_REPLICATION_INDEPENDENT_DOUBLE_STRAND_BREAKS		16	-0.723687	-1.79568	0.00742574	0.0045196	0.962	5274	tags=88%, list=17%, signal=105%
COLDREN_GEFITINIB_RESISTANCE_UP	COLDREN_GEFITINIB_RESISTANCE_UP		78	-0.525779	-1.7955	0	0.00452261	0.962	4926	tags=56%, list=16%, signal=67%
FU_INTERACT_WITH_ALKBH8	FU_INTERACT_WITH_ALKBH8		13	-0.768519	-1.79456	0.00248139	0.00459252	0.964	2408	tags=62%, list=8%, signal=67%
GSE37605_FOXP3_FUSION_GFP_VS_IRES_GFP_TREG_NOD_UP	GSE37605_FOXP3_FUSION_GFP_VS_IRES_GFP_TREG_NOD_UP		193	-0.469659	-1.79454	0	0.0045887	0.964	4218	tags=42%, list=13%, signal=48%
HALLMARK_FATTY_ACID_METABOLISM	HALLMARK_FATTY_ACID_METABOLISM		145	-0.47328	-1.7938	0	0.0046236	0.966	4942	tags=45%, list=16%, signal=53%
V$E2F1_Q6	V$E2F1_Q6		222	-0.460004	-1.79324	0	0.00464781	0.966	4225	tags=41%, list=13%, signal=47%
BIOCARTA_HIF_PATHWAY	BIOCARTA_HIF_PATHWAY		15	-0.736712	-1.793	0.00246914	0.00466259	0.966	3386	tags=47%, list=11%, signal=52%
MORI_SMALL_PRE_BII_LYMPHOCYTE_DN	MORI_SMALL_PRE_BII_LYMPHOCYTE_DN		76	-0.523994	-1.79265	0	0.00468406	0.968	4936	tags=45%, list=16%, signal=53%
ZHANG_BREAST_CANCER_PROGENITORS_UP	ZHANG_BREAST_CANCER_PROGENITORS_UP		404	-0.429635	-1.79229	0	0.00470691	0.968	5289	tags=45%, list=17%, signal=53%
BIOCARTA_MCM_PATHWAY	BIOCARTA_MCM_PATHWAY		18	-0.716912	-1.79212	0.00498753	0.00471632	0.97	1756	tags=56%, list=6%, signal=59%
GSE27786_LIN_NEG_VS_NKTCELL_UP	GSE27786_LIN_NEG_VS_NKTCELL_UP		175	-0.46941	-1.79185	0	0.00472567	0.97	4504	tags=49%, list=14%, signal=56%
CHICAS_RB1_TARGETS_GROWING	CHICAS_RB1_TARGETS_GROWING		228	-0.459211	-1.79159	0	0.00473375	0.97	4347	tags=44%, list=14%, signal=51%
GSE2770_IL12_AND_TGFB_VS_IL4_TREATED_ACT_CD4_TCELL_6H_UP	GSE2770_IL12_AND_TGFB_VS_IL4_TREATED_ACT_CD4_TCELL_6H_UP		185	-0.471926	-1.79098	0	0.00476292	0.97	3694	tags=36%, list=12%, signal=40%
MTOR_UP.V1_UP	MTOR_UP.V1_UP		145	-0.474631	-1.79062	0	0.00477873	0.97	3065	tags=37%, list=10%, signal=41%
GSE29164_CD8_TCELL_VS_CD8_TCELL_AND_IL12_TREATED_MELANOMA_DAY7_DN	GSE29164_CD8_TCELL_VS_CD8_TCELL_AND_IL12_TREATED_MELANOMA_DAY7_DN		158	-0.468603	-1.79049	0	0.00477872	0.971	3438	tags=34%, list=11%, signal=38%
GSE29614_CTRL_VS_TIV_FLU_VACCINE_PBMC_2007_DN	GSE29614_CTRL_VS_TIV_FLU_VACCINE_PBMC_2007_DN		145	-0.476971	-1.79039	0	0.00478146	0.971	3478	tags=37%, list=11%, signal=41%
GSE7509_UNSTIM_VS_IFNA_STIM_IMMATURE_DC_UP	GSE7509_UNSTIM_VS_IFNA_STIM_IMMATURE_DC_UP		165	-0.468762	-1.79027	0	0.00478665	0.972	4470	tags=44%, list=14%, signal=51%
REACTOME_FATTY_ACYL_COA_BIOSYNTHESIS	REACTOME_FATTY_ACYL_COA_BIOSYNTHESIS		17	-0.72023	-1.78961	0	0.00482365	0.973	3526	tags=41%, list=11%, signal=46%
MORF_RFC5	MORF_RFC5		68	-0.527829	-1.7894	0	0.00483807	0.975	3480	tags=46%, list=11%, signal=51%
GSE1460_DP_THYMOCYTE_VS_NAIVE_CD4_TCELL_ADULT_BLOOD_UP	GSE1460_DP_THYMOCYTE_VS_NAIVE_CD4_TCELL_ADULT_BLOOD_UP		195	-0.455377	-1.78888	0	0.00487607	0.976	4829	tags=42%, list=15%, signal=49%
LEE_METASTASIS_AND_RNA_PROCESSING_UP	LEE_METASTASIS_AND_RNA_PROCESSING_UP		17	-0.708555	-1.78818	0	0.00493127	0.977	5505	tags=71%, list=18%, signal=86%
LEE_LIVER_CANCER_MYC_DN	LEE_LIVER_CANCER_MYC_DN		54	-0.546848	-1.78763	0.00615385	0.00497314	0.977	2711	tags=28%, list=9%, signal=30%
GSE9509_10MIN_VS_30MIN_LPS_AND_IL10_STIM_IL10_KO_MACROPHAGE_UP	GSE9509_10MIN_VS_30MIN_LPS_AND_IL10_STIM_IL10_KO_MACROPHAGE_UP		161	-0.4704	-1.78735	0	0.00498734	0.977	4150	tags=40%, list=13%, signal=46%
MOREAUX_MULTIPLE_MYELOMA_BY_TACI_DN	MOREAUX_MULTIPLE_MYELOMA_BY_TACI_DN		165	-0.461877	-1.78653	0	0.00502228	0.977	4959	tags=42%, list=16%, signal=49%
MODULE_152	MODULE_152		120	-0.491466	-1.78587	0	0.00506668	0.977	4990	tags=43%, list=16%, signal=51%
KUMAMOTO_RESPONSE_TO_NUTLIN_3A_DN	KUMAMOTO_RESPONSE_TO_NUTLIN_3A_DN		10	-0.817705	-1.7853	0.00226244	0.00509114	0.977	3795	tags=80%, list=12%, signal=91%
GSE32986_UNSTIM_VS_CURDLAN_LOWDOSE_STIM_DC_UP	GSE32986_UNSTIM_VS_CURDLAN_LOWDOSE_STIM_DC_UP		190	-0.454667	-1.78404	0	0.00517437	0.979	2883	tags=35%, list=9%, signal=39%
VEGF_A_UP.V1_DN	VEGF_A_UP.V1_DN		179	-0.458616	-1.78338	0	0.00521822	0.979	5048	tags=50%, list=16%, signal=59%
UDAYAKUMAR_MED1_TARGETS_UP	UDAYAKUMAR_MED1_TARGETS_UP		131	-0.482777	-1.7824	0	0.00529068	0.981	5032	tags=41%, list=16%, signal=49%
MITOTIC_CELL_CYCLE	MITOTIC_CELL_CYCLE		149	-0.475836	-1.781	0	0.00537447	0.982	4018	tags=43%, list=13%, signal=49%
NAKAMURA_METASTASIS_MODEL_UP	NAKAMURA_METASTASIS_MODEL_UP		37	-0.592318	-1.78083	0.00278552	0.00537389	0.982	3408	tags=38%, list=11%, signal=42%
PID_ATM_PATHWAY	PID_ATM_PATHWAY		34	-0.605378	-1.77954	0.00289855	0.00542938	0.982	4016	tags=50%, list=13%, signal=57%
GSE40274_CTRL_VS_FOXP3_AND_LEF1_TRANSDUCED_ACTIVATED_CD4_TCELL_DN	GSE40274_CTRL_VS_FOXP3_AND_LEF1_TRANSDUCED_ACTIVATED_CD4_TCELL_DN		155	-0.472197	-1.77869	0	0.00547526	0.983	4743	tags=44%, list=15%, signal=51%
MODULE_509	MODULE_509		13	-0.766576	-1.77745	0	0.00555357	0.984	1913	tags=54%, list=6%, signal=57%
WANG_SMARCE1_TARGETS_DN	WANG_SMARCE1_TARGETS_DN		342	-0.437918	-1.77658	0	0.00559834	0.984	4363	tags=39%, list=14%, signal=45%
RNA_POLYMERASE_ACTIVITY	RNA_POLYMERASE_ACTIVITY		16	-0.73393	-1.7757	0.0025641	0.00564539	0.984	3880	tags=63%, list=12%, signal=71%
GSE2770_IL12_VS_IL4_TREATED_ACT_CD4_TCELL_48H_UP	GSE2770_IL12_VS_IL4_TREATED_ACT_CD4_TCELL_48H_UP		187	-0.454168	-1.77533	0	0.00567031	0.985	5568	tags=47%, list=18%, signal=56%
GSE17301_ACD3_ACD28_VS_ACD3_ACD28_AND_IFNA2_STIM_CD8_TCELL_UP	GSE17301_ACD3_ACD28_VS_ACD3_ACD28_AND_IFNA2_STIM_CD8_TCELL_UP		181	-0.460667	-1.77393	0	0.00579846	0.987	4293	tags=41%, list=14%, signal=47%
GSE21670_UNTREATED_VS_TGFB_IL6_TREATED_CD4_TCELL_UP	GSE21670_UNTREATED_VS_TGFB_IL6_TREATED_CD4_TCELL_UP		181	-0.457895	-1.77391	0	0.0057935	0.987	5580	tags=49%, list=18%, signal=59%
GSE411_UNSTIM_VS_400MIN_IL6_STIM_MACROPHAGE_DN	GSE411_UNSTIM_VS_400MIN_IL6_STIM_MACROPHAGE_DN		190	-0.454921	-1.77328	0	0.00583109	0.987	4441	tags=42%, list=14%, signal=49%
GSE17721_PAM3CSK4_VS_GADIQUIMOD_6H_BMDM_UP	GSE17721_PAM3CSK4_VS_GADIQUIMOD_6H_BMDM_UP		190	-0.454689	-1.77304	0	0.00584932	0.987	5048	tags=42%, list=16%, signal=49%
CAFFAREL_RESPONSE_TO_THC_24HR_5_DN	CAFFAREL_RESPONSE_TO_THC_24HR_5_DN		56	-0.543341	-1.77152	0	0.00595991	0.99	4529	tags=48%, list=14%, signal=56%
KATSANOU_ELAVL1_TARGETS_DN	KATSANOU_ELAVL1_TARGETS_DN		126	-0.481416	-1.77151	0	0.0059535	0.99	3563	tags=37%, list=11%, signal=42%
DNA_INTEGRITY_CHECKPOINT	DNA_INTEGRITY_CHECKPOINT		23	-0.648392	-1.77121	0	0.00596253	0.99	1850	tags=43%, list=6%, signal=46%
GSE23505_UNTREATED_VS_4DAY_IL6_IL1_TREATED_CD4_TCELL_UP	GSE23505_UNTREATED_VS_4DAY_IL6_IL1_TREATED_CD4_TCELL_UP		193	-0.455066	-1.77063	0	0.00599195	0.99	4502	tags=43%, list=14%, signal=50%
PRC2_EZH2_UP.V1_UP	PRC2_EZH2_UP.V1_UP		173	-0.461715	-1.77043	0	0.00600093	0.99	4173	tags=36%, list=13%, signal=41%
GSE34205_HEALTHY_VS_RSV_INF_INFANT_PBMC_DN	GSE34205_HEALTHY_VS_RSV_INF_INFANT_PBMC_DN		179	-0.459931	-1.77011	0	0.00602001	0.99	3795	tags=33%, list=12%, signal=37%
V$MYC_Q2	V$MYC_Q2		158	-0.466865	-1.76962	0	0.00605326	0.99	4618	tags=39%, list=15%, signal=46%
DAIRKEE_TERT_TARGETS_UP	DAIRKEE_TERT_TARGETS_UP		346	-0.426814	-1.76903	0	0.00608362	0.99	4848	tags=39%, list=15%, signal=46%
KEGG_PYRUVATE_METABOLISM	KEGG_PYRUVATE_METABOLISM		37	-0.591463	-1.76838	0	0.00612937	0.991	3229	tags=49%, list=10%, signal=54%
GSE8621_LPS_PRIMED_UNSTIM_VS_LPS_PRIMED_AND_LPS_STIM_MACROPHAGE_DN	GSE8621_LPS_PRIMED_UNSTIM_VS_LPS_PRIMED_AND_LPS_STIM_MACROPHAGE_DN		189	-0.450366	-1.7682	0	0.00613682	0.992	3651	tags=35%, list=12%, signal=39%
MODULE_124	MODULE_124		93	-0.503746	-1.76797	0	0.00615071	0.992	4610	tags=52%, list=15%, signal=60%
KTGGYRSGAA_UNKNOWN	KTGGYRSGAA_UNKNOWN		71	-0.526949	-1.76774	0	0.00616199	0.993	4459	tags=44%, list=14%, signal=51%
GSE16385_ROSIGLITAZONE_IL4_VS_ROSIGLITAZONE_ALONE_STIM_MACROPHAGE_DN	GSE16385_ROSIGLITAZONE_IL4_VS_ROSIGLITAZONE_ALONE_STIM_MACROPHAGE_DN		189	-0.456403	-1.76717	0	0.00618858	0.994	4789	tags=38%, list=15%, signal=45%
GSE18893_CTRL_VS_TNF_TREATED_TCONV_2H_DN	GSE18893_CTRL_VS_TNF_TREATED_TCONV_2H_DN		188	-0.459685	-1.7671	0	0.00618971	0.994	4688	tags=45%, list=15%, signal=52%
GSE10239_NAIVE_VS_KLRG1INT_EFF_CD8_TCELL_DN	GSE10239_NAIVE_VS_KLRG1INT_EFF_CD8_TCELL_DN		184	-0.453599	-1.76673	0	0.00621222	0.994	3538	tags=40%, list=11%, signal=44%
GSE3039_CD4_TCELL_VS_NKT_CELL_DN	GSE3039_CD4_TCELL_VS_NKT_CELL_DN		189	-0.459915	-1.76495	0	0.00632439	0.994	4656	tags=42%, list=15%, signal=49%
GSE22432_MULTIPOTENT_PROGENITOR_VS_PDC_DN	GSE22432_MULTIPOTENT_PROGENITOR_VS_PDC_DN		188	-0.454039	-1.76493	0	0.00632021	0.994	4745	tags=45%, list=15%, signal=52%
E2F1_UP.V1_UP	E2F1_UP.V1_UP		177	-0.458125	-1.7643	0	0.00635647	0.994	4057	tags=41%, list=13%, signal=46%
IVANOVA_HEMATOPOIESIS_EARLY_PROGENITOR	IVANOVA_HEMATOPOIESIS_EARLY_PROGENITOR		485	-0.421843	-1.76367	0	0.00640518	0.994	4559	tags=38%, list=14%, signal=44%
GSE27786_LSK_VS_NEUTROPHIL_UP	GSE27786_LSK_VS_NEUTROPHIL_UP		186	-0.456372	-1.76157	0	0.00655991	0.994	4073	tags=38%, list=13%, signal=43%
GSE40274_XBP1_VS_FOXP3_AND_XBP1_TRANSDUCED_ACTIVATED_CD4_TCELL_DN	GSE40274_XBP1_VS_FOXP3_AND_XBP1_TRANSDUCED_ACTIVATED_CD4_TCELL_DN		179	-0.454003	-1.76103	0	0.00660063	0.995	3072	tags=36%, list=10%, signal=39%
GSE17721_LPS_VS_PAM3CSK4_12H_BMDM_DN	GSE17721_LPS_VS_PAM3CSK4_12H_BMDM_DN		185	-0.456074	-1.76088	0	0.00660252	0.995	4126	tags=36%, list=13%, signal=41%
ZHAN_V1_LATE_DIFFERENTIATION_GENES_DN	ZHAN_V1_LATE_DIFFERENTIATION_GENES_DN		15	-0.737725	-1.76055	0.00728155	0.00662814	0.995	3254	tags=60%, list=10%, signal=67%
MORF_DAP	MORF_DAP		78	-0.499055	-1.75869	0	0.00678422	0.996	4562	tags=37%, list=15%, signal=43%
CHAUHAN_RESPONSE_TO_METHOXYESTRADIOL_UP	CHAUHAN_RESPONSE_TO_METHOXYESTRADIOL_UP		48	-0.554658	-1.75853	0	0.00678459	0.996	4041	tags=63%, list=13%, signal=72%
WALLACE_JAK2_TARGETS_UP	WALLACE_JAK2_TARGETS_UP		23	-0.653965	-1.75664	0.00536193	0.00691538	0.996	3421	tags=43%, list=11%, signal=49%
RNA_SPLICINGVIA_TRANSESTERIFICATION_REACTIONS	RNA_SPLICINGVIA_TRANSESTERIFICATION_REACTIONS		35	-0.605855	-1.75602	0.00285714	0.00695954	0.996	5605	tags=57%, list=18%, signal=69%
GSE5589_WT_VS_IL6_KO_LPS_AND_IL10_STIM_MACROPHAGE_45MIN_UP	GSE5589_WT_VS_IL6_KO_LPS_AND_IL10_STIM_MACROPHAGE_45MIN_UP		186	-0.455174	-1.7559	0	0.006966	0.996	4562	tags=43%, list=15%, signal=50%
GSE22432_MULTIPOTENT_VS_COMMON_DC_PROGENITOR_UP	GSE22432_MULTIPOTENT_VS_COMMON_DC_PROGENITOR_UP		190	-0.454408	-1.75556	0	0.00698495	0.996	3941	tags=42%, list=13%, signal=47%
ATP_DEPENDENT_RNA_HELICASE_ACTIVITY	ATP_DEPENDENT_RNA_HELICASE_ACTIVITY		17	-0.678597	-1.75395	0.010582	0.00712229	0.996	4508	tags=47%, list=14%, signal=55%
HOXA9_DN.V1_DN	HOXA9_DN.V1_DN		180	-0.451758	-1.75361	0	0.00713867	0.996	3704	tags=41%, list=12%, signal=46%
GSE22886_NAIVE_TCELL_VS_NEUTROPHIL_UP	GSE22886_NAIVE_TCELL_VS_NEUTROPHIL_UP		195	-0.449796	-1.75243	0	0.00723045	0.996	4887	tags=46%, list=16%, signal=54%
GSE15930_NAIVE_VS_72H_IN_VITRO_STIM_CD8_TCELL_DN	GSE15930_NAIVE_VS_72H_IN_VITRO_STIM_CD8_TCELL_DN		188	-0.45923	-1.7523	0	0.00723279	0.996	5072	tags=50%, list=16%, signal=59%
CELL_CYCLE_PHASE	CELL_CYCLE_PHASE		164	-0.461002	-1.75224	0	0.00722652	0.996	4018	tags=43%, list=13%, signal=49%
CHICAS_RB1_TARGETS_LOW_SERUM	CHICAS_RB1_TARGETS_LOW_SERUM		87	-0.503021	-1.75206	0	0.0072351	0.997	4294	tags=43%, list=14%, signal=49%
GOLDRATH_HOMEOSTATIC_PROLIFERATION	GOLDRATH_HOMEOSTATIC_PROLIFERATION		164	-0.461555	-1.75159	0	0.00725609	0.997	4437	tags=42%, list=14%, signal=49%
VANTVEER_BREAST_CANCER_ESR1_DN	VANTVEER_BREAST_CANCER_ESR1_DN		215	-0.446075	-1.75135	0	0.00726969	0.997	3639	tags=37%, list=12%, signal=42%
WILLIAMS_ESR1_TARGETS_UP	WILLIAMS_ESR1_TARGETS_UP		23	-0.645724	-1.75062	0.00977995	0.00732157	0.997	4470	tags=61%, list=14%, signal=71%
WANG_TARGETS_OF_MLL_CBP_FUSION_DN	WANG_TARGETS_OF_MLL_CBP_FUSION_DN		45	-0.562378	-1.74998	0	0.00738411	0.997	4935	tags=62%, list=16%, signal=74%
JOHNSTONE_PARVB_TARGETS_3_DN	JOHNSTONE_PARVB_TARGETS_3_DN		863	-0.399036	-1.74993	0	0.00738022	0.997	5324	tags=43%, list=17%, signal=51%
FERRANDO_HOX11_NEIGHBORS	FERRANDO_HOX11_NEIGHBORS		21	-0.67247	-1.74978	0.00791557	0.00738736	0.997	2642	tags=52%, list=8%, signal=57%
GSE31082_CD4_VS_CD8_SP_THYMOCYTE_DN	GSE31082_CD4_VS_CD8_SP_THYMOCYTE_DN		178	-0.454648	-1.74973	0	0.00738473	0.997	2904	tags=35%, list=9%, signal=39%
GSE24671_BAKIMULC_VS_SENDAI_VIRUS_INFECTED_MOUSE_SPLENOCYTES_DN	GSE24671_BAKIMULC_VS_SENDAI_VIRUS_INFECTED_MOUSE_SPLENOCYTES_DN		180	-0.453028	-1.74958	0	0.00738938	0.997	4537	tags=43%, list=14%, signal=50%
GSE20500_CTRL_VS_RETINOIC_ACID_TREATED_CD4_TCELL_UP	GSE20500_CTRL_VS_RETINOIC_ACID_TREATED_CD4_TCELL_UP		191	-0.457496	-1.74956	0	0.00738302	0.997	4303	tags=42%, list=14%, signal=49%
GSE22886_NEUTROPHIL_VS_MONOCYTE_DN	GSE22886_NEUTROPHIL_VS_MONOCYTE_DN		197	-0.451501	-1.74954	0	0.00737788	0.997	5000	tags=47%, list=16%, signal=56%
GSE12507_PDC_CELL_LINE_VS_IMMATUE_T_CELL_LINE_UP	GSE12507_PDC_CELL_LINE_VS_IMMATUE_T_CELL_LINE_UP		135	-0.469463	-1.74926	0	0.00739738	0.997	5994	tags=47%, list=19%, signal=57%
GSE7768_OVA_ALONE_VS_OVA_WITH_MPL_IMMUNIZED_MOUSE_WHOLE_SPLEEN_6H_UP	GSE7768_OVA_ALONE_VS_OVA_WITH_MPL_IMMUNIZED_MOUSE_WHOLE_SPLEEN_6H_UP		177	-0.454511	-1.74918	0	0.0073971	0.997	5016	tags=50%, list=16%, signal=59%
MODULE_50	MODULE_50		13	-0.740667	-1.74895	0.0147783	0.00741043	0.997	4838	tags=69%, list=15%, signal=82%
GSE39820_CTRL_VS_TGFBETA3_IL6_CD4_TCELL_UP	GSE39820_CTRL_VS_TGFBETA3_IL6_CD4_TCELL_UP		188	-0.450053	-1.74798	0	0.00748363	0.997	4810	tags=45%, list=15%, signal=53%
GSE13547_CTRL_VS_ANTI_IGM_STIM_BCELL_2H_UP	GSE13547_CTRL_VS_ANTI_IGM_STIM_BCELL_2H_UP		172	-0.454727	-1.74742	0	0.00751992	0.997	4113	tags=49%, list=13%, signal=57%
GSE10856_CTRL_VS_TNFRSF6B_IN_MACROPHAGE_DN	GSE10856_CTRL_VS_TNFRSF6B_IN_MACROPHAGE_DN		166	-0.457519	-1.74723	0	0.00753179	0.997	4594	tags=37%, list=15%, signal=43%
REACTOME_GLUCONEOGENESIS	REACTOME_GLUCONEOGENESIS		29	-0.604051	-1.74653	0.00606061	0.00757654	0.997	2648	tags=45%, list=8%, signal=49%
GSE3982_BCELL_VS_TH1_DN	GSE3982_BCELL_VS_TH1_DN		180	-0.452001	-1.74647	0	0.00757739	0.997	3795	tags=41%, list=12%, signal=46%
GSE27786_LIN_NEG_VS_NKCELL_UP	GSE27786_LIN_NEG_VS_NKCELL_UP		183	-0.447994	-1.74646	0	0.00756967	0.997	4745	tags=42%, list=15%, signal=49%
UNFOLDED_PROTEIN_BINDING	UNFOLDED_PROTEIN_BINDING		42	-0.569001	-1.74593	0.00311526	0.00760929	0.997	4127	tags=57%, list=13%, signal=66%
GSE7460_CTRL_VS_FOXP3_OVEREXPR_TCONV_1_UP	GSE7460_CTRL_VS_FOXP3_OVEREXPR_TCONV_1_UP		166	-0.455298	-1.74546	0	0.00763905	0.998	4095	tags=36%, list=13%, signal=41%
REACTOME_AMINO_ACID_SYNTHESIS_AND_INTERCONVERSION_TRANSAMINATION	REACTOME_AMINO_ACID_SYNTHESIS_AND_INTERCONVERSION_TRANSAMINATION		16	-0.710767	-1.74528	0.00255102	0.00764819	0.998	3619	tags=50%, list=12%, signal=56%
GSE27241_WT_VS_RORGT_KO_TH17_POLARIZED_CD4_TCELL_UP	GSE27241_WT_VS_RORGT_KO_TH17_POLARIZED_CD4_TCELL_UP		151	-0.464292	-1.74461	0	0.00770462	0.998	3523	tags=49%, list=11%, signal=55%
GSE10239_MEMORY_VS_KLRG1HIGH_EFF_CD8_TCELL_DN	GSE10239_MEMORY_VS_KLRG1HIGH_EFF_CD8_TCELL_DN		191	-0.450045	-1.7444	0	0.00771982	0.998	4567	tags=41%, list=15%, signal=48%
WANG_IMMORTALIZED_BY_HOXA9_AND_MEIS1_UP	WANG_IMMORTALIZED_BY_HOXA9_AND_MEIS1_UP		28	-0.606067	-1.74369	0.00280899	0.00777129	0.998	1956	tags=32%, list=6%, signal=34%
GSE17721_4H_VS_24H_POLYIC_BMDM_UP	GSE17721_4H_VS_24H_POLYIC_BMDM_UP		183	-0.45576	-1.74355	0	0.007779	0.998	4701	tags=39%, list=15%, signal=45%
MODULE_183	MODULE_183		64	-0.532029	-1.74279	0	0.00784481	0.999	5000	tags=48%, list=16%, signal=57%
REACTOME_LOSS_OF_NLP_FROM_MITOTIC_CENTROSOMES	REACTOME_LOSS_OF_NLP_FROM_MITOTIC_CENTROSOMES		55	-0.536642	-1.74186	0	0.00792244	0.999	4557	tags=53%, list=14%, signal=62%
REACTOME_MITOTIC_G2_G2_M_PHASES	REACTOME_MITOTIC_G2_G2_M_PHASES		77	-0.504375	-1.74157	0	0.00795041	0.999	3976	tags=45%, list=13%, signal=52%
MODULE_53	MODULE_53		369	-0.421565	-1.74067	0	0.00801807	0.999	3667	tags=40%, list=12%, signal=45%
GSE12001_MIR223_KO_VS_WT_NEUTROPHIL_UP	GSE12001_MIR223_KO_VS_WT_NEUTROPHIL_UP		165	-0.457547	-1.74033	0	0.00804602	0.999	5340	tags=45%, list=17%, signal=54%
PUJANA_BREAST_CANCER_LIT_INT_NETWORK	PUJANA_BREAST_CANCER_LIT_INT_NETWORK		100	-0.496525	-1.73953	0	0.00811713	1	4172	tags=48%, list=13%, signal=55%
SCIBETTA_KDM5B_TARGETS_DN	SCIBETTA_KDM5B_TARGETS_DN		78	-0.509914	-1.73939	0	0.00811972	1	3422	tags=42%, list=11%, signal=47%
GSE22886_IL2_VS_IL15_STIM_NKCELL_DN	GSE22886_IL2_VS_IL15_STIM_NKCELL_DN		176	-0.454361	-1.73939	0	0.00811157	1	4300	tags=41%, list=14%, signal=48%
WANG_METASTASIS_OF_BREAST_CANCER_ESR1_UP	WANG_METASTASIS_OF_BREAST_CANCER_ESR1_UP		21	-0.660685	-1.73917	0.00742574	0.00811891	1	5340	tags=67%, list=17%, signal=80%
GSE22886_NAIVE_BCELL_VS_BLOOD_PLASMA_CELL_DN	GSE22886_NAIVE_BCELL_VS_BLOOD_PLASMA_CELL_DN		184	-0.442017	-1.73825	0	0.00819805	1	4076	tags=45%, list=13%, signal=52%
RIBONUCLEOPROTEIN_BINDING	RIBONUCLEOPROTEIN_BINDING		12	-0.738863	-1.73802	0.00473934	0.00820418	1	2804	tags=58%, list=9%, signal=64%
KEGG_RNA_DEGRADATION	KEGG_RNA_DEGRADATION		58	-0.531079	-1.738	0	0.00819721	1	5534	tags=52%, list=18%, signal=63%
GSE45837_WT_VS_GFI1_KO_PDC_DN	GSE45837_WT_VS_GFI1_KO_PDC_DN		196	-0.445637	-1.73777	0	0.00821283	1	5126	tags=44%, list=16%, signal=53%
REACTOME_FANCONI_ANEMIA_PATHWAY	REACTOME_FANCONI_ANEMIA_PATHWAY		21	-0.656112	-1.73507	0.00806452	0.00846775	1	5188	tags=62%, list=16%, signal=74%
GSE26351_UNSTIM_VS_BMP_PATHWAY_STIM_HEMATOPOIETIC_PROGENITORS_UP	GSE26351_UNSTIM_VS_BMP_PATHWAY_STIM_HEMATOPOIETIC_PROGENITORS_UP		190	-0.445759	-1.73482	0	0.00847841	1	4163	tags=38%, list=13%, signal=43%
GSE9316_CD4_TCELL_BALBC_VS_TH17_ENRI_CD4_TCELL_SKG_PMA_IONO_STIM_FR4NEG_UP	GSE9316_CD4_TCELL_BALBC_VS_TH17_ENRI_CD4_TCELL_SKG_PMA_IONO_STIM_FR4NEG_UP		170	-0.448194	-1.73438	0	0.00851266	1	4366	tags=38%, list=14%, signal=44%
SANA_RESPONSE_TO_IFNG_DN	SANA_RESPONSE_TO_IFNG_DN		80	-0.506381	-1.73413	0	0.00853278	1	4372	tags=43%, list=14%, signal=49%
MODULE_485	MODULE_485		46	-0.550932	-1.73409	0	0.00852785	1	4017	tags=41%, list=13%, signal=47%
GSE2405_0H_VS_12H_A_PHAGOCYTOPHILUM_STIM_NEUTROPHIL_DN	GSE2405_0H_VS_12H_A_PHAGOCYTOPHILUM_STIM_NEUTROPHIL_DN		181	-0.451357	-1.73386	0	0.00854775	1	3663	tags=37%, list=12%, signal=42%
GSE22033_UNTREATED_VS_MRL24_TREATED_MEF_UP	GSE22033_UNTREATED_VS_MRL24_TREATED_MEF_UP		187	-0.447347	-1.73354	0	0.00856298	1	4610	tags=44%, list=15%, signal=51%
REACTOME_MICRORNA_MIRNA_BIOGENESIS	REACTOME_MICRORNA_MIRNA_BIOGENESIS		18	-0.666627	-1.73324	0.00531915	0.00858764	1	5320	tags=61%, list=17%, signal=74%
SPINDLE_ORGANIZATION_AND_BIOGENESIS	SPINDLE_ORGANIZATION_AND_BIOGENESIS		11	-0.750985	-1.73216	0	0.00867963	1	5581	tags=91%, list=18%, signal=110%
MODY_HIPPOCAMPUS_NEONATAL	MODY_HIPPOCAMPUS_NEONATAL		32	-0.602838	-1.73183	0	0.00869227	1	1475	tags=31%, list=5%, signal=33%
GSE17721_PAM3CSK4_VS_GADIQUIMOD_8H_BMDM_UP	GSE17721_PAM3CSK4_VS_GADIQUIMOD_8H_BMDM_UP		188	-0.450588	-1.7315	0	0.00871801	1	3856	tags=39%, list=12%, signal=44%
GSE42021_CD24HI_VS_CD24LOW_TREG_THYMUS_UP	GSE42021_CD24HI_VS_CD24LOW_TREG_THYMUS_UP		176	-0.450401	-1.72982	0	0.00890512	1	5022	tags=42%, list=16%, signal=50%
REACTOME_LATE_PHASE_OF_HIV_LIFE_CYCLE	REACTOME_LATE_PHASE_OF_HIV_LIFE_CYCLE		97	-0.48569	-1.72948	0	0.00892911	1	5581	tags=49%, list=18%, signal=60%
HELICASE_ACTIVITY	HELICASE_ACTIVITY		51	-0.546172	-1.72942	0	0.00892378	1	4688	tags=47%, list=15%, signal=55%
STEROID_BIOSYNTHETIC_PROCESS	STEROID_BIOSYNTHETIC_PROCESS		17	-0.693336	-1.72939	0.00255755	0.00891618	1	2699	tags=35%, list=9%, signal=39%
GSE17322_CD103_POS_VS_CD11B_HIGH_LUNG_DC_DN	GSE17322_CD103_POS_VS_CD11B_HIGH_LUNG_DC_DN		188	-0.44496	-1.7284	0	0.00901053	1	5257	tags=47%, list=17%, signal=57%
GLIOGENESIS	GLIOGENESIS		11	-0.750146	-1.72752	0.00777202	0.00908375	1	3429	tags=64%, list=11%, signal=71%
MODULE_451	MODULE_451		32	-0.605756	-1.72661	0.0056338	0.00918134	1	4390	tags=66%, list=14%, signal=76%
HUANG_GATA2_TARGETS_DN	HUANG_GATA2_TARGETS_DN		65	-0.516372	-1.72559	0	0.00925641	1	3516	tags=38%, list=11%, signal=43%
GSE17721_0.5H_VS_8H_POLYIC_BMDM_UP	GSE17721_0.5H_VS_8H_POLYIC_BMDM_UP		182	-0.444525	-1.72539	0	0.00927768	1	4633	tags=43%, list=15%, signal=50%
GSE17721_0.5H_VS_12H_LPS_BMDM_UP	GSE17721_0.5H_VS_12H_LPS_BMDM_UP		185	-0.450905	-1.72534	0	0.00927443	1	4907	tags=41%, list=16%, signal=48%
REACTOME_PERK_REGULATED_GENE_EXPRESSION	REACTOME_PERK_REGULATED_GENE_EXPRESSION		28	-0.607821	-1.7248	0.00731707	0.00932245	1	5111	tags=50%, list=16%, signal=60%
COFACTOR_METABOLIC_PROCESS	COFACTOR_METABOLIC_PROCESS		49	-0.546085	-1.72437	0.00322581	0.00935761	1	5506	tags=53%, list=18%, signal=64%
GSE21063_3H_VS_16H_ANTI_IGM_STIM_NFATC1_KOBCELL_DN	GSE21063_3H_VS_16H_ANTI_IGM_STIM_NFATC1_KOBCELL_DN		189	-0.441188	-1.72412	0	0.00938105	1	3369	tags=36%, list=11%, signal=40%
GSE42088_UNINF_VS_LEISHMANIA_INF_DC_8H_UP	GSE42088_UNINF_VS_LEISHMANIA_INF_DC_8H_UP		180	-0.450251	-1.72284	0	0.00950438	1	3300	tags=33%, list=10%, signal=37%
MODULE_196	MODULE_196		23	-0.623443	-1.72272	0.00821918	0.00950325	1	4775	tags=57%, list=15%, signal=67%
DNA_REPAIR	DNA_REPAIR		122	-0.472583	-1.72262	0	0.00950906	1	4756	tags=46%, list=15%, signal=54%
GSE27786_CD4_VS_CD8_TCELL_DN	GSE27786_CD4_VS_CD8_TCELL_DN		185	-0.449737	-1.72231	0	0.00953342	1	3592	tags=33%, list=11%, signal=37%
JACKSON_DNMT1_TARGETS_DN	JACKSON_DNMT1_TARGETS_DN		21	-0.645189	-1.72099	0.00550964	0.00965149	1	3942	tags=48%, list=13%, signal=54%
WONG_PROTEASOME_GENE_MODULE	WONG_PROTEASOME_GENE_MODULE		49	-0.555947	-1.72077	0	0.00965369	1	4838	tags=51%, list=15%, signal=60%
V$E2F_Q4_01	V$E2F_Q4_01		219	-0.43408	-1.7188	0	0.00986928	1	4225	tags=40%, list=13%, signal=46%
GSE19941_LPS_VS_LPS_AND_IL10_STIM_IL10_KO_MACROPHAGE_UP	GSE19941_LPS_VS_LPS_AND_IL10_STIM_IL10_KO_MACROPHAGE_UP		171	-0.446365	-1.71735	0	0.00998767	1	5250	tags=45%, list=17%, signal=54%
GSE16386_IL4_VS_IL4_AND_ROSIGLITAZONE_STIM_MACROPHAGE_6H_UP	GSE16386_IL4_VS_IL4_AND_ROSIGLITAZONE_STIM_MACROPHAGE_6H_UP		182	-0.453976	-1.71573	0	0.0101453	1	4675	tags=43%, list=15%, signal=51%
GSE10239_MEMORY_VS_DAY4.5_EFF_CD8_TCELL_DN	GSE10239_MEMORY_VS_DAY4.5_EFF_CD8_TCELL_DN		190	-0.44449	-1.71493	0	0.0102199	1	5524	tags=48%, list=18%, signal=58%
GSE25085_FETAL_LIVER_VS_ADULT_BM_SP4_THYMIC_IMPLANT_DN	GSE25085_FETAL_LIVER_VS_ADULT_BM_SP4_THYMIC_IMPLANT_DN		191	-0.447074	-1.71493	0	0.01021	1	4583	tags=43%, list=15%, signal=51%
GSE17721_0.5H_VS_12H_POLYIC_BMDM_UP	GSE17721_0.5H_VS_12H_POLYIC_BMDM_UP		177	-0.444005	-1.71459	0	0.0102394	1	4534	tags=43%, list=14%, signal=50%
GSE37532_WT_VS_PPARG_KO_VISCERAL_ADIPOSE_TISSUE_TCONV_DN	GSE37532_WT_VS_PPARG_KO_VISCERAL_ADIPOSE_TISSUE_TCONV_DN		189	-0.44053	-1.7145	0	0.0102364	1	4487	tags=44%, list=14%, signal=52%
REACTOME_RNA_POL_III_CHAIN_ELONGATION	REACTOME_RNA_POL_III_CHAIN_ELONGATION		17	-0.671132	-1.71348	0.00516796	0.0103457	1	4633	tags=65%, list=15%, signal=76%
CONDENSED_NUCLEAR_CHROMOSOME	CONDENSED_NUCLEAR_CHROMOSOME		17	-0.672005	-1.71273	0.00246305	0.0104012	1	2327	tags=59%, list=7%, signal=63%
GSE22886_DAY1_VS_DAY7_MONOCYTE_IN_CULTURE_DN	GSE22886_DAY1_VS_DAY7_MONOCYTE_IN_CULTURE_DN		189	-0.443047	-1.71096	0	0.0106098	1	3983	tags=41%, list=13%, signal=47%
ZHENG_GLIOBLASTOMA_PLASTICITY_UP	ZHENG_GLIOBLASTOMA_PLASTICITY_UP		234	-0.42992	-1.71086	0	0.0106066	1	3422	tags=35%, list=11%, signal=40%
REACTOME_ACTIVATION_OF_NF_KAPPAB_IN_B_CELLS	REACTOME_ACTIVATION_OF_NF_KAPPAB_IN_B_CELLS		60	-0.526518	-1.71014	0.00310559	0.0106697	1	4838	tags=50%, list=15%, signal=59%
RIZ_ERYTHROID_DIFFERENTIATION	RIZ_ERYTHROID_DIFFERENTIATION		71	-0.509559	-1.7101	0	0.0106663	1	5004	tags=46%, list=16%, signal=55%
TRANSLATION_INITIATION_FACTOR_ACTIVITY	TRANSLATION_INITIATION_FACTOR_ACTIVITY		23	-0.638288	-1.70971	0.0106952	0.0106947	1	3429	tags=52%, list=11%, signal=59%
GSE360_L_MAJOR_VS_T_GONDII_MAC_DN	GSE360_L_MAJOR_VS_T_GONDII_MAC_DN		181	-0.44411	-1.70961	0	0.0106959	1	4260	tags=42%, list=14%, signal=48%
GSE37532_WT_VS_PPARG_KO_VISCERAL_ADIPOSE_TISSUE_TREG_UP	GSE37532_WT_VS_PPARG_KO_VISCERAL_ADIPOSE_TISSUE_TREG_UP		186	-0.434812	-1.70776	0	0.0109191	1	5825	tags=51%, list=19%, signal=62%
GROWTH_CONE	GROWTH_CONE		10	-0.780059	-1.70671	0.00992556	0.0110315	1	3699	tags=50%, list=12%, signal=57%
GSE25123_WT_VS_PPARG_KO_MACROPHAGE_DN	GSE25123_WT_VS_PPARG_KO_MACROPHAGE_DN		187	-0.443745	-1.70612	0	0.0110834	1	4383	tags=41%, list=14%, signal=47%
KEGG_GLYCOLYSIS_GLUCONEOGENESIS	KEGG_GLYCOLYSIS_GLUCONEOGENESIS		53	-0.527049	-1.70469	0	0.0112479	1	3490	tags=36%, list=11%, signal=40%
GSE33162_UNTREATED_VS_4H_LPS_STIM_HDAC3_KO_MACROPHAGE_UP	GSE33162_UNTREATED_VS_4H_LPS_STIM_HDAC3_KO_MACROPHAGE_UP		190	-0.436675	-1.70463	0	0.0112452	1	4086	tags=40%, list=13%, signal=46%
GSE22601_CD4_SINGLE_POSITIVE_VS_CD8_SINGLE_POSITIVE_THYMOCYTE_UP	GSE22601_CD4_SINGLE_POSITIVE_VS_CD8_SINGLE_POSITIVE_THYMOCYTE_UP		191	-0.437079	-1.70459	0	0.0112379	1	3663	tags=39%, list=12%, signal=44%
GSE33292_DN3_THYMOCYTE_VS_TCELL_LYMPHOMA_FROM_TCF1_KO_UP	GSE33292_DN3_THYMOCYTE_VS_TCELL_LYMPHOMA_FROM_TCF1_KO_UP		163	-0.448969	-1.70433	0	0.0112601	1	4719	tags=42%, list=15%, signal=50%
MODULE_93	MODULE_93		165	-0.448422	-1.70413	0	0.0112733	1	4368	tags=36%, list=14%, signal=41%
GSE12366_GC_VS_NAIVE_BCELL_UP	GSE12366_GC_VS_NAIVE_BCELL_UP		185	-0.438202	-1.70218	0	0.0115137	1	4642	tags=38%, list=15%, signal=44%
GSE3982_MAC_VS_CENT_MEMORY_CD4_TCELL_UP	GSE3982_MAC_VS_CENT_MEMORY_CD4_TCELL_UP		185	-0.445091	-1.7012	0	0.0116023	1	4520	tags=41%, list=14%, signal=48%
SLEBOS_HEAD_AND_NECK_CANCER_WITH_HPV_UP	SLEBOS_HEAD_AND_NECK_CANCER_WITH_HPV_UP		73	-0.50519	-1.7009	0	0.0116218	1	4708	tags=51%, list=15%, signal=59%
BARRIER_COLON_CANCER_RECURRENCE_UP	BARRIER_COLON_CANCER_RECURRENCE_UP		41	-0.558736	-1.7001	0	0.0117178	1	4193	tags=41%, list=13%, signal=48%
GSE7509_FCGRIIB_VS_TNFA_IL1B_IL6_PGE_STIM_DC_UP	GSE7509_FCGRIIB_VS_TNFA_IL1B_IL6_PGE_STIM_DC_UP		176	-0.439301	-1.69933	0	0.0117924	1	4977	tags=39%, list=16%, signal=46%
WANG_CISPLATIN_RESPONSE_AND_XPC_UP	WANG_CISPLATIN_RESPONSE_AND_XPC_UP		182	-0.441007	-1.69904	0	0.0118117	1	3752	tags=37%, list=12%, signal=42%
HORTON_SREBF_TARGETS	HORTON_SREBF_TARGETS		24	-0.631318	-1.69755	0.00287356	0.0120151	1	2166	tags=54%, list=7%, signal=58%
INAMURA_LUNG_CANCER_SCC_UP	INAMURA_LUNG_CANCER_SCC_UP		11	-0.742274	-1.6972	0.0114943	0.0120352	1	2545	tags=55%, list=8%, signal=59%
GSE24634_TEFF_VS_TCONV_DAY10_IN_CULTURE_UP	GSE24634_TEFF_VS_TCONV_DAY10_IN_CULTURE_UP		187	-0.437524	-1.69677	0	0.0120841	1	4057	tags=44%, list=13%, signal=50%
METHYLTRANSFERASE_ACTIVITY	METHYLTRANSFERASE_ACTIVITY		32	-0.586346	-1.69671	0.0058651	0.0120761	1	1948	tags=28%, list=6%, signal=30%
GSE27786_BCELL_VS_NEUTROPHIL_UP	GSE27786_BCELL_VS_NEUTROPHIL_UP		193	-0.434159	-1.6962	0	0.0121512	1	4943	tags=40%, list=16%, signal=48%
GSE11961_MARGINAL_ZONE_BCELL_VS_MEMORY_BCELL_DAY40_DN	GSE11961_MARGINAL_ZONE_BCELL_VS_MEMORY_BCELL_DAY40_DN		176	-0.438894	-1.69599	0	0.0121691	1	3887	tags=40%, list=12%, signal=46%
GROSS_HIF1A_TARGETS_DN	GROSS_HIF1A_TARGETS_DN		22	-0.626921	-1.69566	0.00835655	0.0121946	1	2358	tags=41%, list=7%, signal=44%
NEGATIVE_REGULATION_OF_DNA_REPLICATION	NEGATIVE_REGULATION_OF_DNA_REPLICATION		12	-0.750184	-1.69489	0.00536193	0.0122983	1	2584	tags=58%, list=8%, signal=64%
NAKAMURA_CANCER_MICROENVIRONMENT_DN	NAKAMURA_CANCER_MICROENVIRONMENT_DN		44	-0.546244	-1.69451	0	0.0123227	1	4470	tags=68%, list=14%, signal=79%
INTRACELLULAR_ORGANELLE_PART	INTRACELLULAR_ORGANELLE_PART		1123	-0.3901	-1.69398	0	0.0124125	1	5605	tags=41%, list=18%, signal=48%
WELCH_GATA1_TARGETS	WELCH_GATA1_TARGETS		17	-0.670617	-1.69389	0.00516796	0.0124143	1	4738	tags=59%, list=15%, signal=69%
HALLMARK_CHOLESTEROL_HOMEOSTASIS	HALLMARK_CHOLESTEROL_HOMEOSTASIS		72	-0.495409	-1.69337	0	0.0124628	1	2377	tags=35%, list=8%, signal=37%
HUMMERICH_MALIGNANT_SKIN_TUMOR_UP	HUMMERICH_MALIGNANT_SKIN_TUMOR_UP		13	-0.730174	-1.69313	0.00257732	0.0124822	1	5332	tags=62%, list=17%, signal=74%
V$E2F_03	V$E2F_03		228	-0.425662	-1.69213	0	0.0126182	1	4125	tags=39%, list=13%, signal=44%
ALFANO_MYC_TARGETS	ALFANO_MYC_TARGETS		227	-0.420944	-1.69186	0	0.0126496	1	3066	tags=34%, list=10%, signal=37%
GSE40225_WT_VS_RIP_B7X_DIABETIC_MOUSE_PANCREATIC_CD8_TCELL_DN	GSE40225_WT_VS_RIP_B7X_DIABETIC_MOUSE_PANCREATIC_CD8_TCELL_DN		187	-0.430887	-1.69179	0	0.0126446	1	3942	tags=41%, list=13%, signal=46%
ORGANELLE_PART	ORGANELLE_PART		1128	-0.386663	-1.6917	0	0.0126461	1	5605	tags=41%, list=18%, signal=48%
GSE41867_NAIVE_VS_DAY15_LCMV_EFFECTOR_CD8_TCELL_UP	GSE41867_NAIVE_VS_DAY15_LCMV_EFFECTOR_CD8_TCELL_UP		186	-0.441369	-1.69157	0	0.0126543	1	4967	tags=43%, list=16%, signal=51%
BENPORATH_CYCLING_GENES	BENPORATH_CYCLING_GENES		618	-0.390628	-1.69138	0	0.0126713	1	4706	tags=42%, list=15%, signal=48%
GSE23114_WT_VS_SLE2C1_MOUSE_SPLEEN_B1A_BCELL_UP	GSE23114_WT_VS_SLE2C1_MOUSE_SPLEEN_B1A_BCELL_UP		190	-0.435488	-1.69111	0	0.0126918	1	4047	tags=41%, list=13%, signal=47%
KEGG_BIOSYNTHESIS_OF_UNSATURATED_FATTY_ACIDS	KEGG_BIOSYNTHESIS_OF_UNSATURATED_FATTY_ACIDS		22	-0.624665	-1.69105	0.00265252	0.0126856	1	5495	tags=64%, list=17%, signal=77%
DNA_RECOMBINATION	DNA_RECOMBINATION		45	-0.539557	-1.69091	0	0.0126961	1	5328	tags=53%, list=17%, signal=64%
GSE32986_UNSTIM_VS_GMCSF_AND_CURDLAN_HIGHDOSE_STIM_DC_UP	GSE32986_UNSTIM_VS_GMCSF_AND_CURDLAN_HIGHDOSE_STIM_DC_UP		187	-0.434554	-1.69045	0	0.0127406	1	4186	tags=41%, list=13%, signal=47%
GSE27786_CD8_TCELL_VS_NEUTROPHIL_UP	GSE27786_CD8_TCELL_VS_NEUTROPHIL_UP		187	-0.438133	-1.69033	0	0.0127432	1	4148	tags=39%, list=13%, signal=45%
LEE_LIVER_CANCER_MYC_E2F1_DN	LEE_LIVER_CANCER_MYC_E2F1_DN		57	-0.517931	-1.6899	0	0.0127833	1	4874	tags=35%, list=15%, signal=41%
GSE23502_WT_VS_HDC_KO_MYELOID_DERIVED_SUPPRESSOR_CELL_COLON_TUMOR_UP	GSE23502_WT_VS_HDC_KO_MYELOID_DERIVED_SUPPRESSOR_CELL_COLON_TUMOR_UP		183	-0.441098	-1.68933	0	0.0128528	1	4741	tags=43%, list=15%, signal=50%
GSE28726_NAIVE_VS_ACTIVATED_NKTCELL_DN	GSE28726_NAIVE_VS_ACTIVATED_NKTCELL_DN		187	-0.439373	-1.68913	0	0.0128683	1	4028	tags=36%, list=13%, signal=41%
TRNA_PROCESSING	TRNA_PROCESSING		10	-0.766525	-1.68859	0.0214797	0.0129444	1	3959	tags=60%, list=13%, signal=69%
CONDENSED_CHROMOSOME	CONDENSED_CHROMOSOME		33	-0.589551	-1.68842	0.00576369	0.0129566	1	3269	tags=48%, list=10%, signal=54%
GSE17721_LPS_VS_CPG_1H_BMDM_UP	GSE17721_LPS_VS_CPG_1H_BMDM_UP		182	-0.435112	-1.68761	0	0.0130607	1	4545	tags=35%, list=14%, signal=41%
GSE411_WT_VS_SOCS3_KO_MACROPHAGE_IL6_STIM_100MIN_UP	GSE411_WT_VS_SOCS3_KO_MACROPHAGE_IL6_STIM_100MIN_UP		188	-0.437699	-1.68746	0	0.0130662	1	4394	tags=41%, list=14%, signal=48%
S_PHASE_OF_MITOTIC_CELL_CYCLE	S_PHASE_OF_MITOTIC_CELL_CYCLE		10	-0.785327	-1.68656	0.00652174	0.0131897	1	1946	tags=40%, list=6%, signal=43%
REACTOME_ASSOCIATION_OF_LICENSING_FACTORS_WITH_THE_PRE_REPLICATIVE_COMPLEX	REACTOME_ASSOCIATION_OF_LICENSING_FACTORS_WITH_THE_PRE_REPLICATIVE_COMPLEX		13	-0.725826	-1.68592	0.0121655	0.0132767	1	3017	tags=46%, list=10%, signal=51%
GSE19941_IL10_KO_VS_IL10_KO_AND_NFKBP50_KO_LPS_AND_IL10_STIM_MACROPHAGE_DN	GSE19941_IL10_KO_VS_IL10_KO_AND_NFKBP50_KO_LPS_AND_IL10_STIM_MACROPHAGE_DN		160	-0.441222	-1.68589	0	0.0132657	1	5299	tags=44%, list=17%, signal=53%
WANG_TUMOR_INVASIVENESS_UP	WANG_TUMOR_INVASIVENESS_UP		353	-0.40846	-1.68514	0	0.0133549	1	4941	tags=39%, list=16%, signal=46%
MOOTHA_PGC	MOOTHA_PGC		396	-0.402639	-1.68503	0	0.013357	1	4088	tags=37%, list=13%, signal=42%
GSE20727_CTRL_VS_ROS_INHIBITOR_TREATED_DC_UP	GSE20727_CTRL_VS_ROS_INHIBITOR_TREATED_DC_UP		186	-0.433704	-1.68382	0	0.013518	1	4222	tags=39%, list=13%, signal=44%
GSE5589_LPS_VS_LPS_AND_IL6_STIM_IL10_KO_MACROPHAGE_45MIN_DN	GSE5589_LPS_VS_LPS_AND_IL6_STIM_IL10_KO_MACROPHAGE_45MIN_DN		188	-0.428863	-1.68353	0	0.0135393	1	3304	tags=30%, list=11%, signal=33%
GSE26343_UNSTIM_VS_LPS_STIM_NFAT5_KO_MACROPHAGE_UP	GSE26343_UNSTIM_VS_LPS_STIM_NFAT5_KO_MACROPHAGE_UP		187	-0.432156	-1.68289	0	0.013604	1	3798	tags=40%, list=12%, signal=45%
GSE45365_HEALTHY_VS_MCMV_INFECTION_CD11B_DC_IFNAR_KO_DN	GSE45365_HEALTHY_VS_MCMV_INFECTION_CD11B_DC_IFNAR_KO_DN		161	-0.438747	-1.68192	0	0.0137423	1	3405	tags=35%, list=11%, signal=39%
GSE2770_IL12_AND_TGFB_ACT_VS_ACT_CD4_TCELL_6H_DN	GSE2770_IL12_AND_TGFB_ACT_VS_ACT_CD4_TCELL_6H_DN		187	-0.432171	-1.68188	0	0.0137342	1	4127	tags=40%, list=13%, signal=45%
GSE45365_WT_VS_IFNAR_KO_BCELL_DN	GSE45365_WT_VS_IFNAR_KO_BCELL_DN		152	-0.441907	-1.68151	0	0.0137769	1	4652	tags=41%, list=15%, signal=48%
GSE27786_BCELL_VS_MONO_MAC_UP	GSE27786_BCELL_VS_MONO_MAC_UP		188	-0.42817	-1.68121	0	0.0137969	1	4935	tags=40%, list=16%, signal=47%
GSE20366_EX_VIVO_VS_HOMEOSTATIC_CONVERSION_TREG_DN	GSE20366_EX_VIVO_VS_HOMEOSTATIC_CONVERSION_TREG_DN		186	-0.432599	-1.68079	0	0.0138341	1	4372	tags=38%, list=14%, signal=43%
GSE40274_CTRL_VS_LEF1_TRANSDUCED_ACTIVATED_CD4_TCELL_DN	GSE40274_CTRL_VS_LEF1_TRANSDUCED_ACTIVATED_CD4_TCELL_DN		161	-0.442575	-1.68064	0	0.0138367	1	5121	tags=43%, list=16%, signal=51%
PELLICCIOTTA_HDAC_IN_ANTIGEN_PRESENTATION_DN	PELLICCIOTTA_HDAC_IN_ANTIGEN_PRESENTATION_DN		49	-0.532321	-1.68025	0.0031348	0.0138791	1	5560	tags=55%, list=18%, signal=67%
GSE27786_LSK_VS_NKTCELL_UP	GSE27786_LSK_VS_NKTCELL_UP		184	-0.434254	-1.67993	0	0.0139075	1	3039	tags=34%, list=10%, signal=38%
GSE40274_CTRL_VS_FOXP3_AND_HELIOS_TRANSDUCED_ACTIVATED_CD4_TCELL_DN	GSE40274_CTRL_VS_FOXP3_AND_HELIOS_TRANSDUCED_ACTIVATED_CD4_TCELL_DN		185	-0.437727	-1.67954	0	0.0139575	1	4496	tags=41%, list=14%, signal=48%
AMIT_EGF_RESPONSE_480_MCF10A	AMIT_EGF_RESPONSE_480_MCF10A		38	-0.537485	-1.67942	0	0.0139686	1	1986	tags=26%, list=6%, signal=28%
GRADE_COLON_CANCER_UP	GRADE_COLON_CANCER_UP		815	-0.382732	-1.67915	0	0.0139819	1	4779	tags=36%, list=15%, signal=41%
RB_P130_DN.V1_UP	RB_P130_DN.V1_UP		116	-0.460592	-1.67808	0	0.0141398	1	3547	tags=36%, list=11%, signal=41%
GSE18791_CTRL_VS_NEWCASTLE_VIRUS_DC_18H_UP	GSE18791_CTRL_VS_NEWCASTLE_VIRUS_DC_18H_UP		183	-0.437541	-1.67778	0	0.014168	1	5019	tags=47%, list=16%, signal=56%
GSE27786_LSK_VS_LIN_NEG_CELL_DN	GSE27786_LSK_VS_LIN_NEG_CELL_DN		188	-0.435341	-1.67764	0	0.0141756	1	5132	tags=43%, list=16%, signal=51%
CHR20P11	CHR20P11		49	-0.525432	-1.67706	0	0.0142516	1	4065	tags=37%, list=13%, signal=42%
REACTOME_METABOLISM_OF_VITAMINS_AND_COFACTORS	REACTOME_METABOLISM_OF_VITAMINS_AND_COFACTORS		48	-0.535872	-1.67662	0	0.0143064	1	4422	tags=48%, list=14%, signal=56%
V$E2F_Q3_01	V$E2F_Q3_01		219	-0.424866	-1.67604	0	0.0143639	1	4567	tags=38%, list=15%, signal=45%
FATTY_ACID_BIOSYNTHETIC_PROCESS	FATTY_ACID_BIOSYNTHETIC_PROCESS		13	-0.713885	-1.67579	0.0151133	0.0143969	1	1842	tags=38%, list=6%, signal=41%
GSE9006_TYPE_1_VS_TYPE_2_DIABETES_PBMC_AT_DX_UP	GSE9006_TYPE_1_VS_TYPE_2_DIABETES_PBMC_AT_DX_UP		190	-0.426989	-1.6756	0	0.0144065	1	4254	tags=38%, list=14%, signal=44%
NUCLEAR_MEMBRANE	NUCLEAR_MEMBRANE		48	-0.537207	-1.6752	0	0.014448	1	5659	tags=56%, list=18%, signal=68%
SITE_OF_POLARIZED_GROWTH	SITE_OF_POLARIZED_GROWTH		11	-0.743027	-1.67507	0.0145278	0.0144584	1	3699	tags=45%, list=12%, signal=51%
GSE18791_UNSTIM_VS_NEWCATSLE_VIRUS_DC_18H_UP	GSE18791_UNSTIM_VS_NEWCATSLE_VIRUS_DC_18H_UP		186	-0.438533	-1.67441	0	0.0145552	1	3161	tags=37%, list=10%, signal=40%
REACTOME_E2F_ENABLED_INHIBITION_OF_PRE_REPLICATION_COMPLEX_FORMATION	REACTOME_E2F_ENABLED_INHIBITION_OF_PRE_REPLICATION_COMPLEX_FORMATION		10	-0.776588	-1.67422	0.00233645	0.0145678	1	3017	tags=60%, list=10%, signal=66%
KEGG_PURINE_METABOLISM	KEGG_PURINE_METABOLISM		147	-0.442642	-1.67421	0	0.0145558	1	3870	tags=37%, list=12%, signal=42%
MODULE_22	MODULE_22		45	-0.53636	-1.67419	0	0.014544	1	4034	tags=44%, list=13%, signal=51%
GSE17721_POLYIC_VS_PAM3CSK4_8H_BMDM_DN	GSE17721_POLYIC_VS_PAM3CSK4_8H_BMDM_DN		188	-0.437582	-1.67402	0	0.0145502	1	3870	tags=37%, list=12%, signal=42%
CHROMOSOMAL_PART	CHROMOSOMAL_PART		90	-0.488221	-1.67398	0.00374532	0.0145416	1	4610	tags=46%, list=15%, signal=53%
SMID_BREAST_CANCER_BASAL_UP	SMID_BREAST_CANCER_BASAL_UP		546	-0.387173	-1.67144	0	0.0148766	1	4080	tags=32%, list=13%, signal=36%
GSE17721_CTRL_VS_GARDIQUIMOD_24H_BMDM_DN	GSE17721_CTRL_VS_GARDIQUIMOD_24H_BMDM_DN		188	-0.428536	-1.67111	0	0.0149119	1	5175	tags=39%, list=16%, signal=47%
OXIDOREDUCTASE_ACTIVITY_GO_0016616	OXIDOREDUCTASE_ACTIVITY_GO_0016616		50	-0.525466	-1.67042	0.00285714	0.0150063	1	4942	tags=42%, list=16%, signal=50%
BIOCARTA_RANMS_PATHWAY	BIOCARTA_RANMS_PATHWAY		10	-0.780687	-1.66963	0.0165094	0.0151091	1	2742	tags=80%, list=9%, signal=88%
ABRAMSON_INTERACT_WITH_AIRE	ABRAMSON_INTERACT_WITH_AIRE		44	-0.536142	-1.66915	0	0.0151611	1	4567	tags=70%, list=15%, signal=82%
GSE3039_ALPHABETA_CD8_TCELL_VS_B1_BCELL_DN	GSE3039_ALPHABETA_CD8_TCELL_VS_B1_BCELL_DN		188	-0.432148	-1.66914	0	0.0151498	1	4779	tags=40%, list=15%, signal=47%
TRANSFERASE_ACTIVITY_TRANSFERRING_ONE_CARBON_GROUPS	TRANSFERASE_ACTIVITY_TRANSFERRING_ONE_CARBON_GROUPS		33	-0.570364	-1.66895	0	0.0151627	1	1948	tags=27%, list=6%, signal=29%
REACTOME_METABOLISM_OF_RNA	REACTOME_METABOLISM_OF_RNA		268	-0.420221	-1.66893	0	0.0151504	1	5603	tags=41%, list=18%, signal=50%
GSE27786_LSK_VS_MONO_MAC_UP	GSE27786_LSK_VS_MONO_MAC_UP		183	-0.428095	-1.66828	0	0.0152369	1	4181	tags=37%, list=13%, signal=42%
GSE17721_0.5H_VS_8H_LPS_BMDM_UP	GSE17721_0.5H_VS_8H_LPS_BMDM_UP		184	-0.424805	-1.66802	0	0.0152677	1	4672	tags=44%, list=15%, signal=51%
SUNG_METASTASIS_STROMA_DN	SUNG_METASTASIS_STROMA_DN		50	-0.524845	-1.66773	0.0103448	0.0153016	1	2814	tags=44%, list=9%, signal=48%
CELLULAR_RESPONSE_TO_STIMULUS	CELLULAR_RESPONSE_TO_STIMULUS		18	-0.656602	-1.6677	0.0203562	0.0152892	1	3429	tags=44%, list=11%, signal=50%
YAGI_AML_RELAPSE_PROGNOSIS	YAGI_AML_RELAPSE_PROGNOSIS		34	-0.57484	-1.66762	0.00558659	0.0152915	1	3862	tags=53%, list=12%, signal=60%
GSE27291_0H_VS_6H_STIM_GAMMADELTA_TCELL_DN	GSE27291_0H_VS_6H_STIM_GAMMADELTA_TCELL_DN		157	-0.439703	-1.66761	0	0.0152802	1	4497	tags=39%, list=14%, signal=45%
MOHANKUMAR_TLX1_TARGETS_UP	MOHANKUMAR_TLX1_TARGETS_UP		392	-0.399073	-1.66707	0	0.0153483	1	4653	tags=36%, list=15%, signal=42%
GSE39820_TGFBETA1_VS_TGFBETA3_IN_IL6_IL23A_TREATED_CD4_TCELL_UP	GSE39820_TGFBETA1_VS_TGFBETA3_IN_IL6_IL23A_TREATED_CD4_TCELL_UP		180	-0.426023	-1.66572	0	0.0155425	1	4811	tags=39%, list=15%, signal=46%
REACTOME_ACTIVATION_OF_GENES_BY_ATF4	REACTOME_ACTIVATION_OF_GENES_BY_ATF4		25	-0.611122	-1.66523	0.0132626	0.0155957	1	5111	tags=48%, list=16%, signal=57%
GSE22886_NAIVE_CD4_TCELL_VS_12H_ACT_TH2_DN	GSE22886_NAIVE_CD4_TCELL_VS_12H_ACT_TH2_DN		195	-0.431884	-1.66504	0	0.015605	1	5159	tags=46%, list=16%, signal=55%
MODULE_102	MODULE_102		17	-0.662694	-1.66494	0.0179949	0.0156134	1	3224	tags=76%, list=10%, signal=85%
GSE10240_CTRL_VS_IL17_AND_IL22_STIM_PRIMARY_BRONCHIAL_EPITHELIAL_CELLS_UP	GSE10240_CTRL_VS_IL17_AND_IL22_STIM_PRIMARY_BRONCHIAL_EPITHELIAL_CELLS_UP		185	-0.436588	-1.66347	0	0.0158077	1	4924	tags=43%, list=16%, signal=51%
GSE13493_DP_VS_CD4INTCD8POS_THYMOCYTE_DN	GSE13493_DP_VS_CD4INTCD8POS_THYMOCYTE_DN		180	-0.43042	-1.66338	0	0.0158043	1	3946	tags=34%, list=13%, signal=39%
GSE32164_ALTERNATIVELY_ACT_M2_VS_CMYC_INHIBITED_MACROPHAGE_DN	GSE32164_ALTERNATIVELY_ACT_M2_VS_CMYC_INHIBITED_MACROPHAGE_DN		183	-0.432066	-1.6633	0	0.015805	1	4060	tags=42%, list=13%, signal=47%
GSE5589_LPS_VS_LPS_AND_IL6_STIM_MACROPHAGE_45MIN_DN	GSE5589_LPS_VS_LPS_AND_IL6_STIM_MACROPHAGE_45MIN_DN		189	-0.428232	-1.66323	0	0.0158007	1	4146	tags=40%, list=13%, signal=45%
WU_APOPTOSIS_BY_CDKN1A_NOT_VIA_TP53	WU_APOPTOSIS_BY_CDKN1A_NOT_VIA_TP53		10	-0.756286	-1.66308	0.0118483	0.0158139	1	3795	tags=70%, list=12%, signal=80%
GSE17721_LPS_VS_PAM3CSK4_6H_BMDM_DN	GSE17721_LPS_VS_PAM3CSK4_6H_BMDM_DN		191	-0.425401	-1.66149	0	0.0160511	1	4806	tags=45%, list=15%, signal=52%
YAO_TEMPORAL_RESPONSE_TO_PROGESTERONE_CLUSTER_10	YAO_TEMPORAL_RESPONSE_TO_PROGESTERONE_CLUSTER_10		64	-0.491971	-1.66138	0	0.0160537	1	5592	tags=52%, list=18%, signal=63%
RNA_HELICASE_ACTIVITY	RNA_HELICASE_ACTIVITY		24	-0.621046	-1.66135	0.0132626	0.016046	1	4688	tags=50%, list=15%, signal=59%
GSE3982_MAST_CELL_VS_NEUTROPHIL_UP	GSE3982_MAST_CELL_VS_NEUTROPHIL_UP		190	-0.425706	-1.66104	0	0.0161005	1	4481	tags=37%, list=14%, signal=43%
GSE14000_UNSTIM_VS_4H_LPS_DC_UP	GSE14000_UNSTIM_VS_4H_LPS_DC_UP		187	-0.433903	-1.6606	0	0.0161555	1	4010	tags=40%, list=13%, signal=45%
GSE27786_LIN_NEG_VS_CD8_TCELL_UP	GSE27786_LIN_NEG_VS_CD8_TCELL_UP		184	-0.427407	-1.66014	0	0.0162003	1	4220	tags=41%, list=13%, signal=47%
MODULE_505	MODULE_505		13	-0.699118	-1.65963	0.00771208	0.0162882	1	4220	tags=31%, list=13%, signal=36%
MODULE_62	MODULE_62		87	-0.482923	-1.65945	0	0.0163093	1	4990	tags=43%, list=16%, signal=50%
GSE41867_DAY8_VS_DAY15_LCMV_CLONE13_EFFECTOR_CD8_TCELL_DN	GSE41867_DAY8_VS_DAY15_LCMV_CLONE13_EFFECTOR_CD8_TCELL_DN		188	-0.429924	-1.65934	0	0.0163086	1	5458	tags=48%, list=17%, signal=58%
GSE41867_DAY6_EFFECTOR_VS_DAY30_EXHAUSTED_CD8_TCELL_LCMV_CLONE13_DN	GSE41867_DAY6_EFFECTOR_VS_DAY30_EXHAUSTED_CD8_TCELL_LCMV_CLONE13_DN		187	-0.42463	-1.65916	0	0.0163254	1	4024	tags=36%, list=13%, signal=41%
REACTOME_METAL_ION_SLC_TRANSPORTERS	REACTOME_METAL_ION_SLC_TRANSPORTERS		21	-0.641399	-1.65906	0.0124688	0.0163267	1	1494	tags=29%, list=5%, signal=30%
MODULE_197	MODULE_197		160	-0.432158	-1.65897	0	0.0163312	1	4017	tags=39%, list=13%, signal=45%
REACTOME_PROCESSING_OF_INTRONLESS_PRE_MRNAS	REACTOME_PROCESSING_OF_INTRONLESS_PRE_MRNAS		14	-0.711548	-1.65829	0.00970874	0.0164312	1	6055	tags=71%, list=19%, signal=88%
GSE16522_ANTI_CD3CD28_STIM_VS_UNSTIM_NAIVE_CD8_TCELL_UP	GSE16522_ANTI_CD3CD28_STIM_VS_UNSTIM_NAIVE_CD8_TCELL_UP		175	-0.431283	-1.658	0	0.01646	1	4202	tags=35%, list=13%, signal=41%
KEGG_HISTIDINE_METABOLISM	KEGG_HISTIDINE_METABOLISM		25	-0.59681	-1.65779	0.00555556	0.0164744	1	2522	tags=36%, list=8%, signal=39%
KEGG_RENIN_ANGIOTENSIN_SYSTEM	KEGG_RENIN_ANGIOTENSIN_SYSTEM		13	-0.706248	-1.65712	0.0100756	0.0165715	1	1015	tags=31%, list=3%, signal=32%
GSE14908_RESTING_VS_HDM_STIM_CD4_TCELL_ATOPIC_PATIENT_UP	GSE14908_RESTING_VS_HDM_STIM_CD4_TCELL_ATOPIC_PATIENT_UP		185	-0.428677	-1.65655	0	0.0166555	1	5383	tags=45%, list=17%, signal=54%
GSE14350_TREG_VS_TEFF_IN_IL2RB_KO_DN	GSE14350_TREG_VS_TEFF_IN_IL2RB_KO_DN		168	-0.436606	-1.65619	0	0.0166995	1	3528	tags=33%, list=11%, signal=37%
GSE22103_UNSTIM_VS_GMCSF_AND_IFNG_STIM_NEUTROPHIL_DN	GSE22103_UNSTIM_VS_GMCSF_AND_IFNG_STIM_NEUTROPHIL_DN		191	-0.426444	-1.65601	0	0.0167148	1	3591	tags=39%, list=11%, signal=44%
GSE360_L_DONOVANI_VS_T_GONDII_DC_DN	GSE360_L_DONOVANI_VS_T_GONDII_DC_DN		167	-0.430033	-1.65599	0	0.0167036	1	4600	tags=39%, list=15%, signal=45%
MODULE_32	MODULE_32		236	-0.415015	-1.65481	0	0.0168787	1	5032	tags=39%, list=16%, signal=46%
GSE15930_STIM_VS_STIM_AND_IFNAB_72H_CD8_T_CELL_DN	GSE15930_STIM_VS_STIM_AND_IFNAB_72H_CD8_T_CELL_DN		183	-0.426158	-1.65475	0	0.0168724	1	5010	tags=45%, list=16%, signal=53%
ACEVEDO_NORMAL_TISSUE_ADJACENT_TO_LIVER_TUMOR_DN	ACEVEDO_NORMAL_TISSUE_ADJACENT_TO_LIVER_TUMOR_DN		320	-0.404963	-1.65361	0	0.0170431	1	3312	tags=28%, list=11%, signal=31%
DNA_REPLICATION_INITIATION	DNA_REPLICATION_INITIATION		16	-0.675519	-1.65343	0.00779221	0.017055	1	4016	tags=56%, list=13%, signal=64%
WOOD_EBV_EBNA1_TARGETS_UP	WOOD_EBV_EBNA1_TARGETS_UP		108	-0.461176	-1.65201	0	0.0172799	1	4254	tags=41%, list=14%, signal=47%
INTRACELLULAR_NON_MEMBRANE_BOUND_ORGANELLE	INTRACELLULAR_NON_MEMBRANE_BOUND_ORGANELLE		574	-0.388665	-1.65125	0	0.0173867	1	4017	tags=33%, list=13%, signal=37%
GSE17721_0.5H_VS_24H_POLYIC_BMDM_UP	GSE17721_0.5H_VS_24H_POLYIC_BMDM_UP		176	-0.431577	-1.65123	0	0.017377	1	5133	tags=46%, list=16%, signal=55%
GSE26669_CTRL_VS_COSTIM_BLOCK_MLR_CD8_TCELL_UP	GSE26669_CTRL_VS_COSTIM_BLOCK_MLR_CD8_TCELL_UP		192	-0.425333	-1.65118	0	0.0173724	1	4556	tags=47%, list=14%, signal=55%
GSE39820_TGFBETA1_VS_TGFBETA3_IN_IL6_TREATED_CD4_TCELL_DN	GSE39820_TGFBETA1_VS_TGFBETA3_IN_IL6_TREATED_CD4_TCELL_DN		172	-0.426282	-1.65116	0	0.0173627	1	4178	tags=35%, list=13%, signal=41%
GSE45365_HEALTHY_VS_MCMV_INFECTION_BCELL_IFNAR_KO_UP	GSE45365_HEALTHY_VS_MCMV_INFECTION_BCELL_IFNAR_KO_UP		185	-0.429471	-1.64729	0	0.0180078	1	2640	tags=30%, list=8%, signal=33%
CONCANNON_APOPTOSIS_BY_EPOXOMICIN_DN	CONCANNON_APOPTOSIS_BY_EPOXOMICIN_DN		151	-0.432098	-1.64724	0	0.0180017	1	3579	tags=37%, list=11%, signal=42%
LOPEZ_MESOTELIOMA_SURVIVAL_TIME_UP	LOPEZ_MESOTELIOMA_SURVIVAL_TIME_UP		13	-0.725241	-1.64715	0.00966184	0.0179986	1	2887	tags=77%, list=9%, signal=85%
MOOTHA_TCA	MOOTHA_TCA		16	-0.667092	-1.64706	0.0129199	0.0179965	1	3134	tags=50%, list=10%, signal=56%
GSE12845_NAIVE_VS_DARKZONE_GC_TONSIL_BCELL_DN	GSE12845_NAIVE_VS_DARKZONE_GC_TONSIL_BCELL_DN		186	-0.424001	-1.64699	0	0.0179965	1	4870	tags=40%, list=15%, signal=47%
MOOTHA_GLYCOLYSIS	MOOTHA_GLYCOLYSIS		17	-0.664201	-1.64677	0.0100756	0.0180195	1	2127	tags=47%, list=7%, signal=50%
GSE3337_4H_VS_16H_IFNG_IN_CD8POS_DC_UP	GSE3337_4H_VS_16H_IFNG_IN_CD8POS_DC_UP		189	-0.419886	-1.6461	0	0.0181177	1	4218	tags=44%, list=13%, signal=51%
GSE4142_PLASMA_CELL_VS_GC_BCELL_DN	GSE4142_PLASMA_CELL_VS_GC_BCELL_DN		178	-0.425948	-1.64473	0	0.0183496	1	4713	tags=43%, list=15%, signal=51%
MODULE_52	MODULE_52		394	-0.397322	-1.64438	0	0.0184043	1	3614	tags=36%, list=11%, signal=40%
REACTOME_RNA_POL_III_TRANSCRIPTION	REACTOME_RNA_POL_III_TRANSCRIPTION		33	-0.556169	-1.64437	0.003003	0.0183928	1	4633	tags=45%, list=15%, signal=53%
SANSOM_APC_MYC_TARGETS	SANSOM_APC_MYC_TARGETS		200	-0.425547	-1.64432	0	0.0183834	1	4551	tags=40%, list=14%, signal=46%
GSE11973_MIR223_KOVS_WT_BONE_MARROW_NEUTROPHIL_DN	GSE11973_MIR223_KOVS_WT_BONE_MARROW_NEUTROPHIL_DN		167	-0.432455	-1.6433	0	0.0185527	1	4723	tags=41%, list=15%, signal=48%
GSE40274_CTRL_VS_FOXP3_AND_SATB1_TRANSDUCED_ACTIVATED_CD4_TCELL_UP	GSE40274_CTRL_VS_FOXP3_AND_SATB1_TRANSDUCED_ACTIVATED_CD4_TCELL_UP		155	-0.438734	-1.64293	0	0.0186105	1	4188	tags=46%, list=13%, signal=53%
PATIL_LIVER_CANCER	PATIL_LIVER_CANCER		694	-0.386021	-1.6429	0	0.018601	1	4113	tags=37%, list=13%, signal=41%
MORF_EIF3S6	MORF_EIF3S6		121	-0.454393	-1.64243	0	0.0186723	1	5695	tags=41%, list=18%, signal=50%
V$E2F1_Q4_01	V$E2F1_Q4_01		214	-0.420349	-1.64177	0	0.0187545	1	4402	tags=38%, list=14%, signal=44%
NON_MEMBRANE_BOUND_ORGANELLE	NON_MEMBRANE_BOUND_ORGANELLE		574	-0.388665	-1.64106	0	0.0188722	1	4017	tags=33%, list=13%, signal=37%
DAZARD_UV_RESPONSE_CLUSTER_G4	DAZARD_UV_RESPONSE_CLUSTER_G4		17	-0.66217	-1.64063	0.0242588	0.0189341	1	5389	tags=47%, list=17%, signal=57%
LIPID_BIOSYNTHETIC_PROCESS	LIPID_BIOSYNTHETIC_PROCESS		88	-0.470019	-1.64026	0	0.0189931	1	4127	tags=32%, list=13%, signal=37%
GSE8921_UNSTIM_VS_TLR1_2_STIM_MONOCYTE_3H_UP	GSE8921_UNSTIM_VS_TLR1_2_STIM_MONOCYTE_3H_UP		173	-0.431792	-1.63933	0	0.0191384	1	5157	tags=42%, list=16%, signal=50%
MODULE_151	MODULE_151		308	-0.40175	-1.63922	0	0.0191325	1	5953	tags=43%, list=19%, signal=53%
BHAT_ESR1_TARGETS_VIA_AKT1_UP	BHAT_ESR1_TARGETS_VIA_AKT1_UP		253	-0.408938	-1.63846	0	0.0192437	1	3602	tags=36%, list=11%, signal=41%
GSE39110_DAY3_VS_DAY6_POST_IMMUNIZATION_CD8_TCELL_WITH_IL2_TREATMENT_UP	GSE39110_DAY3_VS_DAY6_POST_IMMUNIZATION_CD8_TCELL_WITH_IL2_TREATMENT_UP		187	-0.421644	-1.63818	0	0.0192723	1	4432	tags=42%, list=14%, signal=48%
KANG_FLUOROURACIL_RESISTANCE_DN	KANG_FLUOROURACIL_RESISTANCE_DN		15	-0.661394	-1.63758	0.0198511	0.0193705	1	2648	tags=47%, list=8%, signal=51%
HALLMARK_GLYCOLYSIS	HALLMARK_GLYCOLYSIS		183	-0.417244	-1.63728	0	0.0194099	1	4010	tags=36%, list=13%, signal=40%
REACTOME_RECRUITMENT_OF_MITOTIC_CENTROSOME_PROTEINS_AND_COMPLEXES	REACTOME_RECRUITMENT_OF_MITOTIC_CENTROSOME_PROTEINS_AND_COMPLEXES		62	-0.492741	-1.63671	0	0.0195077	1	5033	tags=52%, list=16%, signal=61%
GSE20152_SPHK1_KO_VS_HTNFA_OVEREXPRESS_ANKLE_DN	GSE20152_SPHK1_KO_VS_HTNFA_OVEREXPRESS_ANKLE_DN		180	-0.424536	-1.63669	0	0.0194965	1	5434	tags=42%, list=17%, signal=51%
GSE43863_TFH_VS_LY6C_INT_CXCR5POS_EFFECTOR_CD4_TCELL_UP	GSE43863_TFH_VS_LY6C_INT_CXCR5POS_EFFECTOR_CD4_TCELL_UP		181	-0.421051	-1.63555	0	0.019694	1	3699	tags=36%, list=12%, signal=41%
GSE7460_CD8_TCELL_VS_TREG_ACT_DN	GSE7460_CD8_TCELL_VS_TREG_ACT_DN		188	-0.416817	-1.63499	0	0.0197711	1	4405	tags=44%, list=14%, signal=50%
MODULE_401	MODULE_401		13	-0.71176	-1.63424	0.015625	0.0198939	1	4514	tags=38%, list=14%, signal=45%
OUELLET_OVARIAN_CANCER_INVASIVE_VS_LMP_UP	OUELLET_OVARIAN_CANCER_INVASIVE_VS_LMP_UP		115	-0.452659	-1.63424	0	0.0198794	1	4617	tags=43%, list=15%, signal=50%
VANTVEER_BREAST_CANCER_BRCA1_UP	VANTVEER_BREAST_CANCER_BRCA1_UP		34	-0.557385	-1.63382	0.00303951	0.0199428	1	3219	tags=44%, list=10%, signal=49%
CELL_CYCLE_GO_0007049	CELL_CYCLE_GO_0007049		298	-0.39957	-1.63328	0	0.0200387	1	4857	tags=43%, list=15%, signal=50%
GSE3982_NEUTROPHIL_VS_TH2_DN	GSE3982_NEUTROPHIL_VS_TH2_DN		191	-0.415615	-1.6326	0	0.0201595	1	5013	tags=47%, list=16%, signal=56%
STEIN_ESRRA_TARGETS_UP	STEIN_ESRRA_TARGETS_UP		360	-0.405515	-1.63211	0	0.020243	1	4063	tags=37%, list=13%, signal=42%
GSE3982_DC_VS_TH1_DN	GSE3982_DC_VS_TH1_DN		190	-0.421843	-1.632	0	0.020244	1	4741	tags=43%, list=15%, signal=50%
GSE32986_UNSTIM_VS_GMCSF_STIM_DC_DN	GSE32986_UNSTIM_VS_GMCSF_STIM_DC_DN		182	-0.419983	-1.63193	0	0.020241	1	4202	tags=39%, list=13%, signal=45%
LY_AGING_PREMATURE_DN	LY_AGING_PREMATURE_DN		30	-0.576018	-1.63189	0.0147493	0.0202302	1	5344	tags=67%, list=17%, signal=80%
GCM_CSNK2B	GCM_CSNK2B		99	-0.458726	-1.63127	0	0.0203423	1	5340	tags=41%, list=17%, signal=50%
STEROID_METABOLIC_PROCESS	STEROID_METABOLIC_PROCESS		59	-0.493689	-1.63126	0.00334448	0.0203276	1	3438	tags=27%, list=11%, signal=30%
SHEPARD_CRUSH_AND_BURN_MUTANT_UP	SHEPARD_CRUSH_AND_BURN_MUTANT_UP		181	-0.415812	-1.63074	0	0.020399	1	3084	tags=39%, list=10%, signal=43%
GSE13485_DAY1_VS_DAY21_YF17D_VACCINE_PBMC_DN	GSE13485_DAY1_VS_DAY21_YF17D_VACCINE_PBMC_DN		177	-0.427923	-1.62993	0	0.0205326	1	5566	tags=46%, list=18%, signal=55%
MACROMOLECULAR_COMPLEX	MACROMOLECULAR_COMPLEX		891	-0.372749	-1.62981	0	0.0205363	1	4940	tags=34%, list=16%, signal=40%
GSE7400_CTRL_VS_CSF3_IN_VIVO_TREATED_PBMC_UP	GSE7400_CTRL_VS_CSF3_IN_VIVO_TREATED_PBMC_UP		191	-0.422312	-1.62947	0	0.0205916	1	5289	tags=46%, list=17%, signal=55%
GCM_PFN1	GCM_PFN1		51	-0.507491	-1.62904	0.00986842	0.0206557	1	5183	tags=43%, list=16%, signal=52%
LEE_LIVER_CANCER_MYC_UP	LEE_LIVER_CANCER_MYC_UP		51	-0.50586	-1.62856	0.00321543	0.0207294	1	3007	tags=29%, list=10%, signal=32%
REACTOME_PROTEIN_FOLDING	REACTOME_PROTEIN_FOLDING		49	-0.508727	-1.62821	0.00294118	0.0207803	1	5470	tags=51%, list=17%, signal=62%
GSE17974_0.5H_VS_72H_IL4_AND_ANTI_IL12_ACT_CD4_TCELL_DN	GSE17974_0.5H_VS_72H_IL4_AND_ANTI_IL12_ACT_CD4_TCELL_DN		182	-0.419801	-1.62817	0	0.0207732	1	4336	tags=43%, list=14%, signal=50%
RAMASWAMY_METASTASIS_UP	RAMASWAMY_METASTASIS_UP		61	-0.493511	-1.62808	0	0.0207746	1	5085	tags=51%, list=16%, signal=61%
REACTOME_METABOLISM_OF_NUCLEOTIDES	REACTOME_METABOLISM_OF_NUCLEOTIDES		68	-0.477501	-1.62759	0.00346021	0.0208615	1	3280	tags=41%, list=10%, signal=46%
AROMATIC_COMPOUND_METABOLIC_PROCESS	AROMATIC_COMPOUND_METABOLIC_PROCESS		22	-0.614057	-1.62729	0.0177215	0.0209057	1	1575	tags=41%, list=5%, signal=43%
DUNNE_TARGETS_OF_AML1_MTG8_FUSION_UP	DUNNE_TARGETS_OF_AML1_MTG8_FUSION_UP		50	-0.515092	-1.62679	0.00634921	0.0209897	1	1957	tags=32%, list=6%, signal=34%
NEGATIVE_REGULATION_OF_DNA_METABOLIC_PROCESS	NEGATIVE_REGULATION_OF_DNA_METABOLIC_PROCESS		17	-0.646726	-1.62542	0.015	0.0212455	1	2584	tags=47%, list=8%, signal=51%
GSE37301_LYMPHOID_PRIMED_MPP_VS_GRAN_MONO_PROGENITOR_UP	GSE37301_LYMPHOID_PRIMED_MPP_VS_GRAN_MONO_PROGENITOR_UP		187	-0.416191	-1.6252	0	0.0212601	1	4690	tags=44%, list=15%, signal=51%
GSE411_WT_VS_SOCS3_KO_MACROPHAGE_UP	GSE411_WT_VS_SOCS3_KO_MACROPHAGE_UP		191	-0.420536	-1.62506	0	0.0212767	1	4755	tags=45%, list=15%, signal=52%
MODULE_105	MODULE_105		188	-0.42558	-1.62481	0	0.0213107	1	3399	tags=33%, list=11%, signal=37%
NUCLEUS	NUCLEUS		1347	-0.361273	-1.6242	0	0.0213939	1	4578	tags=34%, list=15%, signal=38%
KINETOCHORE	KINETOCHORE		23	-0.620728	-1.62406	0.00779221	0.0213978	1	4017	tags=48%, list=13%, signal=55%
HOLLEMAN_DAUNORUBICIN_B_ALL_UP	HOLLEMAN_DAUNORUBICIN_B_ALL_UP		10	-0.733399	-1.62355	0.0164319	0.0214933	1	3735	tags=60%, list=12%, signal=68%
GSE11961_FOLLICULAR_BCELL_VS_PLASMA_CELL_DAY7_UP	GSE11961_FOLLICULAR_BCELL_VS_PLASMA_CELL_DAY7_UP		171	-0.416434	-1.62326	0	0.021532	1	4441	tags=35%, list=14%, signal=41%
OXFORD_RALA_AND_RALB_TARGETS_UP	OXFORD_RALA_AND_RALB_TARGETS_UP		10	-0.732571	-1.62318	0.0296128	0.021527	1	4390	tags=70%, list=14%, signal=81%
GSE17721_POLYIC_VS_GARDIQUIMOD_16H_BMDM_DN	GSE17721_POLYIC_VS_GARDIQUIMOD_16H_BMDM_DN		182	-0.422159	-1.62283	0	0.0215828	1	5378	tags=41%, list=17%, signal=49%
GSE9239_CTRL_VS_TNF_INHIBITOR_TREATED_DC_DN	GSE9239_CTRL_VS_TNF_INHIBITOR_TREATED_DC_DN		188	-0.42379	-1.62078	0	0.0219844	1	4748	tags=43%, list=15%, signal=50%
MODULE_392	MODULE_392		18	-0.649714	-1.6207	0.0205656	0.0219773	1	4086	tags=72%, list=13%, signal=83%
GSE33425_CD161_HIGH_VS_INT_CD8_TCELL_DN	GSE33425_CD161_HIGH_VS_INT_CD8_TCELL_DN		190	-0.417774	-1.62063	0	0.0219788	1	2932	tags=33%, list=9%, signal=36%
REACTOME_SYNTHESIS_OF_SUBSTRATES_IN_N_GLYCAN_BIOSYTHESIS	REACTOME_SYNTHESIS_OF_SUBSTRATES_IN_N_GLYCAN_BIOSYTHESIS		14	-0.687064	-1.61922	0.0175879	0.0222581	1	5270	tags=57%, list=17%, signal=69%
RODRIGUES_THYROID_CARCINOMA_ANAPLASTIC_UP	RODRIGUES_THYROID_CARCINOMA_ANAPLASTIC_UP		682	-0.375852	-1.61909	0	0.0222671	1	5140	tags=41%, list=16%, signal=48%
MODULE_114	MODULE_114		328	-0.394893	-1.61887	0	0.0223018	1	6040	tags=43%, list=19%, signal=53%
REACTOME_CYCLIN_A_B1_ASSOCIATED_EVENTS_DURING_G2_M_TRANSITION	REACTOME_CYCLIN_A_B1_ASSOCIATED_EVENTS_DURING_G2_M_TRANSITION		15	-0.667042	-1.61884	0.0115741	0.0222897	1	3785	tags=60%, list=12%, signal=68%
REACTOME_ACTIVATION_OF_CHAPERONE_GENES_BY_ATF6_ALPHA	REACTOME_ACTIVATION_OF_CHAPERONE_GENES_BY_ATF6_ALPHA		10	-0.746941	-1.61743	0.0193705	0.022559	1	3352	tags=50%, list=11%, signal=56%
GSE2405_HEAT_KILLED_LYSATE_VS_LIVE_A_PHAGOCYTOPHILUM_STIM_NEUTROPHIL_24H_DN	GSE2405_HEAT_KILLED_LYSATE_VS_LIVE_A_PHAGOCYTOPHILUM_STIM_NEUTROPHIL_24H_DN		190	-0.418683	-1.61739	0	0.0225514	1	4991	tags=37%, list=16%, signal=44%
GSE21670_STAT3_KO_VS_WT_CD4_TCELL_TGFB_TREATED_DN	GSE21670_STAT3_KO_VS_WT_CD4_TCELL_TGFB_TREATED_DN		169	-0.416836	-1.61736	0	0.0225372	1	3584	tags=30%, list=11%, signal=34%
MAINTENANCE_OF_PROTEIN_LOCALIZATION	MAINTENANCE_OF_PROTEIN_LOCALIZATION		12	-0.702056	-1.61707	0.015873	0.0225728	1	5199	tags=67%, list=17%, signal=80%
GSE7509_UNSTIM_VS_TNFA_IL1B_IL6_PGE_STIM_DC_UP	GSE7509_UNSTIM_VS_TNFA_IL1B_IL6_PGE_STIM_DC_UP		179	-0.418153	-1.61692	0	0.0225851	1	3087	tags=37%, list=10%, signal=41%
V$E2F_Q6_01	V$E2F_Q6_01		224	-0.412741	-1.61686	0	0.0225795	1	3425	tags=35%, list=11%, signal=39%
GSE24574_BCL6_HIGH_TFH_VS_NAIVE_CD4_TCELL_DN	GSE24574_BCL6_HIGH_TFH_VS_NAIVE_CD4_TCELL_DN		190	-0.412154	-1.61546	0.00632911	0.0228388	1	3902	tags=38%, list=12%, signal=43%
REACTOME_KINESINS	REACTOME_KINESINS		23	-0.593914	-1.6154	0.0105541	0.0228311	1	5634	tags=61%, list=18%, signal=74%
GSE20484_MCSG_VS_CXCL4_MONOCYTE_DERIVED_MACROPHAGE_UP	GSE20484_MCSG_VS_CXCL4_MONOCYTE_DERIVED_MACROPHAGE_UP		176	-0.415911	-1.61519	0	0.0228547	1	4034	tags=40%, list=13%, signal=45%
GSE15330_MEGAKARYOCYTE_ERYTHROID_PROGENITOR_VS_PRO_BCELL_DN	GSE15330_MEGAKARYOCYTE_ERYTHROID_PROGENITOR_VS_PRO_BCELL_DN		188	-0.416547	-1.61461	0	0.022958	1	4375	tags=38%, list=14%, signal=44%
JIANG_HYPOXIA_VIA_VHL	JIANG_HYPOXIA_VIA_VHL		34	-0.54016	-1.61406	0.0118694	0.0230762	1	3895	tags=41%, list=12%, signal=47%
GSE17721_12H_VS_24H_CPG_BMDM_DN	GSE17721_12H_VS_24H_CPG_BMDM_DN		189	-0.417749	-1.6134	0	0.0232018	1	4257	tags=40%, list=14%, signal=46%
PROTEIN_RNA_COMPLEX_ASSEMBLY	PROTEIN_RNA_COMPLEX_ASSEMBLY		64	-0.489782	-1.61339	0.00340136	0.0231835	1	6052	tags=48%, list=19%, signal=60%
COFACTOR_TRANSPORT	COFACTOR_TRANSPORT		10	-0.747881	-1.61325	0.0118765	0.0231934	1	3022	tags=50%, list=10%, signal=55%
MORF_RAC1	MORF_RAC1		209	-0.41735	-1.61275	0	0.0232712	1	4810	tags=37%, list=15%, signal=43%
GEORGES_CELL_CYCLE_MIR192_TARGETS	GEORGES_CELL_CYCLE_MIR192_TARGETS		61	-0.488218	-1.61231	0.00322581	0.0233423	1	4225	tags=44%, list=13%, signal=51%
YAO_TEMPORAL_RESPONSE_TO_PROGESTERONE_CLUSTER_16	YAO_TEMPORAL_RESPONSE_TO_PROGESTERONE_CLUSTER_16		68	-0.48621	-1.61188	0.00660066	0.0234207	1	3863	tags=29%, list=12%, signal=33%
NUCLEAR_CHROMOSOME	NUCLEAR_CHROMOSOME		50	-0.503262	-1.61156	0.00358423	0.0234909	1	4487	tags=48%, list=14%, signal=56%
GSE27786_NEUTROPHIL_VS_MONO_MAC_DN	GSE27786_NEUTROPHIL_VS_MONO_MAC_DN		192	-0.417295	-1.61092	0	0.0236214	1	4872	tags=41%, list=15%, signal=48%
JAZAERI_BREAST_CANCER_BRCA1_VS_BRCA2_UP	JAZAERI_BREAST_CANCER_BRCA1_VS_BRCA2_UP		47	-0.50507	-1.61053	0.0126183	0.0236819	1	4557	tags=43%, list=14%, signal=50%
GSE13411_PLASMA_CELL_VS_MEMORY_BCELL_UP	GSE13411_PLASMA_CELL_VS_MEMORY_BCELL_UP		172	-0.414881	-1.61	0	0.0237856	1	3430	tags=37%, list=11%, signal=42%
GSE3982_EOSINOPHIL_VS_MAST_CELL_DN	GSE3982_EOSINOPHIL_VS_MAST_CELL_DN		184	-0.418813	-1.60982	0	0.0238026	1	5498	tags=48%, list=17%, signal=58%
GSE26343_UNSTIM_VS_LPS_STIM_MACROPHAGE_UP	GSE26343_UNSTIM_VS_LPS_STIM_MACROPHAGE_UP		187	-0.419686	-1.60926	0.005291	0.0239108	1	4202	tags=43%, list=13%, signal=50%
SINGLE_STRANDED_DNA_BINDING	SINGLE_STRANDED_DNA_BINDING		33	-0.553802	-1.60918	0.00273224	0.0239033	1	6479	tags=67%, list=21%, signal=84%
CSR_EARLY_UP.V1_UP	CSR_EARLY_UP.V1_UP		154	-0.428934	-1.60883	0	0.0239537	1	4885	tags=39%, list=16%, signal=46%
TOMIDA_METASTASIS_UP	TOMIDA_METASTASIS_UP		25	-0.583368	-1.60831	0.0078125	0.0240508	1	5589	tags=48%, list=18%, signal=58%
GSE4984_UNTREATED_VS_LPS_TREATED_DC_DN	GSE4984_UNTREATED_VS_LPS_TREATED_DC_DN		159	-0.422899	-1.60822	0	0.0240516	1	4926	tags=43%, list=16%, signal=50%
COFACTOR_BIOSYNTHETIC_PROCESS	COFACTOR_BIOSYNTHETIC_PROCESS		20	-0.628192	-1.60783	0.026738	0.0241177	1	5346	tags=65%, list=17%, signal=78%
HALLMARK_ADIPOGENESIS	HALLMARK_ADIPOGENESIS		193	-0.415161	-1.60693	0	0.0242989	1	4515	tags=39%, list=14%, signal=46%
DIAZ_CHRONIC_MEYLOGENOUS_LEUKEMIA_UP	DIAZ_CHRONIC_MEYLOGENOUS_LEUKEMIA_UP		1346	-0.371558	-1.60656	0	0.0243536	1	5406	tags=40%, list=17%, signal=47%
GSE17721_POLYIC_VS_GARDIQUIMOD_8H_BMDM_DN	GSE17721_POLYIC_VS_GARDIQUIMOD_8H_BMDM_DN		185	-0.416785	-1.60654	0	0.0243374	1	3421	tags=30%, list=11%, signal=33%
GSE6875_TCONV_VS_TREG_DN	GSE6875_TCONV_VS_TREG_DN		173	-0.426443	-1.60648	0	0.0243278	1	4954	tags=35%, list=16%, signal=41%
GSE6259_FLT3L_INDUCED_33D1_POS_DC_VS_CD4_TCELL_DN	GSE6259_FLT3L_INDUCED_33D1_POS_DC_VS_CD4_TCELL_DN		159	-0.420027	-1.60592	0	0.0244381	1	3484	tags=40%, list=11%, signal=44%
GSE13493_DP_VS_CD8POS_THYMOCYTE_DN	GSE13493_DP_VS_CD8POS_THYMOCYTE_DN		179	-0.414156	-1.60359	0	0.0249626	1	3839	tags=34%, list=12%, signal=39%
GSE5589_WT_VS_IL10_KO_LPS_STIM_MACROPHAGE_45MIN_UP	GSE5589_WT_VS_IL10_KO_LPS_STIM_MACROPHAGE_45MIN_UP		184	-0.41389	-1.60235	0	0.0252276	1	5466	tags=45%, list=17%, signal=54%
ZHONG_SECRETOME_OF_LUNG_CANCER_AND_MACROPHAGE	ZHONG_SECRETOME_OF_LUNG_CANCER_AND_MACROPHAGE		71	-0.47088	-1.59924	0	0.0259697	1	2715	tags=34%, list=9%, signal=37%
GSE27786_LSK_VS_CD4_TCELL_UP	GSE27786_LSK_VS_CD4_TCELL_UP		187	-0.412531	-1.59834	0	0.0261659	1	3429	tags=35%, list=11%, signal=39%
LIU_SOX4_TARGETS_DN	LIU_SOX4_TARGETS_DN		290	-0.394586	-1.59747	0	0.0263467	1	5451	tags=42%, list=17%, signal=50%
GSE9509_10MIN_VS_30MIN_LPS_STIM_IL10_KO_MACROPHAGE_UP	GSE9509_10MIN_VS_30MIN_LPS_STIM_IL10_KO_MACROPHAGE_UP		190	-0.410593	-1.59742	0	0.0263383	1	4672	tags=41%, list=15%, signal=47%
NUCLEAR_ENVELOPE	NUCLEAR_ENVELOPE		70	-0.470083	-1.59733	0.010989	0.0263393	1	5840	tags=50%, list=19%, signal=61%
GSE17721_LPS_VS_CPG_4H_BMDM_DN	GSE17721_LPS_VS_CPG_4H_BMDM_DN		185	-0.411616	-1.5971	0	0.0263633	1	4219	tags=36%, list=13%, signal=42%
STRUCTURE_SPECIFIC_DNA_BINDING	STRUCTURE_SPECIFIC_DNA_BINDING		51	-0.487851	-1.59706	0.0138408	0.0263539	1	6479	tags=63%, list=21%, signal=79%
REACTOME_MTORC1_MEDIATED_SIGNALLING	REACTOME_MTORC1_MEDIATED_SIGNALLING		11	-0.695904	-1.5969	0.0225225	0.0263675	1	6986	tags=73%, list=22%, signal=93%
GSE27859_MACROPHAGE_VS_CD11C_INT_F480_INT_DC_DN	GSE27859_MACROPHAGE_VS_CD11C_INT_F480_INT_DC_DN		183	-0.413933	-1.5967	0	0.0263968	1	3371	tags=31%, list=11%, signal=35%
GSE39556_CD8A_DC_VS_NK_CELL_UP	GSE39556_CD8A_DC_VS_NK_CELL_UP		193	-0.406224	-1.59668	0	0.0263819	1	3958	tags=42%, list=13%, signal=48%
GSE19825_NAIVE_VS_DAY3_EFF_CD8_TCELL_DN	GSE19825_NAIVE_VS_DAY3_EFF_CD8_TCELL_DN		182	-0.417002	-1.59658	0	0.0263799	1	4026	tags=40%, list=13%, signal=46%
GSE21670_IL6_VS_TGFB_AND_IL6_TREATED_CD4_TCELL_DN	GSE21670_IL6_VS_TGFB_AND_IL6_TREATED_CD4_TCELL_DN		163	-0.423146	-1.59632	0	0.0264214	1	5590	tags=42%, list=18%, signal=50%
GSE5589_LPS_AND_IL10_VS_LPS_AND_IL6_STIM_MACROPHAGE_45MIN_DN	GSE5589_LPS_AND_IL10_VS_LPS_AND_IL6_STIM_MACROPHAGE_45MIN_DN		188	-0.418623	-1.59624	0	0.0264222	1	3918	tags=42%, list=12%, signal=48%
GSE29614_DAY3_VS_DAY7_TIV_FLU_VACCINE_PBMC_DN	GSE29614_DAY3_VS_DAY7_TIV_FLU_VACCINE_PBMC_DN		171	-0.413199	-1.59421	0	0.0268533	1	5038	tags=46%, list=16%, signal=55%
BENPORATH_MYC_MAX_TARGETS	BENPORATH_MYC_MAX_TARGETS		749	-0.366888	-1.59392	0	0.0269106	1	5048	tags=38%, list=16%, signal=44%
GSE13547_CTRL_VS_ANTI_IGM_STIM_ZFX_KO_BCELL_2H_DN	GSE13547_CTRL_VS_ANTI_IGM_STIM_ZFX_KO_BCELL_2H_DN		164	-0.423886	-1.59384	0	0.0269173	1	4556	tags=41%, list=14%, signal=48%
MITOTIC_SPINDLE_ORGANIZATION_AND_BIOGENESIS	MITOTIC_SPINDLE_ORGANIZATION_AND_BIOGENESIS		10	-0.733559	-1.59372	0.0313253	0.0269252	1	5581	tags=90%, list=18%, signal=109%
V$E2F_Q3	V$E2F_Q3		213	-0.404291	-1.59324	0	0.0270275	1	4567	tags=37%, list=15%, signal=43%
MODULE_439	MODULE_439		21	-0.606534	-1.59256	0.0134771	0.027144	1	2771	tags=48%, list=9%, signal=52%
GSE15930_NAIVE_VS_72H_IN_VITRO_STIM_IL12_CD8_TCELL_DN	GSE15930_NAIVE_VS_72H_IN_VITRO_STIM_IL12_CD8_TCELL_DN		189	-0.411002	-1.59238	0	0.0271645	1	3538	tags=35%, list=11%, signal=40%
MODULE_278	MODULE_278		33	-0.552411	-1.59237	0.0153846	0.0271473	1	3224	tags=39%, list=10%, signal=44%
GSE17721_POLYIC_VS_GARDIQUIMOD_24H_BMDM_DN	GSE17721_POLYIC_VS_GARDIQUIMOD_24H_BMDM_DN		198	-0.41147	-1.59131	0	0.0273867	1	4990	tags=39%, list=16%, signal=47%
LE_NEURONAL_DIFFERENTIATION_DN	LE_NEURONAL_DIFFERENTIATION_DN		18	-0.620269	-1.59123	0.0124688	0.0273849	1	2646	tags=44%, list=8%, signal=48%
KEGG_HUNTINGTONS_DISEASE	KEGG_HUNTINGTONS_DISEASE		166	-0.418893	-1.59087	0.00540541	0.0274434	1	4745	tags=35%, list=15%, signal=41%
OXIDOREDUCTASE_ACTIVITY_ACTING_ON_CH_OH_GROUP_OF_DONORS	OXIDOREDUCTASE_ACTIVITY_ACTING_ON_CH_OH_GROUP_OF_DONORS		54	-0.487722	-1.59044	0	0.02753	1	4942	tags=41%, list=16%, signal=48%
PRC2_EDD_UP.V1_UP	PRC2_EDD_UP.V1_UP		184	-0.412033	-1.59017	0	0.0275565	1	4590	tags=42%, list=15%, signal=49%
GSE14308_TH2_VS_NAIVE_CD4_TCELL_UP	GSE14308_TH2_VS_NAIVE_CD4_TCELL_UP		173	-0.411097	-1.58962	0	0.0276721	1	4218	tags=35%, list=13%, signal=40%
GSE11864_CSF1_VS_CSF1_IFNG_PAM3CYS_IN_MAC_DN	GSE11864_CSF1_VS_CSF1_IFNG_PAM3CYS_IN_MAC_DN		171	-0.415122	-1.58937	0	0.0277083	1	4638	tags=36%, list=15%, signal=42%
MODULE_25	MODULE_25		13	-0.682386	-1.58924	0.028103	0.0277216	1	3907	tags=62%, list=12%, signal=70%
GSE17721_POLYIC_VS_GARDIQUIMOD_12H_BMDM_DN	GSE17721_POLYIC_VS_GARDIQUIMOD_12H_BMDM_DN		185	-0.41775	-1.58916	0	0.027725	1	4027	tags=35%, list=13%, signal=40%
GSE30962_PRIMARY_VS_SECONDARY_CHRONIC_LCMV_INF_CD8_TCELL_UP	GSE30962_PRIMARY_VS_SECONDARY_CHRONIC_LCMV_INF_CD8_TCELL_UP		186	-0.408537	-1.58891	0	0.0277673	1	3546	tags=39%, list=11%, signal=44%
TCCCRNNRTGC_UNKNOWN	TCCCRNNRTGC_UNKNOWN		196	-0.407224	-1.58868	0	0.0278025	1	4365	tags=36%, list=14%, signal=42%
ORGANIC_ACID_METABOLIC_PROCESS	ORGANIC_ACID_METABOLIC_PROCESS		167	-0.416255	-1.58829	0	0.0278811	1	4231	tags=35%, list=13%, signal=41%
GSE43863_NAIVE_VS_LY6C_LOW_CXCR5NEG_CD4_EFF_TCELL_D6_LCMV_DN	GSE43863_NAIVE_VS_LY6C_LOW_CXCR5NEG_CD4_EFF_TCELL_D6_LCMV_DN		172	-0.417963	-1.58794	0	0.0279478	1	4202	tags=33%, list=13%, signal=38%
GSE21670_UNTREATED_VS_TGFB_IL6_TREATED_STAT3_KO_CD4_TCELL_UP	GSE21670_UNTREATED_VS_TGFB_IL6_TREATED_STAT3_KO_CD4_TCELL_UP		192	-0.412189	-1.58787	0	0.0279439	1	4418	tags=44%, list=14%, signal=51%
REACTOME_SYNTHESIS_OF_VERY_LONG_CHAIN_FATTY_ACYL_COAS	REACTOME_SYNTHESIS_OF_VERY_LONG_CHAIN_FATTY_ACYL_COAS		13	-0.670146	-1.58778	0.0260663	0.0279426	1	2732	tags=31%, list=9%, signal=34%
GSE17721_POLYIC_VS_CPG_16H_BMDM_DN	GSE17721_POLYIC_VS_CPG_16H_BMDM_DN		179	-0.41289	-1.58758	0	0.0279713	1	4219	tags=39%, list=13%, signal=45%
CELLULAR_BIOSYNTHETIC_PROCESS	CELLULAR_BIOSYNTHETIC_PROCESS		289	-0.387598	-1.58734	0	0.0280116	1	5225	tags=35%, list=17%, signal=42%
REACTOME_CDC6_ASSOCIATION_WITH_THE_ORC_ORIGIN_COMPLEX	REACTOME_CDC6_ASSOCIATION_WITH_THE_ORC_ORIGIN_COMPLEX		11	-0.703185	-1.58663	0.0250627	0.0281592	1	3017	tags=45%, list=10%, signal=50%
CELL_CYCLE_CHECKPOINT_GO_0000075	CELL_CYCLE_CHECKPOINT_GO_0000075		47	-0.5016	-1.58629	0.0155763	0.0282264	1	4610	tags=49%, list=15%, signal=57%
WHITE_NEUROBLASTOMA_WITH_1P36.3_DELETION	WHITE_NEUROBLASTOMA_WITH_1P36.3_DELETION		19	-0.615374	-1.5848	0.013089	0.0285724	1	5442	tags=47%, list=17%, signal=57%
GSE7218_UNSTIM_VS_ANTIGEN_STIM_THROUGH_IGG_BCELL_UP	GSE7218_UNSTIM_VS_ANTIGEN_STIM_THROUGH_IGG_BCELL_UP		178	-0.410818	-1.58456	0	0.0286023	1	4502	tags=37%, list=14%, signal=43%
BIOCARTA_G2_PATHWAY	BIOCARTA_G2_PATHWAY		23	-0.595917	-1.58446	0.0170455	0.0286077	1	3331	tags=52%, list=11%, signal=58%
OXIDOREDUCTASE_ACTIVITY_ACTING_ON_THE_CH_CH_GROUP_OF_DONORS	OXIDOREDUCTASE_ACTIVITY_ACTING_ON_THE_CH_CH_GROUP_OF_DONORS		23	-0.599929	-1.58417	0.0195531	0.0286491	1	4853	tags=43%, list=15%, signal=51%
GSE42088_2H_VS_24H_LEISHMANIA_INF_DC_DN	GSE42088_2H_VS_24H_LEISHMANIA_INF_DC_DN		167	-0.410716	-1.58413	0	0.0286338	1	5072	tags=37%, list=16%, signal=44%
SMALL_NUCLEAR_RIBONUCLEOPROTEIN_COMPLEX	SMALL_NUCLEAR_RIBONUCLEOPROTEIN_COMPLEX		22	-0.598785	-1.58376	0.0164835	0.0287029	1	5830	tags=73%, list=19%, signal=89%
GHO_ATF5_TARGETS_DN	GHO_ATF5_TARGETS_DN		16	-0.630039	-1.58308	0.0335917	0.0288532	1	2290	tags=44%, list=7%, signal=47%
GSE19772_CTRL_VS_HCMV_INF_MONOCYTES_AND_PI3K_INHIBITION_DN	GSE19772_CTRL_VS_HCMV_INF_MONOCYTES_AND_PI3K_INHIBITION_DN		181	-0.406845	-1.58244	0	0.0290009	1	3694	tags=29%, list=12%, signal=33%
GSE19888_NO_PRETREAT_VS_ADENOSINE_A3R_INHIBITOR_PRETREATED_MAST_CELL_TCELL_MEMBRANES_ACT_UP	GSE19888_NO_PRETREAT_VS_ADENOSINE_A3R_INHIBITOR_PRETREATED_MAST_CELL_TCELL_MEMBRANES_ACT_UP		180	-0.407112	-1.58157	0	0.0292278	1	3647	tags=34%, list=12%, signal=39%
GSE17721_LPS_VS_CPG_8H_BMDM_DN	GSE17721_LPS_VS_CPG_8H_BMDM_DN		187	-0.413725	-1.58148	0	0.0292265	1	4105	tags=40%, list=13%, signal=45%
GSE45365_CTRL_VS_MCMV_INFECTION_NK_CELL_DN	GSE45365_CTRL_VS_MCMV_INFECTION_NK_CELL_DN		169	-0.404215	-1.57979	0	0.0296447	1	4141	tags=34%, list=13%, signal=39%
GSE16385_UNTREATED_VS_12H_IFNG_TNF_TREATED_MACROPHAGE_DN	GSE16385_UNTREATED_VS_12H_IFNG_TNF_TREATED_MACROPHAGE_DN		173	-0.409876	-1.57898	0	0.0298473	1	4040	tags=36%, list=13%, signal=41%
MODY_HIPPOCAMPUS_PRENATAL	MODY_HIPPOCAMPUS_PRENATAL		39	-0.512421	-1.57876	0	0.0298767	1	5688	tags=51%, list=18%, signal=63%
RNA_3END_PROCESSING	RNA_3END_PROCESSING		10	-0.715533	-1.57858	0.0328638	0.0298963	1	5570	tags=80%, list=18%, signal=97%
GSE17301_CTRL_VS_48H_ACD3_ACD28_IFNA2_STIM_CD8_TCELL_UP	GSE17301_CTRL_VS_48H_ACD3_ACD28_IFNA2_STIM_CD8_TCELL_UP		185	-0.402738	-1.57829	0	0.02994	1	5253	tags=45%, list=17%, signal=54%
ESC_J1_UP_LATE.V1_DN	ESC_J1_UP_LATE.V1_DN		165	-0.410332	-1.57741	0	0.0301234	1	3559	tags=33%, list=11%, signal=37%
CHR11P14	CHR11P14		20	-0.612074	-1.57732	0.0153846	0.0301223	1	7422	tags=60%, list=24%, signal=78%
GSE13306_TREG_VS_TCONV_DN	GSE13306_TREG_VS_TCONV_DN		173	-0.412734	-1.57616	0	0.0303893	1	4297	tags=39%, list=14%, signal=45%
DOANE_BREAST_CANCER_ESR1_DN	DOANE_BREAST_CANCER_ESR1_DN		37	-0.513154	-1.57582	0.0248447	0.0304651	1	5394	tags=32%, list=17%, signal=39%
GSE33424_CD161_HIGH_VS_NEG_CD8_TCELL_DN	GSE33424_CD161_HIGH_VS_NEG_CD8_TCELL_DN		177	-0.40733	-1.57563	0	0.030485	1	3713	tags=34%, list=12%, signal=39%
GSE5679_PPARG_LIGAND_ROSIGLITAZONE_VS_RARA_AGONIST_AM580_TREATED_DC_UP	GSE5679_PPARG_LIGAND_ROSIGLITAZONE_VS_RARA_AGONIST_AM580_TREATED_DC_UP		182	-0.408392	-1.57562	0	0.0304632	1	3538	tags=36%, list=11%, signal=41%
MATTIOLI_MGUS_VS_MULTIPLE_MYELOMA	MATTIOLI_MGUS_VS_MULTIPLE_MYELOMA		16	-0.623083	-1.57553	0.0268817	0.0304628	1	5994	tags=69%, list=19%, signal=85%
ZHAN_MULTIPLE_MYELOMA_CD1_UP	ZHAN_MULTIPLE_MYELOMA_CD1_UP		42	-0.522469	-1.57547	0.00325733	0.0304633	1	3549	tags=43%, list=11%, signal=48%
WHITFIELD_CELL_CYCLE_G1_S	WHITFIELD_CELL_CYCLE_G1_S		135	-0.426207	-1.57479	0	0.0306194	1	4649	tags=44%, list=15%, signal=52%
GSE45365_CD8A_DC_VS_CD11B_DC_IFNAR_KO_DN	GSE45365_CD8A_DC_VS_CD11B_DC_IFNAR_KO_DN		165	-0.41677	-1.57378	0	0.0308785	1	2280	tags=25%, list=7%, signal=27%
EXONUCLEASE_ACTIVITY	EXONUCLEASE_ACTIVITY		18	-0.632967	-1.57364	0.0250627	0.0308946	1	5013	tags=72%, list=16%, signal=86%
GSE15324_NAIVE_VS_ACTIVATED_CD8_TCELL_DN	GSE15324_NAIVE_VS_ACTIVATED_CD8_TCELL_DN		185	-0.410604	-1.57343	0	0.0309239	1	4593	tags=37%, list=15%, signal=43%
GSE360_L_DONOVANI_VS_M_TUBERCULOSIS_DC_UP	GSE360_L_DONOVANI_VS_M_TUBERCULOSIS_DC_UP		181	-0.401776	-1.5729	0	0.0310391	1	3029	tags=28%, list=10%, signal=31%
COENZYME_METABOLIC_PROCESS	COENZYME_METABOLIC_PROCESS		35	-0.545953	-1.57275	0.022792	0.0310611	1	3707	tags=40%, list=12%, signal=45%
ATP_DEPENDENT_HELICASE_ACTIVITY	ATP_DEPENDENT_HELICASE_ACTIVITY		27	-0.581214	-1.57264	0.00852273	0.0310717	1	4508	tags=44%, list=14%, signal=52%
V$USF2_Q6	V$USF2_Q6		223	-0.39982	-1.57202	0	0.0312284	1	4672	tags=36%, list=15%, signal=42%
REACTOME_REMOVAL_OF_THE_FLAP_INTERMEDIATE_FROM_THE_C_STRAND	REACTOME_REMOVAL_OF_THE_FLAP_INTERMEDIATE_FROM_THE_C_STRAND		10	-0.716366	-1.57168	0.027972	0.0312802	1	5274	tags=90%, list=17%, signal=108%
YAMAZAKI_TCEB3_TARGETS_DN	YAMAZAKI_TCEB3_TARGETS_DN		196	-0.407436	-1.57122	0	0.0313644	1	4081	tags=37%, list=13%, signal=42%
REGULATION_OF_DNA_REPLICATION	REGULATION_OF_DNA_REPLICATION		19	-0.619063	-1.57121	0.0257069	0.0313422	1	2584	tags=42%, list=8%, signal=46%
GSE19941_UNSTIM_VS_LPS_AND_IL10_STIM_IL10_KO_MACROPHAGE_DN	GSE19941_UNSTIM_VS_LPS_AND_IL10_STIM_IL10_KO_MACROPHAGE_DN		176	-0.407287	-1.57053	0	0.0315	1	4373	tags=44%, list=14%, signal=51%
REACTOME_REGULATION_OF_INSULIN_LIKE_GROWTH_FACTOR_IGF_ACTIVITY_BY_INSULIN_LIKE_GROWTH_FACTOR_BINDING_PROTEINS_IGFBPS	REACTOME_REGULATION_OF_INSULIN_LIKE_GROWTH_FACTOR_IGF_ACTIVITY_BY_INSULIN_LIKE_GROWTH_FACTOR_BINDING_PROTEINS_IGFBPS		15	-0.643427	-1.57042	0.042328	0.0315173	1	4	tags=7%, list=0%, signal=7%
GSE25123_IL4_VS_IL4_AND_ROSIGLITAZONE_STIM_PPARG_KO_MACROPHAGE_DAY10_UP	GSE25123_IL4_VS_IL4_AND_ROSIGLITAZONE_STIM_PPARG_KO_MACROPHAGE_DAY10_UP		127	-0.424821	-1.57039	0	0.0315029	1	4977	tags=39%, list=16%, signal=46%
GSE1460_INTRATHYMIC_T_PROGENITOR_VS_CD4_THYMOCYTE_UP	GSE1460_INTRATHYMIC_T_PROGENITOR_VS_CD4_THYMOCYTE_UP		184	-0.400688	-1.56972	0	0.0316636	1	4017	tags=36%, list=13%, signal=42%
NIKOLSKY_BREAST_CANCER_12Q24_AMPLICON	NIKOLSKY_BREAST_CANCER_12Q24_AMPLICON		14	-0.657503	-1.56931	0.0328283	0.0317358	1	3356	tags=50%, list=11%, signal=56%
GSE22443_IL2_VS_IL12_TREATED_ACT_CD8_TCELL_DN	GSE22443_IL2_VS_IL12_TREATED_ACT_CD8_TCELL_DN		193	-0.399446	-1.56889	0	0.0318261	1	3750	tags=34%, list=12%, signal=38%
KEGG_FRUCTOSE_AND_MANNOSE_METABOLISM	KEGG_FRUCTOSE_AND_MANNOSE_METABOLISM		33	-0.541535	-1.56856	0.00826446	0.0318878	1	6776	tags=61%, list=22%, signal=77%
NUCLEOPLASM	NUCLEOPLASM		267	-0.386833	-1.56776	0	0.0320865	1	5366	tags=41%, list=17%, signal=49%
GSE3039_NKT_CELL_VS_ALPHABETA_CD8_TCELL_UP	GSE3039_NKT_CELL_VS_ALPHABETA_CD8_TCELL_UP		186	-0.404639	-1.56666	0	0.0323652	1	5195	tags=41%, list=17%, signal=49%
GSE12963_UNINF_VS_ENV_AND_NEF_DEFICIENT_HIV1_INF_CD4_TCELL_DN	GSE12963_UNINF_VS_ENV_AND_NEF_DEFICIENT_HIV1_INF_CD4_TCELL_DN		124	-0.426262	-1.56656	0	0.0323607	1	4858	tags=39%, list=15%, signal=46%
MORF_BAG5	MORF_BAG5		56	-0.475319	-1.56617	0.00671141	0.0324311	1	5395	tags=45%, list=17%, signal=54%
GSE27786_NKTCELL_VS_MONO_MAC_UP	GSE27786_NKTCELL_VS_MONO_MAC_UP		190	-0.404501	-1.56513	0	0.0326806	1	5117	tags=43%, list=16%, signal=51%
GSE5589_WT_VS_IL10_KO_LPS_STIM_MACROPHAGE_180MIN_UP	GSE5589_WT_VS_IL10_KO_LPS_STIM_MACROPHAGE_180MIN_UP		147	-0.413841	-1.56502	0	0.0326813	1	4890	tags=41%, list=16%, signal=49%
SPIELMAN_LYMPHOBLAST_EUROPEAN_VS_ASIAN_UP	SPIELMAN_LYMPHOBLAST_EUROPEAN_VS_ASIAN_UP		470	-0.374248	-1.56441	0	0.0328288	1	4508	tags=35%, list=14%, signal=41%
GSE7509_UNSTIM_VS_FCGRIIB_STIM_DC_UP	GSE7509_UNSTIM_VS_FCGRIIB_STIM_DC_UP		154	-0.414871	-1.56429	0	0.032845	1	5435	tags=40%, list=17%, signal=48%
GSE3982_DC_VS_TH2_DN	GSE3982_DC_VS_TH2_DN		190	-0.40484	-1.56417	0	0.0328507	1	3192	tags=35%, list=10%, signal=38%
V$E2F1_Q3	V$E2F1_Q3		230	-0.396579	-1.56411	0	0.0328493	1	4125	tags=37%, list=13%, signal=42%
GSE20500_CTRL_VS_RARA_ANTAGONIST_TREATED_CD4_TCELL_DN	GSE20500_CTRL_VS_RARA_ANTAGONIST_TREATED_CD4_TCELL_DN		188	-0.407659	-1.56401	0	0.0328582	1	5132	tags=43%, list=16%, signal=51%
REACTOME_REGULATION_OF_APOPTOSIS	REACTOME_REGULATION_OF_APOPTOSIS		55	-0.484432	-1.56397	0.0192308	0.0328466	1	4877	tags=55%, list=16%, signal=64%
NADH_DEHYDROGENASE_COMPLEX	NADH_DEHYDROGENASE_COMPLEX		14	-0.654014	-1.56355	0.0317848	0.0329408	1	5225	tags=57%, list=17%, signal=68%
CHANDRAN_METASTASIS_TOP50_UP	CHANDRAN_METASTASIS_TOP50_UP		36	-0.535578	-1.56247	0.00879765	0.0332121	1	5015	tags=50%, list=16%, signal=59%
CELLULAR_RESPONSE_TO_EXTRACELLULAR_STIMULUS	CELLULAR_RESPONSE_TO_EXTRACELLULAR_STIMULUS		11	-0.693134	-1.56187	0.0213777	0.0333557	1	3331	tags=27%, list=11%, signal=30%
GSE4984_GALECTIN1_VS_VEHICLE_CTRL_TREATED_DC_DN	GSE4984_GALECTIN1_VS_VEHICLE_CTRL_TREATED_DC_DN		179	-0.403323	-1.56119	0	0.0335182	1	5669	tags=47%, list=18%, signal=58%
POS_RESPONSE_TO_HISTAMINE_DN	POS_RESPONSE_TO_HISTAMINE_DN		11	-0.687413	-1.56089	0.0415704	0.0335821	1	2238	tags=36%, list=7%, signal=39%
MITOCHONDRIAL_RESPIRATORY_CHAIN_COMPLEX_I	MITOCHONDRIAL_RESPIRATORY_CHAIN_COMPLEX_I		14	-0.654014	-1.55968	0.0421836	0.0339028	1	5225	tags=57%, list=17%, signal=68%
ACEVEDO_LIVER_TUMOR_VS_NORMAL_ADJACENT_TISSUE_UP	ACEVEDO_LIVER_TUMOR_VS_NORMAL_ADJACENT_TISSUE_UP		801	-0.362521	-1.55955	0	0.0339119	1	5398	tags=40%, list=17%, signal=47%
WHITFIELD_CELL_CYCLE_G2	WHITFIELD_CELL_CYCLE_G2		170	-0.407325	-1.55918	0	0.0339823	1	5032	tags=44%, list=16%, signal=52%
GSE46606_UNSTIM_VS_CD40L_IL2_IL5_1DAY_STIMULATED_IRF4_KO_BCELL_UP	GSE46606_UNSTIM_VS_CD40L_IL2_IL5_1DAY_STIMULATED_IRF4_KO_BCELL_UP		189	-0.400576	-1.55866	0	0.0341172	1	3585	tags=39%, list=11%, signal=44%
GSE28737_FOLLICULAR_VS_MARGINAL_ZONE_BCELL_UP	GSE28737_FOLLICULAR_VS_MARGINAL_ZONE_BCELL_UP		188	-0.394803	-1.55784	0	0.0343239	1	4934	tags=38%, list=16%, signal=45%
GSE2770_IL12_VS_IL4_TREATED_ACT_CD4_TCELL_6H_UP	GSE2770_IL12_VS_IL4_TREATED_ACT_CD4_TCELL_6H_UP		168	-0.403291	-1.55666	0	0.034625	1	4750	tags=35%, list=15%, signal=40%
REACTOME_DEADENYLATION_DEPENDENT_MRNA_DECAY	REACTOME_DEADENYLATION_DEPENDENT_MRNA_DECAY		43	-0.497558	-1.55636	0.00882353	0.0346953	1	5953	tags=51%, list=19%, signal=63%
GSE24102_GRANULOCYSTIC_MDSC_VS_NEUTROPHIL_DN	GSE24102_GRANULOCYSTIC_MDSC_VS_NEUTROPHIL_DN		180	-0.402872	-1.55619	0	0.0347227	1	5441	tags=48%, list=17%, signal=58%
OKAWA_NEUROBLASTOMA_1P36_31_DELETION	OKAWA_NEUROBLASTOMA_1P36_31_DELETION		19	-0.606129	-1.55599	0.0337662	0.0347545	1	3715	tags=37%, list=12%, signal=42%
GSE9509_LPS_VS_LPS_AND_IL10_STIM_IL10_KO_MACROPHAGE_20MIN_DN	GSE9509_LPS_VS_LPS_AND_IL10_STIM_IL10_KO_MACROPHAGE_20MIN_DN		191	-0.398673	-1.55519	0	0.0349679	1	4304	tags=39%, list=14%, signal=45%
REACTOME_RNA_POL_III_TRANSCRIPTION_TERMINATION	REACTOME_RNA_POL_III_TRANSCRIPTION_TERMINATION		19	-0.62983	-1.55509	0.0159151	0.0349729	1	4633	tags=63%, list=15%, signal=74%
REACTOME_METABOLISM_OF_PROTEINS	REACTOME_METABOLISM_OF_PROTEINS		419	-0.367672	-1.55471	0	0.0350583	1	4154	tags=30%, list=13%, signal=34%
NFE2L2.V2	NFE2L2.V2		378	-0.377038	-1.55338	0	0.0354345	1	4090	tags=29%, list=13%, signal=33%
GSE11961_MEMORY_BCELL_DAY40_VS_GERMINAL_CENTER_BCELL_DAY40_UP	GSE11961_MEMORY_BCELL_DAY40_VS_GERMINAL_CENTER_BCELL_DAY40_UP		175	-0.407727	-1.55295	0	0.0355475	1	4332	tags=35%, list=14%, signal=40%
DANG_BOUND_BY_MYC	DANG_BOUND_BY_MYC		1042	-0.348069	-1.55293	0	0.0355263	1	4957	tags=38%, list=16%, signal=43%
GSE12845_IGD_POS_BLOOD_VS_DARKZONE_GC_TONSIL_BCELL_DN	GSE12845_IGD_POS_BLOOD_VS_DARKZONE_GC_TONSIL_BCELL_DN		191	-0.399273	-1.55217	0	0.035759	1	5038	tags=40%, list=16%, signal=48%
KEGG_DRUG_METABOLISM_OTHER_ENZYMES	KEGG_DRUG_METABOLISM_OTHER_ENZYMES		39	-0.506727	-1.55153	0.00887574	0.0359013	1	4916	tags=31%, list=16%, signal=36%
GSE14350_IL2RB_KO_VS_WT_TEFF_DN	GSE14350_IL2RB_KO_VS_WT_TEFF_DN		174	-0.4067	-1.55096	0	0.0360342	1	5340	tags=46%, list=17%, signal=55%
GSE36476_YOUNG_VS_OLD_DONOR_MEMORY_CD4_TCELL_72H_TSST_ACT_UP	GSE36476_YOUNG_VS_OLD_DONOR_MEMORY_CD4_TCELL_72H_TSST_ACT_UP		160	-0.410008	-1.55082	0	0.0360451	1	3082	tags=24%, list=10%, signal=27%
STEIN_ESRRA_TARGETS	STEIN_ESRRA_TARGETS		495	-0.367726	-1.55056	0	0.0360927	1	4063	tags=34%, list=13%, signal=38%
SASAKI_ADULT_T_CELL_LEUKEMIA	SASAKI_ADULT_T_CELL_LEUKEMIA		164	-0.410054	-1.55032	0	0.0361343	1	4390	tags=38%, list=14%, signal=44%
GSE17974_1.5H_VS_72H_IL4_AND_ANTI_IL12_ACT_CD4_TCELL_DN	GSE17974_1.5H_VS_72H_IL4_AND_ANTI_IL12_ACT_CD4_TCELL_DN		187	-0.396729	-1.55015	0	0.0361638	1	3870	tags=35%, list=12%, signal=39%
VANHARANTA_UTERINE_FIBROID_WITH_7Q_DELETION_UP	VANHARANTA_UTERINE_FIBROID_WITH_7Q_DELETION_UP		64	-0.46478	-1.5499	0.00746269	0.036206	1	5127	tags=48%, list=16%, signal=58%
GCM_DDX5	GCM_DDX5		65	-0.458183	-1.5477	0.00335571	0.0368964	1	5505	tags=48%, list=18%, signal=58%
TSENG_IRS1_TARGETS_UP	TSENG_IRS1_TARGETS_UP		96	-0.436605	-1.5477	0.004	0.0368701	1	2978	tags=30%, list=9%, signal=33%
CAFFAREL_RESPONSE_TO_THC_24HR_3_DN	CAFFAREL_RESPONSE_TO_THC_24HR_3_DN		13	-0.662252	-1.54767	0.0420792	0.0368524	1	3280	tags=46%, list=10%, signal=52%
GSE21670_STAT3_KO_VS_WT_CD4_TCELL_DN	GSE21670_STAT3_KO_VS_WT_CD4_TCELL_DN		180	-0.397998	-1.54763	0	0.0368382	1	3704	tags=40%, list=12%, signal=45%
DNA_FRAGMENTATION_DURING_APOPTOSIS	DNA_FRAGMENTATION_DURING_APOPTOSIS		13	-0.639403	-1.54736	0.0432692	0.0368873	1	3807	tags=54%, list=12%, signal=61%
CREIGHTON_ENDOCRINE_THERAPY_RESISTANCE_1	CREIGHTON_ENDOCRINE_THERAPY_RESISTANCE_1		480	-0.373102	-1.54735	0	0.0368638	1	3457	tags=31%, list=11%, signal=34%
GSE26669_CTRL_VS_COSTIM_BLOCK_MLR_CD4_TCELL_UP	GSE26669_CTRL_VS_COSTIM_BLOCK_MLR_CD4_TCELL_UP		186	-0.404468	-1.5472	0.00515464	0.0368799	1	4073	tags=40%, list=13%, signal=46%
CHR7Q35	CHR7Q35		21	-0.584321	-1.54703	0.016129	0.0368984	1	4146	tags=38%, list=13%, signal=44%
KEGG_GALACTOSE_METABOLISM	KEGG_GALACTOSE_METABOLISM		24	-0.573972	-1.54652	0.0378378	0.0370299	1	5392	tags=58%, list=17%, signal=70%
MACROMOLECULAR_COMPLEX_DISASSEMBLY	MACROMOLECULAR_COMPLEX_DISASSEMBLY		13	-0.64979	-1.54639	0.048718	0.0370493	1	5909	tags=69%, list=19%, signal=85%
REACTOME_TRIGLYCERIDE_BIOSYNTHESIS	REACTOME_TRIGLYCERIDE_BIOSYNTHESIS		37	-0.526187	-1.54561	0.0160428	0.0372676	1	5437	tags=49%, list=17%, signal=59%
GSE4748_CYANOBACTERIUM_LPSLIKE_VS_LPS_AND_CYANOBACTERIUM_LPSLIKE_STIM_DC_3H_DN	GSE4748_CYANOBACTERIUM_LPSLIKE_VS_LPS_AND_CYANOBACTERIUM_LPSLIKE_STIM_DC_3H_DN		147	-0.409014	-1.54481	0	0.0374781	1	2997	tags=22%, list=10%, signal=25%
HEIDENBLAD_AMPLICON_8Q24_UP	HEIDENBLAD_AMPLICON_8Q24_UP		35	-0.513164	-1.54438	0.0145349	0.0375839	1	3462	tags=34%, list=11%, signal=38%
GLYCOSAMINOGLYCAN_BINDING	GLYCOSAMINOGLYCAN_BINDING		30	-0.531728	-1.54405	0.0237389	0.0376484	1	2222	tags=23%, list=7%, signal=25%
GSE25146_UNSTIM_VS_HELIOBACTER_PYLORI_LPS_STIM_AGS_CELL_UP	GSE25146_UNSTIM_VS_HELIOBACTER_PYLORI_LPS_STIM_AGS_CELL_UP		169	-0.402706	-1.54358	0	0.0377599	1	4755	tags=43%, list=15%, signal=51%
GCNP_SHH_UP_EARLY.V1_UP	GCNP_SHH_UP_EARLY.V1_UP		160	-0.404929	-1.54356	0	0.03774	1	4047	tags=32%, list=13%, signal=36%
NIELSEN_SCHWANNOMA_DN	NIELSEN_SCHWANNOMA_DN		12	-0.678719	-1.54196	0.0360111	0.0382133	1	1882	tags=33%, list=6%, signal=35%
GSE15624_CTRL_VS_3H_HALOFUGINONE_TREATED_CD4_TCELL_DN	GSE15624_CTRL_VS_3H_HALOFUGINONE_TREATED_CD4_TCELL_DN		152	-0.410193	-1.5414	0	0.0383393	1	5592	tags=46%, list=18%, signal=56%
HEPARIN_BINDING	HEPARIN_BINDING		20	-0.598733	-1.54124	0.0321782	0.0383659	1	2222	tags=30%, list=7%, signal=32%
GSE17721_0.5H_VS_8H_GARDIQUIMOD_BMDM_UP	GSE17721_0.5H_VS_8H_GARDIQUIMOD_BMDM_UP		187	-0.39632	-1.54111	0	0.0383793	1	4157	tags=35%, list=13%, signal=40%
WILCOX_RESPONSE_TO_PROGESTERONE_UP	WILCOX_RESPONSE_TO_PROGESTERONE_UP		137	-0.407955	-1.54098	0	0.038392	1	2902	tags=36%, list=9%, signal=40%
KEGG_OXIDATIVE_PHOSPHORYLATION	KEGG_OXIDATIVE_PHOSPHORYLATION		110	-0.426877	-1.54096	0.00392157	0.0383718	1	5923	tags=40%, list=19%, signal=49%
RESPIRATORY_CHAIN_COMPLEX_I	RESPIRATORY_CHAIN_COMPLEX_I		14	-0.654014	-1.54061	0.028133	0.038452	1	5225	tags=57%, list=17%, signal=68%
GSE34217_MIR17_92_OVEREXPRESS_VS_WT_ACT_CD8_TCELL_DN	GSE34217_MIR17_92_OVEREXPRESS_VS_WT_ACT_CD8_TCELL_DN		122	-0.412049	-1.5402	0	0.0385479	1	4601	tags=35%, list=15%, signal=41%
CELLULAR_COMPONENT_DISASSEMBLY	CELLULAR_COMPONENT_DISASSEMBLY		29	-0.543393	-1.54004	0.0173913	0.0385688	1	4828	tags=55%, list=15%, signal=65%
ORGANELLE_OUTER_MEMBRANE	ORGANELLE_OUTER_MEMBRANE		24	-0.565049	-1.53981	0.0160428	0.0386127	1	5811	tags=54%, list=18%, signal=66%
LEE_LIVER_CANCER_ACOX1_DN	LEE_LIVER_CANCER_ACOX1_DN		54	-0.469342	-1.53957	0.00619195	0.0386574	1	3438	tags=24%, list=11%, signal=27%
GSE18791_CTRL_VS_NEWCASTLE_VIRUS_DC_2H_UP	GSE18791_CTRL_VS_NEWCASTLE_VIRUS_DC_2H_UP		167	-0.402362	-1.5395	0	0.0386495	1	3130	tags=29%, list=10%, signal=32%
CARBOXYLIC_ACID_METABOLIC_PROCESS	CARBOXYLIC_ACID_METABOLIC_PROCESS		165	-0.407186	-1.53905	0	0.0387607	1	4231	tags=35%, list=13%, signal=40%
GCM_PSME1	GCM_PSME1		85	-0.437822	-1.53885	0	0.038792	1	5183	tags=41%, list=16%, signal=49%
GUILLAUMOND_KLF10_TARGETS_UP	GUILLAUMOND_KLF10_TARGETS_UP		46	-0.492839	-1.53834	0.0126984	0.038922	1	1829	tags=22%, list=6%, signal=23%
REACTOME_CITRIC_ACID_CYCLE_TCA_CYCLE	REACTOME_CITRIC_ACID_CYCLE_TCA_CYCLE		20	-0.579839	-1.5382	0.0380048	0.0389347	1	3229	tags=45%, list=10%, signal=50%
GSE16451_IMMATURE_VS_MATURE_NEURON_CELL_LINE_WEST_EQUINE_ENC_VIRUS_UP	GSE16451_IMMATURE_VS_MATURE_NEURON_CELL_LINE_WEST_EQUINE_ENC_VIRUS_UP		178	-0.403974	-1.53816	0.005291	0.038921	1	4363	tags=34%, list=14%, signal=40%
GSE1460_DP_THYMOCYTE_VS_NAIVE_CD4_TCELL_CORD_BLOOD_UP	GSE1460_DP_THYMOCYTE_VS_NAIVE_CD4_TCELL_CORD_BLOOD_UP		188	-0.397551	-1.53808	0	0.0389156	1	4009	tags=32%, list=13%, signal=37%
GSE17721_POLYIC_VS_PAM3CSK4_12H_BMDM_DN	GSE17721_POLYIC_VS_PAM3CSK4_12H_BMDM_DN		184	-0.394473	-1.5379	0	0.0389466	1	4133	tags=40%, list=13%, signal=45%
GSE3982_EOSINOPHIL_VS_MAC_DN	GSE3982_EOSINOPHIL_VS_MAC_DN		189	-0.39839	-1.53728	0	0.0391342	1	3011	tags=34%, list=10%, signal=37%
HOFMANN_MYELODYSPLASTIC_SYNDROM_LOW_RISK_DN	HOFMANN_MYELODYSPLASTIC_SYNDROM_LOW_RISK_DN		26	-0.563843	-1.53662	0.015	0.0393265	1	7046	tags=58%, list=22%, signal=74%
SMITH_LIVER_CANCER	SMITH_LIVER_CANCER		43	-0.489268	-1.53604	0.0151515	0.0394761	1	3158	tags=42%, list=10%, signal=46%
GSE5542_IFNG_VS_IFNA_TREATED_EPITHELIAL_CELLS_24H_UP	GSE5542_IFNG_VS_IFNA_TREATED_EPITHELIAL_CELLS_24H_UP		183	-0.398776	-1.53532	0	0.0396497	1	5397	tags=42%, list=17%, signal=50%
GSE17721_LPS_VS_GARDIQUIMOD_8H_BMDM_DN	GSE17721_LPS_VS_GARDIQUIMOD_8H_BMDM_DN		186	-0.402486	-1.53492	0	0.0397487	1	4179	tags=33%, list=13%, signal=38%
CHEOK_RESPONSE_TO_MERCAPTOPURINE_UP	CHEOK_RESPONSE_TO_MERCAPTOPURINE_UP		12	-0.676062	-1.53467	0.0451128	0.039793	1	3331	tags=50%, list=11%, signal=56%
GSE5503_MLN_DC_VS_SPLEEN_DC_ACTIVATED_ALLOGENIC_TCELL_DN	GSE5503_MLN_DC_VS_SPLEEN_DC_ACTIVATED_ALLOGENIC_TCELL_DN		184	-0.402289	-1.53449	0	0.0398307	1	5627	tags=48%, list=18%, signal=58%
GSE13522_CTRL_VS_T_CRUZI_Y_STRAIN_INF_SKIN_IFNG_KO_DN	GSE13522_CTRL_VS_T_CRUZI_Y_STRAIN_INF_SKIN_IFNG_KO_DN		122	-0.414147	-1.53435	0.00436681	0.0398435	1	5218	tags=39%, list=17%, signal=47%
LI_AMPLIFIED_IN_LUNG_CANCER	LI_AMPLIFIED_IN_LUNG_CANCER		164	-0.399307	-1.53421	0	0.0398695	1	5108	tags=36%, list=16%, signal=43%
GSE11386_NAIVE_VS_MEMORY_BCELL_UP	GSE11386_NAIVE_VS_MEMORY_BCELL_UP		175	-0.399421	-1.53344	0	0.0400722	1	5033	tags=46%, list=16%, signal=55%
GSE14908_ATOPIC_VS_NONATOPIC_PATIENT_HDM_STIM_CD4_TCELL_UP	GSE14908_ATOPIC_VS_NONATOPIC_PATIENT_HDM_STIM_CD4_TCELL_UP		185	-0.395197	-1.53219	0	0.0404242	1	5404	tags=46%, list=17%, signal=56%
GSE27786_LSK_VS_NKCELL_UP	GSE27786_LSK_VS_NKCELL_UP		184	-0.393529	-1.53179	0	0.040528	1	3695	tags=35%, list=12%, signal=39%
GSE21670_IL6_VS_TGFB_AND_IL6_TREATED_STAT3_KO_CD4_TCELL_UP	GSE21670_IL6_VS_TGFB_AND_IL6_TREATED_STAT3_KO_CD4_TCELL_UP		191	-0.389272	-1.53167	0	0.0405445	1	4649	tags=39%, list=15%, signal=46%
GSE14769_40MIN_VS_360MIN_LPS_BMDM_UP	GSE14769_40MIN_VS_360MIN_LPS_BMDM_UP		191	-0.392028	-1.53124	0	0.0406511	1	4313	tags=40%, list=14%, signal=46%
GSE7852_LN_VS_THYMUS_TCONV_DN	GSE7852_LN_VS_THYMUS_TCONV_DN		181	-0.394955	-1.53098	0	0.0406886	1	4984	tags=42%, list=16%, signal=50%
REACTOME_ANTIGEN_PROCESSING_CROSS_PRESENTATION	REACTOME_ANTIGEN_PROCESSING_CROSS_PRESENTATION		70	-0.453071	-1.53088	0.00706714	0.0406919	1	4838	tags=47%, list=15%, signal=56%
G_PROTEIN_SIGNALING_COUPLED_TO_IP3_SECOND_MESSENGERPHOSPHOLIPASE_C_ACTIVATING	G_PROTEIN_SIGNALING_COUPLED_TO_IP3_SECOND_MESSENGERPHOSPHOLIPASE_C_ACTIVATING		34	-0.517545	-1.53039	0.0364146	0.0408079	1	3110	tags=29%, list=10%, signal=33%
GSE23984_CTRL_VS_HYPOCALEMIC_VITAMIND_ANALOG_TCELL_UP	GSE23984_CTRL_VS_HYPOCALEMIC_VITAMIND_ANALOG_TCELL_UP		185	-0.399898	-1.53022	0	0.0408357	1	4947	tags=37%, list=16%, signal=44%
REACTOME_RNA_POL_III_TRANSCRIPTION_INITIATION_FROM_TYPE_3_PROMOTER	REACTOME_RNA_POL_III_TRANSCRIPTION_INITIATION_FROM_TYPE_3_PROMOTER		26	-0.558958	-1.52976	0.026738	0.0409781	1	4633	tags=46%, list=15%, signal=54%
BOYLAN_MULTIPLE_MYELOMA_C_CLUSTER_UP	BOYLAN_MULTIPLE_MYELOMA_C_CLUSTER_UP		36	-0.510574	-1.52966	0.02849	0.0409827	1	5580	tags=44%, list=18%, signal=54%
PETROVA_PROX1_TARGETS_UP	PETROVA_PROX1_TARGETS_UP		24	-0.56774	-1.52955	0.0222222	0.0409874	1	2823	tags=42%, list=9%, signal=46%
GSE5503_LIVER_DC_VS_PLN_DC_ACTIVATED_ALLOGENIC_TCELL_DN	GSE5503_LIVER_DC_VS_PLN_DC_ACTIVATED_ALLOGENIC_TCELL_DN		191	-0.391823	-1.5288	0	0.0411836	1	4801	tags=40%, list=15%, signal=47%
GSE32901_TH1_VS_TH17_ENRICHED_CD4_TCELL_DN	GSE32901_TH1_VS_TH17_ENRICHED_CD4_TCELL_DN		141	-0.407752	-1.52876	0	0.041166	1	4161	tags=35%, list=13%, signal=41%
YOKOE_CANCER_TESTIS_ANTIGENS	YOKOE_CANCER_TESTIS_ANTIGENS		30	-0.533562	-1.52868	0.0276243	0.0411665	1	4236	tags=43%, list=13%, signal=50%
REACTOME_CHROMOSOME_MAINTENANCE	REACTOME_CHROMOSOME_MAINTENANCE		111	-0.413697	-1.52836	0.00392157	0.041238	1	5825	tags=54%, list=19%, signal=66%
GSE17721_PAM3CSK4_VS_CPG_8H_BMDM_UP	GSE17721_PAM3CSK4_VS_CPG_8H_BMDM_UP		181	-0.392939	-1.52819	0.00505051	0.041253	1	4557	tags=37%, list=14%, signal=43%
GSE18281_SUBCAPSULAR_VS_CENTRAL_CORTICAL_REGION_OF_THYMUS_UP	GSE18281_SUBCAPSULAR_VS_CENTRAL_CORTICAL_REGION_OF_THYMUS_UP		171	-0.394864	-1.52729	0	0.0415327	1	2979	tags=31%, list=9%, signal=34%
RESPONSE_TO_DNA_DAMAGE_STIMULUS	RESPONSE_TO_DNA_DAMAGE_STIMULUS		156	-0.409303	-1.52645	0	0.0417892	1	5445	tags=48%, list=17%, signal=58%
CHROMATIN_BINDING	CHROMATIN_BINDING		30	-0.545002	-1.52605	0.0292398	0.0418906	1	4086	tags=57%, list=13%, signal=65%
GSE14769_20MIN_VS_360MIN_LPS_BMDM_UP	GSE14769_20MIN_VS_360MIN_LPS_BMDM_UP		189	-0.390926	-1.52552	0	0.0420298	1	3782	tags=33%, list=12%, signal=37%
GSE5960_TH1_VS_ANERGIC_TH1_UP	GSE5960_TH1_VS_ANERGIC_TH1_UP		184	-0.391664	-1.52489	0	0.0422188	1	2126	tags=26%, list=7%, signal=27%
GSE8921_UNSTIM_VS_TLR1_2_STIM_MONOCYTE_24H_DN	GSE8921_UNSTIM_VS_TLR1_2_STIM_MONOCYTE_24H_DN		177	-0.398677	-1.5245	0	0.0423231	1	4376	tags=35%, list=14%, signal=40%
GSE11924_TFH_VS_TH2_CD4_TCELL_DN	GSE11924_TFH_VS_TH2_CD4_TCELL_DN		174	-0.393803	-1.52411	0	0.0424135	1	6414	tags=43%, list=20%, signal=53%
GSE21380_TFH_VS_GERMINAL_CENTER_TFH_CD4_TCELL_DN	GSE21380_TFH_VS_GERMINAL_CENTER_TFH_CD4_TCELL_DN		179	-0.395121	-1.52374	0	0.0425105	1	6504	tags=46%, list=21%, signal=57%
V$USF_C	V$USF_C		247	-0.379159	-1.52368	0	0.0424988	1	4315	tags=36%, list=14%, signal=41%
GSE37301_COMMON_LYMPHOID_PROGENITOR_VS_GRAN_MONO_PROGENITOR_UP	GSE37301_COMMON_LYMPHOID_PROGENITOR_VS_GRAN_MONO_PROGENITOR_UP		174	-0.395315	-1.52259	0.00483092	0.0428	1	2889	tags=35%, list=9%, signal=38%
NUCLEAR_DNA_DIRECTED_RNA_POLYMERASE_COMPLEX	NUCLEAR_DNA_DIRECTED_RNA_POLYMERASE_COMPLEX		17	-0.590016	-1.52241	0.0476191	0.0428373	1	3870	tags=41%, list=12%, signal=47%
REACTOME_PYRIMIDINE_METABOLISM	REACTOME_PYRIMIDINE_METABOLISM		22	-0.584248	-1.52154	0.0389972	0.0430934	1	2233	tags=36%, list=7%, signal=39%
GUO_TARGETS_OF_IRS1_AND_IRS2	GUO_TARGETS_OF_IRS1_AND_IRS2		89	-0.43571	-1.52076	0	0.0433371	1	2348	tags=34%, list=7%, signal=36%
REPLICATION_FORK	REPLICATION_FORK		18	-0.607452	-1.52008	0.0348525	0.0435619	1	3439	tags=61%, list=11%, signal=69%
LI_ADIPOGENESIS_BY_ACTIVATED_PPARG	LI_ADIPOGENESIS_BY_ACTIVATED_PPARG		16	-0.607152	-1.51977	0.0389294	0.0436145	1	2732	tags=31%, list=9%, signal=34%
GSE11961_MARGINAL_ZONE_BCELL_VS_PLASMA_CELL_DAY7_DN	GSE11961_MARGINAL_ZONE_BCELL_VS_PLASMA_CELL_DAY7_DN		176	-0.392017	-1.51912	0	0.04381	1	4797	tags=38%, list=15%, signal=44%
GSE23505_IL6_IL1_VS_IL6_IL1_IL23_TREATED_CD4_TCELL_UP	GSE23505_IL6_IL1_VS_IL6_IL1_IL23_TREATED_CD4_TCELL_UP		177	-0.400771	-1.51902	0.00471698	0.0438133	1	4322	tags=40%, list=14%, signal=46%
RESPONSE_TO_ENDOGENOUS_STIMULUS	RESPONSE_TO_ENDOGENOUS_STIMULUS		187	-0.393023	-1.51818	0	0.04407	1	4636	tags=41%, list=15%, signal=47%
GSE26030_TH1_VS_TH17_DAY5_POST_POLARIZATION_DN	GSE26030_TH1_VS_TH17_DAY5_POST_POLARIZATION_DN		185	-0.393266	-1.51816	0	0.0440484	1	4372	tags=38%, list=14%, signal=44%
GSE27786_CD8_TCELL_VS_NKCELL_UP	GSE27786_CD8_TCELL_VS_NKCELL_UP		184	-0.392691	-1.51811	0	0.0440404	1	4009	tags=33%, list=13%, signal=37%
GSE37532_TREG_VS_TCONV_CD4_TCELL_FROM_VISCERAL_ADIPOSE_TISSUE_DN	GSE37532_TREG_VS_TCONV_CD4_TCELL_FROM_VISCERAL_ADIPOSE_TISSUE_DN		161	-0.398657	-1.51764	0	0.0441682	1	4444	tags=38%, list=14%, signal=44%
GSE37301_MULTIPOTENT_PROGENITOR_VS_RAG2_KO_NK_CELL_DN	GSE37301_MULTIPOTENT_PROGENITOR_VS_RAG2_KO_NK_CELL_DN		190	-0.38663	-1.51627	0	0.04461	1	5083	tags=35%, list=16%, signal=42%
LINDGREN_BLADDER_CANCER_CLUSTER_1_DN	LINDGREN_BLADDER_CANCER_CLUSTER_1_DN		349	-0.369762	-1.51606	0	0.0446571	1	4635	tags=39%, list=15%, signal=45%
WHITFIELD_CELL_CYCLE_G2_M	WHITFIELD_CELL_CYCLE_G2_M		203	-0.395451	-1.51594	0	0.0446737	1	4113	tags=42%, list=13%, signal=48%
GSE11864_CSF1_PAM3CYS_VS_CSF1_IFNG_PAM3CYS_IN_MAC_UP	GSE11864_CSF1_PAM3CYS_VS_CSF1_IFNG_PAM3CYS_IN_MAC_UP		165	-0.395099	-1.5155	0	0.0448037	1	4480	tags=35%, list=14%, signal=40%
GSE36392_TYPE_2_MYELOID_VS_NEUTROPHIL_IL25_TREATED_LUNG_DN	GSE36392_TYPE_2_MYELOID_VS_NEUTROPHIL_IL25_TREATED_LUNG_DN		186	-0.398827	-1.51525	0	0.0448695	1	2932	tags=31%, list=9%, signal=34%
GSE17721_0.5H_VS_12H_CPG_BMDM_UP	GSE17721_0.5H_VS_12H_CPG_BMDM_UP		189	-0.393262	-1.51502	0	0.0449186	1	4435	tags=42%, list=14%, signal=48%
GSE17721_LPS_VS_POLYIC_24H_BMDM_UP	GSE17721_LPS_VS_POLYIC_24H_BMDM_UP		189	-0.39222	-1.51458	0	0.0450396	1	5670	tags=41%, list=18%, signal=49%
GSE24634_TREG_VS_TCONV_POST_DAY10_IL4_CONVERSION_UP	GSE24634_TREG_VS_TCONV_POST_DAY10_IL4_CONVERSION_UP		196	-0.392153	-1.51423	0	0.0451389	1	5032	tags=47%, list=16%, signal=56%
CHEN_ETV5_TARGETS_TESTIS	CHEN_ETV5_TARGETS_TESTIS		17	-0.597695	-1.51415	0.0414634	0.0451428	1	1886	tags=41%, list=6%, signal=44%
CHR2Q36	CHR2Q36		32	-0.529535	-1.51412	0.0163934	0.0451229	1	3927	tags=31%, list=12%, signal=36%
GSE2128_C57BL6_VS_NOD_THYMOCYTE_UP	GSE2128_C57BL6_VS_NOD_THYMOCYTE_UP		186	-0.391259	-1.51388	0	0.0451733	1	4939	tags=42%, list=16%, signal=49%
GSE21670_STAT3_KO_VS_WT_CD4_TCELL_TGFB_TREATED_UP	GSE21670_STAT3_KO_VS_WT_CD4_TCELL_TGFB_TREATED_UP		190	-0.387374	-1.51383	0	0.0451623	1	4678	tags=39%, list=15%, signal=45%
GARGALOVIC_RESPONSE_TO_OXIDIZED_PHOSPHOLIPIDS_GREY_UP	GARGALOVIC_RESPONSE_TO_OXIDIZED_PHOSPHOLIPIDS_GREY_UP		16	-0.606114	-1.51367	0.0477454	0.045199	1	232	tags=25%, list=1%, signal=25%
RNA_DEPENDENT_ATPASE_ACTIVITY	RNA_DEPENDENT_ATPASE_ACTIVITY		18	-0.592932	-1.51362	0.040201	0.0451887	1	4508	tags=44%, list=14%, signal=52%
GSE1112_OT1_VS_HY_CD8AB_THYMOCYTE_RTOC_CULTURE_UP	GSE1112_OT1_VS_HY_CD8AB_THYMOCYTE_RTOC_CULTURE_UP		178	-0.395129	-1.51335	0.00534759	0.0452507	1	3648	tags=31%, list=12%, signal=35%
FUNG_IL2_SIGNALING_1	FUNG_IL2_SIGNALING_1		11	-0.685294	-1.51319	0.0328638	0.0452816	1	340	tags=36%, list=1%, signal=37%
WALLACE_PROSTATE_CANCER_UP	WALLACE_PROSTATE_CANCER_UP		20	-0.579363	-1.51289	0.0398936	0.0453582	1	1376	tags=30%, list=4%, signal=31%
DNA_POLYMERASE_ACTIVITY	DNA_POLYMERASE_ACTIVITY		18	-0.592736	-1.51278	0.0339426	0.0453573	1	2096	tags=50%, list=7%, signal=54%
HALLMARK_ESTROGEN_RESPONSE_LATE	HALLMARK_ESTROGEN_RESPONSE_LATE		178	-0.394298	-1.51249	0	0.0454405	1	3064	tags=29%, list=10%, signal=32%
V$NMYC_01	V$NMYC_01		250	-0.377145	-1.5121	0	0.0455551	1	3749	tags=31%, list=12%, signal=35%
CHEN_HOXA5_TARGETS_9HR_DN	CHEN_HOXA5_TARGETS_9HR_DN		38	-0.508558	-1.51143	0.0213415	0.045754	1	4869	tags=45%, list=15%, signal=53%
REACTOME_DESTABILIZATION_OF_MRNA_BY_TRISTETRAPROLIN_TTP	REACTOME_DESTABILIZATION_OF_MRNA_BY_TRISTETRAPROLIN_TTP		17	-0.605427	-1.51089	0.0343008	0.045923	1	4829	tags=53%, list=15%, signal=63%
GSE12963_ENV_NEF_VS_ENV_NEF_AND_VPR_DEFICIENT_HIV1_INF_CD4_TCELL_DN	GSE12963_ENV_NEF_VS_ENV_NEF_AND_VPR_DEFICIENT_HIV1_INF_CD4_TCELL_DN		127	-0.407729	-1.51082	0	0.0459107	1	3870	tags=35%, list=12%, signal=40%
GSE8685_IL2_STARVED_VS_IL2_ACT_IL2_STARVED_CD4_TCELL_DN	GSE8685_IL2_STARVED_VS_IL2_ACT_IL2_STARVED_CD4_TCELL_DN		192	-0.389723	-1.51067	0	0.0459355	1	4562	tags=41%, list=15%, signal=48%
GSE1740_UNSTIM_VS_IFNA_STIMULATED_MCSF_IFNG_DERIVED_MACROPHAGE_DN	GSE1740_UNSTIM_VS_IFNA_STIMULATED_MCSF_IFNG_DERIVED_MACROPHAGE_DN		175	-0.39108	-1.5104	0	0.0459951	1	4056	tags=34%, list=13%, signal=38%
REACTOME_METABOLISM_OF_POLYAMINES	REACTOME_METABOLISM_OF_POLYAMINES		15	-0.618023	-1.51029	0.05	0.045997	1	5752	tags=67%, list=18%, signal=82%
MODULE_118	MODULE_118		369	-0.3636	-1.51025	0	0.0459777	1	3428	tags=33%, list=11%, signal=37%
MODULE_83	MODULE_83		310	-0.370879	-1.50997	0	0.0460482	1	6134	tags=41%, list=20%, signal=51%
PODAR_RESPONSE_TO_ADAPHOSTIN_DN	PODAR_RESPONSE_TO_ADAPHOSTIN_DN		18	-0.600936	-1.50951	0.0308789	0.0461833	1	1756	tags=44%, list=6%, signal=47%
GSE4748_CTRL_VS_CYANOBACTERIUM_LPSLIKE_STIM_DC_3H_DN	GSE4748_CTRL_VS_CYANOBACTERIUM_LPSLIKE_STIM_DC_3H_DN		190	-0.384769	-1.50868	0	0.046442	1	5025	tags=45%, list=16%, signal=53%
GSE22886_NAIVE_CD4_TCELL_VS_NEUTROPHIL_UP	GSE22886_NAIVE_CD4_TCELL_VS_NEUTROPHIL_UP		192	-0.389983	-1.50817	0	0.0466121	1	3685	tags=35%, list=12%, signal=39%
ZUCCHI_METASTASIS_UP	ZUCCHI_METASTASIS_UP		37	-0.506556	-1.50807	0.0216802	0.0466057	1	3941	tags=43%, list=13%, signal=49%
GARGALOVIC_RESPONSE_TO_OXIDIZED_PHOSPHOLIPIDS_RED_UP	GARGALOVIC_RESPONSE_TO_OXIDIZED_PHOSPHOLIPIDS_RED_UP		17	-0.605291	-1.50722	0.0421546	0.0469079	1	5445	tags=65%, list=17%, signal=78%
HALLMARK_SPERMATOGENESIS	HALLMARK_SPERMATOGENESIS		107	-0.414319	-1.50695	0.00429185	0.0469744	1	3375	tags=28%, list=11%, signal=31%
TONG_INTERACT_WITH_PTTG1	TONG_INTERACT_WITH_PTTG1		57	-0.468013	-1.50676	0.00591716	0.0470196	1	5677	tags=47%, list=18%, signal=58%
SERVITJA_LIVER_HNF1A_TARGETS_UP	SERVITJA_LIVER_HNF1A_TARGETS_UP		120	-0.410827	-1.50652	0	0.0470756	1	4017	tags=41%, list=13%, signal=47%
BHAT_ESR1_TARGETS_NOT_VIA_AKT1_UP	BHAT_ESR1_TARGETS_NOT_VIA_AKT1_UP		188	-0.38808	-1.50582	0	0.0472935	1	3699	tags=34%, list=12%, signal=38%
DNA_DIRECTED_RNA_POLYMERASE_COMPLEX	DNA_DIRECTED_RNA_POLYMERASE_COMPLEX		17	-0.590016	-1.50539	0.0483461	0.0474159	1	3870	tags=41%, list=12%, signal=47%
GSE24142_ADULT_VS_FETAL_DN2_THYMOCYTE_DN	GSE24142_ADULT_VS_FETAL_DN2_THYMOCYTE_DN		182	-0.392696	-1.50529	0	0.0474223	1	4027	tags=32%, list=13%, signal=36%
GSE22601_DOUBLE_POSITIVE_VS_CD8_SINGLE_POSITIVE_THYMOCYTE_DN	GSE22601_DOUBLE_POSITIVE_VS_CD8_SINGLE_POSITIVE_THYMOCYTE_DN		191	-0.389025	-1.50515	0	0.0474515	1	5581	tags=47%, list=18%, signal=56%
GSE22886_IGM_MEMORY_BCELL_VS_BLOOD_PLASMA_CELL_DN	GSE22886_IGM_MEMORY_BCELL_VS_BLOOD_PLASMA_CELL_DN		191	-0.386924	-1.50506	0	0.0474518	1	5871	tags=45%, list=19%, signal=55%
PID_E2F_PATHWAY	PID_E2F_PATHWAY		73	-0.445497	-1.50468	0.00380228	0.0475557	1	2935	tags=40%, list=9%, signal=44%
LI_CYTIDINE_ANALOG_PATHWAY	LI_CYTIDINE_ANALOG_PATHWAY		15	-0.620646	-1.50396	0.0467532	0.0477795	1	3280	tags=40%, list=10%, signal=45%
GOERING_BLOOD_HDL_CHOLESTEROL_QTL_TRANS	GOERING_BLOOD_HDL_CHOLESTEROL_QTL_TRANS		10	-0.706122	-1.50339	0.0517647	0.0479691	1	1067	tags=20%, list=3%, signal=21%
OUTER_MEMBRANE	OUTER_MEMBRANE		25	-0.540019	-1.50294	0.0352304	0.0480967	1	5811	tags=52%, list=18%, signal=64%
CAIRO_PML_TARGETS_BOUND_BY_MYC_UP	CAIRO_PML_TARGETS_BOUND_BY_MYC_UP		23	-0.568045	-1.50287	0.026738	0.0480956	1	4427	tags=61%, list=14%, signal=71%
GSE40273_GATA1_KO_VS_WT_TREG_UP	GSE40273_GATA1_KO_VS_WT_TREG_UP		188	-0.384693	-1.50269	0	0.0481319	1	4795	tags=39%, list=15%, signal=46%
GSE17974_0H_VS_2H_IN_VITRO_ACT_CD4_TCELL_DN	GSE17974_0H_VS_2H_IN_VITRO_ACT_CD4_TCELL_DN		182	-0.386593	-1.50263	0	0.0481153	1	3847	tags=34%, list=12%, signal=39%
GSE14308_TH1_VS_NAIVE_CD4_TCELL_UP	GSE14308_TH1_VS_NAIVE_CD4_TCELL_UP		179	-0.391117	-1.50155	0	0.0484707	1	5319	tags=41%, list=17%, signal=49%
GSE22935_WT_VS_MYD88_KO_MACROPHAGE_24H_MBOVIS_BCG_STIM_UP	GSE22935_WT_VS_MYD88_KO_MACROPHAGE_24H_MBOVIS_BCG_STIM_UP		186	-0.393197	-1.50148	0	0.0484711	1	4567	tags=39%, list=15%, signal=45%
RESPONSE_TO_ORGANIC_SUBSTANCE	RESPONSE_TO_ORGANIC_SUBSTANCE		25	-0.544916	-1.50146	0.0387812	0.0484513	1	2081	tags=36%, list=7%, signal=39%
DNA_DEPENDENT_ATPASE_ACTIVITY	DNA_DEPENDENT_ATPASE_ACTIVITY		22	-0.566246	-1.50137	0.0380435	0.0484454	1	4508	tags=50%, list=14%, signal=58%
GSE6092_UNSTIM_VS_IFNG_STIM_ENDOTHELIAL_CELL_UP	GSE6092_UNSTIM_VS_IFNG_STIM_ENDOTHELIAL_CELL_UP		192	-0.387093	-1.50129	0	0.0484549	1	5108	tags=41%, list=16%, signal=48%
REACTOME_SULFUR_AMINO_ACID_METABOLISM	REACTOME_SULFUR_AMINO_ACID_METABOLISM		24	-0.560417	-1.5008	0.0353261	0.0486149	1	4363	tags=46%, list=14%, signal=53%
GSE41867_DAY8_EFFECTOR_VS_DAY30_EXHAUSTED_CD8_TCELL_LCMV_CLONE13_UP	GSE41867_DAY8_EFFECTOR_VS_DAY30_EXHAUSTED_CD8_TCELL_LCMV_CLONE13_UP		192	-0.384102	-1.50075	0	0.0486019	1	5414	tags=45%, list=17%, signal=54%
GSE17721_CPG_VS_GARDIQUIMOD_1H_BMDM_DN	GSE17721_CPG_VS_GARDIQUIMOD_1H_BMDM_DN		192	-0.383191	-1.50011	0	0.048778	1	5471	tags=37%, list=17%, signal=44%
HALLMARK_DNA_REPAIR	HALLMARK_DNA_REPAIR		142	-0.40445	-1.50007	0.00448431	0.0487634	1	4663	tags=39%, list=15%, signal=45%
ZHAN_MULTIPLE_MYELOMA_CD2_DN	ZHAN_MULTIPLE_MYELOMA_CD2_DN		43	-0.49364	-1.49993	0.0251572	0.0487789	1	3908	tags=49%, list=12%, signal=56%
GSE21033_3H_VS_24H_POLYIC_STIM_DC_DN	GSE21033_3H_VS_24H_POLYIC_STIM_DC_DN		118	-0.407898	-1.49991	0	0.0487528	1	4506	tags=42%, list=14%, signal=48%
GSE5455_EX_VIVO_VS_POST_24H_INCUBATION_MONOCYTES_FROM_TUMOR_BEARING_MOUSE_UP	GSE5455_EX_VIVO_VS_POST_24H_INCUBATION_MONOCYTES_FROM_TUMOR_BEARING_MOUSE_UP		183	-0.390659	-1.49941	0	0.0489002	1	3538	tags=36%, list=11%, signal=40%
CARBOHYDRATE_BINDING	CARBOHYDRATE_BINDING		56	-0.463666	-1.49883	0.0107143	0.049092	1	2222	tags=20%, list=7%, signal=21%
GSE46143_CTRL_VS_LMP2A_TRANSDUCED_CD10_POS_GC_BCELL_UP	GSE46143_CTRL_VS_LMP2A_TRANSDUCED_CD10_POS_GC_BCELL_UP		181	-0.385214	-1.49756	0	0.0494996	1	5630	tags=42%, list=18%, signal=51%
REACTOME_ACTIVATION_OF_CHAPERONES_BY_ATF6_ALPHA	REACTOME_ACTIVATION_OF_CHAPERONES_BY_ATF6_ALPHA		12	-0.665185	-1.49715	0.0484262	0.049638	1	3352	tags=42%, list=11%, signal=47%
GSE14000_UNSTIM_VS_4H_LPS_DC_TRANSLATED_RNA_UP	GSE14000_UNSTIM_VS_4H_LPS_DC_TRANSLATED_RNA_UP		182	-0.391371	-1.49688	0	0.0496938	1	5574	tags=41%, list=18%, signal=49%
REACTOME_GLYCOLYSIS	REACTOME_GLYCOLYSIS		24	-0.544714	-1.49686	0.0357143	0.0496694	1	2880	tags=38%, list=9%, signal=41%
GSE17974_0H_VS_72H_IN_VITRO_ACT_CD4_TCELL_DN	GSE17974_0H_VS_72H_IN_VITRO_ACT_CD4_TCELL_DN		186	-0.384178	-1.49678	0	0.0496689	1	5630	tags=51%, list=18%, signal=62%
TRANSFERASE_ACTIVITY_TRANSFERRING_ALKYL_OR_ARYLOTHER_THAN_METHYLGROUPS	TRANSFERASE_ACTIVITY_TRANSFERRING_ALKYL_OR_ARYLOTHER_THAN_METHYLGROUPS		26	-0.541664	-1.49615	0.0350404	0.0498742	1	4231	tags=35%, list=13%, signal=40%
S_ADENOSYLMETHIONINE_DEPENDENT_METHYLTRANSFERASE_ACTIVITY	S_ADENOSYLMETHIONINE_DEPENDENT_METHYLTRANSFERASE_ACTIVITY		20	-0.569759	-1.49611	0.0431267	0.0498552	1	1948	tags=25%, list=6%, signal=27%
CROMER_METASTASIS_DN	CROMER_METASTASIS_DN		71	-0.439181	-1.49534	0.0174216	0.0500971	1	5108	tags=51%, list=16%, signal=60%
GSE3982_MAC_VS_TH1_DN	GSE3982_MAC_VS_TH1_DN		186	-0.38064	-1.49531	0	0.0500756	1	4780	tags=39%, list=15%, signal=46%
PETROVA_ENDOTHELIUM_LYMPHATIC_VS_BLOOD_UP	PETROVA_ENDOTHELIUM_LYMPHATIC_VS_BLOOD_UP		115	-0.409575	-1.4948	0.00406504	0.0502296	1	3389	tags=33%, list=11%, signal=37%
NUCLEAR_MATRIX	NUCLEAR_MATRIX		12	-0.658696	-1.49434	0.0485437	0.0503859	1	3331	tags=50%, list=11%, signal=56%
PHOSPHOINOSITIDE_MEDIATED_SIGNALING	PHOSPHOINOSITIDE_MEDIATED_SIGNALING		37	-0.501523	-1.49417	0.0247678	0.0504186	1	3110	tags=27%, list=10%, signal=30%
GSE17721_CTRL_VS_POLYIC_12H_BMDM_UP	GSE17721_CTRL_VS_POLYIC_12H_BMDM_UP		188	-0.390736	-1.49412	0	0.050397	1	5666	tags=43%, list=18%, signal=52%
GSE37301_HEMATOPOIETIC_STEM_CELL_VS_COMMON_LYMPHOID_PROGENITOR_UP	GSE37301_HEMATOPOIETIC_STEM_CELL_VS_COMMON_LYMPHOID_PROGENITOR_UP		159	-0.387001	-1.49405	0.00520833	0.0503944	1	3821	tags=29%, list=12%, signal=33%
GSE15330_WT_VS_IKAROS_KO_MEGAKARYOCYTE_ERYTHROID_PROGENITOR_UP	GSE15330_WT_VS_IKAROS_KO_MEGAKARYOCYTE_ERYTHROID_PROGENITOR_UP		186	-0.392068	-1.49384	0	0.0504477	1	3480	tags=32%, list=11%, signal=36%
GSE40277_EOS_AND_LEF1_TRANSDUCED_VS_CTRL_CD4_TCELL_DN	GSE40277_EOS_AND_LEF1_TRANSDUCED_VS_CTRL_CD4_TCELL_DN		189	-0.380489	-1.49351	0	0.0505633	1	3563	tags=35%, list=11%, signal=40%
GSE12003_4D_VS_8D_CULTURE_BM_PROGENITOR_UP	GSE12003_4D_VS_8D_CULTURE_BM_PROGENITOR_UP		146	-0.396091	-1.49332	0.0045045	0.0505959	1	3936	tags=40%, list=13%, signal=45%
GSE1925_CTRL_VS_IFNG_PRIMED_MACROPHAGE_DN	GSE1925_CTRL_VS_IFNG_PRIMED_MACROPHAGE_DN		185	-0.386352	-1.49196	0.00555556	0.0510984	1	4089	tags=35%, list=13%, signal=40%
REACTOME_DEFENSINS	REACTOME_DEFENSINS		10	-0.69285	-1.49117	0.0578704	0.0513644	1	171	tags=30%, list=1%, signal=30%
REGULATION_OF_DNA_METABOLIC_PROCESS	REGULATION_OF_DNA_METABOLIC_PROCESS		43	-0.479087	-1.49081	0.0268657	0.0514686	1	5574	tags=44%, list=18%, signal=54%
REACTOME_NUCLEOTIDE_LIKE_PURINERGIC_RECEPTORS	REACTOME_NUCLEOTIDE_LIKE_PURINERGIC_RECEPTORS		12	-0.644699	-1.49047	0.0522565	0.0515704	1	2656	tags=42%, list=8%, signal=45%
GSE28726_NAIVE_CD4_TCELL_VS_NAIVE_NKTCELL_UP	GSE28726_NAIVE_CD4_TCELL_VS_NAIVE_NKTCELL_UP		188	-0.383313	-1.4904	0	0.0515664	1	3980	tags=35%, list=13%, signal=40%
GSE3982_DC_VS_NEUTROPHIL_LPS_STIM_UP	GSE3982_DC_VS_NEUTROPHIL_LPS_STIM_UP		185	-0.384276	-1.49025	0	0.0515853	1	4193	tags=36%, list=13%, signal=41%
MORF_NME2	MORF_NME2		153	-0.39929	-1.4901	0	0.0516117	1	4171	tags=29%, list=13%, signal=33%
SHEPARD_BMYB_TARGETS	SHEPARD_BMYB_TARGETS		63	-0.44404	-1.49005	0.016835	0.0515994	1	4610	tags=48%, list=15%, signal=56%
GSE34156_NOD2_LIGAND_VS_TLR1_TLR2_LIGAND_24H_TREATED_MONOCYTE_DN	GSE34156_NOD2_LIGAND_VS_TLR1_TLR2_LIGAND_24H_TREATED_MONOCYTE_DN		174	-0.389985	-1.49001	0.00943396	0.0515863	1	4848	tags=40%, list=15%, signal=47%
REACTOME_VITAMIN_B5_PANTOTHENATE_METABOLISM	REACTOME_VITAMIN_B5_PANTOTHENATE_METABOLISM		11	-0.659643	-1.48853	0.0583942	0.0521278	1	4422	tags=64%, list=14%, signal=74%
PID_FOXM1_PATHWAY	PID_FOXM1_PATHWAY		39	-0.506459	-1.48822	0.0163488	0.0522132	1	4610	tags=54%, list=15%, signal=63%
GSE18791_UNSTIM_VS_NEWCATSLE_VIRUS_DC_10H_UP	GSE18791_UNSTIM_VS_NEWCATSLE_VIRUS_DC_10H_UP		186	-0.383353	-1.4876	0	0.0524079	1	5172	tags=44%, list=16%, signal=52%
ORGANIC_ACID_TRANSPORT	ORGANIC_ACID_TRANSPORT		35	-0.495069	-1.4854	0.019943	0.0532365	1	3438	tags=49%, list=11%, signal=54%
CHR1P34	CHR1P34		144	-0.390351	-1.48419	0.00505051	0.0536873	1	4951	tags=37%, list=16%, signal=43%
GENTILE_UV_RESPONSE_CLUSTER_D9	GENTILE_UV_RESPONSE_CLUSTER_D9		24	-0.542655	-1.48419	0.0388889	0.0536533	1	2577	tags=38%, list=8%, signal=41%
GSE369_SOCS3_KO_VS_WT_LIVER_POST_IL6_INJECTION_UP	GSE369_SOCS3_KO_VS_WT_LIVER_POST_IL6_INJECTION_UP		172	-0.384211	-1.48186	0	0.0546	1	5010	tags=41%, list=16%, signal=48%
GSE22886_DC_VS_MONOCYTE_UP	GSE22886_DC_VS_MONOCYTE_UP		184	-0.38109	-1.48148	0	0.0547189	1	3697	tags=38%, list=12%, signal=43%
GSE20198_UNTREATED_VS_IFNA_TREATED_ACT_CD4_TCELL_DN	GSE20198_UNTREATED_VS_IFNA_TREATED_ACT_CD4_TCELL_DN		187	-0.379348	-1.48119	0	0.0548148	1	5085	tags=41%, list=16%, signal=48%
GSE27786_LIN_NEG_VS_NEUTROPHIL_UP	GSE27786_LIN_NEG_VS_NEUTROPHIL_UP		183	-0.38587	-1.48055	0	0.0550305	1	4688	tags=33%, list=15%, signal=38%
RAMALHO_STEMNESS_UP	RAMALHO_STEMNESS_UP		200	-0.382904	-1.48027	0	0.0551058	1	4358	tags=38%, list=14%, signal=44%
CACGTG_V$MYC_Q2	CACGTG_V$MYC_Q2		930	-0.341644	-1.47955	0	0.0553713	1	4684	tags=34%, list=15%, signal=38%
MITOCHONDRIAL_RESPIRATORY_CHAIN	MITOCHONDRIAL_RESPIRATORY_CHAIN		23	-0.550675	-1.47915	0.0424929	0.0555025	1	5225	tags=48%, list=17%, signal=57%
LANG_MYB_FAMILY_TARGETS	LANG_MYB_FAMILY_TARGETS		29	-0.513745	-1.47914	0.0374332	0.0554713	1	2642	tags=41%, list=8%, signal=45%
GSE17721_PAM3CSK4_VS_GADIQUIMOD_12H_BMDM_UP	GSE17721_PAM3CSK4_VS_GADIQUIMOD_12H_BMDM_UP		182	-0.382231	-1.47904	0	0.0554755	1	3987	tags=32%, list=13%, signal=37%
V$E2F_01	V$E2F_01		66	-0.437078	-1.47789	0.0105263	0.0559002	1	3428	tags=36%, list=11%, signal=41%
HADDAD_T_LYMPHOCYTE_AND_NK_PROGENITOR_DN	HADDAD_T_LYMPHOCYTE_AND_NK_PROGENITOR_DN		58	-0.449728	-1.47724	0.00996678	0.0561422	1	1942	tags=33%, list=6%, signal=35%
GSE17721_CTRL_VS_PAM3CSK4_24H_BMDM_DN	GSE17721_CTRL_VS_PAM3CSK4_24H_BMDM_DN		179	-0.389185	-1.47685	0	0.0562569	1	4341	tags=35%, list=14%, signal=40%
GSE2706_UNSTIM_VS_8H_LPS_AND_R848_DC_UP	GSE2706_UNSTIM_VS_8H_LPS_AND_R848_DC_UP		186	-0.382362	-1.47632	0	0.0564591	1	4491	tags=38%, list=14%, signal=44%
NUCLEOBASENUCLEOSIDE_AND_NUCLEOTIDE_METABOLIC_PROCESS	NUCLEOBASENUCLEOSIDE_AND_NUCLEOTIDE_METABOLIC_PROCESS		49	-0.472567	-1.47615	0.0122324	0.0564955	1	5118	tags=43%, list=16%, signal=51%
GSE12366_GC_VS_MEMORY_BCELL_UP	GSE12366_GC_VS_MEMORY_BCELL_UP		183	-0.378967	-1.47583	0	0.0565924	1	5132	tags=43%, list=16%, signal=51%
GSE17721_POLYIC_VS_PAM3CSK4_24H_BMDM_DN	GSE17721_POLYIC_VS_PAM3CSK4_24H_BMDM_DN		190	-0.381772	-1.47504	0	0.0568907	1	3087	tags=32%, list=10%, signal=35%
GSE44649_NAIVE_VS_ACTIVATED_CD8_TCELL_MIR155_KO_UP	GSE44649_NAIVE_VS_ACTIVATED_CD8_TCELL_MIR155_KO_UP		192	-0.382681	-1.47386	0	0.0573288	1	4119	tags=34%, list=13%, signal=39%
GSE36888_STAT5_AB_KNOCKIN_VS_WT_TCELL_IL2_TREATED_6H_DN	GSE36888_STAT5_AB_KNOCKIN_VS_WT_TCELL_IL2_TREATED_6H_DN		191	-0.381003	-1.47359	0	0.0573959	1	3942	tags=34%, list=13%, signal=39%
YUAN_ZNF143_PARTNERS	YUAN_ZNF143_PARTNERS		21	-0.542535	-1.47317	0.0511509	0.0575213	1	1610	tags=29%, list=5%, signal=30%
SMID_BREAST_CANCER_RELAPSE_IN_BRAIN_UP	SMID_BREAST_CANCER_RELAPSE_IN_BRAIN_UP		29	-0.530371	-1.47303	0.0245232	0.0575278	1	6141	tags=48%, list=20%, signal=60%
SHEPARD_BMYB_MORPHOLINO_DN	SHEPARD_BMYB_MORPHOLINO_DN		174	-0.385134	-1.47266	0	0.0576341	1	4610	tags=39%, list=15%, signal=46%
GSE36476_YOUNG_VS_OLD_DONOR_MEMORY_CD4_TCELL_16H_TSST_ACT_UP	GSE36476_YOUNG_VS_OLD_DONOR_MEMORY_CD4_TCELL_16H_TSST_ACT_UP		158	-0.386067	-1.47248	0	0.057666	1	4266	tags=31%, list=14%, signal=36%
ENDONUCLEASE_ACTIVITY	ENDONUCLEASE_ACTIVITY		24	-0.549784	-1.47206	0.0659631	0.0577998	1	4756	tags=67%, list=15%, signal=78%
ELECTRON_TRANSPORT_GO_0006118	ELECTRON_TRANSPORT_GO_0006118		49	-0.470321	-1.47195	0.0170455	0.0578114	1	3710	tags=33%, list=12%, signal=37%
IWANAGA_E2F1_TARGETS_INDUCED_BY_SERUM	IWANAGA_E2F1_TARGETS_INDUCED_BY_SERUM		30	-0.521756	-1.47173	0.0308123	0.057863	1	6724	tags=57%, list=21%, signal=72%
GSE27786_LIN_NEG_VS_BCELL_UP	GSE27786_LIN_NEG_VS_BCELL_UP		173	-0.386403	-1.47128	0	0.0580076	1	4748	tags=40%, list=15%, signal=47%
GSE17721_LPS_VS_CPG_6H_BMDM_DN	GSE17721_LPS_VS_CPG_6H_BMDM_DN		187	-0.378018	-1.47123	0	0.0579982	1	4114	tags=34%, list=13%, signal=39%
ATPASE_ACTIVITY	ATPASE_ACTIVITY		111	-0.406798	-1.47093	0.00873363	0.0580733	1	4795	tags=34%, list=15%, signal=40%
NIKOLSKY_BREAST_CANCER_11Q12_Q14_AMPLICON	NIKOLSKY_BREAST_CANCER_11Q12_Q14_AMPLICON		132	-0.39312	-1.47065	0	0.0581514	1	2570	tags=22%, list=8%, signal=24%
GSE16385_MONOCYTE_VS_12H_ROSIGLITAZONE_TREATED_MACROPHAGE_DN	GSE16385_MONOCYTE_VS_12H_ROSIGLITAZONE_TREATED_MACROPHAGE_DN		191	-0.382352	-1.47056	0.00512821	0.058142	1	5015	tags=40%, list=16%, signal=47%
GSE3982_NEUTROPHIL_VS_CENT_MEMORY_CD4_TCELL_DN	GSE3982_NEUTROPHIL_VS_CENT_MEMORY_CD4_TCELL_DN		183	-0.379415	-1.47036	0	0.0581877	1	5085	tags=40%, list=16%, signal=48%
GSE3982_MAST_CELL_VS_TH1_DN	GSE3982_MAST_CELL_VS_TH1_DN		185	-0.378006	-1.46966	0	0.0584494	1	4610	tags=37%, list=15%, signal=43%
GSE45365_CD8A_DC_VS_CD11B_DC_UP	GSE45365_CD8A_DC_VS_CD11B_DC_UP		175	-0.384345	-1.46938	0	0.0585351	1	3438	tags=27%, list=11%, signal=30%
GSE22935_24H_VS_48H_MBOVIS_BCG_STIM_MACROPHAGE_DN	GSE22935_24H_VS_48H_MBOVIS_BCG_STIM_MACROPHAGE_DN		188	-0.37645	-1.46937	0.00510204	0.0585004	1	5322	tags=38%, list=17%, signal=46%
GSE36009_UNSTIM_VS_LPS_STIM_NLRP10_KO_DC_DN	GSE36009_UNSTIM_VS_LPS_STIM_NLRP10_KO_DC_DN		183	-0.372462	-1.46911	0.00476191	0.0585757	1	3700	tags=33%, list=12%, signal=38%
ENK_UV_RESPONSE_EPIDERMIS_UP	ENK_UV_RESPONSE_EPIDERMIS_UP		262	-0.366323	-1.46826	0	0.0589024	1	4752	tags=39%, list=15%, signal=45%
GSE17721_0.5H_VS_4H_LPS_BMDM_UP	GSE17721_0.5H_VS_4H_LPS_BMDM_UP		188	-0.381052	-1.46795	0	0.0589929	1	4430	tags=40%, list=14%, signal=46%
GAZDA_DIAMOND_BLACKFAN_ANEMIA_PROGENITOR_DN	GAZDA_DIAMOND_BLACKFAN_ANEMIA_PROGENITOR_DN		60	-0.454614	-1.46785	0.0325733	0.0590037	1	4214	tags=42%, list=13%, signal=48%
GSE17721_CTRL_VS_CPG_24H_BMDM_DN	GSE17721_CTRL_VS_CPG_24H_BMDM_DN		184	-0.382648	-1.46773	0	0.0590077	1	4168	tags=34%, list=13%, signal=39%
GSE17721_CTRL_VS_POLYIC_8H_BMDM_UP	GSE17721_CTRL_VS_POLYIC_8H_BMDM_UP		186	-0.381761	-1.46689	0	0.05932	1	4435	tags=36%, list=14%, signal=42%
GSE30962_ACUTE_VS_CHRONIC_LCMV_SECONDARY_INF_CD8_TCELL_DN	GSE30962_ACUTE_VS_CHRONIC_LCMV_SECONDARY_INF_CD8_TCELL_DN		189	-0.381288	-1.4667	0	0.0593671	1	3395	tags=39%, list=11%, signal=44%
NAKAMURA_METASTASIS	NAKAMURA_METASTASIS		43	-0.475149	-1.46624	0.0404984	0.0595232	1	2644	tags=30%, list=8%, signal=33%
WENG_POR_TARGETS_GLOBAL_DN	WENG_POR_TARGETS_GLOBAL_DN		22	-0.535353	-1.46609	0.0569106	0.0595608	1	3372	tags=41%, list=11%, signal=46%
GSE17721_CTRL_VS_POLYIC_4H_BMDM_UP	GSE17721_CTRL_VS_POLYIC_4H_BMDM_UP		186	-0.376828	-1.46594	0	0.0595896	1	4601	tags=42%, list=15%, signal=49%
CARBOHYDRATE_KINASE_ACTIVITY	CARBOHYDRATE_KINASE_ACTIVITY		14	-0.608513	-1.46594	0.0817942	0.0595529	1	3490	tags=57%, list=11%, signal=64%
GSE18791_UNSTIM_VS_NEWCATSLE_VIRUS_DC_6H_UP	GSE18791_UNSTIM_VS_NEWCATSLE_VIRUS_DC_6H_UP		184	-0.379341	-1.46547	0	0.059738	1	4135	tags=39%, list=13%, signal=44%
MOREIRA_RESPONSE_TO_TSA_UP	MOREIRA_RESPONSE_TO_TSA_UP		28	-0.533979	-1.46504	0.0343008	0.0598733	1	2290	tags=36%, list=7%, signal=38%
KIM_WT1_TARGETS_DN	KIM_WT1_TARGETS_DN		430	-0.348575	-1.46384	0	0.0603557	1	4225	tags=34%, list=13%, signal=39%
PID_MYC_PATHWAY	PID_MYC_PATHWAY		25	-0.530684	-1.46355	0.0521472	0.0604459	1	2920	tags=36%, list=9%, signal=40%
GSE39022_LN_VS_SPLEEN_DC_UP	GSE39022_LN_VS_SPLEEN_DC_UP		181	-0.377886	-1.46306	0.005291	0.0606147	1	4939	tags=39%, list=16%, signal=46%
GSE12003_4D_VS_8D_CULTURE_MIR223_KO_BM_PROGENITOR_UP	GSE12003_4D_VS_8D_CULTURE_MIR223_KO_BM_PROGENITOR_UP		118	-0.396678	-1.46299	0.0168067	0.0606185	1	3999	tags=28%, list=13%, signal=32%
MODULE_349	MODULE_349		16	-0.592924	-1.46255	0.0687023	0.060778	1	2522	tags=44%, list=8%, signal=48%
YANG_BREAST_CANCER_ESR1_LASER_DN	YANG_BREAST_CANCER_ESR1_LASER_DN		47	-0.45745	-1.46251	0.0269461	0.0607532	1	3230	tags=38%, list=10%, signal=43%
GSE17721_CTRL_VS_LPS_2H_BMDM_UP	GSE17721_CTRL_VS_LPS_2H_BMDM_UP		180	-0.372559	-1.46233	0	0.060792	1	5571	tags=41%, list=18%, signal=50%
GSE2770_TGFB_AND_IL4_VS_TGFB_AND_IL12_TREATED_ACT_CD4_TCELL_2H_DN	GSE2770_TGFB_AND_IL4_VS_TGFB_AND_IL12_TREATED_ACT_CD4_TCELL_2H_DN		178	-0.380363	-1.46213	0	0.0608617	1	5441	tags=42%, list=17%, signal=50%
RB_DN.V1_UP	RB_DN.V1_UP		126	-0.403496	-1.46181	0.00956938	0.0609708	1	3280	tags=36%, list=10%, signal=40%
SMALL_RIBOSOMAL_SUBUNIT	SMALL_RIBOSOMAL_SUBUNIT		11	-0.647248	-1.46175	0.0782396	0.0609548	1	3353	tags=64%, list=11%, signal=71%
GSE14308_TH1_VS_INDUCED_TREG_DN	GSE14308_TH1_VS_INDUCED_TREG_DN		174	-0.381142	-1.4617	0	0.0609387	1	4351	tags=36%, list=14%, signal=41%
HETEROCYCLE_METABOLIC_PROCESS	HETEROCYCLE_METABOLIC_PROCESS		22	-0.554216	-1.4617	0.0655738	0.0609022	1	5346	tags=59%, list=17%, signal=71%
ALCOHOL_METABOLIC_PROCESS	ALCOHOL_METABOLIC_PROCESS		75	-0.427991	-1.46144	0.0202703	0.0609766	1	4941	tags=35%, list=16%, signal=41%
MORF_RFC1	MORF_RFC1		106	-0.404969	-1.46141	0	0.0609518	1	4680	tags=38%, list=15%, signal=44%
RESPONSE_TO_OXIDATIVE_STRESS	RESPONSE_TO_OXIDATIVE_STRESS		42	-0.481732	-1.46132	0.014881	0.0609646	1	4035	tags=45%, list=13%, signal=52%
MODULE_186	MODULE_186		18	-0.582963	-1.46112	0.0588235	0.06103	1	1735	tags=28%, list=6%, signal=29%
AMINO_SUGAR_METABOLIC_PROCESS	AMINO_SUGAR_METABOLIC_PROCESS		17	-0.579022	-1.46104	0.0598958	0.0610334	1	2432	tags=41%, list=8%, signal=45%
CHICAS_RB1_TARGETS_SENESCENT	CHICAS_RB1_TARGETS_SENESCENT		520	-0.341619	-1.46102	0	0.0610115	1	4205	tags=34%, list=13%, signal=38%
GSE17721_CTRL_VS_LPS_24H_BMDM_DN	GSE17721_CTRL_VS_LPS_24H_BMDM_DN		187	-0.377184	-1.46062	0	0.0611544	1	6004	tags=42%, list=19%, signal=52%
GSE17721_PAM3CSK4_VS_CPG_6H_BMDM_UP	GSE17721_PAM3CSK4_VS_CPG_6H_BMDM_UP		189	-0.369239	-1.46013	0	0.0613252	1	5667	tags=41%, list=18%, signal=50%
FATTY_ACID_METABOLIC_PROCESS	FATTY_ACID_METABOLIC_PROCESS		57	-0.443235	-1.45997	0.0157729	0.0613582	1	1842	tags=23%, list=6%, signal=24%
GSE17721_CTRL_VS_POLYIC_2H_BMDM_UP	GSE17721_CTRL_VS_POLYIC_2H_BMDM_UP		178	-0.378496	-1.45987	0.00581395	0.0613629	1	4753	tags=34%, list=15%, signal=39%
GOLDRATH_ANTIGEN_RESPONSE	GOLDRATH_ANTIGEN_RESPONSE		322	-0.354243	-1.45954	0	0.0614747	1	3428	tags=34%, list=11%, signal=38%
CHR20P13	CHR20P13		59	-0.444153	-1.4592	0.0295082	0.0615909	1	3475	tags=31%, list=11%, signal=34%
TRANSLATIONAL_INITIATION	TRANSLATIONAL_INITIATION		36	-0.48686	-1.45823	0.0274725	0.0619891	1	6052	tags=50%, list=19%, signal=62%
RHYTHMIC_PROCESS	RHYTHMIC_PROCESS		20	-0.53961	-1.45822	0.0514139	0.0619617	1	3068	tags=45%, list=10%, signal=50%
RNA_POLYMERASE_COMPLEX	RNA_POLYMERASE_COMPLEX		17	-0.590016	-1.45805	0.052356	0.0620067	1	3870	tags=41%, list=12%, signal=47%
ESC_V6.5_UP_LATE.V1_DN	ESC_V6.5_UP_LATE.V1_DN		161	-0.386535	-1.45788	0	0.0620421	1	3242	tags=27%, list=10%, signal=30%
GSE11924_TFH_VS_TH1_CD4_TCELL_DN	GSE11924_TFH_VS_TH1_CD4_TCELL_DN		179	-0.375362	-1.45783	0	0.0620227	1	4959	tags=36%, list=16%, signal=42%
CHUNG_BLISTER_CYTOTOXICITY_UP	CHUNG_BLISTER_CYTOTOXICITY_UP		123	-0.39581	-1.45725	0.00896861	0.0622287	1	5657	tags=50%, list=18%, signal=60%
GSE21774_CD56_BRIGHT_VS_DIM_CD62L_POSITIVE_NK_CELL_DN	GSE21774_CD56_BRIGHT_VS_DIM_CD62L_POSITIVE_NK_CELL_DN		180	-0.383136	-1.4568	0	0.0623868	1	4719	tags=38%, list=15%, signal=45%
GSE17974_2H_VS_72H_UNTREATED_IN_VITRO_CD4_TCELL_DN	GSE17974_2H_VS_72H_UNTREATED_IN_VITRO_CD4_TCELL_DN		187	-0.373416	-1.45608	0.00578035	0.0626486	1	5126	tags=40%, list=16%, signal=47%
REACTOME_N_GLYCAN_TRIMMING_IN_THE_ER_AND_CALNEXIN_CALRETICULIN_CYCLE	REACTOME_N_GLYCAN_TRIMMING_IN_THE_ER_AND_CALNEXIN_CALRETICULIN_CYCLE		13	-0.622716	-1.45584	0.0852713	0.06271	1	3694	tags=54%, list=12%, signal=61%
GSE23505_IL6_IL1_VS_IL6_IL1_TGFB_TREATED_CD4_TCELL_DN	GSE23505_IL6_IL1_VS_IL6_IL1_TGFB_TREATED_CD4_TCELL_DN		190	-0.374573	-1.45557	0.0108696	0.0627843	1	5284	tags=45%, list=17%, signal=53%
GSE40666_NAIVE_VS_EFFECTOR_CD8_TCELL_WITH_IFNA_STIM_90MIN_DN	GSE40666_NAIVE_VS_EFFECTOR_CD8_TCELL_WITH_IFNA_STIM_90MIN_DN		180	-0.375206	-1.45542	0.00465116	0.0628168	1	3708	tags=34%, list=12%, signal=38%
BOYAULT_LIVER_CANCER_SUBCLASS_G2	BOYAULT_LIVER_CANCER_SUBCLASS_G2		26	-0.529441	-1.45491	0.0367232	0.0630198	1	3852	tags=38%, list=12%, signal=44%
GSE21360_PRIMARY_VS_SECONDARY_MEMORY_CD8_TCELL_UP	GSE21360_PRIMARY_VS_SECONDARY_MEMORY_CD8_TCELL_UP		170	-0.377124	-1.45481	0	0.0630285	1	4717	tags=31%, list=15%, signal=36%
GSE2770_IL4_ACT_VS_ACT_CD4_TCELL_2H_UP	GSE2770_IL4_ACT_VS_ACT_CD4_TCELL_2H_UP		188	-0.380637	-1.45463	0	0.0630782	1	4780	tags=41%, list=15%, signal=49%
GSE15330_HSC_VS_LYMPHOID_PRIMED_MULTIPOTENT_PROGENITOR_IKAROS_KO_DN	GSE15330_HSC_VS_LYMPHOID_PRIMED_MULTIPOTENT_PROGENITOR_IKAROS_KO_DN		180	-0.378126	-1.45439	0	0.0631442	1	4271	tags=33%, list=14%, signal=38%
CARBOXYLIC_ACID_TRANSPORT	CARBOXYLIC_ACID_TRANSPORT		35	-0.495069	-1.45397	0.0389972	0.0632958	1	3438	tags=49%, list=11%, signal=54%
HELLER_HDAC_TARGETS_DN	HELLER_HDAC_TARGETS_DN		272	-0.363359	-1.45311	0	0.0636304	1	2715	tags=31%, list=9%, signal=34%
GSE22033_UNTREATED_VS_ROSIGLITAZONE_TREATED_MEF_UP	GSE22033_UNTREATED_VS_ROSIGLITAZONE_TREATED_MEF_UP		189	-0.373473	-1.45284	0	0.0637115	1	5020	tags=40%, list=16%, signal=47%
CARBOXYLIC_ACID_TRANSMEMBRANE_TRANSPORTER_ACTIVITY	CARBOXYLIC_ACID_TRANSMEMBRANE_TRANSPORTER_ACTIVITY		38	-0.478859	-1.45277	0.0266272	0.0637091	1	3312	tags=34%, list=11%, signal=38%
GSE3982_NEUTROPHIL_VS_EFF_MEMORY_CD4_TCELL_DN	GSE3982_NEUTROPHIL_VS_EFF_MEMORY_CD4_TCELL_DN		189	-0.379643	-1.45201	0	0.0640214	1	5000	tags=41%, list=16%, signal=48%
DOUGLAS_BMI1_TARGETS_UP	DOUGLAS_BMI1_TARGETS_UP		516	-0.339287	-1.45148	0	0.0642336	1	4300	tags=32%, list=14%, signal=37%
GSE10239_MEMORY_VS_KLRG1INT_EFF_CD8_TCELL_DN	GSE10239_MEMORY_VS_KLRG1INT_EFF_CD8_TCELL_DN		191	-0.377638	-1.45132	0	0.0642667	1	5581	tags=46%, list=18%, signal=55%
POLYSACCHARIDE_BINDING	POLYSACCHARIDE_BINDING		32	-0.496903	-1.45126	0.0326087	0.0642476	1	2222	tags=22%, list=7%, signal=24%
V$ALX4_01	V$ALX4_01		13	-0.629865	-1.4512	0.0707071	0.0642357	1	2073	tags=46%, list=7%, signal=49%
ORGANELLAR_SMALL_RIBOSOMAL_SUBUNIT	ORGANELLAR_SMALL_RIBOSOMAL_SUBUNIT		11	-0.647248	-1.4511	0.0530504	0.0642394	1	3353	tags=64%, list=11%, signal=71%
GSE8685_IL2_ACT_IL2_STARVED_VS_IL15_ACT_IL2_STARVED_CD4_TCELL_DN	GSE8685_IL2_ACT_IL2_STARVED_VS_IL15_ACT_IL2_STARVED_CD4_TCELL_DN		186	-0.371645	-1.45087	0	0.0643281	1	4873	tags=41%, list=15%, signal=48%
OXIDOREDUCTASE_ACTIVITY	OXIDOREDUCTASE_ACTIVITY		256	-0.362086	-1.45084	0	0.0643104	1	4368	tags=30%, list=14%, signal=34%
GSE8921_UNSTIM_0H_VS_TLR1_2_STIM_MONOCYTE_6H_UP	GSE8921_UNSTIM_0H_VS_TLR1_2_STIM_MONOCYTE_6H_UP		172	-0.380129	-1.45031	0	0.0645088	1	5368	tags=39%, list=17%, signal=47%
KRASNOSELSKAYA_ILF3_TARGETS_DN	KRASNOSELSKAYA_ILF3_TARGETS_DN		41	-0.46341	-1.44989	0.0222222	0.0646695	1	3579	tags=39%, list=11%, signal=44%
HOSHIDA_LIVER_CANCER_LATE_RECURRENCE_DN	HOSHIDA_LIVER_CANCER_LATE_RECURRENCE_DN		60	-0.440155	-1.44982	0.0337423	0.0646759	1	3884	tags=32%, list=12%, signal=36%
GSE40274_CTRL_VS_EOS_TRANSDUCED_ACTIVATED_CD4_TCELL_UP	GSE40274_CTRL_VS_EOS_TRANSDUCED_ACTIVATED_CD4_TCELL_UP		163	-0.377852	-1.44971	0.005	0.0646822	1	4293	tags=40%, list=14%, signal=47%
GSE17721_PAM3CSK4_VS_CPG_12H_BMDM_UP	GSE17721_PAM3CSK4_VS_CPG_12H_BMDM_UP		184	-0.371824	-1.4497	0	0.0646458	1	4322	tags=35%, list=14%, signal=40%
BIOCARTA_VEGF_PATHWAY	BIOCARTA_VEGF_PATHWAY		28	-0.51657	-1.44957	0.028169	0.0646733	1	3429	tags=50%, list=11%, signal=56%
GSE6269_HEALTHY_VS_STREP_PNEUMO_INF_PBMC_DN	GSE6269_HEALTHY_VS_STREP_PNEUMO_INF_PBMC_DN		159	-0.38184	-1.448	0	0.0653667	1	2825	tags=26%, list=9%, signal=28%
MORF_SART1	MORF_SART1		63	-0.437785	-1.44789	0.0168919	0.0653875	1	5395	tags=35%, list=17%, signal=42%
DORMOY_ELAVL1_TARGETS	DORMOY_ELAVL1_TARGETS		15	-0.609117	-1.44781	0.0603015	0.0653861	1	2629	tags=40%, list=8%, signal=44%
GNF2_HDAC1	GNF2_HDAC1		109	-0.408662	-1.44685	0.0135747	0.0657904	1	5015	tags=39%, list=16%, signal=46%
BIOCARTA_RB_PATHWAY	BIOCARTA_RB_PATHWAY		12	-0.630178	-1.44623	0.0808824	0.0660472	1	3331	tags=67%, list=11%, signal=75%
REACTOME_BASE_EXCISION_REPAIR	REACTOME_BASE_EXCISION_REPAIR		19	-0.56983	-1.4457	0.0645161	0.0662498	1	4140	tags=63%, list=13%, signal=73%
GSE13306_RA_VS_UNTREATED_TREG_UP	GSE13306_RA_VS_UNTREATED_TREG_UP		170	-0.378846	-1.44477	0	0.0666163	1	4054	tags=33%, list=13%, signal=38%
AIYAR_COBRA1_TARGETS_DN	AIYAR_COBRA1_TARGETS_DN		28	-0.520317	-1.44468	0.0542857	0.0666115	1	2103	tags=32%, list=7%, signal=34%
GSE40274_GATA1_VS_FOXP3_AND_GATA1_TRANSDUCED_ACTIVATED_CD4_TCELL_DN	GSE40274_GATA1_VS_FOXP3_AND_GATA1_TRANSDUCED_ACTIVATED_CD4_TCELL_DN		187	-0.373663	-1.44459	0	0.0666032	1	4041	tags=39%, list=13%, signal=44%
GSE31082_DP_VS_CD8_SP_THYMOCYTE_DN	GSE31082_DP_VS_CD8_SP_THYMOCYTE_DN		187	-0.377048	-1.44424	0	0.0667243	1	4727	tags=38%, list=15%, signal=44%
GSE12198_CTRL_VS_LOW_IL2_STIM_NK_CELL_DN	GSE12198_CTRL_VS_LOW_IL2_STIM_NK_CELL_DN		180	-0.375854	-1.44409	0.00507614	0.0667483	1	4853	tags=38%, list=15%, signal=45%
REACTOME_TELOMERE_MAINTENANCE	REACTOME_TELOMERE_MAINTENANCE		67	-0.431763	-1.44395	0.0100334	0.0667696	1	4865	tags=52%, list=15%, signal=62%
LIANG_HEMATOPOIESIS_STEM_CELL_NUMBER_LARGE_VS_TINY_UP	LIANG_HEMATOPOIESIS_STEM_CELL_NUMBER_LARGE_VS_TINY_UP		43	-0.470396	-1.44394	0.0411765	0.0667381	1	4017	tags=42%, list=13%, signal=48%
PROTEIN_COMPLEX_DISASSEMBLY	PROTEIN_COMPLEX_DISASSEMBLY		12	-0.631543	-1.44341	0.0837563	0.0669484	1	5909	tags=67%, list=19%, signal=82%
GSE3982_MAC_VS_TH2_DN	GSE3982_MAC_VS_TH2_DN		186	-0.377103	-1.4434	0	0.0669119	1	4780	tags=41%, list=15%, signal=48%
GSE16385_UNTREATED_VS_12H_ROSIGLITAZONE_TREATED_MACROPHAGE_DN	GSE16385_UNTREATED_VS_12H_ROSIGLITAZONE_TREATED_MACROPHAGE_DN		149	-0.386204	-1.4434	0	0.0668732	1	3639	tags=24%, list=12%, signal=27%
TERAMOTO_OPN_TARGETS_CLUSTER_4	TERAMOTO_OPN_TARGETS_CLUSTER_4		12	-0.623372	-1.4432	0.0869565	0.0669328	1	997	tags=25%, list=3%, signal=26%
GSE14026_TH1_VS_TH17_UP	GSE14026_TH1_VS_TH17_UP		158	-0.374411	-1.44263	0	0.0671862	1	3011	tags=25%, list=10%, signal=28%
GSE19923_WT_VS_HEB_AND_E2A_KO_DP_THYMOCYTE_UP	GSE19923_WT_VS_HEB_AND_E2A_KO_DP_THYMOCYTE_UP		189	-0.377223	-1.44249	0	0.0672191	1	3430	tags=33%, list=11%, signal=37%
REACTOME_MRNA_CAPPING	REACTOME_MRNA_CAPPING		29	-0.500986	-1.44197	0.0487805	0.0674174	1	6865	tags=55%, list=22%, signal=71%
MODULE_445	MODULE_445		14	-0.597281	-1.44162	0.0863874	0.0675199	1	6604	tags=29%, list=21%, signal=36%
NUCLEAR_SPECK	NUCLEAR_SPECK		10	-0.639296	-1.44128	0.0869565	0.0676427	1	5199	tags=70%, list=17%, signal=84%
CHEN_LUNG_CANCER_SURVIVAL	CHEN_LUNG_CANCER_SURVIVAL		21	-0.545069	-1.44114	0.0689655	0.0676697	1	4504	tags=43%, list=14%, signal=50%
GSE6259_DEC205_POS_DC_VS_CD4_TCELL_DN	GSE6259_DEC205_POS_DC_VS_CD4_TCELL_DN		175	-0.375151	-1.44098	0	0.0677028	1	4805	tags=37%, list=15%, signal=44%
PID_RANBP2_PATHWAY	PID_RANBP2_PATHWAY		11	-0.64438	-1.44089	0.0895884	0.0677148	1	4487	tags=55%, list=14%, signal=64%
SAKAI_TUMOR_INFILTRATING_MONOCYTES_DN	SAKAI_TUMOR_INFILTRATING_MONOCYTES_DN		79	-0.411423	-1.44079	0.00687285	0.0677331	1	6079	tags=49%, list=19%, signal=61%
GRAESSMANN_APOPTOSIS_BY_DOXORUBICIN_DN	GRAESSMANN_APOPTOSIS_BY_DOXORUBICIN_DN		1682	-0.320116	-1.44074	0	0.0677152	1	4760	tags=32%, list=15%, signal=36%
MODULE_227	MODULE_227		13	-0.621125	-1.44058	0.0895141	0.0677509	1	5346	tags=54%, list=17%, signal=65%
REACTOME_FORMATION_OF_ATP_BY_CHEMIOSMOTIC_COUPLING	REACTOME_FORMATION_OF_ATP_BY_CHEMIOSMOTIC_COUPLING		13	-0.616474	-1.44023	0.0835322	0.067871	1	4745	tags=54%, list=15%, signal=63%
GSE11864_UNTREATED_VS_CSF1_IFNG_IN_MAC_DN	GSE11864_UNTREATED_VS_CSF1_IFNG_IN_MAC_DN		185	-0.375201	-1.44013	0	0.0678779	1	5291	tags=42%, list=17%, signal=50%
BLALOCK_ALZHEIMERS_DISEASE_INCIPIENT_DN	BLALOCK_ALZHEIMERS_DISEASE_INCIPIENT_DN		159	-0.383886	-1.44012	0	0.067839	1	3848	tags=29%, list=12%, signal=33%
GSE3039_CD4_TCELL_VS_ALPHABETA_CD8_TCELL_DN	GSE3039_CD4_TCELL_VS_ALPHABETA_CD8_TCELL_DN		187	-0.375529	-1.43991	0	0.0679031	1	4138	tags=34%, list=13%, signal=39%
SILIGAN_TARGETS_OF_EWS_FLI1_FUSION_DN	SILIGAN_TARGETS_OF_EWS_FLI1_FUSION_DN		17	-0.575847	-1.43896	0.0759162	0.0683078	1	3889	tags=41%, list=12%, signal=47%
MITOCHONDRIAL_SMALL_RIBOSOMAL_SUBUNIT	MITOCHONDRIAL_SMALL_RIBOSOMAL_SUBUNIT		11	-0.647248	-1.43877	0.0837438	0.068364	1	3353	tags=64%, list=11%, signal=71%
CEBALLOS_TARGETS_OF_TP53_AND_MYC_UP	CEBALLOS_TARGETS_OF_TP53_AND_MYC_UP		20	-0.548364	-1.43871	0.0588235	0.0683547	1	2732	tags=40%, list=9%, signal=44%
MODULE_247	MODULE_247		31	-0.501821	-1.43836	0.0485175	0.0684784	1	472	tags=23%, list=2%, signal=23%
GSE39820_CTRL_VS_IL1B_IL6_CD4_TCELL_UP	GSE39820_CTRL_VS_IL1B_IL6_CD4_TCELL_UP		187	-0.370502	-1.43739	0.00520833	0.0689054	1	3545	tags=34%, list=11%, signal=38%
YAGI_AML_SURVIVAL	YAGI_AML_SURVIVAL		124	-0.387671	-1.43737	0.00796813	0.0688758	1	3862	tags=32%, list=12%, signal=37%
GSE23695_CD57_POS_VS_NEG_NK_CELL_UP	GSE23695_CD57_POS_VS_NEG_NK_CELL_UP		186	-0.370446	-1.43713	0.00574713	0.0689541	1	3270	tags=35%, list=10%, signal=39%
GSE5589_UNSTIM_VS_45MIN_LPS_AND_IL6_STIM_MACROPHAGE_DN	GSE5589_UNSTIM_VS_45MIN_LPS_AND_IL6_STIM_MACROPHAGE_DN		187	-0.370726	-1.43711	0	0.0689189	1	3538	tags=28%, list=11%, signal=32%
GCM_NPM1	GCM_NPM1		116	-0.383376	-1.43709	0.0131579	0.0688934	1	5340	tags=34%, list=17%, signal=40%
GSE1925_CTRL_VS_3H_IFNG_STIM_MACROPHAGE_UP	GSE1925_CTRL_VS_3H_IFNG_STIM_MACROPHAGE_UP		183	-0.37018	-1.43663	0	0.0690803	1	3560	tags=31%, list=11%, signal=35%
YAMANAKA_GLIOBLASTOMA_SURVIVAL_UP	YAMANAKA_GLIOBLASTOMA_SURVIVAL_UP		10	-0.66536	-1.43661	0.0716049	0.0690534	1	3562	tags=50%, list=11%, signal=56%
GSE17721_PAM3CSK4_VS_GADIQUIMOD_24H_BMDM_UP	GSE17721_PAM3CSK4_VS_GADIQUIMOD_24H_BMDM_UP		181	-0.371764	-1.43644	0	0.0690859	1	4163	tags=30%, list=13%, signal=34%
TOOKER_GEMCITABINE_RESISTANCE_DN	TOOKER_GEMCITABINE_RESISTANCE_DN		119	-0.394061	-1.43613	0	0.0691872	1	2978	tags=31%, list=9%, signal=34%
GSE30083_SP1_VS_SP4_THYMOCYTE_UP	GSE30083_SP1_VS_SP4_THYMOCYTE_UP		174	-0.372607	-1.43597	0.00485437	0.0692222	1	5691	tags=46%, list=18%, signal=56%
MONOCARBOXYLIC_ACID_METABOLIC_PROCESS	MONOCARBOXYLIC_ACID_METABOLIC_PROCESS		79	-0.411912	-1.43584	0.0034965	0.0692319	1	5563	tags=35%, list=18%, signal=43%
SESTO_RESPONSE_TO_UV_C7	SESTO_RESPONSE_TO_UV_C7		65	-0.432322	-1.43584	0.0318021	0.0691926	1	5118	tags=58%, list=16%, signal=70%
REACTOME_RESOLUTION_OF_AP_SITES_VIA_THE_MULTIPLE_NUCLEOTIDE_PATCH_REPLACEMENT_PATHWAY	REACTOME_RESOLUTION_OF_AP_SITES_VIA_THE_MULTIPLE_NUCLEOTIDE_PATCH_REPLACEMENT_PATHWAY		17	-0.565838	-1.4352	0.0618812	0.0694334	1	4140	tags=65%, list=13%, signal=74%
BIOSYNTHETIC_PROCESS	BIOSYNTHETIC_PROCESS		428	-0.343136	-1.43513	0	0.0694317	1	4144	tags=27%, list=13%, signal=31%
GSE5589_LPS_VS_LPS_AND_IL10_STIM_IL6_KO_MACROPHAGE_45MIN_DN	GSE5589_LPS_VS_LPS_AND_IL10_STIM_IL6_KO_MACROPHAGE_45MIN_DN		185	-0.365712	-1.43494	0.00571429	0.0694766	1	4218	tags=36%, list=13%, signal=41%
GSE17721_LPS_VS_POLYIC_6H_BMDM_UP	GSE17721_LPS_VS_POLYIC_6H_BMDM_UP		181	-0.371401	-1.43429	0	0.069762	1	4379	tags=32%, list=14%, signal=37%
GSE40666_WT_VS_STAT1_KO_CD8_TCELL_WITH_IFNA_STIM_90MIN_DN	GSE40666_WT_VS_STAT1_KO_CD8_TCELL_WITH_IFNA_STIM_90MIN_DN		185	-0.366119	-1.43403	0	0.0698433	1	3524	tags=40%, list=11%, signal=45%
MOOTHA_FFA_OXYDATION	MOOTHA_FFA_OXYDATION		21	-0.53745	-1.43347	0.064433	0.0700804	1	4460	tags=52%, list=14%, signal=61%
GSE2770_UNTREATED_VS_TGFB_AND_IL4_TREATED_ACT_CD4_TCELL_2H_UP	GSE2770_UNTREATED_VS_TGFB_AND_IL4_TREATED_ACT_CD4_TCELL_2H_UP		184	-0.369022	-1.43311	0	0.0702075	1	4258	tags=34%, list=14%, signal=39%
AZARE_NEOPLASTIC_TRANSFORMATION_BY_STAT3_DN	AZARE_NEOPLASTIC_TRANSFORMATION_BY_STAT3_DN		13	-0.624003	-1.43295	0.0666667	0.0702449	1	984	tags=15%, list=3%, signal=16%
GSE19888_CTRL_VS_T_CELL_MEMBRANES_ACT_MAST_CELL_UP	GSE19888_CTRL_VS_T_CELL_MEMBRANES_ACT_MAST_CELL_UP		191	-0.370488	-1.43219	0	0.0705495	1	4993	tags=35%, list=16%, signal=41%
BHATI_G2M_ARREST_BY_2METHOXYESTRADIOL_UP	BHATI_G2M_ARREST_BY_2METHOXYESTRADIOL_UP		107	-0.39162	-1.43217	0.0130435	0.0705131	1	4113	tags=40%, list=13%, signal=46%
REACTOME_PURINE_METABOLISM	REACTOME_PURINE_METABOLISM		32	-0.490835	-1.43192	0.0514905	0.0706001	1	3087	tags=44%, list=10%, signal=48%
GSE32255_WT_VS_JMJD2D_KNOCKDOWN_4H_LPS_STIM_DC_DN	GSE32255_WT_VS_JMJD2D_KNOCKDOWN_4H_LPS_STIM_DC_DN		140	-0.381406	-1.43171	0.004329	0.0706624	1	3229	tags=34%, list=10%, signal=37%
GNF2_DAP3	GNF2_DAP3		118	-0.392272	-1.4315	0.0158103	0.0707229	1	4982	tags=33%, list=16%, signal=39%
ICOSANOID_METABOLIC_PROCESS	ICOSANOID_METABOLIC_PROCESS		14	-0.604673	-1.43134	0.0689655	0.0707574	1	1784	tags=21%, list=6%, signal=23%
SANSOM_APC_TARGETS_UP	SANSOM_APC_TARGETS_UP		110	-0.395762	-1.4312	0.00840336	0.0707893	1	5543	tags=48%, list=18%, signal=58%
GSE1448_CTRL_VS_ANTI_VALPHA2_DP_THYMOCYTE_UP	GSE1448_CTRL_VS_ANTI_VALPHA2_DP_THYMOCYTE_UP		173	-0.372892	-1.43093	0	0.0708793	1	4564	tags=35%, list=15%, signal=41%
ACTAYRNNNCCCR_UNKNOWN	ACTAYRNNNCCCR_UNKNOWN		430	-0.33846	-1.4308	0	0.0709058	1	4502	tags=33%, list=14%, signal=37%
MORF_PPP5C	MORF_PPP5C		88	-0.410248	-1.43079	0.00353357	0.0708666	1	4140	tags=36%, list=13%, signal=42%
BAE_BRCA1_TARGETS_UP	BAE_BRCA1_TARGETS_UP		69	-0.416749	-1.43004	0.0232558	0.0712168	1	4958	tags=41%, list=16%, signal=48%
V$MAX_01	V$MAX_01		234	-0.359735	-1.42988	0	0.0712543	1	4539	tags=35%, list=14%, signal=40%
GSE1791_CTRL_VS_NEUROMEDINU_IN_T_CELL_LINE_0.8H_UP	GSE1791_CTRL_VS_NEUROMEDINU_IN_T_CELL_LINE_0.8H_UP		176	-0.371451	-1.42928	0	0.0715088	1	5133	tags=43%, list=16%, signal=51%
DARWICHE_PAPILLOMA_RISK_LOW_UP	DARWICHE_PAPILLOMA_RISK_LOW_UP		141	-0.384556	-1.42919	0.00900901	0.0715149	1	4041	tags=35%, list=13%, signal=41%
GSE3982_BASOPHIL_VS_NKCELL_DN	GSE3982_BASOPHIL_VS_NKCELL_DN		173	-0.3757	-1.42905	0	0.0715483	1	2628	tags=25%, list=8%, signal=27%
GSE5099_MONOCYTE_VS_ALTERNATIVE_M2_MACROPHAGE_UP	GSE5099_MONOCYTE_VS_ALTERNATIVE_M2_MACROPHAGE_UP		152	-0.378503	-1.42885	0	0.0716013	1	4620	tags=30%, list=15%, signal=35%
LEE_LIVER_CANCER_CIPROFIBRATE_UP	LEE_LIVER_CANCER_CIPROFIBRATE_UP		54	-0.442994	-1.42867	0.0353698	0.0716468	1	3695	tags=28%, list=12%, signal=31%
GSE557_WT_VS_CIITA_KO_DC_UP	GSE557_WT_VS_CIITA_KO_DC_UP		187	-0.368091	-1.42865	0	0.0716182	1	5195	tags=36%, list=17%, signal=43%
SHIPP_DLBCL_CURED_VS_FATAL_DN	SHIPP_DLBCL_CURED_VS_FATAL_DN		42	-0.464779	-1.42829	0.0443213	0.071771	1	5320	tags=40%, list=17%, signal=49%
GSE360_T_GONDII_VS_M_TUBERCULOSIS_MAC_UP	GSE360_T_GONDII_VS_M_TUBERCULOSIS_MAC_UP		182	-0.367349	-1.42794	0	0.0719255	1	4436	tags=38%, list=14%, signal=45%
PROTEIN_COMPLEX	PROTEIN_COMPLEX		764	-0.32973	-1.42719	0	0.0722755	1	4112	tags=28%, list=13%, signal=32%
GSE15330_HSC_VS_LYMPHOID_PRIMED_MULTIPOTENT_PROGENITOR_IKAROS_KO_UP	GSE15330_HSC_VS_LYMPHOID_PRIMED_MULTIPOTENT_PROGENITOR_IKAROS_KO_UP		178	-0.367721	-1.4269	0.00526316	0.0723698	1	4745	tags=35%, list=15%, signal=41%
DEVELOPMENT_OF_PRIMARY_SEXUAL_CHARACTERISTICS	DEVELOPMENT_OF_PRIMARY_SEXUAL_CHARACTERISTICS		21	-0.542291	-1.42673	0.0488432	0.0724114	1	5845	tags=52%, list=19%, signal=64%
GGAANCGGAANY_UNKNOWN	GGAANCGGAANY_UNKNOWN		104	-0.39491	-1.42645	0.00738007	0.072504	1	5328	tags=43%, list=17%, signal=52%
WENG_POR_TARGETS_LIVER_UP	WENG_POR_TARGETS_LIVER_UP		35	-0.491697	-1.42599	0.033419	0.0727062	1	903	tags=26%, list=3%, signal=26%
HU_ANGIOGENESIS_DN	HU_ANGIOGENESIS_DN		34	-0.484372	-1.42568	0.0340909	0.0728056	1	4372	tags=44%, list=14%, signal=51%
MCGARVEY_SILENCED_BY_METHYLATION_IN_COLON_CANCER	MCGARVEY_SILENCED_BY_METHYLATION_IN_COLON_CANCER		27	-0.51083	-1.42561	0.0681199	0.0727989	1	3595	tags=19%, list=11%, signal=21%
MODULE_56	MODULE_56		12	-0.625153	-1.42505	0.0831296	0.0730481	1	5118	tags=92%, list=16%, signal=109%
3_5_EXONUCLEASE_ACTIVITY	3_5_EXONUCLEASE_ACTIVITY		12	-0.617188	-1.42406	0.0963855	0.0735095	1	5013	tags=75%, list=16%, signal=89%
GSE17721_12H_VS_24H_LPS_BMDM_DN	GSE17721_12H_VS_24H_LPS_BMDM_DN		186	-0.368028	-1.42395	0.0103093	0.0735339	1	5113	tags=41%, list=16%, signal=49%
ZHAN_VARIABLE_EARLY_DIFFERENTIATION_GENES_DN	ZHAN_VARIABLE_EARLY_DIFFERENTIATION_GENES_DN		30	-0.503759	-1.42374	0.0369393	0.0735969	1	4368	tags=53%, list=14%, signal=62%
ORGANIC_ACID_TRANSMEMBRANE_TRANSPORTER_ACTIVITY	ORGANIC_ACID_TRANSMEMBRANE_TRANSPORTER_ACTIVITY		38	-0.478859	-1.42373	0.0451389	0.0735587	1	3312	tags=34%, list=11%, signal=38%
GSE17721_POLYIC_VS_CPG_8H_BMDM_DN	GSE17721_POLYIC_VS_CPG_8H_BMDM_DN		184	-0.368816	-1.4237	0.0121212	0.0735321	1	4181	tags=34%, list=13%, signal=39%
PELLICCIOTTA_HDAC_IN_ANTIGEN_PRESENTATION_UP	PELLICCIOTTA_HDAC_IN_ANTIGEN_PRESENTATION_UP		59	-0.436669	-1.42368	0.0196721	0.0734987	1	5174	tags=41%, list=16%, signal=49%
GSE17721_POLYIC_VS_PAM3CSK4_16H_BMDM_DN	GSE17721_POLYIC_VS_PAM3CSK4_16H_BMDM_DN		186	-0.367371	-1.42352	0.00581395	0.0735445	1	4415	tags=34%, list=14%, signal=40%
MODULE_519	MODULE_519		15	-0.579919	-1.42337	0.0609137	0.0735763	1	5604	tags=47%, list=18%, signal=57%
GSE37301_COMMON_LYMPHOID_PROGENITOR_VS_CD4_TCELL_UP	GSE37301_COMMON_LYMPHOID_PROGENITOR_VS_CD4_TCELL_UP		176	-0.368185	-1.42327	0	0.0735867	1	4304	tags=40%, list=14%, signal=46%
REACTOME_TRANSCRIPTION	REACTOME_TRANSCRIPTION		188	-0.364005	-1.42235	0	0.074022	1	5000	tags=40%, list=16%, signal=47%
LOPEZ_MBD_TARGETS	LOPEZ_MBD_TARGETS		868	-0.321015	-1.42154	0	0.0743857	1	5000	tags=33%, list=16%, signal=38%
GSE21774_CD62L_POS_CD56_DIM_VS_CD62L_NEG_CD56_DIM_NK_CELL_DN	GSE21774_CD62L_POS_CD56_DIM_VS_CD62L_NEG_CD56_DIM_NK_CELL_DN		172	-0.373781	-1.42123	0.0116279	0.0745135	1	2487	tags=22%, list=8%, signal=24%
GSE1791_CTRL_VS_NEUROMEDINU_IN_T_CELL_LINE_3H_DN	GSE1791_CTRL_VS_NEUROMEDINU_IN_T_CELL_LINE_3H_DN		171	-0.368949	-1.42112	0	0.074534	1	4019	tags=36%, list=13%, signal=41%
NUCLEOBASENUCLEOSIDENUCLEOTIDE_AND_NUCLEIC_ACID_METABOLIC_PROCESS	NUCLEOBASENUCLEOSIDENUCLEOTIDE_AND_NUCLEIC_ACID_METABOLIC_PROCESS		1178	-0.319723	-1.421	0	0.0745518	1	4710	tags=32%, list=15%, signal=36%
MCBRYAN_PUBERTAL_BREAST_6_7WK_DN	MCBRYAN_PUBERTAL_BREAST_6_7WK_DN		70	-0.423636	-1.42021	0.0189873	0.0749121	1	3112	tags=29%, list=10%, signal=32%
RCGCANGCGY_V$NRF1_Q6	RCGCANGCGY_V$NRF1_Q6		860	-0.330161	-1.42012	0	0.0749143	1	4311	tags=29%, list=14%, signal=33%
V$PPARG_01	V$PPARG_01		41	-0.456884	-1.41913	0.0542857	0.0753623	1	5000	tags=49%, list=16%, signal=58%
BREDEMEYER_RAG_SIGNALING_NOT_VIA_ATM_UP	BREDEMEYER_RAG_SIGNALING_NOT_VIA_ATM_UP		56	-0.429015	-1.41898	0.0369231	0.075392	1	5705	tags=43%, list=18%, signal=52%
XU_CREBBP_TARGETS_UP	XU_CREBBP_TARGETS_UP		24	-0.534888	-1.41871	0.0763359	0.0754747	1	2193	tags=38%, list=7%, signal=40%
GCM_AIP	GCM_AIP		35	-0.481076	-1.41868	0.0412979	0.0754471	1	5298	tags=43%, list=17%, signal=51%
MAYBURD_RESPONSE_TO_L663536_DN	MAYBURD_RESPONSE_TO_L663536_DN		51	-0.44634	-1.41862	0.0246914	0.0754356	1	4254	tags=35%, list=14%, signal=41%
REACTOME_ACETYLCHOLINE_BINDING_AND_DOWNSTREAM_EVENTS	REACTOME_ACETYLCHOLINE_BINDING_AND_DOWNSTREAM_EVENTS		15	-0.58095	-1.41848	0.0883055	0.0754555	1	5920	tags=33%, list=19%, signal=41%
BLALOCK_ALZHEIMERS_DISEASE_DN	BLALOCK_ALZHEIMERS_DISEASE_DN		1159	-0.321946	-1.41827	0	0.075508	1	4479	tags=30%, list=14%, signal=34%
WIKMAN_ASBESTOS_LUNG_CANCER_DN	WIKMAN_ASBESTOS_LUNG_CANCER_DN		26	-0.508308	-1.41823	0.0612813	0.0754884	1	4347	tags=38%, list=14%, signal=45%
N_METHYLTRANSFERASE_ACTIVITY	N_METHYLTRANSFERASE_ACTIVITY		11	-0.632476	-1.41813	0.0902778	0.0754936	1	885	tags=27%, list=3%, signal=28%
GSE7509_UNSTIM_VS_FCGRIIB_STIM_MONOCYTE_UP	GSE7509_UNSTIM_VS_FCGRIIB_STIM_MONOCYTE_UP		160	-0.376127	-1.41807	0	0.0754788	1	4690	tags=38%, list=15%, signal=45%
GSE37533_PPARG2_FOXP3_VS_FOXP3_TRANSDUCED_CD4_TCELL_UP	GSE37533_PPARG2_FOXP3_VS_FOXP3_TRANSDUCED_CD4_TCELL_UP		183	-0.368621	-1.41784	0	0.0755612	1	3870	tags=34%, list=12%, signal=39%
GSE4984_UNTREATED_VS_VEHICLE_CTRL_TREATED_DC_DN	GSE4984_UNTREATED_VS_VEHICLE_CTRL_TREATED_DC_DN		156	-0.369933	-1.41778	0.00520833	0.075553	1	4278	tags=40%, list=14%, signal=46%
GSE17721_LPS_VS_POLYIC_8H_BMDM_UP	GSE17721_LPS_VS_POLYIC_8H_BMDM_UP		180	-0.360336	-1.41713	0	0.0758374	1	4940	tags=38%, list=16%, signal=45%
LEI_MYB_TARGETS	LEI_MYB_TARGETS		289	-0.350846	-1.41682	0	0.0759626	1	3077	tags=29%, list=10%, signal=32%
BRUINS_UVC_RESPONSE_LATE	BRUINS_UVC_RESPONSE_LATE		1025	-0.323189	-1.41606	0	0.0762843	1	4913	tags=33%, list=16%, signal=38%
MACLACHLAN_BRCA1_TARGETS_UP	MACLACHLAN_BRCA1_TARGETS_UP		20	-0.557563	-1.41601	0.0764873	0.0762631	1	3786	tags=35%, list=12%, signal=40%
LIANG_HEMATOPOIESIS_STEM_CELL_NUMBER_QTL	LIANG_HEMATOPOIESIS_STEM_CELL_NUMBER_QTL		16	-0.570277	-1.41561	0.0631313	0.0764194	1	3862	tags=44%, list=12%, signal=50%
GSE360_L_DONOVANI_VS_T_GONDII_MAC_DN	GSE360_L_DONOVANI_VS_T_GONDII_MAC_DN		190	-0.364896	-1.41559	0	0.0763828	1	4693	tags=39%, list=15%, signal=46%
GSE3982_NEUTROPHIL_VS_BCELL_DN	GSE3982_NEUTROPHIL_VS_BCELL_DN		187	-0.366894	-1.41527	0	0.0764973	1	4311	tags=34%, list=14%, signal=39%
MORF_CDC10	MORF_CDC10		142	-0.381698	-1.41458	0.00947867	0.0767942	1	5505	tags=42%, list=18%, signal=50%
MEIOTIC_CELL_CYCLE	MEIOTIC_CELL_CYCLE		33	-0.481032	-1.41451	0.0484848	0.0767901	1	2598	tags=39%, list=8%, signal=43%
MORF_PSMC2	MORF_PSMC2		114	-0.39482	-1.41411	0.004	0.0769563	1	6532	tags=46%, list=21%, signal=57%
GSE1460_NAIVE_CD4_TCELL_ADULT_BLOOD_VS_THYMIC_STROMAL_CELL_DN	GSE1460_NAIVE_CD4_TCELL_ADULT_BLOOD_VS_THYMIC_STROMAL_CELL_DN		185	-0.359677	-1.4137	0	0.0771398	1	3565	tags=30%, list=11%, signal=33%
GSE1791_CTRL_VS_NEUROMEDINU_IN_T_CELL_LINE_12H_UP	GSE1791_CTRL_VS_NEUROMEDINU_IN_T_CELL_LINE_12H_UP		177	-0.367763	-1.41367	0.00531915	0.0771136	1	4049	tags=33%, list=13%, signal=37%
PILON_KLF1_TARGETS_DN	PILON_KLF1_TARGETS_DN		1905	-0.312621	-1.4133	0	0.077272	1	4508	tags=32%, list=14%, signal=35%
GSE19825_NAIVE_VS_IL2RAHIGH_DAY3_EFF_CD8_TCELL_DN	GSE19825_NAIVE_VS_IL2RAHIGH_DAY3_EFF_CD8_TCELL_DN		189	-0.368312	-1.41322	0	0.0772689	1	4448	tags=39%, list=14%, signal=45%
GSE22313_HEALTHY_VS_SLE_MOUSE_CD4_TCELL_DN	GSE22313_HEALTHY_VS_SLE_MOUSE_CD4_TCELL_DN		191	-0.366794	-1.41322	0.00549451	0.0772283	1	3691	tags=39%, list=12%, signal=44%
MAINA_VHL_TARGETS_DN	MAINA_VHL_TARGETS_DN		16	-0.590812	-1.41317	0.0796915	0.0772173	1	2655	tags=38%, list=8%, signal=41%
GSE1925_3H_VS_24H_IFNG_STIM_MACROPHAGE_UP	GSE1925_3H_VS_24H_IFNG_STIM_MACROPHAGE_UP		161	-0.368802	-1.41293	0	0.0773127	1	4917	tags=32%, list=16%, signal=38%
BENPORATH_MYC_TARGETS_WITH_EBOX	BENPORATH_MYC_TARGETS_WITH_EBOX		212	-0.359322	-1.4129	0	0.0772879	1	3424	tags=33%, list=11%, signal=37%
LEE_LIVER_CANCER_MYC_TGFA_DN	LEE_LIVER_CANCER_MYC_TGFA_DN		53	-0.438851	-1.41286	0.0501567	0.0772663	1	3372	tags=28%, list=11%, signal=32%
GSE16385_MONOCYTE_VS_12H_ROSIGLITAZONE_IL4_TREATED_MACROPHAGE_UP	GSE16385_MONOCYTE_VS_12H_ROSIGLITAZONE_IL4_TREATED_MACROPHAGE_UP		179	-0.368999	-1.41281	0	0.0772468	1	4982	tags=35%, list=16%, signal=42%
GSE16266_CTRL_VS_HEATSHOCK_AND_LPS_STIM_MEF_DN	GSE16266_CTRL_VS_HEATSHOCK_AND_LPS_STIM_MEF_DN		192	-0.363859	-1.41261	0.0154639	0.0772942	1	4260	tags=33%, list=14%, signal=38%
GSE17721_POLYIC_VS_CPG_24H_BMDM_DN	GSE17721_POLYIC_VS_CPG_24H_BMDM_DN		185	-0.366165	-1.41169	0.00588235	0.0777204	1	3194	tags=30%, list=10%, signal=33%
KANNAN_TP53_TARGETS_DN	KANNAN_TP53_TARGETS_DN		20	-0.550744	-1.41131	0.0748663	0.0778885	1	1871	tags=50%, list=6%, signal=53%
NUCLEOTIDE_METABOLIC_PROCESS	NUCLEOTIDE_METABOLIC_PROCESS		39	-0.473639	-1.41088	0.0290698	0.078091	1	5118	tags=41%, list=16%, signal=49%
GSE3920_UNTREATED_VS_IFNG_TREATED_ENDOTHELIAL_CELL_DN	GSE3920_UNTREATED_VS_IFNG_TREATED_ENDOTHELIAL_CELL_DN		173	-0.364505	-1.4101	0.0105263	0.0784366	1	4741	tags=32%, list=15%, signal=37%
REACTOME_PRESYNAPTIC_NICOTINIC_ACETYLCHOLINE_RECEPTORS	REACTOME_PRESYNAPTIC_NICOTINIC_ACETYLCHOLINE_RECEPTORS		12	-0.606096	-1.41006	0.0839329	0.0784133	1	5920	tags=33%, list=19%, signal=41%
STARK_HYPPOCAMPUS_22Q11_DELETION_DN	STARK_HYPPOCAMPUS_22Q11_DELETION_DN		17	-0.559928	-1.40993	0.0927318	0.0784339	1	3731	tags=47%, list=12%, signal=53%
RESPONSE_TO_BACTERIUM	RESPONSE_TO_BACTERIUM		22	-0.521213	-1.40982	0.0844327	0.0784458	1	1102	tags=18%, list=4%, signal=19%
GSE3982_DC_VS_BASOPHIL_UP	GSE3982_DC_VS_BASOPHIL_UP		181	-0.363488	-1.40977	0.00531915	0.0784355	1	2687	tags=27%, list=9%, signal=29%
REACTOME_GLUCOSE_METABOLISM	REACTOME_GLUCOSE_METABOLISM		60	-0.423776	-1.40942	0.0177936	0.0785707	1	3266	tags=37%, list=10%, signal=41%
KORKOLA_EMBRYONAL_CARCINOMA_UP	KORKOLA_EMBRYONAL_CARCINOMA_UP		38	-0.463564	-1.40941	0.045584	0.078535	1	3937	tags=45%, list=13%, signal=51%
GSE22443_NAIVE_VS_ACT_AND_IL12_TREATED_CD8_TCELL_DN	GSE22443_NAIVE_VS_ACT_AND_IL12_TREATED_CD8_TCELL_DN		173	-0.365802	-1.40938	0.00502513	0.078505	1	4686	tags=32%, list=15%, signal=38%
GSE17721_CTRL_VS_LPS_8H_BMDM_UP	GSE17721_CTRL_VS_LPS_8H_BMDM_UP		183	-0.360334	-1.40915	0	0.0785762	1	5022	tags=37%, list=16%, signal=43%
GSE3039_ALPHABETA_CD8_TCELL_VS_B2_BCELL_DN	GSE3039_ALPHABETA_CD8_TCELL_VS_B2_BCELL_DN		183	-0.362136	-1.4087	0.00480769	0.0787673	1	3404	tags=32%, list=11%, signal=36%
ZHAN_MULTIPLE_MYELOMA_CD1_VS_CD2_UP	ZHAN_MULTIPLE_MYELOMA_CD1_VS_CD2_UP		59	-0.428927	-1.4084	0.0257235	0.0788697	1	3753	tags=39%, list=12%, signal=44%
GSE42088_UNINF_VS_LEISHMANIA_INF_DC_2H_UP	GSE42088_UNINF_VS_LEISHMANIA_INF_DC_2H_UP		183	-0.361909	-1.40804	0	0.0790229	1	3166	tags=32%, list=10%, signal=36%
GSE2706_LPS_VS_R848_AND_LPS_2H_STIM_DC_UP	GSE2706_LPS_VS_R848_AND_LPS_2H_STIM_DC_UP		131	-0.378805	-1.40769	0.00934579	0.0791642	1	4238	tags=31%, list=13%, signal=36%
GSE3982_NEUTROPHIL_VS_BASOPHIL_DN	GSE3982_NEUTROPHIL_VS_BASOPHIL_DN		193	-0.360687	-1.40723	0	0.0793684	1	5688	tags=44%, list=18%, signal=53%
GSE12845_IGD_NEG_BLOOD_VS_DARKZONE_GC_TONSIL_BCELL_DN	GSE12845_IGD_NEG_BLOOD_VS_DARKZONE_GC_TONSIL_BCELL_DN		190	-0.363615	-1.40722	0	0.0793278	1	3256	tags=34%, list=10%, signal=37%
KEGG_AMINO_SUGAR_AND_NUCLEOTIDE_SUGAR_METABOLISM	KEGG_AMINO_SUGAR_AND_NUCLEOTIDE_SUGAR_METABOLISM		43	-0.454642	-1.40653	0.0511182	0.0796302	1	5392	tags=49%, list=17%, signal=59%
HERNANDEZ_MITOTIC_ARREST_BY_DOCETAXEL_2_DN	HERNANDEZ_MITOTIC_ARREST_BY_DOCETAXEL_2_DN		14	-0.5821	-1.40615	0.0929648	0.0797807	1	2750	tags=43%, list=9%, signal=47%
GSE14308_TH17_VS_NAIVE_CD4_TCELL_UP	GSE14308_TH17_VS_NAIVE_CD4_TCELL_UP		188	-0.35996	-1.40599	0.0046083	0.0798259	1	3887	tags=31%, list=12%, signal=35%
REACTOME_METABOLISM_OF_CARBOHYDRATES	REACTOME_METABOLISM_OF_CARBOHYDRATES		213	-0.357743	-1.40587	0	0.0798416	1	5286	tags=40%, list=17%, signal=48%
GSE39152_BRAIN_VS_SPLEEN_CD103_NEG_MEMORY_CD8_TCELL_DN	GSE39152_BRAIN_VS_SPLEEN_CD103_NEG_MEMORY_CD8_TCELL_DN		195	-0.366186	-1.40552	0.0114943	0.0799791	1	4310	tags=36%, list=14%, signal=42%
DRUG_BINDING	DRUG_BINDING		15	-0.56734	-1.40479	0.0902062	0.080317	1	4347	tags=60%, list=14%, signal=70%
WEST_ADRENOCORTICAL_CARCINOMA_VS_ADENOMA_UP	WEST_ADRENOCORTICAL_CARCINOMA_VS_ADENOMA_UP		17	-0.551807	-1.40382	0.0761155	0.0807945	1	3786	tags=47%, list=12%, signal=53%
GSE25085_FETAL_LIVER_VS_FETAL_BM_SP4_THYMIC_IMPLANT_UP	GSE25085_FETAL_LIVER_VS_FETAL_BM_SP4_THYMIC_IMPLANT_UP		180	-0.364685	-1.40347	0	0.0809455	1	3773	tags=32%, list=12%, signal=36%
MYLLYKANGAS_AMPLIFICATION_HOT_SPOT_15	MYLLYKANGAS_AMPLIFICATION_HOT_SPOT_15		10	-0.661027	-1.40322	0.0851582	0.0810337	1	2009	tags=50%, list=6%, signal=53%
KEGG_NON_HOMOLOGOUS_END_JOINING	KEGG_NON_HOMOLOGOUS_END_JOINING		12	-0.625311	-1.40311	0.106173	0.0810641	1	5257	tags=58%, list=17%, signal=70%
GSE17721_12H_VS_24H_GARDIQUIMOD_BMDM_DN	GSE17721_12H_VS_24H_GARDIQUIMOD_BMDM_DN		186	-0.358561	-1.40307	0	0.0810396	1	4114	tags=37%, list=13%, signal=42%
GSE10240_IL22_VS_IL17_STIM_PRIMARY_BRONCHIAL_EPITHELIAL_CELLS_DN	GSE10240_IL22_VS_IL17_STIM_PRIMARY_BRONCHIAL_EPITHELIAL_CELLS_DN		189	-0.359606	-1.40288	0	0.0810974	1	4622	tags=32%, list=15%, signal=37%
GSE14350_TREG_VS_TEFF_DN	GSE14350_TREG_VS_TEFF_DN		170	-0.365278	-1.40277	0.00930233	0.0811065	1	4723	tags=32%, list=15%, signal=38%
GSE14000_TRANSLATED_RNA_VS_MRNA_4H_LPS_DC_UP	GSE14000_TRANSLATED_RNA_VS_MRNA_4H_LPS_DC_UP		185	-0.362205	-1.4017	0	0.0816573	1	4704	tags=35%, list=15%, signal=41%
GSE17721_LPS_VS_POLYIC_0.5H_BMDM_DN	GSE17721_LPS_VS_POLYIC_0.5H_BMDM_DN		174	-0.360598	-1.40166	0.0097561	0.0816344	1	4187	tags=29%, list=13%, signal=33%
MODULE_218	MODULE_218		16	-0.58039	-1.40147	0.0808625	0.0816857	1	1991	tags=25%, list=6%, signal=27%
ACTIN_FILAMENT_BINDING	ACTIN_FILAMENT_BINDING		24	-0.51518	-1.40086	0.0570652	0.0819819	1	2327	tags=21%, list=7%, signal=22%
MODULE_373	MODULE_373		17	-0.548255	-1.40072	0.0595533	0.0820195	1	5073	tags=41%, list=16%, signal=49%
GSE20152_SPHK1_KO_VS_WT_HTNFA_OVERXPRESS_ANKLE_DN	GSE20152_SPHK1_KO_VS_WT_HTNFA_OVERXPRESS_ANKLE_DN		187	-0.362669	-1.40049	0.00558659	0.0821009	1	3855	tags=33%, list=12%, signal=38%
GSE27786_NKCELL_VS_NKTCELL_DN	GSE27786_NKCELL_VS_NKTCELL_DN		179	-0.364445	-1.40039	0.00540541	0.0821158	1	3894	tags=27%, list=12%, signal=31%
CELLULAR_PROTEIN_COMPLEX_DISASSEMBLY	CELLULAR_PROTEIN_COMPLEX_DISASSEMBLY		11	-0.628365	-1.4002	0.0987654	0.0821867	1	4285	tags=55%, list=14%, signal=63%
GSE22025_UNTREATED_VS_PROGESTERONE_TREATED_CD4_TCELL_DN	GSE22025_UNTREATED_VS_PROGESTERONE_TREATED_CD4_TCELL_DN		180	-0.360161	-1.4	0	0.0822496	1	3902	tags=29%, list=12%, signal=33%
MORF_BMI1	MORF_BMI1		78	-0.399726	-1.3996	0.0143369	0.0824416	1	5745	tags=44%, list=18%, signal=53%
GSE3982_BASOPHIL_VS_CENT_MEMORY_CD4_TCELL_DN	GSE3982_BASOPHIL_VS_CENT_MEMORY_CD4_TCELL_DN		181	-0.362571	-1.39818	0	0.083221	1	3421	tags=30%, list=11%, signal=34%
GSE19772_CTRL_VS_HCMV_INF_MONOCYTES_AND_PI3K_INHIBITION_UP	GSE19772_CTRL_VS_HCMV_INF_MONOCYTES_AND_PI3K_INHIBITION_UP		166	-0.364986	-1.39719	0.0052356	0.0836863	1	4799	tags=34%, list=15%, signal=40%
GSE15930_STIM_VS_STIM_AND_TRICHOSTATINA_72H_CD8_T_CELL_DN	GSE15930_STIM_VS_STIM_AND_TRICHOSTATINA_72H_CD8_T_CELL_DN		166	-0.366645	-1.39691	0.00505051	0.083794	1	3959	tags=33%, list=13%, signal=37%
GSE2585_CD80_HIGH_VS_LOW_AIRE_KO_MTEC_DN	GSE2585_CD80_HIGH_VS_LOW_AIRE_KO_MTEC_DN		166	-0.360001	-1.39629	0.00574713	0.0841011	1	5193	tags=33%, list=17%, signal=39%
PHOSPHATASE_INHIBITOR_ACTIVITY	PHOSPHATASE_INHIBITOR_ACTIVITY		11	-0.614834	-1.39627	0.106481	0.0840687	1	2904	tags=45%, list=9%, signal=50%
COLLIS_PRKDC_SUBSTRATES	COLLIS_PRKDC_SUBSTRATES		19	-0.539659	-1.39626	0.0767123	0.0840338	1	4390	tags=37%, list=14%, signal=43%
BILANGES_RAPAMYCIN_SENSITIVE_VIA_TSC1_AND_TSC2	BILANGES_RAPAMYCIN_SENSITIVE_VIA_TSC1_AND_TSC2		68	-0.416686	-1.39598	0.029304	0.0841359	1	5882	tags=47%, list=19%, signal=58%
DNA_CATABOLIC_PROCESS	DNA_CATABOLIC_PROCESS		23	-0.523246	-1.39569	0.0577889	0.0842482	1	3807	tags=48%, list=12%, signal=54%
LIAO_HAVE_SOX4_BINDING_SITES	LIAO_HAVE_SOX4_BINDING_SITES		39	-0.456295	-1.39548	0.0490798	0.0843362	1	3826	tags=33%, list=12%, signal=38%
GSE44649_NAIVE_VS_ACTIVATED_CD8_TCELL_DN	GSE44649_NAIVE_VS_ACTIVATED_CD8_TCELL_DN		188	-0.363917	-1.39542	0	0.0843262	1	4501	tags=35%, list=14%, signal=41%
PURINE_NUCLEOTIDE_METABOLIC_PROCESS	PURINE_NUCLEOTIDE_METABOLIC_PROCESS		11	-0.628657	-1.39535	0.0918114	0.0843174	1	4504	tags=73%, list=14%, signal=85%
MODULE_159	MODULE_159		78	-0.411256	-1.39497	0.0412371	0.0844849	1	4701	tags=41%, list=15%, signal=48%
LEE_LIVER_CANCER_E2F1_DN	LEE_LIVER_CANCER_E2F1_DN		56	-0.427771	-1.39483	0.0380623	0.0845141	1	3438	tags=29%, list=11%, signal=32%
GSE3982_CTRL_VS_IGE_STIM_MAST_CELL_DN	GSE3982_CTRL_VS_IGE_STIM_MAST_CELL_DN		175	-0.361467	-1.39476	0.00492611	0.0845014	1	3999	tags=34%, list=13%, signal=39%
GSE17721_PAM3CSK4_VS_CPG_1H_BMDM_UP	GSE17721_PAM3CSK4_VS_CPG_1H_BMDM_UP		177	-0.366988	-1.39473	0	0.084471	1	4567	tags=33%, list=15%, signal=39%
KUROKAWA_LIVER_CANCER_CHEMOTHERAPY_DN	KUROKAWA_LIVER_CANCER_CHEMOTHERAPY_DN		38	-0.450399	-1.39468	0.0324484	0.0844559	1	5032	tags=42%, list=16%, signal=50%
GEORGES_TARGETS_OF_MIR192_AND_MIR215	GEORGES_TARGETS_OF_MIR192_AND_MIR215		827	-0.322379	-1.39434	0	0.0846145	1	4503	tags=32%, list=14%, signal=37%
GSE41867_DAY15_EFFECTOR_VS_DAY30_EXHAUSTED_CD8_TCELL_LCMV_CLONE13_DN	GSE41867_DAY15_EFFECTOR_VS_DAY30_EXHAUSTED_CD8_TCELL_LCMV_CLONE13_DN		190	-0.360647	-1.39396	0.0144928	0.084782	1	4413	tags=39%, list=14%, signal=46%
REACTOME_UNFOLDED_PROTEIN_RESPONSE	REACTOME_UNFOLDED_PROTEIN_RESPONSE		76	-0.40615	-1.39345	0.010274	0.0850395	1	3798	tags=34%, list=12%, signal=39%
MODULE_40	MODULE_40		74	-0.405824	-1.39272	0.0213523	0.0854027	1	4962	tags=36%, list=16%, signal=43%
KEGG_LYSINE_DEGRADATION	KEGG_LYSINE_DEGRADATION		41	-0.452927	-1.39246	0.0652819	0.0855192	1	4839	tags=46%, list=15%, signal=55%
KAECH_DAY8_EFF_VS_MEMORY_CD8_TCELL_UP	KAECH_DAY8_EFF_VS_MEMORY_CD8_TCELL_UP		186	-0.3642	-1.39235	0.00581395	0.0855429	1	4040	tags=37%, list=13%, signal=42%
GSE13411_NAIVE_VS_IGM_MEMORY_BCELL_DN	GSE13411_NAIVE_VS_IGM_MEMORY_BCELL_DN		183	-0.360776	-1.39234	0.0111732	0.0855057	1	3737	tags=32%, list=12%, signal=36%
LIAO_METASTASIS	LIAO_METASTASIS		497	-0.331633	-1.39219	0	0.0855445	1	4956	tags=33%, list=16%, signal=39%
SESTO_RESPONSE_TO_UV_C8	SESTO_RESPONSE_TO_UV_C8		71	-0.409113	-1.39106	0.0227273	0.0861651	1	5745	tags=41%, list=18%, signal=50%
GOLDRATH_NAIVE_VS_EFF_CD8_TCELL_DN	GOLDRATH_NAIVE_VS_EFF_CD8_TCELL_DN		188	-0.359477	-1.39076	0.00568182	0.0862949	1	3428	tags=36%, list=11%, signal=40%
BACOLOD_RESISTANCE_TO_ALKYLATING_AGENTS_DN	BACOLOD_RESISTANCE_TO_ALKYLATING_AGENTS_DN		55	-0.433687	-1.39039	0.0318471	0.0864625	1	2582	tags=33%, list=8%, signal=36%
GSE13522_CTRL_VS_T_CRUZI_Y_STRAIN_INF_SKIN_BALBC_MOUSE_UP	GSE13522_CTRL_VS_T_CRUZI_Y_STRAIN_INF_SKIN_BALBC_MOUSE_UP		124	-0.379882	-1.39039	0.00429185	0.0864185	1	5055	tags=37%, list=16%, signal=44%
GSE17721_LPS_VS_PAM3CSK4_4H_BMDM_DN	GSE17721_LPS_VS_PAM3CSK4_4H_BMDM_DN		189	-0.358784	-1.3891	0	0.0870995	1	3678	tags=29%, list=12%, signal=33%
GSE21927_UNTREATED_VS_GMCSF_GCSF_TREATED_BONE_MARROW_UP	GSE21927_UNTREATED_VS_GMCSF_GCSF_TREATED_BONE_MARROW_UP		162	-0.369819	-1.38893	0.00512821	0.0871425	1	4361	tags=33%, list=14%, signal=38%
GSE18281_MEDULLARY_THYMOCYTE_VS_WHOLE_MEDULLA_THYMUS_DN	GSE18281_MEDULLARY_THYMOCYTE_VS_WHOLE_MEDULLA_THYMUS_DN		172	-0.362689	-1.38886	0	0.0871317	1	4895	tags=36%, list=16%, signal=42%
DEN_INTERACT_WITH_LCA5	DEN_INTERACT_WITH_LCA5		26	-0.507456	-1.38858	0.0759494	0.0872398	1	3466	tags=46%, list=11%, signal=52%
GSE41867_NAIVE_VS_DAY30_LCMV_ARMSTRONG_MEMORY_CD8_TCELL_UP	GSE41867_NAIVE_VS_DAY30_LCMV_ARMSTRONG_MEMORY_CD8_TCELL_UP		190	-0.354909	-1.38823	0	0.0873887	1	5286	tags=39%, list=17%, signal=47%
LEE_AGING_NEOCORTEX_DN	LEE_AGING_NEOCORTEX_DN		70	-0.404802	-1.38806	0.0254777	0.0874356	1	2813	tags=21%, list=9%, signal=23%
GSE27786_CD4_TCELL_VS_NKTCELL_DN	GSE27786_CD4_TCELL_VS_NKTCELL_DN		179	-0.355011	-1.38725	0.00518135	0.0878552	1	4000	tags=30%, list=13%, signal=34%
BROWNE_HCMV_INFECTION_8HR_DN	BROWNE_HCMV_INFECTION_8HR_DN		45	-0.44328	-1.38695	0.0501567	0.0879571	1	2787	tags=31%, list=9%, signal=34%
RNA_BINDING	RNA_BINDING		249	-0.348771	-1.38676	0	0.0880118	1	6150	tags=39%, list=20%, signal=49%
INTERPHASE_OF_MITOTIC_CELL_CYCLE	INTERPHASE_OF_MITOTIC_CELL_CYCLE		60	-0.418245	-1.38674	0.0380623	0.0879754	1	2902	tags=32%, list=9%, signal=35%
DOANE_BREAST_CANCER_CLASSES_DN	DOANE_BREAST_CANCER_CLASSES_DN		30	-0.478732	-1.38664	0.0564972	0.0879969	1	5628	tags=47%, list=18%, signal=57%
GSE15330_WT_VS_IKAROS_KO_LYMPHOID_MULTIPOTENT_PROGENITOR_DN	GSE15330_WT_VS_IKAROS_KO_LYMPHOID_MULTIPOTENT_PROGENITOR_DN		175	-0.362319	-1.38663	0	0.0879575	1	4088	tags=34%, list=13%, signal=39%
MODULE_204	MODULE_204		75	-0.403595	-1.38646	0.0260586	0.0880192	1	4947	tags=40%, list=16%, signal=47%
GSE3982_MAC_VS_NEUTROPHIL_UP	GSE3982_MAC_VS_NEUTROPHIL_UP		186	-0.360388	-1.3863	0	0.0880627	1	4566	tags=33%, list=15%, signal=39%
MAINTENANCE_OF_CELLULAR_LOCALIZATION	MAINTENANCE_OF_CELLULAR_LOCALIZATION		11	-0.62628	-1.38621	0.08	0.0880741	1	5199	tags=55%, list=17%, signal=65%
MODULE_528	MODULE_528		11	-0.628466	-1.38621	0.0868486	0.0880291	1	2857	tags=55%, list=9%, signal=60%
GSE8685_IL2_STARVED_VS_IL21_ACT_IL2_STARVED_CD4_TCELL_UP	GSE8685_IL2_STARVED_VS_IL21_ACT_IL2_STARVED_CD4_TCELL_UP		189	-0.354462	-1.38581	0.00507614	0.0882073	1	4173	tags=33%, list=13%, signal=38%
SARTIPY_NORMAL_AT_INSULIN_RESISTANCE_UP	SARTIPY_NORMAL_AT_INSULIN_RESISTANCE_UP		31	-0.480601	-1.38565	0.0544959	0.0882419	1	3562	tags=48%, list=11%, signal=55%
GSE39820_TGFBETA1_IL6_VS_TGFBETA1_IL6_IL23A_TREATED_CD4_TCELL_DN	GSE39820_TGFBETA1_IL6_VS_TGFBETA1_IL6_IL23A_TREATED_CD4_TCELL_DN		179	-0.361017	-1.38542	0.00555556	0.088334	1	4487	tags=40%, list=14%, signal=46%
GSE33425_CD8_ALPHAALPHA_VS_ALPHABETA_CD161_HIGH_TCELL_DN	GSE33425_CD8_ALPHAALPHA_VS_ALPHABETA_CD161_HIGH_TCELL_DN		187	-0.35682	-1.38535	0.011236	0.0883272	1	3538	tags=32%, list=11%, signal=35%
GSE17721_LPS_VS_PAM3CSK4_8H_BMDM_DN	GSE17721_LPS_VS_PAM3CSK4_8H_BMDM_DN		189	-0.355687	-1.38513	0.0110497	0.088406	1	3049	tags=30%, list=10%, signal=33%
REACTOME_DESTABILIZATION_OF_MRNA_BY_KSRP	REACTOME_DESTABILIZATION_OF_MRNA_BY_KSRP		17	-0.56133	-1.38488	0.0920716	0.088506	1	3704	tags=53%, list=12%, signal=60%
REACTOME_ASSOCIATION_OF_TRIC_CCT_WITH_TARGET_PROTEINS_DURING_BIOSYNTHESIS	REACTOME_ASSOCIATION_OF_TRIC_CCT_WITH_TARGET_PROTEINS_DURING_BIOSYNTHESIS		26	-0.502214	-1.38488	0.077135	0.0884633	1	5470	tags=54%, list=17%, signal=65%
REACTOME_VIRAL_MESSENGER_RNA_SYNTHESIS	REACTOME_VIRAL_MESSENGER_RNA_SYNTHESIS		14	-0.567099	-1.38484	0.086514	0.0884381	1	6865	tags=64%, list=22%, signal=82%
MAINTENANCE_OF_CELLULAR_PROTEIN_LOCALIZATION	MAINTENANCE_OF_CELLULAR_PROTEIN_LOCALIZATION		10	-0.632774	-1.38463	0.100233	0.0885222	1	5199	tags=60%, list=17%, signal=72%
GSE7218_IGM_VS_IGG_SIGNAL_THGOUGH_ANTIGEN_BCELL_UP	GSE7218_IGM_VS_IGG_SIGNAL_THGOUGH_ANTIGEN_BCELL_UP		179	-0.359393	-1.38427	0.00549451	0.0886661	1	4900	tags=42%, list=16%, signal=49%
GSE17721_LPS_VS_PAM3CSK4_1H_BMDM_UP	GSE17721_LPS_VS_PAM3CSK4_1H_BMDM_UP		182	-0.355626	-1.38422	0	0.0886516	1	4019	tags=30%, list=13%, signal=34%
GCM_SMARCC1	GCM_SMARCC1		35	-0.468146	-1.38391	0.0705882	0.0887979	1	5298	tags=46%, list=17%, signal=55%
GSE17721_CTRL_VS_CPG_1H_BMDM_UP	GSE17721_CTRL_VS_CPG_1H_BMDM_UP		185	-0.361883	-1.38386	0	0.0887771	1	3828	tags=26%, list=12%, signal=30%
LEE_CALORIE_RESTRICTION_MUSCLE_UP	LEE_CALORIE_RESTRICTION_MUSCLE_UP		35	-0.471978	-1.38343	0.0515759	0.0889796	1	3735	tags=26%, list=12%, signal=29%
GSE1460_NAIVE_CD4_TCELL_CORD_BLOOD_VS_THYMIC_STROMAL_CELL_DN	GSE1460_NAIVE_CD4_TCELL_CORD_BLOOD_VS_THYMIC_STROMAL_CELL_DN		189	-0.359656	-1.38299	0.00574713	0.0891756	1	4851	tags=38%, list=15%, signal=44%
GSE18893_CTRL_VS_TNF_TREATED_TCONV_24H_UP	GSE18893_CTRL_VS_TNF_TREATED_TCONV_24H_UP		186	-0.360235	-1.38255	0.0105263	0.0893907	1	5284	tags=37%, list=17%, signal=44%
HU_GENOTOXIN_ACTION_DIRECT_VS_INDIRECT_24HR	HU_GENOTOXIN_ACTION_DIRECT_VS_INDIRECT_24HR		47	-0.434558	-1.38228	0.0334347	0.0894966	1	6904	tags=51%, list=22%, signal=65%
GSE2405_0H_VS_9H_A_PHAGOCYTOPHILUM_STIM_NEUTROPHIL_DN	GSE2405_0H_VS_9H_A_PHAGOCYTOPHILUM_STIM_NEUTROPHIL_DN		193	-0.353187	-1.38211	0	0.0895448	1	4368	tags=28%, list=14%, signal=32%
GSE3982_MAC_VS_EFF_MEMORY_CD4_TCELL_UP	GSE3982_MAC_VS_EFF_MEMORY_CD4_TCELL_UP		187	-0.354115	-1.38192	0.0102564	0.089607	1	4566	tags=41%, list=15%, signal=47%
BYSTROEM_CORRELATED_WITH_IL5_UP	BYSTROEM_CORRELATED_WITH_IL5_UP		46	-0.4371	-1.38173	0.0345912	0.0896679	1	2550	tags=28%, list=8%, signal=31%
GSE2770_IL12_AND_TGFB_ACT_VS_ACT_CD4_TCELL_48H_UP	GSE2770_IL12_AND_TGFB_ACT_VS_ACT_CD4_TCELL_48H_UP		175	-0.355709	-1.38158	0	0.089703	1	5298	tags=37%, list=17%, signal=44%
GSE17721_LPS_VS_POLYIC_16H_BMDM_UP	GSE17721_LPS_VS_POLYIC_16H_BMDM_UP		188	-0.357851	-1.38147	0.0104712	0.089721	1	4328	tags=37%, list=14%, signal=42%
HANN_RESISTANCE_TO_BCL2_INHIBITOR_DN	HANN_RESISTANCE_TO_BCL2_INHIBITOR_DN		39	-0.459403	-1.38097	0.0508475	0.0899581	1	4098	tags=36%, list=13%, signal=41%
GSE3982_MAST_CELL_VS_NKCELL_UP	GSE3982_MAST_CELL_VS_NKCELL_UP		190	-0.358692	-1.38045	0	0.09021	1	3866	tags=32%, list=12%, signal=36%
SRC_UP.V1_DN	SRC_UP.V1_DN		145	-0.36544	-1.38032	0.0180995	0.0902511	1	2846	tags=26%, list=9%, signal=29%
SEMENZA_HIF1_TARGETS	SEMENZA_HIF1_TARGETS		34	-0.466735	-1.37987	0.0564972	0.090471	1	3490	tags=29%, list=11%, signal=33%
GSE13522_CTRL_VS_T_CRUZI_Y_STRAIN_INF_SKIN_IFNG_KO_UP	GSE13522_CTRL_VS_T_CRUZI_Y_STRAIN_INF_SKIN_IFNG_KO_UP		147	-0.359811	-1.37968	0.0140187	0.0905373	1	5013	tags=37%, list=16%, signal=44%
ZEMBUTSU_SENSITIVITY_TO_METHOTREXATE	ZEMBUTSU_SENSITIVITY_TO_METHOTREXATE		17	-0.543793	-1.37934	0.0992366	0.0907105	1	3367	tags=35%, list=11%, signal=40%
HUPER_BREAST_BASAL_VS_LUMINAL_UP	HUPER_BREAST_BASAL_VS_LUMINAL_UP		39	-0.454208	-1.37853	0.0352941	0.0911114	1	3966	tags=31%, list=13%, signal=35%
GSE29164_UNTREATED_VS_CD8_TCELL_TREATED_MELANOMA_DAY3_UP	GSE29164_UNTREATED_VS_CD8_TCELL_TREATED_MELANOMA_DAY3_UP		191	-0.353557	-1.37803	0.0104167	0.0913539	1	4704	tags=34%, list=15%, signal=39%
GSE360_HIGH_VS_LOW_DOSE_B_MALAYI_MAC_UP	GSE360_HIGH_VS_LOW_DOSE_B_MALAYI_MAC_UP		181	-0.360269	-1.3778	0	0.0914603	1	4455	tags=33%, list=14%, signal=38%
GSE17721_LPS_VS_GARDIQUIMOD_6H_BMDM_DN	GSE17721_LPS_VS_GARDIQUIMOD_6H_BMDM_DN		189	-0.354895	-1.37773	0.00980392	0.0914544	1	5013	tags=40%, list=16%, signal=47%
GSE6259_33D1_POS_DC_VS_BCELL_DN	GSE6259_33D1_POS_DC_VS_BCELL_DN		136	-0.369982	-1.37762	0.00934579	0.0914719	1	3422	tags=35%, list=11%, signal=39%
REACTOME_ANTIVIRAL_MECHANISM_BY_IFN_STIMULATED_GENES	REACTOME_ANTIVIRAL_MECHANISM_BY_IFN_STIMULATED_GENES		65	-0.412219	-1.37753	0.0208333	0.0914776	1	5562	tags=51%, list=18%, signal=62%
GSE42088_UNINF_VS_LEISHMANIA_INF_DC_24H_DN	GSE42088_UNINF_VS_LEISHMANIA_INF_DC_24H_DN		182	-0.354616	-1.37719	0.00476191	0.0916403	1	4231	tags=37%, list=13%, signal=42%
GSE46606_IRF4_KO_VS_WT_CD40L_IL2_IL5_1DAY_STIMULATED_BCELL_UP	GSE46606_IRF4_KO_VS_WT_CD40L_IL2_IL5_1DAY_STIMULATED_BCELL_UP		174	-0.361387	-1.37676	0.0052356	0.0918546	1	4201	tags=34%, list=13%, signal=39%
GSE37605_C57BL6_VS_NOD_FOXP3_FUSION_GFP_TCONV_UP	GSE37605_C57BL6_VS_NOD_FOXP3_FUSION_GFP_TCONV_UP		151	-0.360556	-1.37671	0.00873363	0.0918448	1	5284	tags=35%, list=17%, signal=42%
GSE7400_CTRL_VS_CSF3_IN_VIVO_TREATED_PBMC_DN	GSE7400_CTRL_VS_CSF3_IN_VIVO_TREATED_PBMC_DN		174	-0.360193	-1.37594	0.00497512	0.0922644	1	4138	tags=32%, list=13%, signal=36%
FOURNIER_ACINAR_DEVELOPMENT_LATE_DN	FOURNIER_ACINAR_DEVELOPMENT_LATE_DN		19	-0.533578	-1.37517	0.10989	0.0926977	1	3826	tags=74%, list=12%, signal=84%
CROONQUIST_NRAS_VS_STROMAL_STIMULATION_DN	CROONQUIST_NRAS_VS_STROMAL_STIMULATION_DN		93	-0.392018	-1.3751	0.0218182	0.092693	1	3428	tags=43%, list=11%, signal=48%
MORF_PPP2R5E	MORF_PPP2R5E		82	-0.398504	-1.37486	0.0228137	0.0927829	1	3204	tags=27%, list=10%, signal=30%
GSE4984_GALECTIN1_VS_LPS_STIM_DC_DN	GSE4984_GALECTIN1_VS_LPS_STIM_DC_DN		152	-0.364469	-1.37462	0.00458716	0.0928965	1	4810	tags=38%, list=15%, signal=45%
PETRETTO_HEART_MASS_QTL_CIS_DN	PETRETTO_HEART_MASS_QTL_CIS_DN		23	-0.500662	-1.3744	0.0775401	0.0929953	1	3514	tags=30%, list=11%, signal=34%
GSE14350_IL2RB_KO_VS_WT_TREG_UP	GSE14350_IL2RB_KO_VS_WT_TREG_UP		183	-0.362802	-1.37338	0	0.0935736	1	1941	tags=21%, list=6%, signal=23%
GSE17721_0.5H_VS_24H_LPS_BMDM_UP	GSE17721_0.5H_VS_24H_LPS_BMDM_UP		180	-0.347612	-1.37336	0.00518135	0.0935415	1	3747	tags=32%, list=12%, signal=36%
GSE41867_NAIVE_VS_DAY15_LCMV_CONE13_EFFECTOR_CD8_TCELL_DN	GSE41867_NAIVE_VS_DAY15_LCMV_CONE13_EFFECTOR_CD8_TCELL_DN		175	-0.354806	-1.3733	0	0.0935437	1	3245	tags=28%, list=10%, signal=31%
SMITH_TERT_TARGETS_UP	SMITH_TERT_TARGETS_UP		141	-0.365946	-1.37276	0.0045045	0.0938258	1	5662	tags=42%, list=18%, signal=51%
DEBIASI_APOPTOSIS_BY_REOVIRUS_INFECTION_DN	DEBIASI_APOPTOSIS_BY_REOVIRUS_INFECTION_DN		273	-0.339168	-1.37258	0	0.0938925	1	4599	tags=36%, list=15%, signal=41%
MODULE_331	MODULE_331		67	-0.417238	-1.37253	0.0207612	0.0938811	1	4379	tags=37%, list=14%, signal=43%
PATTERN_BINDING	PATTERN_BINDING		38	-0.450325	-1.37249	0.0458453	0.0938538	1	5623	tags=34%, list=18%, signal=42%
GSE30083_SP3_VS_SP4_THYMOCYTE_UP	GSE30083_SP3_VS_SP4_THYMOCYTE_UP		165	-0.358755	-1.37223	0.00520833	0.0939504	1	4681	tags=28%, list=15%, signal=33%
GNF2_CCNA1	GNF2_CCNA1		41	-0.441414	-1.37181	0.0481928	0.0941419	1	4319	tags=24%, list=14%, signal=28%
GSE26727_WT_VS_KLF2_KO_LPS_STIM_MACROPHAGE_DN	GSE26727_WT_VS_KLF2_KO_LPS_STIM_MACROPHAGE_DN		187	-0.35199	-1.37128	0.00588235	0.0944273	1	4140	tags=36%, list=13%, signal=42%
GRAHAM_CML_QUIESCENT_VS_NORMAL_QUIESCENT_UP	GRAHAM_CML_QUIESCENT_VS_NORMAL_QUIESCENT_UP		79	-0.402867	-1.37095	0.0252708	0.0945846	1	4002	tags=42%, list=13%, signal=48%
GSE17580_UNINFECTED_VS_S_MANSONI_INF_TREG_DN	GSE17580_UNINFECTED_VS_S_MANSONI_INF_TREG_DN		188	-0.350045	-1.37077	0	0.0946398	1	3779	tags=33%, list=12%, signal=37%
KEGG_PPAR_SIGNALING_PATHWAY	KEGG_PPAR_SIGNALING_PATHWAY		60	-0.415047	-1.37037	0.0434783	0.0948154	1	2732	tags=23%, list=9%, signal=26%
MICROTUBULE_MOTOR_ACTIVITY	MICROTUBULE_MOTOR_ACTIVITY		15	-0.56977	-1.36989	0.13	0.0950669	1	4775	tags=67%, list=15%, signal=79%
GSE3982_MAST_CELL_VS_EFF_MEMORY_CD4_TCELL_UP	GSE3982_MAST_CELL_VS_EFF_MEMORY_CD4_TCELL_UP		184	-0.351461	-1.36967	0.0111111	0.0951719	1	3430	tags=26%, list=11%, signal=29%
SOLUBLE_FRACTION	SOLUBLE_FRACTION		137	-0.371504	-1.36959	0.0135747	0.0951757	1	2661	tags=21%, list=8%, signal=23%
GNF2_PRDX2	GNF2_PRDX2		26	-0.48521	-1.36776	0.0888252	0.0962456	1	3318	tags=38%, list=11%, signal=43%
RESPONSE_TO_STRESS	RESPONSE_TO_STRESS		461	-0.32438	-1.36762	0	0.0962707	1	4077	tags=29%, list=13%, signal=33%
MITOTIC_SISTER_CHROMATID_SEGREGATION	MITOTIC_SISTER_CHROMATID_SEGREGATION		15	-0.550789	-1.36759	0.104116	0.0962339	1	4018	tags=53%, list=13%, signal=61%
REACTOME_REGULATION_OF_PYRUVATE_DEHYDROGENASE_PDH_COMPLEX	REACTOME_REGULATION_OF_PYRUVATE_DEHYDROGENASE_PDH_COMPLEX		11	-0.601798	-1.36685	0.136574	0.0966504	1	3229	tags=36%, list=10%, signal=41%
GSE24726_WT_VS_E2-2_KO_PDC_DAY4_POST_DELETION_DN	GSE24726_WT_VS_E2-2_KO_PDC_DAY4_POST_DELETION_DN		192	-0.345378	-1.36664	0	0.0967416	1	4912	tags=44%, list=16%, signal=52%
KIM_ALL_DISORDERS_DURATION_CORR_DN	KIM_ALL_DISORDERS_DURATION_CORR_DN		133	-0.371537	-1.36663	0.0197044	0.0966996	1	5085	tags=44%, list=16%, signal=53%
CHR1P35	CHR1P35		83	-0.395411	-1.36661	0.0306513	0.0966615	1	6610	tags=42%, list=21%, signal=53%
GSE8835_CD4_VS_CD8_TCELL_UP	GSE8835_CD4_VS_CD8_TCELL_UP		185	-0.353377	-1.36589	0.0111732	0.0970779	1	5016	tags=38%, list=16%, signal=45%
FERRANDO_TAL1_NEIGHBORS	FERRANDO_TAL1_NEIGHBORS		18	-0.531914	-1.36588	0.0987342	0.0970348	1	1837	tags=39%, list=6%, signal=41%
WHITFIELD_CELL_CYCLE_M_G1	WHITFIELD_CELL_CYCLE_M_G1		135	-0.369792	-1.36581	0.00888889	0.0970159	1	3250	tags=31%, list=10%, signal=35%
GGAMTNNNNNTCCY_UNKNOWN	GGAMTNNNNNTCCY_UNKNOWN		105	-0.368379	-1.36455	0.0167364	0.0977735	1	6150	tags=43%, list=20%, signal=53%
PID_CIRCADIAN_PATHWAY	PID_CIRCADIAN_PATHWAY		16	-0.561765	-1.36407	0.101604	0.098008	1	3969	tags=44%, list=13%, signal=50%
GSE17974_CTRL_VS_ACT_IL4_AND_ANTI_IL12_72H_CD4_TCELL_DN	GSE17974_CTRL_VS_ACT_IL4_AND_ANTI_IL12_72H_CD4_TCELL_DN		184	-0.348967	-1.36372	0.00480769	0.0981883	1	4506	tags=35%, list=14%, signal=40%
MODULE_321	MODULE_321		105	-0.378874	-1.36371	0.0176211	0.0981404	1	3245	tags=32%, list=10%, signal=36%
LABBE_WNT3A_TARGETS_UP	LABBE_WNT3A_TARGETS_UP		97	-0.381188	-1.36364	0.0199203	0.0981366	1	3422	tags=36%, list=11%, signal=40%
GSE3982_MAC_VS_NEUTROPHIL_LPS_STIM_UP	GSE3982_MAC_VS_NEUTROPHIL_LPS_STIM_UP		194	-0.350259	-1.36342	0	0.0982228	1	3919	tags=34%, list=12%, signal=38%
GSE5503_PLN_DC_VS_SPLEEN_DC_ACTIVATED_ALLOGENIC_TCELL_UP	GSE5503_PLN_DC_VS_SPLEEN_DC_ACTIVATED_ALLOGENIC_TCELL_UP		178	-0.35147	-1.36338	0.00956938	0.0981961	1	4427	tags=31%, list=14%, signal=36%
REACTOME_KERATAN_SULFATE_BIOSYNTHESIS	REACTOME_KERATAN_SULFATE_BIOSYNTHESIS		24	-0.505736	-1.36296	0.0649351	0.0984075	1	4336	tags=42%, list=14%, signal=48%
GSE27786_CD4_TCELL_VS_MONO_MAC_UP	GSE27786_CD4_TCELL_VS_MONO_MAC_UP		191	-0.348801	-1.36276	0.00507614	0.0984829	1	4300	tags=35%, list=14%, signal=40%
GSE22229_RENAL_TRANSPLANT_IMMUNOSUPP_THERAPY_VS_HEALTHY_PBMC_UP	GSE22229_RENAL_TRANSPLANT_IMMUNOSUPP_THERAPY_VS_HEALTHY_PBMC_UP		179	-0.358035	-1.36151	0.0150754	0.0992029	1	3966	tags=34%, list=13%, signal=39%
PENG_GLUCOSE_DEPRIVATION_UP	PENG_GLUCOSE_DEPRIVATION_UP		43	-0.438732	-1.36096	0.0464396	0.099486	1	3634	tags=37%, list=12%, signal=42%
KEGG_GLYCEROLIPID_METABOLISM	KEGG_GLYCEROLIPID_METABOLISM		45	-0.435699	-1.36085	0.0457143	0.0995128	1	2320	tags=27%, list=7%, signal=29%
REACTOME_HIGHLY_CALCIUM_PERMEABLE_POSTSYNAPTIC_NICOTINIC_ACETYLCHOLINE_RECEPTORS	REACTOME_HIGHLY_CALCIUM_PERMEABLE_POSTSYNAPTIC_NICOTINIC_ACETYLCHOLINE_RECEPTORS		12	-0.578478	-1.36078	0.122353	0.0995041	1	3706	tags=25%, list=12%, signal=28%
MODULE_212	MODULE_212		301	-0.330421	-1.36062	0	0.0995476	1	4962	tags=35%, list=16%, signal=41%
GSE15139_GMCSF_TREATED_VS_UNTREATED_NEUTROPHILS_DN	GSE15139_GMCSF_TREATED_VS_UNTREATED_NEUTROPHILS_DN		192	-0.351102	-1.36059	0.00490196	0.0995173	1	4957	tags=41%, list=16%, signal=48%
REACTOME_INHIBITION_OF_REPLICATION_INITIATION_OF_DAMAGED_DNA_BY_RB1_E2F1	REACTOME_INHIBITION_OF_REPLICATION_INITIATION_OF_DAMAGED_DNA_BY_RB1_E2F1		11	-0.60346	-1.36024	0.118605	0.0996817	1	2880	tags=55%, list=9%, signal=60%
GSE17721_CPG_VS_GARDIQUIMOD_12H_BMDM_DN	GSE17721_CPG_VS_GARDIQUIMOD_12H_BMDM_DN		176	-0.35553	-1.36015	0	0.0996874	1	2935	tags=27%, list=9%, signal=30%
GSE2770_TGFB_AND_IL4_VS_IL4_TREATED_ACT_CD4_TCELL_2H_DN	GSE2770_TGFB_AND_IL4_VS_IL4_TREATED_ACT_CD4_TCELL_2H_DN		172	-0.356196	-1.35988	0.0111732	0.0998093	1	5826	tags=35%, list=19%, signal=43%
GSE25087_FETAL_VS_ADULT_TCONV_UP	GSE25087_FETAL_VS_ADULT_TCONV_UP		188	-0.350786	-1.35962	0	0.0999315	1	3426	tags=33%, list=11%, signal=37%
GSE3982_DC_VS_NEUTROPHIL_UP	GSE3982_DC_VS_NEUTROPHIL_UP		188	-0.355014	-1.35938	0.00546448	0.100034	1	3782	tags=34%, list=12%, signal=38%
GSE27786_NKCELL_VS_NEUTROPHIL_UP	GSE27786_NKCELL_VS_NEUTROPHIL_UP		194	-0.351019	-1.35892	0.00507614	0.100278	1	4296	tags=35%, list=14%, signal=40%
DNA_DAMAGE_CHECKPOINT	DNA_DAMAGE_CHECKPOINT		19	-0.530232	-1.35888	0.091623	0.100258	1	6344	tags=58%, list=20%, signal=72%
TMTCGCGANR_UNKNOWN	TMTCGCGANR_UNKNOWN		153	-0.362997	-1.35856	0.00469484	0.100406	1	4843	tags=35%, list=15%, signal=42%
GSE17721_LPS_VS_GARDIQUIMOD_12H_BMDM_DN	GSE17721_LPS_VS_GARDIQUIMOD_12H_BMDM_DN		185	-0.353124	-1.35845	0.0217391	0.100418	1	3055	tags=26%, list=10%, signal=29%
CELLULAR_LIPID_METABOLIC_PROCESS	CELLULAR_LIPID_METABOLIC_PROCESS		225	-0.342763	-1.35781	0	0.100785	1	3648	tags=24%, list=12%, signal=26%
GSE6259_FLT3L_INDUCED_DEC205_POS_DC_VS_CD4_TCELL_UP	GSE6259_FLT3L_INDUCED_DEC205_POS_DC_VS_CD4_TCELL_UP		154	-0.360859	-1.35779	0.00480769	0.100746	1	3976	tags=33%, list=13%, signal=38%
GSE17721_LPS_VS_POLYIC_12H_BMDM_UP	GSE17721_LPS_VS_POLYIC_12H_BMDM_UP		190	-0.349267	-1.35713	0.00555556	0.101114	1	4076	tags=32%, list=13%, signal=36%
[truncated: 1,890 more rows]

## Sheet: OCIAML2_GSEA_report_up
Data S2, related to Figure 4: Transcriptome and chromatin accessibility profiling.
NAME	GS<br> follow link to MSigDB	GS DETAILS	SIZE	ES	NES	NOM p-val	FDR q-val	FWER p-val	RANK AT MAX	LEADING EDGE
STK33_UP	STK33_UP	Details ...	263	0.682871	2.35388	0	0	0	4158	tags=48%, list=13%, signal=55%
STK33_SKM_UP	STK33_SKM_UP	Details ...	257	0.680376	2.33219	0	0	0	4310	tags=47%, list=14%, signal=55%
GSE16450_IMMATURE_VS_MATURE_NEURON_CELL_LINE_UP	GSE16450_IMMATURE_VS_MATURE_NEURON_CELL_LINE_UP	Details ...	167	0.70285	2.31855	0	0	0	4754	tags=58%, list=15%, signal=68%
ODONNELL_TARGETS_OF_MYC_AND_TFRC_UP	ODONNELL_TARGETS_OF_MYC_AND_TFRC_UP	Details ...	77	0.769011	2.3117	0	0	0	2527	tags=51%, list=8%, signal=55%
GSE26156_DOUBLE_POSITIVE_VS_CD4_SINGLE_POSITIVE_THYMOCYTE_UP	GSE26156_DOUBLE_POSITIVE_VS_CD4_SINGLE_POSITIVE_THYMOCYTE_UP	Details ...	185	0.692371	2.30614	0	0	0	4480	tags=47%, list=14%, signal=55%
GSE17974_0H_VS_24H_IN_VITRO_ACT_CD4_TCELL_UP	GSE17974_0H_VS_24H_IN_VITRO_ACT_CD4_TCELL_UP	Details ...	167	0.690838	2.27745	0	0	0	5379	tags=59%, list=17%, signal=70%
GSE24634_NAIVE_CD4_TCELL_VS_DAY3_IL4_CONV_TREG_UP	GSE24634_NAIVE_CD4_TCELL_VS_DAY3_IL4_CONV_TREG_UP	Details ...	180	0.661628	2.23256	0	0	0	4372	tags=47%, list=14%, signal=55%
GSE19888_CTRL_VS_A3R_INHIBITOR_TREATED_MAST_CELL_DN	GSE19888_CTRL_VS_A3R_INHIBITOR_TREATED_MAST_CELL_DN	Details ...	173	0.672928	2.23149	0	0	0	4739	tags=58%, list=15%, signal=68%
TONKS_TARGETS_OF_RUNX1_RUNX1T1_FUSION_HSC_UP	TONKS_TARGETS_OF_RUNX1_RUNX1T1_FUSION_HSC_UP	Details ...	165	0.669945	2.20148	0	0	0	4272	tags=45%, list=14%, signal=52%
TAKEDA_TARGETS_OF_NUP98_HOXA9_FUSION_3D_UP	TAKEDA_TARGETS_OF_NUP98_HOXA9_FUSION_3D_UP	Details ...	161	0.666698	2.18063	0	0	0	4343	tags=48%, list=14%, signal=55%
MORI_PRE_BI_LYMPHOCYTE_DN	MORI_PRE_BI_LYMPHOCYTE_DN	Details ...	72	0.729326	2.17934	0	0	0	5473	tags=69%, list=17%, signal=84%
GSE32986_UNSTIM_VS_GMCSF_AND_CURDLAN_LOWDOSE_STIM_DC_DN	GSE32986_UNSTIM_VS_GMCSF_AND_CURDLAN_LOWDOSE_STIM_DC_DN	Details ...	183	0.654071	2.17715	0	0	0	5216	tags=53%, list=17%, signal=63%
GSE3982_MEMORY_CD4_TCELL_VS_TH2_UP	GSE3982_MEMORY_CD4_TCELL_VS_TH2_UP	Details ...	177	0.648472	2.16489	0	0	0	5564	tags=51%, list=18%, signal=62%
GSE36476_CTRL_VS_TSST_ACT_40H_MEMORY_CD4_TCELL_YOUNG_UP	GSE36476_CTRL_VS_TSST_ACT_40H_MEMORY_CD4_TCELL_YOUNG_UP	Details ...	183	0.653266	2.16402	0	0	0	3622	tags=46%, list=12%, signal=52%
STK33_NOMO_UP	STK33_NOMO_UP	Details ...	262	0.626816	2.16176	0	0	0	4171	tags=45%, list=13%, signal=51%
GSE1460_INTRATHYMIC_T_PROGENITOR_VS_CD4_THYMOCYTE_DN	GSE1460_INTRATHYMIC_T_PROGENITOR_VS_CD4_THYMOCYTE_DN	Details ...	183	0.652306	2.1572	0	0	0	4232	tags=44%, list=13%, signal=51%
MTOR_UP.N4.V1_DN	MTOR_UP.N4.V1_DN	Details ...	166	0.64891	2.15674	0	0	0	2976	tags=39%, list=9%, signal=43%
GSE32986_UNSTIM_VS_CURDLAN_HIGHDOSE_STIM_DC_DN	GSE32986_UNSTIM_VS_CURDLAN_HIGHDOSE_STIM_DC_DN	Details ...	181	0.648522	2.15281	0	0	0	5216	tags=54%, list=17%, signal=64%
HALLMARK_INTERFERON_ALPHA_RESPONSE	HALLMARK_INTERFERON_ALPHA_RESPONSE	Details ...	93	0.687294	2.15026	0	0	0	3635	tags=47%, list=12%, signal=53%
GSE16450_CTRL_VS_IFNA_6H_STIM_IMMATURE_NEURON_CELL_LINE_DN	GSE16450_CTRL_VS_IFNA_6H_STIM_IMMATURE_NEURON_CELL_LINE_DN	Details ...	174	0.642105	2.14102	0	0	0	3909	tags=47%, list=12%, signal=54%
GSE21360_PRIMARY_VS_QUATERNARY_MEMORY_CD8_TCELL_DN	GSE21360_PRIMARY_VS_QUATERNARY_MEMORY_CD8_TCELL_DN	Details ...	191	0.637392	2.13812	0	0	0	5699	tags=58%, list=18%, signal=71%
GSE3982_MEMORY_CD4_TCELL_VS_TH1_UP	GSE3982_MEMORY_CD4_TCELL_VS_TH1_UP	Details ...	182	0.647154	2.1359	0	0	0	4900	tags=48%, list=16%, signal=57%
GSE21546_UNSTIM_VS_ANTI_CD3_STIM_SAP1A_KO_DP_THYMOCYTES_UP	GSE21546_UNSTIM_VS_ANTI_CD3_STIM_SAP1A_KO_DP_THYMOCYTES_UP	Details ...	172	0.644837	2.13432	0	0	0	5091	tags=51%, list=16%, signal=60%
HALLMARK_INTERFERON_GAMMA_RESPONSE	HALLMARK_INTERFERON_GAMMA_RESPONSE	Details ...	190	0.638548	2.1338	0	0	0	4224	tags=42%, list=13%, signal=48%
GSE43863_TH1_VS_TFH_MEMORY_CD4_TCELL_DN	GSE43863_TH1_VS_TFH_MEMORY_CD4_TCELL_DN	Details ...	186	0.641621	2.13283	0	0	0	5429	tags=50%, list=17%, signal=60%
GSE22886_TH1_VS_TH2_48H_ACT_DN	GSE22886_TH1_VS_TH2_48H_ACT_DN	Details ...	186	0.641098	2.13116	0	0	0	4917	tags=51%, list=16%, signal=60%
GSE6259_BCELL_VS_CD8_TCELL_UP	GSE6259_BCELL_VS_CD8_TCELL_UP	Details ...	171	0.640581	2.12353	0	3.45e-05	0.001	3800	tags=44%, list=12%, signal=50%
GRAHAM_CML_DIVIDING_VS_NORMAL_QUIESCENT_DN	GRAHAM_CML_DIVIDING_VS_NORMAL_QUIESCENT_DN	Details ...	84	0.6956	2.12284	0	3.33e-05	0.001	4016	tags=45%, list=13%, signal=52%
GNF2_PTPRC	GNF2_PTPRC	Details ...	67	0.712375	2.11828	0	3.22e-05	0.001	4754	tags=60%, list=15%, signal=70%
MORI_MATURE_B_LYMPHOCYTE_UP	MORI_MATURE_B_LYMPHOCYTE_UP	Details ...	87	0.68664	2.11506	0	3.11e-05	0.001	3644	tags=54%, list=12%, signal=61%
GSE17974_CTRL_VS_ACT_IL4_AND_ANTI_IL12_24H_CD4_TCELL_UP	GSE17974_CTRL_VS_ACT_IL4_AND_ANTI_IL12_24H_CD4_TCELL_UP	Details ...	174	0.642333	2.11487	0	3.01e-05	0.001	4727	tags=49%, list=15%, signal=57%
GSE13547_2H_VS_12_H_ANTI_IGM_STIM_ZFX_KO_BCELL_UP	GSE13547_2H_VS_12_H_ANTI_IGM_STIM_ZFX_KO_BCELL_UP	Details ...	154	0.642614	2.11014	0	2.91e-05	0.001	5360	tags=47%, list=17%, signal=56%
GSE21927_C26GM_VS_4T1_TUMOR_MONOCYTE_BALBC_DN	GSE21927_C26GM_VS_4T1_TUMOR_MONOCYTE_BALBC_DN	Details ...	187	0.635445	2.109	0	2.83e-05	0.001	5028	tags=50%, list=16%, signal=59%
TONKS_TARGETS_OF_RUNX1_RUNX1T1_FUSION_MONOCYTE_DN	TONKS_TARGETS_OF_RUNX1_RUNX1T1_FUSION_MONOCYTE_DN	Details ...	49	0.744169	2.10853	0	2.74e-05	0.001	2639	tags=39%, list=8%, signal=42%
GSE19888_ADENOSINE_A3R_INH_VS_ACT_WITH_INHIBITOR_PRETREATMENT_IN_MAST_CELL_UP	GSE19888_ADENOSINE_A3R_INH_VS_ACT_WITH_INHIBITOR_PRETREATMENT_IN_MAST_CELL_UP	Details ...	168	0.64188	2.10532	0	2.66e-05	0.001	4007	tags=37%, list=13%, signal=42%
GSE24574_BCL6_HIGH_TFH_VS_TFH_CD4_TCELL_DN	GSE24574_BCL6_HIGH_TFH_VS_TFH_CD4_TCELL_DN	Details ...	192	0.622085	2.09969	0	2.59e-05	0.001	5557	tags=52%, list=18%, signal=63%
GSE21927_SPLEEN_C57BL6_VS_EL4_TUMOR_BALBC_MONOCYTES_UP	GSE21927_SPLEEN_C57BL6_VS_EL4_TUMOR_BALBC_MONOCYTES_UP	Details ...	191	0.632132	2.09802	0	2.52e-05	0.001	5035	tags=52%, list=16%, signal=62%
GSE37532_TREG_VS_TCONV_PPARG_KO_CD4_TCELL_FROM_VISCERAL_ADIPOSE_TISSUE_DN	GSE37532_TREG_VS_TCONV_PPARG_KO_CD4_TCELL_FROM_VISCERAL_ADIPOSE_TISSUE_DN	Details ...	190	0.627009	2.09759	0	2.45e-05	0.001	5402	tags=52%, list=17%, signal=63%
ZHANG_TLX_TARGETS_60HR_UP	ZHANG_TLX_TARGETS_60HR_UP	Details ...	271	0.607991	2.09722	0	2.39e-05	0.001	3546	tags=33%, list=11%, signal=37%
KRIGE_RESPONSE_TO_TOSEDOSTAT_24HR_UP	KRIGE_RESPONSE_TO_TOSEDOSTAT_24HR_UP	Details ...	724	0.575014	2.09522	0	2.33e-05	0.001	3951	tags=44%, list=13%, signal=49%
MISSIAGLIA_REGULATED_BY_METHYLATION_UP	MISSIAGLIA_REGULATED_BY_METHYLATION_UP	Details ...	114	0.653112	2.09518	0	2.27e-05	0.001	4506	tags=48%, list=14%, signal=56%
VILIMAS_NOTCH1_TARGETS_UP	VILIMAS_NOTCH1_TARGETS_UP	Details ...	42	0.757954	2.09487	0	2.22e-05	0.001	1629	tags=36%, list=5%, signal=38%
GSE21927_SPLENIC_VS_TUMOR_MONOCYTES_FROM_C26GM_TUMOROUS_MICE_BALBC_DN	GSE21927_SPLENIC_VS_TUMOR_MONOCYTES_FROM_C26GM_TUMOROUS_MICE_BALBC_DN	Details ...	190	0.625895	2.09317	0	2.17e-05	0.001	5609	tags=54%, list=18%, signal=66%
GSE12366_GC_VS_MEMORY_BCELL_DN	GSE12366_GC_VS_MEMORY_BCELL_DN	Details ...	186	0.627967	2.09256	0	2.12e-05	0.001	4197	tags=42%, list=13%, signal=49%
ZHANG_TLX_TARGETS_UP	ZHANG_TLX_TARGETS_UP	Details ...	100	0.678669	2.08795	0	2.07e-05	0.001	2184	tags=28%, list=7%, signal=30%
GSE18893_TCONV_VS_TREG_2H_TNF_STIM_DN	GSE18893_TCONV_VS_TREG_2H_TNF_STIM_DN	Details ...	178	0.622703	2.085	0	2.03e-05	0.001	4727	tags=51%, list=15%, signal=59%
GSE19888_ADENOSINE_A3R_INH_PRETREAT_AND_ACT_BY_A3R_VS_A3R_INH_AND_TCELL_MEMBRANES_ACT_MAST_CELL_UP	GSE19888_ADENOSINE_A3R_INH_PRETREAT_AND_ACT_BY_A3R_VS_A3R_INH_AND_TCELL_MEMBRANES_ACT_MAST_CELL_UP	Details ...	174	0.626134	2.08433	0	1.98e-05	0.001	4739	tags=55%, list=15%, signal=65%
GSE18791_CTRL_VS_NEWCASTLE_VIRUS_DC_16H_DN	GSE18791_CTRL_VS_NEWCASTLE_VIRUS_DC_16H_DN	Details ...	172	0.632751	2.07939	0	1.94e-05	0.001	2845	tags=40%, list=9%, signal=43%
WINTER_HYPOXIA_DN	WINTER_HYPOXIA_DN	Details ...	45	0.748866	2.07818	0	1.9e-05	0.001	3995	tags=53%, list=13%, signal=61%
GSE22229_RENAL_TRANSPLANT_VS_HEALTHY_PBMC_DN	GSE22229_RENAL_TRANSPLANT_VS_HEALTHY_PBMC_DN	Details ...	177	0.624297	2.07174	0	1.87e-05	0.001	3656	tags=41%, list=12%, signal=46%
RUIZ_TNC_TARGETS_UP	RUIZ_TNC_TARGETS_UP	Details ...	141	0.637794	2.06922	0	1.83e-05	0.001	5225	tags=49%, list=17%, signal=58%
DUTERTRE_ESTRADIOL_RESPONSE_24HR_DN	DUTERTRE_ESTRADIOL_RESPONSE_24HR_DN	Details ...	471	0.581342	2.06881	0	1.79e-05	0.001	5349	tags=42%, list=17%, signal=50%
GSE17974_CTRL_VS_ACT_IL4_AND_ANTI_IL12_12H_CD4_TCELL_UP	GSE17974_CTRL_VS_ACT_IL4_AND_ANTI_IL12_12H_CD4_TCELL_UP	Details ...	170	0.626706	2.06617	0	1.76e-05	0.001	4147	tags=45%, list=13%, signal=51%
WIERENGA_STAT5A_TARGETS_GROUP2	WIERENGA_STAT5A_TARGETS_GROUP2	Details ...	54	0.724399	2.06557	0	1.73e-05	0.001	3133	tags=46%, list=10%, signal=51%
GSE22886_UNSTIM_VS_IL15_STIM_NKCELL_UP	GSE22886_UNSTIM_VS_IL15_STIM_NKCELL_UP	Details ...	167	0.627165	2.06518	0	1.7e-05	0.001	5054	tags=50%, list=16%, signal=60%
GSE46606_UNSTIM_VS_CD40L_IL2_IL5_DAY3_STIMULATED_BCELL_UP	GSE46606_UNSTIM_VS_CD40L_IL2_IL5_DAY3_STIMULATED_BCELL_UP	Details ...	176	0.616098	2.05944	0	3.34e-05	0.002	5651	tags=46%, list=18%, signal=56%
TAKEDA_TARGETS_OF_NUP98_HOXA9_FUSION_8D_UP	TAKEDA_TARGETS_OF_NUP98_HOXA9_FUSION_8D_UP	Details ...	133	0.640753	2.05053	0	6.57e-05	0.004	4275	tags=47%, list=14%, signal=54%
TAKEDA_TARGETS_OF_NUP98_HOXA9_FUSION_10D_UP	TAKEDA_TARGETS_OF_NUP98_HOXA9_FUSION_10D_UP	Details ...	168	0.620344	2.05001	0	6.45e-05	0.004	4343	tags=46%, list=14%, signal=53%
GSE21670_UNTREATED_VS_IL6_TREATED_STAT3_KO_CD4_TCELL_UP	GSE21670_UNTREATED_VS_IL6_TREATED_STAT3_KO_CD4_TCELL_UP	Details ...	189	0.609474	2.0497	0	6.34e-05	0.004	2882	tags=36%, list=9%, signal=39%
GSE40666_UNTREATED_VS_IFNA_STIM_STAT4_KO_EFFECTOR_CD8_TCELL_90MIN_DN	GSE40666_UNTREATED_VS_IFNA_STIM_STAT4_KO_EFFECTOR_CD8_TCELL_90MIN_DN	Details ...	180	0.613457	2.04969	0	6.24e-05	0.004	3637	tags=38%, list=12%, signal=43%
KOBAYASHI_EGFR_SIGNALING_24HR_UP	KOBAYASHI_EGFR_SIGNALING_24HR_UP	Details ...	89	0.668232	2.0491	0	6.14e-05	0.004	1515	tags=39%, list=5%, signal=41%
GSE28408_LY6G_POS_VS_NEG_DC_UP	GSE28408_LY6G_POS_VS_NEG_DC_UP	Details ...	184	0.610942	2.04588	0	6.04e-05	0.004	3737	tags=45%, list=12%, signal=50%
ZHAN_MULTIPLE_MYELOMA_PR_DN	ZHAN_MULTIPLE_MYELOMA_PR_DN	Details ...	42	0.753158	2.04455	0	5.94e-05	0.004	3104	tags=60%, list=10%, signal=66%
GSE22886_UNSTIM_VS_IL2_STIM_NKCELL_UP	GSE22886_UNSTIM_VS_IL2_STIM_NKCELL_UP	Details ...	179	0.612078	2.04258	0	5.85e-05	0.004	4941	tags=48%, list=16%, signal=57%
LINDSTEDT_DENDRITIC_CELL_MATURATION_B	LINDSTEDT_DENDRITIC_CELL_MATURATION_B	Details ...	51	0.731333	2.04049	0	5.76e-05	0.004	1781	tags=45%, list=6%, signal=48%
GSE45739_NRAS_KO_VS_WT_ACD3_ACD28_STIM_CD4_TCELL_DN	GSE45739_NRAS_KO_VS_WT_ACD3_ACD28_STIM_CD4_TCELL_DN	Details ...	179	0.613072	2.04026	0	5.67e-05	0.004	4797	tags=49%, list=15%, signal=57%
GSE7568_IL4_TGFB_DEXAMETHASONE_VS_IL4_TGFB_TREATED_MACROPHAGE_DN	GSE7568_IL4_TGFB_DEXAMETHASONE_VS_IL4_TGFB_TREATED_MACROPHAGE_DN	Details ...	168	0.614735	2.03985	0	5.59e-05	0.004	5258	tags=48%, list=17%, signal=57%
ACCAATC,MIR-509	ACCAATC,MIR-509	Details ...	38	0.7437	2.03771	0	5.51e-05	0.004	923	tags=26%, list=3%, signal=27%
GSE21546_WT_VS_SAP1A_KO_AND_ELK1_KO_ANTI_CD3_STIM_DP_THYMOCYTES_UP	GSE21546_WT_VS_SAP1A_KO_AND_ELK1_KO_ANTI_CD3_STIM_DP_THYMOCYTES_UP	Details ...	174	0.618266	2.03606	0	5.43e-05	0.004	5150	tags=42%, list=16%, signal=50%
GSE37533_PPARG1_FOXP3_VS_FOXP3_TRANSDUCED_CD4_TCELL_DN	GSE37533_PPARG1_FOXP3_VS_FOXP3_TRANSDUCED_CD4_TCELL_DN	Details ...	193	0.6106	2.0359	0	5.35e-05	0.004	4576	tags=41%, list=15%, signal=48%
BASSO_CD40_SIGNALING_UP	BASSO_CD40_SIGNALING_UP	Details ...	97	0.647215	2.03225	0	5.27e-05	0.004	3592	tags=40%, list=11%, signal=45%
GSE21063_CTRL_VS_ANTI_IGM_STIM_BCELL_NFATC1_KO_3H_DN	GSE21063_CTRL_VS_ANTI_IGM_STIM_BCELL_NFATC1_KO_3H_DN	Details ...	173	0.615395	2.03131	0	5.2e-05	0.004	4431	tags=45%, list=14%, signal=52%
BASSO_HAIRY_CELL_LEUKEMIA_DN	BASSO_HAIRY_CELL_LEUKEMIA_DN	Details ...	76	0.679887	2.03079	0	5.13e-05	0.004	4310	tags=47%, list=14%, signal=55%
ODONNELL_TFRC_TARGETS_UP	ODONNELL_TFRC_TARGETS_UP	Details ...	359	0.573688	2.02992	0	5.06e-05	0.004	3528	tags=31%, list=11%, signal=34%
GSE42021_CD24INT_VS_CD24LOW_TCONV_THYMUS_DN	GSE42021_CD24INT_VS_CD24LOW_TCONV_THYMUS_DN	Details ...	176	0.606583	2.02407	0	7.48e-05	0.006	5495	tags=49%, list=17%, signal=60%
GSE24634_TEFF_VS_TCONV_DAY5_IN_CULTURE_DN	GSE24634_TEFF_VS_TCONV_DAY5_IN_CULTURE_DN	Details ...	186	0.608173	2.02361	0	7.38e-05	0.006	2737	tags=34%, list=9%, signal=37%
GSE21546_WT_VS_SAP1A_KO_AND_ELK1_KO_DP_THYMOCYTES_DN	GSE21546_WT_VS_SAP1A_KO_AND_ELK1_KO_DP_THYMOCYTES_DN	Details ...	183	0.615154	2.023	0	7.29e-05	0.006	3888	tags=43%, list=12%, signal=48%
GRAHAM_NORMAL_QUIESCENT_VS_NORMAL_DIVIDING_UP	GRAHAM_NORMAL_QUIESCENT_VS_NORMAL_DIVIDING_UP	Details ...	61	0.694474	2.02127	0	7.19e-05	0.006	4016	tags=49%, list=13%, signal=56%
[truncated: 8,721 more rows]

## Sheet: ATACseq_RNAseq_withMotif
Data S2, related to Figure 4: Transcriptomic and chromatin accessibility profiling.
[truncated: 263 more rows]
