# Supplementary material for: MEF2C Phosphorylation Is Required for Chemotherapy Resistance in Acute Myeloid Leukemia
Source: Oxford University Press journal article supplement (doi:10.1158/2159-8290.cd-17-1271), 2018-02-08
Supplement: 21598290cd171271-sup-192326_2_supp_4527693_p33ncw.xlsx [file 21598290cd171271-sup-192326_2_supp_4527693_p33ncw.xlsx]

## Sheet: PhosphoQuant
Data S1: Phosphoproteomics_ITRAQ_Summary
Filter Key	Protein Rank	Accession Number	Protein Redundancy	Protein Description	Protein Masses	Protein Mass	Protein Matches	Protein Score	Peptide Sequence	Variable Modifications	Protein-Relative Modifications	Experimental mz	Charge	Predicted mr	Delta	Peptide Score	Peptide Rank	Start Position	End Position	Preceding Residue	Following Residue	Missed Cleavages	Spectrum Description	Query	GeneName	Protein Relative Modifications	Kinase?	Matches	Unique	FDR	Scan Type	Found in Other File?	Same Sequence?	Same Modifications?	Other Peptide Score	Score Difference	Peptide Count	Top Peptide Score	Summed 113	Summed 114	Summed 115	Summed 116	Summed 117	Summed 118	Summed 119	Summed 121	Max 113	Max 114	Max 115
RLSADIR|S3: Phospho	167	gi|150170729|ref|NP_055831.1|	1	microtubule associated serine/threonine kinase 3 [Homo sapiens]	158449	158449	1	21	RLSADIR	S3: Phospho	S747: Phospho	405.556	3	1213.65	-0.002299	21.07	1	745	751	R	L	1	2012-08-10-Look-iTRAQ-pST-9-230.3233.3233.3.dta - 405.55620|212|417|393|804|212|406|1120|1337	819	['MAST3']	S747: Phospho				0.00310559	HCD	No	N/A	N/A	N/A	N/A	1	21.07	212	417	393	804	212	406	1120	1337	212	417	393
DGSGQEK|S3: Phospho	192	gi|21361416|ref|NP_036382.2|	1	related RAS viral (r-ras) oncogene homolog 2 isoform a [Homo sapiens]	27872	27872	1	16	DGSGQEK	S3: Phospho	S10: Phospho	470.237	3	1407.69	0.004134	15.8	1	8	14	R	Y	0	2012-08-10-Look-iTRAQ-pST-0-700.4103.4103.3.dta - 470.23720|209|209|209|960|209|209|2506|2659	1059	['RRAS2']	S10: Phospho				0.00742574	CID	No	N/A	N/A	N/A	N/A	1	15.8	209	209	209	960	209	209	2506	2659	209	209	209
QLSSGVSEIR|S3: Phospho	41	gi|ETD6|SYNPHOSPHO2|; gi|4504517|ref|NP_001531.1|	2	Marto_Lab (standards) SYN PHOSPHO 2; heat shock protein beta-1 [Homo sapiens]	1922; 25259	1922	2	55	QLSSGVSEIR	S3: Phospho	S7: Phospho	730.373	2	1458.74	-0.006754	47.85	1	5	14	R	-	0	2012-08-10-Look-iTRAQ-pST-9-700.3223.3223.2.dta - 730.37350|756|1863|6301|4763|2673|1211|18518|1239	606	['NA', 'HSPB1']	S7: Phospho	FALSE	['NA']	FALSE	0	HCD	Yes	Yes	Yes	28.45	19.4	4	56.67	1366	4475	15347	11948	6327	3057	42024	4118	756	1863	6301
RLSLDSSCLDSSR|S3: Phospho	101	gi|16306568|ref|NP_075045.2|	1	poly(A) polymerase gamma [Homo sapiens]	99216	99216	1	34	RLSLDSSCLDSSR	S3: Phospho	S525: Phospho	627.3	3	1878.88	-0.002515	34.48	1	523	535	K	D	1	2012-08-10-Look-iTRAQ-pST-13-230.3414.3414.3.dta - 627.30090|307|363|720|709|211|876|1632|766	1573	['PAPOLG']	S525: Phospho	FALSE	['NA']	FALSE	0	HCD	Yes	Yes	Yes	17.91	16.57	1	34.48	307	363	720	709	211	876	1632	766	307	363	720
RTPTPLALR|T2: Phospho; T4: Phospho	192	gi|70780353|ref|NP_065208.2|; gi|215598574|ref|NP_001135918.1|; gi|70780355|ref|NP_065210.2|; gi|70780357|ref|NP_000028.3|; gi|70780359|ref|NP_065209.2|	5	ankyrin 1 isoform 4 [Homo sapiens]; ankyrin 1 isoform 9 [Homo sapiens]; ankyrin 1 isoform 2 [Homo sapiens]; ankyrin 1 isoform 3 [Homo sapiens]; ankyrin 1 isoform 1 [Homo sapiens]	230942; 238816; 215823; 234778; 234409	230942	1	17	RTPTPLALR	T2: Phospho; T4: Phospho	T1378: Phospho; T1380: Phospho	496.925	3	1487.76	-0.004235	17.03	1	1377	1385	R	Y	1	2012-08-10-Look-iTRAQ-pST-9-230.3959.3959.3.dta - 496.92500|213|213|213|489|213|213|737|1025	1468	['ANK1']	T1378: Phospho; T1380: Phospho				0.0075188	HCD	No	N/A	N/A	N/A	N/A	1	17.03	213	213	213	489	213	213	737	1025	213	213	213
KSPSSPSVENSI|S4: Phospho	67	gi|40354212|ref|NP_056368.1|; gi|194733747|ref|NP_001124171.1|; gi|194733753|ref|NP_001124172.1|	3	phosphoinositide-binding protein PIP3-E isoform 2 [Homo sapiens]; phosphoinositide-binding protein PIP3-E isoform 1 [Homo sapiens]; phosphoinositide-binding protein PIP3-E isoform 1 [Homo sapiens]	62385; 62513; 62513	62385	1	40	KSPSSPSVENSI	S4: Phospho	S429: Phospho	640.668	3	1918.99	-0.004589	39.76	1	426	437	K	-	1	2012-08-10-Look-iTRAQ-pST-11-230.3571.3571.3.dta - 640.66830|211|1093|1537|688|665|556|1191|1564	2185	['IPCEF1']	S429: Phospho	FALSE	['NA']	FALSE	0	HCD	Yes	Yes	S7: Phospho	32.48	7.28	1	39.76	211	1093	1537	688	665	556	1191	1564	211	1093	1537
SLSDPIPQR|S3: Phospho	227	gi|21361458|ref|NP_055601.2|	1	Rho guanine nucleotide exchange factor (GEF) 17 [Homo sapiens]	244635	244635	1	15	SLSDPIPQR	S3: Phospho	S735: Phospho	698.858	2	1395.71	-0.005585	15.58	1	733	741	R	H	0	2012-08-10-Look-iTRAQ-pST-11-230.3807.3807.2.dta - 698.85830|1844|2036|3901|3162|2694|2469|6271|3354	1058	['ARHGEF17']	S735: Phospho	FALSE	['NA']	FALSE	0.00995025	HCD	No	N/A	N/A	N/A	N/A	1	15.58	1844	2036	3901	3162	2694	2469	6271	3354	1844	2036	3901
TETLNSFISVLETVIGTIEEIK|T1: Phospho; T3: Phospho; S6: Phospho; S9: Phospho; T13: Phospho; T17: Phospho	52	gi|166197671|ref|NP_006585.2|	1	adaptor-related protein complex 4, beta 1 subunit [Homo sapiens]	95830	95830	1	9	TETLNSFISVLETVIGTIEEIK	T1: Phospho; T3: Phospho; S6: Phospho; S9: Phospho; T13: Phospho; T17: Phospho	T717: Phospho; T719: Phospho; S722: Phospho; S725: Phospho; T729: Phospho; T733: Phospho	881.877	4	3523.51	-0.03496	8.53	1	717	738	R	S	0	2012-08-10-Look-iTRAQ-pST-20-700.4212.4212.4.dta - 881.87850|214|214|407|688|516|214|434|562	911	['AP4B1']	T717: Phospho; T719: Phospho; S722: Phospho; S725: Phospho; T729: Phospho; T733: Phospho	FALSE	['NA']	FALSE	0	HCD	No	N/A	N/A	N/A	N/A	1	8.53	214	214	407	688	516	214	434	562	214	214	407
TSPVSLWSR|T1: Phospho	77	gi|67782319|ref|NP_000338.3|	1	spectrin beta isoform b [Homo sapiens]	287935	287935	8	42	TSPVSLWSR	T1: Phospho	T2113: Phospho	708.861	2	1415.71	-0.005122	35.52	1	2113	2121	R	L	0	2012-08-10-Look-iTRAQ-pST-15-70.4620.4620.2.dta - 708.86050|1237|210|605|4133|271|1487|29607|4859	1063	['SPTB']	T2113: Phospho	FALSE	['NA']	FALSE	0	HCD	No	N/A	N/A	N/A	N/A	2	35.52	1750	423	818	7112	484	2836	52210	7504	1237	210	605
AASPPASASDLIEQQQK|S3: Phospho	82	gi|56790935|ref|NP_149079.2|	1	hypothetical protein LOC85369 [Homo sapiens]	112683	112683	2	28	AASPPASASDLIEQQQK	S3: Phospho	S335: Phospho	810.42	3	2428.25	-0.0069	16.58	1	333	349	R	R	0	2012-08-10-Look-iTRAQ-pST-13-230.3698.3698.3.dta - 810.42120|1223|731|485|5813|723|1091|16675|10420	2012	['FAM40A']	S335: Phospho	FALSE	['NA']	FALSE	0.00829876	CID	No	N/A	N/A	N/A	N/A	2	40.17	1437	1135	699	6027	937	1442	16889	10634	1223	731	485
YSPSQNSPIHHIPSR|S2: Phospho	5	gi|7661958|ref|NP_055554.1|; gi|117938251|ref|NP_001070908.1|; gi|117938254|ref|NP_001070909.1|; gi|169218320|ref|XP_001732863.1|; gi|239756568|ref|XP_001732939.2|	5	BCL2-associated transcription factor 1 isoform 1 [Homo sapiens]; BCL2-associated transcription factor 1 isoform 2 [Homo sapiens]; BCL2-associated transcription factor 1 isoform 3 [Homo sapiens]; PREDICTED: similar to BCL2-associated transcription factor 1 isoform 2 [Homo sapiens]; PREDICTED: similar to BCL2-associated transcription factor 1 [Homo sapiens]	134464; 127056; 106686; 127021; 127097	134464	5	116	YSPSQNSPIHHIPSR	S2: Phospho	S285: Phospho	526.761	4	2103.02	-0.004867	24.38	1	284	298	R	R	0	2012-08-10-Look-iTRAQ-pST-15-70.2675.2675.4.dta - 526.76180|514|207|1299|884|841|984|1065|1183	1937	['BCLAF1', 'unresolved: gi|169218320|ref|XP_001732863.1|', 'unresolved: gi|239756568|ref|XP_001732939.2|']	S285: Phospho	FALSE	['NA']	FALSE	0.00373134	HCD	No	N/A	N/A	N/A	N/A	1	24.38	514	207	1299	884	841	984	1065	1183	514	207	1299
LSGINEIPRPFSPPVTSNTSPPPAAPLAR|T19: Phospho; S20: Phospho	31	gi|226371723|ref|NP_620137.2|; gi|226371725|ref|NP_001139504.1|	2	FCH domain only 2 isoform a [Homo sapiens]; FCH domain only 2 isoform b [Homo sapiens]	110372; 105684	110372	1	40	LSGINEIPRPFSPPVTSNTSPPPAAPLAR	T19: Phospho; S20: Phospho	T495: Phospho; S496: Phospho	862.692	4	3446.73	0.010214	39.56	1	477	505	K	A	0	2012-08-10-Look-iTRAQ-pST-20-230.3748.3748.4.dta - 862.69380|213|510|707|542|213|432|550|496	1059	['FCHO2']	T495: Phospho; S496: Phospho	FALSE	['NA']	FALSE	0	HCD	Yes	Yes	S12: Phospho; S20: Phospho	27.68	11.88	1	39.56	213	510	707	542	213	432	550	496	213	510	707
SISNPPGSNLR|S3: Phospho	23	gi|148612809|ref|NP_061852.2|	1	WNK lysine deficient protein kinase 1 [Homo sapiens]	285246	285246	2	66	SISNPPGSNLR	S3: Phospho	S2372: Phospho	509.259	3	1524.76	-0.005099	17.62	1	2370	2380	K	T	0	2012-08-10-Look-iTRAQ-pST-13-230.2753.2753.3.dta - 509.25960|207|207|564|557|595|346|452|540	996	['unresolved: gi|148612809|ref|NP_061852.2|']	S2372: Phospho	TRUE	['sp|Q9H4A3|WNK1_HUMAN Serine/threonine-protein kinase WNK1 OS=Homo sapiens GN=WNK1 PE=1 SV=2']	TRUE	0	HCD	No	N/A	N/A	N/A	N/A	1	17.62	207	207	564	557	595	346	452	540	207	207	564
SPSPAPAPAPAAAAGPPTR|S1: Phospho	77	gi|226509740|ref|NP_067051.2|	1	SR-related CTD-associated factor 1 [Homo sapiens]	165367	165367	1	26	SPSPAPAPAPAAAAGPPTR	S1: Phospho	S498: Phospho	690.021	3	2067.05	-0.003058	26.36	1	498	516	R	K	0	2012-08-10-Look-iTRAQ-pST-11-230.2733.2733.3.dta - 690.02200|206|206|744|260|385|206|388|437	2413	['SCAF1']	S498: Phospho	FALSE	['NA']	FALSE	0.00869565	CID	Yes	Yes	Yes	19.66	6.7	1	26.36	206	206	744	260	385	206	388	437	206	206	744
KQTSVDSGIVQ|S4: Phospho	142	gi|4503355|ref|NP_001371.1|	1	dedicator of cytokinesis 1 [Homo sapiens]	262448	262448	1	26	KQTSVDSGIVQ	S4: Phospho	S1858: Phospho	617.336	3	1848.98	0.004588	26.01	1	1855	1865	R	-	1	2012-08-10-Look-iTRAQ-pST-11-230.3046.3046.3.dta - 617.33620|819|931|1532|2513|1639|807|2295|1232	2047	['DOCK1']	S1858: Phospho	FALSE	['NA']	FALSE	0.00429185	HCD	No	N/A	N/A	N/A	N/A	1	26.01	819	931	1532	2513	1639	807	2295	1232	819	931	1532
VAAAAGSGPSPPGSPGHDRER|S10: Phospho; S14: Phospho	40	gi|13559514|ref|NP_060895.1|	1	phosphatidylinositol 4-kinase type 2 alpha [Homo sapiens]	63210	63210	2	56	VAAAAGSGPSPPGSPGHDRER	S10: Phospho; S14: Phospho	S47: Phospho; S51: Phospho	813.035	3	2436.09	-0.006944	11.66	1	38	58	R	Q	1	2012-08-10-Look-iTRAQ-pST-9-700.2469.2469.3.dta - 813.03500|201|201|541|552|935|323|747|826	1844	['PI4K2A']	S47: Phospho; S51: Phospho	FALSE	['NA']	FALSE	0	HCD	No	N/A	N/A	N/A	N/A	1	11.66	201	201	541	552	935	323	747	826	201	201	541
SEPVSPPRDR|S5: Phospho	290	gi|19923215|ref|NP_002388.2|; gi|196114945|ref|NP_001124477.1|	2	myocyte enhancer factor 2C isoform 1 [Homo sapiens]; myocyte enhancer factor 2C isoform 2 [Homo sapiens]	57615; 57797	57615	1	10	SEPVSPPRDR	S5: Phospho	S396: Phospho	508.589	3	1522.74	0.001321	9.89	1	392	401	K	T	1	2012-08-10-Look-iTRAQ-pST-0-700.2170.2170.3.dta - 508.58930|1108|710|2940|2407|377|370|792|824	1354	['MEF2C']	S396: Phospho				0.00653595	HCD	No	N/A	N/A	N/A	N/A	1	9.89	1108	710	2940	2407	377	370	792	824	1108	710	2940
VMALYDFQARSPR|M2: Oxidation; S11: Phospho	83	gi|115298659|ref|NP_003117.2|	1	spectrin, alpha, erythrocytic 1 [Homo sapiens]	337317	337317	4	15	VMALYDFQARSPR	M2: Oxidation; S11: Phospho	M983: Oxidation; S992: Phospho	651.989	3	1952.95	-0.002116	15.6	1	982	994	R	E	1	2012-08-10-Look-iTRAQ-pST-20-70.3219.3219.3.dta - 651.99060|948|210|505|1904|280|918|3869|2769	962	['SPTA1']	S992: Phospho	FALSE	['NA']	FALSE	0	HCD	No	N/A	N/A	N/A	N/A	3	15.6	2202	1601	1501	5012	1458	2763	9043	6761	948	210	505
NSPGLLVSPGNLNK|S2: Phospho	60	gi|19923215|ref|NP_002388.2|; gi|196114945|ref|NP_001124477.1|	2	myocyte enhancer factor 2C isoform 1 [Homo sapiens]; myocyte enhancer factor 2C isoform 2 [Homo sapiens]	57615; 57797	57615	1	46	NSPGLLVSPGNLNK	S2: Phospho	S222: Phospho	700.054	3	2097.14	-0.004643	45.58	1	221	234	R	N	0	2012-08-10-Look-iTRAQ-pST-15-230.3385.3385.3.dta - 700.05340|209|288|1493|1073|381|310|494|209	1518	['MEF2C']	S222: Phospho	FALSE	['NA']	FALSE	0	HCD	Yes	Yes	Yes	31.22	14.36	1	45.58	209	288	1493	1073	381	310	494	209	209	288	1493
FFESFGDLSTPDAVMGNPK|S4: Phospho; M15: Oxidation	23	gi|4504349|ref|NP_000509.1|	1	beta globin [Homo sapiens]	19753	19753	6	36	FFESFGDLSTPDAVMGNPK	S4: Phospho; M15: Oxidation	S45: Phospho; M56: Oxidation	921.777	3	2762.31	-0.004062	36.05	1	42	60	R	V	0	2012-08-10-Look-iTRAQ-pST-20-700.4199.4199.3.dta - 921.77800|209|465|391|772|432|290|8028|2856	656	['HBB']	S45: Phospho	FALSE	['NA']	FALSE	0	HCD	Yes	Yes	Yes	20.37	15.68	7	36.05	2328	1942	2084	4301	2848	2903	21164	8430	209	465	391
LTEPQHGLGSQR|S10: Phospho	98	gi|21070997|ref|NP_003147.2|	1	stromal interaction molecule 1 precursor [Homo sapiens]	93479	93479	1	34	LTEPQHGLGSQR	S10: Phospho	S512: Phospho	569.62	3	1705.85	-0.008053	33.51	1	503	514	R	D	0	2012-08-10-Look-iTRAQ-pST-11-230.2859.2859.3.dta - 569.62020|207|466|504|709|733|452|687|1389	1808	['STIM1']	S512: Phospho	FALSE	['NA']	FALSE	0	HCD	No	N/A	N/A	N/A	N/A	1	33.51	207	466	504	709	733	452	687	1389	207	466	504
AATPTLTTFPTIR|T5: Phospho	64	gi|57242766|ref|NP_787080.2|	1	hypothetical protein LOC168455 [Homo sapiens]	29211	29211	1	49	AATPTLTTFPTIR	T5: Phospho	T187: Phospho	591.986	3	1772.94	-0.001337	48.53	1	183	195	R	V	0	2012-08-10-Look-iTRAQ-pST-17p5-70.4252.4252.3.dta - 591.98610|1190|433|1178|1260|656|1013|1177|4450	1194	['FLJ36031']	T187: Phospho	FALSE	['NA']	FALSE	0	HCD	Yes	Yes	Yes	22.94	25.59	1	48.53	1190	433	1178	1260	656	1013	1177	4450	1190	433	1178
SLVGSWLK|S5: Phospho	85	gi|57863293|ref|NP_056079.1|; gi|57863295|ref|NP_001009880.1|	2	hypothetical protein LOC23313 isoform a [Homo sapiens]; hypothetical protein LOC23313 isoform b [Homo sapiens]	54767; 54377	54767	1	30	SLVGSWLK	S5: Phospho	S367: Phospho	526.633	3	1576.88	-0.0074	29.85	1	363	370	R	L	0	2012-08-10-Look-iTRAQ-pST-17p5-230.3776.3776.3.dta - 526.63290|1544|3669|4350|2754|1829|2303|4090|3834	467	['C22orf9']	S367: Phospho	FALSE	['NA']	FALSE	0	HCD	No	N/A	N/A	N/A	N/A	2	29.85	1753	3878	4829	2963	2132	2512	4299	4043	1544	3669	4350
VKPETPPRQSHSGSISPYPK|S12: Phospho	1	gi|118572613|ref|NP_057417.3|	1	splicing coactivator subunit SRm300 [Homo sapiens]	340030	340030	9	141	VKPETPPRQSHSGSISPYPK	S12: Phospho	S990: Phospho	637.751	5	3183.72	-0.002643	17.05	1	979	998	K	V	1	2012-08-10-Look-iTRAQ-pST-15-230.2384.2384.5.dta - 637.75120|206|206|418|778|206|206|206|298	1925	['SRRM2']	S990: Phospho	FALSE	['NA']	FALSE	0.00970874	CID	No	N/A	N/A	N/A	N/A	1	17.05	206	206	418	778	206	206	206	298	206	206	418
FVSSFSR|S6: Phospho	216	gi|55749621|ref|NP_056364.1|	1	pleckstrin homology domain containing, family G, member 3 [Homo sapiens]	147219	147219	1	16	FVSSFSR	S6: Phospho	S558: Phospho	607.295	2	1212.58	-0.008658	15.55	1	553	559	R	R	0	2012-08-10-Look-iTRAQ-pST-15-70.4039.4039.2.dta - 607.29550|4083|6569|12840|4716|4990|8572|27793|10895	658	['PLEKHG3']	S558: Phospho	FALSE	['NA']	FALSE	0.00249377	HCD	No	N/A	N/A	N/A	N/A	1	15.55	4083	6569	12840	4716	4990	8572	27793	10895	4083	6569	12840
TPFHTSLHQGTSK|T5: Phospho	158	gi|166706875|ref|NP_001969.2|; gi|166706877|ref|NP_001107607.1|; gi|166706879|ref|NP_001107608.1|; gi|166706881|ref|NP_001107609.1|; gi|166706883|ref|NP_001107610.1|; gi|166706885|ref|NP_001107611.1|	6	erythrocyte membrane protein band 4.9 isoform 1 [Homo sapiens]; erythrocyte membrane protein band 4.9 isoform 2 [Homo sapiens]; erythrocyte membrane protein band 4.9 isoform 2 [Homo sapiens]; erythrocyte membrane protein band 4.9 isoform 3 [Homo sapiens]	54726; 51940; 51940; 49534	54726	1	20	TPFHTSLHQGTSK	T5: Phospho	T278: Phospho	533.029	4	2128.09	-0.005173	20.02	1	274	286	R	S	0	2012-08-10-Look-iTRAQ-pST-15-230.2369.2369.4.dta - 533.02940|702|476|546|2623|858|1062|3760|1583	1532	['EPB49']	T278: Phospho	FALSE	['NA']	FALSE	0	HCD	No	N/A	N/A	N/A	N/A	1	20.02	702	476	546	2623	858	1062	3760	1583	702	476	546
LGYISVTDVLK|S5: Phospho	14	gi|70780353|ref|NP_065208.2|; gi|215598574|ref|NP_001135918.1|; gi|70780355|ref|NP_065210.2|; gi|70780357|ref|NP_000028.3|; gi|70780359|ref|NP_065209.2|	5	ankyrin 1 isoform 4 [Homo sapiens]; ankyrin 1 isoform 9 [Homo sapiens]; ankyrin 1 isoform 2 [Homo sapiens]; ankyrin 1 isoform 3 [Homo sapiens]; ankyrin 1 isoform 1 [Homo sapiens]	230942; 238816; 215823; 234778; 234409	230942	3	75	LGYISVTDVLK	S5: Phospho	S781: Phospho	632.692	3	1895.06	-0.008112	44.95	1	777	787	R	V	0	2012-08-10-Look-iTRAQ-pST-17p5-230.4337.4337.3.dta - 632.69260|5479|318|215|15321|1935|717|113405|15570	777	['ANK1']	S781: Phospho	FALSE	['NA']	FALSE	0	HCD	No	N/A	N/A	N/A	N/A	4	44.95	8478	1633	1619	21017	4260	2008	156992	22291	5479	318	215
TIVMGASFR|S7: Phospho	99	gi|5803187|ref|NP_006746.1|	1	transaldolase 1 [Homo sapiens]	47118	47118	3	35	TIVMGASFR	S7: Phospho	S237: Phospho	683.347	2	1364.68	-0.004066	34.74	1	231	239	K	N	0	2012-08-10-Look-iTRAQ-pST-15-70.4309.4309.2.dta - 683.34670|1915|2949|7887|3667|3891|5340|3978|5466	993	['TALDO1']	S237: Phospho	FALSE	['NA']	FALSE	0	HCD	No	N/A	N/A	N/A	N/A	2	34.74	2848	4030	10524	5236	5042	6960	5379	7242	1915	2949	7887
DVDDGSGSPHSPHQLSSK|S8: Phospho	57	gi|148612809|ref|NP_061852.2|	1	WNK lysine deficient protein kinase 1 [Homo sapiens]	285246	285246	1	32	DVDDGSGSPHSPHQLSSK	S8: Phospho	S2029: Phospho	635.306	4	2537.2	-0.005321	31.59	1	2022	2039	R	S	0	2012-08-10-Look-iTRAQ-pST-13-700.2103.2103.4.dta - 635.30630|211|749|860|1145|726|1119|843|1376	1258	['unresolved: gi|148612809|ref|NP_061852.2|']	S2029: Phospho	TRUE	['sp|Q9H4A3|WNK1_HUMAN Serine/threonine-protein kinase WNK1 OS=Homo sapiens GN=WNK1 PE=1 SV=2']	TRUE	0	HCD	Yes	Yes	Yes	19.37	12.22	1	31.59	211	749	860	1145	726	1119	843	1376	211	749	860
STSPPPSPEVWADSR|S3: Phospho	18	gi|166706875|ref|NP_001969.2|; gi|166706877|ref|NP_001107607.1|; gi|166706879|ref|NP_001107608.1|; gi|166706881|ref|NP_001107609.1|; gi|166706883|ref|NP_001107610.1|; gi|166706885|ref|NP_001107611.1|	6	erythrocyte membrane protein band 4.9 isoform 1 [Homo sapiens]; erythrocyte membrane protein band 4.9 isoform 2 [Homo sapiens]; erythrocyte membrane protein band 4.9 isoform 2 [Homo sapiens]; erythrocyte membrane protein band 4.9 isoform 3 [Homo sapiens]	54726; 51940; 51940; 49534	54726	4	46	STSPPPSPEVWADSR	S3: Phospho	S92: Phospho	998.967	2	1995.92	-0.004568	26.32	1	90	104	K	S	0	2012-08-10-Look-iTRAQ-pST-11-700.3380.3380.2.dta - 998.96550|205|205|205|1044|205|492|1924|951	1093	['EPB49']	S92: Phospho	FALSE	['NA']	FALSE	0.00847458	CID	No	N/A	N/A	N/A	N/A	5	53.44	1039	1039	1039	3526	1893	2218	6070	3902	205	205	205
TSPVSLWSR|S2: Phospho	77	gi|67782319|ref|NP_000338.3|	1	spectrin beta isoform b [Homo sapiens]	287935	287935	8	42	TSPVSLWSR	S2: Phospho	S2114: Phospho	708.86	2	1415.71	-0.007102	42.21	1	2113	2121	R	L	0	2012-08-10-Look-iTRAQ-pST-15-70.4701.4701.2.dta - 708.85990|3073|608|1711|8621|1873|5819|47123|8278	1059	['SPTB']	S2114: Phospho	FALSE	['NA']	FALSE	0	HCD	No	N/A	N/A	N/A	N/A	7	42.21	9919	8179	8335	27249	8777	17286	147975	24137	3073	608	1711
EVLYDSEGLSGEER|S10: Phospho	76	gi|226509740|ref|NP_067051.2|	1	SR-related CTD-associated factor 1 [Homo sapiens]	165367	165367	2	40	EVLYDSEGLSGEER	S10: Phospho	S738: Phospho	656.303	3	1965.89	-0.001765	40.78	1	729	742	R	G	0	2012-08-10-Look-iTRAQ-pST-9-700.3841.3841.3.dta - 656.30140|212|212|934|297|769|212|385|1570	1464	['SCAF1']	S738: Phospho	FALSE	['NA']	FALSE	0	HCD	Yes	Yes	Yes	17.98	22.8	1	40.78	212	212	934	297	769	212	385	1570	212	212	934
SLPSSPERR|S4: Phospho; S5: Phospho	293	gi|5453948|ref|NP_006233.1|	1	protein phosphatase 1, regulatory subunit 3D [Homo sapiens]	35105	35105	1	10	SLPSSPERR	S4: Phospho; S5: Phospho	S77: Phospho; S78: Phospho	498.232	3	1491.68	-0.003959	9.58	1	74	82	R	Q	1	2012-08-10-Look-iTRAQ-pST-0-700.2436.2436.3.dta - 498.23230|207|652|888|625|467|482|404|1107	1250	['PPP1R3D']	S77: Phospho; S78: Phospho				0.00777202	HCD	No	N/A	N/A	N/A	N/A	1	9.58	207	652	888	625	467	482	404	1107	207	652	888
SSSLPAYGR|S3: Phospho	8	gi|166706875|ref|NP_001969.2|; gi|166706877|ref|NP_001107607.1|; gi|166706879|ref|NP_001107608.1|; gi|166706881|ref|NP_001107609.1|; gi|166706883|ref|NP_001107610.1|; gi|166706885|ref|NP_001107611.1|	6	erythrocyte membrane protein band 4.9 isoform 1 [Homo sapiens]; erythrocyte membrane protein band 4.9 isoform 2 [Homo sapiens]; erythrocyte membrane protein band 4.9 isoform 2 [Homo sapiens]; erythrocyte membrane protein band 4.9 isoform 3 [Homo sapiens]	54726; 51940; 51940; 49534	54726	4	79	SSSLPAYGR	S3: Phospho	S289: Phospho	661.322	2	1320.64	-0.007705	36.69	1	287	295	K	T	0	2012-08-10-Look-iTRAQ-pST-11-230.2750.2750.2.dta - 661.32300|1630|1170|1106|3760|1079|4003|18539|8721	978	['EPB49']	S289: Phospho	FALSE	['NA']	FALSE	0	HCD	No	N/A	N/A	N/A	N/A	1	36.69	1630	1170	1106	3760	1079	4003	18539	8721	1630	1170	1106
TISDGTISASK|S3: Phospho	132	gi|41581463|ref|NP_060207.2|; gi|256600192|ref|NP_001157945.1|; gi|68348709|ref|NP_001020119.1|	3	formin binding protein 1-like isoform 2 [Homo sapiens]; formin binding protein 1-like isoform 3 [Homo sapiens]; formin binding protein 1-like isoform 1 [Homo sapiens]	79750; 87513; 80210	79750	1	28	TISDGTISASK	S3: Phospho	S295: Phospho	589.979	3	1766.93	-0.012636	27.89	1	293	303	R	Q	0	2012-08-10-Look-iTRAQ-pST-11-230.3526.3526.3.dta - 589.97940|342|211|618|1126|583|1794|1837|1245	1920	['FNBP1L']	S295: Phospho	FALSE	['NA']	FALSE	0.00478469	HCD	No	N/A	N/A	N/A	N/A	1	27.89	342	211	618	1126	583	1794	1837	1245	342	211	618
STSPPPSPEVWADSR|S3: Phospho; S7: Phospho	88	gi|166706875|ref|NP_001969.2|; gi|166706877|ref|NP_001107607.1|; gi|166706879|ref|NP_001107608.1|; gi|166706881|ref|NP_001107609.1|; gi|166706883|ref|NP_001107610.1|; gi|166706885|ref|NP_001107611.1|	6	erythrocyte membrane protein band 4.9 isoform 1 [Homo sapiens]; erythrocyte membrane protein band 4.9 isoform 2 [Homo sapiens]; erythrocyte membrane protein band 4.9 isoform 2 [Homo sapiens]; erythrocyte membrane protein band 4.9 isoform 3 [Homo sapiens]	54726; 51940; 51940; 49534	54726	3	36	STSPPPSPEVWADSR	S3: Phospho; S7: Phospho	S92: Phospho; S96: Phospho	692.968	3	2075.89	-0.008818	34.94	1	90	104	K	S	0	2012-08-10-Look-iTRAQ-pST-9-230.5062.5062.3.dta - 692.96840|378|607|221|886|582|1359|1479|2710	2647	['EPB49']	S92: Phospho; S96: Phospho				0	HCD	No	N/A	N/A	N/A	N/A	7	50.12	1843	2112	1484	8304	2048	5413	8999	13275	378	607	221
GPSWDPFR|S3: Phospho	165	gi|4504517|ref|NP_001531.1|	1	heat shock protein beta-1 [Homo sapiens]	25259	25259	1	21	GPSWDPFR	S3: Phospho	S15: Phospho	673.315	2	1344.62	-0.000962	20.76	1	13	20	R	D	0	2012-08-10-Look-iTRAQ-pST-17p5-70.4728.4728.2.dta - 673.31620|994|3966|6114|13433|8053|2045|22650|2685	767	['HSPB1']	S15: Phospho	FALSE	['NA']	FALSE	0.0037594	HCD	No	N/A	N/A	N/A	N/A	5	40.6	4350	13656	21945	46107	26992	9385	80642	8308	994	3966	6114
YLLGDAPVSPSSQK|S9: Phospho	83	gi|52627149|ref|NP_061848.2|	1	telomeric repeat binding factor 2, interacting protein [Homo sapiens]	52313	52313	1	39	YLLGDAPVSPSSQK	S9: Phospho	S203: Phospho	717.381	3	2149.13	-0.007001	39.35	1	195	208	K	L	0	2012-08-10-Look-iTRAQ-pST-15-230.3381.3381.3.dta - 717.38050|210|369|1038|782|792|686|501|658	1556	['TERF2IP']	S203: Phospho	FALSE	['NA']	FALSE	0	HCD	Yes	Yes	Yes	25.68	13.67	1	39.35	210	369	1038	782	792	686	501	658	210	369	1038
FFESFGDLSTPDAVMGNPK|S4: Phospho	30	gi|4504349|ref|NP_000509.1|	1	beta globin [Homo sapiens]	19753	19753	7	30	FFESFGDLSTPDAVMGNPK	S4: Phospho	S45: Phospho	916.443	3	2746.32	-0.009613	30.48	1	42	60	R	V	0	2012-08-10-Look-iTRAQ-pST-20-700.4430.4430.3.dta - 916.44450|217|217|217|217|217|217|1580|875	646	['HBB']	S45: Phospho	FALSE	['NA']	FALSE	0	CID	Yes	Yes	Yes	25.13	5.35	1	30.48	217	217	217	217	217	217	1580	875	217	217	217
HLSAEDFSR|S3: Phospho	14	gi|166706875|ref|NP_001969.2|; gi|166706877|ref|NP_001107607.1|; gi|166706879|ref|NP_001107608.1|; gi|166706881|ref|NP_001107609.1|; gi|166706883|ref|NP_001107610.1|; gi|166706885|ref|NP_001107611.1|	6	erythrocyte membrane protein band 4.9 isoform 1 [Homo sapiens]; erythrocyte membrane protein band 4.9 isoform 2 [Homo sapiens]; erythrocyte membrane protein band 4.9 isoform 2 [Homo sapiens]; erythrocyte membrane protein band 4.9 isoform 3 [Homo sapiens]	54726; 51940; 51940; 49534	54726	2	74	HLSAEDFSR	S3: Phospho	S372: Phospho	482.56	3	1444.67	-0.005764	35.6	1	370	378	R	V	0	2012-08-10-Look-iTRAQ-pST-9-700.3045.3045.3.dta - 482.56070|211|211|211|1348|245|2199|5558|3040	598	['EPB49']	S372: Phospho	FALSE	['NA']	FALSE	0	HCD	Yes	Yes	Yes	27.95	7.65	2	35.6	414	414	414	1885	448	3108	8717	4727	211	211	211
DGVSLGAVSSTEEASR|S9: Phospho	36	gi|254910960|ref|NP_001157196.1|	1	hypothetical protein LOC388588 [Homo sapiens]	10436	10436	4	48	DGVSLGAVSSTEEASR	S9: Phospho	S27: Phospho	974.96	2	1947.91	-0.004869	29.35	1	19	34	R	C	0	2012-08-10-Look-iTRAQ-pST-0-700.4133.4133.2.dta - 974.95950|378|213|371|899|213|993|1949|802	2436	['LOC388588']	S27: Phospho				0	CID	No	N/A	N/A	N/A	N/A	2	94.38	585	420	578	1106	420	1200	2156	1155	378	213	371
LQQQHSEQPPLQPSPVMTR|S14: Phospho	127	gi|39753957|ref|NP_056417.2|	1	lamina-associated polypeptide 1B [Homo sapiens]	75505	75505	2	20	LQQQHSEQPPLQPSPVMTR	S14: Phospho	S143: Phospho	862.433	3	2584.28	-0.001135	19.65	1	130	148	R	R	0	2012-08-10-Look-iTRAQ-pST-13-230.3241.3241.3.dta - 862.43370|217|217|540|351|217|217|217|305	2083	['TOR1AIP1']	S143: Phospho	FALSE	['NA']	FALSE	0.00518135	CID	Yes	Yes	Yes	16.15	3.5	1	19.65	217	217	540	351	217	217	217	305	217	217	540
KASGPPVSELITK|S3: Phospho	3	gi|4885375|ref|NP_005310.1|; gi|4885377|ref|NP_005311.1|; gi|4885379|ref|NP_005312.1|	3	histone cluster 1, H1c [Homo sapiens]; histone cluster 1, H1d [Homo sapiens]; histone cluster 1, H1e [Homo sapiens]	39604; 41197; 41017	39604	4	103	KASGPPVSELITK	S3: Phospho	S36: Phospho	773.783	3	2318.34	-0.011468	42.21	1	34	46	R	A	1	2012-08-10-Look-iTRAQ-pST-15-230.3208.3208.3.dta - 773.78210|723|1715|9144|1349|1958|2333|3972|1776	1664	['HIST1H1C', 'HIST1H1D', 'HIST1H1E']	S36: Phospho	FALSE	['NA']	FALSE	0	HCD	No	N/A	N/A	N/A	N/A	1	42.21	723	1715	9144	1349	1958	2333	3972	1776	723	1715	9144
STSPPPSPEVWADSR|T2: Phospho	7	gi|166706875|ref|NP_001969.2|; gi|166706877|ref|NP_001107607.1|; gi|166706879|ref|NP_001107608.1|; gi|166706881|ref|NP_001107609.1|; gi|166706883|ref|NP_001107610.1|; gi|166706885|ref|NP_001107611.1|	6	erythrocyte membrane protein band 4.9 isoform 1 [Homo sapiens]; erythrocyte membrane protein band 4.9 isoform 2 [Homo sapiens]; erythrocyte membrane protein band 4.9 isoform 2 [Homo sapiens]; erythrocyte membrane protein band 4.9 isoform 3 [Homo sapiens]	54726; 51940; 51940; 49534	54726	3	101	STSPPPSPEVWADSR	T2: Phospho	T91: Phospho	666.314	3	1995.92	-0.004644	38.74	1	90	104	K	S	0	2012-08-10-Look-iTRAQ-pST-13-230.3963.3963.3.dta - 666.31310|211|211|211|211|211|211|1028|724	1761	['EPB49']	T91: Phospho	FALSE	['NA']	FALSE	0	HCD	Yes	Yes	Yes	22.5	16.24	1	38.74	211	211	211	211	211	211	1028	724	211	211	211
LNSSGSSEDSFVEIR|S10: Phospho	140	gi|20149572|ref|NP_068815.2|; gi|56549107|ref|NP_001008212.1|; gi|56549109|ref|NP_001008213.1|; gi|56549111|ref|NP_001008214.1|	4	optineurin [Homo sapiens]	83316	83316	1	24	LNSSGSSEDSFVEIR	S10: Phospho	S177: Phospho	670.983	3	2009.92	0.000985	24.23	1	168	182	K	M	0	2012-08-10-Look-iTRAQ-pST-9-700.4195.4195.3.dta - 670.98300|212|212|319|401|418|276|856|358	1520	['OPTN']	S177: Phospho	FALSE	['NA']	FALSE	0	HCD	No	N/A	N/A	N/A	N/A	1	24.23	212	212	319	401	418	276	856	358	212	212	319
TPTPLALR|T1: Phospho	9	gi|70780353|ref|NP_065208.2|; gi|215598574|ref|NP_001135918.1|; gi|70780355|ref|NP_065210.2|; gi|70780357|ref|NP_000028.3|; gi|70780359|ref|NP_065209.2|	5	ankyrin 1 isoform 4 [Homo sapiens]; ankyrin 1 isoform 9 [Homo sapiens]; ankyrin 1 isoform 2 [Homo sapiens]; ankyrin 1 isoform 3 [Homo sapiens]; ankyrin 1 isoform 1 [Homo sapiens]	230942; 238816; 215823; 234778; 234409	230942	2	79	TPTPLALR	T1: Phospho	T1378: Phospho	626.849	2	1251.69	-0.00616	40.4	1	1378	1385	R	Y	0	2012-08-10-Look-iTRAQ-pST-11-230.4044.4044.2.dta - 626.84940|2320|323|900|8833|1088|12242|31406|13866	777	['ANK1']	T1378: Phospho	FALSE	['NA']	FALSE	0	HCD	No	N/A	N/A	N/A	N/A	3	40.4	2740	743	1557	10764	1664	15237	40086	17977	2320	323	900
TNIGWMVSLRYRNK|T1: Phospho; M6: Oxidation	71	gi|33859835|ref|NP_000592.3|; gi|58533170|ref|NP_001010932.1|	2	hepatocyte growth factor isoform 1 preproprotein [Homo sapiens]; hepatocyte growth factor isoform 3 precursor [Homo sapiens]	100019; 99488	100019	1	15	TNIGWMVSLRYRNK	T1: Phospho; M6: Oxidation	T503: Phospho; M508: Oxidation	489.267	5	2441.29	0.010743	17.25	1	503	516	R	H	2	2012-08-10-Look-iTRAQ-pST-22p5-30.3134.3134.5.dta - 489.26630|211|211|211|211|211|211|983|698	1167	['HGF']	T503: Phospho	FALSE	['NA']	FALSE	0	CID	No	N/A	N/A	N/A	N/A	1	17.25	211	211	211	211	211	211	983	698	211	211	211
GPSWDPFRDWYPHSR|S3: Phospho	24	gi|4504517|ref|NP_001531.1|	1	heat shock protein beta-1 [Homo sapiens]	25259	25259	2	26	GPSWDPFRDWYPHSR	S3: Phospho	S15: Phospho	763.015	3	2286.03	-0.007106	21.44	1	13	27	R	L	1	2012-08-10-Look-iTRAQ-pST-25-30.4028.4028.3.dta - 763.01670|435|1724|2824|4960|3605|1242|12018|1247	1017	['HSPB1']	S15: Phospho	FALSE	['NA']	FALSE	0	HCD	No	N/A	N/A	N/A	N/A	10	26.6	2623	5524	8948	15265	11491	5021	33820	4120	435	1724	2824
SASADNLTLPR|S3: Phospho	21	gi|32171247|ref|NP_659449.3|; gi|190341110|ref|NP_859049.2|	2	cyclin Y isoform 1 [Homo sapiens]; cyclin Y isoform 2 [Homo sapiens]	45909; 39346	45909	4	60	SASADNLTLPR	S3: Phospho	S326: Phospho	764.885	2	1527.76	-0.005168	28.99	1	324	334	R	W	0	2012-08-10-Look-iTRAQ-pST-11-230.3911.3911.2.dta - 764.88530|972|1687|2405|1683|1567|1582|2373|1903	1296	['CCNY']	S326: Phospho	FALSE	['NA']	FALSE	0.00502513	HCD	No	N/A	N/A	N/A	N/A	3	60.44	1553	2776	3859	2388	2140	2464	3577	3021	972	1687	2405
DSSVPGSPSSIVAK|S9: Phospho	7	gi|166706875|ref|NP_001969.2|; gi|166706877|ref|NP_001107607.1|; gi|166706879|ref|NP_001107608.1|; gi|166706881|ref|NP_001107609.1|; gi|166706883|ref|NP_001107610.1|	5	erythrocyte membrane protein band 4.9 isoform 1 [Homo sapiens]; erythrocyte membrane protein band 4.9 isoform 2 [Homo sapiens]; erythrocyte membrane protein band 4.9 isoform 2 [Homo sapiens]	54726; 51940; 51940	54726	3	101	DSSVPGSPSSIVAK	S9: Phospho	S28: Phospho	673.691	3	2018.05	-0.002105	18.18	1	20	33	R	M	0	2012-08-10-Look-iTRAQ-pST-13-230.3351.3351.3.dta - 673.69220|575|516|632|1198|462|1300|1335|1376	1794	['EPB49']	S28: Phospho	FALSE	['NA']	FALSE	0	HCD	No	N/A	N/A	N/A	N/A	1	18.18	575	516	632	1198	462	1300	1335	1376	575	516	632
DAVQSLQLSPR|S5: Phospho	62	gi|130502162|ref|NP_075055.1|	1	RAS protein activator like 3 [Homo sapiens]	121867	121867	2	42	DAVQSLQLSPR	S5: Phospho	S984: Phospho	799.413	2	1596.82	-0.006429	29.13	1	980	990	R	T	0	2012-08-10-Look-iTRAQ-pST-13-230.3611.3611.2.dta - 799.41390|719|1242|2530|1416|1165|1453|1493|1224	1102	['RASAL3']	S984: Phospho	FALSE	['NA']	FALSE	0	HCD	Yes	Yes	S9: Phospho	24.34	4.79	1	29.13	719	1242	2530	1416	1165	1453	1493	1224	719	1242	2530
RPMDSLDSRLSPPAGLFTSAR|M3: Oxidation; S11: Phospho	149	gi|21618342|ref|NP_003143.2|	1	signal transducer and activator of transcription 5A [Homo sapiens]	104241	104241	1	12	RPMDSLDSRLSPPAGLFTSAR	M3: Oxidation; S11: Phospho	M772: Oxidation; S780: Phospho	669.338	4	2673.33	-0.00185	12.15	1	770	790	R	G	1	2012-08-10-Look-iTRAQ-pST-20-30.3962.3962.4.dta - 669.33890|219|219|518|459|219|491|219|603	1542	['STAT5A']	S780: Phospho	FALSE	['NA']	FALSE	0.00772201	HCD	No	N/A	N/A	N/A	N/A	1	12.15	219	219	518	459	219	491	219	603	219	219	518
LSTPPPLAEEEGLASR|T3: Phospho	2	gi|70780353|ref|NP_065208.2|; gi|215598574|ref|NP_001135918.1|; gi|70780355|ref|NP_065210.2|; gi|70780357|ref|NP_000028.3|; gi|70780359|ref|NP_065209.2|	5	ankyrin 1 isoform 4 [Homo sapiens]; ankyrin 1 isoform 9 [Homo sapiens]; ankyrin 1 isoform 2 [Homo sapiens]; ankyrin 1 isoform 3 [Homo sapiens]; ankyrin 1 isoform 1 [Homo sapiens]	230942; 238816; 215823; 234778; 234409	230942	2	116	LSTPPPLAEEEGLASR	T3: Phospho	T961: Phospho	684.349	3	2050.03	-0.003655	91.52	1	959	974	K	I	0	2012-08-10-Look-iTRAQ-pST-11-700.4109.4109.3.dta - 684.34850|598|203|301|1652|1036|1315|9000|4105	1149	['ANK1']	T961: Phospho	FALSE	['NA']	FALSE	0	HCD	Yes	Yes	Yes	36.79	54.73	1	91.52	598	203	301	1652	1036	1315	9000	4105	598	203	301
ALPSEDEEGQDDKDFYLR|S4: Phospho	20	gi|23097308|ref|NP_149062.1|; gi|154277116|ref|NP_892006.2|; gi|154277118|ref|NP_056108.2|; gi|154277120|ref|NP_598411.2|	4	spectrin repeat containing, nuclear envelope 1 isoform 2 [Homo sapiens]; spectrin repeat containing, nuclear envelope 1 isoform 1 [Homo sapiens]; spectrin repeat containing, nuclear envelope 1 isoform 4 [Homo sapiens]; spectrin repeat containing, nuclear envelope 1 isoform 3 [Homo sapiens]	1222344; 1229404; 451192; 131659	1222344	1	37	ALPSEDEEGQDDKDFYLR	S4: Phospho	S8234: Phospho	704.585	4	2814.32	-0.009294	37.44	1	8231	8248	R	G	1	2012-08-10-Look-iTRAQ-pST-20-700.3281.3281.4.dta - 704.58690|218|218|459|218|218|218|218|725	671	['SYNE1']	S8234: Phospho	FALSE	['NA']	FALSE	0	HCD	No	N/A	N/A	N/A	N/A	1	37.44	218	218	459	218	218	218	218	725	218	218	459
FSTPPGELDGGISGR|T3: Phospho	74	gi|20336305|ref|NP_075044.2|; gi|20336307|ref|NP_060484.2|	2	B-cell CLL/lymphoma 11A isoform 1 [Homo sapiens]; B-cell CLL/lymphoma 11A isoform 2 [Homo sapiens]	107775; 96698	107775	1	43	FSTPPGELDGGISGR	T3: Phospho	T701: Phospho	625.305	3	1872.89	0.000129	42.56	1	699	713	R	S	0	2012-08-10-Look-iTRAQ-pST-15-70.4322.4322.3.dta - 625.30480|677|846|1547|688|560|884|1023|1295	1700	['BCL11A']	T701: Phospho	FALSE	['NA']	FALSE	0	HCD	Yes	Yes	Yes	18.59	23.97	1	42.56	677	846	1547	688	560	884	1023	1295	677	846	1547
ADVVPQQADPEFPRASPR|S16: Phospho	114	gi|186659512|ref|NP_056262.3|	1	calmodulin regulated spectrin-associated protein 1 [Homo sapiens]	216951	216951	1	32	ADVVPQQADPEFPRASPR	S16: Phospho	S563: Phospho	788.724	3	2363.16	-0.006599	32.24	1	548	565	R	A	1	2012-08-10-Look-iTRAQ-pST-13-230.3802.3802.3.dta - 788.72520|208|865|797|590|593|328|589|866	1997	['CAMSAP1']	S563: Phospho	FALSE	['NA']	FALSE	0	HCD	Yes	Yes	Yes	21.72	10.52	1	32.24	208	865	797	590	593	328	589	866	208	865	797
TVFSPTLPAAR|S4: Phospho	64	gi|27477136|ref|NP_064504.2|; gi|27477138|ref|NP_078901.3|	2	zinc finger antiviral protein isoform 1 [Homo sapiens]; zinc finger antiviral protein isoform 2 [Homo sapiens]	120474; 89679	120474	2	44	TVFSPTLPAAR	S4: Phospho	S378: Phospho	772.41	2	1542.81	-0.005838	26.3	1	375	385	K	S	0	2012-08-10-Look-iTRAQ-pST-15-70.4482.4482.2.dta - 772.41000|756|1299|2396|1205|2128|1513|3196|1697	1255	['ZC3HAV1']	S378: Phospho	FALSE	['NA']	FALSE	0	HCD	Yes	Yes	Yes	19.61	6.69	2	44.06	966	1642	2908	1591	2668	1781	4015	2182	756	1299	2396
VMALYDFQARSPR|S11: Phospho	83	gi|115298659|ref|NP_003117.2|	1	spectrin, alpha, erythrocytic 1 [Homo sapiens]	337317	337317	4	15	VMALYDFQARSPR	S11: Phospho	S992: Phospho	646.657	3	1936.95	-0.004398	14.07	1	982	994	R	E	1	2012-08-10-Look-iTRAQ-pST-20-70.3819.3819.3.dta - 646.65890|1115|223|223|1962|350|636|3842|2448	948	['SPTA1']	S992: Phospho	FALSE	['NA']	FALSE	0	HCD	No	N/A	N/A	N/A	N/A	1	14.07	1115	223	223	1962	350	636	3842	2448	1115	223	223
GQSQTSPDHRSDTSSPEVR|S6: Phospho; S11: Phospho	2	gi|118572613|ref|NP_057417.3|	1	splicing coactivator subunit SRm300 [Homo sapiens]	340030	340030	15	215	GQSQTSPDHRSDTSSPEVR	S6: Phospho; S11: Phospho	S1064: Phospho; S1069: Phospho	634.527	4	2534.07	0.003767	18.32	1	1059	1077	K	Q	1	2012-08-10-Look-iTRAQ-pST-9-700.1554.1554.4.dta - 634.52700|205|378|389|577|205|205|205|482	1891	['SRRM2']	S1064: Phospho; S1069: Phospho	FALSE	['NA']	FALSE	0	HCD	No	N/A	N/A	N/A	N/A	1	18.32	205	378	389	577	205	205	205	482	205	378	389
SSSPGKLLGSGYGGLTGGSSR|S3: Phospho	122	gi|31563537|ref|NP_056097.1|; gi|214010173|ref|NP_001135745.1|; gi|214010175|ref|NP_001135746.1|	3	CLIP-associating protein 1 isoform 1 [Homo sapiens]; CLIP-associating protein 1 isoform 2 [Homo sapiens]; CLIP-associating protein 1 isoform 3 [Homo sapiens]	197751; 191162; 190054	197751	1	31	SSSPGKLLGSGYGGLTGGSSR	S3: Phospho	S688: Phospho	654.092	4	2612.34	-0.001616	32.43	1	686	706	R	G	1	2012-08-10-Look-iTRAQ-pST-17p5-70.3498.3498.4.dta - 654.09270|209|209|724|322|368|441|339|385	1726	['CLASP1']	S688: Phospho	FALSE	['NA']	FALSE	0	HCD	No	N/A	N/A	N/A	N/A	1	32.43	209	209	724	322	368	441	339	385	209	209	724
QVAEQGGDLSPAANR|S10: Phospho	13	gi|126362971|ref|NP_005981.3|	1	serine/threonine kinase 10 [Homo sapiens]	140736	140736	2	60	QVAEQGGDLSPAANR	S10: Phospho	S438: Phospho	948.959	2	1895.9	-0.001307	60.45	1	429	443	K	S	0	2012-08-10-Look-iTRAQ-pST-9-230.3091.3091.2.dta - 948.95920|207|706|829|1059|393|1416|1353|902	2347	['STK10']	S438: Phospho				0	CID	Yes	Yes	Yes	18.39	42.06	4	78.3	841	1745	2226	2313	1117	3359	3070	1930	207	706	829
GNSLPCVLEQK|S3: Phospho	7	gi|166706875|ref|NP_001969.2|; gi|166706877|ref|NP_001107607.1|; gi|166706879|ref|NP_001107608.1|	3	erythrocyte membrane protein band 4.9 isoform 1 [Homo sapiens]	54726	54726	3	101	GNSLPCVLEQK	S3: Phospho	S333: Phospho	645.004	3	1932	-0.008885	44.06	1	331	341	R	I	0	2012-08-10-Look-iTRAQ-pST-13-230.4214.4214.3.dta - 645.00470|2628|1858|986|10443|1414|6714|35876|10189	1683	['EPB49']	S333: Phospho	FALSE	['NA']	FALSE	0	HCD	Yes	Yes	Yes	27.37	16.69	2	44.06	3020	2068	1196	10653	1624	6924	36926	10523	2628	1858	986
SGSDAGEARPPTPASPR|S3: Phospho	14	gi|206725523|ref|NP_006738.3|; gi|206725526|ref|NP_694985.29|	2	signal-induced proliferation-associated protein 1 [Homo sapiens]	120122	120122	4	78	SGSDAGEARPPTPASPR	S3: Phospho	S55: Phospho	509.998	4	2035.96	0.000702	33.01	1	53	69	R	A	0	2012-08-10-Look-iTRAQ-pST-9-230.2582.2582.4.dta - 509.99840|210|210|210|514|210|210|210|602	2596	['SIPA1']	S55: Phospho				0	HCD	No	N/A	N/A	N/A	N/A	1	33.01	210	210	210	514	210	210	210	602	210	210	210
RYSDFEWLR|S3: Phospho	16	gi|4507143|ref|NP_003786.1|	1	sorting nexin 3 isoform a [Homo sapiens]	22154	22154	1	52	RYSDFEWLR	S3: Phospho	S72: Phospho	552.6	3	1654.78	-0.001876	52.35	1	70	78	R	S	1	2012-08-10-Look-iTRAQ-pST-20-230.3453.3453.3.dta - 552.60100|1193|1376|3015|1766|1142|1108|1553|1613	461	['SNX3']	S72: Phospho	FALSE	['NA']	FALSE	0	HCD	No	N/A	N/A	N/A	N/A	5	52.35	3595	5034	10715	5602	4946	4652	4975	5544	1193	1376	3015
TPTPLALR|T1: Phospho; T3: Phospho	121	gi|70780353|ref|NP_065208.2|; gi|215598574|ref|NP_001135918.1|; gi|70780355|ref|NP_065210.2|; gi|70780357|ref|NP_000028.3|; gi|70780359|ref|NP_065209.2|	5	ankyrin 1 isoform 4 [Homo sapiens]; ankyrin 1 isoform 9 [Homo sapiens]; ankyrin 1 isoform 2 [Homo sapiens]; ankyrin 1 isoform 3 [Homo sapiens]; ankyrin 1 isoform 1 [Homo sapiens]	230942; 238816; 215823; 234778; 234409	230942	2	39	TPTPLALR	T1: Phospho; T3: Phospho	T1378: Phospho; T1380: Phospho	666.832	2	1331.66	-0.005344	39.34	1	1378	1385	R	Y	0	2012-08-10-Look-iTRAQ-pST-0-700.3978.3978.2.dta - 666.83250|1451|202|583|5557|542|7242|7183|8311	958	['ANK1']	T1378: Phospho; T1380: Phospho				0	HCD	No	N/A	N/A	N/A	N/A	2	39.34	1660	411	792	6632	751	8944	8696	10412	1451	202	583
LQKQPLTSPGSVSPSR|S13: Phospho	50	gi|166706875|ref|NP_001969.2|; gi|166706877|ref|NP_001107607.1|; gi|166706879|ref|NP_001107608.1|; gi|166706881|ref|NP_001107609.1|; gi|166706883|ref|NP_001107610.1|	5	erythrocyte membrane protein band 4.9 isoform 1 [Homo sapiens]; erythrocyte membrane protein band 4.9 isoform 2 [Homo sapiens]; erythrocyte membrane protein band 4.9 isoform 2 [Homo sapiens]	54726; 51940; 51940	54726	2	38	LQKQPLTSPGSVSPSR	S13: Phospho	S16: Phospho	790.77	3	2369.29	-0.003251	20.79	1	4	19	R	D	1	2012-08-10-Look-iTRAQ-pST-15-70.2889.2889.3.dta - 790.76920|395|207|207|1315|207|1459|1714|2118	2029	['EPB49']	S16: Phospho	FALSE	['NA']	FALSE	0	CID	Yes	Yes	S11: Phospho	18.62	2.17	1	20.79	395	207	207	1315	207	1459	1714	2118	395	207	207
RPTLTTFFGR|T3: Phospho; T5: Phospho	129	gi|4507181|ref|NP_003114.1|; gi|71979937|ref|NP_001025459.1|	2	sialophorin precursor [Homo sapiens]	43948	43948	1	26	RPTLTTFFGR	T3: Phospho; T5: Phospho	T341: Phospho; T343: Phospho	553.935	3	1658.79	-0.004704	25.53	1	339	348	R	R	0	2012-08-10-Look-iTRAQ-pST-15-230.4191.4191.3.dta - 553.93570|1466|1307|2235|1879|683|1967|2163|1535	853	['SPN']	T341: Phospho; T343: Phospho	FALSE	['NA']	FALSE	0	HCD	No	N/A	N/A	N/A	N/A	1	25.53	1466	1307	2235	1879	683	1967	2163	1535	1466	1307	2235
RSTSPIIGSPPVR|T3: Phospho; S4: Phospho	86	gi|189217919|ref|NP_689929.2|	1	protein associated with topoisomerase II homolog 1 [Homo sapiens]	97481	97481	3	36	RSTSPIIGSPPVR	T3: Phospho; S4: Phospho	T178: Phospho; S179: Phospho	610.976	3	1829.91	-0.004251	18.29	1	176	188	R	A	1	2012-08-10-Look-iTRAQ-pST-11-230.3562.3562.3.dta - 610.97660|212|353|302|588|460|396|613|543	2018	['PATL1']	T178: Phospho; S179: Phospho	FALSE	['NA']	FALSE	0.00857143	HCD	No	N/A	N/A	N/A	N/A	1	18.29	212	353	302	588	460	396	613	543	212	353	302
RLSSTSLASGHSVR|S3: Phospho; S4: Phospho	39	gi|19923468|ref|NP_057541.2|; gi|120659782|ref|NP_001073349.1|; gi|120659785|ref|NP_001073350.1|; gi|120659787|ref|NP_001073351.1|	4	protein kinase D2 isoform A [Homo sapiens]; protein kinase D2 isoform B [Homo sapiens]	110445; 92403	110445	3	52	RLSSTSLASGHSVR	S3: Phospho; S4: Phospho	S197: Phospho; S198: Phospho	641.31	3	1920.91	-0.003856	45.95	1	195	208	R	L	1	2012-08-10-Look-iTRAQ-pST-15-230.2246.2246.3.dta - 641.31020|380|207|501|969|412|618|663|1086	1332	['PRKD2']	S197: Phospho; S198: Phospho	TRUE	['sp|Q9BZL6|KPCD2_HUMAN Serine/threonine-protein kinase D2 OS=Homo sapiens GN=PRKD2 PE=1 SV=2']	TRUE	0	HCD	No	N/A	N/A	N/A	N/A	2	45.95	588	662	709	1177	772	826	871	1294	380	207	501
GIITDSFGR|S6: Phospho	64	gi|13899275|ref|NP_113631.1|; gi|71067341|ref|NP_001025006.1|	2	cerebral cavernous malformation 2 isoform 2 [Homo sapiens]; cerebral cavernous malformation 2 isoform 1 [Homo sapiens]	56564; 58282	56564	1	42	GIITDSFGR	S6: Phospho	S384: Phospho	675.34	2	1348.67	-0.003991	41.69	1	379	387	R	H	0	2012-08-10-Look-iTRAQ-pST-13-230.4003.4003.2.dta - 675.33960|5717|11551|11602|9839|6894|10048|13120|11241	747	['CCM2']	S384: Phospho	FALSE	['NA']	FALSE	0	HCD	No	N/A	N/A	N/A	N/A	1	41.69	5717	11551	11602	9839	6894	10048	13120	11241	5717	11551	11602
ATSNVFAMFDQSQIQEFK|S3: Phospho	6	gi|5453740|ref|NP_006462.1|; gi|15809016|ref|NP_291024.1|; gi|222144324|ref|NP_001138416.1|; gi|222144326|ref|NP_001138417.1|; gi|29568111|ref|NP_006088.2|; gi|31563524|ref|NP_852667.1|	6	myosin, light chain 12A, regulatory, non-sarcomeric [Homo sapiens]; myosin regulatory light chain MRCL2 isoform A [Homo sapiens]; myosin regulatory light chain MRCL2 isoform A [Homo sapiens]; myosin regulatory light chain MRCL2 isoform A [Homo sapiens]; myosin regulatory light chain 9 isoform a [Homo sapiens]; myosin regulatory light chain 9 isoform b [Homo sapiens]	24402; 24691; 24691; 24691; 24435; 17811	24402	9	65	ATSNVFAMFDQSQIQEFK	S3: Phospho	S19: Phospho	927.124	3	2778.35	-0.004523	64.51	1	17	34	R	E	0	2012-08-10-Look-iTRAQ-pST-20-230.4540.4540.3.dta - 927.12510|3310|3753|6607|3902|4982|6761|9205|6708	903	['MYL12A', 'MYL12B', 'MYL9']	S19: Phospho	FALSE	['NA']	FALSE	0	HCD	Yes	Yes	Yes	29.42	35.09	2	64.51	3525	3968	7184	4117	5197	7084	9859	6923	3310	3753	6607
SLSSPTVTLSAPLEGAK|T6: Phospho	83	gi|21361472|ref|NP_056092.2|; gi|222352082|ref|NP_001138437.1|; gi|222352084|ref|NP_001138438.1|; gi|222352086|ref|NP_001138439.1|; gi|222352088|ref|NP_001138440.1|; gi|222352090|ref|NP_001138441.1|; gi|222352092|ref|NP_001138442.1|; gi|222352094|ref|NP_001138443.1|; gi|222352183|ref|NP_001138436.1|	9	neural precursor cell expressed, developmentally down-regulated 4-like isoform 3 [Homo sapiens]; neural precursor cell expressed, developmentally down-regulated 4-like isoform 2 [Homo sapiens]; neural precursor cell expressed, developmentally down-regulated 4-like isoform 2 [Homo sapiens]; neural precursor cell expressed, developmentally down-regulated 4-like isoform 1 [Homo sapiens]; neural prec…	125201; 110934; 110934; 127110; 126493; 124584; 109025; 109025; 110934	125201	1	22	SLSSPTVTLSAPLEGAK	T6: Phospho	T431: Phospho	782.761	3	2345.27	-0.010355	22.01	1	426	442	R	D	0	2012-08-10-Look-iTRAQ-pST-17p5-230.3443.3443.3.dta - 782.76150|209|209|642|209|209|209|209|326	1033	['NEDD4L']	T431: Phospho	FALSE	['NA']	FALSE	0	CID	Yes	Yes	S4: Phospho	10	12.01	1	22.01	209	209	642	209	209	209	209	326	209	209	642
IYQYIQSR|Y4: Phospho	139	gi|4758222|ref|NP_004705.1|; gi|18765750|ref|NP_567824.1|; gi|18765752|ref|NP_569120.1|; gi|18765754|ref|NP_569121.1|; gi|18765756|ref|NP_569122.1|; gi|18765758|ref|NP_001387.2|; gi|5921999|ref|NP_006474.1|; gi|5922001|ref|NP_006475.1|	8	dual-specificity tyrosine-(Y)-phosphorylation regulated kinase 1B isoform a [Homo sapiens]; dual-specificity tyrosine-(Y)-phosphorylation regulated kinase 1A isoform 3 [Homo sapiens]; dual-specificity tyrosine-(Y)-phosphorylation regulated kinase 1A isoform 2 [Homo sapiens]; dual-specificity tyrosine-(Y)-phosphorylation regulated kinase 1A isoform 4 [Homo sapiens]; dual-specificity tyrosine-(Y)-p…	78242; 79043; 97489; 74602; 73220; 98516; 73981; 75382	78242	4	29	IYQYIQSR	Y4: Phospho	Y273: Phospho	727.869	2	1453.73	-0.003947	20.41	1	270	277	R	F	0	2012-08-10-Look-iTRAQ-pST-15-70.4031.4031.2.dta - 727.86920|2894|4001|5850|3742|3524|4186|4994|4118	1139	['DYRK1B', 'DYRK1A', 'unresolved: gi|18765754|ref|NP_569121.1|']	Y273: Phospho	TRUE	['sp|Q13627|DYR1A_HUMAN Dual specificity tyrosine-phosphorylation-regulated kinase 1A OS=Homo sapiens GN=DYRK1A PE=1 SV=2', 'sp|Q9Y463|DYR1B_HUMAN Dual specificity tyrosine-phosphorylation-regulated kinase 1B OS=Homo sapiens GN=DYRK1B PE=1 SV=1']	FALSE	0.00308642	HCD	No	N/A	N/A	N/A	N/A	4	48.69	7195	10289	15307	10634	10219	11647	13936	11773	2894	4001	5850
LGSVDSFER|S3: Phospho	141	gi|114688046|ref|NP_055647.2|	1	TBC1 domain family, member 4 [Homo sapiens]	172404	172404	1	24	LGSVDSFER	S3: Phospho	S588: Phospho	697.337	2	1392.66	0.000866	24.21	1	586	594	R	S	0	2012-08-10-Look-iTRAQ-pST-9-700.3907.3907.2.dta - 697.33770|818|1655|11135|9498|6359|3100|5438|1027	553	['TBC1D4']	S588: Phospho	FALSE	['NA']	FALSE	0	HCD	No	N/A	N/A	N/A	N/A	1	24.21	818	1655	11135	9498	6359	3100	5438	1027	818	1655	11135
QERLSPEVAPPAHR|S5: Phospho	183	gi|21314720|ref|NP_078976.2|	1	Smad nuclear interacting protein [Homo sapiens]	54021	54021	1	19	QERLSPEVAPPAHR	S5: Phospho	S35: Phospho	657.676	3	1970	0.000747	18.59	1	31	44	K	R	1	2012-08-10-Look-iTRAQ-pST-9-230.3101.3101.3.dta - 657.67580|207|691|693|724|207|633|479|453	2498	['SNIP1']	S35: Phospho				0.00813008	HCD	No	N/A	N/A	N/A	N/A	1	18.59	207	691	693	724	207	633	479	453	207	691	693
VGIQQGLLSQSTR|S9: Phospho	26	gi|29837655|ref|NP_115687.2|; gi|30089919|ref|NP_835237.1|	2	DNA polymerase delta interacting protein 3 isoform 1 [Homo sapiens]; DNA polymerase delta interacting protein 3 isoform 2 [Homo sapiens]	58153; 54352	58153	2	52	VGIQQGLLSQSTR	S9: Phospho	S42: Phospho	885.974	2	1769.93	-0.000949	28.83	1	34	46	R	T	0	2012-08-10-Look-iTRAQ-pST-15-70.4012.4012.2.dta - 885.97380|213|213|435|1199|213|910|213|839	1577	['POLDIP3']	S42: Phospho	FALSE	['NA']	FALSE	0	CID	No	N/A	N/A	N/A	N/A	1	28.83	213	213	435	1199	213	910	213	839	213	213	435
EFDELNPSAQR|S8: Phospho	123	gi|4502285|ref|NP_001672.1|; gi|209413709|ref|NP_001129237.1|; gi|24638454|ref|NP_733765.1|	3	ATPase, Ca++ transporting, slow twitch 2 isoform 2 [Homo sapiens]; ATPase, Ca++ transporting, slow twitch 2 isoform 3 [Homo sapiens]; ATPase, Ca++ transporting, slow twitch 2 isoform 1 [Homo sapiens]	128138; 130464; 133980	128138	1	38	EFDELNPSAQR	S8: Phospho	S663: Phospho	563.932	3	1688.77	0.001655	37.99	1	656	666	R	D	0	2012-08-10-Look-iTRAQ-pST-0-700.4582.4582.3.dta - 563.93130|327|206|604|588|820|559|957|470	1704	['ATP2A2']	S663: Phospho				0	HCD	Yes	Yes	Yes	15.98	22.01	1	37.99	327	206	604	588	820	559	957	470	327	206	604
RVTIASLPR|T3: Phospho	34	gi|42789729|ref|NP_006143.2|	1	lymphoid-restricted membrane protein [Homo sapiens]	68555	68555	2	63	RVTIASLPR	T3: Phospho	T319: Phospho	466.27	3	1395.79	-0.002371	40.88	1	317	325	R	N	1	2012-08-10-Look-iTRAQ-pST-15-70.3252.3252.3.dta - 466.26950|551|774|342|904|343|209|1067|1027	1034	['LRMP']	T319: Phospho	FALSE	['NA']	FALSE	0	HCD	No	N/A	N/A	N/A	N/A	1	40.88	551	774	342	904	343	209	1067	1027	551	774	342
GTYVPSSPTR|S7: Phospho	220	gi|7661580|ref|NP_056425.1|; gi|54111428|ref|NP_057087.2|	2	WD repeat domain, phosphoinositide interacting 2 isoform a [Homo sapiens]; WD repeat domain, phosphoinositide interacting 2 isoform b [Homo sapiens]	57476; 55308	57476	1	14	GTYVPSSPTR	S7: Phospho	S413: Phospho	724.856	2	1447.7	-0.00436	14.65	1	407	416	K	L	0	2012-08-10-Look-iTRAQ-pST-9-230.2972.2972.2.dta - 724.85610|1488|2083|4307|2352|2083|2313|2839|1783	1388	['WIPI2']	S413: Phospho				0.00867679	HCD	No	N/A	N/A	N/A	N/A	1	14.65	1488	2083	4307	2352	2083	2313	2839	1783	1488	2083	4307
SLGLSLSGGDQEDAGR|S7: Phospho	5	gi|49574508|ref|NP_060037.2|	1	N-Acetylglucosamine kinase [Homo sapiens]	41953	41953	1	87	SLGLSLSGGDQEDAGR	S7: Phospho	S76: Phospho	649.31	3	1944.91	-0.002771	86.7	1	70	85	R	I	0	2012-08-10-Look-iTRAQ-pST-13-700.3187.3187.3.dta - 649.30930|1093|2380|2154|2176|2455|1414|2571|2731	852	['unresolved: gi|49574508|ref|NP_060037.2|']	S76: Phospho	FALSE	['NA']	FALSE	0	HCD	Yes	Yes	Yes	38.96	47.74	1	86.7	1093	2380	2154	2176	2455	1414	2571	2731	1093	2380	2154
MGAPESGLAEYLFDKHTLGDSDNES|S25: Phospho	21	gi|56682959|ref|NP_002023.2|	1	ferritin, heavy polypeptide 1 [Homo sapiens]	25642	25642	1	37	MGAPESGLAEYLFDKHTLGDSDNES	S25: Phospho	S183: Phospho	843.646	4	3370.55	0.000649	37.36	1	159	183	K	-	1	2012-08-10-Look-iTRAQ-pST-20-700.4027.4027.4.dta - 843.64500|932|722|848|1672|859|506|1615|748	822	['FTH1']	S183: Phospho	FALSE	['NA']	FALSE	0	HCD	Yes	Yes	S21: Phospho	37.29	0.07	1	37.36	932	722	848	1672	859	506	1615	748	932	722	848
ALPAAHIPAPPHEGSPR|S15: Phospho	111	gi|55769564|ref|NP_003430.1|	1	zinc finger protein 36 [Homo sapiens]	76424	76424	1	30	ALPAAHIPAPPHEGSPR	S15: Phospho	S208: Phospho	526.278	4	2101.08	0.004939	29.85	1	194	210	R	D	0	2012-08-10-Look-iTRAQ-pST-15-230.2760.2760.4.dta - 526.27770|211|211|211|388|211|211|211|509	1520	['ZKSCAN1']	S208: Phospho	FALSE	['NA']	FALSE	0	HCD	Yes	Yes	Yes	19.69	10.16	1	29.85	211	211	211	388	211	211	211	509	211	211	211
DCLIEDSDDEAGQS|S7: Phospho	38	gi|61676106|ref|NP_001012777.1|	1	cytoplasmic tRNA 2-thiolation protein 2 isoform 1 [Homo sapiens]	63600	63600	1	18	DCLIEDSDDEAGQS	S7: Phospho	S508: Phospho	969.384	2	1936.76	-0.00106	18.45	1	502	515	R	-	0	2012-08-10-Look-iTRAQ-pST-22p5-700.5160.5160.2.dta - 969.38600|213|213|481|360|213|213|213|213	617	['CTU2']	S508: Phospho	FALSE	['NA']	FALSE	0.00970874	CID	Yes	Yes	S14: Phospho	12.14	6.31	2	57.05	213	213	481	360	213	213	213	213	213	213	481
NVDNAEGSDTDY|S8: Phospho	70	gi|126131099|ref|NP_003913.3|	1	hect domain and RCC1-like domain 1 [Homo sapiens]	602978	602978	1	27	NVDNAEGSDTDY	S8: Phospho	S4857: Phospho	842.337	2	1682.66	-0.001397	29.34	1	4850	4861	R	-	0	2012-08-10-Look-iTRAQ-pST-17p5-70.1934.1934.2.dta - 842.33770|365|403|629|201|201|201|477|613	1097	['HERC1']	S4857: Phospho	FALSE	['NA']	FALSE	0	CID	Yes	Yes	Y12: Phospho	26.39	2.95	2	38.72	577	615	988	413	413	413	832	825	365	403	629
EWPVSSFNRPFPNSP|S14: Phospho	71	gi|18087819|ref|NP_542386.1|	1	hypothetical protein LOC91283 [Homo sapiens]	42115	42115	1	18	EWPVSSFNRPFPNSP	S14: Phospho	S274: Phospho	715.676	3	2144	0.002228	18.49	1	261	275	K	-	0	2012-08-10-Look-iTRAQ-pST-20-230.3630.3630.3.dta - 715.67610|215|487|1092|614|510|1076|648|890	703	['C9orf30']	S274: Phospho	FALSE	['NA']	FALSE	0.00917431	CID	Yes	Yes	Yes	10.25	8.24	4	26.07	638	1059	1770	1257	933	1662	1071	1313	215	487	1092
WGSLQR|S3: Phospho	134	gi|115298659|ref|NP_003117.2|	1	spectrin, alpha, erythrocytic 1 [Homo sapiens]	337317	337317	11	25	WGSLQR	S3: Phospho	S1167: Phospho	565.783	2	1129.56	-0.006384	16.52	1	1165	1170	R	L	0	2012-08-10-Look-iTRAQ-pST-13-230.3180.3180.2.dta - 565.78410|1970|590|725|3157|1081|5618|28070|11446	390	['SPTA1']	S1167: Phospho	FALSE	['NA']	FALSE	0	HCD	No	N/A	N/A	N/A	N/A	7	26.18	10275	5397	5055	15416	10331	24436	113113	47698	1970	590	725
AQFSVAGVHTVPGSPQAR|S14: Phospho	15	gi|66529407|ref|NP_072174.3|	1	tensin [Homo sapiens]	206576	206576	3	88	AQFSVAGVHTVPGSPQAR	S14: Phospho	S1177: Phospho	731.712	3	2192.1	0.008192	57.69	1	1164	1181	R	H	0	2012-08-10-Look-iTRAQ-pST-17p5-70.3002.3002.3.dta - 731.71130|1323|991|1427|2590|911|1826|1161|4963	1575	['TNS1']	S1177: Phospho	FALSE	['NA']	FALSE	0	HCD	Yes	Yes	Yes	22.75	34.94	2	57.69	1837	1814	1921	4551	1938	3467	2036	7037	1323	991	1427
STTPPPAEPVSLPQEPPKPR|S1: Phospho	62	gi|45359846|ref|NP_987100.1|	1	Ras-GTPase activating protein SH3 domain-binding protein 2 isoform b [Homo sapiens]	57231	57231	3	33	STTPPPAEPVSLPQEPPKPR	S1: Phospho	S225: Phospho	704.129	4	2812.5	-0.010334	33.01	1	225	244	K	V	0	2012-08-10-Look-iTRAQ-pST-13-230.3646.3646.4.dta - 704.13010|215|215|436|215|215|215|364|215	2197	['G3BP2']	S225: Phospho	FALSE	['NA']	FALSE	0	CID	Yes	Yes	T3: Phospho	14.03	18.98	1	33.01	215	215	436	215	215	215	364	215	215	215	436
STSPPPSPEVWADSR|T2: Phospho; S7: Phospho	14	gi|166706875|ref|NP_001969.2|; gi|166706877|ref|NP_001107607.1|; gi|166706879|ref|NP_001107608.1|; gi|166706881|ref|NP_001107609.1|; gi|166706883|ref|NP_001107610.1|; gi|166706885|ref|NP_001107611.1|	6	erythrocyte membrane protein band 4.9 isoform 1 [Homo sapiens]; erythrocyte membrane protein band 4.9 isoform 2 [Homo sapiens]; erythrocyte membrane protein band 4.9 isoform 2 [Homo sapiens]; erythrocyte membrane protein band 4.9 isoform 3 [Homo sapiens]	54726; 51940; 51940; 49534	54726	2	74	STSPPPSPEVWADSR	T2: Phospho; S7: Phospho	T91: Phospho; S96: Phospho	692.97	3	2075.89	-0.002608	38.54	1	90	104	K	S	0	2012-08-10-Look-iTRAQ-pST-9-700.3678.3678.3.dta - 692.96890|1092|1059|984|1367|1004|1253|1768|2246	1596	['EPB49']	T91: Phospho; S96: Phospho	FALSE	['NA']	FALSE	0	HCD	Yes	Yes	S3: Phospho; S7: Phospho	27.58	10.96	1	38.54	1092	1059	984	1367	1004	1253	1768	2246	1092	1059	984
RDEDMLYSPELAQR|M5: Oxidation; S8: Phospho	95	gi|7706501|ref|NP_057396.1|	1	WW domain binding protein 11 [Homo sapiens]	85468	85468	2	45	RDEDMLYSPELAQR	M5: Oxidation; S8: Phospho	M234: Oxidation; S237: Phospho	708.324	3	2121.97	-0.019768	21.4	1	230	243	R	G	1	2012-08-10-Look-iTRAQ-pST-0-700.4067.4067.3.dta - 708.32430|214|734|514|642|695|214|554|693	2744	['WBP11']	S237: Phospho				0.0021097	HCD	No	N/A	N/A	N/A	N/A	1	21.4	214	734	514	642	695	214	554	693	214	734	514
IYLESEHGSPLTPR|S9: Phospho	18	gi|20336305|ref|NP_075044.2|; gi|20336307|ref|NP_060484.2|; gi|20336313|ref|NP_612569.1|	3	B-cell CLL/lymphoma 11A isoform 1 [Homo sapiens]; B-cell CLL/lymphoma 11A isoform 2 [Homo sapiens]; B-cell CLL/lymphoma 11A isoform 3 [Homo sapiens]	107775; 96698; 32286	107775	1	46	IYLESEHGSPLTPR	S9: Phospho	S205: Phospho	661.669	3	1981.98	0.003888	46.33	1	197	210	R	V	0	2012-08-10-Look-iTRAQ-pST-15-700.2925.2925.3.dta - 661.66940|609|209|849|993|669|570|807|383	536	['BCL11A']	S205: Phospho	FALSE	['NA']	FALSE	0	HCD	No	N/A	N/A	N/A	N/A	1	46.33	609	209	849	993	669	570	807	383	609	209	849
TSSGTSLSAMHSSGSSGK|T5: Phospho; M10: Oxidation	14	gi|5032189|ref|NP_005648.1|; gi|213972634|ref|NP_001135451.1|; gi|213972636|ref|NP_001135452.1|	3	tumor protein p53 binding protein 1 isoform 3 [Homo sapiens]; tumor protein p53 binding protein 1 isoform 2 [Homo sapiens]; tumor protein p53 binding protein 1 isoform 1 [Homo sapiens]	247741; 248155; 248283	247741	2	72	TSSGTSLSAMHSSGSSGK	T5: Phospho; M10: Oxidation	T1319: Phospho; M1324: Oxidation	594.034	4	2372.11	-0.007188	16.26	1	1315	1332	R	G	0	2012-08-10-Look-iTRAQ-pST-15-230.1563.1563.4.dta - 594.03440|207|207|312|207|207|207|207|460	1697	['TP53BP1']	T1319: Phospho	FALSE	['NA']	FALSE	0	HCD	No	N/A	N/A	N/A	N/A	1	16.26	207	207	312	207	207	207	207	460	207	207	312
AVSPPHLDGPPSPR|S12: Phospho	44	gi|4505903|ref|NP_002666.1|; gi|109637788|ref|NP_150247.2|; gi|15451765|ref|NP_150242.1|; gi|15451779|ref|NP_150252.1|; gi|239752618|ref|XP_001717440.2|; gi|67089149|ref|NP_150241.2|; gi|67089157|ref|NP_150243.2|; gi|67089160|ref|NP_150253.2|	8	promyelocytic leukemia protein isoform 6 [Homo sapiens]; promyelocytic leukemia protein isoform 5 [Homo sapiens]; promyelocytic leukemia protein isoform 9 [Homo sapiens]; promyelocytic leukemia protein isoform 10 [Homo sapiens]; PREDICTED: similar to promyelocytic leukemia protein [Homo sapiens]; promyelocytic leukemia protein isoform 1 [Homo sapiens]; promyelocytic leukemia protein isoform 2 [Ho…	78459; 70143; 99010; 72867; 18061; 108573; 75603; 93418	78459	2	52	AVSPPHLDGPPSPR	S12: Phospho	S527: Phospho	604.306	3	1809.91	-0.01305	47.6	1	516	529	K	S	0	2012-08-10-Look-iTRAQ-pST-13-230.3136.3136.3.dta - 604.30630|556|592|1196|662|437|859|656|741	1472	['PML', 'unresolved: gi|239752618|ref|XP_001717440.2|']	S527: Phospho	FALSE	['NA']	FALSE	0	HCD	No	N/A	N/A	N/A	N/A	1	47.6	556	592	1196	662	437	859	656	741	556	592	1196
SQSVPGAWPGASPLSSQPLSGSSR|S3: Phospho	15	gi|66529407|ref|NP_072174.3|	1	tensin [Homo sapiens]	206576	206576	3	88	SQSVPGAWPGASPLSSQPLSGSSR	S3: Phospho	S733: Phospho	908.782	3	2723.32	0.003166	29.82	1	731	754	K	Q	0	2012-08-10-Look-iTRAQ-pST-17p5-70.4262.4262.3.dta - 908.78230|221|221|458|429|300|354|221|346	1768	['TNS1']	S733: Phospho	FALSE	['NA']	FALSE	0	HCD	No	N/A	N/A	N/A	N/A	1	29.82	221	221	458	429	300	354	221	346	221	221	458
SASADNLTLPR|S1: Phospho	21	gi|32171247|ref|NP_659449.3|; gi|190341110|ref|NP_859049.2|	2	cyclin Y isoform 1 [Homo sapiens]; cyclin Y isoform 2 [Homo sapiens]	45909; 39346	45909	4	60	SASADNLTLPR	S1: Phospho	S324: Phospho	764.885	2	1527.76	-0.005368	43.26	1	324	334	R	W	0	2012-08-10-Look-iTRAQ-pST-11-230.4003.4003.2.dta - 764.88520|1341|2105|3066|1917|1921|1319|2403|1616	1295	['CCNY']	S324: Phospho	FALSE	['NA']	FALSE	0	HCD	Yes	Yes	S3: Phospho	39.07	4.19	1	43.26	1341	2105	3066	1917	1921	1319	2403	1616	1341	2105	3066
SSGPTSLFAVTVAPPGAR|T5: Phospho	1	gi|14141161|ref|NP_004492.2|; gi|74136883|ref|NP_114032.2|	2	heterogeneous nuclear ribonucleoprotein U isoform b [Homo sapiens]; heterogeneous nuclear ribonucleoprotein U isoform a [Homo sapiens]	110351; 112868	110351	4	160	SSGPTSLFAVTVAPPGAR	T5: Phospho	T191: Phospho	700.366	3	2098.08	7e-06	55.55	1	187	204	K	Q	0	2012-08-10-Look-iTRAQ-pST-20-30.4204.4204.3.dta - 700.36670|219|219|324|525|219|219|219|219	1361	['HNRNPU']	T191: Phospho	FALSE	['NA']	FALSE	0	HCD	No	N/A	N/A	N/A	N/A	2	55.55	219	219	324	525	219	219	219	219	219	219	324
SISPSALQDLLR|S3: Phospho	44	gi|119943102|ref|NP_001073315.1|; gi|119943104|ref|NP_004371.2|	2	CREB binding protein isoform b [Homo sapiens]; CREB binding protein isoform a [Homo sapiens]	298129; 303625	298129	1	35	SISPSALQDLLR	S3: Phospho	S2025: Phospho	842.452	2	1682.89	-0.0012	34.91	1	2023	2034	R	T	0	2012-08-10-Look-iTRAQ-pST-20-70.4392.4392.2.dta - 842.45620|1286|2540|3887|2844|2701|4675|1793|7143	758	['CREBBP']	S2025: Phospho	FALSE	['NA']	FALSE	0	HCD	No	N/A	N/A	N/A	N/A	2	49.92	1508	2762	4109	3239	3144	5125	2377	8152	1286	2540	3887
ITHSPTVSQVTER|S4: Phospho	57	gi|70780353|ref|NP_065208.2|; gi|215598574|ref|NP_001135918.1|; gi|70780355|ref|NP_065210.2|; gi|70780357|ref|NP_000028.3|; gi|70780359|ref|NP_065209.2|	5	ankyrin 1 isoform 4 [Homo sapiens]; ankyrin 1 isoform 9 [Homo sapiens]; ankyrin 1 isoform 2 [Homo sapiens]; ankyrin 1 isoform 3 [Homo sapiens]; ankyrin 1 isoform 1 [Homo sapiens]	230942; 238816; 215823; 234778; 234409	230942	1	46	ITHSPTVSQVTER	S4: Phospho	S1686: Phospho	613.647	3	1837.92	-0.005502	46.46	1	1683	1695	R	S	0	2012-08-10-Look-iTRAQ-pST-15-230.2215.2215.3.dta - 613.64730|1387|1592|943|1708|1248|2118|4426|3414	1159	['ANK1']	S1686: Phospho	FALSE	['NA']	FALSE	0	HCD	Yes	Yes	Yes	19.23	27.23	5	46.46	2978	2940	2419	3974	2703	6563	11675	8649	1387	1592	943
ATSNVFAMFDQSQIQEFK|S3: Phospho; M8: Oxidation	30	gi|5453740|ref|NP_006462.1|; gi|15809016|ref|NP_291024.1|; gi|222144324|ref|NP_001138416.1|; gi|222144326|ref|NP_001138417.1|; gi|29568111|ref|NP_006088.2|; gi|31563524|ref|NP_852667.1|	6	myosin, light chain 12A, regulatory, non-sarcomeric [Homo sapiens]; myosin regulatory light chain MRCL2 isoform A [Homo sapiens]; myosin regulatory light chain MRCL2 isoform A [Homo sapiens]; myosin regulatory light chain MRCL2 isoform A [Homo sapiens]; myosin regulatory light chain 9 isoform a [Homo sapiens]; myosin regulatory light chain 9 isoform b [Homo sapiens]	24402; 24691; 24691; 24691; 24435; 17811	24402	1	58	ATSNVFAMFDQSQIQEFK	S3: Phospho; M8: Oxidation	S19: Phospho; M24: Oxidation	932.456	3	2794.35	-0.004042	58.05	1	17	34	R	E	0	2012-08-10-Look-iTRAQ-pST-17p5-230.4330.4330.3.dta - 932.45710|3791|5530|8152|3853|6494|7245|14068|9045	1186	['MYL12A', 'MYL12B', 'MYL9']	S19: Phospho	FALSE	['NA']	FALSE	0	HCD	No	N/A	N/A	N/A	N/A	10	58.05	6144	9372	12120	6831	10439	12236	21989	14134	3791	5530	8152
QPLLLSEDEEDTKR|S6: Phospho	142	gi|4503525|ref|NP_003743.1|; gi|153791492|ref|NP_001093131.1|; gi|83700233|ref|NP_001032897.1|	3	eukaryotic translation initiation factor 3, subunit C [Homo sapiens]; eukaryotic translation initiation factor 3, subunit C-like [Homo sapiens]	129386; 129515	129386	1	24	QPLLLSEDEEDTKR	S6: Phospho	S39: Phospho	787.744	3	2360.21	0.001915	24.04	1	34	47	K	V	1	2012-08-10-Look-iTRAQ-pST-9-700.3685.3685.3.dta - 787.74280|202|696|2231|835|290|786|975|202	1804	['EIF3C', 'EIF3CL']	S39: Phospho	FALSE	['NA']	FALSE	0	HCD	No	N/A	N/A	N/A	N/A	3	62.11	614	1665	4131	1439	702	1387	1685	614	202	696	2231
SAPASPTHPGLMSPR|S1: Phospho; S5: Phospho	53	gi|82546824|ref|NP_001032242.1|	1	forkhead box K1 [Homo sapiens]	82255	82255	1	44	SAPASPTHPGLMSPR	S1: Phospho; S5: Phospho	S416: Phospho; S420: Phospho	657.299	3	1968.88	-0.007564	43.69	1	416	430	R	S	0	2012-08-10-Look-iTRAQ-pST-11-230.3387.3387.3.dta - 657.29980|211|837|844|454|211|557|618|421	2259	['FOXK1']	S416: Phospho; S420: Phospho	FALSE	['NA']	FALSE	0	HCD	No	N/A	N/A	N/A	N/A	1	43.69	211	837	844	454	211	557	618	421	211	837	844
SSSSTGSEVGGQSTGSNHK|T5: Phospho; S7: Phospho	101	gi|148491080|ref|NP_055903.2|; gi|241982729|ref|NP_001155973.1|	2	trinucleotide repeat containing 6B isoform 2 [Homo sapiens]; trinucleotide repeat containing 6B isoform 1 [Homo sapiens]	212040; 224247	212040	1	24	SSSSTGSEVGGQSTGSNHK	T5: Phospho; S7: Phospho	T565: Phospho; S567: Phospho	854.713	3	2561.13	-0.009926	23.83	1	561	579	R	A	0	2012-08-10-Look-iTRAQ-pST-11-700.1611.1611.3.dta - 854.71320|366|459|973|720|381|950|659|427	1458	['TNRC6B']	T565: Phospho; S567: Phospho	FALSE	['NA']	FALSE	0	HCD	Yes	Yes	S4: Phospho; T5: Phospho	19.17	4.66	1	23.83	366	459	973	720	381	950	659	427	366	459	973
VLSSTSEEDEPGVVK|T5: Phospho; S6: Phospho	154	gi|170932524|ref|NP_861447.3|; gi|170932526|ref|NP_001116314.1|	2	nuclear receptor coactivator 7 isoform 1 [Homo sapiens]; nuclear receptor coactivator 7 isoform 2 [Homo sapiens]	135318; 133947	135318	2	22	VLSSTSEEDEPGVVK	T5: Phospho; S6: Phospho	T210: Phospho; S211: Phospho	782.042	3	2343.11	-0.005904	13.77	1	206	220	R	F	0	2012-08-10-Look-iTRAQ-pST-9-700.4058.4058.3.dta - 782.04250|203|749|503|506|489|831|1299|842	1791	['NCOA7']	T210: Phospho; S211: Phospho	FALSE	['NA']	FALSE	0	HCD	No	N/A	N/A	N/A	N/A	1	13.77	203	749	503	506	489	831	1299	842	203	749	503
ALSHQEPMVSTQPAPR|S3: Phospho	5	gi|130502162|ref|NP_075055.1|	1	RAS protein activator like 3 [Homo sapiens]	121867	121867	4	85	ALSHQEPMVSTQPAPR	S3: Phospho	S51: Phospho	711.684	3	2132.04	-0.008263	21.13	1	49	64	R	S	0	2012-08-10-Look-iTRAQ-pST-11-230.3425.3425.3.dta - 711.68480|212|212|495|281|212|212|212|212	2466	['RASAL3']	S51: Phospho	FALSE	['NA']	FALSE	0.00668896	HCD	No	N/A	N/A	N/A	N/A	1	21.13	212	212	495	281	212	212	212	212	212	212	495
EYGSPLKAYTPVVVTQWYR|S4: Phospho; T10: Phospho	62	gi|148763345|ref|NP_277071.2|; gi|148763347|ref|NP_076916.2|	2	cell division cycle 2-like 2 isoform 4 [Homo sapiens]; cell division cycle 2-like 2 isoform 1 [Homo sapiens]	110295; 111325	110295	1	21	EYGSPLKAYTPVVVTQWYR	S4: Phospho; T10: Phospho	S564: Phospho; T570: Phospho	757.132	4	3024.5	-0.00401	21.79	1	561	579	R	A	1	2012-08-10-Look-iTRAQ-pST-20-230.3695.3695.4.dta - 757.13310|325|473|816|748|798|970|573|886	990	['CDK11A']	S564: Phospho; T570: Phospho	TRUE	['sp|Q9UQ88|CD11A_HUMAN Cyclin-dependent kinase 11A OS=Homo sapiens GN=CDK11A PE=1 SV=4']	TRUE	0	HCD	No	N/A	N/A	N/A	N/A	2	30.03	325	473	816	748	798	970	573	886	325	473	816
TPPPPTLSPAAITVGR|S8: Phospho	121	gi|148612879|ref|NP_079223.3|	1	polyhomeotic like 3 [Homo sapiens]	116729	116729	2	30	TPPPPTLSPAAITVGR	S8: Phospho	S628: Phospho	653.691	3	1958.05	-0.004082	14.11	1	621	636	R	G	0	2012-08-10-Look-iTRAQ-pST-15-70.4488.4488.3.dta - 653.69070|213|213|757|547|1889|304|781|567	1799	['PHC3']	S628: Phospho	FALSE	['NA']	FALSE	0.00700935	HCD	No	N/A	N/A	N/A	N/A	1	14.11	213	213	757	547	1889	304	781	567	213	213	757
SLPTTVPESPNYR|S1: Phospho	121	gi|39725634|ref|NP_056130.2|; gi|61102725|ref|NP_291029.2|	2	la related protein isoform 1 [Homo sapiens]; la related protein isoform 2 [Homo sapiens]	142345; 150299	142345	3	29	SLPTTVPESPNYR	S1: Phospho	S689: Phospho	615.641	3	1843.9	-0.002342	16.14	1	689	701	R	N	0	2012-08-10-Look-iTRAQ-pST-13-230.3652.3652.3.dta - 615.64130|210|210|295|210|210|210|502|210	1530	['LARP1', 'unresolved: gi|61102725|ref|NP_291029.2|']	S689: Phospho	FALSE	['NA']	FALSE	0	HCD	No	N/A	N/A	N/A	N/A	1	16.14	210	210	295	210	210	210	502	210	210	210	295
NLSNEELTK|S3: Phospho	111	gi|226371723|ref|NP_620137.2|; gi|226371725|ref|NP_001139504.1|	2	FCH domain only 2 isoform a [Homo sapiens]; FCH domain only 2 isoform b [Homo sapiens]	110372; 105684	110372	1	30	NLSNEELTK	S3: Phospho	S403: Phospho	579.306	3	1734.9	-0.006561	30.04	1	401	409	R	S	0	2012-08-10-Look-iTRAQ-pST-9-700.3116.3116.3.dta - 579.30580|207|1338|807|720|345|1658|1272|1462	991	['FCHO2']	S403: Phospho	FALSE	['NA']	FALSE	0	HCD	No	N/A	N/A	N/A	N/A	1	30.04	207	1338	807	720	345	1658	1272	1462	207	1338	807
NMLAFSSPAAGGVCEPLKSPQR|S19: Phospho	18	gi|90652851|ref|NP_054831.2|	1	zinc finger transcription factor TRPS1 [Homo sapiens]	175578	175578	3	47	NMLAFSSPAAGGVCEPLKSPQR	S19: Phospho	S140: Phospho	752.133	4	3004.51	-0.009361	47.37	1	122	143	R	A	1	2012-08-10-Look-iTRAQ-pST-20-70.3141.3141.4.dta - 752.13430|214|214|1056|214|214|214|214|214	1269	['TRPS1']	S140: Phospho	FALSE	['NA']	FALSE	0	HCD	No	N/A	N/A	N/A	N/A	1	47.37	214	214	1056	214	214	214	214	214	214	214	1056
DSSFTEVPRSPK|S10: Phospho	36	gi|150417971|ref|NP_003165.2|; gi|150417973|ref|NP_068506.2|	2	supervillin isoform 1 [Homo sapiens]; supervillin isoform 2 [Homo sapiens]	239983; 295352	239983	3	40	DSSFTEVPRSPK	S10: Phospho	S245: Phospho	510.264	4	2037.04	-0.012801	20.68	1	236	247	R	H	1	2012-08-10-Look-iTRAQ-pST-11-230.3504.3504.4.dta - 510.26430|202|423|339|202|202|202|362|543	2378	['SVIL']	S245: Phospho	FALSE	['NA']	FALSE	0.00543478	CID	No	N/A	N/A	N/A	N/A	1	20.68	202	423	339	202	202	202	362	543	202	423	339
SQTLPIIR|T3: Phospho	93	gi|154146189|ref|NP_055504.2|	1	dedicator of cytokinesis 10 [Homo sapiens]	301714	301714	2	36	SQTLPIIR	T3: Phospho	T1440: Phospho	656.37	2	1310.73	-0.00157	31.94	1	1438	1445	R	G	0	2012-08-10-Look-iTRAQ-pST-13-230.3769.3769.2.dta - 656.37050|2606|12270|13182|10667|5931|8801|13623|3897	703	['DOCK10']	T1440: Phospho	FALSE	['NA']	FALSE	0	HCD	No	N/A	N/A	N/A	N/A	2	36.31	2903	14051	15261	12268	6862	10268	16015	4772	2606	12270	13182
LQWDGSSDLSPSDSGSSK|S10: Phospho	46	gi|149588534|ref|NP_001092303.1|; gi|149588870|ref|NP_064603.1|	2	ataxin 7-like 3 isoform b [Homo sapiens]; ataxin 7-like 3 isoform a [Homo sapiens]	48931; 49879	48931	1	35	LQWDGSSDLSPSDSGSSK	S10: Phospho	S281: Phospho	847.735	3	2540.19	-0.006894	34.66	1	272	289	R	T	0	2012-08-10-Look-iTRAQ-pST-13-700.3318.3318.3.dta - 847.73440|497|324|737|957|566|691|390|706	1260	['ATXN7L3']	S281: Phospho	FALSE	['NA']	FALSE	0	HCD	No	N/A	N/A	N/A	N/A	1	34.66	497	324	737	957	566	691	390	706	497	324	737
TASEPNLK|T1: Phospho	122	gi|7662280|ref|NP_055522.1|; gi|153085395|ref|NP_006028.2|; gi|17158039|ref|NP_478056.1|; gi|17158041|ref|NP_478057.1|; gi|30795202|ref|NP_848510.1|; gi|30795204|ref|NP_848512.1|; gi|62750347|ref|NP_005465.2|; gi|62750349|ref|NP_001015053.1|	8	histone deacetylase 9 isoform 3 [Homo sapiens]; histone deacetylase 4 [Homo sapiens]; histone deacetylase 9 isoform 1 [Homo sapiens]; histone deacetylase 9 isoform 2 [Homo sapiens]; histone deacetylase 9 isoform 4 [Homo sapiens]; histone deacetylase 9 isoform 5 [Homo sapiens]; histone deacetylase 5 isoform 1 [Homo sapiens]; histone deacetylase 5 isoform 3 [Homo sapiens]	78737; 134974; 129195; 113134; 135463; 135832; 138823; 138894	78737	1	29	TASEPNLK	T1: Phospho	T218: Phospho	516.613	3	1546.82	-0.005384	28.52	1	218	225	K	V	0	2012-08-10-Look-iTRAQ-pST-9-230.3240.3240.3.dta - 516.61290|391|712|1514|1099|1046|1706|758|1148	1580	['HDAC9', 'HDAC4', 'unresolved: gi|17158041|ref|NP_478057.1|', 'HDAC5']	T218: Phospho				0	HCD	No	N/A	N/A	N/A	N/A	1	28.52	391	712	1514	1099	1046	1706	758	1148	391	712	1514
MVTGVASALSSR|M1: Oxidation; S7: Phospho	75	gi|6715607|ref|NP_000175.1|	1	G-gamma globin [Homo sapiens]	20128	20128	1	42	MVTGVASALSSR	M1: Oxidation; S7: Phospho	M134: Oxidation; S140: Phospho	789.893	2	1577.78	-0.008251	42.34	1	134	145	K	Y	0	2012-08-10-Look-iTRAQ-pST-15-70.3519.3519.2.dta - 789.89200|945|1465|1177|1119|1265|1468|12580|1583	1305	['HBG2']	S140: Phospho	FALSE	['NA']	FALSE	0	HCD	No	N/A	N/A	N/A	N/A	1	42.34	945	1465	1177	1119	1265	1468	12580	1583	945	1465	1177
WEDGSRDGVSLGAVSSTEEASR|S10: Phospho; S15: Phospho	7	gi|254910960|ref|NP_001157196.1|	1	hypothetical protein LOC388588 [Homo sapiens]	10436	10436	2	118	WEDGSRDGVSLGAVSSTEEASR	S10: Phospho; S15: Phospho	S22: Phospho; S27: Phospho	920.403	3	2758.18	0.00781	23.63	1	13	34	R	C	1	2012-08-10-Look-iTRAQ-pST-0-700.5228.5228.3.dta - 920.40260|855|211|211|211|211|211|1615|2432	3060	['LOC388588']	S22: Phospho; S27: Phospho				0	HCD	No	N/A	N/A	N/A	N/A	1	23.63	855	211	211	211	211	211	1615	2432	855	211	211
ERSPSPPTIQSK|S3: Phospho; S5: Phospho	88	gi|44955926|ref|NP_055430.1|; gi|197333879|ref|NP_001127945.1|	2	genetic suppressor element 1 isoform 1 [Homo sapiens]; genetic suppressor element 1 isoform 2 [Homo sapiens]	155531; 143694	155531	3	27	ERSPSPPTIQSK	S3: Phospho; S5: Phospho	S826: Phospho; S828: Phospho	699.017	3	2094.04	-0.008975	19.11	1	824	835	R	R	1	2012-08-10-Look-iTRAQ-pST-9-700.2596.2596.3.dta - 699.01700|765|731|1438|1615|881|304|488|1008	1616	['KIAA0182']	S826: Phospho; S828: Phospho	FALSE	['NA']	FALSE	0.00555556	CID	No	N/A	N/A	N/A	N/A	2	19.3	968	934	1641	1818	1327	507	691	1211	765	731	1438
DTPRPDHPPHDGHSPASR|S14: Phospho	163	gi|56243590|ref|NP_060853.3|	1	WD repeat domain 33 isoform 1 [Homo sapiens]	162017	162017	1	22	DTPRPDHPPHDGHSPASR	S14: Phospho	S1210: Phospho	472.821	5	2359.08	-0.005852	21.87	1	1197	1214	R	E	0	2012-08-10-Look-iTRAQ-pST-9-230.1473.1473.5.dta - 472.82150|205|205|821|205|205|205|205|205	2758	['WDR33']	S1210: Phospho				0.00321543	HCD	No	N/A	N/A	N/A	N/A	1	21.87	205	205	821	205	205	205	205	205	205	205	821
QTSSFLV|S3: Phospho	85	gi|8393638|ref|NP_058642.1|	1	F11 receptor precursor [Homo sapiens]	38133	38133	2	36	QTSSFLV	S3: Phospho	S295: Phospho	583.292	2	1164.57	-0.004088	35.93	1	293	299	K	-	0	2012-08-10-Look-iTRAQ-pST-11-230.5209.5209.2.dta - 583.29240|1451|2506|1343|3964|1420|1036|7986|1405	554	['F11R']	S295: Phospho	FALSE	['NA']	FALSE	0	HCD	Yes	Yes	S4: Phospho	25.97	9.96	2	35.93	2790	4560	3114	5339	3310	3801	9732	3692	1451	2506	1343
GSTSFLDTRF|S2: Phospho	144	gi|38348348|ref|NP_940919.1|	1	TBC1 domain family, member 10C [Homo sapiens]	54453	54453	2	23	GSTSFLDTRF	S2: Phospho	S438: Phospho	757.861	2	1513.71	-0.005074	22.66	1	437	446	R	-	1	2012-08-10-Look-iTRAQ-pST-15-230.4439.4439.2.dta - 757.86000|8598|12997|12577|12679|7218|17630|27805|11464	667	['TBC1D10C']	S438: Phospho	FALSE	['NA']	FALSE	0	HCD	No	N/A	N/A	N/A	N/A	1	22.66	8598	12997	12577	12679	7218	17630	27805	11464	8598	12997	12577
WDAPDDELDNDNSSAR|S14: Phospho	56	gi|67782319|ref|NP_000338.3|; gi|67782321|ref|NP_001020029.1|	2	spectrin beta isoform b [Homo sapiens]; spectrin beta isoform a [Homo sapiens]	287935; 316086	287935	1	37	WDAPDDELDNDNSSAR	S14: Phospho	S36: Phospho	735.305	3	2202.9	-0.007603	36.72	1	23	38	R	L	0	2012-08-10-Look-iTRAQ-pST-11-700.3635.3635.3.dta - 735.30440|207|207|207|207|294|455|1498|629	1275	['SPTB']	S36: Phospho	FALSE	['NA']	FALSE	0	HCD	Yes	Yes	Yes	20.77	15.95	1	36.72	207	207	207	207	294	455	1498	629	207	207	207
ECDSPSYQKR|S4: Phospho	104	gi|56090473|ref|NP_001007552.1|; gi|124486720|ref|NP_689795.3|; gi|169216446|ref|XP_001716054.1|; gi|239757918|ref|XP_002346378.1|; gi|62899069|ref|NP_001017417.1|; gi|62945406|ref|NP_001017435.1|; gi|62945408|ref|NP_001017436.1|; gi|62945410|ref|NP_001017438.1|	8	cancer/testis antigen family 45, member A5 [Homo sapiens]; cancer/testis antigen CT45 [Homo sapiens]; PREDICTED: similar to integrator complex subunit 6 [Homo sapiens]; PREDICTED: cancer/testis antigen family 45, member A6 [Homo sapiens]; cancer/testis antigen family 45, member A1 [Homo sapiens]; cancer/testis antigen family 45, member A3 [Homo sapiens]; cancer/testis antigen family 45, member A4…	28414; 28818; 25697; 25862; 28788; 28846; 28760; 28760	28414	2	31	ECDSPSYQKR	S4: Phospho	S24: Phospho	653.31	3	1956.92	-0.014615	19.88	1	21	30	R	Q	1	2012-08-10-Look-iTRAQ-pST-9-700.1952.1952.3.dta - 653.31020|208|377|25502|208|434|883|333|553	1444	['CT45A5', 'CT45A2', 'LOC100133581', 'unresolved: gi|239757918|ref|XP_002346378.1|', 'CT45A1', 'CT45A3', 'CT45A4', 'CT45A6']	S24: Phospho	FALSE	['NA']	FALSE	0	HCD	No	N/A	N/A	N/A	N/A	2	32.17	411	919	33741	916	637	1545	536	756	208	377	25502
GNAEGSSDEEGKLVIDEPAKEK|S6: Phospho; S7: Phospho	18	gi|4758516|ref|NP_004485.1|; gi|186928819|ref|NP_001119522.1|; gi|186928821|ref|NP_001119523.1|	3	hepatoma-derived growth factor isoform a [Homo sapiens]; hepatoma-derived growth factor isoform b [Homo sapiens]; hepatoma-derived growth factor isoform c [Homo sapiens]	35404; 36517; 32937	35404	9	38	GNAEGSSDEEGKLVIDEPAKEK	S6: Phospho; S7: Phospho	S132: Phospho; S133: Phospho	736.574	5	3677.85	-0.017453	14.3	1	127	148	K	N	2	2012-08-10-Look-iTRAQ-pST-22p5-700.5145.5145.5.dta - 736.57500|213|481|1628|788|567|556|994|213	1129	['HDGF']	S132: Phospho; S133: Phospho	FALSE	['NA']	FALSE	0	HCD	No	N/A	N/A	N/A	N/A	17	21.24	2976	3811	8830	4917	5476	4020	5579	2976	213	481	1628
LSLTDPLVAER|S2: Phospho	84	gi|4504073|ref|NP_000398.1|	1	glycoprotein Ib, beta polypeptide precursor [Homo sapiens]	22578	22578	2	38	LSLTDPLVAER	S2: Phospho	S191: Phospho	799.429	2	1596.84	-0.000295	37.94	1	190	200	R	A	0	2012-08-10-Look-iTRAQ-pST-15-230.4655.4655.2.dta - 799.42910|6514|21069|14377|56642|1379|10743|8148|5815	760	['GP1BB']	S191: Phospho	FALSE	['NA']	FALSE	0	HCD	No	N/A	N/A	N/A	N/A	2	37.94	6726	21281	14589	57414	1591	10955	8360	6027	6514	21069	14377
RPSDENTIAPSEVQK|T7: Phospho	146	gi|29294627|ref|NP_003613.2|	1	PTPRF interacting protein binding protein 1 isoform 1 [Homo sapiens]	139842	139842	1	17	RPSDENTIAPSEVQK	T7: Phospho	T792: Phospho	590.556	4	2358.2	-0.009811	17.49	1	786	800	R	W	0	2012-08-10-Look-iTRAQ-pST-9-700.2817.2817.4.dta - 590.55610|206|206|725|206|206|206|206|206	1799	['PPFIBP1']	T792: Phospho	FALSE	['NA']	FALSE	0.00990099	CID	No	N/A	N/A	N/A	N/A	1	17.49	206	206	725	206	206	206	206	206	206	206	725
SSSVTSIDKESR|S3: Phospho; S6: Phospho	278	gi|189217897|ref|NP_640337.3|; gi|189217915|ref|NP_001121187.1|	2	syntaxin binding protein 5 (tomosyn) isoform a [Homo sapiens]; syntaxin binding protein 5 (tomosyn) isoform b [Homo sapiens]	144784; 150687	144784	2	11	SSSVTSIDKESR	S3: Phospho; S6: Phospho	S746: Phospho; S749: Phospho	516.75	4	2062.98	-0.008132	11.3	1	744	755	R	E	1	2012-08-10-Look-iTRAQ-pST-0-700.2789.2789.4.dta - 516.75020|212|212|212|212|212|212|212|1059	2676	['STXBP5']	S746: Phospho; S749: Phospho				0.00547945	HCD	No	N/A	N/A	N/A	N/A	1	11.3	212	212	212	212	212	212	212	1059	212	212	212
NFSYVSPELQP|S3: Phospho	98	gi|28557781|ref|NP_006246.2|	1	protein kinase C, eta [Homo sapiens]	91315	91315	1	23	NFSYVSPELQP	S3: Phospho	S675: Phospho	832.896	2	1663.78	-0.002968	25	1	673	683	R	-	0	2012-08-10-Look-iTRAQ-pST-15-70.5277.5277.2.dta - 832.89660|210|210|492|210|210|456|1032|210	1427	['PRKCH']	S675: Phospho	TRUE	['sp|P24723|KPCL_HUMAN Protein kinase C eta type OS=Homo sapiens GN=PRKCH PE=1 SV=4']	TRUE	0	CID	No	N/A	N/A	N/A	N/A	2	25	421	421	703	421	421	739	2133	421	210	210	492
LYGSVCDLR|S4: Phospho	94	gi|22748725|ref|NP_689545.1|; gi|190610018|ref|NP_001122067.1|; gi|190610020|ref|NP_001122068.1|	3	tandem C2 domains, nuclear [Homo sapiens]	66383	66383	1	36	LYGSVCDLR	S4: Phospho	S156: Phospho	733.853	2	1465.69	-0.003457	36.9	1	153	161	R	T	0	2012-08-10-Look-iTRAQ-pST-13-230.4158.4158.2.dta - 733.85310|3880|13568|5972|17496|5430|6163|18151|5149	916	['TC2N']	S156: Phospho	FALSE	['NA']	FALSE	0	HCD	No	N/A	N/A	N/A	N/A	1	36.9	3880	13568	5972	17496	5430	6163	18151	5149	3880	13568	5972
LTYISKVSDATK|Y3: Phospho	206	gi|31377720|ref|NP_067635.2|; gi|50234893|ref|NP_001001974.1|	2	pleckstrin homology domain containing, family A (phosphoinositide binding specific) member 1 [Homo sapiens]	55963	55963	1	11	LTYISKVSDATK	Y3: Phospho	Y63: Phospho	580.336	4	2317.31	0.006667	12.17	1	61	72	K	L	1	2012-08-10-Look-iTRAQ-pST-15-230.3297.3297.4.dta - 580.33510|217|526|1195|217|406|504|861|446	1663	['PLEKHA1']	Y63: Phospho	FALSE	['NA']	FALSE	0.00295858	HCD	No	N/A	N/A	N/A	N/A	1	12.17	217	526	1195	217	406	504	861	446	217	526	1195
ATENDIYNFFSPLNPVR|S11: Phospho	18	gi|4826760|ref|NP_004957.1|; gi|148470397|ref|NP_001091678.1|; gi|148470400|ref|NP_001091677.1|; gi|148470402|ref|NP_001091675.1|; gi|148470404|ref|NP_001091674.1|; gi|148470406|ref|NP_001091676.1|; gi|5031753|ref|NP_005511.1|	7	heterogeneous nuclear ribonucleoprotein F [Homo sapiens]; heterogeneous nuclear ribonucleoprotein H1 [Homo sapiens]	51156; 54655	51156	1	27	ATENDIYNFFSPLNPVR	S11: Phospho	S310: Phospho	794.385	3	2380.14	-0.008129	29.29	1	300	316	K	V	0	2012-08-10-Look-iTRAQ-pST-22p5-230.4505.4505.3.dta - 794.38420|213|213|213|213|213|213|359|343	820	['HNRNPF', 'HNRNPH1']	S310: Phospho	FALSE	['NA']	FALSE	0	CID	No	N/A	N/A	N/A	N/A	1	29.29	213	213	213	213	213	213	359	343	213	213	213
NSSLGSPSNLCGSPPGSIR|S13: Phospho	61	gi|122937239|ref|NP_001073888.1|	1	zinc finger CCCH-type domain containing 5 [Homo sapiens]	112253	112253	1	45	NSSLGSPSNLCGSPPGSIR	S13: Phospho	S461: Phospho	757.699	3	2270.07	0.008757	45.14	1	449	467	R	K	0	2012-08-10-Look-iTRAQ-pST-15-70.3355.3355.3.dta - 757.69540|204|204|678|204|204|204|204|204	2001	['UNK']	S461: Phospho	FALSE	['NA']	FALSE	0	HCD	Yes	Yes	Yes	38.07	7.07	1	45.14	204	204	678	204	204	204	204	204	204	204	678
VFPSVASPQK|S7: Phospho	100	gi|37574618|ref|NP_932095.1|; gi|37574622|ref|NP_060907.2|	2	hemogen [Homo sapiens]	68901	68901	1	36	VFPSVASPQK	S7: Phospho	S123: Phospho	583.323	3	1746.95	-0.004842	35.81	1	117	126	K	V	0	2012-08-10-Look-iTRAQ-pST-17p5-70.3315.3315.3.dta - 583.32340|1899|539|432|5217|805|1389|1026|4882	1161	['HEMGN']	S123: Phospho	FALSE	['NA']	FALSE	0	HCD	No	N/A	N/A	N/A	N/A	2	35.81	2849	751	644	7681	1017	1879	1539	7456	1899	539	432
MLEGRQTPASTLEQDATDYR|M1: Oxidation; T7: Phospho; S10: Phospho; T11: Phospho	65	gi|71043500|ref|NP_775864.3|	1	beta 1,4-N-acetylgalactosaminyltransferase-transferase 3 [Homo sapiens]	128440	128440	1	15	MLEGRQTPASTLEQDATDYR	M1: Oxidation; T7: Phospho; S10: Phospho; T11: Phospho	M452: Oxidation; T458: Phospho; S461: Phospho; T462: Phospho	711.304	4	2841.16	0.02368	16.64	1	452	471	R	L	1	2012-08-10-Look-iTRAQ-pST-17p5-700.2305.2305.4.dta - 711.30490|213|344|431|586|594|595|566|446	725	['B4GALNT3']	T458: Phospho; S461: Phospho; T462: Phospho	FALSE	['NA']	FALSE	0	CID	No	N/A	N/A	N/A	N/A	1	16.64	213	344	431	586	594	595	566	446	213	344	431
HTPPTIGGSLPYR|S9: Phospho	92	gi|109689723|ref|NP_005750.4|	1	abl interactor 2 [Homo sapiens]	57642	57642	1	38	HTPPTIGGSLPYR	S9: Phospho	S301: Phospho	593.974	3	1778.9	-0.001406	38.3	1	293	305	R	R	0	2012-08-10-Look-iTRAQ-pST-15-70.3330.3330.3.dta - 593.97130|378|776|1864|914|818|841|990|410	1587	['ABI2']	S301: Phospho	FALSE	['NA']	FALSE	0	HCD	No	N/A	N/A	N/A	N/A	1	38.3	378	776	1864	914	818	841	990	410	378	776	1864
TSSTLDSEGTFNSYR|T4: Phospho	73	gi|7661998|ref|NP_055559.1|; gi|197304775|ref|NP_001127852.1|; gi|197304777|ref|NP_001127853.1|	3	TBC1 domain family, member 5 isoform b [Homo sapiens]; TBC1 domain family, member 5 isoform a [Homo sapiens]	102904; 105114	102904	2	26	TSSTLDSEGTFNSYR	T4: Phospho	T45: Phospho	683.64	3	2047.9	-0.004984	28.82	1	42	56	R	K	0	2012-08-10-Look-iTRAQ-pST-11-700.3225.3225.3.dta - 683.63980|313|454|586|593|205|613|380|409	1145	['TBC1D5']	T45: Phospho	FALSE	['NA']	FALSE	0	CID	Yes	Yes	S2: Phospho	23.56	5.26	1	28.82	313	454	586	593	205	613	380	409	313	454	586
RQSMAFSILNTPK|S3: Phospho	73	gi|71361682|ref|NP_006176.2|	1	nuclear mitotic apparatus protein 1 [Homo sapiens]	285438	285438	5	36	RQSMAFSILNTPK	S3: Phospho	S2047: Phospho	546.045	4	2180.16	-0.011667	27.11	1	2045	2057	R	K	1	2012-08-10-Look-iTRAQ-pST-20-30.3536.3536.4.dta - 546.04550|1143|740|1551|1527|222|1150|941|596	1408	['NUMA1']	S2047: Phospho	FALSE	['NA']	FALSE	0	HCD	No	N/A	N/A	N/A	N/A	1	27.11	1143	740	1551	1527	222	1150	941	596	1143	740	1551
SSGSETEQVVDFSDR|T6: Phospho	26	gi|5901962|ref|NP_008998.1|	1	MYST histone acetyltransferase 2 [Homo sapiens]	85884	85884	2	53	SSGSETEQVVDFSDR	T6: Phospho	T104: Phospho	676.301	3	2025.88	-0.003032	25.16	1	99	113	R	E	0	2012-08-10-Look-iTRAQ-pST-0-700.4579.4579.3.dta - 676.30040|206|206|654|206|206|206|206|206	2621	['MYST2']	T104: Phospho				0	CID	Yes	Yes	S4: Phospho	15.88	9.28	1	25.16	206	206	654	206	206	206	206	206	206	206	654
INWASFR|S5: Phospho	191	gi|199559779|ref|NP_114429.2|	1	coiled-coil domain containing 8 [Homo sapiens]	66450	66450	1	15	INWASFR	S5: Phospho	S273: Phospho	639.317	2	1276.63	-0.007409	14.69	1	269	275	K	R	0	2012-08-10-Look-iTRAQ-pST-17p5-70.4639.4639.2.dta - 639.31730|2026|2167|4375|2834|5200|2403|8033|2138	654	['CCDC8']	S273: Phospho	FALSE	['NA']	FALSE	0.00294985	HCD	No	N/A	N/A	N/A	N/A	1	14.69	2026	2167	4375	2834	5200	2403	8033	2138	2026	2167	4375
LGYISVTDVLK|T7: Phospho	51	gi|70780353|ref|NP_065208.2|; gi|215598574|ref|NP_001135918.1|; gi|70780355|ref|NP_065210.2|; gi|70780357|ref|NP_000028.3|; gi|70780359|ref|NP_065209.2|	5	ankyrin 1 isoform 4 [Homo sapiens]; ankyrin 1 isoform 9 [Homo sapiens]; ankyrin 1 isoform 2 [Homo sapiens]; ankyrin 1 isoform 3 [Homo sapiens]; ankyrin 1 isoform 1 [Homo sapiens]	230942; 238816; 215823; 234778; 234409	230942	1	18	LGYISVTDVLK	T7: Phospho	T783: Phospho	632.693	3	1895.06	-0.005892	20.37	1	777	787	R	V	0	2012-08-10-Look-iTRAQ-pST-17p5-700.3888.3888.3.dta - 632.69230|211|211|211|211|211|211|1173|211	424	['ANK1']	T783: Phospho	FALSE	['NA']	FALSE	0	CID	Yes	Yes	S5: Phospho	12.37	8	1	20.37	211	211	211	211	211	211	1173	211	211	211	211
SPGSPVGEGTGSPPK|S4: Phospho	49	gi|29826319|ref|NP_001110.2|; gi|29826321|ref|NP_054908.2|; gi|29826323|ref|NP_054909.2|; gi|29826325|ref|NP_789771.1|	4	adducin 1 (alpha) isoform a [Homo sapiens]; adducin 1 (alpha) isoform b [Homo sapiens]; adducin 1 (alpha) isoform c [Homo sapiens]; adducin 1 (alpha) isoform d [Homo sapiens]	97427; 101248; 82566; 86387	97427	1	33	SPGSPVGEGTGSPPK	S4: Phospho	S358: Phospho	681.35	3	2041.03	-0.007389	32.65	1	355	369	R	W	0	2012-08-10-Look-iTRAQ-pST-9-230.3068.3068.3.dta - 681.34980|213|213|213|213|213|213|1181|213	2601	['ADD1']	S358: Phospho				0	CID	Yes	Yes	Yes	26.94	5.71	1	32.65	213	213	213	213	213	213	1181	213	213	213	213
LSPGSYPTVIQQQNATSQR|S2: Phospho	121	gi|27886539|ref|NP_036472.2|; gi|209862843|ref|NP_001129493.1|; gi|27886541|ref|NP_775114.1|	3	nuclear factor of activated T-cells, cytoplasmic, calcineurin-dependent 2 isoform B [Homo sapiens]; nuclear factor of activated T-cells, cytoplasmic, calcineurin-dependent 2 isoform D [Homo sapiens]; nuclear factor of activated T-cells, cytoplasmic, calcineurin-dependent 2 isoform C [Homo sapiens]	110977; 108944; 111643	110977	1	18	LSPGSYPTVIQQQNATSQR	S2: Phospho	S856: Phospho	820.415	3	2458.22	0.006929	20.04	1	855	873	R	A	0	2012-08-10-Look-iTRAQ-pST-17p5-70.3513.3513.3.dta - 820.41470|403|208|208|669|208|208|697|208	1666	['NFATC2']	S856: Phospho	FALSE	['NA']	FALSE	0.00649351	CID	No	N/A	N/A	N/A	N/A	1	20.04	403	208	208	669	208	208	697	208	403	208	208
TSSEPEVSVLPK|S3: Phospho	124	gi|40807475|ref|NP_115528.3|	1	PML-RARA regulated adaptor molecule 1 [Homo sapiens]	93378	93378	1	20	TSSEPEVSVLPK	S3: Phospho	S298: Phospho	654.353	3	1960.04	-0.001841	19.61	1	296	307	R	R	0	2012-08-10-Look-iTRAQ-pST-11-700.3300.3300.3.dta - 654.35210|203|614|566|203|332|203|388|825	1068	['unresolved: gi|40807475|ref|NP_115528.3|']	S298: Phospho	FALSE	['NA']	FALSE	0	HCD	Yes	Yes	Yes	17.59	2.02	1	19.61	203	614	566	203	332	203	388	825	203	614	566
GPKPEPPGSGSPAPPR|S11: Phospho	174	gi|50962882|ref|NP_001002909.1|	1	G patch domain containing 8 [Homo sapiens]	204253	204253	1	21	GPKPEPPGSGSPAPPR	S11: Phospho	S740: Phospho	554.798	4	2215.16	0.000837	21.28	1	730	745	R	R	0	2012-08-10-Look-iTRAQ-pST-11-230.2437.2437.4.dta - 554.79820|210|210|636|689|636|210|270|210	2542	['GPATCH8']	S740: Phospho	FALSE	['NA']	FALSE	0.00671141	HCD	No	N/A	N/A	N/A	N/A	1	21.28	210	210	636	689	636	210	270	210	210	210	636
NMLAFSSPAAGGVCEPLKSPQR|M2: Oxidation; S19: Phospho	18	gi|90652851|ref|NP_054831.2|	1	zinc finger transcription factor TRPS1 [Homo sapiens]	175578	175578	3	47	NMLAFSSPAAGGVCEPLKSPQR	M2: Oxidation; S19: Phospho	M123: Oxidation; S140: Phospho	756.131	4	3020.51	-0.01104	27.41	1	122	143	R	A	1	2012-08-10-Look-iTRAQ-pST-20-70.2921.2921.4.dta - 756.13210|217|217|646|217|217|217|217|217	1273	['TRPS1']	S140: Phospho	FALSE	['NA']	FALSE	0	HCD	No	N/A	N/A	N/A	N/A	2	27.49	217	217	646	217	217	217	217	217	217	217	646
LSSSWESLQPEPSHPY|S4: Phospho	27	gi|67782319|ref|NP_000338.3|	1	spectrin beta isoform b [Homo sapiens]	287935	287935	1	16	LSSSWESLQPEPSHPY	S4: Phospho	S2125: Phospho	743.344	3	2227.01	-0.004677	17.04	1	2122	2137	R	-	0	2012-08-10-Look-iTRAQ-pST-22p5-230.3240.3240.3.dta - 743.34390|580|299|852|218|574|609|912|376	800	['SPTB']	S2125: Phospho	FALSE	['NA']	FALSE	0	HCD	No	N/A	N/A	N/A	N/A	9	29.1	1428	1147	1803	1428	1572	1515	4242	1224	580	299	852
SNSVEKPVSSILSR|S3: Phospho	170	gi|7706687|ref|NP_057421.1|	1	Enah/Vasp-like [Homo sapiens]	52179	52179	1	18	SNSVEKPVSSILSR	S3: Phospho	S333: Phospho	548.552	4	2190.19	-0.006746	18.1	1	331	344	R	T	0	2012-08-10-Look-iTRAQ-pST-15-230.3173.3173.4.dta - 548.55190|206|318|325|206|206|206|841|206	1582	['EVL']	S333: Phospho	FALSE	['NA']	FALSE	0	HCD	No	N/A	N/A	N/A	N/A	1	18.1	206	318	325	206	206	206	841	206	206	318	325
KEQSEVSVSPR|S9: Phospho	121	gi|38146107|ref|NP_075388.2|	1	arginine/serine-rich coiled-coil 2 isoform a [Homo sapiens]	65797	65797	1	29	KEQSEVSVSPR	S9: Phospho	S32: Phospho	484.258	4	1933.01	-0.010891	28.56	1	24	34	K	A	1	2012-08-10-Look-iTRAQ-pST-9-230.2699.2699.4.dta - 484.25800|206|452|363|775|320|206|206|394	2437	['RSRC2']	S32: Phospho				0	HCD	No	N/A	N/A	N/A	N/A	1	28.56	206	452	363	775	320	206	206	394	206	452	363
SLPAEEGSSGK|S1: Phospho	276	gi|50962882|ref|NP_001002909.1|	1	G patch domain containing 8 [Homo sapiens]	204253	204253	1	11	SLPAEEGSSGK	S1: Phospho	S758: Phospho	583.967	3	1748.88	-0.00182	11.41	1	758	768	R	K	0	2012-08-10-Look-iTRAQ-pST-0-700.2945.2945.3.dta - 583.96690|294|418|581|375|749|210|359|921	1878	['GPATCH8']	S758: Phospho				0.00552486	HCD	No	N/A	N/A	N/A	N/A	1	11.41	294	418	581	375	749	210	359	921	294	418	581
ELQFSVEDINR|S5: Phospho	24	gi|70780353|ref|NP_065208.2|; gi|215598574|ref|NP_001135918.1|; gi|70780355|ref|NP_065210.2|; gi|70780357|ref|NP_000028.3|; gi|70780359|ref|NP_065209.2|	5	ankyrin 1 isoform 4 [Homo sapiens]; ankyrin 1 isoform 9 [Homo sapiens]; ankyrin 1 isoform 2 [Homo sapiens]; ankyrin 1 isoform 3 [Homo sapiens]; ankyrin 1 isoform 1 [Homo sapiens]	230942; 238816; 215823; 234778; 234409	230942	1	53	ELQFSVEDINR	S5: Phospho	S1428: Phospho	578.618	3	1732.83	-0.001332	52.68	1	1424	1434	R	I	0	2012-08-10-Look-iTRAQ-pST-13-700.3749.3749.3.dta - 578.61740|386|213|213|361|213|397|463|762	638	['ANK1']	S1428: Phospho	FALSE	['NA']	FALSE	0	HCD	Yes	Yes	Yes	15.65	37.03	1	52.68	386	213	213	361	213	397	463	762	386	213	213
LKAVAGVMITASHNR|M8: Oxidation; T10: Phospho	42	gi|31377548|ref|NP_775853.2|	1	phosphoglucomutase 2-like 1 [Homo sapiens]	86880	86880	1	35	LKAVAGVMITASHNR	M8: Oxidation; T10: Phospho	M171: Oxidation; T173: Phospho	568.815	4	2271.24	-0.008157	35.08	1	164	178	K	K	1	2012-08-10-Look-iTRAQ-pST-20-30.2829.2829.4.dta - 568.81510|443|825|784|695|574|537|537|922	1432	['PGM2L1']	T173: Phospho	FALSE	['NA']	FALSE	0	CID	Yes	Yes	M8: Oxidation; S12: Phospho	16.92	18.16	1	35.08	443	825	784	695	574	537	537	922	443	825	784
TIVMGASFR|M4: Oxidation; S7: Phospho	99	gi|5803187|ref|NP_006746.1|	1	transaldolase 1 [Homo sapiens]	47118	47118	3	35	TIVMGASFR	M4: Oxidation; S7: Phospho	M234: Oxidation; S237: Phospho	691.344	2	1380.68	-0.004005	24.92	1	231	239	K	N	0	2012-08-10-Look-iTRAQ-pST-15-70.4090.4090.2.dta - 691.34400|3497|4471|5865|4587|4579|6464|5174|6841	1015	['TALDO1']	S237: Phospho	FALSE	['NA']	FALSE	0	HCD	No	N/A	N/A	N/A	N/A	1	24.92	3497	4471	5865	4587	4579	6464	5174	6841	3497	4471	5865
AMSQDGASQFQEVIR|M2: Oxidation; S3: Phospho	137	gi|48255966|ref|NP_006750.3|	1	UDP-glucose pyrophosphorylase 2 isoform a [Homo sapiens]	69852	69852	1	27	AMSQDGASQFQEVIR	M2: Oxidation; S3: Phospho	M12: Oxidation; S13: Phospho	689.657	3	2065.94	0.003826	27.22	1	11	25	K	Q	0	2012-08-10-Look-iTRAQ-pST-11-230.4879.4879.3.dta - 689.65630|384|852|621|1098|1415|815|998|1708	2411	['UGP2']	S13: Phospho	FALSE	['NA']	FALSE	0.00460829	HCD	Yes	Yes	Yes	24.6	2.62	1	27.22	384	852	621	1098	1415	815	998	1708	384	852	621
QTSTQTVETR|T4: Phospho	124	gi|23510377|ref|NP_694856.1|; gi|64464726|ref|NP_055973.2|	2	KN motif and ankyrin repeat domains 1 isoform b [Homo sapiens]; KN motif and ankyrin repeat domains 1 isoform a [Homo sapiens]	150272; 171837	150272	1	18	QTSTQTVETR	T4: Phospho	T551: Phospho	512.247	3	1533.73	-0.013896	18.25	1	548	557	K	T	0	2012-08-10-Look-iTRAQ-pST-15-230.1723.1723.3.dta - 512.24810|270|436|656|796|444|366|207|543	689	['KANK1']	T551: Phospho	FALSE	['NA']	FALSE	0.00520833	CID	No	N/A	N/A	N/A	N/A	1	18.25	270	436	656	796	444	366	207	543	270	436	656
STLNPQWNESFTFK|S10: Phospho	53	gi|4506067|ref|NP_002728.1|	1	protein kinase C, alpha [Homo sapiens]	96107	96107	1	41	STLNPQWNESFTFK	S10: Phospho	S226: Phospho	796.4	3	2386.18	-0.004614	40.65	1	217	230	R	L	0	2012-08-10-Look-iTRAQ-pST-17p5-230.3889.3889.3.dta - 796.40000|571|2116|918|2184|776|220|620|1214	1047	['PRKCA']	S226: Phospho	TRUE	['sp|P17252|KPCA_HUMAN Protein kinase C alpha type OS=Homo sapiens GN=PRKCA PE=1 SV=4']	TRUE	0	HCD	No	N/A	N/A	N/A	N/A	1	40.65	571	2116	918	2184	776	220	620	1214	571	2116	918
LQEEGGGSDEEETGSPSEDGMQSAR|T13: Phospho; M21: Oxidation	28	gi|5902034|ref|NP_008993.1|	1	periodic tryptophan protein 1 [Homo sapiens]	65185	65185	3	34	LQEEGGGSDEEETGSPSEDGMQSAR	T13: Phospho; M21: Oxidation	T55: Phospho; M63: Oxidation	994.74	3	2981.2	-0.003471	34.2	1	43	67	K	T	0	2012-08-10-Look-iTRAQ-pST-17p5-700.2244.2244.3.dta - 994.74080|213|213|563|213|213|213|213|213	746	['PWP1']	T55: Phospho	FALSE	['NA']	FALSE	0	HCD	Yes	Yes	S8: Phospho; M21: Oxidation	27.19	7.01	2	45.07	213	213	563	213	213	213	213	213	213	213	563
FIVSPVPESR|S4: Phospho	23	gi|148612809|ref|NP_061852.2|	1	WNK lysine deficient protein kinase 1 [Homo sapiens]	285246	285246	2	66	FIVSPVPESR	S4: Phospho	S1261: Phospho	757.898	2	1513.78	-0.002508	48.41	1	1258	1267	R	L	0	2012-08-10-Look-iTRAQ-pST-13-230.4592.4592.2.dta - 757.89870|1995|2956|1870|3493|3094|4272|7197|5478	974	['unresolved: gi|148612809|ref|NP_061852.2|']	S1261: Phospho	TRUE	['sp|Q9H4A3|WNK1_HUMAN Serine/threonine-protein kinase WNK1 OS=Homo sapiens GN=WNK1 PE=1 SV=2']	TRUE	0	HCD	No	N/A	N/A	N/A	N/A	1	48.41	1995	2956	1870	3493	3094	4272	7197	5478	1995	2956	1870
IDFIPVSPAPSPTR|S7: Phospho; S11: Phospho	27	gi|49472830|ref|NP_612206.3|	1	hypothetical protein LOC116224 [Homo sapiens]	34141	34141	2	40	IDFIPVSPAPSPTR	S7: Phospho; S11: Phospho	S143: Phospho; S147: Phospho	654.321	3	1959.94	-0.001481	39.74	1	137	150	R	G	0	2012-08-10-Look-iTRAQ-pST-15-700.3695.3695.3.dta - 654.31980|211|211|532|211|211|425|475|211	522	['FAM122A']	S143: Phospho; S147: Phospho	FALSE	['NA']	FALSE	0	HCD	No	N/A	N/A	N/A	N/A	1	39.74	211	211	532	211	211	425	475	211	211	211	532
RGSSSSSPEHSASSDSTK|S3: Phospho; S4: Phospho	158	gi|122114651|ref|NP_079366.3|	1	ubiquitin specific peptidase 36 [Homo sapiens]	152738	152738	1	21	RGSSSSSPEHSASSDSTK	S3: Phospho; S4: Phospho	S610: Phospho; S611: Phospho	641.287	4	2561.13	-0.005101	21.45	1	608	625	R	A	1	2012-08-10-Look-iTRAQ-pST-9-700.1539.1539.4.dta - 641.28800|209|421|903|509|286|209|209|209	1925	['USP36']	S610: Phospho; S611: Phospho	FALSE	['NA']	FALSE	0	HCD	No	N/A	N/A	N/A	N/A	1	21.45	209	421	903	509	286	209	209	209	209	421	903
NSPDECSVAK|S2: Phospho	202	gi|4758300|ref|NP_004440.1|; gi|209954797|ref|NP_001129626.1|; gi|33667107|ref|NP_891548.1|	3	ets-related isoform 2 [Homo sapiens]; ets-related isoform 3 [Homo sapiens]; ets-related isoform 1 [Homo sapiens]	59889; 62464; 61694	59889	1	23	NSPDECSVAK	S2: Phospho	S88: Phospho	598.952	3	1793.85	-0.01235	22.85	1	87	96	R	G	0	2012-08-10-Look-iTRAQ-pST-0-700.2344.2344.3.dta - 598.95250|208|208|2085|525|361|1451|671|208	1997	['ERG']	S88: Phospho				0.00226757	HCD	No	N/A	N/A	N/A	N/A	1	22.85	208	208	2085	525	361	1451	671	208	208	208	2085
NIGSDFIPR|S4: Phospho	51	gi|22035598|ref|NP_005195.2|	1	mitogen-activated protein kinase kinase kinase 8 [Homo sapiens]	61560	61560	2	49	NIGSDFIPR	S4: Phospho	S141: Phospho	701.855	2	1401.7	-0.001346	35.83	1	138	146	R	G	0	2012-08-10-Look-iTRAQ-pST-15-230.3807.3807.2.dta - 701.85360|1493|3923|3316|2149|2659|3121|2525|7183	560	['MAP3K8']	S141: Phospho	TRUE	['sp|P41279|M3K8_HUMAN Mitogen-activated protein kinase kinase kinase 8 OS=Homo sapiens GN=MAP3K8 PE=1 SV=2']	TRUE	0	HCD	Yes	Yes	Yes	19.22	16.61	2	48.78	2020	4970	4296	2800	3120	3773	3189	8967	1493	3923	3316
FFDSFGNLSSASAIMGNPK|S10: Phospho; M15: Oxidation	30	gi|6715607|ref|NP_000175.1|; gi|28302131|ref|NP_000550.2|	2	G-gamma globin [Homo sapiens]; A-gamma globin [Homo sapiens]	20128; 20130	20128	2	21	FFDSFGNLSSASAIMGNPK	S10: Phospho; M15: Oxidation	S51: Phospho; M56: Oxidation	898.77	3	2693.3	-0.014628	20.92	1	42	60	R	V	0	2012-08-10-Look-iTRAQ-pST-22p5-230.4258.4258.3.dta - 898.77330|211|211|211|211|211|211|742|211	888	['HBG2', 'HBG1']	S51: Phospho	FALSE	['NA']	FALSE	0	CID	No	N/A	N/A	N/A	N/A	2	21.25	211	211	211	211	211	211	742	211	211	211	211
AQSVSPVQAPPPGGSAQLLPGK|S3: Phospho	128	gi|112421108|ref|NP_055940.3|	1	capicua homolog [Homo sapiens]	184671	184671	1	19	AQSVSPVQAPPPGGSAQLLPGK	S3: Phospho	S902: Phospho	694.379	4	2773.5	-0.012205	19.46	1	900	921	K	V	0	2012-08-10-Look-iTRAQ-pST-15-70.4147.4147.4.dta - 694.37890|208|208|607|208|208|455|208|433	2173	['CIC']	S902: Phospho	FALSE	['NA']	FALSE	0	CID	Yes	Yes	S5: Phospho	15.4	4.06	1	19.46	208	208	607	208	208	455	208	433	208	208	607
GVTIPYRPKPSSSPVIFAGGQDR|S13: Phospho	86	gi|14141166|ref|NP_114366.1|; gi|14141168|ref|NP_005007.2|; gi|193083108|ref|NP_001122383.1|; gi|193083110|ref|NP_001122384.1|	4	poly(rC) binding protein 2 isoform b [Homo sapiens]; poly(rC) binding protein 2 isoform a [Homo sapiens]; poly(rC) binding protein 2 isoform d [Homo sapiens]; poly(rC) binding protein 2 isoform e [Homo sapiens]	44072; 44501; 44430; 44001	44072	1	14	GVTIPYRPKPSSSPVIFAGGQDR	S13: Phospho	S185: Phospho	780.17	4	3116.66	-0.011169	15.13	1	173	195	K	Y	0	2012-08-10-Look-iTRAQ-pST-20-70.2815.2815.4.dta - 780.17000|214|350|551|357|512|273|795|214	1280	['PCBP2']	S185: Phospho	FALSE	['NA']	FALSE	0	HCD	No	N/A	N/A	N/A	N/A	1	15.13	214	350	551	357	512	273	795	214	214	350	551
AHTPTPGIYMGRPTHSGGGGGGGGGGGGGGGGR|T5: Phospho	24	gi|9558733|ref|NP_037425.1|	1	transformer-2 alpha [Homo sapiens]	34856	34856	12	48	AHTPTPGIYMGRPTHSGGGGGGGGGGGGGGGGR	T5: Phospho	T204: Phospho	794.618	4	3174.45	-0.004651	29.47	1	200	232	R	R	0	2012-08-10-Look-iTRAQ-pST-20-30.1845.1845.4.dta - 794.61870|213|213|524|213|213|213|213|213	1605	['TRA2A']	T204: Phospho	FALSE	['NA']	FALSE	0	CID	Yes	Yes	T3: Phospho	23.26	6.21	1	29.47	213	213	524	213	213	213	213	213	213	213	524
SPSPPTIQSK|S1: Phospho; S3: Phospho	183	gi|44955926|ref|NP_055430.1|; gi|197333879|ref|NP_001127945.1|	2	genetic suppressor element 1 isoform 1 [Homo sapiens]; genetic suppressor element 1 isoform 2 [Homo sapiens]	155531; 143694	155531	1	17	SPSPPTIQSK	S1: Phospho; S3: Phospho	S826: Phospho; S828: Phospho	603.967	3	1808.89	-0.013663	17	1	826	835	R	R	0	2012-08-10-Look-iTRAQ-pST-9-700.2725.2725.3.dta - 603.96750|716|266|2350|1024|1705|1752|741|1345	1101	['KIAA0182']	S826: Phospho; S828: Phospho	FALSE	['NA']	FALSE	0	HCD	No	N/A	N/A	N/A	N/A	1	17	716	266	2350	1024	1705	1752	741	1345	716	266	2350
ASSFADMMGILK|S3: Phospho	16	gi|153251745|ref|NP_062457.3|; gi|153251748|ref|NP_001093095.1|; gi|153251766|ref|NP_001093096.1|	3	hypothetical protein LOC56181 isoform a [Homo sapiens]	37261	37261	7	45	ASSFADMMGILK	S3: Phospho	S238: Phospho	653.667	3	1957.99	-0.006413	23.41	1	236	247	K	D	0	2012-08-10-Look-iTRAQ-pST-20-230.4053.4053.3.dta - 653.66860|210|357|210|422|210|210|210|549	621	['FAM54B']	S238: Phospho	FALSE	['NA']	FALSE	0	CID	Yes	Yes	Yes	9.94	13.47	1	23.41	210	357	210	422	210	210	210	549	210	357	210
RFSDFLGLHSK|S3: Phospho	42	gi|23111038|ref|NP_003091.2|	1	sorting nexin 2 [Homo sapiens]	71325	71325	2	23	RFSDFLGLHSK	S3: Phospho	S185: Phospho	499.52	4	1994.06	-0.008597	15.08	1	183	193	R	L	1	2012-08-10-Look-iTRAQ-pST-20-110.3333.3333.4.dta - 499.52140|223|454|676|223|223|223|223|470	1008	['SNX2']	S185: Phospho	FALSE	['NA']	FALSE	0	CID	No	N/A	N/A	N/A	N/A	1	15.08	223	454	676	223	223	223	223	470	223	454	676
LQEEGGGSDEEETGSPSEDGMQSAR|S8: Phospho; M21: Oxidation	14	gi|5902034|ref|NP_008993.1|	1	periodic tryptophan protein 1 [Homo sapiens]	65185	65185	4	45	LQEEGGGSDEEETGSPSEDGMQSAR	S8: Phospho; M21: Oxidation	S50: Phospho; M63: Oxidation	994.742	3	2981.2	0.000489	39.33	1	43	67	K	T	0	2012-08-10-Look-iTRAQ-pST-20-700.2342.2342.3.dta - 994.74280|208|208|506|208|208|208|208|208	711	['PWP1']	S50: Phospho	FALSE	['NA']	FALSE	0	HCD	Yes	Yes	Yes	38.91	0.42	7	39.33	208	208	506	208	208	208	208	208	208	208	506
SSDEDAAGEPK|S1: Phospho	166	gi|21359969|ref|NP_006459.3|	1	polymerase (RNA) III (DNA directed) polypeptide C (62kD) [Homo sapiens]	71924	71924	1	29	SSDEDAAGEPK	S1: Phospho	S204: Phospho	598.618	3	1792.83	-0.001965	29.08	1	204	214	R	A	0	2012-08-10-Look-iTRAQ-pST-0-700.2104.2104.3.dta - 598.61800|670|559|2525|890|628|1211|582|678	1996	['POLR3C']	S204: Phospho				0	HCD	Yes	Yes	S2: Phospho	21.09	7.99	1	29.08	670	559	2525	890	628	1211	582	678	670	559	2525
ESGSPYSVLVDTK|S7: Phospho	82	gi|7662384|ref|NP_055712.1|; gi|223941846|ref|NP_001138837.1|	2	zinc finger protein 652 [Homo sapiens]	89263	89263	1	21	ESGSPYSVLVDTK	S7: Phospho	S60: Phospho	690.688	3	2069.05	-0.013109	23.42	1	54	66	R	M	0	2012-08-10-Look-iTRAQ-pST-13-700.3457.3457.3.dta - 690.68910|731|210|1518|874|380|960|210|1126	961	['ZNF652']	S60: Phospho	FALSE	['NA']	FALSE	0.00952381	CID	Yes	Yes	S4: Phospho	20.08	3.34	1	23.42	731	210	1518	874	380	960	210	1126	731	210	1518
KRSPSPSPTPEAK|S5: Phospho; S7: Phospho	243	gi|21237805|ref|NP_003066.2|; gi|194363725|ref|NP_001123892.1|; gi|21237808|ref|NP_620706.1|	3	SWI/SNF-related matrix-associated actin-dependent regulator of chromatin c2 isoform a [Homo sapiens]; SWI/SNF-related matrix-associated actin-dependent regulator of chromatin c2 isoform c [Homo sapiens]; SWI/SNF-related matrix-associated actin-dependent regulator of chromatin c2 isoform b [Homo sapiens]	161487; 157057; 154975	161487	1	13	KRSPSPSPTPEAK	S5: Phospho; S7: Phospho	S304: Phospho; S306: Phospho	614.325	4	2453.28	-0.01338	13.67	1	300	312	R	K	2	2012-08-10-Look-iTRAQ-pST-11-230.1917.1917.4.dta - 614.32560|213|450|1113|683|695|1091|404|642	2624	['SMARCC2']	S304: Phospho; S306: Phospho	FALSE	['NA']	FALSE	0.00925926	HCD	No	N/A	N/A	N/A	N/A	1	13.67	213	450	1113	683	695	1091	404	642	213	450	1113
SSAQLQGCLLSCGVR|S2: Phospho	9	gi|157688564|ref|NP_001099010.1|	1	diacylglycerol kinase zeta isoform 4 [Homo sapiens]	142435	142435	4	74	SSAQLQGCLLSCGVR	S2: Phospho	S53: Phospho	673.993	3	2018.96	-0.00212	46.78	1	52	66	R	A	0	2012-08-10-Look-iTRAQ-pST-15-70.4306.4306.3.dta - 673.99270|215|215|512|215|215|215|215|215	1872	['DGKZ']	S53: Phospho	FALSE	['NA']	FALSE	0	CID	Yes	Yes	Yes	37.72	9.06	1	46.78	215	215	512	215	215	215	215	215	215	215	512
GSTSFLDTRF|S4: Phospho	64	gi|38348348|ref|NP_940919.1|	1	TBC1 domain family, member 10C [Homo sapiens]	54453	54453	2	31	GSTSFLDTRF	S4: Phospho	S440: Phospho	505.577	3	1513.71	-0.00363	30.93	1	437	446	R	-	1	2012-08-10-Look-iTRAQ-pST-15-230.4455.4455.3.dta - 505.57680|202|323|202|202|202|253|1130|315	668	['TBC1D10C']	S440: Phospho	FALSE	['NA']	FALSE	0	CID	Yes	Yes	S2: Phospho	22.9	8.03	1	30.93	202	323	202	202	202	253	1130	315	202	323	202
SLPVSVPVWGFK|S1: Phospho	22	gi|148806884|ref|NP_001092103.1|; gi|148806896|ref|NP_115751.2|; gi|148806906|ref|NP_001092102.1|	3	AKT1 substrate 1 (proline-rich) [Homo sapiens]	29724	29724	1	11	SLPVSVPVWGFK	S1: Phospho	S183: Phospho	668.709	3	2003.11	-0.00598	11.4	1	183	194	K	E	0	2012-08-10-Look-iTRAQ-pST-22p5-70.4006.4006.3.dta - 668.71040|218|218|547|218|218|218|218|218	932	['AKT1S1']	S183: Phospho	FALSE	['NA']	FALSE	0	HCD	No	N/A	N/A	N/A	N/A	3	22.59	434	434	1023	434	434	434	434	434	218	218	547
LDQVVESPAIPR|S7: Phospho	4	gi|70780353|ref|NP_065208.2|; gi|215598574|ref|NP_001135918.1|; gi|70780355|ref|NP_065210.2|; gi|70780357|ref|NP_000028.3|; gi|70780359|ref|NP_065209.2|	5	ankyrin 1 isoform 4 [Homo sapiens]; ankyrin 1 isoform 9 [Homo sapiens]; ankyrin 1 isoform 2 [Homo sapiens]; ankyrin 1 isoform 3 [Homo sapiens]; ankyrin 1 isoform 1 [Homo sapiens]	230942; 238816; 215823; 234778; 234409	230942	6	115	LDQVVESPAIPR	S7: Phospho	S856: Phospho	569.97	3	1706.89	-0.003691	50.14	1	850	861	K	I	0	2012-08-10-Look-iTRAQ-pST-13-230.4633.4633.3.dta - 569.96990|209|209|209|209|209|209|209|563	1299	['ANK1']	S856: Phospho	FALSE	['NA']	FALSE	0	HCD	No	N/A	N/A	N/A	N/A	1	50.14	209	209	209	209	209	209	209	563	209	209	209
MGAPESGLAEYLFDKHTLGDSDNES|M1: Oxidation; S25: Phospho	33	gi|56682959|ref|NP_002023.2|	1	ferritin, heavy polypeptide 1 [Homo sapiens]	25642	25642	1	29	MGAPESGLAEYLFDKHTLGDSDNES	M1: Oxidation; S25: Phospho	M159: Oxidation; S183: Phospho	847.644	4	3386.55	-0.002189	29.32	1	159	183	K	-	1	2012-08-10-Look-iTRAQ-pST-22p5-700.4213.4213.4.dta - 847.64430|212|212|212|212|212|212|647|212	1067	['FTH1']	S183: Phospho	FALSE	['NA']	FALSE	0	HCD	No	N/A	N/A	N/A	N/A	1	29.32	212	212	212	212	212	212	647	212	212	212	212
RRSPSPTPTPGPSR|S3: Phospho; S5: Phospho	215	gi|4502775|ref|NP_001800.1|; gi|109637779|ref|NP_001035891.1|	2	centromere protein A isoform a [Homo sapiens]; centromere protein A isoform b [Homo sapiens]	18471; 15123	18471	1	14	RRSPSPTPTPGPSR	S3: Phospho; S5: Phospho	S17: Phospho; S19: Phospho	652.983	3	1955.93	-0.002707	14.91	1	15	28	R	R	2	2012-08-10-Look-iTRAQ-pST-9-230.1518.1518.3.dta - 652.98280|1923|783|2170|1097|630|1324|869|2182	2473	['CENPA']	S17: Phospho; S19: Phospho				0.00886918	HCD	No	N/A	N/A	N/A	N/A	1	14.91	1923	783	2170	1097	630	1324	869	2182	1923	783	2170
SSGSPYGGGYGSGGGSGGYGSR|S21: Phospho	1	gi|34740329|ref|NP_919223.1|	1	heterogeneous nuclear ribonucleoprotein A3 [Homo sapiens]	46491	46491	3	103	SSGSPYGGGYGSGGGSGGYGSR	S21: Phospho	S375: Phospho	765.659	3	2293.95	-0.000255	81.16	1	355	376	R	R	0	2012-08-10-Look-iTRAQ-pST-20-230.1923.1923.3.dta - 765.65940|210|210|210|600|455|297|371|467	761	['HNRNPA3']	S375: Phospho	FALSE	['NA']	FALSE	0	HCD	Yes	Yes	Yes	48.97	32.19	3	81.16	629	629	629	1259	874	903	790	1123	210	210	210
ILGQSSPEKK|S6: Phospho	195	gi|115334673|ref|NP_075376.2|; gi|115334677|ref|NP_002883.3|; gi|115334679|ref|NP_075377.2|	3	retinoblastoma-binding protein 1 isoform II [Homo sapiens]; retinoblastoma-binding protein 1 isoform I [Homo sapiens]; retinoblastoma-binding protein 1 isoform III [Homo sapiens]	176870; 185918; 175327	176870	1	14	ILGQSSPEKK	S6: Phospho	S864: Phospho	520.553	4	2078.19	-0.007044	14.67	1	859	868	K	I	1	2012-08-10-Look-iTRAQ-pST-15-230.2526.2526.4.dta - 520.55310|539|396|1366|646|929|998|664|769	1510	['ARID4A']	S864: Phospho	FALSE	['NA']	FALSE	0	HCD	No	N/A	N/A	N/A	N/A	1	14.67	539	396	1366	646	929	998	664	769	539	396	1366
RDSELGPGVK|S3: Phospho	23	gi|33356148|ref|NP_005883.2|	1	formin-like 1 [Homo sapiens]	143178	143178	1	46	RDSELGPGVK	S3: Phospho	S624: Phospho	582.649	3	1744.93	-0.007339	46.14	1	622	631	R	A	1	2012-08-10-Look-iTRAQ-pST-9-230.3144.3144.3.dta - 582.64950|203|1495|2467|1031|1857|2381|1872|1942	2006	['FMNL1']	S624: Phospho				0	CID	Yes	Yes	Yes	33.02	13.12	3	46.14	616	3617	5333	2633	4094	5944	3773	3711	203	1495	2467
TSTSPPPEK|S4: Phospho	224	gi|56118310|ref|NP_073568.2|	1	nuclear casein kinase and cyclin-dependent kinase substrate 1 [Homo sapiens]	39144	39144	3	20	TSTSPPPEK	S4: Phospho	S223: Phospho	816.423	2	1630.84	-0.011617	18.61	1	220	228	K	S	0	2012-08-10-Look-iTRAQ-pST-0-700.2158.2158.2.dta - 816.42290|821|1927|3509|1980|2221|2765|2289|1345	1582	['NUCKS1']	S223: Phospho				0.00184843	HCD	No	N/A	N/A	N/A	N/A	2	18.61	1368	3150	5065	3070	2942	3738	3372	2046	821	1927	3509
SSSLGIPDADCCR|S3: Phospho	128	gi|6005810|ref|NP_009112.1|; gi|110611908|ref|NP_001036065.1|	2	mitogen-activated protein kinase kinase kinase kinase 1 isoform 2 [Homo sapiens]; mitogen-activated protein kinase kinase kinase kinase 1 isoform 1 [Homo sapiens]	105954; 104969	105954	1	28	SSSLGIPDADCCR	S3: Phospho	S326: Phospho	607.927	3	1820.77	-0.014202	28.35	1	324	336	R	R	0	2012-08-10-Look-iTRAQ-pST-11-230.3979.3979.3.dta - 607.92770|570|212|1108|212|385|489|636|564	1999	['MAP4K1']	S326: Phospho	TRUE	['sp|Q92918|M4K1_HUMAN Mitogen-activated protein kinase kinase kinase kinase 1 OS=Homo sapiens GN=MAP4K1 PE=1 SV=1']	TRUE	0.00485437	HCD	No	N/A	N/A	N/A	N/A	1	28.35	570	212	1108	212	385	489	636	564	570	212	1108
AASAATAAPTATPAAQESGTIPK|S3: Phospho	65	gi|4501993|ref|NP_003650.1|	1	alkyldihydroxyacetone phosphate synthase precursor [Homo sapiens]	85832	85832	1	30	AASAATAAPTATPAAQESGTIPK	S3: Phospho	S65: Phospho	924.486	3	2770.44	0.000147	30.18	1	63	85	R	K	0	2012-08-10-Look-iTRAQ-pST-11-230.3788.3788.3.dta - 924.48680|206|206|206|206|206|206|206|527	2712	['AGPS']	S65: Phospho	FALSE	['NA']	FALSE	0	CID	No	N/A	N/A	N/A	N/A	1	30.18	206	206	206	206	206	206	206	527	206	206	206
ILIVTQTPHYMR|T7: Phospho	24	gi|39725634|ref|NP_056130.2|; gi|61102725|ref|NP_291029.2|	2	la related protein isoform 1 [Homo sapiens]; la related protein isoform 2 [Homo sapiens]	142345; 150299	142345	7	34	ILIVTQTPHYMR	T7: Phospho	T572: Phospho	619.328	3	1854.97	-0.009791	26.09	1	566	577	K	R	0	2012-08-10-Look-iTRAQ-pST-20-70.3270.3270.3.dta - 619.32890|214|214|544|214|504|214|609|214	885	['LARP1', 'unresolved: gi|61102725|ref|NP_291029.2|']	T572: Phospho	FALSE	['NA']	FALSE	0	CID	Yes	Yes	Yes	24.71	1.38	1	26.09	214	214	544	214	504	214	609	214	214	214	544
VVSSTSEEEEAFTEK|S6: Phospho	80	gi|194306541|ref|NP_060472.2|; gi|194306543|ref|NP_851999.2|	2	oxidation resistance 1 isoform 1 [Homo sapiens]; oxidation resistance 1 isoform 2 [Homo sapiens]	115833; 112803	115833	1	28	VVSSTSEEEEAFTEK	S6: Phospho	S203: Phospho	787.379	3	2359.13	-0.014326	28.02	1	198	212	R	F	0	2012-08-10-Look-iTRAQ-pST-9-700.3972.3972.3.dta - 787.37910|581|1331|848|787|209|1103|1015|1061	1800	['OXR1']	S203: Phospho	FALSE	['NA']	FALSE	0	CID	Yes	Yes	Yes	27.56	0.46	1	28.02	581	1331	848	787	209	1103	1015	1061	581	1331	848
GNDSDGEGESDDPEKK|S4: Phospho	31	gi|17865802|ref|NP_004860.2|	1	vacuolar protein sorting factor 4B [Homo sapiens]	62523	62523	1	32	GNDSDGEGESDDPEKK	S4: Phospho	S102: Phospho	668.562	4	2670.24	-0.023168	31.72	1	99	114	K	K	1	2012-08-10-Look-iTRAQ-pST-17p5-700.1907.1907.4.dta - 668.56300|270|762|1355|614|915|870|647|703	667	['VPS4B']	S102: Phospho	FALSE	['NA']	FALSE	0	HCD	No	N/A	N/A	N/A	N/A	1	31.72	270	762	1355	614	915	870	647	703	270	762	1355
DSCISPSEPETK|S5: Phospho	206	gi|19923717|ref|NP_612144.1|	1	deltex 3-like [Homo sapiens]	106792	106792	1	22	DSCISPSEPETK	S5: Phospho	S221: Phospho	679.993	3	2036.96	-0.001822	22.34	1	217	228	R	A	0	2012-08-10-Look-iTRAQ-pST-0-700.3028.3028.3.dta - 679.99290|358|497|211|745|522|211|587|834	2636	['DTX3L']	S221: Phospho				0.00220264	HCD	Yes	Yes	S2: Phospho	18.48	3.86	1	22.34	358	497	211	745	522	211	587	834	358	497	211
SPSPVQGK|S1: Phospho	211	gi|16579828|ref|NP_444251.1|	1	zinc finger protein 91 [Homo sapiens]	78863	78863	1	15	SPSPVQGK	S1: Phospho	S101: Phospho	496.604	3	1486.8	-0.009451	14.61	1	101	108	K	K	0	2012-08-10-Look-iTRAQ-pST-9-230.2332.2332.3.dta - 496.60450|209|547|1558|1172|530|985|678|209	1453	['ZFP91']	S101: Phospho				0.00863931	HCD	No	N/A	N/A	N/A	N/A	1	14.61	209	547	1558	1172	530	985	678	209	209	547	1558
AEFTSPPSLFK|S5: Phospho	65	gi|40254978|ref|NP_112179.2|; gi|201023339|ref|NP_001128409.1|; gi|201023341|ref|NP_001128410.1|	3	FIP1 like 1 isoform 1 [Homo sapiens]; FIP1 like 1 isoform 2 [Homo sapiens]; FIP1 like 1 isoform 3 [Homo sapiens]	76335; 75233; 66915	76335	1	27	AEFTSPPSLFK	S5: Phospho	S259: Phospho	638.005	3	1911	-0.007195	27.47	1	255	265	K	T	0	2012-08-10-Look-iTRAQ-pST-17p5-230.3820.3820.3.dta - 638.00550|1237|393|1039|1570|654|887|500|1168	793	['FIP1L1']	S259: Phospho	FALSE	['NA']	FALSE	0	CID	Yes	Yes	Yes	16.41	11.06	1	27.47	1237	393	1039	1570	654	887	500	1168	1237	393	1039
RNSTTIMSR|S3: Phospho; M7: Oxidation	178	gi|40255094|ref|NP_660327.2|; gi|262205374|ref|NP_001160071.1|; gi|262205380|ref|NP_001160072.1|	3	family with sequence similarity 122B isoform 1 [Homo sapiens]; family with sequence similarity 122B isoform 2 [Homo sapiens]; family with sequence similarity 122B isoform 3 [Homo sapiens]	30877; 30790; 30710	30877	2	19	RNSTTIMSR	S3: Phospho; M7: Oxidation	S50: Phospho; M54: Oxidation	489.242	3	1464.71	-0.003491	19.01	1	48	56	R	H	1	2012-08-10-Look-iTRAQ-pST-9-230.1369.1369.3.dta - 489.24170|1086|1815|2544|1585|852|2426|1706|1414	1417	['FAM122B']	S50: Phospho				0.0056338	HCD	No	N/A	N/A	N/A	N/A	1	19.01	1086	1815	2544	1585	852	2426	1706	1414	1086	1815	2544
RQSMAFSILNTPK|S3: Phospho; M4: Oxidation	73	gi|71361682|ref|NP_006176.2|	1	nuclear mitotic apparatus protein 1 [Homo sapiens]	285438	285438	5	36	RQSMAFSILNTPK	S3: Phospho; M4: Oxidation	S2047: Phospho; M2048: Oxidation	733.057	3	2196.16	-0.00895	30.9	1	2045	2057	R	K	1	2012-08-10-Look-iTRAQ-pST-20-30.3394.3394.3.dta - 733.05780|1152|1014|1279|1396|763|1586|1163|866	1413	['NUMA1']	S2047: Phospho	FALSE	['NA']	FALSE	0	HCD	Yes	Yes	Yes	24.4	6.5	5	35.64	4227	3267	6229	5018	1618	4292	4940	2069	1152	1014	1279
SPPPGPACPLLQR|S1: Phospho	27	gi|122939147|ref|NP_115885.2|; gi|122939149|ref|NP_001073625.1|; gi|122939151|ref|NP_001073626.1|	3	Rho GTPase activating protein 9 isoform 1 [Homo sapiens]; Rho GTPase activating protein 9 isoform 3 [Homo sapiens]; Rho GTPase activating protein 9 isoform 2 [Homo sapiens]	88477; 67191; 77480	88477	3	67	SPPPGPACPLLQR	S1: Phospho	S203: Phospho	887.454	2	1772.9	-0.001398	31.25	1	203	215	R	L	0	2012-08-10-Look-iTRAQ-pST-15-70.3812.3812.2.dta - 887.45390|983|3247|2444|1760|1307|1717|1493|2390	1582	['ARHGAP9']	S203: Phospho	FALSE	['NA']	FALSE	0	HCD	No	N/A	N/A	N/A	N/A	3	67.38	2865	5335	4690	3743	2429	2925	2816	5410	983	3247	2444
DHSPTPSVFNSDEER|S3: Phospho; S11: Phospho	139	gi|40254978|ref|NP_112179.2|; gi|201023339|ref|NP_001128409.1|; gi|201023341|ref|NP_001128410.1|	3	FIP1 like 1 isoform 1 [Homo sapiens]; FIP1 like 1 isoform 2 [Homo sapiens]; FIP1 like 1 isoform 3 [Homo sapiens]	76335; 75233; 66915	76335	2	34	DHSPTPSVFNSDEER	S3: Phospho; S11: Phospho	S492: Phospho; S500: Phospho	727.632	3	2179.88	-0.003737	25.04	1	490	504	R	Y	0	2012-08-10-Look-iTRAQ-pST-0-700.3604.3604.3.dta - 727.63160|450|345|1454|929|266|515|319|211	2778	['FIP1L1']	S492: Phospho; S500: Phospho				0	HCD	No	N/A	N/A	N/A	N/A	1	25.04	450	345	1454	929	266	515	319	211	450	345	1454
RLSLLR|S3: Phospho	67	gi|33356170|ref|NP_004136.2|; gi|194272142|ref|NP_001123537.1|; gi|4506501|ref|NP_000529.1|	3	myosin IXB isoform 1 [Homo sapiens]; myosin IXB isoform 2 [Homo sapiens]; regulatory factor X-associated protein [Homo sapiens]	296257; 280981; 34033	296257	2	43	RLSLLR	S3: Phospho	S1910: Phospho	381.23	3	1140.67	0.000687	15.81	1	1908	1913	R	Q	1	2012-08-10-Look-iTRAQ-pST-15-70.3363.3363.3.dta - 381.22850|1537|1328|1063|2958|1397|2819|2226|3277	532	['MYO9B', 'RFXAP']	S1910: Phospho	FALSE	['NA']	FALSE	0.00251256	HCD	No	N/A	N/A	N/A	N/A	1	15.81	1537	1328	1063	2958	1397	2819	2226	3277	1537	1328	1063
KGSGSEQEGEDEEGGER|S3: Phospho	22	gi|7661950|ref|NP_055448.1|	1	SH2 domain binding protein 1 [Homo sapiens]	167491	167491	1	44	KGSGSEQEGEDEEGGER	S3: Phospho	S941: Phospho	617.779	4	2467.1	-0.009619	44.37	1	939	955	R	K	1	2012-08-10-Look-iTRAQ-pST-15-700.1603.1603.4.dta - 617.77890|209|209|455|209|209|209|209|209	739	['CTR9']	S941: Phospho	FALSE	['NA']	FALSE	0	HCD	Yes	Yes	S5: Phospho	23.72	20.65	1	44.37	209	209	455	209	209	209	209	209	209	209	455
GSGTASDDEFENLR|S6: Phospho	11	gi|61676188|ref|NP_113584.3|	1	HECT, UBA and WWE domain containing 1 [Homo sapiens]	543931	543931	5	100	GSGTASDDEFENLR	S6: Phospho	S1907: Phospho	941.411	2	1880.81	-0.002753	41.64	1	1902	1915	R	I	0	2012-08-10-Look-iTRAQ-pST-0-700.4398.4398.2.dta - 941.41070|1719|2473|3140|2674|1886|3048|2872|2656	2259	['HUWE1']	S1907: Phospho				0	HCD	Yes	Yes	Yes	21.36	20.28	4	61.76	3233	5365	5610	5792	4109	6687	5789	4795	1719	2473	3140
SVIEPLPVTPTR|S1: Phospho	19	gi|42794769|ref|NP_002567.3|; gi|190886457|ref|NP_001122092.1|	2	p21-activated kinase 1 isoform 2 [Homo sapiens]; p21-activated kinase 1 isoform 1 [Homo sapiens]	75496; 75738	75496	6	74	SVIEPLPVTPTR	S1: Phospho	S204: Phospho	564.979	3	1691.92	-0.000928	33.13	1	204	215	R	D	0	2012-08-10-Look-iTRAQ-pST-13-230.4335.4335.3.dta - 564.97990|423|420|403|662|1014|997|492|881	1283	['PAK1']	S204: Phospho	TRUE	['sp|Q13153|PAK1_HUMAN Serine/threonine-protein kinase PAK 1 OS=Homo sapiens GN=PAK1 PE=1 SV=2']	TRUE	0	HCD	Yes	Yes	Yes	17.16	15.97	2	33.13	641	638	621	880	1232	1215	1533	1937	423	420	403
EIAQDFKTDLR|T8: Phospho	82	gi|4504279|ref|NP_002098.1|; gi|10440560|ref|NP_066298.1|; gi|183076548|ref|NP_001116847.1|; gi|21071021|ref|NP_003521.2|; gi|31742503|ref|NP_066403.2|; gi|4504281|ref|NP_003520.1|; gi|4504285|ref|NP_003522.1|; gi|4504287|ref|NP_003523.1|; gi|4504289|ref|NP_003524.1|; gi|4504291|ref|NP_003525.1|; gi|4504293|ref|NP_003526.1|; gi|4504295|ref|NP_003527.1|; gi|4504297|ref|NP_003528.1|; gi|4504299|ref…	16	H3 histone, family 3A [Homo sapiens]; histone cluster 1, H3f [Homo sapiens]; histone cluster 2, H3d [Homo sapiens]; histone cluster 1, H3d [Homo sapiens]; histone cluster 2, H3c [Homo sapiens]; histone cluster 1, H3a [Homo sapiens]; histone cluster 1, H3c [Homo sapiens]; histone cluster 1, H3e [Homo sapiens]; histone cluster 1, H3i [Homo sapiens]; H3 histone family, member H [Homo sapiens]; histo…	19634; 19767; 19694; 19767; 19694; 19767; 19767; 19767; 19767; 19767; 19767; 19767; 19767; 19871; 19694	19634	1	21	EIAQDFKTDLR	T8: Phospho	T81: Phospho	506.769	4	2023.06	-0.011923	20.77	1	74	84	R	F	1	2012-08-10-Look-iTRAQ-pST-13-700.3299.3299.4.dta - 506.76910|210|210|558|210|210|363|210|301	920	['H3F3A', 'HIST1H3F', 'HIST2H3D', 'HIST1H3D', 'HIST2H3C', 'HIST1H3A', 'HIST1H3C', 'HIST1H3E', 'HIST1H3I', 'HIST1H3G', 'HIST1H3J', 'HIST1H3H', 'HIST1H3B', 'HIST3H3', 'H3F3B', 'HIST2H3A']	T81: Phospho	FALSE	['NA']	FALSE	0	HCD	No	N/A	N/A	N/A	N/A	1	20.77	210	210	558	210	210	363	210	301	210	210	558
AGGSPASYHGSTSPR|S4: Phospho; S7: Phospho	68	gi|156671217|ref|NP_683723.2|	1	epsin 2 isoform a [Homo sapiens]	71444	71444	1	30	AGGSPASYHGSTSPR	S4: Phospho; S7: Phospho	S192: Phospho; S195: Phospho	632.606	3	1894.79	0.005127	30.99	1	189	203	K	V	0	2012-08-10-Look-iTRAQ-pST-11-700.1694.1694.3.dta - 632.60670|1876|1483|3446|3680|1980|3992|1441|2856	969	['EPN2']	S192: Phospho; S195: Phospho	FALSE	['NA']	FALSE	0	HCD	No	N/A	N/A	N/A	N/A	1	30.99	1876	1483	3446	3680	1980	3992	1441	2856	1876	1483	3446
ATTPADGEEPAPEAEALAAAR|T3: Phospho	21	gi|41327715|ref|NP_291028.3|	1	p53-related protein kinase [Homo sapiens]	32820	32820	3	59	ATTPADGEEPAPEAEALAAAR	T3: Phospho	T8: Phospho	1211.57	2	2421.14	-0.001395	49.82	1	6	26	R	E	0	2012-08-10-Look-iTRAQ-pST-0-700.5083.5083.2.dta - 1211.57510|208|357|950|273|208|593|416|208	2940	['TP53RK']	T8: Phospho				0	CID	No	N/A	N/A	N/A	N/A	3	58.7	411	560	1839	540	411	944	619	411	208	357	950
NYQQNYQNSESGEKNEGSESAPEGQAQQR|S11: Phospho	68	gi|34098946|ref|NP_004550.2|	1	nuclease sensitive element binding protein 1 [Homo sapiens]	41074	41074	2	27	NYQQNYQNSESGEKNEGSESAPEGQAQQR	S11: Phospho	S167: Phospho	987.193	4	3944.77	-0.022779	29.05	1	157	185	R	R	1	2012-08-10-Look-iTRAQ-pST-11-700.2125.2125.4.dta - 987.19320|205|205|431|205|205|205|205|205	1810	['YBX1']	S167: Phospho	FALSE	['NA']	FALSE	0	CID	Yes	Yes	S20: Phospho	14.68	14.37	2	29.05	205	205	431	205	205	205	205	205	205	205	431
HRNSADYSSESK|S4: Phospho	136	gi|34915994|ref|NP_008936.2|	1	transducin-like enhancer protein 4 [Homo sapiens]	98057	98057	1	25	HRNSADYSSESK	S4: Phospho	S222: Phospho	690.334	3	2067.98	-0.00422	26.17	1	219	230	K	K	1	2012-08-10-Look-iTRAQ-pST-9-700.1572.1572.3.dta - 690.33420|1278|1902|4534|1828|1594|4919|3631|1699	1576	['TLE4']	S222: Phospho	FALSE	['NA']	FALSE	0	HCD	Yes	Yes	Yes	19.87	6.3	1	26.17	1278	1902	4534	1828	1594	4919	3631	1699	1278	1902	4534
LVGIISSR|S7: Phospho	129	gi|66933016|ref|NP_000875.2|	1	inosine monophosphate dehydrogenase 2 [Homo sapiens]	67786	67786	2	29	LVGIISSR	S7: Phospho	S160: Phospho	614.85	2	1227.69	-0.00404	20.77	1	154	161	R	D	0	2012-08-10-Look-iTRAQ-pST-17p5-70.4131.4131.2.dta - 614.85020|10187|20535|32169|20956|16577|21495|10035|23660	585	['IMPDH2']	S160: Phospho	FALSE	['NA']	FALSE	0	HCD	No	N/A	N/A	N/A	N/A	2	29.03	10403	21210	32958	21643	16882	22058	10396	24765	10187	20535	32169
LGSFGSITR|S3: Phospho	161	gi|116805322|ref|NP_001449.3|; gi|188595687|ref|NP_001120959.1|	2	gamma filamin isoform a [Homo sapiens]; gamma filamin isoform b [Homo sapiens]	341775; 337979	341775	1	21	LGSFGSITR	S3: Phospho	S2233: Phospho	661.343	2	1320.67	-0.003553	21.22	1	2231	2239	R	Q	0	2012-08-10-Look-iTRAQ-pST-17p5-70.3872.3872.2.dta - 661.34310|2750|2069|1960|2190|1939|2081|24737|1606	742	['FLNC']	S2233: Phospho	FALSE	['NA']	FALSE	0	HCD	No	N/A	N/A	N/A	N/A	1	21.22	2750	2069	1960	2190	1939	2081	24737	1606	2750	2069	1960
KPSVPWQR|S3: Phospho	116	gi|130502162|ref|NP_075055.1|	1	RAS protein activator like 3 [Homo sapiens]	121867	121867	3	31	KPSVPWQR	S3: Phospho	S865: Phospho	562.647	3	1684.93	-0.008304	17.4	1	863	870	R	Q	0	2012-08-10-Look-iTRAQ-pST-15-70.3211.3211.3.dta - 562.64640|3841|3871|4268|3576|1296|3206|3470|3314	1451	['RASAL3']	S865: Phospho	FALSE	['NA']	FALSE	0.00273224	HCD	No	N/A	N/A	N/A	N/A	1	17.4	3841	3871	4268	3576	1296	3206	3470	3314	3841	3871	4268
AVAGVMITASHNR|S10: Phospho	28	gi|31377548|ref|NP_775853.2|	1	phosphoglucomutase 2-like 1 [Homo sapiens]	86880	86880	2	66	AVAGVMITASHNR	S10: Phospho	S175: Phospho	570.96	3	1709.86	9.2e-05	66.47	1	166	178	K	K	0	2012-08-10-Look-iTRAQ-pST-15-70.3116.3116.3.dta - 570.95970|856|656|988|1077|1068|904|1315|779	1491	['PGM2L1']	S175: Phospho	FALSE	['NA']	FALSE	0	HCD	Yes	Yes	Yes	26.6	39.87	1	66.47	856	656	988	1077	1068	904	1315	779	856	656	988
IPSFFPSPEEPPSPSAPSIAK|S3: Phospho	42	gi|21493029|ref|NP_009131.2|; gi|21493031|ref|NP_658913.1|; gi|31563330|ref|NP_006729.4|	3	A-kinase anchor protein 13 isoform 2 [Homo sapiens]; A-kinase anchor protein 13 isoform 3 [Homo sapiens]; A-kinase anchor protein 13 isoform 1 [Homo sapiens]	368789; 154369; 369141	368789	2	31	IPSFFPSPEEPPSPSAPSIAK	S3: Phospho	S2699: Phospho	718.376	4	2869.48	0.000286	25.55	1	2697	2717	R	S	0	2012-08-10-Look-iTRAQ-pST-20-230.3757.3757.4.dta - 718.37640|211|211|211|490|211|211|211|211	944	['AKAP13']	S2699: Phospho	FALSE	['NA']	FALSE	0	HCD	Yes	Yes	Yes	24.56	0.99	1	25.55	211	211	211	490	211	211	211	211	211	211	211
VPDSPSPAPSLEEGR|S6: Phospho	77	gi|259490226|ref|NP_542937.2|	1	dachshund homolog 1 isoform a [Homo sapiens]	84202	84202	1	39	VPDSPSPAPSLEEGR	S6: Phospho	S443: Phospho	641.311	3	1920.91	-0.003064	38.99	1	438	452	R	R	0	2012-08-10-Look-iTRAQ-pST-9-700.3319.3319.3.dta - 641.31020|203|203|2079|203|420|203|203|203	1397	['DACH1']	S443: Phospho	FALSE	['NA']	FALSE	0	HCD	Yes	Yes	Yes	29.82	9.17	1	38.99	203	203	2079	203	420	203	203	203	203	203	2079
RLSTHSPFR|S3: Phospho	131	gi|4758274|ref|NP_004428.1|; gi|260436831|ref|NP_001159477.1|; gi|260436834|ref|NP_001159478.1|; gi|260436837|ref|NP_001159479.1|; gi|42716289|ref|NP_976218.1|; gi|42716291|ref|NP_976217.1|	6	erythrocyte membrane protein band 4.1 (elliptocytosis 1, RH-linked) isoform 6 [Homo sapiens]; erythrocyte membrane protein band 4.1 (elliptocytosis 1, RH-linked) isoform 1 [Homo sapiens]; erythrocyte membrane protein band 4.1 (elliptocytosis 1, RH-linked) isoform 3 [Homo sapiens]; erythrocyte membrane protein band 4.1 (elliptocytosis 1, RH-linked) isoform 5 [Homo sapiens]; erythrocyte membrane pr…	84096; 122777; 103050; 84686; 109270; 90258	84096	1	29	RLSTHSPFR	S3: Phospho	S467: Phospho	495.593	3	1483.76	-0.002183	28.56	1	465	473	K	T	1	2012-08-10-Look-iTRAQ-pST-17p5-70.2268.2268.3.dta - 495.59370|2409|2030|2730|3202|3046|3835|2650|4225	870	['EPB41']	S467: Phospho	FALSE	['NA']	FALSE	0	HCD	No	N/A	N/A	N/A	N/A	2	30.34	3832	3911	4290	5684	5128	6034	5163	6744	2409	2030	2730
RNSLTGEEGQLAR|S3: Phospho	137	gi|13540569|ref|NP_110418.1|	1	sphingosine-1-phosphate phosphatase 1 [Homo sapiens]	53353	53353	1	26	RNSLTGEEGQLAR	S3: Phospho	S112: Phospho	605.638	3	1813.9	-0.00536	25.82	1	110	122	R	V	1	2012-08-10-Look-iTRAQ-pST-9-230.3432.3432.3.dta - 605.63870|212|212|526|212|564|598|1452|340	2186	['SGPP1']	S112: Phospho				0	HCD	No	N/A	N/A	N/A	N/A	1	25.82	212	212	526	212	564	598	1452	340	212	212	526
RHSDENDGGQPHK|S3: Phospho	98	gi|4505343|ref|NP_002477.1|	1	nuclear cap binding protein subunit 1, 80kDa [Homo sapiens]	107770	107770	1	31	RHSDENDGGQPHK	S3: Phospho	S7: Phospho	542.011	4	2164.03	-0.01115	32.98	1	5	17	R	R	1	2012-08-10-Look-iTRAQ-pST-0-700.1437.1437.4.dta - 542.01200|215|215|1630|215|547|983|587|450	2772	['NCBP1']	S7: Phospho				0	CID	Yes	Yes	Yes	26.41	6.57	1	32.98	215	215	1630	215	547	983	587	450	215	215	1630
AFVEDSEDEDGAGEGGSSLLQK|S6: Phospho	4	gi|145580615|ref|NP_075384.3|	1	KRI1 homolog [Homo sapiens]	105560	105560	1	57	AFVEDSEDEDGAGEGGSSLLQK	S6: Phospho	S177: Phospho	976.79	3	2927.35	-0.004398	57.08	1	172	193	R	R	0	2012-08-10-Look-iTRAQ-pST-20-700.3366.3366.3.dta - 976.79050|348|211|1400|211|211|211|211|211	700	['KRI1']	S177: Phospho	FALSE	['NA']	FALSE	0	CID	Yes	Yes	S17: Phospho	29.63	27.45	1	57.08	348	211	1400	211	211	211	211	211	348	211	1400
SSYSSPTSLSPR|Y3: Phospho; S10: Phospho	195	gi|21361888|ref|NP_067643.2|; gi|28866957|ref|NP_789847.1|; gi|38327612|ref|NP_932159.1|	3	PDZ and LIM domain 2 isoform 2 [Homo sapiens]; PDZ and LIM domain 2 isoform 1 [Homo sapiens]; PDZ and LIM domain 2 isoform 3 [Homo sapiens]	40877; 42902; 31027	40877	1	24	SSYSSPTSLSPR	Y3: Phospho; S10: Phospho	Y122: Phospho; S129: Phospho	866.877	2	1731.74	-0.002584	24.61	1	120	131	R	A	0	2012-08-10-Look-iTRAQ-pST-0-700.3039.3039.2.dta - 866.87720|705|2213|1372|1453|481|1434|1396|1093	1822	['PDLIM2']	Y122: Phospho; S129: Phospho				0	HCD	Yes	Yes	Y3: Phospho; T7: Phospho	21.81	2.8	1	24.61	705	2213	1372	1453	481	1434	1396	1093	705	2213	1372
SLPREESAGAAPGEGPEGVDGR|S1: Phospho	46	gi|95147333|ref|NP_004564.2|	1	phospholipase C, beta 2 [Homo sapiens]	164112	164112	2	38	SLPREESAGAAPGEGPEGVDGR	S1: Phospho	S958: Phospho	841.398	3	2521.18	-0.003825	37.58	1	958	979	R	V	1	2012-08-10-Look-iTRAQ-pST-9-700.3011.3011.3.dta - 841.39810|202|469|398|758|202|202|202|202	1884	['PLCB2']	S958: Phospho	FALSE	['NA']	FALSE	0	CID	Yes	Yes	Yes	24.82	12.76	1	37.58	202	469	398	758	202	202	202	202	202	469	398
RPQSPGASPSQAER|S4: Phospho	35	gi|14790190|ref|NP_055816.2|	1	spen homolog, transcriptional regulator [Homo sapiens]	482428	482428	1	54	RPQSPGASPSQAER	S4: Phospho	S736: Phospho	617.97	3	1850.89	-0.004615	53.97	1	733	746	R	L	0	2012-08-10-Look-iTRAQ-pST-9-230.1612.1612.3.dta - 617.97070|592|711|3794|585|1044|949|595|979	2264	['SPEN']	S736: Phospho				0	HCD	Yes	Yes	Yes	26.83	27.14	1	53.97	592	711	3794	585	1044	949	595	979	592	711	3794
VSPASPAGSPSADFAVHGESLGDR|S5: Phospho; S9: Phospho	132	gi|89353278|ref|NP_006634.3|; gi|89353281|ref|NP_001034796.1|; gi|89353283|ref|NP_001034797.1|	3	serologically defined colon cancer antigen 3 isoform 2 [Homo sapiens]; serologically defined colon cancer antigen 3 isoform 1 [Homo sapiens]; serologically defined colon cancer antigen 3 isoform 3 [Homo sapiens]	51663; 54966; 45928	51663	1	17	VSPASPAGSPSADFAVHGESLGDR	S5: Phospho; S9: Phospho	S220: Phospho; S224: Phospho	694.562	4	2774.23	-0.007606	16.7	1	216	239	R	H	0	2012-08-10-Look-iTRAQ-pST-11-700.3551.3551.4.dta - 694.56160|214|214|418|214|214|214|214|214	1586	['SDCCAG3']	S220: Phospho; S224: Phospho	FALSE	['NA']	FALSE	0	HCD	No	N/A	N/A	N/A	N/A	1	16.7	214	214	418	214	214	214	214	214	214	214	418
SVTLLEVCGSWPEGFGLR|S10: Phospho	3	gi|153218595|ref|NP_060149.3|; gi|153218631|ref|NP_001092902.1|	2	breast carcinoma amplified sequence 3 isoform 2 [Homo sapiens]; breast carcinoma amplified sequence 3 isoform 1 [Homo sapiens]	110245; 112218	110245	1	63	SVTLLEVCGSWPEGFGLR	S10: Phospho	S823: Phospho	797.727	3	2390.16	-0.004469	62.81	1	814	831	R	H	0	2012-08-10-Look-iTRAQ-pST-22p5-230.4503.4503.3.dta - 797.72680|215|454|1083|494|215|376|215|215	822	['BCAS3']	S823: Phospho	FALSE	['NA']	FALSE	0	HCD	Yes	Yes	Yes	39.8	23.01	1	62.81	215	454	1083	494	215	376	215	215	215	454	1083
TLSVAAAFNEDEDSEPEEMPPEAK|S14: Phospho; M19: Oxidation	8	gi|9966827|ref|NP_065090.1|	1	PEST proteolytic signal containing nuclear protein [Homo sapiens]	25910	25910	4	44	TLSVAAAFNEDEDSEPEEMPPEAK	S14: Phospho; M19: Oxidation	S119: Phospho; M124: Oxidation	828.38	4	3309.51	-0.017258	43.82	1	106	129	K	M	0	2012-08-10-Look-iTRAQ-pST-22p5-700.3751.3751.4.dta - 828.38010|214|214|417|214|214|214|214|214	1043	['PCNP']	S119: Phospho	FALSE	['NA']	FALSE	0	CID	Yes	Yes	Yes	24.51	19.31	3	43.82	214	214	417	214	214	214	214	214	214	214	417
RRSFSISPVR|S3: Phospho; S5: Phospho; S7: Phospho	230	gi|21040314|ref|NP_115571.1|; gi|21040326|ref|NP_620305.1|	2	SON DNA-binding protein isoform B [Homo sapiens]; SON DNA-binding protein isoform F [Homo sapiens]	282267; 298742	282267	1	9	RRSFSISPVR	S3: Phospho; S5: Phospho; S7: Phospho	S2009: Phospho; S2011: Phospho; S2013: Phospho	583.602	3	1747.79	-0.002997	9.13	1	2007	2016	R	L	2	2012-08-10-Look-iTRAQ-pST-9-700.3053.3053.3.dta - 583.60250|648|484|1119|621|431|469|395|539	1014	['SON']	S2009: Phospho; S2011: Phospho; S2013: Phospho	FALSE	['NA']	FALSE	0.00282486	HCD	No	N/A	N/A	N/A	N/A	1	9.13	648	484	1119	621	431	469	395	539	648	484	1119
AGKYVDEENSDGETSNHR|S10: Phospho	229	gi|145580615|ref|NP_075384.3|	1	KRI1 homolog [Homo sapiens]	105560	105560	1	19	AGKYVDEENSDGETSNHR	S10: Phospho	S142: Phospho	674.815	4	2695.23	-0.002316	19.92	1	133	150	K	L	1	2012-08-10-Look-iTRAQ-pST-0-700.2681.2681.4.dta - 674.81510|207|207|985|207|207|563|207|345	3044	['KRI1']	S142: Phospho				0.00194553	HCD	No	N/A	N/A	N/A	N/A	1	19.92	207	207	985	207	207	563	207	345	207	207	985
LCDDGPQLPTSPR|S11: Phospho	29	gi|65301112|ref|NP_001018003.1|; gi|155030230|ref|NP_005766.3|	2	sorbin and SH3 domain containing 3 isoform 2 [Homo sapiens]; sorbin and SH3 domain containing 3 isoform 1 [Homo sapiens]	41454; 84345	41454	1	51	LCDDGPQLPTSPR	S11: Phospho	S188: Phospho	613.958	3	1838.85	-0.001593	51.13	1	178	190	R	L	0	2012-08-10-Look-iTRAQ-pST-11-700.3254.3254.3.dta - 613.95760|209|209|942|209|209|779|594|209	915	['SORBS3']	S188: Phospho	FALSE	['NA']	FALSE	0	HCD	Yes	Yes	Yes	32.66	18.47	1	51.13	209	209	942	209	209	779	594	209	209	209	942
QESCSPHHPQVLAQQGSGSSPK|S20: Phospho	141	gi|24308227|ref|NP_065883.1|	1	zinc finger protein 687 [Homo sapiens]	151976	151976	1	24	QESCSPHHPQVLAQQGSGSSPK	S20: Phospho	S242: Phospho	759.368	4	3033.46	-0.015932	23.69	1	223	244	K	A	0	2012-08-10-Look-iTRAQ-pST-15-230.1890.1890.4.dta - 759.36880|197|197|380|197|197|197|197|197	1900	['ZNF687']	S242: Phospho	FALSE	['NA']	FALSE	0	HCD	Yes	Yes	Yes	17.69	6	1	23.69	197	197	380	197	197	197	197	197	197	197	380
SSSHSSPGSPK|S5: Phospho; S9: Phospho	177	gi|38044290|ref|NP_060082.2|	1	zinc finger, CCHC domain containing 8 [Homo sapiens]	93453	93453	1	18	SSSHSSPGSPK	S5: Phospho; S9: Phospho	S423: Phospho; S427: Phospho	609.281	3	1824.83	-0.007113	18.19	1	419	429	R	K	0	2012-08-10-Look-iTRAQ-pST-9-700.1374.1374.3.dta - 609.28110|456|708|1899|1641|937|1814|692|996	1128	['ZCCHC8']	S423: Phospho; S427: Phospho	FALSE	['NA']	FALSE	0	HCD	No	N/A	N/A	N/A	N/A	2	18.58	663	1093	2583	1848	1488	2460	899	1328	456	708	1899
STTPPPAEPVSLPQEPPKPR|T3: Phospho	62	gi|45359846|ref|NP_987100.1|	1	Ras-GTPase activating protein SH3 domain-binding protein 2 isoform b [Homo sapiens]	57231	57231	3	33	STTPPPAEPVSLPQEPPKPR	T3: Phospho	T227: Phospho	938.503	3	2812.5	-0.010868	31.18	1	225	244	K	V	0	2012-08-10-Look-iTRAQ-pST-13-230.3593.3593.3.dta - 938.50420|203|203|203|203|203|203|443|203	2196	['G3BP2']	T227: Phospho	FALSE	['NA']	FALSE	0	CID	No	N/A	N/A	N/A	N/A	2	31.18	203	203	203	203	203	203	443	203	203	203	203
FTSGAFLSPSVSVQECRTPR|T18: Phospho	79	gi|21264365|ref|NP_057404.2|; gi|56549645|ref|NP_624358.2|	2	nucleoporin 98kD isoform 1 [Homo sapiens]; nucleoporin 98kD isoform 4 [Homo sapiens]	222998; 214327	222998	1	34	FTSGAFLSPSVSVQECRTPR	T18: Phospho	T1053: Phospho	870.76	3	2609.26	-0.004685	34.38	1	1036	1055	K	A	1	2012-08-10-Look-iTRAQ-pST-20-30.3852.3852.3.dta - 870.76060|963|3256|3557|1048|524|1752|1353|2026	1523	['NUP98']	T1053: Phospho	FALSE	['NA']	FALSE	0	HCD	No	N/A	N/A	N/A	N/A	1	34.38	963	3256	3557	1048	524	1752	1353	2026	963	3256	3557
SVIEPLPVTPTR|T9: Phospho	19	gi|42794769|ref|NP_002567.3|; gi|190886457|ref|NP_001122092.1|	2	p21-activated kinase 1 isoform 2 [Homo sapiens]; p21-activated kinase 1 isoform 1 [Homo sapiens]	75496; 75738	75496	6	74	SVIEPLPVTPTR	T9: Phospho	T212: Phospho	564.979	3	1691.92	-0.000838	31.05	1	204	215	R	D	0	2012-08-10-Look-iTRAQ-pST-13-230.4205.4205.3.dta - 564.97950|351|580|515|1576|1132|2122|1710|1090	1284	['PAK1']	T212: Phospho	TRUE	['sp|Q13153|PAK1_HUMAN Serine/threonine-protein kinase PAK 1 OS=Homo sapiens GN=PAK1 PE=1 SV=2']	TRUE	0	HCD	No	N/A	N/A	N/A	N/A	1	31.05	351	580	515	1576	1132	2122	1710	1090	351	580	515
SLSGSSPCPK|S6: Phospho	1	gi|118572613|ref|NP_057417.3|	1	splicing coactivator subunit SRm300 [Homo sapiens]	340030	340030	41	565	SLSGSSPCPK	S6: Phospho	S783: Phospho	569.954	3	1706.85	-0.011704	23.47	1	778	787	R	Q	0	2012-08-10-Look-iTRAQ-pST-11-230.2368.2368.3.dta - 569.95460|707|829|1671|609|450|819|598|818	1809	['SRRM2']	S783: Phospho	FALSE	['NA']	FALSE	0.0077821	HCD	No	N/A	N/A	N/A	N/A	1	23.47	707	829	1671	609	450	819	598	818	707	829	1671
EAPGSPPLSPR|S5: Phospho; S9: Phospho	75	gi|32698936|ref|NP_872363.1|	1	B-cell CLL/lymphoma 9-like [Homo sapiens]	170203	170203	2	52	EAPGSPPLSPR	S5: Phospho; S9: Phospho	S21: Phospho; S25: Phospho	786.363	2	1570.71	0.001641	42.31	1	17	27	R	G	0	2012-08-10-Look-iTRAQ-pST-0-700.3058.3058.2.dta - 786.36310|2897|1618|5914|4666|3933|7522|2551|4667	1418	['BCL9L']	S21: Phospho; S25: Phospho				0	HCD	No	N/A	N/A	N/A	N/A	1	42.31	2897	1618	5914	4666	3933	7522	2551	4667	2897	1618	5914
YYGGGSEGGR|S6: Phospho	109	gi|52632383|ref|NP_001524.2|	1	heterogeneous nuclear ribonucleoprotein L isoform a [Homo sapiens]	73846	73846	1	13	YYGGGSEGGR	S6: Phospho	S52: Phospho	693.801	2	1385.59	-0.003701	13.27	1	47	56	R	A	0	2012-08-10-Look-iTRAQ-pST-13-700.1811.1811.2.dta - 693.80230|1200|2789|5161|2273|2895|3381|2311|2362	390	['HNRNPL']	S52: Phospho	FALSE	['NA']	FALSE	0.00549451	HCD	No	N/A	N/A	N/A	N/A	1	13.27	1200	2789	5161	2273	2895	3381	2311	2362	1200	2789	5161
LESTSPKGGPPPPPPPPPR|S5: Phospho	107	gi|21361272|ref|NP_005925.2|	1	myeloid/lymphoid or mixed-lineage leukemia (trithorax homolog, Drosophila); translocated to, 1 [Homo sapiens]	80669	80669	2	24	LESTSPKGGPPPPPPPPPR	S5: Phospho	S267: Phospho	649.103	4	2592.39	-0.009383	23.98	1	263	281	K	A	1	2012-08-10-Look-iTRAQ-pST-13-230.2892.2892.4.dta - 649.10380|207|207|388|207|207|207|207|207	2093	['MLLT1']	S267: Phospho	FALSE	['NA']	FALSE	0	CID	Yes	Yes	Yes	12.9	11.08	2	23.98	207	207	388	207	207	207	207	207	207	207	388
RISLDQQ|S3: Phospho	186	gi|58331195|ref|NP_056251.2|; gi|58331199|ref|NP_001009922.1|	2	ring finger and CHY zinc finger domain containing 1 isoform 1 [Homo sapiens]; ring finger and CHY zinc finger domain containing 1 isoform 3 [Homo sapiens]	36307; 34819	36307	2	18	RISLDQQ	S3: Phospho	S257: Phospho	622.319	2	1242.63	-0.003966	17.55	1	255	261	R	-	1	2012-08-10-Look-iTRAQ-pST-9-230.3428.3428.2.dta - 622.31930|1377|1930|2828|2518|1845|3721|1581|2800	893	['RCHY1']	S257: Phospho				0.00775194	HCD	No	N/A	N/A	N/A	N/A	2	17.82	2090	3188	4579	4130	2449	5576	2258	4163	1377	1930	2828
LQKQPLTSPGSVSPSR|S11: Phospho	50	gi|166706875|ref|NP_001969.2|; gi|166706877|ref|NP_001107607.1|; gi|166706879|ref|NP_001107608.1|; gi|166706881|ref|NP_001107609.1|; gi|166706883|ref|NP_001107610.1|	5	erythrocyte membrane protein band 4.9 isoform 1 [Homo sapiens]; erythrocyte membrane protein band 4.9 isoform 2 [Homo sapiens]; erythrocyte membrane protein band 4.9 isoform 2 [Homo sapiens]	54726; 51940; 51940	54726	2	38	LQKQPLTSPGSVSPSR	S11: Phospho	S14: Phospho	593.33	4	2369.29	-0.000107	37.51	1	4	19	R	D	1	2012-08-10-Look-iTRAQ-pST-15-70.2919.2919.4.dta - 593.32950|399|203|203|623|203|858|646|596	2030	['EPB49']	S14: Phospho	FALSE	['NA']	FALSE	0	CID	Yes	Yes	S13: Phospho	27.17	10.34	1	37.51	399	203	203	623	203	858	646	596	399	203	203
EGNTTEDDFPSSPGNGNK|S12: Phospho	263	gi|21361159|ref|NP_004897.2|	1	Wilms' tumour 1-associating protein isoform 1 [Homo sapiens]	52297	52297	1	14	EGNTTEDDFPSSPGNGNK	S12: Phospho	S306: Phospho	852.051	3	2553.15	-0.015806	13.5	1	295	312	R	S	0	2012-08-10-Look-iTRAQ-pST-0-700.3442.3442.3.dta - 852.05140|205|205|427|334|205|360|205|205	3008	['WTAP']	S306: Phospho				0.00293255	HCD	No	N/A	N/A	N/A	N/A	1	13.5	205	205	427	334	205	360	205	205	205	205	427
SAPASPTHPGLMSPR|S1: Phospho; S5: Phospho; M12: Oxidation	36	gi|82546824|ref|NP_001032242.1|	1	forkhead box K1 [Homo sapiens]	82255	82255	3	53	SAPASPTHPGLMSPR	S1: Phospho; S5: Phospho; M12: Oxidation	S416: Phospho; S420: Phospho; M427: Oxidation	662.633	3	1984.88	-0.002673	22.48	1	416	430	R	S	0	2012-08-10-Look-iTRAQ-pST-9-230.3099.3099.3.dta - 662.63280|209|209|1101|555|496|416|209|209	2518	['FOXK1']	S416: Phospho; S420: Phospho				0	HCD	No	N/A	N/A	N/A	N/A	1	22.48	209	209	1101	555	496	416	209	209	209	209	1101
YHGHSMSDPGVSYRTR|S5: Phospho; M6: Oxidation; S12: Phospho	6	gi|4505685|ref|NP_000275.1|; gi|4885543|ref|NP_005381.1|	2	pyruvate dehydrogenase E1 alpha 1 precursor [Homo sapiens]; pyruvate dehydrogenase E1 alpha 2 precursor [Homo sapiens]	51253; 50948	51253	19	74	YHGHSMSDPGVSYRTR	S5: Phospho; M6: Oxidation; S12: Phospho	S293: Phospho; M294: Oxidation; S300: Phospho	583.248	4	2328.97	-0.004029	14.19	1	289	304	R	E	1	2012-08-10-Look-iTRAQ-pST-13-700.1944.1944.4.dta - 583.24840|835|210|954|416|210|347|210|518	1178	['PDHA1', 'PDHA2']	S293: Phospho; S300: Phospho	FALSE	['NA']	FALSE	0	HCD	No	N/A	N/A	N/A	N/A	3	20.4	1387	624	1958	955	624	999	624	1198	835	210	954
AESPEEVACR|S3: Phospho	11	gi|61676188|ref|NP_113584.3|	1	HECT, UBA and WWE domain containing 1 [Homo sapiens]	543931	543931	5	100	AESPEEVACR	S3: Phospho	S1395: Phospho	766.34	2	1530.67	-0.004741	37.91	1	1393	1402	R	K	0	2012-08-10-Look-iTRAQ-pST-0-700.2640.2640.2.dta - 766.33950|978|1778|2834|1823|1981|2094|2049|1251	1369	['HUWE1']	S1395: Phospho				0	HCD	No	N/A	N/A	N/A	N/A	1	37.91	978	1778	2834	1823	1981	2094	2049	1251	978	1778	2834
ATASPRPSSGNIPSSPTASGGGSPTSPR|S23: Phospho	55	gi|49472835|ref|NP_057377.2|	1	bridging integrator 2 [Homo sapiens]	75089	75089	2	34	ATASPRPSSGNIPSSPTASGGGSPTSPR	S23: Phospho	S444: Phospho	989.145	3	2964.42	-0.011298	19.96	1	422	449	R	A	0	2012-08-10-Look-iTRAQ-pST-13-230.2313.2313.3.dta - 989.14610|210|210|210|437|210|210|210|210	2240	['BIN2']	S444: Phospho	FALSE	['NA']	FALSE	0.00537634	CID	No	N/A	N/A	N/A	N/A	2	34.2	210	210	210	437	210	210	210	210	210	210	210
YFEADPPGQVAASPDPTT|S13: Phospho	14	gi|5454002|ref|NP_006434.1|	1	putative c-Myc-responsive isoform 1 [Homo sapiens]	19819	19819	4	55	YFEADPPGQVAASPDPTT	S13: Phospho	S169: Phospho	1124.01	2	2246.01	0.001995	28.28	1	157	174	R	-	0	2012-08-10-Look-iTRAQ-pST-11-700.3826.3826.2.dta - 1124.01140|213|213|514|731|689|539|213|820	1321	['C6orf108']	S169: Phospho	FALSE	['NA']	FALSE	0	CID	No	N/A	N/A	N/A	N/A	3	56.73	792	713	1735	1259	1115	1433	639	1246	213	213	514
APSLTNDEVEEFR|T5: Phospho	109	gi|13514831|ref|NP_004389.2|	1	DEAD (Asp-Glu-Ala-Asp) box polypeptide 10 [Homo sapiens]	132197	132197	1	42	APSLTNDEVEEFR	T5: Phospho	T541: Phospho	630.964	3	1889.87	-0.001528	41.91	1	537	549	R	A	0	2012-08-10-Look-iTRAQ-pST-0-700.5448.5448.3.dta - 630.96440|217|217|217|442|217|217|217|217	2280	['DDX10']	T541: Phospho				0	HCD	Yes	Yes	S3: Phospho	31.17	10.74	1	41.91	217	217	217	442	217	217	217	217	217	217	217
SGKNSQEDSEDSEDKDVK|S9: Phospho	48	gi|56118310|ref|NP_073568.2|	1	nuclear casein kinase and cyclin-dependent kinase substrate 1 [Homo sapiens]	39144	39144	2	12	SGKNSQEDSEDSEDKDVK	S9: Phospho	S58: Phospho	659.529	5	3292.64	-0.03074	11.32	1	50	67	R	T	2	2012-08-10-Look-iTRAQ-pST-20-700.2181.2181.5.dta - 659.52950|206|402|1640|1167|728|1163|403|351	791	['NUCKS1']	S58: Phospho	FALSE	['NA']	FALSE	0	HCD	No	N/A	N/A	N/A	N/A	2	12.09	414	1330	2925	1784	1336	2350	829	1026	206	402	1640
AFSTEK|S3: Phospho	144	gi|8923712|ref|NP_060947.1|	1	uncharacterized hypothalamus protein HARP11 [Homo sapiens]	54757	54757	1	18	AFSTEK	S3: Phospho	S414: Phospho	457.575	3	1369.71	-0.008686	17.54	1	412	417	R	-	0	2012-08-10-Look-iTRAQ-pST-9-700.2702.2702.3.dta - 457.57470|210|1138|1534|890|1032|2686|928|1590	539	['ACTR10']	S414: Phospho	FALSE	['NA']	FALSE	0.00497512	CID	Yes	Yes	Yes	14.05	3.49	1	17.54	210	1138	1534	890	1032	2686	928	1590	210	1138	1534
RASEELDGLFR|S3: Phospho	6	gi|5174545|ref|NP_005911.1|	1	myocyte enhancer factor 2D [Homo sapiens]	62216	62216	2	105	RASEELDGLFR	S3: Phospho	S121: Phospho	559.616	3	1675.82	0.003057	66.95	1	119	129	R	R	1	2012-08-10-Look-iTRAQ-pST-15-70.5083.5083.3.dta - 559.61670|1707|2351|1402|6828|1279|2915|3133|1519	1439	['MEF2D']	S121: Phospho	FALSE	['NA']	FALSE	0	HCD	No	N/A	N/A	N/A	N/A	2	66.95	1913	2557	1608	7370	1485	3121	3339	1725	1707	2351	1402
SSPNPFITGLTR|S2: Phospho	88	gi|237757310|ref|NP_003886.3|; gi|237757326|ref|NP_001153778.1|	2	synaptojanin 1 isoform a [Homo sapiens]; synaptojanin 1 isoform d [Homo sapiens]	205824; 195051	205824	2	41	SSPNPFITGLTR	S2: Phospho	S1431: Phospho	558.623	3	1672.85	-0.001486	40.79	1	1430	1441	R	T	0	2012-08-10-Look-iTRAQ-pST-17p5-70.4318.4318.3.dta - 558.62350|2374|7755|9338|6301|6260|12694|5477|9841	1089	['SYNJ1']	S1431: Phospho	FALSE	['NA']	FALSE	0	HCD	Yes	Yes	Yes	32.7	8.09	2	40.79	4045	14744	16983	11140	11280	23811	10214	18435	2374	7755	9338
SPSPPDGSPAATPEIR|S8: Phospho	119	gi|4757748|ref|NP_004296.1|; gi|21536400|ref|NP_647593.1|; gi|21536402|ref|NP_647594.1|; gi|21536404|ref|NP_647595.1|; gi|21536407|ref|NP_647596.1|; gi|21536409|ref|NP_647597.1|; gi|21536411|ref|NP_647598.1|; gi|21536413|ref|NP_647599.1|; gi|21536415|ref|NP_647600.1|; gi|21536417|ref|NP_647601.1|	10	bridging integrator 1 isoform 8 [Homo sapiens]; bridging integrator 1 isoform 1 [Homo sapiens]; bridging integrator 1 isoform 2 [Homo sapiens]; bridging integrator 1 isoform 3 [Homo sapiens]; bridging integrator 1 isoform 4 [Homo sapiens]; bridging integrator 1 isoform 5 [Homo sapiens]; bridging integrator 1 isoform 6 [Homo sapiens]; bridging integrator 1 isoform 7 [Homo sapiens]; bridging integr…	63406; 78577; 72600; 67537; 69383; 69412; 65935; 63436; 59959; 57266	63406	1	30	SPSPPDGSPAATPEIR	S8: Phospho	S287: Phospho	654.983	3	1961.94	-0.014514	29.55	1	280	295	K	V	0	2012-08-10-Look-iTRAQ-pST-11-230.3519.3519.3.dta - 654.98300|323|427|207|544|207|207|887|207	2243	['BIN1']	S287: Phospho	FALSE	['NA']	FALSE	0.00512821	HCD	No	N/A	N/A	N/A	N/A	1	29.55	323	427	207	544	207	207	887	207	323	427	207
SPGSPVGEGTGSPPKWQIGEQEFEALMR|S4: Phospho	52	gi|29826319|ref|NP_001110.2|; gi|29826321|ref|NP_054908.2|; gi|29826323|ref|NP_054909.2|; gi|29826325|ref|NP_789771.1|	4	adducin 1 (alpha) isoform a [Homo sapiens]; adducin 1 (alpha) isoform b [Homo sapiens]; adducin 1 (alpha) isoform c [Homo sapiens]; adducin 1 (alpha) isoform d [Homo sapiens]	97427; 101248; 82566; 86387	97427	2	27	SPGSPVGEGTGSPPKWQIGEQEFEALMR	S4: Phospho	S358: Phospho	915.705	4	3658.8	-0.004836	26.8	1	355	382	R	M	1	2012-08-10-Look-iTRAQ-pST-20-230.4537.4537.4.dta - 915.70600|212|459|212|463|643|508|1055|915	1083	['ADD1']	S358: Phospho	FALSE	['NA']	FALSE	0	HCD	No	N/A	N/A	N/A	N/A	2	26.8	212	459	212	463	643	508	1055	915	212	459	212
SSLSSNDDGYENIDSLTR|S5: Phospho; Y10: Phospho	234	gi|21687149|ref|NP_660321.1|	1	hypothetical protein LOC148823 [Homo sapiens]	19277	19277	1	8	SSLSSNDDGYENIDSLTR	S5: Phospho; Y10: Phospho	S84: Phospho; Y89: Phospho	813.007	3	2436	-0.003696	8.48	1	80	97	R	K	0	2012-08-10-Look-iTRAQ-pST-9-700.4568.4568.3.dta - 813.00740|214|214|383|214|214|214|214|214	1843	['C1orf150']	S84: Phospho; Y89: Phospho	FALSE	['NA']	FALSE	0.00273224	HCD	No	N/A	N/A	N/A	N/A	1	8.48	214	214	383	214	214	214	214	214	214	214	383
DNTFFRESPVGR|S8: Phospho	165	gi|41872339|ref|NP_958846.1|; gi|219842244|ref|NP_001137259.1|; gi|219842247|ref|NP_001137260.1|; gi|219842250|ref|NP_001137261.1|; gi|41872344|ref|NP_958847.1|; gi|41872349|ref|NP_958848.1|; gi|41872368|ref|NP_958923.1|; gi|48255929|ref|NP_057572.5|	8	periphilin 1 isoform 5 [Homo sapiens]; periphilin 1 isoform 6 [Homo sapiens]; periphilin 1 isoform 7 [Homo sapiens]; periphilin 1 isoform 8 [Homo sapiens]; periphilin 1 isoform 3 [Homo sapiens]; periphilin 1 isoform 4 [Homo sapiens]; periphilin 1 isoform 2 [Homo sapiens]; periphilin 1 isoform 1 [Homo sapiens]	35242; 58561; 47101; 40052; 49865; 43737; 50786; 61945	35242	2	19	DNTFFRESPVGR	S8: Phospho	S85: Phospho	603.625	3	1807.86	-0.004318	18.98	1	78	89	R	K	1	2012-08-10-Look-iTRAQ-pST-13-230.3607.3607.3.dta - 603.62520|1041|1333|2218|917|211|793|770|1149	1470	['PPHLN1']	S85: Phospho	FALSE	['NA']	FALSE	0	HCD	No	N/A	N/A	N/A	N/A	2	18.98	1763	1984	3356	1125	419	1318	1134	1540	1041	1333	2218
HVTLPSSPR|T3: Phospho; S7: Phospho	114	gi|82659109|ref|NP_065816.2|	1	retinoblastoma-associated factor 600 [Homo sapiens]	668462	668462	1	30	HVTLPSSPR	T3: Phospho; S7: Phospho	T2715: Phospho; S2719: Phospho	486.566	3	1456.68	-0.002367	29.8	1	2713	2721	R	S	0	2012-08-10-Look-iTRAQ-pST-9-230.3725.3725.3.dta - 486.56610|482|563|806|450|383|1257|1363|629	1406	['UBR4']	T2715: Phospho; S2719: Phospho				0	HCD	No	N/A	N/A	N/A	N/A	1	29.8	482	563	806	450	383	1257	1363	629	482	563	806
VVLGAHNLSR|S9: Phospho	18	gi|4503549|ref|NP_001963.1|	1	neutrophil elastase preproprotein [Homo sapiens]	29431	29431	3	80	VVLGAHNLSR	S9: Phospho	S90: Phospho	483.933	3	1448.78	-0.003274	34.29	1	82	91	R	R	0	2012-08-10-Look-iTRAQ-pST-15-70.2854.2854.3.dta - 483.93230|207|207|207|383|451|580|207|4586	1136	['ELANE']	S90: Phospho	FALSE	['NA']	FALSE	0	HCD	No	N/A	N/A	N/A	N/A	1	34.29	207	207	207	383	451	580	207	4586	207	207	207
GDVEGSQSQDEGEGSGESER|S8: Phospho	21	gi|4885399|ref|NP_005436.1|	1	structural maintenance of chromosomes 3 [Homo sapiens]	180487	180487	5	56	GDVEGSQSQDEGEGSGESER	S8: Phospho	S1067: Phospho	808.331	3	2421.97	0.000265	48.1	1	1060	1079	K	G	0	2012-08-10-Look-iTRAQ-pST-13-700.1853.1853.3.dta - 808.33210|206|206|652|470|400|632|206|206	1216	['SMC3']	S1067: Phospho	FALSE	['NA']	FALSE	0	HCD	Yes	Yes	Yes	30.72	17.38	8	65.3	1040	1245	1854	1614	1234	1466	1168	1124	206	206	652
SSPPAPPLPPGSGSPGTPQALPR|S2: Phospho	56	gi|85815829|ref|NP_061830.3|	1	SH3-domain binding protein 1 [Homo sapiens]	85438	85438	10	36	SSPPAPPLPPGSGSPGTPQALPR	S2: Phospho	S586: Phospho	850.439	3	2548.3	-0.004295	32.1	1	585	607	R	R	0	2012-08-10-Look-iTRAQ-pST-15-70.4183.4183.3.dta - 850.43890|215|215|379|215|215|215|215|215	2106	['SH3BP1']	S586: Phospho	FALSE	['NA']	FALSE	0	CID	No	N/A	N/A	N/A	N/A	6	35.87	215	215	379	215	215	215	215	215	215	215	379
DGVSLGAVSSTEEASR|S4: Phospho; S9: Phospho	36	gi|254910960|ref|NP_001157196.1|	1	hypothetical protein LOC388588 [Homo sapiens]	10436	10436	4	48	DGVSLGAVSSTEEASR	S4: Phospho; S9: Phospho	S22: Phospho; S27: Phospho	1014.94	2	2027.88	-0.004993	23.24	1	19	34	R	C	0	2012-08-10-Look-iTRAQ-pST-0-700.4412.4412.2.dta - 1014.94260|211|211|211|211|211|211|415|211	2622	['LOC388588']	S22: Phospho; S27: Phospho				0	CID	No	N/A	N/A	N/A	N/A	1	23.24	211	211	211	211	211	211	415	211	211	211	211
SLDGAAAVDSADR|S1: Phospho	58	gi|4758274|ref|NP_004428.1|; gi|260436831|ref|NP_001159477.1|; gi|260436834|ref|NP_001159478.1|; gi|260436837|ref|NP_001159479.1|; gi|42716289|ref|NP_976218.1|; gi|42716291|ref|NP_976217.1|	6	erythrocyte membrane protein band 4.1 (elliptocytosis 1, RH-linked) isoform 6 [Homo sapiens]; erythrocyte membrane protein band 4.1 (elliptocytosis 1, RH-linked) isoform 1 [Homo sapiens]; erythrocyte membrane protein band 4.1 (elliptocytosis 1, RH-linked) isoform 3 [Homo sapiens]; erythrocyte membrane protein band 4.1 (elliptocytosis 1, RH-linked) isoform 5 [Homo sapiens]; erythrocyte membrane pr…	84096; 122777; 103050; 84686; 109270; 90258	84096	4	59	SLDGAAAVDSADR	S1: Phospho	S333: Phospho	816.38	2	1630.75	-0.004178	42.14	1	333	345	R	S	0	2012-08-10-Look-iTRAQ-pST-0-700.3455.3455.2.dta - 816.38050|367|886|436|1136|1004|1038|9173|1367	1578	['EPB41']	S333: Phospho				0	HCD	Yes	Yes	Yes	31.83	10.31	4	58.86	1095	2084	1736	2007	3806	3126	11855	2295	367	886	436
LFQLGPPSPVK|S8: Phospho	48	gi|4758980|ref|NP_004210.1|; gi|154354976|ref|NP_006598.2|	2	pituitary tumor-transforming protein 1 [Homo sapiens]; pituitary tumor-transforming 2 [Homo sapiens]	28513; 27592	28513	1	32	LFQLGPPSPVK	S8: Phospho	S165: Phospho	624.36	3	1870.06	-0.00032	32.25	1	158	168	K	M	0	2012-08-10-Look-iTRAQ-pST-20-70.3823.3823.3.dta - 624.36160|644|219|219|769|219|219|219|685	894	['PTTG1', 'PTTG2']	S165: Phospho	FALSE	['NA']	FALSE	0	HCD	No	N/A	N/A	N/A	N/A	1	32.25	644	219	219	769	219	219	219	685	644	219	219
GPGSPPRTPPAPGPPSFEEQLR|S4: Phospho; T8: Phospho	77	gi|46409340|ref|NP_997237.1|	1	ankyrin repeat domain 13 family, member D [Homo sapiens]	63560	63560	2	39	GPGSPPRTPPAPGPPSFEEQLR	S4: Phospho; T8: Phospho	S465: Phospho; T469: Phospho	912.434	3	2734.28	-0.001577	12.62	1	462	483	R	L	1	2012-08-10-Look-iTRAQ-pST-13-230.4428.4428.3.dta - 912.43490|440|1290|878|1341|857|1490|745|1902	2178	['unresolved: gi|46409340|ref|NP_997237.1|']	S465: Phospho; T469: Phospho	FALSE	['NA']	FALSE	0.00265252	HCD	No	N/A	N/A	N/A	N/A	2	38.83	646	1496	1084	1774	1063	2024	951	2371	440	1290	878
AATAARPPAPPPAPQPPSPTPSPPRPTLAR|S18: Phospho; S22: Phospho	80	gi|148806884|ref|NP_001092103.1|; gi|148806896|ref|NP_115751.2|; gi|148806906|ref|NP_001092102.1|	3	AKT1 substrate 1 (proline-rich) [Homo sapiens]	29724	29724	2	26	AATAARPPAPPPAPQPPSPTPSPPRPTLAR	S18: Phospho; S22: Phospho	S88: Phospho; S92: Phospho	857.943	4	3427.75	-0.003394	20.2	1	71	100	R	E	0	2012-08-10-Look-iTRAQ-pST-15-70.3415.3415.4.dta - 857.94250|201|201|201|387|201|201|201|201	2274	['AKT1S1']	S88: Phospho; S92: Phospho	FALSE	['NA']	FALSE	0	CID	No	N/A	N/A	N/A	N/A	2	26	201	201	201	387	201	201	201	201	201	201	201
HGLLLPASPVR|S8: Phospho	14	gi|49472830|ref|NP_612206.3|	1	hypothetical protein LOC116224 [Homo sapiens]	34141	34141	3	90	HGLLLPASPVR	S8: Phospho	S76: Phospho	515.293	3	1542.86	-0.002542	49.03	1	69	79	R	M	0	2012-08-10-Look-iTRAQ-pST-17p5-70.3098.3098.3.dta - 515.29280|289|596|664|392|209|324|544|209	925	['FAM122A']	S76: Phospho	FALSE	['NA']	FALSE	0	HCD	Yes	Yes	Yes	30.59	18.44	1	49.03	289	596	664	392	209	324	544	209	289	596	664
ALSGSATLVSSPK|S5: Phospho	70	gi|54792740|ref|NP_055673.2|	1	transmembrane and coiled-coil domain family 2 [Homo sapiens]	90159	90159	1	46	ALSGSATLVSSPK	S5: Phospho	S464: Phospho	636.02	3	1905.04	-0.006018	46.08	1	460	472	R	Y	0	2012-08-10-Look-iTRAQ-pST-17p5-70.2959.2959.3.dta - 636.01920|605|698|391|1827|552|1251|540|2618	1364	['TMCC2']	S464: Phospho	FALSE	['NA']	FALSE	0	HCD	Yes	Yes	T7: Phospho	27.26	18.82	1	46.08	605	698	391	1827	552	1251	540	2618	605	698	391
NDSVIVADQTPTPTR|T12: Phospho	53	gi|22538422|ref|NP_001871.2|	1	activating transcription factor 2 [Homo sapiens]	63915	63915	1	47	NDSVIVADQTPTPTR	T12: Phospho	T71: Phospho	666.664	3	1996.98	-0.007574	47.03	1	60	74	R	F	0	2012-08-10-Look-iTRAQ-pST-9-230.3939.3939.3.dta - 666.66410|211|211|368|211|211|211|211|211	2549	['ATF2']	T71: Phospho				0	HCD	Yes	Yes	Yes	38.82	8.21	1	47.03	211	211	368	211	211	211	211	211	211	211	368
RPPSPDVIVLSDNEQPSSPR|S4: Phospho; S18: Phospho	107	gi|164519146|ref|NP_060130.3|	1	GATA zinc finger domain containing 2A [Homo sapiens]	80227	80227	1	23	RPPSPDVIVLSDNEQPSSPR	S4: Phospho; S18: Phospho	S100: Phospho; S114: Phospho	664.319	4	2653.25	5e-06	22.98	1	97	116	R	V	0	2012-08-10-Look-iTRAQ-pST-11-700.3520.3520.4.dta - 664.31860|207|207|207|207|207|207|207|381	1503	['GATAD2A']	S100: Phospho; S114: Phospho	FALSE	['NA']	FALSE	0	HCD	Yes	Yes	Yes	20.52	2.46	1	22.98	207	207	207	207	207	207	207	381	207	207	207
SLELQTR|S1: Phospho	196	gi|134133248|ref|NP_001077005.1|; gi|134133265|ref|NP_149077.2|	2	FYVE, RhoGEF and PH domain containing 3 [Homo sapiens]	94200	94200	1	17	SLELQTR	S1: Phospho	S446: Phospho	615.821	2	1229.63	-0.004511	16.55	1	446	452	R	T	0	2012-08-10-Look-iTRAQ-pST-9-230.3592.3592.2.dta - 615.82140|746|1021|5944|1216|2542|2841|1577|1304	847	['FGD3']	S446: Phospho				0.00726392	HCD	No	N/A	N/A	N/A	N/A	1	16.55	746	1021	5944	1216	2542	2841	1577	1304	746	1021	5944
DAVQSLQLSPR|S9: Phospho	34	gi|130502162|ref|NP_075055.1|	1	RAS protein activator like 3 [Homo sapiens]	121867	121867	2	44	DAVQSLQLSPR	S9: Phospho	S988: Phospho	533.277	3	1596.82	-0.008715	43.61	1	980	990	R	T	0	2012-08-10-Look-iTRAQ-pST-13-230.3601.3601.3.dta - 533.27760|203|203|351|203|203|203|203|203	1101	['RASAL3']	S988: Phospho	FALSE	['NA']	FALSE	0	CID	Yes	Yes	Yes	42.23	1.38	1	43.61	203	203	351	203	203	203	203	203	203	203	351
KSPENTEGK|S2: Phospho	160	gi|20270186|ref|NP_004233.1|; gi|23238231|ref|NP_620058.1|	2	high mobility group nucleosomal binding domain 3 isoform HMGN3a [Homo sapiens]; high mobility group nucleosomal binding domain 3 isoform HMGN3b [Homo sapiens]	16744; 13848	16744	1	21	KSPENTEGK	S2: Phospho	S6: Phospho	496.271	4	1981.06	-0.01043	20.68	1	5	13	R	D	1	2012-08-10-Look-iTRAQ-pST-9-700.1899.1899.4.dta - 496.27110|366|356|2417|1152|1778|1891|1068|473	1488	['HMGN3']	S6: Phospho	FALSE	['NA']	FALSE	0	HCD	No	N/A	N/A	N/A	N/A	1	20.68	366	356	2417	1152	1778	1891	1068	473	366	356	2417
DFDIAEQNESSDEESLR|S11: Phospho	24	gi|21361912|ref|NP_071760.2|	1	DnaJ (Hsp40) homolog, subfamily C, member 1 precursor [Homo sapiens]	80613	80613	1	38	DFDIAEQNESSDEESLR	S11: Phospho	S480: Phospho	790.007	3	2367.01	-0.005126	38.27	1	470	486	K	K	0	2012-08-10-Look-iTRAQ-pST-17p5-700.3071.3071.3.dta - 790.00830|213|213|365|213|213|213|213|213	601	['DNAJC1']	S480: Phospho	FALSE	['NA']	FALSE	0	HCD	Yes	Yes	Yes	36.4	1.87	1	38.27	213	213	365	213	213	213	213	213	213	213	365
GSPVSEIGWETPPPESPR|T11: Phospho; S16: Phospho	78	gi|11321640|ref|NP_066301.1|	1	basic beta 1 syntrophin [Homo sapiens]	68710	68710	1	39	GSPVSEIGWETPPPESPR	T11: Phospho; S16: Phospho	T214: Phospho; S219: Phospho	796.027	3	2385.06	-0.001331	38.75	1	204	221	K	L	0	2012-08-10-Look-iTRAQ-pST-9-700.4579.4579.3.dta - 796.02670|211|211|361|211|211|211|211|211	1815	['SNTB1']	T214: Phospho; S219: Phospho	FALSE	['NA']	FALSE	0	HCD	Yes	Yes	Yes	30.65	8.1	1	38.75	211	211	361	211	211	211	211	211	211	211	361
RASQEANLLTLAQK|S3: Phospho	58	gi|44890062|ref|NP_919254.2|; gi|112807226|ref|NP_001036783.1|	2	hypothetical protein LOC91748 [Homo sapiens]	133988	133988	2	32	RASQEANLLTLAQK	S3: Phospho	S461: Phospho	558.564	4	2230.23	-0.001257	15.61	1	459	472	R	A	1	2012-08-10-Look-iTRAQ-pST-15-230.3618.3618.4.dta - 558.56290|214|214|366|214|214|214|214|214	1605	['C14orf43']	S461: Phospho	FALSE	['NA']	FALSE	0.00892857	CID	No	N/A	N/A	N/A	N/A	1	15.61	214	214	366	214	214	214	214	214	214	214	366
MSGFIYQGK|S2: Phospho	155	gi|4505573|ref|NP_003890.1|; gi|166064034|ref|NP_001106983.1|; gi|166064036|ref|NP_001106984.1|; gi|166064038|ref|NP_001106985.1|; gi|22027525|ref|NP_004831.1|; gi|22027528|ref|NP_663788.1|	6	PAK-interacting exchange factor beta isoform a [Homo sapiens]; PAK-interacting exchange factor beta isoform c [Homo sapiens]; PAK-interacting exchange factor beta isoform d [Homo sapiens]; Rac/Cdc42 guanine nucleotide exchange factor 6 [Homo sapiens]; PAK-interacting exchange factor beta isoform b [Homo sapiens]	90700; 106686; 101040; 105733; 104446	90700	1	20	MSGFIYQGK	S2: Phospho	S340: Phospho	573.629	3	1717.87	-0.006289	20.91	1	339	347	R	L	0	2012-08-10-Look-iTRAQ-pST-15-230.3850.3850.3.dta - 573.62860|955|2660|2060|2362|2599|2505|1960|2457	939	['ARHGEF7', 'ARHGEF6']	S340: Phospho	FALSE	['NA']	FALSE	0	HCD	Yes	Yes	Yes	15.6	5.31	3	25.93	3076	6598	5757	6720	5943	7425	6030	6244	955	2660	2060
AASPPASASDLIEQQQKR|S3: Phospho	47	gi|56790935|ref|NP_149079.2|	1	hypothetical protein LOC85369 [Homo sapiens]	112683	112683	1	49	AASPPASASDLIEQQQKR	S3: Phospho	S335: Phospho	647.091	4	2584.35	-0.011451	49.37	1	333	350	R	G	1	2012-08-10-Look-iTRAQ-pST-13-230.3539.3539.4.dta - 647.09190|206|206|352|206|206|206|206|206	2084	['FAM40A']	S335: Phospho	FALSE	['NA']	FALSE	0	HCD	No	N/A	N/A	N/A	N/A	1	49.37	206	206	352	206	206	206	206	206	206	206	352
RASDTSLTQGIVAFR|S3: Phospho	26	gi|38569460|ref|NP_056006.1|	1	SNF1-like kinase 2 [Homo sapiens]	115352	115352	1	67	RASDTSLTQGIVAFR	S3: Phospho	S587: Phospho	669.35	3	2005.03	-0.001723	68.16	1	585	599	R	Q	1	2012-08-10-Look-iTRAQ-pST-17p5-70.3969.3969.3.dta - 669.35010|436|748|615|903|316|728|831|365	1469	['SIK2']	S587: Phospho	TRUE	['sp|Q9H0K1|SIK2_HUMAN Serine/threonine-protein kinase SIK2 OS=Homo sapiens GN=SIK2 PE=1 SV=1']	TRUE	0	HCD	Yes	Yes	Yes	47.02	21.14	1	68.16	436	748	615	903	316	728	831	365	436	748	615
VVELRPPSR|S8: Phospho	171	gi|221139764|ref|NP_065952.2|	1	PHD and ring finger domains 1 [Homo sapiens]	205734	205734	2	23	VVELRPPSR	S8: Phospho	S990: Phospho	479.603	3	1435.79	0.00057	22.95	1	983	991	R	S	0	2012-08-10-Look-iTRAQ-pST-15-70.3178.3178.3.dta - 479.60210|2523|2188|3983|2374|2752|2929|2638|2922	1116	['PHRF1']	S990: Phospho	FALSE	['NA']	FALSE	0.00340136	HCD	No	N/A	N/A	N/A	N/A	1	22.95	2523	2188	3983	2374	2752	2929	2638	2922	2523	2188	3983
ETEDEEAEADRTSR|S13: Phospho	217	gi|119220598|ref|NP_061160.2|	1	apolipoprotein B48 receptor [Homo sapiens]	122866	122866	1	11	ETEDEEAEADRTSR	S13: Phospho	S727: Phospho	674.624	3	2020.85	-0.002358	10.75	1	715	728	R	R	1	2012-08-10-Look-iTRAQ-pST-9-700.1702.1702.3.dta - 674.62440|1332|3431|5269|2934|3189|3008|1020|8113	1528	['APOB48R']	S727: Phospho	FALSE	['NA']	FALSE	0.00293255	HCD	No	N/A	N/A	N/A	N/A	1	10.75	1332	3431	5269	2934	3189	3008	1020	8113	1332	3431	5269
KGSDDAPYSPTAR|S3: Phospho	64	gi|117190342|ref|NP_005383.3|	1	PHD finger protein 2 [Homo sapiens]	159391	159391	1	28	KGSDDAPYSPTAR	S3: Phospho	S899: Phospho	514.009	4	2052.01	-0.006424	29.85	1	897	909	R	V	1	2012-08-10-Look-iTRAQ-pST-11-700.2161.2161.4.dta - 514.00920|211|211|351|211|332|211|360|211	1152	['PHF2']	S899: Phospho	FALSE	['NA']	FALSE	0	CID	Yes	Yes	Yes	22.06	7.79	1	29.85	211	211	351	211	332	211	360	211	211	211	351
SSGSETEQVVDFSDRETK|T6: Phospho	53	gi|5901962|ref|NP_008998.1|	1	MYST histone acetyltransferase 2 [Homo sapiens]	85884	85884	1	34	SSGSETEQVVDFSDRETK	T6: Phospho	T104: Phospho	673.074	4	2688.27	-0.008373	34.37	1	99	116	R	N	1	2012-08-10-Look-iTRAQ-pST-9-700.3624.3624.4.dta - 673.07260|205|205|1095|205|205|410|205|205	1982	['MYST2']	T104: Phospho	FALSE	['NA']	FALSE	0	CID	Yes	Yes	S4: Phospho	33.78	0.59	1	34.37	205	205	1095	205	205	410	205	205	205	205	1095
SECDSSPEPK|S6: Phospho	1	gi|118572613|ref|NP_057417.3|	1	splicing coactivator subunit SRm300 [Homo sapiens]	340030	340030	37	433	SECDSSPEPK	S6: Phospho	S1483: Phospho	608.614	3	1822.83	-0.006478	16.2	1	1478	1487	R	A	0	2012-08-10-Look-iTRAQ-pST-0-700.1971.1971.3.dta - 608.61410|500|1001|4194|913|590|1579|527|711	2130	['SRRM2']	S1483: Phospho				0.00334448	HCD	No	N/A	N/A	N/A	N/A	1	16.2	500	1001	4194	913	590	1579	527	711	500	1001	4194
GEPNVSYICSR|S6: Phospho	75	gi|21361340|ref|NP_002084.2|; gi|225903437|ref|NP_001139628.1|; gi|49574532|ref|NP_063937.2|	3	glycogen synthase kinase 3 beta isoform 1 [Homo sapiens]; glycogen synthase kinase 3 beta isoform 2 [Homo sapiens]; glycogen synthase kinase 3 alpha [Homo sapiens]	55818; 54529; 58402	55818	2	28	GEPNVSYICSR	S6: Phospho	S215: Phospho	833.38	2	1664.75	-0.008213	29.7	1	210	220	R	Y	0	2012-08-10-Look-iTRAQ-pST-11-230.3475.3475.2.dta - 833.38060|964|1618|1954|2022|1398|2359|1304|1626	1682	['GSK3B', 'GSK3A']	S215: Phospho	TRUE	['sp|P49841|GSK3B_HUMAN Glycogen synthase kinase-3 beta OS=Homo sapiens GN=GSK3B PE=1 SV=2', 'sp|P49840|GSK3A_HUMAN Glycogen synthase kinase-3 alpha OS=Homo sapiens GN=GSK3A PE=1 SV=2']	FALSE	0	CID	No	N/A	N/A	N/A	N/A	1	29.7	964	1618	1954	2022	1398	2359	1304	1626	964	1618	1954
AEGVSTPLAGR|T6: Phospho	7	gi|67089149|ref|NP_150241.2|; gi|169217946|ref|XP_001716158.1|	2	promyelocytic leukemia protein isoform 1 [Homo sapiens]; PREDICTED: similar to PML protein [Homo sapiens]	108573; 36863	108573	7	104	AEGVSTPLAGR	T6: Phospho	T867: Phospho	721.37	2	1440.73	-0.002895	26.64	1	862	872	R	G	0	2012-08-10-Look-iTRAQ-pST-9-230.3357.3357.2.dta - 721.37010|1509|889|684|1519|1279|1910|761|6016	1368	['PML', 'LOC652346']	T867: Phospho				0	HCD	No	N/A	N/A	N/A	N/A	2	55.24	1715	1447	1632	2609	2778	2906	1476	8847	1509	889	684
GILAADESTGSIAK|T9: Phospho	39	sp|ALDOA_RABIT|; gi|193794814|ref|NP_001121089.1|; gi|34577110|ref|NP_908930.1|; gi|34577112|ref|NP_908932.1|; gi|4557305|ref|NP_000025.1|	5	Marto_Lab (cRAP); fructose-bisphosphate aldolase A [Homo sapiens]; fructose-bisphosphate aldolase A [Homo sapiens]; fructose-bisphosphate aldolase A [Homo sapiens]; fructose-bisphosphate aldolase A [Homo sapiens]	47503; 48065; 48065; 48065; 48065	47503	2	40	GILAADESTGSIAK	T9: Phospho	T37: Phospho	674.363	3	2020.07	-0.00377	33.11	1	29	42	K	R	0	2012-08-10-Look-iTRAQ-pST-13-700.3128.3128.3.dta - 674.36250|483|595|404|589|577|217|834|451	918	['NA', 'ALDOA']	T37: Phospho	FALSE	['NA']	FALSE	0	HCD	No	N/A	N/A	N/A	N/A	1	33.11	483	595	404	589	577	217	834	451	483	595	404
GGSGSGPTIEEVD|S3: Phospho	67	gi|167466173|ref|NP_005337.2|; gi|194248072|ref|NP_005336.3|	2	heat shock 70kDa protein 1B [Homo sapiens]; heat shock 70kDa protein 1A [Homo sapiens]	85809	85809	3	36	GGSGSGPTIEEVD	S3: Phospho	S631: Phospho	794.855	2	1587.7	-0.001972	31.08	1	629	641	K	-	0	2012-08-10-Look-iTRAQ-pST-0-700.3760.3760.2.dta - 794.85490|202|202|202|202|202|202|371|202	1462	['HSPA1B', 'HSPA1A']	S631: Phospho				0	CID	Yes	Yes	Yes	11.59	19.49	1	31.08	202	202	202	202	202	202	371	202	202	202	202
SSSLPAYGR|S2: Phospho	8	gi|166706875|ref|NP_001969.2|; gi|166706877|ref|NP_001107607.1|; gi|166706879|ref|NP_001107608.1|; gi|166706881|ref|NP_001107609.1|; gi|166706883|ref|NP_001107610.1|; gi|166706885|ref|NP_001107611.1|	6	erythrocyte membrane protein band 4.9 isoform 1 [Homo sapiens]; erythrocyte membrane protein band 4.9 isoform 2 [Homo sapiens]; erythrocyte membrane protein band 4.9 isoform 2 [Homo sapiens]; erythrocyte membrane protein band 4.9 isoform 3 [Homo sapiens]	54726; 51940; 51940; 49534	54726	4	79	SSSLPAYGR	S2: Phospho	S288: Phospho	441.216	3	1320.64	-0.010571	27.02	1	287	295	K	T	0	2012-08-10-Look-iTRAQ-pST-11-230.2805.2805.3.dta - 441.21680|398|500|212|650|784|574|2109|1058	977	['EPB49']	S288: Phospho	FALSE	['NA']	FALSE	0.00452489	HCD	No	N/A	N/A	N/A	N/A	1	27.02	398	500	212	650	784	574	2109	1058	398	500	212
GNAEGSSDEEGKLVIDEPAK|S6: Phospho; S7: Phospho	18	gi|4758516|ref|NP_004485.1|; gi|186928819|ref|NP_001119522.1|; gi|186928821|ref|NP_001119523.1|	3	hepatoma-derived growth factor isoform a [Homo sapiens]; hepatoma-derived growth factor isoform b [Homo sapiens]; hepatoma-derived growth factor isoform c [Homo sapiens]	35404; 36517; 32937	35404	9	38	GNAEGSSDEEGKLVIDEPAK	S6: Phospho; S7: Phospho	S132: Phospho; S133: Phospho	780.132	4	3116.51	-0.010426	19.26	1	127	146	K	E	1	2012-08-10-Look-iTRAQ-pST-22p5-700.5156.5156.4.dta - 780.13310|208|208|617|208|445|208|451|208	997	['HDGF']	S132: Phospho; S133: Phospho	FALSE	['NA']	FALSE	0	HCD	No	N/A	N/A	N/A	N/A	3	19.26	427	427	1245	427	938	427	670	427	208	208	617
ALAMPGRPESPPVFR|S10: Phospho	208	gi|209969812|ref|NP_001129663.1|; gi|258613875|ref|NP_056308.3|	2	ankyrin repeat domain 25 isoform 2 [Homo sapiens]; ankyrin repeat domain 25 isoform 1 [Homo sapiens]	100434; 101180	100434	1	13	ALAMPGRPESPPVFR	S10: Phospho	S375: Phospho	670.35	3	2008.03	-0.000159	12.92	1	366	380	R	S	0	2012-08-10-Look-iTRAQ-pST-17p5-70.3904.3904.3.dta - 670.34990|1381|1344|2428|1394|1153|2555|2076|1384	1475	['KANK2']	S375: Phospho	FALSE	['NA']	FALSE	0.00555556	HCD	No	N/A	N/A	N/A	N/A	1	12.92	1381	1344	2428	1394	1153	2555	2076	1384	1381	1344	2428
STTPPPAEPVSLPQEPPK|T3: Phospho	83	gi|19923399|ref|NP_036429.2|; gi|45359849|ref|NP_987101.1|	2	Ras-GTPase activating protein SH3 domain-binding protein 2 isoform a [Homo sapiens]	61142	61142	1	28	STTPPPAEPVSLPQEPPK	T3: Phospho	T227: Phospho	640.842	4	2559.34	-0.006185	28.2	1	225	242	K	A	0	2012-08-10-Look-iTRAQ-pST-13-230.3803.3803.4.dta - 640.84260|203|203|337|203|203|203|203|203	2076	['G3BP2']	T227: Phospho	FALSE	['NA']	FALSE	0	CID	Yes	Yes	Yes	20.78	7.42	1	28.2	203	203	337	203	203	203	203	203	203	203	337
VQTTPPPAVQGQK|T4: Phospho	60	gi|148277037|ref|NP_055726.3|	1	AP2 associated kinase 1 [Homo sapiens]	119468	119468	1	31	VQTTPPPAVQGQK	T4: Phospho	T606: Phospho	680.374	3	2038.11	-0.007834	31.45	1	603	615	K	V	0	2012-08-10-Look-iTRAQ-pST-11-230.3018.3018.3.dta - 680.37430|213|213|1513|213|998|213|524|213	2382	['AAK1']	T606: Phospho	TRUE	['sp|Q2M2I8|AAK1_HUMAN AP2-associated protein kinase 1 OS=Homo sapiens GN=AAK1 PE=1 SV=3']	TRUE	0	CID	Yes	Yes	Yes	18.55	12.9	1	31.45	213	213	1513	213	998	213	524	213	213	213	1513
SPGSPVGEGTGSPPKWQIGEQEFEALMR|S4: Phospho; M27: Oxidation	11	gi|29826319|ref|NP_001110.2|; gi|29826321|ref|NP_054908.2|; gi|29826323|ref|NP_054909.2|; gi|29826325|ref|NP_789771.1|	4	adducin 1 (alpha) isoform a [Homo sapiens]; adducin 1 (alpha) isoform b [Homo sapiens]; adducin 1 (alpha) isoform c [Homo sapiens]; adducin 1 (alpha) isoform d [Homo sapiens]	97427; 101248; 82566; 86387	97427	6	48	SPGSPVGEGTGSPPKWQIGEQEFEALMR	S4: Phospho; M27: Oxidation	S358: Phospho; M381: Oxidation	919.703	4	3674.79	-0.006915	38.55	1	355	382	R	M	1	2012-08-10-Look-iTRAQ-pST-20-230.4294.4294.4.dta - 919.70390|214|827|214|528|214|1248|1814|1337	1086	['ADD1']	S358: Phospho	FALSE	['NA']	FALSE	0	CID	Yes	Yes	Yes	18.55	20	4	38.55	423	1294	423	920	607	1457	2408	1546	214	827	214
LGHPEALSAGTGSPQPPSFTYAQQR|S8: Phospho	18	gi|4508047|ref|NP_003452.1|; gi|58530845|ref|NP_001010972.1|	2	zyxin [Homo sapiens]	70649	70649	2	66	LGHPEALSAGTGSPQPPSFTYAQQR	S8: Phospho	S303: Phospho	994.486	3	2980.44	-0.003718	67.13	1	296	320	K	E	0	2012-08-10-Look-iTRAQ-pST-17p5-230.3041.3041.3.dta - 994.48690|212|212|555|212|212|528|212|394	1238	['ZYX']	S303: Phospho	FALSE	['NA']	FALSE	0	HCD	Yes	Yes	S13: Phospho	44.78	22.35	2	67.13	212	212	555	212	212	528	212	394	212	212	555
NSFTPLSSSNTIR|S2: Phospho	170	gi|64762406|ref|NP_006203.2|	1	6-phosphofructo-2-kinase/fructose-2,6-biphosphatase 2 isoform a [Homo sapiens]	69600	69600	1	23	NSFTPLSSSNTIR	S2: Phospho	S466: Phospho	603.301	3	1806.88	-0.000921	23.07	1	465	477	R	R	0	2012-08-10-Look-iTRAQ-pST-15-70.3774.3774.3.dta - 603.30080|758|776|820|2315|1451|1066|977|985	1623	['PFKFB2']	S466: Phospho	FALSE	['NA']	FALSE	0.00341297	HCD	No	N/A	N/A	N/A	N/A	1	23.07	758	776	820	2315	1451	1066	977	985	758	776	820
EQLDQVPSR|S8: Phospho	283	gi|145309304|ref|NP_001398.2|	1	cadherin EGF LAG seven-pass G-type receptor 3 precursor [Homo sapiens]	376554	376554	1	11	EQLDQVPSR	S8: Phospho	S3209: Phospho	728.359	2	1454.71	-0.004858	10.72	1	3202	3210	R	H	0	2012-08-10-Look-iTRAQ-pST-0-700.3580.3580.2.dta - 728.35850|2948|1425|6398|6259|2088|2097|1343|1123	1179	['CELSR3']	S3209: Phospho				0.00539084	HCD	No	N/A	N/A	N/A	N/A	1	10.72	2948	1425	6398	6259	2088	2097	1343	1123	2948	1425	6398
SPGSPVGEGTGSPPKWQIGEQEFEALMR|S1: Phospho	24	gi|29826319|ref|NP_001110.2|; gi|29826321|ref|NP_054908.2|; gi|29826323|ref|NP_054909.2|; gi|29826325|ref|NP_789771.1|	4	adducin 1 (alpha) isoform a [Homo sapiens]; adducin 1 (alpha) isoform b [Homo sapiens]; adducin 1 (alpha) isoform c [Homo sapiens]; adducin 1 (alpha) isoform d [Homo sapiens]	97427; 101248; 82566; 86387	97427	2	33	SPGSPVGEGTGSPPKWQIGEQEFEALMR	S1: Phospho	S355: Phospho	915.707	4	3658.8	0.002244	21.3	1	355	382	R	M	1	2012-08-10-Look-iTRAQ-pST-20-700.4522.4522.4.dta - 915.70840|203|203|203|203|203|203|364|203	945	['ADD1']	S355: Phospho	FALSE	['NA']	FALSE	0	CID	No	N/A	N/A	N/A	N/A	1	21.3	203	203	203	203	203	203	364	203	203	203	203
SPAAPYFLGSSFSPVR|S13: Phospho	67	gi|4507917|ref|NP_003381.1|	1	WEE1 tyrosine kinase isoform 1 [Homo sapiens]	83188	83188	1	22	SPAAPYFLGSSFSPVR	S13: Phospho	S139: Phospho	689.679	3	2066.02	-0.00357	22.96	1	127	142	K	C	0	2012-08-10-Look-iTRAQ-pST-20-70.3959.3959.3.dta - 689.68010|218|218|357|218|218|218|218|218	1037	['WEE1']	S139: Phospho	TRUE	['sp|P30291|WEE1_HUMAN Wee1-like protein kinase OS=Homo sapiens GN=WEE1 PE=1 SV=2']	TRUE	0	HCD	No	N/A	N/A	N/A	N/A	1	22.96	218	218	357	218	218	218	218	218	218	218	357
GPSPAPASSPK|S3: Phospho; S9: Phospho	184	gi|226509740|ref|NP_067051.2|	1	SR-related CTD-associated factor 1 [Homo sapiens]	165367	165367	1	26	GPSPAPASSPK	S3: Phospho; S9: Phospho	S719: Phospho; S725: Phospho	588.622	3	1762.85	-0.008143	25.82	1	717	727	R	R	0	2012-08-10-Look-iTRAQ-pST-0-700.2138.2138.3.dta - 588.62180|672|1053|1665|1218|1143|1119|968|756	1907	['SCAF1']	S719: Phospho; S725: Phospho				0	HCD	No	N/A	N/A	N/A	N/A	1	25.82	672	1053	1665	1218	1143	1119	968	756	672	1053	1665
SPPRASYVAPLTAQPATYR|Y7: Phospho	4	gi|5454064|ref|NP_006319.1|	1	RNA binding motif protein 14 [Homo sapiens]	75704	75704	12	96	SPPRASYVAPLTAQPATYR	Y7: Phospho	Y226: Phospho	608.316	4	2429.24	-0.004898	31.96	1	220	238	R	A	1	2012-08-10-Look-iTRAQ-pST-15-70.3874.3874.4.dta - 608.31620|211|211|345|211|211|211|211|211	2062	['RBM14']	Y226: Phospho	FALSE	['NA']	FALSE	0	CID	Yes	Yes	S1: Phospho	19.83	12.13	1	31.96	211	211	345	211	211	211	211	211	211	211	345
RKGSGSEQEGEDEEGGER|S4: Phospho; S6: Phospho	32	gi|7661950|ref|NP_055448.1|	1	SH2 domain binding protein 1 [Homo sapiens]	167491	167491	4	30	RKGSGSEQEGEDEEGGER	S4: Phospho; S6: Phospho	S941: Phospho; S943: Phospho	676.793	4	2703.16	-0.019088	15.86	1	938	955	R	K	2	2012-08-10-Look-iTRAQ-pST-20-700.1943.1943.4.dta - 676.79460|391|568|791|689|476|791|676|479	632	['CTR9']	S941: Phospho; S943: Phospho	FALSE	['NA']	FALSE	0	HCD	No	N/A	N/A	N/A	N/A	4	35.89	1140	1531	1414	1444	1213	1537	2148	1252	391	568	791
LFPNATSPELLEDFR|S7: Phospho	8	gi|151301137|ref|NP_110394.3|	1	AT-hook transcription factor [Homo sapiens]	171053	171053	1	60	LFPNATSPELLEDFR	S7: Phospho	S52: Phospho	711.691	3	2132.05	0.002553	59.97	1	46	60	R	L	0	2012-08-10-Look-iTRAQ-pST-17p5-700.4396.4396.3.dta - 711.69270|803|1928|1382|2128|1002|1501|1441|1027	520	['AKNA']	S52: Phospho	FALSE	['NA']	FALSE	0	HCD	No	N/A	N/A	N/A	N/A	1	59.97	803	1928	1382	2128	1002	1501	1441	1027	803	1928	1382
RISLSDMPR|S3: Phospho	134	gi|34335262|ref|NP_898868.1|; gi|34335264|ref|NP_898869.1|; gi|34335266|ref|NP_036540.3|	3	zinc finger, MYND-type containing 8 isoform a [Homo sapiens]; zinc finger, MYND-type containing 8 isoform c [Homo sapiens]; zinc finger, MYND-type containing 8 isoform b [Homo sapiens]	167526; 160147; 163349	167526	1	29	RISLSDMPR	S3: Phospho	S445: Phospho	486.919	3	1457.74	-0.002544	28.95	1	443	451	R	S	1	2012-08-10-Look-iTRAQ-pST-15-70.3637.3637.3.dta - 486.91820|733|697|939|1267|1001|678|696|724	1144	['ZMYND8']	S445: Phospho	FALSE	['NA']	FALSE	0	HCD	No	N/A	N/A	N/A	N/A	1	28.95	733	697	939	1267	1001	678	696	724	733	697	939
TQLWASEPGTPPLPTSLPSQNPILK|T10: Phospho	78	gi|58331218|ref|NP_056992.4|; gi|192807332|ref|NP_001122324.1|; gi|192807334|ref|NP_001122325.1|; gi|192807336|ref|NP_001122326.1|	4	arsenate resistance protein 2 isoform a [Homo sapiens]; arsenate resistance protein 2 isoform c [Homo sapiens]; arsenate resistance protein 2 isoform d [Homo sapiens]; arsenate resistance protein 2 isoform e [Homo sapiens]	122355; 122226; 121965; 121836	122355	1	14	TQLWASEPGTPPLPTSLPSQNPILK	T10: Phospho	T544: Phospho	672.968	5	3359.8	0.005071	13.98	1	535	559	R	N	0	2012-08-10-Look-iTRAQ-pST-20-230.3848.3848.5.dta - 672.96960|209|209|209|209|209|209|209|353	1050	['SRRT']	T544: Phospho	FALSE	['NA']	FALSE	0	HCD	No	N/A	N/A	N/A	N/A	1	13.98	209	209	209	209	209	209	209	353	209	209	209
TAESQTPTPSATSFFSGK|T6: Phospho	40	gi|70166852|ref|NP_001102.2|; gi|70166944|ref|NP_056655.2|; gi|70167032|ref|NP_056656.2|; gi|70167113|ref|NP_001020278.1|	4	adenosine deaminase, RNA-specific isoform a [Homo sapiens]; adenosine deaminase, RNA-specific isoform b [Homo sapiens]; adenosine deaminase, RNA-specific isoform c [Homo sapiens]; adenosine deaminase, RNA-specific isoform d [Homo sapiens]	164458; 161363; 158956; 128141	164458	1	51	TAESQTPTPSATSFFSGK	T6: Phospho	T601: Phospho	844.748	3	2531.24	-0.018459	51.39	1	596	613	K	S	0	2012-08-10-Look-iTRAQ-pST-15-230.3708.3708.3.dta - 844.74580|214|468|543|699|643|214|402|214	1749	['ADAR']	T601: Phospho	FALSE	['NA']	FALSE	0	HCD	Yes	Yes	T8: Phospho	38.43	12.96	1	51.39	214	468	543	699	643	214	402	214	214	468	543
KPVTVSPTTPTSPTEGEAS|T8: Phospho	42	gi|166795297|ref|NP_057225.2|	1	dynein, cytoplasmic 1, light intermediate chain 1 [Homo sapiens]	69910	69910	2	37	KPVTVSPTTPTSPTEGEAS	T8: Phospho	T512: Phospho	644.333	4	2573.31	-0.0069	36.99	1	505	523	R	-	0	2012-08-10-Look-iTRAQ-pST-13-700.2571.2571.4.dta - 644.33260|216|216|216|375|216|216|216|216	1276	['DYNC1LI1']	T512: Phospho	FALSE	['NA']	FALSE	0	HCD	No	N/A	N/A	N/A	N/A	1	36.99	216	216	216	375	216	216	216	216	216	216	216
SETPPHWR|T3: Phospho	110	gi|42560244|ref|NP_004783.2|	1	peptidylprolyl isomerase G [Homo sapiens]	122236	122236	3	31	SETPPHWR	T3: Phospho	T358: Phospho	465.222	3	1392.65	-0.003907	29.79	1	356	363	R	Q	0	2012-08-10-Look-iTRAQ-pST-9-230.3789.3789.3.dta - 465.22260|683|1146|2067|1398|997|1724|1213|1236	1261	['PPIG']	T358: Phospho				0	HCD	No	N/A	N/A	N/A	N/A	2	30.5	1539	2386	3859	2118	1785	2701	2241	1627	683	1146	2067
VTIASLPR|T2: Phospho	43	gi|42789729|ref|NP_006143.2|	1	lymphoid-restricted membrane protein [Homo sapiens]	68555	68555	1	52	VTIASLPR	T2: Phospho	T319: Phospho	620.85	2	1239.69	-0.0031	52.2	1	318	325	R	N	0	2012-08-10-Look-iTRAQ-pST-13-230.4091.4091.2.dta - 620.85080|9540|15764|23571|11811|13584|20112|28087|9977	588	['LRMP']	T319: Phospho	FALSE	['NA']	FALSE	0	HCD	No	N/A	N/A	N/A	N/A	1	52.2	9540	15764	23571	11811	13584	20112	28087	9977	9540	15764	23571
DSENLASPSEYPENGER|S9: Phospho	197	gi|21264365|ref|NP_057404.2|; gi|21264369|ref|NP_624357.1|; gi|56549643|ref|NP_005378.4|; gi|56549645|ref|NP_624358.2|	4	nucleoporin 98kD isoform 1 [Homo sapiens]; nucleoporin 98kD isoform 2 [Homo sapiens]; nucleoporin 98kD isoform 3 [Homo sapiens]; nucleoporin 98kD isoform 4 [Homo sapiens]	222998; 111701; 113767; 214327	222998	1	23	DSENLASPSEYPENGER	S9: Phospho	S608: Phospho	759.997	3	2276.97	-0.005488	24.06	1	600	616	R	F	0	2012-08-10-Look-iTRAQ-pST-0-700.3666.3666.3.dta - 759.99680|211|211|339|211|211|211|211|211	2859	['NUP98']	S608: Phospho				0	HCD	Yes	Yes	S7: Phospho	18.47	5.59	1	24.06	211	211	339	211	211	211	211	211	211	211	339
RYSDPPTYCLPPASGQTNG|S3: Phospho	33	gi|33356170|ref|NP_004136.2|	1	myosin IXB isoform 1 [Homo sapiens]	296257	296257	2	44	RYSDPPTYCLPPASGQTNG	S3: Phospho	S2141: Phospho	822.369	3	2464.1	-0.018511	25.08	1	2139	2157	R	-	1	2012-08-10-Look-iTRAQ-pST-13-230.3668.3668.3.dta - 822.36990|207|207|332|207|207|207|207|207	2029	['MYO9B']	S2141: Phospho	FALSE	['NA']	FALSE	0	CID	No	N/A	N/A	N/A	N/A	1	25.08	207	207	332	207	207	207	207	207	207	207	332
LSSQISAGEEKWNSVSPASAGK|S6: Phospho	76	gi|223555917|ref|NP_848927.2|	1	metadherin [Homo sapiens]	86063	86063	1	23	LSSQISAGEEKWNSVSPASAGK	S6: Phospho	S298: Phospho	807.178	4	3224.68	-0.0006	23.37	1	293	314	K	R	1	2012-08-10-Look-iTRAQ-pST-17p5-230.3560.3560.4.dta - 807.17740|206|206|206|468|380|206|327|206	1265	['MTDH']	S298: Phospho	FALSE	['NA']	FALSE	0	CID	Yes	Yes	S14: Phospho	20.96	2.41	1	23.37	206	206	206	468	380	206	327	206	206	206	206
LHVSTINLQK|S4: Phospho	158	gi|4826730|ref|NP_004949.1|	1	FK506 binding protein 12-rapamycin associated protein 1 [Homo sapiens]	330610	330610	1	8	LHVSTINLQK	S4: Phospho	S1261: Phospho	614.354	3	1840.04	-0.002577	8.03	1	1258	1267	K	A	0	2012-08-10-Look-iTRAQ-pST-17p5-230.3021.3021.3.dta - 614.35460|210|210|210|210|210|210|362|210	724	['MTOR']	S1261: Phospho	TRUE	['sp|P42345|MTOR_HUMAN Serine/threonine-protein kinase mTOR OS=Homo sapiens GN=MTOR PE=1 SV=1']	TRUE	0.0037037	HCD	No	N/A	N/A	N/A	N/A	1	8.03	210	210	210	210	210	210	362	210	210	210	210
LTQSWSSQSSFNSLQR|S6: Phospho	81	gi|4885219|ref|NP_005229.1|; gi|219689118|ref|NP_001137292.1|; gi|241666446|ref|NP_001155894.1|	3	v-ets erythroblastosis virus E26 oncogene homolog 1 isoform 2 [Homo sapiens]; v-ets erythroblastosis virus E26 oncogene homolog 1 isoform 1 [Homo sapiens]; v-ets erythroblastosis virus E26 oncogene homolog 1 isoform 3 [Homo sapiens]	60928; 64883; 32544	60928	1	43	LTQSWSSQSSFNSLQR	S6: Phospho	S269: Phospho	747.356	3	2239.06	-0.011237	42.97	1	264	279	R	V	0	2012-08-10-Look-iTRAQ-pST-17p5-70.4103.4103.3.dta - 747.35610|210|975|973|1395|620|1088|1665|210	1593	['ETS1']	S269: Phospho	FALSE	['NA']	FALSE	0	HCD	No	N/A	N/A	N/A	N/A	1	42.97	210	975	973	1395	620	1088	1665	210	210	975	973
LVGATATSSPPPKAR|S9: Phospho	8	gi|42716295|ref|NP_115664.2|	1	forty-two-three domain containing 1 isoform 1 [Homo sapiens]	44675	44675	3	96	LVGATATSSPPPKAR	S9: Phospho	S16: Phospho	714.4	3	2140.19	-0.007679	31.53	1	8	22	R	S	1	2012-08-10-Look-iTRAQ-pST-15-70.2535.2535.3.dta - 714.40110|1148|643|2152|979|617|1325|764|780	1956	['FYTTD1']	S16: Phospho	FALSE	['NA']	FALSE	0	HCD	Yes	Yes	Yes	24.44	7.09	1	31.53	1148	643	2152	979	617	1325	764	780	1148	643	2152
ASSHSSQTQGGGSVTK|T8: Phospho; S13: Phospho	71	gi|5031875|ref|NP_005563.1|; gi|27436946|ref|NP_733821.1|; gi|27436948|ref|NP_733822.1|	3	lamin A/C isoform 2 [Homo sapiens]; lamin A/C isoform 1 precursor [Homo sapiens]; lamin A/C isoform 3 [Homo sapiens]	77321; 86852; 83071	77321	1	12	ASSHSSQTQGGGSVTK	T8: Phospho; S13: Phospho	T409: Phospho; S414: Phospho	572.52	4	2286.05	-2.4e-05	12.27	1	402	417	R	K	0	2012-08-10-Look-iTRAQ-pST-15-700.1530.1530.4.dta - 572.52030|205|205|326|205|205|205|205|205	694	['LMNA']	T409: Phospho; S414: Phospho	FALSE	['NA']	FALSE	0.00806452	HCD	No	N/A	N/A	N/A	N/A	1	12.27	205	205	326	205	205	205	205	205	205	205	326
HSSPHQSEDEEDPR|S3: Phospho; S7: Phospho	52	gi|31542868|ref|NP_002094.2|; gi|239049591|ref|NP_001155059.1|	2	glycogen synthase 1 (muscle) isoform 1 [Homo sapiens]; glycogen synthase 1 (muscle) isoform 2 [Homo sapiens]	93657; 85998	93657	1	13	HSSPHQSEDEEDPR	S3: Phospho; S7: Phospho	S653: Phospho; S657: Phospho	705.275	3	2112.81	-0.004909	12.63	1	651	664	R	N	0	2012-08-10-Look-iTRAQ-pST-17p5-700.1241.1241.3.dta - 705.27610|210|210|851|210|210|722|210|638	509	['GYS1']	S653: Phospho; S657: Phospho	FALSE	['NA']	FALSE	0	HCD	No	N/A	N/A	N/A	N/A	5	15.77	828	828	1707	828	1091	1553	828	1646	210	210	851
GFGDGYNGYGGGPGGGNFGGSPGYGGGR|S21: Phospho	62	gi|4504447|ref|NP_002128.1|; gi|14043072|ref|NP_112533.1|	2	heterogeneous nuclear ribonucleoprotein A2/B1 isoform A2 [Homo sapiens]; heterogeneous nuclear ribonucleoprotein A2/B1 isoform B1 [Homo sapiens]	41212; 43548	41212	2	49	GFGDGYNGYGGGPGGGNFGGSPGYGGGR	S21: Phospho	S247: Phospho	960.407	3	2878.2	-0.005648	37.31	1	227	254	R	G	0	2012-08-10-Look-iTRAQ-pST-17p5-70.3622.3622.3.dta - 960.40640|205|205|205|347|205|205|205|205	1798	['HNRNPA2B1']	S247: Phospho	FALSE	['NA']	FALSE	0	HCD	No	N/A	N/A	N/A	N/A	2	52.27	205	205	205	347	205	205	205	205	205	205	205
VLSSTSEEDEPGVVK|S3: Phospho; S6: Phospho	154	gi|170932524|ref|NP_861447.3|; gi|170932526|ref|NP_001116314.1|	2	nuclear receptor coactivator 7 isoform 1 [Homo sapiens]; nuclear receptor coactivator 7 isoform 2 [Homo sapiens]	135318; 133947	135318	2	22	VLSSTSEEDEPGVVK	S3: Phospho; S6: Phospho	S208: Phospho; S211: Phospho	782.039	3	2343.11	-0.015984	21.76	1	206	220	R	F	0	2012-08-10-Look-iTRAQ-pST-9-700.3929.3929.3.dta - 782.03930|201|338|201|201|201|285|558|351	1790	['NCOA7']	S208: Phospho; S211: Phospho	FALSE	['NA']	FALSE	0	HCD	No	N/A	N/A	N/A	N/A	1	21.76	201	338	201	201	201	285	558	351	201	338	201
QASPTEVVER|S3: Phospho	169	gi|13491168|ref|NP_056132.1|	1	pumilio homolog 2 [Homo sapiens]	126367	126367	3	28	QASPTEVVER	S3: Phospho	S182: Phospho	750.374	2	1498.73	-0.000273	22.34	1	180	189	R	L	0	2012-08-10-Look-iTRAQ-pST-0-700.2886.2886.2.dta - 750.37390|1405|2490|3452|2341|3025|3272|2148|2351	1266	['PUM2']	S182: Phospho				0.00220751	HCD	No	N/A	N/A	N/A	N/A	3	28.39	3146	4726	7816	5248	6388	6691	5319	4400	1405	2490	3452
AVSPPHLDGPPSPR|S3: Phospho; S12: Phospho	44	gi|4505903|ref|NP_002666.1|; gi|109637788|ref|NP_150247.2|; gi|15451765|ref|NP_150242.1|; gi|15451779|ref|NP_150252.1|; gi|239752618|ref|XP_001717440.2|; gi|67089149|ref|NP_150241.2|; gi|67089157|ref|NP_150243.2|; gi|67089160|ref|NP_150253.2|	8	promyelocytic leukemia protein isoform 6 [Homo sapiens]; promyelocytic leukemia protein isoform 5 [Homo sapiens]; promyelocytic leukemia protein isoform 9 [Homo sapiens]; promyelocytic leukemia protein isoform 10 [Homo sapiens]; PREDICTED: similar to promyelocytic leukemia protein [Homo sapiens]; promyelocytic leukemia protein isoform 1 [Homo sapiens]; promyelocytic leukemia protein isoform 2 [Ho…	78459; 70143; 99010; 72867; 18061; 108573; 75603; 93418	78459	2	52	AVSPPHLDGPPSPR	S3: Phospho; S12: Phospho	S518: Phospho; S527: Phospho	630.963	3	1889.87	-0.006064	51.7	1	516	529	K	S	0	2012-08-10-Look-iTRAQ-pST-13-230.3549.3549.3.dta - 630.96410|695|637|1254|423|403|916|583|924	1589	['PML', 'unresolved: gi|239752618|ref|XP_001717440.2|']	S518: Phospho; S527: Phospho	FALSE	['NA']	FALSE	0	HCD	No	N/A	N/A	N/A	N/A	4	57.16	1930	1549	2840	1912	2042	2779	1941	2476	695	637	1254
LLGSKSPGPGPGPGAGAEPGATGGSSHFISSR|S6: Phospho	57	gi|153792536|ref|NP_060022.1|	1	ATPase family, AAA domain containing 2B [Homo sapiens]	196467	196467	1	27	LLGSKSPGPGPGPGAGAEPGATGGSSHFISSR	S6: Phospho	S16: Phospho	716.567	5	3577.81	-0.016025	26.7	1	11	42	R	T	1	2012-08-10-Look-iTRAQ-pST-20-70.2575.2575.5.dta - 716.56780|200|200|315|200|200|200|200|200	1320	['ATAD2B']	S16: Phospho	FALSE	['NA']	FALSE	0	HCD	No	N/A	N/A	N/A	N/A	1	26.7	200	200	315	200	200	200	200	200	200	200	315
LTIFGNSAVSQPASSSNHSSR|S16: Phospho; S19: Phospho	38	gi|114520607|ref|NP_940682.2|; gi|114520609|ref|NP_006145.2|	2	neural precursor cell expressed, developmentally down-regulated 4 isoform 2 [Homo sapiens]; neural precursor cell expressed, developmentally down-regulated 4 isoform 1 [Homo sapiens]	161028; 119039	161028	1	33	LTIFGNSAVSQPASSSNHSSR	S16: Phospho; S19: Phospho	S667: Phospho; S670: Phospho	871.069	3	2610.18	0.007323	33.27	1	652	672	R	R	0	2012-08-10-Look-iTRAQ-pST-20-230.3162.3162.3.dta - 871.07070|215|571|215|582|215|664|657|508	835	['NEDD4']	S667: Phospho; S670: Phospho	FALSE	['NA']	FALSE	0	HCD	Yes	Yes	Yes	21.41	11.86	1	33.27	215	571	215	582	215	664	657	508	215	571	215
TTTPYFL|T3: Phospho	170	gi|4506029|ref|NP_002712.1|; gi|183603929|ref|NP_001116827.1|; gi|183603931|ref|NP_001116841.1|	3	protein phosphatase 6, catalytic subunit isoform b [Homo sapiens]; protein phosphatase 6, catalytic subunit isoform a [Homo sapiens]; protein phosphatase 6, catalytic subunit isoform c [Homo sapiens]	40673; 44891; 38006	40673	1	15	TTTPYFL	T3: Phospho	T301: Phospho	613.801	2	1225.59	-0.006569	17.25	1	299	305	R	-	0	2012-08-10-Look-iTRAQ-pST-13-230.5438.5438.2.dta - 613.80180|1122|1348|2399|1017|2600|1431|2094|1915	566	['PPP6C']	T301: Phospho	FALSE	['NA']	FALSE	0.00873362	CID	No	N/A	N/A	N/A	N/A	1	17.25	1122	1348	2399	1017	2600	1431	2094	1915	1122	1348	2399
SNSPLPVPPSK|S3: Phospho	229	gi|20127499|ref|NP_006266.2|	1	arginine/serine-rich splicing factor 6 [Homo sapiens]	47891	47891	1	14	SNSPLPVPPSK	S3: Phospho	S303: Phospho	604.331	3	1809.99	-0.012465	14.19	1	301	311	R	A	0	2012-08-10-Look-iTRAQ-pST-15-70.2790.2790.3.dta - 604.33220|1379|1963|3541|2016|1628|2958|2306|2184	1625	['SRSF6']	S303: Phospho	FALSE	['NA']	FALSE	0.00702576	HCD	No	N/A	N/A	N/A	N/A	2	15.69	1798	2443	4277	2231	2255	3729	2511	2389	1379	1963	3541
HFRHDTPDSSPR|T6: Phospho; S10: Phospho	100	gi|14249338|ref|NP_116114.1|; gi|229577273|ref|NP_001153208.1|	2	BUD13 homolog isoform 1 [Homo sapiens]; BUD13 homolog isoform 2 [Homo sapiens]	86354; 67759	86354	3	43	HFRHDTPDSSPR	T6: Phospho; S10: Phospho	T123: Phospho; S127: Phospho	639.275	3	1914.81	-0.00603	16.51	1	118	129	R	R	1	2012-08-10-Look-iTRAQ-pST-0-700.1701.1701.3.dta - 639.27510|1441|1686|2051|1465|1390|1905|1361|2503	2342	['BUD13']	T123: Phospho; S127: Phospho				0.0017094	HCD	No	N/A	N/A	N/A	N/A	1	16.51	1441	1686	2051	1465	1390	1905	1361	2503	1441	1686	2051
DVTNFTVGGFAPMSPR|S14: Phospho	14	gi|20149524|ref|NP_003160.2|; gi|161169023|ref|NP_001104490.1|; gi|195546900|ref|NP_001124296.1|; gi|195546902|ref|NP_001124297.1|	4	suppressor of Ty 5 homolog isoform a [Homo sapiens]; suppressor of Ty 5 homolog isoform b [Homo sapiens]	140489; 139988	140489	4	50	DVTNFTVGGFAPMSPR	S14: Phospho	S666: Phospho	694	3	2078.98	-0.002205	46.97	1	653	668	R	I	0	2012-08-10-Look-iTRAQ-pST-22p5-30.3806.3806.3.dta - 694.00070|221|728|221|221|221|221|387|1436	1064	['SUPT5H']	S666: Phospho	FALSE	['NA']	FALSE	0	HCD	Yes	Yes	Yes	36.83	10.14	3	60.25	655	1661	655	901	655	819	991	2256	221	728	221
DTSPSSGSAVSSSK|S5: Phospho	84	gi|41872339|ref|NP_958846.1|; gi|219842244|ref|NP_001137259.1|; gi|219842247|ref|NP_001137260.1|; gi|219842250|ref|NP_001137261.1|; gi|41872344|ref|NP_958847.1|; gi|41872349|ref|NP_958848.1|; gi|41872368|ref|NP_958923.1|; gi|48255929|ref|NP_057572.5|	8	periphilin 1 isoform 5 [Homo sapiens]; periphilin 1 isoform 6 [Homo sapiens]; periphilin 1 isoform 7 [Homo sapiens]; periphilin 1 isoform 8 [Homo sapiens]; periphilin 1 isoform 3 [Homo sapiens]; periphilin 1 isoform 4 [Homo sapiens]; periphilin 1 isoform 2 [Homo sapiens]; periphilin 1 isoform 1 [Homo sapiens]	35242; 58561; 47101; 40052; 49865; 43737; 50786; 61945	35242	1	23	DTSPSSGSAVSSSK	S5: Phospho	S159: Phospho	662.324	3	1983.96	-0.011369	23.2	1	155	168	R	V	0	2012-08-10-Look-iTRAQ-pST-9-230.2253.2253.3.dta - 662.32410|693|216|1467|984|702|1065|435|448	2517	['PPHLN1']	S159: Phospho				0.00724638	CID	Yes	Yes	Yes	22.4	0.8	1	23.2	693	216	1467	984	702	1065	435	448	693	216	1467
RPSTFGIPR|S3: Phospho	85	gi|14670350|ref|NP_127492.1|; gi|14670352|ref|NP_127493.1|; gi|14670354|ref|NP_127494.1|; gi|169881252|ref|NP_001509.3|; gi|254692934|ref|NP_001157108.1|	5	general transcription factor IIi isoform 1 [Homo sapiens]; general transcription factor IIi isoform 2 [Homo sapiens]; general transcription factor IIi isoform 3 [Homo sapiens]; general transcription factor IIi isoform 4 [Homo sapiens]; general transcription factor IIi isoform 5 [Homo sapiens]	139021; 136277; 136712; 133968; 136641	139021	1	39	RPSTFGIPR	S3: Phospho	S784: Phospho	472.254	3	1413.74	-0.003495	39.29	1	782	790	R	L	0	2012-08-10-Look-iTRAQ-pST-15-70.3284.3284.3.dta - 472.25360|926|1859|3912|740|853|957|1196|971	1056	['GTF2I']	S784: Phospho	FALSE	['NA']	FALSE	0	HCD	No	N/A	N/A	N/A	N/A	1	39.29	926	1859	3912	740	853	957	1196	971	926	1859	3912
VATVSLPR|S5: Phospho	91	sp|TRYP_PIG|	1	Marto_Lab (cRAP)	28729	28729	2	37	VATVSLPR	S5: Phospho	S112: Phospho	613.841	2	1225.67	-0.00552	28.55	1	108	115	R	S	0	2012-08-10-Look-iTRAQ-pST-13-230.3711.3711.2.dta - 613.84210|5812|5774|4874|6701|6504|6262|7156|8218	567	['NA']	S112: Phospho	FALSE	['NA']	FALSE	0	HCD	No	N/A	N/A	N/A	N/A	2	36.78	7143	7263	6717	8434	8119	7862	8712	10507	5812	5774	4874
SLAIPSTPPNSPSHSPCPSPLPFEPR|S11: Phospho; S13: Phospho	105	gi|188497667|ref|NP_055864.2|	1	trafficking protein, kinesin binding 2 [Homo sapiens]	115957	115957	1	17	SLAIPSTPPNSPSHSPCPSPLPFEPR	S11: Phospho; S13: Phospho	S780: Phospho; S782: Phospho	809.13	4	3232.5	-0.006576	16.93	1	770	795	K	V	0	2012-08-10-Look-iTRAQ-pST-17p5-230.3849.3849.4.dta - 809.13060|218|218|218|218|218|218|218|349	1269	['TRAK2']	S780: Phospho; S782: Phospho	FALSE	['NA']	FALSE	0	CID	Yes	Yes	T7: Phospho; S11: Phospho	9.43	7.5	1	16.93	218	218	218	218	218	218	218	349	218	218	218
ELILDVVPSSR|S10: Phospho	60	gi|33286442|ref|NP_068765.2|	1	BCL6 co-repressor-like 1 [Homo sapiens]	211920	211920	1	31	ELILDVVPSSR	S10: Phospho	S1029: Phospho	537.959	3	1610.86	-0.004477	31.48	1	1020	1030	K	R	0	2012-08-10-Look-iTRAQ-pST-15-230.4672.4672.3.dta - 537.95950|212|212|212|212|212|212|350|212	779	['unresolved: gi|33286442|ref|NP_068765.2|']	S1029: Phospho	FALSE	['NA']	FALSE	0	CID	No	N/A	N/A	N/A	N/A	1	31.48	212	212	212	212	212	212	350	212	212	212	212
IEEELGSK|S7: Phospho	155	gi|4503571|ref|NP_001419.1|	1	enolase 1 [Homo sapiens]	59345	59345	1	31	IEEELGSK	S7: Phospho	S419: Phospho	531.614	3	1591.83	-0.011828	30.67	1	413	420	R	A	0	2012-08-10-Look-iTRAQ-pST-0-700.4766.4766.3.dta - 531.61420|1040|1450|2060|1778|1330|2107|1080|1623	1474	['ENO1']	S419: Phospho				0	HCD	No	N/A	N/A	N/A	N/A	1	30.67	1040	1450	2060	1778	1330	2107	1080	1623	1040	1450	2060
GGAPDPSPGATATPGAPAQPSSPDAR|S22: Phospho	30	gi|7705375|ref|NP_056982.1|	1	zinc finger and BTB domain containing 7A [Homo sapiens]	70413	70413	1	41	GGAPDPSPGATATPGAPAQPSSPDAR	S22: Phospho	S526: Phospho	905.426	3	2713.27	-0.00811	40.81	1	505	530	R	R	0	2012-08-10-Look-iTRAQ-pST-9-230.3429.3429.3.dta - 905.42660|212|212|212|212|212|212|212|338	2831	['ZBTB7A']	S526: Phospho				0	CID	No	N/A	N/A	N/A	N/A	3	40.81	212	212	212	212	212	212	212	338	212	212	212
SLSPILPGR|S1: Phospho	162	gi|41327769|ref|NP_056133.2|; gi|195972857|ref|NP_001124427.1|	2	Rho/Rac guanine nucleotide exchange factor 18 isoform a [Homo sapiens]; Rho/Rac guanine nucleotide exchange factor 18 isoform b [Homo sapiens]	133628; 151842	133628	1	24	SLSPILPGR	S1: Phospho	S943: Phospho	662.371	2	1322.73	0.00173	24.16	1	943	951	R	H	0	2012-08-10-Look-iTRAQ-pST-15-70.4083.4083.2.dta - 662.37120|1867|1416|1071|2842|1793|2088|1586|4389	918	['ARHGEF18']	S943: Phospho	FALSE	['NA']	FALSE	0.00362319	HCD	No	N/A	N/A	N/A	N/A	1	24.16	1867	1416	1071	2842	1793	2088	1586	4389	1867	1416	1071
LLSMPGAQGAAAAGSEPPPATTSPEGQPK|M4: Oxidation; S23: Phospho	41	gi|156142197|ref|NP_006700.3|; gi|156142199|ref|NP_079532.5|	2	euchromatic histone-lysine N-methyltransferase 2 isoform a [Homo sapiens]; euchromatic histone-lysine N-methyltransferase 2 isoform b [Homo sapiens]	151413; 148063	151413	1	36	LLSMPGAQGAAAAGSEPPPATTSPEGQPK	M4: Oxidation; S23: Phospho	M154: Oxidation; S173: Phospho	856.434	4	3421.7	0.002389	36.04	1	151	179	R	V	0	2012-08-10-Look-iTRAQ-pST-17p5-230.2927.2927.4.dta - 856.43430|205|205|205|334|205|205|205|205	1291	['EHMT2']	S173: Phospho	FALSE	['NA']	FALSE	0	CID	Yes	Yes	Yes	18.78	17.26	1	36.04	205	205	205	334	205	205	205	205	205	205	205
TNPPTQKPPSPPMSGR|S10: Phospho	141	gi|61743942|ref|NP_005461.2|; gi|61743944|ref|NP_001012768.1|; gi|61743946|ref|NP_001012769.1|; gi|61743948|ref|NP_001012770.1|	4	abl-interactor 1 isoform a [Homo sapiens]; abl-interactor 1 isoform b [Homo sapiens]; abl-interactor 1 isoform c [Homo sapiens]; abl-interactor 1 isoform d [Homo sapiens]	61853; 59242; 56152; 58007	61853	1	19	TNPPTQKPPSPPMSGR	S10: Phospho	S183: Phospho	595.811	4	2379.22	-0.008833	18.51	1	174	189	R	G	0	2012-08-10-Look-iTRAQ-pST-13-230.2347.2347.4.dta - 595.81150|358|295|210|603|210|210|399|210	1998	['ABI1']	S183: Phospho	FALSE	['NA']	FALSE	0.00961538	CID	No	N/A	N/A	N/A	N/A	1	18.51	358	295	210	603	210	210	399	210	358	295	210
NMPGLSAATLASLGGTSSR|M2: Oxidation; S18: Phospho	10	gi|212276070|ref|NP_004726.2|; gi|212276078|ref|NP_001131022.1|; gi|212276088|ref|NP_001131023.1|; gi|212276096|ref|NP_001131024.1|; gi|212276104|ref|NP_001131025.1|	5	leucine rich repeat (in FLII) interacting protein 1 isoform 4 [Homo sapiens]; leucine rich repeat (in FLII) interacting protein 1 isoform 1 [Homo sapiens]; leucine rich repeat (in FLII) interacting protein 1 isoform 2 [Homo sapiens]; leucine rich repeat (in FLII) interacting protein 1 isoform 3 [Homo sapiens]; leucine rich repeat (in FLII) interacting protein 1 isoform 5 [Homo sapiens]	106143; 89861; 57467; 110208; 102431	106143	6	72	NMPGLSAATLASLGGTSSR	M2: Oxidation; S18: Phospho	M100: Oxidation; S116: Phospho	731.029	3	2190.07	-0.000654	71.55	1	99	117	R	R	0	2012-08-10-Look-iTRAQ-pST-22p5-30.3245.3245.3.dta - 731.02940|209|741|519|611|209|655|753|209	1115	['LRRFIP1']	S116: Phospho	FALSE	['NA']	FALSE	0	HCD	Yes	Yes	Yes	25.42	46.13	3	71.55	424	956	734	947	424	870	968	424	209	741	519
DSGNWDTSGSELSEGELEKR|S13: Phospho	34	gi|151301228|ref|NP_060362.3|	1	formin binding protein 3 [Homo sapiens]	137174	137174	2	57	DSGNWDTSGSELSEGELEKR	S13: Phospho	S911: Phospho	721.838	4	2883.34	-0.014974	27.71	1	899	918	K	R	1	2012-08-10-Look-iTRAQ-pST-9-700.3872.3872.4.dta - 721.83780|206|432|1092|206|206|206|206|206	2098	['PRPF40A']	S911: Phospho	FALSE	['NA']	FALSE	0	HCD	No	N/A	N/A	N/A	N/A	1	27.71	206	432	1092	206	206	206	206	206	206	432	1092
LPIFSRLSISDD|S8: Phospho	70	gi|15812178|ref|NP_008818.3|; gi|15812180|ref|NP_004917.2|	2	zinc finger protein 36, C3H type-like 2 [Homo sapiens]; butyrate response factor 1 [Homo sapiens]	56867; 40397	56867	1	17	LPIFSRLSISDD	S8: Phospho	S490: Phospho	582.97	3	1745.89	-0.002515	16.69	1	483	494	R	-	1	2012-08-10-Look-iTRAQ-pST-20-230.4108.4108.3.dta - 582.97190|211|964|1117|680|378|1102|1661|211	529	['ZFP36L2', 'ZFP36L1']	S490: Phospho	FALSE	['NA']	FALSE	0	HCD	No	N/A	N/A	N/A	N/A	1	16.69	211	964	1117	680	378	1102	1661	211	211	964	1117
SPSLL|S3: Phospho	151	gi|110227613|ref|NP_114152.3|	1	centaurin, gamma 3 isoform a [Homo sapiens]	110724	110724	1	23	SPSLL	S3: Phospho	S909: Phospho	450.74	2	899.467	-0.00263	23.06	1	907	911	R	-	0	2012-08-10-Look-iTRAQ-pST-9-230.4878.4878.2.dta - 450.73980|2746|2627|3151|4710|4774|4299|6010|2820	256	['AGAP3']	S909: Phospho				0	HCD	No	N/A	N/A	N/A	N/A	1	23.06	2746	2627	3151	4710	4774	4299	6010	2820	2746	2627	3151
SLREDQQSFTGSR|S8: Phospho	117	gi|14702182|ref|NP_054865.2|; gi|118640875|ref|NP_115853.2|; gi|14702184|ref|NP_115852.1|	3	linker for activation of T cells family member 2 [Homo sapiens]	30165	30165	2	29	SLREDQQSFTGSR	S8: Phospho	S51: Phospho	632.301	3	1893.89	-0.007743	25.26	1	44	56	R	T	1	2012-08-10-Look-iTRAQ-pST-9-230.3255.3255.3.dta - 632.30120|653|1733|1311|1433|320|594|504|610	2342	['LAT2']	S51: Phospho				0	HCD	No	N/A	N/A	N/A	N/A	1	25.26	653	1733	1311	1433	320	594	504	610	653	1733	1311
TCSLPDLSK|S3: Phospho	172	gi|41872673|ref|NP_036356.1|	1	NIMA-related kinase 1 [Homo sapiens]	177362	177362	1	23	TCSLPDLSK	S3: Phospho	S1052: Phospho	570.296	3	1707.87	-0.007545	22.77	1	1050	1058	R	L	0	2012-08-10-Look-iTRAQ-pST-15-70.3557.3557.3.dta - 570.29510|1405|1896|3253|1151|1568|1409|1399|1846	1484	['NEK1']	S1052: Phospho	TRUE	['sp|Q96PY6|NEK1_HUMAN Serine/threonine-protein kinase Nek1 OS=Homo sapiens GN=NEK1 PE=1 SV=2']	TRUE	0.00338983	HCD	No	N/A	N/A	N/A	N/A	2	28.83	1919	2352	4053	1362	2048	1846	2174	2442	1405	1896	3253
ATSPLVSLYPALECR|S3: Phospho	37	gi|33457350|ref|NP_060072.1|; gi|209977019|ref|NP_001129629.1|; gi|209977021|ref|NP_001129630.1|; gi|209977067|ref|NP_001129631.1|	4	OTU domain containing 5 isoform a [Homo sapiens]; OTU domain containing 5 isoform b [Homo sapiens]; OTU domain containing 5 isoform b [Homo sapiens]; OTU domain containing 5 isoform c [Homo sapiens]	69619; 69203; 69203; 45586	69619	1	53	ATSPLVSLYPALECR	S3: Phospho	S508: Phospho	687.686	3	2060.03	0.004144	54.07	1	506	520	R	A	0	2012-08-10-Look-iTRAQ-pST-17p5-230.4111.4111.3.dta - 687.68590|441|754|615|630|700|504|804|592	892	['OTUD5']	S508: Phospho	FALSE	['NA']	FALSE	0	HCD	No	N/A	N/A	N/A	N/A	1	54.07	441	754	615	630	700	504	804	592	441	754	615
MSGESAR|S5: Phospho	133	gi|4758484|ref|NP_004823.1|	1	glutathione-S-transferase omega 1 [Homo sapiens]	35134	35134	1	16	MSGESAR	S5: Phospho	S5: Phospho	561.252	2	1120.49	0.000684	16.15	1	1	7	-	S	0	2012-08-10-Look-iTRAQ-pST-11-700.5091.5091.2.dta - 561.25210|615|476|593|518|216|382|216|872	225	['GSTO1']	S5: Phospho	FALSE	['NA']	FALSE	0	HCD	No	N/A	N/A	N/A	N/A	1	16.15	615	476	593	518	216	382	216	872	615	476	593
SASEPSLHR|S3: Phospho	152	gi|4502193|ref|NP_001645.1|; gi|4506401|ref|NP_002871.1|	2	v-raf murine sarcoma 3611 viral oncogene homolog [Homo sapiens]; v-raf-1 murine leukemia viral oncogene homolog 1 [Homo sapiens]	77771; 85667	77771	1	32	SASEPSLHR	S3: Phospho	S582: Phospho	456.557	3	1366.65	-0.004489	31.58	1	580	588	R	T	0	2012-08-10-Look-iTRAQ-pST-0-700.2110.2110.3.dta - 456.55740|521|959|837|1364|626|1915|724|1313	1001	['ARAF', 'RAF1']	S582: Phospho				0	HCD	No	N/A	N/A	N/A	N/A	1	31.58	521	959	837	1364	626	1915	724	1313	521	959	837
TPSDDEEDNLFTPPK|S3: Phospho	37	gi|154090959|ref|NP_060702.1|	1	hypothetical protein LOC55747 [Homo sapiens]	175331	175331	3	57	TPSDDEEDNLFTPPK	S3: Phospho	S245: Phospho	798.382	3	2392.13	-0.006217	24.84	1	243	257	R	L	0	2012-08-10-Look-iTRAQ-pST-9-700.4386.4386.3.dta - 798.38220|1309|209|209|209|209|209|1709|833	1819	['FAM21B']	S245: Phospho	FALSE	['NA']	FALSE	0	HCD	No	N/A	N/A	N/A	N/A	1	24.84	1309	209	209	209	209	209	1709	833	1309	209	209
SPSGSAFGSQENLR|S5: Phospho	103	gi|54112429|ref|NP_212132.2|	1	dedicator of cytokinesis 7 [Homo sapiens]	277353	277353	1	33	SPSGSAFGSQENLR	S5: Phospho	S1403: Phospho	607.621	3	1819.84	-0.001044	32.72	1	1399	1412	R	W	0	2012-08-10-Look-iTRAQ-pST-11-230.3621.3621.3.dta - 607.62100|210|210|210|421|471|411|423|393	1992	['DOCK7']	S1403: Phospho	FALSE	['NA']	FALSE	0	HCD	Yes	Yes	S1: Phospho	22.74	9.98	1	32.72	210	210	210	421	471	411	423	393	210	210	210
LFRPPSPAPAAPGAR|S6: Phospho	186	gi|58761510|ref|NP_078916.3|	1	ischemia/reperfusion inducible protein precursor [Homo sapiens]	31838	31838	1	16	LFRPPSPAPAAPGAR	S6: Phospho	S37: Phospho	630.34	3	1888	-0.003734	15.72	1	32	46	R	L	0	2012-08-10-Look-iTRAQ-pST-17p5-70.3295.3295.3.dta - 630.34030|979|1159|2625|1111|1613|1338|1113|1188	1347	['YRDC']	S37: Phospho	FALSE	['NA']	FALSE	0.00306748	HCD	No	N/A	N/A	N/A	N/A	1	15.72	979	1159	2625	1111	1613	1338	1113	1188	979	1159	2625
DGVSLGAVSSTEEASR|S4: Phospho; S10: Phospho	97	gi|254910960|ref|NP_001157196.1|	1	hypothetical protein LOC388588 [Homo sapiens]	10436	10436	1	34	DGVSLGAVSSTEEASR	S4: Phospho; S10: Phospho	S22: Phospho; S28: Phospho	676.966	3	2027.88	-0.000879	33.95	1	19	34	R	C	0	2012-08-10-Look-iTRAQ-pST-9-700.3509.3509.3.dta - 676.96530|456|452|382|629|439|499|539|551	1536	['LOC388588']	S22: Phospho; S28: Phospho	FALSE	['NA']	FALSE	0	HCD	No	N/A	N/A	N/A	N/A	1	33.95	456	452	382	629	439	499	539	551	456	452	382
GGQGDPAVPAQQPADPSTPER|T18: Phospho	131	gi|148298722|ref|NP_009081.2|	1	zinc finger protein 185 [Homo sapiens]	86257	86257	1	25	GGQGDPAVPAQQPADPSTPER	T18: Phospho	T447: Phospho	820.389	3	2458.14	0.000722	25.23	1	430	450	R	Q	0	2012-08-10-Look-iTRAQ-pST-0-700.2908.2908.3.dta - 820.38860|204|303|204|204|204|204|204|579	2953	['ZNF185']	T447: Phospho				0	CID	No	N/A	N/A	N/A	N/A	1	25.23	204	303	204	204	204	204	204	579	204	303	204
AASGWSPSWPNDGDLSD|S16: Phospho	23	gi|189217917|ref|NP_775829.2|	1	FYVE, RhoGEF and PH domain containing 2 [Homo sapiens]	85625	85625	1	36	AASGWSPSWPNDGDLSD	S16: Phospho	S654: Phospho	715.973	3	2144.9	-0.001358	35.79	1	639	655	R	-	0	2012-08-10-Look-iTRAQ-pST-17p5-700.4920.4920.3.dta - 715.97420|204|204|204|320|204|204|204|204	547	['FGD2']	S654: Phospho	FALSE	['NA']	FALSE	0	CID	No	N/A	N/A	N/A	N/A	1	35.79	204	204	204	320	204	204	204	204	204	204	204
TSLFANR|S2: Phospho	153	gi|7661962|ref|NP_055585.1|; gi|170650694|ref|NP_001116244.1|	2	centaurin, gamma 1 isoform PIKE-S [Homo sapiens]; centaurin, gamma 1 isoform PIKE-L [Homo sapiens]	102174; 143565	102174	3	25	TSLFANR	S2: Phospho	S312: Phospho	596.803	2	1191.6	-0.004598	20.02	1	311	317	R	R	0	2012-08-10-Look-iTRAQ-pST-15-70.3838.3838.2.dta - 596.80260|3338|3175|5683|3878|266|6616|7787|712	614	['AGAP2']	S312: Phospho	FALSE	['NA']	FALSE	0.00304878	HCD	No	N/A	N/A	N/A	N/A	1	20.02	3338	3175	5683	3878	266	6616	7787	712	3338	3175	5683
GCMANVTVTR|M3: Oxidation; T9: Phospho	191	gi|151301154|ref|NP_005952.2|	1	mucin 6, gastric [Homo sapiens]	277457	277457	1	19	GCMANVTVTR	M3: Oxidation; T9: Phospho	M2364: Oxidation; T2370: Phospho	754.848	2	1507.68	-0.001817	18.86	1	2362	2371	K	C	0	2012-08-10-Look-iTRAQ-pST-11-230.4821.4821.2.dta - 754.84740|211|211|332|391|487|456|211|625	1267	['MUC6']	T2370: Phospho	FALSE	['NA']	FALSE	0.00906344	HCD	No	N/A	N/A	N/A	N/A	1	18.86	211	211	332	391	487	456	211	625	211	211	332
TASGDYIDSSWELR|S3: Phospho	36	gi|28626504|ref|NP_113659.3|; gi|41281905|ref|NP_848537.1|	2	fermitin family homolog 3 short form [Homo sapiens]; fermitin family homolog 3 long form [Homo sapiens]	86600; 87122	86600	1	42	TASGDYIDSSWELR	S3: Phospho	S8: Phospho	661.972	3	1982.89	0.001063	42.61	1	6	19	K	V	0	2012-08-10-Look-iTRAQ-pST-13-700.3920.3920.3.dta - 661.97190|213|213|213|213|213|213|336|213	874	['FERMT3']	S8: Phospho	FALSE	['NA']	FALSE	0	HCD	Yes	Yes	Y6: Phospho	28.14	14.47	1	42.61	213	213	213	213	213	213	336	213	213	213	213
VDSPSHGLVTSSLCIPSPAR|S5: Phospho	81	gi|4503257|ref|NP_001341.1|; gi|215422366|ref|NP_001135442.1|; gi|215422388|ref|NP_001135441.1|	3	death-domain associated protein isoform a [Homo sapiens]; death-domain associated protein isoform b [Homo sapiens]	93016; 94575	93016	1	22	VDSPSHGLVTSSLCIPSPAR	S5: Phospho	S690: Phospho	822.079	3	2463.21	0.001265	22.2	1	686	705	R	L	0	2012-08-10-Look-iTRAQ-pST-17p5-230.3372.3372.3.dta - 822.07900|210|210|312|210|210|210|210|210	1086	['DAXX']	S690: Phospho	FALSE	['NA']	FALSE	0	CID	Yes	Yes	S3: Phospho	12.06	10.14	1	22.2	210	210	312	210	210	210	210	210	210	210	312
SLPNLSR|S1: Phospho	206	gi|149588928|ref|NP_065897.1|	1	SLAIN motif family, member 2 [Homo sapiens]	70947	70947	1	14	SLPNLSR	S1: Phospho	S413: Phospho	585.811	2	1169.61	-0.004638	13.7	1	413	419	R	T	0	2012-08-10-Look-iTRAQ-pST-13-230.3162.3162.2.dta - 585.81120|2711|4573|3815|4362|2769|4267|3391|3918	483	['SLAIN2']	S413: Phospho	FALSE	['NA']	FALSE	0.00280899	HCD	No	N/A	N/A	N/A	N/A	1	13.7	2711	4573	3815	4362	2769	4267	3391	3918	2711	4573	3815
RGSLSNAGDPEIVK|S3: Phospho	108	gi|156071450|ref|NP_002516.2|; gi|156071452|ref|NP_001095132.1|	2	nardilysin isoform a [Homo sapiens]; nardilysin isoform b [Homo sapiens]	164384; 155764	164384	1	31	RGSLSNAGDPEIVK	S3: Phospho	S94: Phospho	711.048	3	2130.13	-0.00598	31.26	1	92	105	R	S	1	2012-08-10-Look-iTRAQ-pST-11-230.3479.3479.3.dta - 711.04900|210|598|331|447|210|210|363|210	2465	['NRD1']	S94: Phospho	FALSE	['NA']	FALSE	0	HCD	Yes	Yes	S5: Phospho	20.83	10.43	1	31.26	210	598	331	447	210	210	363	210	210	598	331
RPISDDDCPSASK|S4: Phospho	179	gi|23312364|ref|NP_690856.1|	1	ubiquitin-like with PHD and ring finger domains 2 [Homo sapiens]	109948	109948	1	18	RPISDDDCPSASK	S4: Phospho	S667: Phospho	534.76	4	2135.02	-0.008728	17.82	1	664	676	K	V	0	2012-08-10-Look-iTRAQ-pST-9-700.2315.2315.4.dta - 534.75980|203|642|1322|451|355|567|491|203	1658	['UHRF2']	S667: Phospho	FALSE	['NA']	FALSE	0	HCD	No	N/A	N/A	N/A	N/A	1	17.82	203	642	1322	451	355	567	491	203	203	642	1322
SPSPLVSLQAVK|S3: Phospho	143	gi|31657123|ref|NP_852608.1|; gi|31657125|ref|NP_852609.1|; gi|31657127|ref|NP_009147.3|	3	Hermansky-Pudlak syndrome 5 isoform a [Homo sapiens]; Hermansky-Pudlak syndrome 5 isoform b [Homo sapiens]; Hermansky-Pudlak syndrome 5 isoform b [Homo sapiens]	148472; 134164; 134164	148472	1	26	SPSPLVSLQAVK	S3: Phospho	S534: Phospho	638.703	3	1913.08	0.001598	25.92	1	532	543	R	E	0	2012-08-10-Look-iTRAQ-pST-17p5-70.3946.3946.3.dta - 638.70240|924|708|1510|1426|1240|1300|1038|744	1372	['HPS5']	S534: Phospho	FALSE	['NA']	FALSE	0	HCD	No	N/A	N/A	N/A	N/A	1	25.92	924	708	1510	1426	1240	1300	1038	744	924	708	1510
GAASTLVPGVSETSASPGSPSVR|S16: Phospho	186	gi|146219843|ref|NP_006653.2|	1	Snf2-related CBP activator protein [Homo sapiens]	376634	376634	1	16	GAASTLVPGVSETSASPGSPSVR	S16: Phospho	S2787: Phospho	833.418	3	2497.24	-0.004104	16.32	1	2772	2794	R	S	0	2012-08-10-Look-iTRAQ-pST-15-230.3159.3159.3.dta - 833.41750|206|206|206|206|206|206|206|314	1741	['SRCAP']	S2787: Phospho	FALSE	['NA']	FALSE	0	HCD	Yes	Yes	S19: Phospho	16.23	0.09	1	16.32	206	206	206	206	206	206	206	314	206	206	206
ELSPAALEK|S3: Phospho	87	gi|19557702|ref|NP_006744.2|	1	surfeit 6 [Homo sapiens]	56141	56141	1	27	ELSPAALEK	S3: Phospho	S138: Phospho	549.304	3	1644.89	-0.003945	27	1	136	144	K	R	0	2012-08-10-Look-iTRAQ-pST-11-700.3305.3305.3.dta - 549.30380|1331|208|1035|1180|730|1076|576|776	695	['SURF6']	S138: Phospho	FALSE	['NA']	FALSE	0	HCD	Yes	Yes	Yes	25.7	1.3	1	27	1331	208	1035	1180	730	1076	576	776	1331	208	1035
TNPSPTNPFSSDLQK|S4: Phospho	114	gi|20070356|ref|NP_003735.3|; gi|54144625|ref|NP_001005743.1|; gi|54144627|ref|NP_001005744.1|; gi|54144629|ref|NP_001005745.1|	4	numb homolog isoform 3 [Homo sapiens]; numb homolog isoform 1 [Homo sapiens]; numb homolog isoform 2 [Homo sapiens]; numb homolog isoform 4 [Homo sapiens]	80415; 82699; 77132; 74848	80415	1	29	TNPSPTNPFSSDLQK	S4: Phospho	S623: Phospho	774.391	3	2320.16	-0.006396	29.47	1	620	634	R	T	0	2012-08-10-Look-iTRAQ-pST-15-230.3372.3372.3.dta - 774.39000|203|827|494|277|631|272|1101|450	1667	['NUMB']	S623: Phospho	FALSE	['NA']	FALSE	0	HCD	Yes	Yes	Yes	17.58	11.89	1	29.47	203	827	494	277	631	272	1101	450	203	827	494
SSFDEMLPGTHFQR|S2: Phospho	187	gi|51873036|ref|NP_002532.2|; gi|259013553|ref|NP_001158508.1|	2	oxoglutarate dehydrogenase isoform 1 precursor [Homo sapiens]; oxoglutarate dehydrogenase isoform 3 precursor [Homo sapiens]	132573; 132209	132573	2	16	SSFDEMLPGTHFQR	S2: Phospho	S871: Phospho	679.31	3	2034.92	-0.008743	15.99	1	870	883	R	V	0	2012-08-10-Look-iTRAQ-pST-0-700.5516.5516.3.dta - 679.30990|215|215|316|215|215|215|215|215	2634	['OGDH']	S871: Phospho				0.0075188	CID	No	N/A	N/A	N/A	N/A	1	15.99	215	215	316	215	215	215	215	215	215	215	316
SPSPAPAPAPAAAAGPPTR|S1: Phospho; S3: Phospho	8	gi|226509740|ref|NP_067051.2|	1	SR-related CTD-associated factor 1 [Homo sapiens]	165367	165367	5	71	SPSPAPAPAPAAAAGPPTR	S1: Phospho; S3: Phospho	S498: Phospho; S500: Phospho	716.677	3	2147.01	-0.002371	25.13	1	498	516	R	K	0	2012-08-10-Look-iTRAQ-pST-9-230.3314.3314.3.dta - 716.67740|207|207|207|319|207|207|207|207	2696	['SCAF1']	S498: Phospho; S500: Phospho				0	CID	Yes	Yes	Yes	18.85	6.28	3	51.98	207	207	207	319	207	207	207	207	207	207	207
TVIRLPSGSGAASPTGSAVDIR|S13: Phospho	20	gi|61743954|ref|NP_001611.1|	1	AHNAK nucleoprotein isoform 1 [Homo sapiens]	881095	881095	2	56	TVIRLPSGSGAASPTGSAVDIR	S13: Phospho	S216: Phospho	624.833	4	2495.31	-0.004105	24.75	1	204	225	K	A	1	2012-08-10-Look-iTRAQ-pST-17p5-70.3782.3782.4.dta - 624.83220|208|208|208|208|208|208|322|208	1676	['AHNAK']	S216: Phospho	FALSE	['NA']	FALSE	0	CID	No	N/A	N/A	N/A	N/A	1	24.75	208	208	208	208	208	208	322	208	208	208	208
RTSEEDTPK|S3: Phospho	150	gi|18644730|ref|NP_115705.2|	1	inhibitor of growth family, member 5 [Homo sapiens]	36459	36459	1	22	RTSEEDTPK	S3: Phospho	S148: Phospho	584.298	3	1749.88	-0.003174	21.57	1	146	154	R	K	1	2012-08-10-Look-iTRAQ-pST-0-700.1827.1827.3.dta - 584.29820|1937|2375|4962|3294|2562|3645|1645|2527	1879	['ING5']	S148: Phospho				0	CID	Yes	Yes	Yes	11.46	10.11	1	21.57	1937	2375	4962	3294	2562	3645	1645	2527	1937	2375	4962
SIFDGFR|S1: Phospho	139	gi|149944496|ref|NP_056377.1|	1	UBX domain containing 7 [Homo sapiens]	63441	63441	1	12	SIFDGFR	S1: Phospho	S106: Phospho	613.298	2	1224.58	-0.002898	12.08	1	106	112	R	D	0	2012-08-10-Look-iTRAQ-pST-17p5-230.3702.3702.2.dta - 613.29880|2254|2470|1465|3029|1834|2577|3558|2943	273	['UBXN7']	S106: Phospho	FALSE	['NA']	FALSE	0.00431034	HCD	No	N/A	N/A	N/A	N/A	1	12.08	2254	2470	1465	3029	1834	2577	3558	2943	2254	2470	1465
SESLSNCSIGK|S1: Phospho	152	gi|140161500|ref|NP_056060.2|	1	ankyrin repeat and sterile alpha motif domain containing 1 [Homo sapiens]	144383	144383	1	25	SESLSNCSIGK	S1: Phospho	S645: Phospho	623.974	3	1868.92	-0.015866	24.6	1	645	655	R	K	0	2012-08-10-Look-iTRAQ-pST-11-230.3346.3346.3.dta - 623.97460|730|877|1642|652|718|972|653|1007	2084	['ANKS1A']	S645: Phospho	FALSE	['NA']	FALSE	0.00813008	HCD	No	N/A	N/A	N/A	N/A	1	24.6	730	877	1642	652	718	972	653	1007	730	877	1642
VPDSPSPAPSLEEGR|S6: Phospho; S10: Phospho	207	gi|259490226|ref|NP_542937.2|	1	dachshund homolog 1 isoform a [Homo sapiens]	84202	84202	2	22	VPDSPSPAPSLEEGR	S6: Phospho; S10: Phospho	S443: Phospho; S447: Phospho	667.965	3	2000.88	-0.007418	22.31	1	438	452	R	R	0	2012-08-10-Look-iTRAQ-pST-0-700.4063.4063.3.dta - 667.96480|208|208|1553|208|208|590|208|208	2509	['DACH1']	S443: Phospho; S447: Phospho				0.0021978	HCD	No	N/A	N/A	N/A	N/A	1	22.31	208	208	1553	208	208	590	208	208	208	208	1553
SPVVELSK|S1: Phospho	49	gi|148539876|ref|NP_001610.2|	1	beta-adrenergic receptor kinase 1 [Homo sapiens]	97052	97052	1	40	SPVVELSK	S1: Phospho	S670: Phospho	516.292	3	1545.86	-0.008007	39.85	1	670	677	R	V	0	2012-08-10-Look-iTRAQ-pST-11-700.2930.2930.3.dta - 516.29230|208|1127|1450|1720|1677|1766|1836|208	572	['ADRBK1']	S670: Phospho	TRUE	['sp|P25098|ARBK1_HUMAN Beta-adrenergic receptor kinase 1 OS=Homo sapiens GN=ADRBK1 PE=1 SV=2']	TRUE	0	HCD	Yes	Yes	Yes	28.29	11.56	2	39.85	675	1775	2091	2446	2577	2616	3476	908	208	1127	1450
RISGLIYEETR|S3: Phospho	5	gi|4504301|ref|NP_003529.1|; gi|11415030|ref|NP_068803.1|; gi|28173560|ref|NP_778224.1|; gi|4504303|ref|NP_003530.1|; gi|4504305|ref|NP_003531.1|; gi|4504307|ref|NP_003532.1|; gi|4504309|ref|NP_003533.1|; gi|4504311|ref|NP_003534.1|; gi|4504313|ref|NP_003535.1|; gi|4504315|ref|NP_003536.1|; gi|4504317|ref|NP_003537.1|; gi|4504321|ref|NP_003486.1|; gi|4504323|ref|NP_003539.1|; gi|77539758|ref|NP_0…	14	histone cluster 1, H4a [Homo sapiens]; histone cluster 1, H4j [Homo sapiens]; histone cluster 4, H4 [Homo sapiens]; histone cluster 1, H4d [Homo sapiens]; histone cluster 1, H4f [Homo sapiens]; histone cluster 1, H4k [Homo sapiens]; histone cluster 1, H4c [Homo sapiens]; histone cluster 1, H4h [Homo sapiens]; histone cluster 1, H4b [Homo sapiens]; histone cluster 1, H4e [Homo sapiens]; histone cl…	15011	15011	2	96	RISGLIYEETR	S3: Phospho	S48: Phospho	574.303	3	1719.89	0.000865	56.75	1	46	56	K	G	1	2012-08-10-Look-iTRAQ-pST-15-230.3571.3571.3.dta - 574.30150|859|765|982|989|1332|1090|896|1403	942	['HIST1H4A', 'HIST1H4J', 'HIST4H4', 'HIST1H4D', 'HIST1H4F', 'HIST1H4K', 'HIST1H4C', 'HIST1H4H', 'HIST1H4B', 'HIST1H4E', 'HIST1H4L', 'HIST1H4I', 'HIST2H4A', 'HIST2H4B']	S48: Phospho	FALSE	['NA']	FALSE	0	HCD	Yes	Yes	Yes	20.3	36.45	2	56.75	1075	1252	1409	1498	1760	1472	1241	1869	859	765	982
YHGHSMSDPGVSYRTR|S5: Phospho; S12: Phospho	6	gi|4505685|ref|NP_000275.1|; gi|4885543|ref|NP_005381.1|	2	pyruvate dehydrogenase E1 alpha 1 precursor [Homo sapiens]; pyruvate dehydrogenase E1 alpha 2 precursor [Homo sapiens]	51253; 50948	51253	19	74	YHGHSMSDPGVSYRTR	S5: Phospho; S12: Phospho	S293: Phospho; S300: Phospho	579.25	4	2312.97	-7e-05	24.9	1	289	304	R	E	1	2012-08-10-Look-iTRAQ-pST-13-700.2312.2312.4.dta - 579.25030|554|208|1037|247|208|879|208|1144	1163	['PDHA1', 'PDHA2']	S293: Phospho; S300: Phospho	FALSE	['NA']	FALSE	0	HCD	No	N/A	N/A	N/A	N/A	1	24.9	554	208	1037	247	208	879	208	1144	554	208	1037
TEESPASDEAGEK|S4: Phospho; S7: Phospho	16	gi|48255933|ref|NP_004956.5|; gi|239746084|ref|XP_002343654.1|; gi|239751572|ref|XP_002347904.1|; gi|239757062|ref|XP_002345158.1|	4	high-mobility group nucleosome binding domain 1 [Homo sapiens]; PREDICTED: similar to hCG1979072 [Homo sapiens]; PREDICTED: similar to hCG1979072 [Homo sapiens]; PREDICTED: similar to hCG1979072 [Homo sapiens]	17345; 19709; 19709; 19709	17345	5	53	TEESPASDEAGEK	S4: Phospho; S7: Phospho	S86: Phospho; S89: Phospho	706.638	3	2116.91	-0.01288	19.77	1	83	95	K	E	0	2012-08-10-Look-iTRAQ-pST-17p5-700.4059.4059.3.dta - 706.63960|768|951|1685|1137|1226|1404|822|1198	515	['HMGN1', 'unresolved: gi|239746084|ref|XP_002343654.1|', 'unresolved: gi|239751572|ref|XP_002347904.1|', 'unresolved: gi|239757062|ref|XP_002345158.1|']	S86: Phospho; S89: Phospho	FALSE	['NA']	FALSE	0	HCD	No	N/A	N/A	N/A	N/A	10	31.31	2788	3758	10036	4295	5918	5400	3245	3787	768	951	1685
AFSFSLPRPGR|S3: Phospho; S5: Phospho	131	gi|24797103|ref|NP_722541.1|; gi|149158727|ref|NP_001092140.1|; gi|149158729|ref|NP_001092141.1|	3	RAS guanyl releasing protein 2 [Homo sapiens]	79186	79186	1	17	AFSFSLPRPGR	S3: Phospho; S5: Phospho	S576: Phospho; S578: Phospho	566.939	3	1697.8	-0.003523	16.57	1	574	584	R	R	0	2012-08-10-Look-iTRAQ-pST-20-30.4506.4506.3.dta - 566.94000|633|3492|2074|2335|751|5779|3108|1657	1044	['RASGRP2']	S576: Phospho; S578: Phospho	FALSE	['NA']	FALSE	0	HCD	No	N/A	N/A	N/A	N/A	1	16.57	633	3492	2074	2335	751	5779	3108	1657	633	3492	2074
EGSPGDQAAALLTAR|S3: Phospho	19	gi|13129036|ref|NP_076966.1|; gi|145701019|ref|NP_001078836.1|	2	zinc finger protein 655 isoform b [Homo sapiens]	21076	21076	1	56	EGSPGDQAAALLTAR	S3: Phospho	S60: Phospho	614.307	3	1839.9	-0.003055	56.21	1	58	72	R	Y	0	2012-08-10-Look-iTRAQ-pST-13-230.4518.4518.3.dta - 614.30770|213|213|522|375|480|501|213|406	1519	['ZNF655']	S60: Phospho	FALSE	['NA']	FALSE	0	CID	Yes	Yes	Yes	54.98	1.23	1	56.21	213	213	522	375	480	501	213	406	213	213	522
LLEDSEESSEETVSR|S5: Phospho	11	gi|255982614|ref|NP_003578.2|; gi|256000749|ref|NP_001157711.1|	2	DEAH (Asp-Glu-Ala-His) box polypeptide 16 isoform 1 [Homo sapiens]; DEAH (Asp-Glu-Ala-His) box polypeptide 16 isoform 2 [Homo sapiens]	139343; 132481	139343	1	76	LLEDSEESSEETVSR	S5: Phospho	S103: Phospho	698.653	3	2092.94	0.00116	75.78	1	99	113	R	A	0	2012-08-10-Look-iTRAQ-pST-9-700.3606.3606.3.dta - 698.65170|260|475|932|440|621|756|405|520	1612	['DHX16']	S103: Phospho	FALSE	['NA']	FALSE	0	HCD	Yes	Yes	Yes	36.65	39.13	1	75.78	260	475	932	440	621	756	405	520	260	475	932
SSQSEGIFLGSESDEDSVR|S11: Phospho	128	gi|197313748|ref|NP_054878.5|	1	SET domain containing 2 [Homo sapiens]	354019	354019	2	37	SSQSEGIFLGSESDEDSVR	S11: Phospho	S321: Phospho	805.027	3	2412.06	-0.005402	38.69	1	311	329	K	T	0	2012-08-10-Look-iTRAQ-pST-0-700.5120.5120.3.dta - 805.02680|211|211|301|211|211|211|211|211	2916	['SETD2']	S321: Phospho				0	HCD	Yes	Yes	Yes	38.45	0.24	1	38.69	211	211	301	211	211	211	211	211	211	211	301
RPSSFVTVR|S3: Phospho	67	gi|33356170|ref|NP_004136.2|	1	myosin IXB isoform 1 [Homo sapiens]	296257	296257	2	43	RPSSFVTVR	S3: Phospho	S2049: Phospho	478.26	3	1431.75	0.004621	27.61	1	2047	2055	R	V	0	2012-08-10-Look-iTRAQ-pST-15-70.3081.3081.3.dta - 478.25970|3137|2796|2035|4048|2794|3063|3931|3787	1113	['MYO9B']	S2049: Phospho	FALSE	['NA']	FALSE	0	HCD	No	N/A	N/A	N/A	N/A	1	27.61	3137	2796	2035	4048	2794	3063	3931	3787	3137	2796	2035
KDQESPK|S5: Phospho	185	gi|40254823|ref|NP_005532.2|; gi|64085167|ref|NP_001017915.1|	2	SH2 containing inositol phosphatase isoform b [Homo sapiens]; SH2 containing inositol phosphatase isoform a [Homo sapiens]	162618; 162717	162618	1	17	KDQESPK	S5: Phospho	S1038: Phospho	456.754	4	1823	-0.010453	16.67	1	1034	1040	R	M	1	2012-08-10-Look-iTRAQ-pST-9-700.1733.1733.4.dta - 456.75380|208|1926|4404|673|2120|3133|3009|1010	1121	['INPP5D']	S1038: Phospho	FALSE	['NA']	FALSE	0	HCD	No	N/A	N/A	N/A	N/A	1	16.67	208	1926	4404	673	2120	3133	3009	1010	208	1926	4404
QGGSQPSSFSPGQSQVTPQDQEK|S10: Phospho	42	gi|14149675|ref|NP_056050.1|	1	cleavage stimulation factor, 3' pre-RNA, subunit 2, 64kDa, tau variant [Homo sapiens]	69795	69795	1	34	QGGSQPSSFSPGQSQVTPQDQEK	S10: Phospho	S563: Phospho	1031.5	3	3091.47	-0.00278	34.11	1	554	576	K	A	0	2012-08-10-Look-iTRAQ-pST-11-700.2598.2598.3.dta - 1031.49680|212|212|302|212|212|212|212|212	1689	['CSTF2T']	S563: Phospho	FALSE	['NA']	FALSE	0	CID	No	N/A	N/A	N/A	N/A	1	34.11	212	212	302	212	212	212	212	212	212	212	302
STAPSAAASASASAAASSPAGGGAEALELLEHCGVCR|S18: Phospho	3	gi|5032179|ref|NP_005753.1|	1	tripartite motif-containing 28 protein [Homo sapiens]	103342	103342	1	61	STAPSAAASASASAAASSPAGGGAEALELLEHCGVCR	S18: Phospho	S50: Phospho	957.446	4	3825.76	-0.004553	61.19	1	33	69	R	E	0	2012-08-10-Look-iTRAQ-pST-22p5-70.3462.3462.4.dta - 957.44680|213|213|618|213|366|213|213|213	1147	['TRIM28']	S50: Phospho	FALSE	['NA']	FALSE	0	HCD	Yes	Yes	Yes	30.78	30.41	4	75.47	213	213	618	213	366	213	213	213	213	213	618
LASPSGSTSSGLEVVAPEGTSAPGGGPGTLDDSATICR|S3: Phospho; S5: Phospho; S7: Phospho	21	gi|5032179|ref|NP_005753.1|	1	tripartite motif-containing 28 protein [Homo sapiens]	103342	103342	3	59	LASPSGSTSSGLEVVAPEGTSAPGGGPGTLDDSATICR	S3: Phospho; S5: Phospho; S7: Phospho	S594: Phospho; S596: Phospho; S598: Phospho	1026.45	4	4101.78	-0.005572	31.16	1	592	629	R	V	0	2012-08-10-Look-iTRAQ-pST-15-70.6984.6984.4.dta - 1026.45310|215|215|306|215|215|215|215|215	2311	['TRIM28']	S594: Phospho; S596: Phospho; S598: Phospho	FALSE	['NA']	FALSE	0	CID	No	N/A	N/A	N/A	N/A	1	31.16	215	215	306	215	215	215	215	215	215	215	306
RFSLSVPR|S3: Phospho	106	gi|47078229|ref|NP_002587.2|; gi|47078231|ref|NP_997667.1|; gi|47078233|ref|NP_997668.1|	3	PCTAIRE protein kinase 3 isoform b [Homo sapiens]; PCTAIRE protein kinase 3 isoform a [Homo sapiens]	62946; 66458	62946	1	34	RFSLSVPR	S3: Phospho	S14: Phospho	449.247	3	1344.72	-0.001586	33.91	1	12	19	R	T	1	2012-08-10-Look-iTRAQ-pST-17p5-70.3213.3213.3.dta - 449.24750|1706|1781|2191|1319|1930|927|3664|1046	768	['CDK18']	S14: Phospho	TRUE	['sp|Q07002|CDK18_HUMAN Cyclin-dependent kinase 18 OS=Homo sapiens GN=CDK18 PE=1 SV=3']	TRUE	0	HCD	No	N/A	N/A	N/A	N/A	1	33.91	1706	1781	2191	1319	1930	927	3664	1046	1706	1781	2191
RDSQDGSSYR|S3: Phospho	85	gi|5453710|ref|NP_006139.1|	1	LIM and SH3 protein 1 [Homo sapiens]	36790	36790	1	48	RDSQDGSSYR	S3: Phospho	S146: Phospho	518.9	3	1553.68	0.000137	48.8	1	144	153	R	R	1	2012-08-10-Look-iTRAQ-pST-0-700.1452.1452.3.dta - 518.90010|660|1252|2440|887|1164|2784|2366|957	1404	['LASP1']	S146: Phospho				0	HCD	Yes	Yes	Yes	17.69	31.11	1	48.8	660	1252	2440	887	1164	2784	2366	957	660	1252	2440
QNSLHGSFHSADVLK|S3: Phospho	203	gi|38787935|ref|NP_942595.1|	1	BMP-2 inducible kinase isoform a [Homo sapiens]	150329	150329	1	12	QNSLHGSFHSADVLK	S3: Phospho	S1107: Phospho	582.803	4	2327.19	-0.007005	12.37	1	1105	1119	R	M	0	2012-08-10-Look-iTRAQ-pST-15-230.2717.2717.4.dta - 582.80240|865|760|905|916|542|847|573|996	1669	['BMP2K']	S1107: Phospho	TRUE	['sp|Q9NSY1|BMP2K_HUMAN BMP-2-inducible protein kinase OS=Homo sapiens GN=BMP2K PE=1 SV=2']	TRUE	0.00298507	HCD	No	N/A	N/A	N/A	N/A	1	12.37	865	760	905	916	542	847	573	996	865	760	905
TSQVGAASAPAKESPR|S14: Phospho	32	gi|57164977|ref|NP_001008656.1|; gi|207113160|ref|NP_001128715.1|; gi|207113162|ref|NP_001128716.1|; gi|207113164|ref|NP_001128717.1|; gi|57164975|ref|NP_000347.2|; gi|57164979|ref|NP_001008657.1|	6	Treacher Collins-Franceschetti syndrome 1 isoform a [Homo sapiens]; Treacher Collins-Franceschetti syndrome 1 isoform d [Homo sapiens]; Treacher Collins-Franceschetti syndrome 1 isoform e [Homo sapiens]; Treacher Collins-Franceschetti syndrome 1 isoform f [Homo sapiens]; Treacher Collins-Franceschetti syndrome 1 isoform b [Homo sapiens]; Treacher Collins-Franceschetti syndrome 1 isoform c [Homo s…	198587; 203654; 198686; 192924; 192825; 124800	198587	1	41	TSQVGAASAPAKESPR	S14: Phospho	S381: Phospho	562.049	4	2244.17	-0.006839	41.47	1	368	383	K	K	1	2012-08-10-Look-iTRAQ-pST-11-230.2174.2174.4.dta - 562.04910|205|205|205|564|205|326|205|205	2551	['unresolved: gi|57164977|ref|NP_001008656.1|', 'TCOF1']	S381: Phospho	FALSE	['NA']	FALSE	0	CID	Yes	Yes	Yes	18.29	23.18	1	41.47	205	205	205	564	205	326	205	205	205	205	205
TPGVLLPGAGGAAGFGMTSPPPPTSPSR|M17: Oxidation; S25: Phospho	11	gi|56549696|ref|NP_056224.2|	1	E1A binding protein p400 [Homo sapiens]	386237	386237	9	56	TPGVLLPGAGGAAGFGMTSPPPPTSPSR	M17: Oxidation; S25: Phospho	M313: Oxidation; S321: Phospho	745.126	4	2976.47	0.00408	56.21	1	297	324	R	T	0	2012-08-10-Look-iTRAQ-pST-22p5-30.3654.3654.4.dta - 745.12730|214|214|214|435|214|214|214|214	1298	['EP400']	S321: Phospho	FALSE	['NA']	FALSE	0	CID	Yes	Yes	M17: Oxidation; S27: Phospho	29.14	27.07	7	56.21	426	426	426	782	426	515	426	426	214	214	214
TPDYFL|T1: Phospho	200	gi|4506017|ref|NP_002706.1|; gi|4758952|ref|NP_004147.1|; gi|57222565|ref|NP_001009552.1|	3	protein phosphatase 2, catalytic subunit, alpha isoform [Homo sapiens]; protein phosphatase 2, catalytic subunit, beta isoform [Homo sapiens]; protein phosphatase 2, catalytic subunit, beta isoform [Homo sapiens]	40096; 39773; 39773	40096	1	23	TPDYFL	T1: Phospho	T304: Phospho	570.269	2	1138.53	-0.002828	23.85	1	304	309	R	-	0	2012-08-10-Look-iTRAQ-pST-0-700.6501.6501.2.dta - 570.26870|883|1341|2915|897|2741|2172|2237|1838	520	['PPP2CA', 'unresolved: gi|4758952|ref|NP_004147.1|', 'PPP2CB']	T304: Phospho				0	HCD	Yes	Yes	Yes	17.2	6.65	2	23.85	1097	1771	3670	1111	3443	2549	2959	2359	883	1341	2915
SAPPSPPPPGTR|S5: Phospho	81	gi|11545817|ref|NP_071390.1|	1	G-protein signaling modulator 3 (AGS3-like, C. elegans) [Homo sapiens]	18273	18273	2	37	SAPPSPPPPGTR	S5: Phospho	S39: Phospho	772.891	2	1543.77	-0.00294	22.44	1	35	46	R	H	0	2012-08-10-Look-iTRAQ-pST-9-230.2294.2294.2.dta - 772.89120|767|1169|558|1299|1054|462|743|1745	1571	['GPSM3']	S39: Phospho				0	HCD	No	N/A	N/A	N/A	N/A	2	36.88	1280	2147	1477	1932	2069	1280	1354	3046	767	1169	558
HRHSPTGPPGFPR|S4: Phospho	189	gi|20127479|ref|NP_005667.2|	1	RNA binding motif protein 10 isoform 1 [Homo sapiens]	119326	119326	1	15	HRHSPTGPPGFPR	S4: Phospho	S89: Phospho	457.481	4	1825.9	-0.008188	15.14	1	86	98	R	D	1	2012-08-10-Look-iTRAQ-pST-17p5-70.1892.1892.4.dta - 457.48190|457|584|441|678|208|578|208|696	1269	['RBM10']	S89: Phospho	FALSE	['NA']	FALSE	0.00299401	HCD	No	N/A	N/A	N/A	N/A	3	32.54	870	1123	1497	1120	621	1639	621	1593	457	584	441
QASIELPSMAVASTK|S3: Phospho	108	gi|10880979|ref|NP_002330.1|; gi|61742789|ref|NP_001013271.1|; gi|61742791|ref|NP_001013272.1|; gi|61742793|ref|NP_001013273.1|	4	lymphocyte-specific protein 1 isoform 1 [Homo sapiens]; lymphocyte-specific protein 1 isoform 2 [Homo sapiens]; lymphocyte-specific protein 1 isoform 2 [Homo sapiens]; lymphocyte-specific protein 1 isoform 2 [Homo sapiens]	44698; 37363; 37363; 37363	44698	1	24	QASIELPSMAVASTK	S3: Phospho	S252: Phospho	556.05	4	2220.17	0.003966	24.04	1	250	264	R	S	0	2012-08-10-Look-iTRAQ-pST-20-30.3642.3642.4.dta - 556.05080|214|214|214|612|214|366|214|214	1424	['LSP1']	S252: Phospho	FALSE	['NA']	FALSE	0	HCD	No	N/A	N/A	N/A	N/A	2	25.58	423	423	423	898	423	575	423	423	214	214	214
RLSSTSLASGHSVR|T5: Phospho	70	gi|19923468|ref|NP_057541.2|; gi|120659782|ref|NP_001073349.1|; gi|120659785|ref|NP_001073350.1|; gi|120659787|ref|NP_001073351.1|	4	protein kinase D2 isoform A [Homo sapiens]; protein kinase D2 isoform B [Homo sapiens]	110445; 92403	110445	2	43	RLSSTSLASGHSVR	T5: Phospho	T199: Phospho	461.242	4	1840.95	-0.005968	43.05	1	195	208	R	L	1	2012-08-10-Look-iTRAQ-pST-15-70.2191.2191.4.dta - 461.24290|957|473|1137|1170|1126|1042|714|872	1673	['PRKD2']	T199: Phospho	TRUE	['sp|Q9BZL6|KPCD2_HUMAN Serine/threonine-protein kinase D2 OS=Homo sapiens GN=PRKD2 PE=1 SV=2']	TRUE	0	HCD	Yes	MWMVRWPVNYR		22.76	20.29	1	43.05	957	473	1137	1170	1126	1042	714	872	957	473	1137
AGMTSSPDATTGQTFG|S6: Phospho	10	gi|145386566|ref|NP_068799.2|	1	zinc finger protein 148 [Homo sapiens]	108409	108409	2	56	AGMTSSPDATTGQTFG	S6: Phospho	S784: Phospho	956.917	2	1911.82	-0.003837	56.23	1	779	794	R	-	0	2012-08-10-Look-iTRAQ-pST-11-230.4064.4064.2.dta - 956.91750|208|208|433|570|208|651|208|208	2168	['ZNF148']	S784: Phospho	FALSE	['NA']	FALSE	0	CID	Yes	Yes	Yes	18.66	37.57	1	56.23	208	208	433	570	208	651	208	208	208	208	433
LFHRHSK|S6: Phospho	155	gi|33636738|ref|NP_891993.1|	1	cAMP-dependent protein kinase catalytic subunit beta isoform 1 [Homo sapiens]	57329	57329	1	9	LFHRHSK	S6: Phospho	S34: Phospho	403.976	4	1611.89	-0.011426	8.73	1	29	35	R	G	1	2012-08-10-Look-iTRAQ-pST-17p5-230.1855.1855.4.dta - 403.97620|1059|204|895|204|362|735|1775|539	491	['PRKACB']	S34: Phospho	FALSE	['NA']	FALSE	0.00381679	HCD	No	N/A	N/A	N/A	N/A	1	8.73	1059	204	895	204	362	735	1775	539	1059	204	895
SLSNSNPDISGTPTSPDDEVR|T12: Phospho	93	gi|54112429|ref|NP_212132.2|	1	dedicator of cytokinesis 7 [Homo sapiens]	277353	277353	1	35	SLSNSNPDISGTPTSPDDEVR	T12: Phospho	T907: Phospho	858.065	3	2571.16	0.010003	35.01	1	896	916	R	S	0	2012-08-10-Look-iTRAQ-pST-9-700.3321.3321.3.dta - 858.06460|204|392|322|413|204|204|204|204	1930	['DOCK7']	T907: Phospho	FALSE	['NA']	FALSE	0	HCD	Yes	Yes	S15: Phospho	27.83	7.18	1	35.01	204	392	322	413	204	204	204	204	204	392	322
RSSLLNAK|S3: Phospho	171	gi|256600194|ref|NP_057424.3|; gi|256600196|ref|NP_001157858.1|; gi|256600198|ref|NP_001157859.1|; gi|256600200|ref|NP_001157860.1|; gi|256600202|ref|NP_001157861.1|	5	PDZ domain-containing guanine nucleotide exchange factor I isoform 2 [Homo sapiens]; PDZ domain-containing guanine nucleotide exchange factor I isoform 1 [Homo sapiens]; PDZ domain-containing guanine nucleotide exchange factor I isoform 3 [Homo sapiens]; PDZ domain-containing guanine nucleotide exchange factor I isoform 4 [Homo sapiens]; PDZ domain-containing guanine nucleotide exchange factor I …	213095; 214715; 201543; 200958; 189363	213095	1	19	RSSLLNAK	S3: Phospho	S1094: Phospho	526.304	3	1575.9	-0.007142	18.58	1	1092	1099	R	K	1	2012-08-10-Look-iTRAQ-pST-13-230.2401.2401.3.dta - 526.30410|1133|1272|1455|924|673|1250|682|2385	1071	['RAPGEF6']	S1094: Phospho	FALSE	['NA']	FALSE	0	HCD	No	N/A	N/A	N/A	N/A	1	18.58	1133	1272	1455	924	673	1250	682	2385	1133	1272	1455
KPSPQPSSPR|S3: Phospho; S8: Phospho	188	gi|150417989|ref|NP_001092872.1|	1	cyclin K isoform 1 [Homo sapiens]	74941	74941	1	17	KPSPQPSSPR	S3: Phospho; S8: Phospho	S324: Phospho; S329: Phospho	616.976	3	1847.92	-0.009868	17.48	1	322	331	K	Q	0	2012-08-10-Look-iTRAQ-pST-9-230.2169.2169.3.dta - 616.97610|979|481|1756|1395|763|1366|446|843	2255	['CCNK']	S324: Phospho; S329: Phospho				0.00773196	HCD	No	N/A	N/A	N/A	N/A	1	17.48	979	481	1756	1395	763	1366	446	843	979	481	1756
SCTPSPDQISHR|S5: Phospho	104	gi|27477136|ref|NP_064504.2|; gi|27477138|ref|NP_078901.3|	2	zinc finger antiviral protein isoform 1 [Homo sapiens]; zinc finger antiviral protein isoform 2 [Homo sapiens]	120474; 89679	120474	1	32	SCTPSPDQISHR	S5: Phospho	S275: Phospho	590.27	3	1767.79	-0.003322	31.68	1	271	282	R	A	0	2012-08-10-Look-iTRAQ-pST-9-230.2708.2708.3.dta - 590.27030|208|667|442|500|762|896|879|825	2069	['ZC3HAV1']	S275: Phospho				0	HCD	No	N/A	N/A	N/A	N/A	1	31.68	208	667	442	500	762	896	879	825	208	667	442
NAPAAVDEGSISPR|S12: Phospho	6	gi|51988900|ref|NP_000114.2|	1	XPG-complementing protein [Homo sapiens]	161649	161649	2	76	NAPAAVDEGSISPR	S12: Phospho	S384: Phospho	884.432	2	1766.85	-0.000614	35.18	1	373	386	R	T	0	2012-08-10-Look-iTRAQ-pST-9-230.3544.3544.2.dta - 884.43260|852|1737|2408|1856|1805|1615|1143|972	2067	['ERCC5']	S384: Phospho				0	CID	Yes	Yes	Yes	29.91	5.27	4	84.34	2085	4350	5413	4315	4085	4039	2936	3076	852	1737	2408
GSPTGGAQLLK|S2: Phospho	139	gi|57863269|ref|NP_055871.1|	1	ribosomal RNA processing 1 homolog B [Homo sapiens]	108502	108502	1	19	GSPTGGAQLLK	S2: Phospho	S513: Phospho	572.985	3	1715.94	-0.011371	18.66	1	512	522	R	R	0	2012-08-10-Look-iTRAQ-pST-13-230.3149.3149.3.dta - 572.98520|673|456|781|647|986|1341|1470|880	1312	['RRP1B']	S513: Phospho	FALSE	['NA']	FALSE	0.0097561	CID	Yes	Yes	Yes	14.55	4.11	1	18.66	673	456	781	647	986	1341	1470	880	673	456	781
AAGALGSASSGSMPNLAAR|S12: Phospho	84	gi|116063562|ref|NP_060497.3|	1	FERM domain containing 4A [Homo sapiens]	136948	136948	1	40	AAGALGSASSGSMPNLAAR	S12: Phospho	S800: Phospho	691.676	3	2072	0.002044	40	1	789	807	R	G	0	2012-08-10-Look-iTRAQ-pST-15-70.4053.4053.3.dta - 691.67580|431|215|989|686|1114|580|215|886	1917	['FRMD4A']	S800: Phospho	FALSE	['NA']	FALSE	0	HCD	Yes	Yes	Yes	20.08	19.92	1	40	431	215	989	686	1114	580	215	886	431	215	989
FIHQQPQSSSPVYGSSAK|S10: Phospho	135	gi|170932514|ref|NP_001074324.1|; gi|170932516|ref|NP_002850.2|	2	paxillin isoform 1 [Homo sapiens]; paxillin isoform 2 [Homo sapiens]	75377; 71783	75377	1	24	FIHQQPQSSSPVYGSSAK	S10: Phospho	S85: Phospho	659.838	4	2635.33	-0.004108	24.89	1	76	93	R	T	0	2012-08-10-Look-iTRAQ-pST-15-230.2688.2688.4.dta - 659.83740|208|330|208|208|208|208|603|208	1787	['PXN']	S85: Phospho	FALSE	['NA']	FALSE	0	HCD	No	N/A	N/A	N/A	N/A	1	24.89	208	330	208	208	208	208	603	208	208	330	208
TPGVLLPGAGGAAGFGMTSPPPPTSPSR|S27: Phospho	40	gi|56549696|ref|NP_056224.2|	1	E1A binding protein p400 [Homo sapiens]	386237	386237	7	31	TPGVLLPGAGGAAGFGMTSPPPPTSPSR	S27: Phospho	S323: Phospho	741.125	4	2960.48	-0.007721	26.22	1	297	324	R	T	0	2012-08-10-Look-iTRAQ-pST-22p5-30.3845.3845.4.dta - 741.12490|218|218|218|311|218|218|218|218	1289	['EP400']	S323: Phospho	FALSE	['NA']	FALSE	0	HCD	No	N/A	N/A	N/A	N/A	1	26.22	218	218	218	311	218	218	218	218	218	218	218
TMLLLSRSPEAQPK|S8: Phospho	51	gi|70166852|ref|NP_001102.2|; gi|70167113|ref|NP_001020278.1|	2	adenosine deaminase, RNA-specific isoform a [Homo sapiens]; adenosine deaminase, RNA-specific isoform d [Homo sapiens]	164458; 128141	164458	1	30	TMLLLSRSPEAQPK	S8: Phospho	S825: Phospho	565.565	4	2258.23	-0.002137	30.49	1	818	831	R	T	1	2012-08-10-Look-iTRAQ-pST-20-70.2880.2880.4.dta - 565.56510|848|699|698|861|500|625|894|665	1123	['ADAR']	S825: Phospho	FALSE	['NA']	FALSE	0	HCD	No	N/A	N/A	N/A	N/A	2	30.49	1056	1194	1222	1069	829	1000	1359	873	848	699	698
AAIPPPVYEEQDRPRSPTGPSNSFLANMGGTVAHK|S16: Phospho; M28: Oxidation	6	gi|14249678|ref|NP_116294.1|; gi|224549005|ref|NP_001139019.1|	2	RNA binding motif protein 17 [Homo sapiens]	56418	56418	8	60	AAIPPPVYEEQDRPRSPTGPSNSFLANMGGTVAHK	S16: Phospho; M28: Oxidation	S222: Phospho; M234: Oxidation	880.044	5	4395.19	-0.011852	19.05	1	207	241	K	I	1	2012-08-10-Look-iTRAQ-pST-20-230.2709.2709.5.dta - 880.04470|439|212|361|479|212|212|212|212	1155	['RBM17']	S222: Phospho	FALSE	['NA']	FALSE	0	CID	No	N/A	N/A	N/A	N/A	1	19.05	439	212	361	479	212	212	212	212	439	212	361
RGSNVALMLDVR|S3: Phospho; M8: Oxidation	38	gi|18375658|ref|NP_002823.2|; gi|18375660|ref|NP_542155.1|	2	protein tyrosine phosphatase, non-receptor type 7 isoform 1 [Homo sapiens]; protein tyrosine phosphatase, non-receptor type 7 isoform 2 [Homo sapiens]	45523; 49993	45523	6	58	RGSNVALMLDVR	S3: Phospho; M8: Oxidation	S44: Phospho; M49: Oxidation	577.633	3	1729.89	-0.007122	24.01	1	42	53	R	S	1	2012-08-10-Look-iTRAQ-pST-15-70.4277.4277.3.dta - 577.63250|718|1306|1672|1474|838|1401|1188|1066	1516	['PTPN7']	S44: Phospho	FALSE	['NA']	FALSE	0.00358423	HCD	No	N/A	N/A	N/A	N/A	5	58.26	2545	4456	4989	4325	4097	5119	4588	3229	718	1306	1672
TAPSSPLTSPSDTR|T8: Phospho	54	gi|38679909|ref|NP_060939.3|	1	testis expressed sequence 2 [Homo sapiens]	155142	155142	1	31	TAPSSPLTSPSDTR	T8: Phospho	T269: Phospho	900.94	2	1799.86	0.004912	31.15	1	262	275	K	S	0	2012-08-10-Look-iTRAQ-pST-9-230.3117.3117.2.dta - 900.94050|357|881|326|1752|1017|1720|1048|2138	2155	['TEX2']	T269: Phospho				0	CID	Yes	Yes	S5: Phospho	19.54	11.61	1	31.15	357	881	326	1752	1017	1720	1048	2138	357	881	326
STAPSAAASASASAAASSPAGGGAEALELLEHCGVCR|S9: Phospho	4	gi|5032179|ref|NP_005753.1|	1	tripartite motif-containing 28 protein [Homo sapiens]	103342	103342	3	117	STAPSAAASASASAAASSPAGGGAEALELLEHCGVCR	S9: Phospho	S41: Phospho	957.448	4	3825.76	0.001687	37.38	1	33	69	R	E	0	2012-08-10-Look-iTRAQ-pST-17p5-70.5028.5028.4.dta - 957.44770|217|217|217|217|217|217|307|217	1951	['TRIM28']	S41: Phospho	FALSE	['NA']	FALSE	0	HCD	Yes	Yes	S18: Phospho	37.27	0.11	2	46.86	217	217	217	217	217	217	307	217	217	217	217
SVSFGGFGWIDK|S1: Phospho	12	gi|156086724|ref|NP_055900.4|; gi|156086740|ref|NP_001093868.1|	2	RAP1 GTPase activating protein 2 isoform 1 [Homo sapiens]; RAP1 GTPase activating protein 2 isoform 2 [Homo sapiens]	96034; 93142	96034	1	52	SVSFGGFGWIDK	S1: Phospho	S7: Phospho	663.341	3	1987.01	-0.004235	52.34	1	7	18	R	T	0	2012-08-10-Look-iTRAQ-pST-20-230.3940.3940.3.dta - 663.34190|2542|3414|3492|5419|216|7339|7086|800	639	['RAP1GAP2']	S7: Phospho	FALSE	['NA']	FALSE	0	HCD	Yes	Yes	S3: Phospho	21.92	30.42	2	52.34	3133	4908	4695	7093	462	9633	8801	1014	2542	3414	3492
SLREDQQSFTGSR|S1: Phospho	117	gi|14702182|ref|NP_054865.2|; gi|118640875|ref|NP_115853.2|; gi|14702184|ref|NP_115852.1|	3	linker for activation of T cells family member 2 [Homo sapiens]	30165	30165	2	29	SLREDQQSFTGSR	S1: Phospho	S44: Phospho	632.302	3	1893.89	-0.003243	28.96	1	44	56	R	T	1	2012-08-10-Look-iTRAQ-pST-9-230.3728.3728.3.dta - 632.30270|208|1044|1565|1085|581|1388|1289|208	2343	['LAT2']	S44: Phospho				0	HCD	No	N/A	N/A	N/A	N/A	1	28.96	208	1044	1565	1085	581	1388	1289	208	208	1044	1565
ERSPSPSFR|S3: Phospho; S5: Phospho	282	gi|31543385|ref|NP_005008.2|	1	choline phosphate cytidylyltransferase 1 alpha [Homo sapiens]	51173	51173	1	11	ERSPSPSFR	S3: Phospho; S5: Phospho	S329: Phospho; S331: Phospho	509.56	3	1525.66	-0.004319	11.1	1	327	335	R	W	1	2012-08-10-Look-iTRAQ-pST-0-700.2319.2319.3.dta - 509.56030|206|676|675|791|304|661|206|466	1361	['PCYT1A']	S329: Phospho; S331: Phospho				0.00544218	HCD	No	N/A	N/A	N/A	N/A	1	11.1	206	676	675	791	304	661	206	466	206	676	675
ATSNVFAMFDQSQIQEFK|T2: Phospho; M8: Oxidation	7	gi|5453740|ref|NP_006462.1|; gi|15809016|ref|NP_291024.1|; gi|222144324|ref|NP_001138416.1|; gi|222144326|ref|NP_001138417.1|; gi|29568111|ref|NP_006088.2|; gi|31563524|ref|NP_852667.1|	6	myosin, light chain 12A, regulatory, non-sarcomeric [Homo sapiens]; myosin regulatory light chain MRCL2 isoform A [Homo sapiens]; myosin regulatory light chain MRCL2 isoform A [Homo sapiens]; myosin regulatory light chain MRCL2 isoform A [Homo sapiens]; myosin regulatory light chain 9 isoform a [Homo sapiens]; myosin regulatory light chain 9 isoform b [Homo sapiens]	24402; 24691; 24691; 24691; 24435; 17811	24402	9	60	ATSNVFAMFDQSQIQEFK	T2: Phospho; M8: Oxidation	T18: Phospho; M24: Oxidation	932.456	3	2794.35	-0.002782	60.27	1	17	34	R	E	0	2012-08-10-Look-iTRAQ-pST-20-230.4217.4217.3.dta - 932.45720|219|219|219|219|219|219|303|219	919	['MYL12A', 'MYL12B', 'MYL9']	T18: Phospho	FALSE	['NA']	FALSE	0	CID	Yes	Yes	M8: Oxidation; S12: Phospho	16.1	44.17	1	60.27	219	219	219	219	219	219	303	219	219	219	219
RHSWGPGK|S3: Phospho	178	gi|21493029|ref|NP_009131.2|; gi|31563330|ref|NP_006729.4|	2	A-kinase anchor protein 13 isoform 2 [Homo sapiens]; A-kinase anchor protein 13 isoform 1 [Homo sapiens]	368789; 369141	368789	1	17	RHSWGPGK	S3: Phospho	S1565: Phospho	403.968	4	1611.85	-0.004889	17.36	1	1563	1570	R	N	1	2012-08-10-Look-iTRAQ-pST-13-230.1910.1910.4.dta - 403.96890|578|521|1434|740|2290|1824|1545|1298	1136	['AKAP13']	S1565: Phospho	FALSE	['NA']	FALSE	0	HCD	No	N/A	N/A	N/A	N/A	1	17.36	578	521	1434	740	2290	1824	1545	1298	578	521	1434
AMVSPFHSPPSTPSSPGVR|M2: Oxidation; S4: Phospho; S8: Phospho	164	gi|217035154|ref|NP_443094.3|	1	RCSD domain containing 1 [Homo sapiens]	55105	55105	1	19	AMVSPFHSPPSTPSSPGVR	M2: Oxidation; S4: Phospho; S8: Phospho	M114: Oxidation; S116: Phospho; S120: Phospho	806.699	3	2417.08	-0.005166	19.33	1	113	131	K	S	0	2012-08-10-Look-iTRAQ-pST-13-230.3383.3383.3.dta - 806.69960|207|366|207|780|207|488|561|207	2008	['RCSD1']	S116: Phospho; S120: Phospho	FALSE	['NA']	FALSE	0	HCD	No	N/A	N/A	N/A	N/A	2	19.33	417	576	486	1242	651	790	771	417	207	366	207
MSGFIYQGK|M1: Oxidation; S2: Phospho	80	gi|4505573|ref|NP_003890.1|; gi|166064034|ref|NP_001106983.1|; gi|166064036|ref|NP_001106984.1|; gi|166064038|ref|NP_001106985.1|; gi|22027525|ref|NP_004831.1|; gi|22027528|ref|NP_663788.1|	6	PAK-interacting exchange factor beta isoform a [Homo sapiens]; PAK-interacting exchange factor beta isoform c [Homo sapiens]; PAK-interacting exchange factor beta isoform d [Homo sapiens]; Rac/Cdc42 guanine nucleotide exchange factor 6 [Homo sapiens]; PAK-interacting exchange factor beta isoform b [Homo sapiens]	90700; 106686; 101040; 105733; 104446	90700	8	22	MSGFIYQGK	M1: Oxidation; S2: Phospho	M339: Oxidation; S340: Phospho	578.96	3	1733.87	-0.007818	18.15	1	339	347	R	L	0	2012-08-10-Look-iTRAQ-pST-17p5-230.2869.2869.3.dta - 578.96080|1756|2740|2665|3113|2951|3365|2910|2918	600	['ARHGEF7', 'ARHGEF6']	S340: Phospho	FALSE	['NA']	FALSE	0	CID	Yes	Yes	Yes	13.44	4.71	9	24.22	11600	19115	17037	19564	18980	19545	18464	17225	1756	2740	2665
RLSIIGPTSR|S3: Phospho	186	gi|85838511|ref|NP_006600.3|	1	mitogen-activated protein kinase kinase kinase 2 [Homo sapiens]	81599	81599	1	19	RLSIIGPTSR	S3: Phospho	S153: Phospho	495.28	3	1482.82	-0.003109	18.65	1	151	160	K	D	1	2012-08-10-Look-iTRAQ-pST-15-70.3221.3221.3.dta - 495.27990|212|492|212|829|371|278|566|212	1180	['MAP3K2']	S153: Phospho	TRUE	['sp|Q9Y2U5|M3K2_HUMAN Mitogen-activated protein kinase kinase kinase 2 OS=Homo sapiens GN=MAP3K2 PE=1 SV=2']	TRUE	0.00289855	HCD	No	N/A	N/A	N/A	N/A	1	18.65	212	492	212	829	371	278	566	212	212	492	212
EGGRTPTLEILK|T5: Phospho	18	gi|4503687|ref|NP_001996.1|; gi|219842230|ref|NP_001137255.1|; gi|219842233|ref|NP_001137256.1|; gi|219842236|ref|NP_001137257.1|	4	feline sarcoma oncogene isoform 1 [Homo sapiens]; feline sarcoma oncogene isoform 2 [Homo sapiens]; feline sarcoma oncogene isoform 3 [Homo sapiens]; feline sarcoma oncogene isoform 4 [Homo sapiens]	106291; 98548; 97657; 89915	106291	2	47	EGGRTPTLEILK	T5: Phospho	T421: Phospho	501.283	4	2001.11	-0.011035	29.77	1	417	428	R	S	1	2012-08-10-Look-iTRAQ-pST-15-230.3345.3345.4.dta - 501.28220|207|207|636|207|207|631|207|337	1426	['FES']	T421: Phospho	TRUE	['sp|P07332|FES_HUMAN Tyrosine-protein kinase Fes/Fps OS=Homo sapiens GN=FES PE=1 SV=3']	TRUE	0	CID	Yes	Yes	Yes	9.08	20.69	1	29.77	207	207	636	207	207	631	207	337	207	207	636
SSSPTSYWK|S3: Phospho	121	gi|28416946|ref|NP_510880.2|; gi|42794779|ref|NP_976063.1|	2	myosin 18A isoform a [Homo sapiens]; myosin 18A isoform b [Homo sapiens]	282233; 279142	282233	1	10	SSSPTSYWK	S3: Phospho	S2007: Phospho	577.623	3	1729.85	-0.007068	11.18	1	2005	2013	K	S	0	2012-08-10-Look-iTRAQ-pST-13-700.2987.2987.3.dta - 577.62260|1053|505|1462|1065|1098|1441|1462|597	636	['MYO18A']	S2007: Phospho	FALSE	['NA']	FALSE	0.0097561	HCD	No	N/A	N/A	N/A	N/A	1	11.18	1053	505	1462	1065	1098	1441	1462	597	1053	505	1462
KPSFSK|S3: Phospho	42	gi|5803145|ref|NP_006779.1|	1	ralA binding protein 1 [Homo sapiens]	98622	98622	2	51	KPSFSK	S3: Phospho	S116: Phospho	422.248	4	1684.97	-0.006308	22.87	1	114	119	K	K	0	2012-08-10-Look-iTRAQ-pST-15-230.2390.2390.4.dta - 422.24790|1957|3111|4071|5980|4649|4821|5545|1671	881	['RALBP1']	S116: Phospho	FALSE	['NA']	FALSE	0	HCD	No	N/A	N/A	N/A	N/A	1	22.87	1957	3111	4071	5980	4649	4821	5545	1671	1957	3111	4071
SPTEDFR|S1: Phospho	64	gi|118722349|ref|NP_976324.2|	1	RNA binding motif protein 12B [Homo sapiens]	131149	131149	3	56	SPTEDFR	S1: Phospho	S638: Phospho	618.284	2	1234.55	-0.000524	17.84	1	638	644	R	Q	0	2012-08-10-Look-iTRAQ-pST-0-700.2984.2984.2.dta - 618.28390|1675|2718|6136|4752|5301|6499|2527|2260	775	['RBM12B']	S638: Phospho				0.00178891	HCD	No	N/A	N/A	N/A	N/A	2	17.84	2883	4491	11265	7477	10505	11927	5989	4907	1675	2718	6136
AVRLPTWSLMPASR|T6: Phospho; S8: Phospho; M10: Oxidation	36	gi|169163210|ref|XP_001717396.1|; gi|169163653|ref|XP_001717499.1|; gi|169164192|ref|XP_001720041.1|	3	PREDICTED: similar to tudor domain containing 1 [Homo sapiens]	290756; 290772; 290772	290756	1	8	AVRLPTWSLMPASR	T6: Phospho; S8: Phospho; M10: Oxidation	T51: Phospho; S53: Phospho; M55: Oxidation	689.006	3	2063.99	0.002147	8.01	1	46	59	K	T	1	2012-08-10-Look-iTRAQ-pST-22p5-230.4461.4461.3.dta - 689.00730|219|219|498|219|219|526|219|335	764	['unresolved: gi|169163210|ref|XP_001717396.1|', 'unresolved: gi|169163653|ref|XP_001717499.1|', 'unresolved: gi|169164192|ref|XP_001720041.1|']	T51: Phospho; S53: Phospho	FALSE	['NA']	FALSE	0	HCD	No	N/A	N/A	N/A	N/A	1	8.01	219	219	498	219	219	526	219	335	219	219	498
SSVGWDATEDLR|S2: Phospho	17	gi|7661882|ref|NP_055697.1|; gi|261399907|ref|NP_001007232.2|; gi|261399909|ref|NP_001159748.1|; gi|261399911|ref|NP_001159749.1|	4	Rho GTPase activating protein 25 isoform b [Homo sapiens]; Rho GTPase activating protein 25 isoform a [Homo sapiens]; Rho GTPase activating protein 25 isoform c [Homo sapiens]; Rho GTPase activating protein 25 isoform d [Homo sapiens]	87861; 89792; 87932; 84944	87861	1	62	SSVGWDATEDLR	S2: Phospho	S372: Phospho	573.934	3	1718.78	-0.000925	62.41	1	371	382	R	I	0	2012-08-10-Look-iTRAQ-pST-11-230.5350.5350.3.dta - 573.93460|2955|967|561|6595|1776|2495|9002|2594	1828	['ARHGAP25']	S372: Phospho	FALSE	['NA']	FALSE	0	HCD	Yes	Yes	Yes	39.42	22.99	6	62.41	12868	5314	2663	24507	5556	11376	31160	6424	2955	967	561
TLNQLGTPQDSPELR|S11: Phospho	21	gi|170932494|ref|NP_003560.2|	1	syntaxin 7 [Homo sapiens]	34170	34170	1	71	TLNQLGTPQDSPELR	S11: Phospho	S45: Phospho	685.013	3	2052.02	-0.001909	71.18	1	35	49	R	Q	0	2012-08-10-Look-iTRAQ-pST-13-230.3815.3815.3.dta - 685.01390|457|566|780|853|1146|867|793|642	1829	['STX7']	S45: Phospho	FALSE	['NA']	FALSE	0	HCD	Yes	Yes	Yes	22.75	48.43	1	71.18	457	566	780	853	1146	867	793	642	457	566	780
VPDSPSPAPSLEEGR|S4: Phospho; S6: Phospho	207	gi|259490226|ref|NP_542937.2|	1	dachshund homolog 1 isoform a [Homo sapiens]	84202	84202	2	22	VPDSPSPAPSLEEGR	S4: Phospho; S6: Phospho	S441: Phospho; S443: Phospho	667.968	3	2000.88	0.003082	19.34	1	438	452	R	R	0	2012-08-10-Look-iTRAQ-pST-0-700.4200.4200.3.dta - 667.96830|210|525|2746|546|788|930|210|585	2510	['DACH1']	S441: Phospho; S443: Phospho				0.00190476	HCD	No	N/A	N/A	N/A	N/A	1	19.34	210	525	2746	546	788	930	210	585	210	525	2746
VVPEDGSPEKR|S7: Phospho	169	gi|41152097|ref|NP_005079.2|	1	DNA segment on chromosome X and Y (unique) 155 expressed sequence isoform 1 [Homo sapiens]	101086	101086	1	19	VVPEDGSPEKR	S7: Phospho	S537: Phospho	634.336	3	1899.99	-0.005661	19.49	1	531	541	R	C	1	2012-08-10-Look-iTRAQ-pST-9-700.2461.2461.3.dta - 634.33620|1420|2089|3733|2043|2034|2907|1353|1684	1244	['AKAP17A']	S537: Phospho	FALSE	['NA']	FALSE	0	HCD	No	N/A	N/A	N/A	N/A	2	22.29	1634	2398	4446	2629	2478	3368	1849	2032	1420	2089	3733
QAHSLRGSCLF|S4: Phospho; S8: Phospho	213	gi|151301137|ref|NP_110394.3|	1	AT-hook transcription factor [Homo sapiens]	171053	171053	1	13	QAHSLRGSCLF	S4: Phospho; S8: Phospho	S1432: Phospho; S1436: Phospho	580.591	3	1738.76	-0.005997	12.88	1	1429	1439	R	-	1	2012-08-10-Look-iTRAQ-pST-13-230.4346.4346.3.dta - 580.59170|1768|956|4014|647|2242|2530|2216|3171	1349	['AKNA']	S1432: Phospho; S1436: Phospho	FALSE	['NA']	FALSE	0.00268817	HCD	No	N/A	N/A	N/A	N/A	1	12.88	1768	956	4014	647	2242	2530	2216	3171	1768	956	4014
SYSPDGK|S3: Phospho	20	gi|21626466|ref|NP_061322.2|; gi|62750354|ref|NP_954659.1|	2	matrin 3 [Homo sapiens]	115460	115460	2	68	SYSPDGK	S3: Phospho	S598: Phospho	481.241	3	1440.71	-0.010249	8.54	1	596	602	R	E	0	2012-08-10-Look-iTRAQ-pST-9-700.2195.2195.3.dta - 481.24110|1529|988|3756|2189|1998|2451|1047|1346	594	['MATR3']	S598: Phospho	FALSE	['NA']	FALSE	0.00274725	HCD	No	N/A	N/A	N/A	N/A	1	8.54	1529	988	3756	2189	1998	2451	1047	1346	1529	988	3756
RESSFQPEAGFGR|S3: Phospho	97	gi|13273315|ref|NP_076920.1|	1	homeobox B4 [Homo sapiens]	31636	31636	1	34	RESSFQPEAGFGR	S3: Phospho	S46: Phospho	617.96	3	1850.86	-0.003346	34.8	1	44	56	R	R	1	2012-08-10-Look-iTRAQ-pST-11-230.4101.4101.3.dta - 617.96060|517|994|456|1809|387|1290|747|771	2051	['HOXB4']	S46: Phospho	FALSE	['NA']	FALSE	0	HCD	No	N/A	N/A	N/A	N/A	1	34.8	517	994	456	1809	387	1290	747	771	517	994	456
ELSSPISPK|S7: Phospho	156	gi|95147555|ref|NP_002364.5|	1	microtubule-associated protein 1A [Homo sapiens]	371272	371272	1	21	ELSSPISPK	S7: Phospho	S2022: Phospho	549.302	3	1644.89	-0.01011	21.41	1	2016	2024	K	S	0	2012-08-10-Look-iTRAQ-pST-13-230.3376.3376.3.dta - 549.30280|766|653|1471|629|424|839|703|438	1208	['MAP1A']	S2022: Phospho	FALSE	['NA']	FALSE	0	HCD	Yes	Yes	Yes	19.87	1.54	1	21.41	766	653	1471	629	424	839	703	438	766	653	1471
LDSQPQETSPELPR|S9: Phospho	24	gi|5729828|ref|NP_006691.1|; gi|219879806|ref|NP_001137378.1|	2	TRAF-type zinc finger domain containing 1 [Homo sapiens]	73222	73222	3	52	LDSQPQETSPELPR	S9: Phospho	S415: Phospho	990.981	2	1979.95	-0.003627	33.59	1	407	420	R	R	0	2012-08-10-Look-iTRAQ-pST-9-700.3440.3440.2.dta - 990.97990|1288|2153|1369|1304|1234|1942|2564|2612	1485	['TRAFD1']	S415: Phospho	FALSE	['NA']	FALSE	0	CID	Yes	Yes	Yes	26.66	6.93	2	48.14	1497	2624	1667	1513	1704	2775	3341	3261	1288	2153	1369
STELLIR|T2: Phospho	207	gi|4504279|ref|NP_002098.1|; gi|10440560|ref|NP_066298.1|; gi|183076548|ref|NP_001116847.1|; gi|188528667|ref|NP_001013721.2|; gi|21071021|ref|NP_003521.2|; gi|31742503|ref|NP_066403.2|; gi|4504281|ref|NP_003520.1|; gi|4504285|ref|NP_003522.1|; gi|4504287|ref|NP_003523.1|; gi|4504289|ref|NP_003524.1|; gi|4504291|ref|NP_003525.1|; gi|4504293|ref|NP_003526.1|; gi|4504295|ref|NP_003527.1|; gi|450429…	17	H3 histone, family 3A [Homo sapiens]; histone cluster 1, H3f [Homo sapiens]; histone cluster 2, H3d [Homo sapiens]; histone H3-like [Homo sapiens]; histone cluster 1, H3d [Homo sapiens]; histone cluster 2, H3c [Homo sapiens]; histone cluster 1, H3a [Homo sapiens]; histone cluster 1, H3c [Homo sapiens]; histone cluster 1, H3e [Homo sapiens]; histone cluster 1, H3i [Homo sapiens]; H3 histone family…	19634; 19767; 19694; 18969; 19767; 19694; 19767; 19767; 19767; 19767; 19767; 19767; 19767; 19767; 19871; 19694	19634	1	12	STELLIR	T2: Phospho	T59: Phospho	608.333	2	1214.66	-0.006234	12.4	1	58	64	K	K	0	2012-08-10-Look-iTRAQ-pST-9-700.3732.3732.2.dta - 608.33290|2347|2149|4604|3479|7430|5966|2786|7813	377	['H3F3A', 'HIST1H3F', 'HIST2H3D', 'H3F3C', 'HIST1H3D', 'HIST2H3C', 'HIST1H3A', 'HIST1H3C', 'HIST1H3E', 'HIST1H3I', 'HIST1H3G', 'HIST1H3J', 'HIST1H3H', 'HIST1H3B', 'HIST3H3', 'H3F3B', 'HIST2H3A']	T59: Phospho	FALSE	['NA']	FALSE	0	HCD	No	N/A	N/A	N/A	N/A	1	12.4	2347	2149	4604	3479	7430	5966	2786	7813	2347	2149	4604
LCAGIMITASHNPKQDNGYK|M6: Oxidation; S10: Phospho	29	gi|63055049|ref|NP_060760.2|	1	phosphoglucomutase 2 [Homo sapiens]	83660	83660	5	58	LCAGIMITASHNPKQDNGYK	M6: Oxidation; S10: Phospho	M161: Oxidation; S165: Phospho	646.135	5	3225.64	-0.006443	11.42	1	156	175	K	V	1	2012-08-10-Look-iTRAQ-pST-17p5-230.2777.2777.5.dta - 646.13530|204|519|468|353|337|402|645|204	1266	['PGM2']	S165: Phospho	FALSE	['NA']	FALSE	0.00420168	HCD	No	N/A	N/A	N/A	N/A	1	11.42	204	519	468	353	337	402	645	204	204	519	468
RVSLVGADDLR|S3: Phospho	58	gi|45827729|ref|NP_056171.2|; gi|45827731|ref|NP_874365.2|	2	scribble isoform b [Homo sapiens]; scribble isoform a [Homo sapiens]	190091; 193507	190091	2	44	RVSLVGADDLR	S3: Phospho	S1378: Phospho	528.951	3	1583.83	-0.002976	31.91	1	1376	1386	K	K	1	2012-08-10-Look-iTRAQ-pST-13-230.3619.3619.3.dta - 528.95150|207|207|207|390|207|551|451|207	1083	['SCRIB']	S1378: Phospho	FALSE	['NA']	FALSE	0	HCD	No	N/A	N/A	N/A	N/A	1	31.91	207	207	207	390	207	551	451	207	207	207	207
ASEDTTSGSPPKK|S9: Phospho	175	gi|5729730|ref|NP_006586.1|; gi|219283152|ref|NP_001136402.1|; gi|219283155|ref|NP_001136403.1|	3	apoptosis inhibitor 5 isoform b [Homo sapiens]; apoptosis inhibitor 5 isoform a [Homo sapiens]; apoptosis inhibitor 5 isoform c [Homo sapiens]	70462; 72391; 62554	70462	1	19	ASEDTTSGSPPKK	S9: Phospho	S464: Phospho	575.057	4	2296.21	-0.008441	18.92	1	456	468	R	S	1	2012-08-10-Look-iTRAQ-pST-9-700.2092.2092.4.dta - 575.05740|678|389|1364|718|416|914|526|403	1767	['API5']	S464: Phospho	FALSE	['NA']	FALSE	0	HCD	No	N/A	N/A	N/A	N/A	2	18.92	1096	598	2222	1399	1062	1975	735	915	678	389	1364
TVAISDAAQLPHDYCTTPGGTLFSTTPGGTR|T26: Phospho	19	gi|4758260|ref|NP_004087.1|	1	eukaryotic translation initiation factor 4E binding protein 2 [Homo sapiens]	14262	14262	2	50	TVAISDAAQLPHDYCTTPGGTLFSTTPGGTR	T26: Phospho	T46: Phospho	1192.91	3	3575.69	0.005461	39.23	1	21	51	R	I	0	2012-08-10-Look-iTRAQ-pST-20-230.3510.3510.3.dta - 1192.90980|210|210|1249|210|210|844|210|210	1069	['EIF4EBP2']	T46: Phospho	FALSE	['NA']	FALSE	0	HCD	No	N/A	N/A	N/A	N/A	2	50.26	427	427	1730	427	427	1061	427	427	210	210	1249
RPSVFER|S3: Phospho	6	gi|116008442|ref|NP_055885.3|	1	zinc finger CCCH-type containing 13 [Homo sapiens]	222881	222881	5	84	RPSVFER	S3: Phospho	S25: Phospho	425.556	3	1273.65	-0.003754	21	1	23	29	R	L	0	2012-08-10-Look-iTRAQ-pST-11-230.2796.2796.3.dta - 425.55590|1126|738|636|1707|361|1552|1281|632	824	['ZC3H13']	S25: Phospho	FALSE	['NA']	FALSE	0.00660066	HCD	No	N/A	N/A	N/A	N/A	1	21	1126	738	636	1707	361	1552	1281	632	1126	738	636
KEPAITSQNSPEAR|S10: Phospho	66	gi|5803191|ref|NP_006747.1|; gi|239749424|ref|XP_002347041.1|; gi|45439355|ref|NP_958845.1|	3	transcription elongation factor A 1 isoform 1 [Homo sapiens]; PREDICTED: hypothetical protein XP_002347041 [Homo sapiens]; transcription elongation factor A 1 isoform 2 [Homo sapiens]	44443; 41824; 41530	44443	2	42	KEPAITSQNSPEAR	S10: Phospho	S100: Phospho	739.387	3	2215.15	-0.006567	18.17	1	91	104	K	E	1	2012-08-10-Look-iTRAQ-pST-9-230.2796.2796.3.dta - 739.38730|208|208|774|655|545|481|208|208	2715	['TCEA1', 'unresolved: gi|239749424|ref|XP_002347041.1|']	S100: Phospho				0.008	HCD	No	N/A	N/A	N/A	N/A	2	41.86	425	425	1462	1019	1396	813	425	513	208	208	774
SLSPILPGR|S3: Phospho	76	gi|41327769|ref|NP_056133.2|; gi|195972857|ref|NP_001124427.1|	2	Rho/Rac guanine nucleotide exchange factor 18 isoform a [Homo sapiens]; Rho/Rac guanine nucleotide exchange factor 18 isoform b [Homo sapiens]	133628; 151842	133628	3	45	SLSPILPGR	S3: Phospho	S945: Phospho	662.369	2	1322.73	-0.00285	44.31	1	943	951	R	H	0	2012-08-10-Look-iTRAQ-pST-17p5-70.3584.3584.2.dta - 662.36900|1328|3976|4623|3249|3317|5316|3030|3329	745	['ARHGEF18']	S945: Phospho	FALSE	['NA']	FALSE	0	HCD	No	N/A	N/A	N/A	N/A	3	44.56	3122	8106	9658	6920	6407	12459	5880	6830	1328	3976	4623
GYTSDSEVYTDHGRPGK|S4: Phospho	48	gi|4758416|ref|NP_004184.1|	1	golgi-specific brefeldin A resistant guanine nucleotide exchange factor 1 [Homo sapiens]	236963	236963	2	34	GYTSDSEVYTDHGRPGK	S4: Phospho	S1318: Phospho	640.061	4	2556.21	0.005092	24.24	1	1315	1331	R	I	0	2012-08-10-Look-iTRAQ-pST-13-700.2430.2430.4.dta - 640.06110|209|964|803|896|311|981|209|778	1269	['GBF1']	S1318: Phospho	FALSE	['NA']	FALSE	0	HCD	Yes	Yes	T3: Phospho	16.49	7.75	1	24.24	209	964	803	896	311	981	209	778	209	964	803
IAFDAESEPNNSSGSMEK|S15: Phospho; M16: Oxidation	37	gi|18765700|ref|NP_055615.8|	1	engulfment and cell motility 1 isoform 1 [Homo sapiens]	100640	100640	2	36	IAFDAESEPNNSSGSMEK	S15: Phospho; M16: Oxidation	S344: Phospho; M345: Oxidation	873.069	3	2616.19	-0.002629	36.48	1	330	347	R	R	0	2012-08-10-Look-iTRAQ-pST-11-700.3256.3256.3.dta - 873.06820|207|392|378|207|207|207|460|398	1493	['ELMO1']	S344: Phospho	FALSE	['NA']	FALSE	0	CID	Yes	Yes	Yes	10.49	25.99	3	43.12	1041	812	1459	627	627	879	880	818	207	392	378
GGNFGFGDSR|S9: Phospho	48	gi|4504447|ref|NP_002128.1|; gi|14043072|ref|NP_112533.1|	2	heterogeneous nuclear ribonucleoprotein A2/B1 isoform A2 [Homo sapiens]; heterogeneous nuclear ribonucleoprotein A2/B1 isoform B1 [Homo sapiens]	41212; 43548	41212	2	49	GGNFGFGDSR	S9: Phospho	S200: Phospho	699.308	2	1396.61	-0.005648	30.02	1	192	201	R	G	0	2012-08-10-Look-iTRAQ-pST-13-230.3402.3402.2.dta - 699.30920|2164|2465|2920|5015|2933|3461|3366|1603	821	['HNRNPA2B1']	S200: Phospho	FALSE	['NA']	FALSE	0	HCD	No	N/A	N/A	N/A	N/A	2	49.11	2636	3005	3774	5714	3373	4254	3824	1925	2164	2465	2920
MEVTGVSAPTVTVFISSSLNTFRSEKR|M1: Oxidation; S7: Phospho; T10: Phospho	58	gi|50428925|ref|NP_001272.2|	1	cytoskeleton associated protein 1 [Homo sapiens]	32157	32157	1	17	MEVTGVSAPTVTVFISSSLNTFRSEKR	M1: Oxidation; S7: Phospho; T10: Phospho	M1: Oxidation; S7: Phospho; T10: Phospho	746.383	5	3726.86	0.023967	16.83	1	1	27	-	Y	2	2012-08-10-Look-iTRAQ-pST-20-110.3018.3018.5.dta - 746.38480|303|205|205|461|205|205|205|205	1358	['TBCB']	S7: Phospho; T10: Phospho	FALSE	['NA']	FALSE	0	CID	No	N/A	N/A	N/A	N/A	1	16.83	303	205	205	461	205	205	205	205	303	205	205
SLSVPDSGR|S3: Phospho	73	gi|92087055|ref|NP_072096.2|	1	PERQ amino acid rich, with GYF domain 1 [Homo sapiens]	130863	130863	1	39	SLSVPDSGR	S3: Phospho	S638: Phospho	651.322	2	1300.63	-0.003279	38.95	1	636	644	R	L	0	2012-08-10-Look-iTRAQ-pST-9-230.3652.3652.2.dta - 651.32240|2877|3309|2913|5265|3951|4416|4285|3271	1082	['GIGYF1']	S638: Phospho				0	HCD	No	N/A	N/A	N/A	N/A	1	38.95	2877	3309	2913	5265	3951	4416	4285	3271	2877	3309	2913
KASPEAASTPR|S3: Phospho	36	gi|4505903|ref|NP_002666.1|; gi|109637788|ref|NP_150247.2|; gi|15451765|ref|NP_150242.1|; gi|15451775|ref|NP_150249.1|; gi|15451779|ref|NP_150252.1|; gi|67089149|ref|NP_150241.2|; gi|67089154|ref|NP_150250.2|; gi|67089157|ref|NP_150243.2|; gi|67089160|ref|NP_150253.2|	9	promyelocytic leukemia protein isoform 6 [Homo sapiens]; promyelocytic leukemia protein isoform 5 [Homo sapiens]; promyelocytic leukemia protein isoform 9 [Homo sapiens]; promyelocytic leukemia protein isoform 7 [Homo sapiens]; promyelocytic leukemia protein isoform 10 [Homo sapiens]; promyelocytic leukemia protein isoform 1 [Homo sapiens]; promyelocytic leukemia protein isoform 8 [Homo sapiens];…	78459; 70143; 99010; 53172; 72867; 108573; 54194; 75603; 93418	78459	2	57	KASPEAASTPR	S3: Phospho	S403: Phospho	601.662	3	1801.95	0.010673	8.69	1	401	411	K	D	1	2012-08-10-Look-iTRAQ-pST-9-700.1881.1881.3.dta - 601.66270|4776|5684|9474|10311|7379|11257|4845|6417	1086	['PML']	S403: Phospho	FALSE	['NA']	FALSE	0.00278552	HCD	No	N/A	N/A	N/A	N/A	2	24.12	4984	5892	9856	10781	7743	11987	5053	6625	4776	5684	9474
KVFSPVIR|S4: Phospho	97	gi|112421108|ref|NP_055940.3|	1	capicua homolog [Homo sapiens]	184671	184671	2	36	KVFSPVIR	S4: Phospho	S496: Phospho	545.324	3	1632.96	-0.006257	20.9	1	493	500	R	S	1	2012-08-10-Look-iTRAQ-pST-15-70.3787.3787.3.dta - 545.32430|1885|2378|2724|2031|2454|2531|2439|2481	1384	['CIC']	S496: Phospho	FALSE	['NA']	FALSE	0.0031348	HCD	No	N/A	N/A	N/A	N/A	1	20.9	1885	2378	2724	2031	2454	2531	2439	2481	1885	2378	2724
NQPQRPESFLFR|S8: Phospho	221	gi|14249428|ref|NP_116162.1|	1	leucine-rich repeats and calponin homology (CH) domain containing 3 [Homo sapiens]	86662	86662	1	15	NQPQRPESFLFR	S8: Phospho	S611: Phospho	634.987	3	1901.95	-0.00511	15	1	604	615	R	A	0	2012-08-10-Look-iTRAQ-pST-15-70.4825.4825.3.dta - 634.98800|856|1505|838|2696|1825|2052|1881|1666	1753	['LRCH3']	S611: Phospho	FALSE	['NA']	FALSE	0.00240964	HCD	No	N/A	N/A	N/A	N/A	1	15	856	1505	838	2696	1825	2052	1881	1666	856	1505	838
FICVTPTTCSNTIDLPMSPR|M17: Oxidation; S18: Phospho	5	gi|21618338|ref|NP_003141.2|; gi|21618340|ref|NP_644805.1|	2	signal transducer and activator of transcription 3 isoform 2 [Homo sapiens]; signal transducer and activator of transcription 3 isoform 1 [Homo sapiens]	103325; 103412	103325	5	57	FICVTPTTCSNTIDLPMSPR	M17: Oxidation; S18: Phospho	M725: Oxidation; S726: Phospho	904.092	3	2709.25	0.000763	57.25	1	709	728	K	T	0	2012-08-10-Look-iTRAQ-pST-20-70.3547.3547.3.dta - 904.09390|402|2866|2353|1871|1352|1261|1132|1048	1233	['STAT3']	S726: Phospho	FALSE	['NA']	FALSE	0	CID	Yes	Yes	Yes	44.98	12.27	6	57.25	626	3501	2961	2095	1719	1807	1356	1272	402	2866	2353
LNQPGTPTR|T6: Phospho	109	gi|13489054|ref|NP_109587.1|	1	mitogen-activated protein kinase kinase 2 [Homo sapiens]	52286	52286	3	31	LNQPGTPTR	T6: Phospho	T394: Phospho	684.351	2	1366.69	-0.003301	30.5	1	389	397	R	T	0	2012-08-10-Look-iTRAQ-pST-9-230.2359.2359.2.dta - 684.35150|1351|2355|1921|2936|3032|3853|3768|2249	1222	['MAP2K2']	T394: Phospho				0	HCD	No	N/A	N/A	N/A	N/A	3	30.5	1772	3775	2492	4505	4472	5459	5360	3711	1351	2355	1921
SAGPQSQLLASVIAEKSR|S17: Phospho	58	gi|9257180|ref|NP_059517.1|; gi|89276787|ref|NP_059516.2|; gi|89276790|ref|NP_059518.2|; gi|9257190|ref|NP_059522.1|; gi|9257192|ref|NP_001608.1|	5	adducin 2 isoform c [Homo sapiens]; adducin 2 isoform b [Homo sapiens]; adducin 2 isoform d [Homo sapiens]; adducin 2 isoform e [Homo sapiens]; adducin 2 isoform a [Homo sapiens]	59529; 71762; 32388; 84805; 98904	59529	1	31	SAGPQSQLLASVIAEKSR	S17: Phospho	S222: Phospho	633.35	4	2529.38	-0.00803	30.78	1	206	223	K	S	1	2012-08-10-Look-iTRAQ-pST-17p5-230.3584.3584.4.dta - 633.34900|210|210|210|348|268|210|210|210	1102	['unresolved: gi|9257180|ref|NP_059517.1|', 'ADD2', 'unresolved: gi|89276790|ref|NP_059518.2|']	S222: Phospho	FALSE	['NA']	FALSE	0	CID	Yes	Yes	Yes	23.71	7.07	1	30.78	210	210	210	348	268	210	210	210	210	210	210
KGAGDGSDEEVDGK|S7: Phospho	1	gi|12667788|ref|NP_002464.1|	1	myosin, heavy polypeptide 9, non-muscle [Homo sapiens]	290921	290921	2	91	KGAGDGSDEEVDGK	S7: Phospho	S1943: Phospho	589.797	4	2355.17	-0.011717	26.36	1	1937	1950	R	A	1	2012-08-10-Look-iTRAQ-pST-17p5-700.1926.1926.4.dta - 589.79820|209|510|284|209|409|445|209|1024	593	['MYH9']	S1943: Phospho	FALSE	['NA']	FALSE	0	HCD	No	N/A	N/A	N/A	N/A	2	26.36	417	902	492	726	617	653	417	1544	209	510	284
SFHFDPLSSGSR|S11: Phospho	35	gi|41152072|ref|NP_056272.2|	1	zinc finger, DHHC domain containing 5 [Homo sapiens]	88580	88580	2	34	SFHFDPLSSGSR	S11: Phospho	S425: Phospho	574.271	3	1719.79	-0.002688	34.06	1	415	426	K	S	0	2012-08-10-Look-iTRAQ-pST-20-110.3087.3087.3.dta - 574.27120|691|214|1524|214|1431|2003|1451|1760	803	['ZDHHC5']	S425: Phospho	FALSE	['NA']	FALSE	0	HCD	Yes	Yes	S8: Phospho	14.31	19.75	2	34.06	1081	429	2453	549	2608	3477	2452	2649	691	214	1524
RNSVVEIESSQGQR|S3: Phospho	72	gi|23308733|ref|NP_056470.1|	1	zinc finger protein 337 [Homo sapiens]	110452	110452	1	39	RNSVVEIESSQGQR	S3: Phospho	S148: Phospho	658.327	3	1971.97	-0.008173	39	1	146	159	R	E	1	2012-08-10-Look-iTRAQ-pST-9-230.3012.3012.3.dta - 658.32750|406|213|411|213|213|213|314|213	2501	['ZNF337']	S148: Phospho				0	HCD	Yes	Yes	Yes	31.85	7.15	1	39	406	213	411	213	213	213	314	213	406	213	411
NVLTEESVVR|S7: Phospho	79	gi|4502509|ref|NP_001727.1|	1	complement component 5 receptor 1 [Homo sapiens]	43763	43763	2	51	NVLTEESVVR	S7: Phospho	S327: Phospho	765.396	2	1528.78	-0.003024	48.99	1	321	330	R	E	0	2012-08-10-Look-iTRAQ-pST-0-700.4463.4463.2.dta - 765.39600|1092|5085|210|2848|3393|1261|6062|15127	1364	['C5AR1']	S327: Phospho				0	HCD	Yes	Yes	Yes	37.2	11.79	2	51.21	1301	5294	419	3057	3602	1470	6271	15850	1092	5085	210
EPESPPASAPIPLFGADTIGQR|S4: Phospho	20	gi|224028289|ref|NP_001138890.1|	1	tetratricopeptide repeat domain 28 [Homo sapiens]	309158	309158	1	48	EPESPPASAPIPLFGADTIGQR	S4: Phospho	S28: Phospho	878.773	3	2633.3	-0.008142	48.27	1	25	46	R	S	0	2012-08-10-Look-iTRAQ-pST-17p5-230.4196.4196.3.dta - 878.77260|217|217|694|217|217|478|217|217	1145	['TTC28']	S28: Phospho	FALSE	['NA']	FALSE	0	CID	Yes	Yes	Yes	44.38	3.89	1	48.27	217	217	694	217	217	478	217	217	217	217	694
AGMTSSPDATTGQTFG|M3: Oxidation; S6: Phospho	18	gi|145386566|ref|NP_068799.2|	1	zinc finger protein 148 [Homo sapiens]	108409	108409	1	54	AGMTSSPDATTGQTFG	M3: Oxidation; S6: Phospho	M781: Oxidation; S784: Phospho	964.915	2	1927.82	-0.002776	53.9	1	779	794	R	-	0	2012-08-10-Look-iTRAQ-pST-9-230.3722.3722.2.dta - 964.91510|207|207|693|207|410|366|207|207	2432	['ZNF148']	S784: Phospho				0	CID	No	N/A	N/A	N/A	N/A	2	53.9	416	416	1147	416	619	575	416	416	207	207	693
SISGTPAETPACK|S3: Phospho	200	gi|157885806|ref|NP_001103132.1|	1	chromosome 12 open reading frame 51 [Homo sapiens]	505247	505247	1	18	SISGTPAETPACK	S3: Phospho	S1075: Phospho	669.672	3	2006	-0.004862	18.4	1	1073	1085	R	S	0	2012-08-10-Look-iTRAQ-pST-11-230.3071.3071.3.dta - 669.67300|481|632|402|646|467|691|711|700	2332	['unresolved: gi|157885806|ref|NP_001103132.1|']	S1075: Phospho	FALSE	['NA']	FALSE	0.00867052	HCD	No	N/A	N/A	N/A	N/A	1	18.4	481	632	402	646	467	691	711	700	481	632	402
ASSPAQCVTPVQTVV|S2: Phospho	64	gi|41350316|ref|NP_958435.1|; gi|41350318|ref|NP_958438.1|; gi|44680154|ref|NP_057240.3|	3	myotubularin-related protein 2 isoform 2 [Homo sapiens]; myotubularin-related protein 2 isoform 1 [Homo sapiens]	76165; 84552	76165	1	33	ASSPAQCVTPVQTVV	S2: Phospho	S558: Phospho	964.476	2	1926.94	-0.004914	32.67	1	557	571	R	-	0	2012-08-10-Look-iTRAQ-pST-13-230.4067.4067.2.dta - 964.47680|921|744|1155|1154|1987|1986|2351|1210	1665	['MTMR2']	S558: Phospho	FALSE	['NA']	FALSE	0	CID	No	N/A	N/A	N/A	N/A	1	32.67	921	744	1155	1154	1987	1986	2351	1210	921	744	1155
GRLSPVPVPR|S4: Phospho	140	gi|8051631|ref|NP_057951.1|; gi|21396480|ref|NP_031393.2|	2	RNA binding protein (autoantigenic, hnRNP-associated with lethal yellow) long isoform [Homo sapiens]; RNA binding protein (autoantigenic, hnRNP-associated with lethal yellow) short isoform [Homo sapiens]	39497; 37400	39497	1	29	GRLSPVPVPR	S4: Phospho	S135: Phospho	487.943	3	1460.82	-0.010177	28.55	1	132	141	R	A	1	2012-08-10-Look-iTRAQ-pST-15-70.2707.2707.3.dta - 487.94350|1837|2467|2843|3362|4022|5241|2611|7306	1150	['RALY']	S135: Phospho	FALSE	['NA']	FALSE	0	HCD	No	N/A	N/A	N/A	N/A	21	33.52	10761	13014	24190	15356	18997	20188	10001	17974	1837	2467	2843
QISQDVK|S3: Phospho	201	gi|21264318|ref|NP_004028.3|; gi|34147621|ref|NP_631895.1|; gi|55925574|ref|NP_981949.1|	3	adenosine monophosphate deaminase 2 (isoform L) isoform 1 [Homo sapiens]; adenosine monophosphate deaminase 2 (isoform L) isoform 2 [Homo sapiens]; adenosine monophosphate deaminase 2 (isoform L) isoform 3 [Homo sapiens]	114199; 103648; 98751	114199	1	16	QISQDVK	S3: Phospho	S168: Phospho	502.608	3	1504.81	-0.00831	15.86	1	166	172	R	L	0	2012-08-10-Look-iTRAQ-pST-9-230.3286.3286.3.dta - 502.60840|966|1060|557|2045|1429|1933|1633|2427	1487	['AMPD2']	S168: Phospho				0.00700935	HCD	No	N/A	N/A	N/A	N/A	1	15.86	966	1060	557	2045	1429	1933	1633	2427	966	1060	557
EVDEDSEPEREVR|S6: Phospho	83	gi|56550051|ref|NP_006581.2|	1	ubiquitin specific protease 39 [Homo sapiens]	79732	79732	1	38	EVDEDSEPEREVR	S6: Phospho	S82: Phospho	658.298	3	1971.87	-0.000648	37.62	1	77	89	R	A	1	2012-08-10-Look-iTRAQ-pST-9-700.2371.2371.3.dta - 658.29830|1704|1676|547|1663|640|470|941|2098	1473	['USP39']	S82: Phospho	FALSE	['NA']	FALSE	0	HCD	No	N/A	N/A	N/A	N/A	1	37.62	1704	1676	547	1663	640	470	941	2098	1704	1676	547
AIGGIILTASHNPGGPNGDFGIK|T8: Phospho	20	gi|21361621|ref|NP_002624.2|	1	phosphoglucomutase 1 [Homo sapiens]	72951	72951	1	49	AIGGIILTASHNPGGPNGDFGIK	T8: Phospho	T115: Phospho	724.389	4	2893.53	-0.005369	48.52	1	108	130	K	F	0	2012-08-10-Look-iTRAQ-pST-20-230.3449.3449.4.dta - 724.38960|204|573|501|204|204|204|204|363	960	['PGM1']	T115: Phospho	FALSE	['NA']	FALSE	0	HCD	No	N/A	N/A	N/A	N/A	2	48.52	204	573	501	204	204	204	204	363	204	573	501
KMSGGSTMSSGGGNTNNSNSK|M2: Oxidation; S3: Phospho; M8: Oxidation	162	gi|4504969|ref|NP_003884.1|; gi|164663816|ref|NP_001106878.1|	2	LIM domain binding 1 isoform 3 [Homo sapiens]; LIM domain binding 1 isoform 1 [Homo sapiens]	49018; 53822	49018	1	23	KMSGGSTMSSGGGNTNNSNSK	M2: Oxidation; S3: Phospho; M8: Oxidation	M265: Oxidation; S266: Phospho; M271: Oxidation	757.609	4	3026.42	-0.011642	24.07	1	264	284	R	K	1	2012-08-10-Look-iTRAQ-pST-11-230.1522.1522.4.dta - 757.61000|203|203|842|203|203|531|203|203	2740	['LDB1']	S266: Phospho	FALSE	['NA']	FALSE	0.00796813	HCD	Yes	Yes	Yes	20.51	3.56	1	24.07	203	203	842	203	203	531	203	203	203	203	842
RSPSPTPTPGPSR|S4: Phospho; T6: Phospho	64	gi|4502775|ref|NP_001800.1|; gi|109637779|ref|NP_001035891.1|	2	centromere protein A isoform a [Homo sapiens]; centromere protein A isoform b [Homo sapiens]	18471; 15123	18471	4	37	RSPSPTPTPGPSR	S4: Phospho; T6: Phospho	S19: Phospho; T21: Phospho	900.916	2	1799.83	-0.010467	25.29	1	16	28	R	R	1	2012-08-10-Look-iTRAQ-pST-0-700.1866.1866.2.dta - 900.91580|204|349|851|558|782|924|204|859	2034	['CENPA']	S19: Phospho; T21: Phospho				0	CID	Yes	Yes	S2: Phospho; S4: Phospho	8.12	17.17	1	25.29	204	349	851	558	782	924	204	859	204	349	851
SSFFSDRGSGSR|S9: Phospho	206	gi|87196351|ref|NP_001347.3|	1	DEAD/H (Asp-Glu-Ala-Asp/His) box polypeptide 3 [Homo sapiens]	83636	83636	1	16	SSFFSDRGSGSR	S9: Phospho	S90: Phospho	558.59	3	1672.75	-0.00371	16.25	1	82	93	K	G	1	2012-08-10-Look-iTRAQ-pST-15-70.3041.3041.3.dta - 558.58920|1257|2375|1798|2812|898|3540|1512|1846	1437	['DDX3X']	S90: Phospho	FALSE	['NA']	FALSE	0.0025974	HCD	No	N/A	N/A	N/A	N/A	1	16.25	1257	2375	1798	2812	898	3540	1512	1846	1257	2375	1798
SFPLTR|S1: Phospho	155	gi|27262655|ref|NP_004504.3|; gi|148833504|ref|NP_757366.2|	2	interleukin 16 isoform 1 precursor [Homo sapiens]; interleukin 16 isoform 2 [Homo sapiens]	78203; 167921	78203	1	22	SFPLTR	S1: Phospho	S265: Phospho	552.789	2	1103.57	-0.00407	21.98	1	265	270	R	S	0	2012-08-10-Look-iTRAQ-pST-13-230.3357.3357.2.dta - 552.79000|1772|3996|1529|3945|2790|3173|5216|3000	342	['IL16']	S265: Phospho	FALSE	['NA']	FALSE	0	HCD	No	N/A	N/A	N/A	N/A	1	21.98	1772	3996	1529	3945	2790	3173	5216	3000	1772	3996	1529
RGSNVALMLDVR|S3: Phospho	38	gi|18375658|ref|NP_002823.2|; gi|18375660|ref|NP_542155.1|	2	protein tyrosine phosphatase, non-receptor type 7 isoform 1 [Homo sapiens]; protein tyrosine phosphatase, non-receptor type 7 isoform 2 [Homo sapiens]	45523; 49993	45523	6	58	RGSNVALMLDVR	S3: Phospho	S44: Phospho	572.302	3	1713.89	-0.005174	55.19	1	42	53	R	S	1	2012-08-10-Look-iTRAQ-pST-15-70.4507.4507.3.dta - 572.30230|214|214|214|214|214|303|393|214	1494	['PTPN7']	S44: Phospho	FALSE	['NA']	FALSE	0	HCD	Yes	Yes	Yes	50.57	4.62	1	55.19	214	214	214	214	214	303	393	214	214	214	214
ASAVALEVQR|S2: Phospho	81	gi|9558749|ref|NP_037434.1|	1	elongation factor-2 kinase [Homo sapiens]	94555	94555	1	36	ASAVALEVQR	S2: Phospho	S500: Phospho	476.589	3	1426.75	-0.005092	36.38	1	499	508	R	L	0	2012-08-10-Look-iTRAQ-pST-11-230.4347.4347.3.dta - 476.58850|1262|1533|1566|1939|1613|2115|1440|1794	1136	['EEF2K']	S500: Phospho	TRUE	['sp|O00418|EF2K_HUMAN Eukaryotic elongation factor 2 kinase OS=Homo sapiens GN=EEF2K PE=1 SV=2']	TRUE	0	HCD	No	N/A	N/A	N/A	N/A	1	36.38	1262	1533	1566	1939	1613	2115	1440	1794	1262	1533	1566
LGEDPYYTENGGGQGYSSGPGTSPEAQGK|S23: Phospho	108	gi|68342038|ref|NP_001020280.1|	1	CD34 antigen isoform a [Homo sapiens]	46262	46262	1	16	LGEDPYYTENGGGQGYSSGPGTSPEAQGK	S23: Phospho	S346: Phospho	898.663	4	3590.63	-0.007614	17.91	1	324	352	R	A	0	2012-08-10-Look-iTRAQ-pST-13-700.3154.3154.4.dta - 898.66250|217|217|217|217|217|217|268|217	1533	['CD34']	S346: Phospho	FALSE	['NA']	FALSE	0.00680272	CID	No	N/A	N/A	N/A	N/A	1	17.91	217	217	217	217	217	217	268	217	217	217	217
NTEESSSPVRK|S7: Phospho	3	gi|116008442|ref|NP_055885.3|	1	zinc finger CCCH-type containing 13 [Homo sapiens]	222881	222881	10	158	NTEESSSPVRK	S7: Phospho	S110: Phospho	641.331	3	1920.98	-0.005543	15.83	1	104	114	R	E	1	2012-08-10-Look-iTRAQ-pST-0-700.2023.2023.3.dta - 641.33100|1216|1513|3971|2364|1928|2543|1233|1447	2375	['ZC3H13']	S110: Phospho				0.00326797	HCD	No	N/A	N/A	N/A	N/A	2	20.94	1878	2341	6110	3297	2382	4099	1447	2095	1216	1513	3971
RLSPSASPPR|S3: Phospho; S7: Phospho	1	gi|42542379|ref|NP_005830.2|	1	serine/arginine repetitive matrix 1 [Homo sapiens]	133664	133664	52	381	RLSPSASPPR	S3: Phospho; S7: Phospho	S389: Phospho; S393: Phospho	766.368	2	1530.73	-0.00539	22.03	1	387	396	R	R	1	2012-08-10-Look-iTRAQ-pST-9-230.2856.2856.2.dta - 766.36800|478|777|1552|421|325|1053|422|665	1537	['SRRM1']	S389: Phospho; S393: Phospho				0.00323625	HCD	No	N/A	N/A	N/A	N/A	5	22.44	1488	2162	4972	1322	1380	2244	1257	1758	478	777	1552
SQSFAGVLGSHER|S3: Phospho	85	gi|39995080|ref|NP_078795.2|	1	hypothetical protein LOC79567 [Homo sapiens]	142419	142419	1	37	SQSFAGVLGSHER	S3: Phospho	S22: Phospho	586.953	3	1757.84	-0.002742	37.16	1	20	32	R	G	0	2012-08-10-Look-iTRAQ-pST-15-230.2928.2928.3.dta - 586.95270|210|210|563|210|210|420|210|210	995	['FAM65A']	S22: Phospho	FALSE	['NA']	FALSE	0	HCD	No	N/A	N/A	N/A	N/A	1	37.16	210	210	563	210	210	420	210	210	210	210	563
RPSASSPNNNTAAK|S3: Phospho	128	gi|117190342|ref|NP_005383.3|	1	PHD finger protein 2 [Homo sapiens]	159391	159391	1	28	RPSASSPNNNTAAK	S3: Phospho	S1056: Phospho	701.694	3	2102.07	-0.013907	27.73	1	1054	1067	R	G	0	2012-08-10-Look-iTRAQ-pST-9-230.1838.1838.3.dta - 701.69390|618|683|1106|1006|440|1487|463|754	2673	['PHF2']	S1056: Phospho				0	HCD	No	N/A	N/A	N/A	N/A	1	27.73	618	683	1106	1006	440	1487	463	754	618	683	1106
GESPPTPPGQPPISPK|T6: Phospho	196	gi|40254823|ref|NP_005532.2|; gi|64085167|ref|NP_001017915.1|	2	SH2 containing inositol phosphatase isoform b [Homo sapiens]; SH2 containing inositol phosphatase isoform a [Homo sapiens]	162618; 162717	162618	1	15	GESPPTPPGQPPISPK	T6: Phospho	T962: Phospho	758.733	3	2273.19	-0.014736	14.93	1	957	972	R	K	0	2012-08-10-Look-iTRAQ-pST-13-230.3138.3138.3.dta - 758.73380|212|378|212|212|212|212|352|307	1968	['INPP5D']	T962: Phospho	FALSE	['NA']	FALSE	0	HCD	No	N/A	N/A	N/A	N/A	1	14.93	212	378	212	212	212	212	352	307	212	378	212
TLSPTPSAEGYQDVR|T5: Phospho	78	gi|51173711|ref|NP_002304.3|; gi|51173713|ref|NP_001003407.1|; gi|51173715|ref|NP_001003408.1|; gi|51173717|ref|NP_006711.3|	4	actin-binding LIM protein 1 isoform a [Homo sapiens]; actin-binding LIM protein 1 isoform b [Homo sapiens]; actin-binding LIM protein 1 isoform c [Homo sapiens]; actin-binding LIM protein 1 isoform s [Homo sapiens]	105636; 97267; 100821; 60294	105636	1	29	TLSPTPSAEGYQDVR	T5: Phospho	T433: Phospho	668.989	3	2003.95	-0.004988	29.71	1	429	443	R	D	0	2012-08-10-Look-iTRAQ-pST-11-700.2915.2915.3.dta - 668.98930|329|208|208|800|281|787|482|309	1107	['ABLIM1']	T433: Phospho	FALSE	['NA']	FALSE	0	HCD	Yes	Yes	T1: Phospho	22.77	6.94	1	29.71	329	208	208	800	281	787	482	309	329	208	208
SRTPPSAPSQSR|T3: Phospho	2	gi|118572613|ref|NP_057417.3|	1	splicing coactivator subunit SRm300 [Homo sapiens]	340030	340030	34	358	SRTPPSAPSQSR	T3: Phospho	T2409: Phospho	552.278	3	1653.81	-0.003522	30.72	1	2407	2418	R	M	1	2012-08-10-Look-iTRAQ-pST-9-230.1595.1595.3.dta - 552.27770|1192|1602|1501|1174|924|1325|1044|1598	1816	['SRRM2']	T2409: Phospho				0	HCD	No	N/A	N/A	N/A	N/A	1	30.72	1192	1602	1501	1174	924	1325	1044	1598	1192	1602	1501
TVSEPNLK|S3: Phospho	105	gi|148539870|ref|NP_001091886.1|; gi|169234807|ref|NP_056216.2|	2	histone deacetylase 7 isoform d [Homo sapiens]; histone deacetylase 7 isoform a [Homo sapiens]	113488; 117321	113488	1	33	TVSEPNLK	S3: Phospho	S194: Phospho	525.956	3	1574.85	-0.005655	32.59	1	192	199	K	L	0	2012-08-10-Look-iTRAQ-pST-11-230.3378.3378.3.dta - 525.95680|876|1343|1336|1812|743|1528|1113|676	1457	['HDAC7']	S194: Phospho	FALSE	['NA']	FALSE	0	HCD	No	N/A	N/A	N/A	N/A	1	32.59	876	1343	1336	1812	743	1528	1113	676	876	1343	1336
LGLGTLSSSLSR|T5: Phospho	32	gi|239735519|ref|NP_002963.2|	1	SET binding factor 1 [Homo sapiens]	233407	233407	1	61	LGLGTLSSSLSR	T5: Phospho	T1137: Phospho	787.929	2	1573.84	0.00609	61.04	1	1133	1144	R	A	0	2012-08-10-Look-iTRAQ-pST-20-30.4327.4327.2.dta - 787.92970|6559|7980|3829|9457|5728|12358|11938|12725	872	['SBF1']	T1137: Phospho	FALSE	['NA']	FALSE	0	HCD	No	N/A	N/A	N/A	N/A	1	61.04	6559	7980	3829	9457	5728	12358	11938	12725	6559	7980	3829
RSSLSPGR|S3: Phospho; S5: Phospho	131	gi|41327771|ref|NP_004809.2|	1	DEAD (Asp-Glu-Ala-Asp) box polypeptide 23 [Homo sapiens]	122332	122332	2	36	RSSLSPGR	S3: Phospho; S5: Phospho	S107: Phospho; S109: Phospho	441.876	3	1322.61	-8.6e-05	29.09	1	105	112	K	G	1	2012-08-10-Look-iTRAQ-pST-0-700.1650.1650.3.dta - 441.87590|916|1031|2591|1382|1561|1200|689|960	946	['DDX23']	S107: Phospho; S109: Phospho				0	HCD	No	N/A	N/A	N/A	N/A	1	29.09	916	1031	2591	1382	1561	1200	689	960	916	1031	2591
MDSFDEDLARPSGLLAQER|M1: Oxidation; S3: Phospho	43	gi|167234419|ref|NP_005110.2|	1	thyroid hormone receptor associated protein 3 [Homo sapiens]	139383	139383	1	33	MDSFDEDLARPSGLLAQER	M1: Oxidation; S3: Phospho	M573: Oxidation; S575: Phospho	638.302	4	2549.18	0.002065	34.5	1	573	591	R	K	0	2012-08-10-Look-iTRAQ-pST-13-700.3940.3940.4.dta - 638.30240|210|210|210|252|210|210|210|210	1263	['THRAP3']	S575: Phospho	FALSE	['NA']	FALSE	0	CID	No	N/A	N/A	N/A	N/A	1	34.5	210	210	210	252	210	210	210	210	210	210	210
EQAEAEVASLNRR|S9: Phospho	286	gi|24119203|ref|NP_705935.1|; gi|114155144|ref|NP_001036816.1|; gi|114155146|ref|NP_001036817.1|; gi|114155148|ref|NP_001036818.1|	4	tropomyosin 3 isoform 2 [Homo sapiens]; tropomyosin 3 isoform 4 [Homo sapiens]; tropomyosin 3 isoform 3 [Homo sapiens]; tropomyosin 3 isoform 5 [Homo sapiens]	36544; 36933; 35801; 36191	36544	1	10	EQAEAEVASLNRR	S9: Phospho	S51: Phospho	619.644	3	1855.91	-0.000874	10.4	1	43	55	R	I	1	2012-08-10-Look-iTRAQ-pST-0-700.3920.3920.3.dta - 619.64350|483|977|983|927|859|1186|503|1322	2205	['TPM3']	S51: Phospho				0.0066313	HCD	No	N/A	N/A	N/A	N/A	1	10.4	483	977	983	927	859	1186	503	1322	483	977	983
RMSGEPIQTVESIR|S3: Phospho	17	gi|183396804|ref|NP_056018.2|	1	Regulation of nuclear pre-mRNA domain containing 2 [Homo sapiens]	183150	183150	5	82	RMSGEPIQTVESIR	S3: Phospho	S1099: Phospho	663.006	3	1985.99	0.004586	28.94	1	1097	1110	R	V	1	2012-08-10-Look-iTRAQ-pST-13-230.4316.4316.3.dta - 663.00710|217|842|472|759|862|1265|706|1147	1747	['RPRD2']	S1099: Phospho	FALSE	['NA']	FALSE	0	HCD	No	N/A	N/A	N/A	N/A	1	28.94	217	842	472	759	862	1265	706	1147	217	842	472
TPSSPLQSCTPSLSPR|S4: Phospho	8	gi|130978956|ref|NP_001075955.1|; gi|130978962|ref|NP_075065.2|; gi|130979214|ref|NP_001075956.1|	3	adrenocortical dysplasia homolog isoform 1 [Homo sapiens]; adrenocortical dysplasia homolog isoform 2 [Homo sapiens]; adrenocortical dysplasia homolog isoform 3 [Homo sapiens]	62013; 61672; 59862	62013	3	100	TPSSPLQSCTPSLSPR	S4: Phospho	S425: Phospho	700.342	3	2098.01	-0.002101	50.39	1	422	437	R	S	0	2012-08-10-Look-iTRAQ-pST-13-230.3362.3362.3.dta - 700.34310|500|688|458|1151|731|1043|639|1020	1848	['ACD']	S425: Phospho	FALSE	['NA']	FALSE	0	HCD	Yes	Yes	Yes	25.43	24.96	1	50.39	500	688	458	1151	731	1043	639	1020	500	688	458
RHSHSHSPMSTR|S3: Phospho; S5: Phospho; S7: Phospho	28	gi|4759098|ref|NP_004584.1|	1	splicing factor, arginine/serine-rich 10 [Homo sapiens]	36193	36193	11	72	RHSHSHSPMSTR	S3: Phospho; S5: Phospho; S7: Phospho	S95: Phospho; S97: Phospho; S99: Phospho	491.697	4	1962.76	-0.004822	13.23	1	93	104	R	R	1	2012-08-10-Look-iTRAQ-pST-0-700.1236.1236.4.dta - 491.69720|212|212|602|212|212|451|212|212	2458	['TRA2B']	S95: Phospho; S97: Phospho; S99: Phospho				0.00290276	HCD	No	N/A	N/A	N/A	N/A	1	13.23	212	212	602	212	212	451	212	212	212	212	602
MDRTPPPPTLSPAAITVGR|M1: Oxidation; T4: Phospho	133	gi|148612879|ref|NP_079223.3|	1	polyhomeotic like 3 [Homo sapiens]	116729	116729	1	19	MDRTPPPPTLSPAAITVGR	M1: Oxidation; T4: Phospho	M618: Oxidation; T621: Phospho	793.078	3	2376.22	-0.006474	18.5	1	618	636	R	G	1	2012-08-10-Look-iTRAQ-pST-15-70.3993.3993.3.dta - 793.07760|211|211|211|362|211|443|211|325	2033	['PHC3']	T621: Phospho	FALSE	['NA']	FALSE	0	CID	Yes	Yes	Yes	16.38	2.12	1	18.5	211	211	211	362	211	443	211	325	211	211	211
ALSLEENGVGSNFK|S3: Phospho	67	gi|238231392|ref|NP_982272.2|	1	dedicator of cytokinesis 8 [Homo sapiens]	280129	280129	1	14	ALSLEENGVGSNFK	S3: Phospho	S451: Phospho	718.375	3	2152.1	0.001726	14.48	1	449	462	R	T	0	2012-08-10-Look-iTRAQ-pST-15-700.3235.3235.3.dta - 718.37570|209|327|209|437|209|209|209|209	642	['DOCK8']	S451: Phospho	FALSE	['NA']	FALSE	0.00869565	HCD	No	N/A	N/A	N/A	N/A	1	14.48	209	327	209	437	209	209	209	209	209	327	209
SLHPWYGITPTSSPK|S13: Phospho	50	gi|31324577|ref|NP_203744.1|	1	molecule interacting with Rab13 [Homo sapiens]	111084	111084	1	28	SLHPWYGITPTSSPK	S13: Phospho	S471: Phospho	590.561	4	2358.22	-0.009314	28.26	1	459	473	K	T	0	2012-08-10-Look-iTRAQ-pST-20-230.2946.2946.4.dta - 590.56150|207|534|438|207|207|754|656|434	770	['MICALL1']	S471: Phospho	FALSE	['NA']	FALSE	0	HCD	No	N/A	N/A	N/A	N/A	1	28.26	207	534	438	207	207	754	656	434	207	534	438
ELSRPGDLATPESSAAASPR|S3: Phospho	123	gi|31377585|ref|NP_689552.2|	1	spermatogenesis associated 2-like [Homo sapiens]	48963	48963	1	29	ELSRPGDLATPESSAAASPR	S3: Phospho	S317: Phospho	799.396	3	2395.17	-0.001914	28.85	1	315	334	R	R	0	2012-08-10-Look-iTRAQ-pST-11-230.3977.3977.3.dta - 799.39680|208|208|208|753|208|1109|547|208	2610	['SPATA2L']	S317: Phospho	FALSE	['NA']	FALSE	0.005	HCD	No	N/A	N/A	N/A	N/A	1	28.85	208	208	208	753	208	1109	547	208	208	208	208
KASGTYAGPPTSALPAQR|S3: Phospho	5	gi|71274144|ref|NP_001025053.1|	1	AT hook, DNA binding motif, containing 1 [Homo sapiens]	192466	192466	2	84	KASGTYAGPPTSALPAQR	S3: Phospho	S868: Phospho	616.081	4	2460.3	-0.003785	23.1	1	866	883	R	G	1	2012-08-10-Look-iTRAQ-pST-15-70.2819.2819.4.dta - 616.08000|206|206|206|206|206|468|206|663	2074	['AHDC1']	S868: Phospho	FALSE	['NA']	FALSE	0	CID	Yes	Yes	Yes	14.86	8.24	1	23.1	206	206	206	206	206	468	206	663	206	206	206
SSPSTGSLDSGNESKEK|S7: Phospho	172	gi|187608516|ref|NP_036419.3|	1	centaurin, beta 2 [Homo sapiens]	109020	109020	1	19	SSPSTGSLDSGNESKEK	S7: Phospho	S384: Phospho	676.342	4	2701.36	-0.019768	19.21	1	378	394	K	L	1	2012-08-10-Look-iTRAQ-pST-9-700.2347.2347.4.dta - 676.34200|203|394|594|203|203|759|203|791	1996	['ACAP2']	S384: Phospho	FALSE	['NA']	FALSE	0	HCD	No	N/A	N/A	N/A	N/A	1	19.21	203	394	594	203	203	759	203	791	203	394	594
GSGAAGSSQTGDALGK|S8: Phospho	135	gi|4507399|ref|NP_003190.1|; gi|145312267|ref|NP_001077431.1|	2	transcription factor 4 isoform b [Homo sapiens]; transcription factor 4 isoform a [Homo sapiens]	79402; 79888	79402	1	26	GSGAAGSSQTGDALGK	S8: Phospho	S318: Phospho	684.679	3	2051.01	-0.000435	25.84	1	311	326	R	A	0	2012-08-10-Look-iTRAQ-pST-9-230.3128.3128.3.dta - 684.67890|202|726|202|3020|727|202|443|202	2625	['TCF4']	S318: Phospho				0	HCD	No	N/A	N/A	N/A	N/A	1	25.84	202	726	202	3020	727	202	443	202	202	726	202
ANVSSPHREFPPATAR|S5: Phospho	215	gi|145611426|ref|NP_006805.2|; gi|145611430|ref|NP_848693.2|	2	proteasome inhibitor subunit 1 [Homo sapiens]	32707	32707	1	16	ANVSSPHREFPPATAR	S5: Phospho	S153: Phospho	707.687	3	2120.05	-0.008291	15.86	1	149	164	K	E	1	2012-08-10-Look-iTRAQ-pST-15-70.2120.2120.3.dta - 707.68770|964|1343|996|1470|1205|1819|1545|1669	1946	['PSMF1']	S153: Phospho	FALSE	['NA']	FALSE	0.00251889	HCD	No	N/A	N/A	N/A	N/A	4	29.01	1380	2370	1762	2093	2372	3218	3201	2539	964	1343	996
TESVPSDINNPVDR|S3: Phospho	64	gi|75677325|ref|NP_055053.1|	1	kinase suppressor of ras [Homo sapiens]	99302	99302	1	43	TESVPSDINNPVDR	S3: Phospho	S269: Phospho	642.974	3	1925.9	-0.002977	43.23	1	267	280	R	A	0	2012-08-10-Look-iTRAQ-pST-9-700.3262.3262.3.dta - 642.97450|197|197|197|424|332|513|335|301	1402	['KSR1']	S269: Phospho	FALSE	['NA']	FALSE	0	HCD	Yes	Yes	T1: Phospho	27.29	15.94	1	43.23	197	197	197	424	332	513	335	301	197	197	197
NSPSAASTSSNDSK|S2: Phospho	21	gi|112382216|ref|NP_036234.3|; gi|112382224|ref|NP_001036146.1|; gi|112382226|ref|NP_001036147.1|	3	atrophin-1 like protein isoform a [Homo sapiens]; atrophin-1 like protein isoform b [Homo sapiens]	197794; 121073	197794	3	83	NSPSAASTSSNDSK	S2: Phospho	S613: Phospho	680.991	3	2039.96	-0.011227	30.55	1	612	625	R	A	0	2012-08-10-Look-iTRAQ-pST-0-700.1747.1747.3.dta - 680.99140|212|908|2216|1546|1590|1706|496|535	2644	['RERE']	S613: Phospho				0	HCD	Yes	Yes	S4: Phospho	23.33	7.22	1	30.55	212	908	2216	1546	1590	1706	496	535	212	908	2216
SSPQHSLSNPLPR|S2: Phospho	72	gi|45643117|ref|NP_006843.2|	1	tousled-like kinase 2 isoform A [Homo sapiens]	105049	105049	1	40	SSPQHSLSNPLPR	S2: Phospho	S111: Phospho	601.972	3	1802.9	-0.004593	39.67	1	110	122	R	R	0	2012-08-10-Look-iTRAQ-pST-13-230.2722.2722.3.dta - 601.97250|797|1311|1968|1148|1358|1579|932|1222	1461	['TLK2']	S111: Phospho	TRUE	['sp|Q86UE8|TLK2_HUMAN Serine/threonine-protein kinase tousled-like 2 OS=Homo sapiens GN=TLK2 PE=1 SV=2']	TRUE	0	HCD	Yes	Yes	Yes	18.68	20.99	1	39.67	797	1311	1968	1148	1358	1579	932	1222	797	1311	1968
RNSLPQIPMLNLEAR|S3: Phospho; M9: Oxidation	76	gi|27886584|ref|NP_004094.3|; gi|27886586|ref|NP_775266.1|; gi|27886588|ref|NP_775267.1|; gi|27886590|ref|NP_775268.1|	4	PTK2B protein tyrosine kinase 2 beta isoform a [Homo sapiens]; PTK2B protein tyrosine kinase 2 beta isoform b [Homo sapiens]	138102; 133052	138102	1	35	RNSLPQIPMLNLEAR	S3: Phospho; M9: Oxidation	S375: Phospho; M381: Oxidation	718.046	3	2151.12	-0.002645	36.09	1	373	387	K	R	1	2012-08-10-Look-iTRAQ-pST-20-30.3922.3922.3.dta - 718.04580|298|388|414|448|453|377|217|606	1398	['PTK2B']	S375: Phospho	TRUE	['sp|Q14289|FAK2_HUMAN Protein-tyrosine kinase 2-beta OS=Homo sapiens GN=PTK2B PE=1 SV=2']	TRUE	0	HCD	No	N/A	N/A	N/A	N/A	1	36.09	298	388	414	448	453	377	217	606	298	388	414
RGSDPASGEVEASQLR|S3: Phospho	18	gi|31542667|ref|NP_060776.2|	1	transmembrane protein 40 [Homo sapiens]	28635	28635	1	72	RGSDPASGEVEASQLR	S3: Phospho	S137: Phospho	681.665	3	2041.97	-0.001151	72.5	1	135	150	R	R	1	2012-08-10-Look-iTRAQ-pST-9-230.3388.3388.3.dta - 681.66500|208|686|445|1221|208|454|208|208	2603	['TMEM40']	S137: Phospho				0	HCD	Yes	Yes	Yes	27.95	44.55	1	72.5	208	686	445	1221	208	454	208	208	208	686	445
SPPPR|S1: Phospho	247	gi|4506901|ref|NP_003008.1|; gi|145580631|ref|NP_859052.3|; gi|146198549|ref|NP_001078906.1|; gi|146198668|ref|NP_079137.2|; gi|169164209|ref|XP_001720135.1|; gi|239741571|ref|XP_002342241.1|; gi|239742810|ref|XP_932622.4|; gi|239748752|ref|XP_002346787.1|; gi|239748765|ref|XP_943585.4|; gi|239754233|ref|XP_001718589.2|; gi|47523378|ref|NP_998891.1|; gi|7710129|ref|NP_006141.2|; rev_gi|15451844|r…	15	splicing factor, arginine/serine-rich 3 [Homo sapiens]; quiescin Q6 sulfhydryl oxidase 2 precursor [Homo sapiens]; hypothetical protein LOC79919 isoform 1 [Homo sapiens]; hypothetical protein LOC79919 isoform 2 [Homo sapiens]; PREDICTED: hypothetical protein [Homo sapiens]; PREDICTED: hypothetical protein XP_002342241 [Homo sapiens]; PREDICTED: glucosaminyl (N-acetyl) transferase 6 [Homo sapiens]…	21371; 89476; 53526; 33437; 18881; 18881; 51571; 32159; 51571; 51571; 27543; 75352; 116048; 75544; 104797	21371	8	16	SPPPR	S1: Phospho	S108: Phospho	469.243	2	936.474	-0.002735	11	1	108	112	R	R	0	2012-08-10-Look-iTRAQ-pST-0-700.1571.1571.2.dta - 469.24290|5411|6751|10959|7498|10555|11082|7299|8119	242	['SRSF3', 'QSOX2', 'C2orf54', 'unresolved: gi|169164209|ref|XP_001720135.1|', 'unresolved: gi|239741571|ref|XP_002342241.1|', 'GCNT6', 'unresolved: gi|239748752|ref|XP_002346787.1|', 'unresolved: gi|47523378|ref|NP_998891.1|', 'PRICKLE3', 'NA']	S108: Phospho				0.00543478	HCD	No	N/A	N/A	N/A	N/A	8	16.17	27825	34418	76649	45993	42180	60850	27949	30523	5411	6751	10959
IPSFFPSPEEPPSPSAPSIAK|S13: Phospho	42	gi|21493029|ref|NP_009131.2|; gi|21493031|ref|NP_658913.1|; gi|31563330|ref|NP_006729.4|	3	A-kinase anchor protein 13 isoform 2 [Homo sapiens]; A-kinase anchor protein 13 isoform 3 [Homo sapiens]; A-kinase anchor protein 13 isoform 1 [Homo sapiens]	368789; 154369; 369141	368789	2	31	IPSFFPSPEEPPSPSAPSIAK	S13: Phospho	S2709: Phospho	718.378	4	2869.48	0.007046	31.64	1	2697	2717	R	S	0	2012-08-10-Look-iTRAQ-pST-20-230.3881.3881.4.dta - 718.37780|209|209|209|337|500|209|414|209	945	['AKAP13']	S2709: Phospho	FALSE	['NA']	FALSE	0	HCD	Yes	Yes	Yes	27.11	4.53	1	31.64	209	209	209	337	500	209	414	209	209	209	209
LLPYPTLASPASD|S12: Phospho	39	gi|7019371|ref|NP_037474.1|	1	TCF3 (E2A) fusion partner [Homo sapiens]	30144	30144	1	31	LLPYPTLASPASD	S12: Phospho	S252: Phospho	864.942	2	1727.87	-0.000474	32.48	1	241	253	K	-	0	2012-08-10-Look-iTRAQ-pST-20-230.3957.3957.2.dta - 864.94270|212|475|828|537|503|813|212|586	506	['TFPT']	S252: Phospho	FALSE	['NA']	FALSE	0	CID	Yes	Yes	Yes	12.64	19.84	1	32.48	212	475	828	537	503	813	212	586	212	475	828
VHAAPAAPSATALPASPVAR|S16: Phospho	44	gi|41281821|ref|NP_733745.1|; gi|216547763|ref|NP_005480.2|; gi|216547769|ref|NP_001136003.1|; gi|216547779|ref|NP_001136004.1|; gi|216547790|ref|NP_001136005.1|; gi|216547801|ref|NP_001136006.1|	6	SH2 domain containing 3C isoform a [Homo sapiens]; SH2 domain containing 3C isoform b [Homo sapiens]; SH2 domain containing 3C isoform c [Homo sapiens]; SH2 domain containing 3C isoform c [Homo sapiens]; SH2 domain containing 3C isoform d [Homo sapiens]; SH2 domain containing 3C isoform e [Homo sapiens]	109467; 88006; 62248; 62248; 88023; 87796	109467	1	55	VHAAPAAPSATALPASPVAR	S16: Phospho	S440: Phospho	747.071	3	2238.18	0.007831	55.31	1	425	444	R	R	0	2012-08-10-Look-iTRAQ-pST-15-70.2987.2987.3.dta - 747.06960|209|209|592|209|209|461|209|209	1991	['SH2D3C']	S440: Phospho	FALSE	['NA']	FALSE	0	HCD	Yes	Yes	Yes	47.74	7.57	1	55.31	209	209	592	209	209	461	209	209	209	209	592
RSSDSWEVWGSASTNR|S3: Phospho	11	gi|8922652|ref|NP_060679.1|; gi|28416436|ref|NP_783202.1|	2	ADP-ribosylation factor GTPase activating protein 1 isoform a [Homo sapiens]; ADP-ribosylation factor GTPase activating protein 1 isoform b [Homo sapiens]	53196; 54508	53196	2	101	RSSDSWEVWGSASTNR	S3: Phospho	S361: Phospho	737.004	3	2207.99	0.000566	41.7	1	359	374	R	N	1	2012-08-10-Look-iTRAQ-pST-17p5-70.3631.3631.3.dta - 737.00460|214|214|281|214|351|214|214|311	1580	['ARFGAP1']	S361: Phospho	FALSE	['NA']	FALSE	0	HCD	Yes	Yes	Yes	40.15	1.55	1	41.7	214	214	281	214	351	214	214	311	214	214	281
SSGSPYGGGYGSGGGSGGYGSR|Y10: Phospho	9	gi|34740329|ref|NP_919223.1|	1	heterogeneous nuclear ribonucleoprotein A3 [Homo sapiens]	46491	46491	2	65	SSGSPYGGGYGSGGGSGGYGSR	Y10: Phospho	Y364: Phospho	765.658	3	2293.95	-0.000885	48.74	1	355	376	R	R	0	2012-08-10-Look-iTRAQ-pST-20-30.1879.1879.3.dta - 765.65950|215|510|455|302|215|215|215|215	1439	['HNRNPA3']	Y364: Phospho	FALSE	['NA']	FALSE	0	CID	Yes	Yes	S4: Phospho	32.97	15.77	5	82.58	669	936	997	951	641	824	641	641	215	510	455
NSLGEGQEPK|S2: Phospho	14	gi|14277690|ref|NP_056948.2|; gi|164414421|ref|NP_055537.2|	2	hypothetical protein LOC9750 isoform 2 [Homo sapiens]; hypothetical protein LOC9750 isoform 1 [Homo sapiens]	79796; 139492	79796	2	94	NSLGEGQEPK	S2: Phospho	S439: Phospho	582.966	3	1745.88	-0.005755	27.16	1	438	447	R	S	0	2012-08-10-Look-iTRAQ-pST-0-700.2580.2580.3.dta - 582.96570|210|1312|1196|646|1618|878|914|804	1874	['FAM65B']	S439: Phospho				0	HCD	No	N/A	N/A	N/A	N/A	1	27.16	210	1312	1196	646	1618	878	914	804	210	1312	1196
TPSSEEISPTKFPGLYR|S4: Phospho	144	gi|5803145|ref|NP_006779.1|	1	ralA binding protein 1 [Homo sapiens]	98622	98622	1	26	TPSSEEISPTKFPGLYR	S4: Phospho	S30: Phospho	650.09	4	2596.34	-0.010424	26.64	1	27	43	R	T	1	2012-08-10-Look-iTRAQ-pST-17p5-70.4091.4091.4.dta - 650.09010|212|807|671|701|385|898|504|212	1718	['RALBP1']	S30: Phospho	FALSE	['NA']	FALSE	0	HCD	Yes	Yes	Yes	20.7	5.94	3	33.01	636	1231	1587	1492	916	1573	928	636	212	807	671
RASSASVPAVGASAEGTR|S6: Phospho	57	gi|85838513|ref|NP_705902.2|	1	pantothenate kinase 2 isoform 1 preproprotein [Homo sapiens]	71178	71178	1	42	RASSASVPAVGASAEGTR	S6: Phospho	S171: Phospho	686.677	3	2057.02	-0.010308	42.73	1	166	183	R	R	1	2012-08-10-Look-iTRAQ-pST-11-230.2600.2600.3.dta - 686.67800|213|355|542|422|424|530|419|213	2406	['PANK2']	S171: Phospho	FALSE	['NA']	FALSE	0	HCD	Yes	Yes	S3: Phospho	22.66	20.07	1	42.73	213	355	542	422	424	530	419	213	213	355	542
TKSTPFELIQQR|T4: Phospho	170	gi|224586929|ref|NP_057051.3|; gi|224586931|ref|NP_036543.3|	2	protein tyrosine phosphatase, non-receptor type 22 (lymphoid) isoform 1 [Homo sapiens]; protein tyrosine phosphatase, non-receptor type 22 (lymphoid) isoform 2 [Homo sapiens]	113435; 97599	113435	1	20	TKSTPFELIQQR	T4: Phospho	T450: Phospho	712.729	3	2135.16	0.004942	19.91	1	447	458	R	E	1	2012-08-10-Look-iTRAQ-pST-17p5-70.3870.3870.3.dta - 712.72930|1113|1566|565|1186|1307|954|1186|4463	1558	['PTPN22', 'unresolved: gi|224586931|ref|NP_036543.3|']	T450: Phospho	FALSE	['NA']	FALSE	0.00353357	HCD	No	N/A	N/A	N/A	N/A	1	19.91	1113	1566	565	1186	1307	954	1186	4463	1113	1566	565
ATAPQTQHVSPMR|S10: Phospho; M12: Oxidation	42	gi|25453472|ref|NP_001951.2|; gi|194239723|ref|NP_001123525.1|; gi|194239725|ref|NP_001123526.1|; gi|194239727|ref|NP_001123527.1|; gi|194239729|ref|NP_001123528.1|; gi|194239731|ref|NP_001123529.1|; gi|25453474|ref|NP_115754.2|	7	eukaryotic translation elongation factor 1 delta isoform 2 [Homo sapiens]; eukaryotic translation elongation factor 1 delta isoform 1 [Homo sapiens]; eukaryotic translation elongation factor 1 delta isoform 3 [Homo sapiens]; eukaryotic translation elongation factor 1 delta isoform 4 [Homo sapiens]; eukaryotic translation elongation factor 1 delta isoform 1 [Homo sapiens]	37605; 83684; 83846; 34739; 83684	37605	4	47	ATAPQTQHVSPMR	S10: Phospho; M12: Oxidation	S133: Phospho; M135: Oxidation	608.631	3	1822.87	0.000315	46.88	1	124	136	R	Q	0	2012-08-10-Look-iTRAQ-pST-11-230.1606.1606.3.dta - 608.63130|945|2301|2849|2712|2064|4002|2345|2023	2005	['EEF1D', 'unresolved: gi|194239723|ref|NP_001123525.1|', 'unresolved: gi|194239725|ref|NP_001123526.1|', 'unresolved: gi|25453474|ref|NP_115754.2|']	S133: Phospho	FALSE	['NA']	FALSE	0	HCD	No	N/A	N/A	N/A	N/A	6	46.88	5711	9207	11541	7689	8928	11803	10059	6978	945	2301	2849
NSSTETDQQPHSPDSSSSVHSIR|S12: Phospho	44	gi|7662006|ref|NP_055550.1|; gi|117190334|ref|NP_001070913.1|	2	PHD finger protein 16 [Homo sapiens]	115175	115175	1	41	NSSTETDQQPHSPDSSSSVHSIR	S12: Phospho	S566: Phospho	717.575	4	2866.27	0.002602	41.28	1	555	577	R	N	0	2012-08-10-Look-iTRAQ-pST-11-700.1841.1841.4.dta - 717.57530|206|206|752|206|206|546|206|206	1627	['PHF16']	S566: Phospho	FALSE	['NA']	FALSE	0	HCD	Yes	Yes	Yes	27.94	13.34	1	41.28	206	206	752	206	206	546	206	206	206	206	752
SIQDLTVTGTEPGQVSSR|S1: Phospho	27	gi|4507361|ref|NP_003179.1|; gi|21735562|ref|NP_663304.1|; gi|21735564|ref|NP_663305.1|; gi|21735566|ref|NP_663306.1|	4	mitogen-activated protein kinase kinase kinase 7 isoform A [Homo sapiens]; mitogen-activated protein kinase kinase kinase 7 isoform B [Homo sapiens]; mitogen-activated protein kinase kinase kinase 7 isoform C [Homo sapiens]; mitogen-activated protein kinase kinase kinase 7 isoform D [Homo sapiens]	75881; 79759; 65815; 61938	75881	1	63	SIQDLTVTGTEPGQVSSR	S1: Phospho	S412: Phospho	753.711	3	2258.11	-7.1e-05	62.8	1	412	429	R	S	0	2012-08-10-Look-iTRAQ-pST-13-230.3976.3976.3.dta - 753.70960|209|364|374|405|347|444|395|209	1958	['MAP3K7']	S412: Phospho	TRUE	['sp|O43318|M3K7_HUMAN Mitogen-activated protein kinase kinase kinase 7 OS=Homo sapiens GN=MAP3K7 PE=1 SV=1']	TRUE	0	HCD	Yes	Yes	T6: Phospho	32.57	30.23	2	71.08	416	571	581	612	554	783	810	416	209	364	374
CPFTGNVSIR|S8: Phospho	9	gi|4506681|ref|NP_001006.1|	1	ribosomal protein S11 [Homo sapiens]	25283	25283	4	91	CPFTGNVSIR	S8: Phospho	S67: Phospho	767.873	2	1533.73	-0.000698	26.49	1	60	69	K	G	0	2012-08-10-Look-iTRAQ-pST-15-70.3849.3849.2.dta - 767.87260|1064|678|1936|2491|232|7586|3147|211	1248	['RPS11']	S67: Phospho	FALSE	['NA']	FALSE	0	HCD	Yes	Yes	Yes	17.77	8.72	2	60.24	1397	1143	3024	4026	444	12015	4532	423	1064	678	1936
AVSPPHLDGPPSPRSPVIGSEVFLPNSNHVASGAGEAEER|S3: Phospho; S12: Phospho; S15: Phospho	14	gi|4505903|ref|NP_002666.1|; gi|15451765|ref|NP_150242.1|; gi|15451779|ref|NP_150252.1|; gi|239752618|ref|XP_001717440.2|; gi|67089149|ref|NP_150241.2|; gi|67089157|ref|NP_150243.2|; gi|67089160|ref|NP_150253.2|	7	promyelocytic leukemia protein isoform 6 [Homo sapiens]; promyelocytic leukemia protein isoform 9 [Homo sapiens]; promyelocytic leukemia protein isoform 10 [Homo sapiens]; PREDICTED: similar to promyelocytic leukemia protein [Homo sapiens]; promyelocytic leukemia protein isoform 1 [Homo sapiens]; promyelocytic leukemia protein isoform 2 [Homo sapiens]; promyelocytic leukemia protein isoform 11 [H…	78459; 99010; 72867; 18061; 108573; 75603; 93418	78459	1	8	AVSPPHLDGPPSPRSPVIGSEVFLPNSNHVASGAGEAEER	S3: Phospho; S12: Phospho; S15: Phospho	S518: Phospho; S527: Phospho; S530: Phospho	921.826	5	4604.11	-0.012115	8.27	1	516	555	K	V	1	2012-08-10-Look-iTRAQ-pST-25-230.3209.3209.5.dta - 921.82820|496|449|430|999|349|742|398|440	981	['PML', 'unresolved: gi|239752618|ref|XP_001717440.2|']	S518: Phospho; S527: Phospho; S530: Phospho	FALSE	['NA']	FALSE	0	HCD	No	N/A	N/A	N/A	N/A	2	37.04	496	449	430	999	349	742	398	440	496	449	430
ILIVTQTPHYMR|T7: Phospho; M11: Oxidation	31	gi|39725634|ref|NP_056130.2|; gi|61102725|ref|NP_291029.2|	2	la related protein isoform 1 [Homo sapiens]; la related protein isoform 2 [Homo sapiens]	142345; 150299	142345	7	43	ILIVTQTPHYMR	T7: Phospho; M11: Oxidation	T572: Phospho; M576: Oxidation	624.662	3	1870.97	-0.00403	43.81	1	566	577	K	R	0	2012-08-10-Look-iTRAQ-pST-20-70.2894.2894.3.dta - 624.66280|747|1494|1715|779|1223|837|1742|600	896	['LARP1', 'unresolved: gi|61102725|ref|NP_291029.2|']	T572: Phospho	FALSE	['NA']	FALSE	0	HCD	No	N/A	N/A	N/A	N/A	6	43.81	2515	4056	5091	2729	3593	3211	3823	2587	747	1494	1715
SLSDSESDDSK|S3: Phospho	49	gi|15082258|ref|NP_009207.2|; gi|20544151|ref|NP_057671.2|	2	chromobox homolog 3 [Homo sapiens]	28879	28879	7	44	SLSDSESDDSK	S3: Phospho	S95: Phospho	929.432	2	1856.85	-0.001541	19.86	1	93	103	K	S	0	2012-08-10-Look-iTRAQ-pST-0-700.2620.2620.2.dta - 929.43160|1108|638|3733|2314|573|2490|414|669	2209	['CBX3']	S95: Phospho				0.00311526	CID	No	N/A	N/A	N/A	N/A	3	38.49	3182	1929	7947	5370	1656	5425	1237	1733	1108	638	3733
IEDVTPIPSDSTRR|T12: Phospho	112	gi|5032051|ref|NP_005608.1|; gi|68160915|ref|NP_001020241.1|; gi|68160922|ref|NP_001020242.1|	3	ribosomal protein S14 [Homo sapiens]	20388	20388	1	22	IEDVTPIPSDSTRR	T12: Phospho	T140: Phospho	657.334	3	1968.98	-0.00333	22.1	1	129	142	R	K	1	2012-08-10-Look-iTRAQ-pST-11-700.3281.3281.3.dta - 657.33310|211|211|603|277|1929|724|596|1052	1076	['RPS14']	T140: Phospho	FALSE	['NA']	FALSE	0	HCD	No	N/A	N/A	N/A	N/A	1	22.1	211	211	603	277	1929	724	596	1052	211	211	603
VPASPLPGLER|S4: Phospho	115	gi|86990441|ref|NP_059672.2|; gi|254028232|ref|NP_004945.4|; gi|254028234|ref|NP_001034558.2|; gi|254028237|ref|NP_001156768.1|; gi|254028240|ref|NP_001156769.1|	5	MAP/microtubule affinity-regulating kinase 2 isoform a [Homo sapiens]; MAP/microtubule affinity-regulating kinase 2 isoform c [Homo sapiens]; MAP/microtubule affinity-regulating kinase 2 isoform d [Homo sapiens]; MAP/microtubule affinity-regulating kinase 2 isoform e [Homo sapiens]; MAP/microtubule affinity-regulating kinase 2 isoform f [Homo sapiens]	100800; 98840; 106203; 97974; 96755	100800	2	23	VPASPLPGLER	S4: Phospho	S422: Phospho	760.414	2	1518.81	0.002437	16.59	1	419	429	K	K	0	2012-08-10-Look-iTRAQ-pST-13-230.4220.4220.2.dta - 760.41460|440|535|1046|697|925|1225|890|417	988	['MARK2']	S422: Phospho	TRUE	['sp|Q7KZI7|MARK2_HUMAN Serine/threonine-protein kinase MARK2 OS=Homo sapiens GN=MARK2 PE=1 SV=2']	TRUE	0.00833333	CID	No	N/A	N/A	N/A	N/A	2	22.58	651	746	1504	908	1136	1678	1101	714	440	535	1046
CSSCEPFPDGATNNLSR|S16: Phospho	88	gi|4502379|ref|NP_003912.1|	1	B-cell CLL/lymphoma 10 [Homo sapiens]	31388	31388	1	36	CSSCEPFPDGATNNLSR	S16: Phospho	S134: Phospho	765.994	3	2294.96	0.001044	35.55	1	119	135	K	S	0	2012-08-10-Look-iTRAQ-pST-11-230.4126.4126.3.dta - 765.99500|316|200|533|431|448|551|428|200	2573	['BCL10']	S134: Phospho	FALSE	['NA']	FALSE	0	HCD	Yes	Yes	Yes	25.66	9.89	1	35.55	316	200	533	431	448	551	428	200	316	200	533
AQSLVISPPAPSPR|S12: Phospho	29	gi|103472005|ref|NP_002408.3|; gi|225543215|ref|NP_001139438.1|	2	antigen identified by monoclonal antibody Ki-67 isoform 1 [Homo sapiens]; antigen identified by monoclonal antibody Ki-67 isoform 2 [Homo sapiens]	474775; 423209	474775	4	66	AQSLVISPPAPSPR	S12: Phospho	S584: Phospho	902.484	2	1802.96	-0.005556	47.97	1	573	586	K	K	0	2012-08-10-Look-iTRAQ-pST-15-70.4063.4063.2.dta - 902.48410|3074|583|555|5365|1930|1365|648|7141	1615	['MKI67']	S584: Phospho	FALSE	['NA']	FALSE	0	HCD	Yes	Yes	Yes	45.65	2.32	3	54.3	4070	1265	971	6640	2814	2360	1173	9162	3074	583	555
QSSPSGSEQLVR|S3: Phospho	53	gi|148298722|ref|NP_009081.2|	1	zinc finger protein 185 [Homo sapiens]	86257	86257	2	31	QSSPSGSEQLVR	S3: Phospho	S453: Phospho	829.905	2	1657.8	-0.003445	28.54	1	451	462	R	R	0	2012-08-10-Look-iTRAQ-pST-9-230.2880.2880.2.dta - 829.90480|1637|3443|210|1274|210|634|4486|1183	1827	['ZNF185']	S453: Phospho				0	CID	No	N/A	N/A	N/A	N/A	2	42.6	2116	4696	521	1795	415	903	5662	1694	1637	3443	210
SEAAAPHTDAGGGLSSDEEEGTSSQAEAAR|S15: Phospho; S16: Phospho	9	gi|224809295|ref|NP_004619.3|; gi|224809302|ref|NP_001139241.1|	2	xeroderma pigmentosum, complementation group C isoform 1 [Homo sapiens]; xeroderma pigmentosum, complementation group C isoform 2 [Homo sapiens]	135338; 130931	135338	4	56	SEAAAPHTDAGGGLSSDEEEGTSSQAEAAR	S15: Phospho; S16: Phospho	S883: Phospho; S884: Phospho	838.853	4	3351.37	0.012092	42.34	1	869	898	K	I	0	2012-08-10-Look-iTRAQ-pST-17p5-700.2377.2377.4.dta - 838.85410|208|208|414|208|208|208|208|208	806	['XPC']	S883: Phospho; S884: Phospho	FALSE	['NA']	FALSE	0	HCD	Yes	Yes	Yes	31.8	10.54	7	56.08	421	421	627	421	421	567	421	421	208	208	414
GPPSPPAPVMHSPSRK|S4: Phospho; S12: Phospho	204	gi|6912676|ref|NP_036377.1|	1	SKI-interacting protein [Homo sapiens]	77941	77941	1	14	GPPSPPAPVMHSPSRK	S4: Phospho; S12: Phospho	S224: Phospho; S232: Phospho	603.304	4	2409.19	-0.0032	13.77	1	221	236	R	M	1	2012-08-10-Look-iTRAQ-pST-13-230.2644.2644.4.dta - 603.30440|394|211|211|211|211|211|211|542	2006	['SNW1']	S224: Phospho; S232: Phospho	FALSE	['NA']	FALSE	0.00282486	HCD	No	N/A	N/A	N/A	N/A	1	13.77	394	211	211	211	211	211	211	542	394	211	211
RPDHSGGSPSPPTSEPAR|S8: Phospho; S10: Phospho	102	gi|21314720|ref|NP_078976.2|	1	Smad nuclear interacting protein [Homo sapiens]	54021	54021	1	43	RPDHSGGSPSPPTSEPAR	S8: Phospho; S10: Phospho	S52: Phospho; S54: Phospho	766.005	3	2295	-0.004514	43.11	1	45	62	R	S	0	2012-08-10-Look-iTRAQ-pST-0-700.1991.1991.3.dta - 766.00540|207|207|674|466|407|591|207|207	2870	['SNIP1']	S52: Phospho; S54: Phospho				0	HCD	Yes	Yes	Yes	19.02	24.09	1	43.11	207	207	674	466	407	591	207	207	207	207	674
SPNELVDDLFK|S1: Phospho	21	gi|20149635|ref|NP_057227.2|; gi|29568099|ref|NP_061327.2|	2	p47 protein isoform a [Homo sapiens]; p47 protein isoform b [Homo sapiens]	46024; 42474	46024	1	44	SPNELVDDLFK	S1: Phospho	S114: Phospho	655.675	3	1964.01	-0.008877	44.02	1	114	124	K	G	0	2012-08-10-Look-iTRAQ-pST-15-700.4273.4273.3.dta - 655.67700|1879|4199|5622|4118|6939|5998|9637|2052	525	['NSFL1C']	S114: Phospho	FALSE	['NA']	FALSE	0	HCD	No	N/A	N/A	N/A	N/A	1	44.02	1879	4199	5622	4118	6939	5998	9637	2052	1879	4199	5622
TPPSEEDSAEAER|S4: Phospho	24	gi|4506921|ref|NP_003012.1|	1	small glutamine-rich tetratricopeptide [Homo sapiens]	38833	38833	3	55	TPPSEEDSAEAER	S4: Phospho	S84: Phospho	601.265	3	1800.77	0.002547	37.82	1	81	93	R	L	0	2012-08-10-Look-iTRAQ-pST-0-700.2332.2332.3.dta - 601.26550|928|1378|2472|1601|1518|2248|1316|969	2037	['SGTA']	S84: Phospho				0	CID	Yes	Yes	T1: Phospho	33.46	4.36	1	37.82	928	1378	2472	1601	1518	2248	1316	969	928	1378	2472
DVTNFTVGGFAPMSPR|T6: Phospho	8	gi|20149524|ref|NP_003160.2|; gi|161169023|ref|NP_001104490.1|; gi|195546900|ref|NP_001124296.1|; gi|195546902|ref|NP_001124297.1|	4	suppressor of Ty 5 homolog isoform a [Homo sapiens]; suppressor of Ty 5 homolog isoform b [Homo sapiens]	140489; 139988	140489	8	60	DVTNFTVGGFAPMSPR	T6: Phospho	T658: Phospho	694.001	3	2078.98	-0.000615	10.21	1	653	668	R	I	0	2012-08-10-Look-iTRAQ-pST-20-70.3765.3765.3.dta - 694.00200|210|210|210|210|210|409|305|322	1047	['SUPT5H']	T658: Phospho	FALSE	['NA']	FALSE	0.00649351	HCD	No	N/A	N/A	N/A	N/A	1	10.21	210	210	210	210	210	409	305	322	210	210	210
KAENQNESSQGK|S8: Phospho	186	gi|33636698|ref|NP_036422.3|; gi|211971036|ref|NP_001130026.1|; gi|211971038|ref|NP_001130027.1|	3	tousled-like kinase 1 isoform 1 [Homo sapiens]; tousled-like kinase 1 isoform 2 [Homo sapiens]; tousled-like kinase 1 isoform 3 [Homo sapiens]	105164; 100395; 95523	105164	1	17	KAENQNESSQGK	S8: Phospho	S133: Phospho	578.802	4	2311.19	-0.016159	16.61	1	126	137	R	S	1	2012-08-10-Look-iTRAQ-pST-9-700.1707.1707.4.dta - 578.80190|577|530|1146|719|783|1339|782|566	1777	['TLK1']	S133: Phospho	TRUE	['sp|Q9UKI8|TLK1_HUMAN Serine/threonine-protein kinase tousled-like 1 OS=Homo sapiens GN=TLK1 PE=1 SV=2']	TRUE	0	HCD	No	N/A	N/A	N/A	N/A	1	16.61	577	530	1146	719	783	1339	782	566	577	530	1146
ASQEANLLTLAQK|S2: Phospho	63	gi|44890062|ref|NP_919254.2|; gi|112807226|ref|NP_001036783.1|	2	hypothetical protein LOC91748 [Homo sapiens]	133988	133988	1	44	ASQEANLLTLAQK	S2: Phospho	S461: Phospho	692.385	3	2074.13	0.004334	43.83	1	460	472	R	A	0	2012-08-10-Look-iTRAQ-pST-15-230.4144.4144.3.dta - 692.38440|541|890|1369|667|773|1761|1391|628	1501	['C14orf43']	S461: Phospho	FALSE	['NA']	FALSE	0	HCD	Yes	Yes	Yes	16.29	27.54	1	43.83	541	890	1369	667	773	1761	1391	628	541	890	1369
SFQDYTGQK|S1: Phospho	123	gi|21361576|ref|NP_057589.2|	1	zinc finger, CCHC domain containing 17 [Homo sapiens]	40975	40975	1	20	SFQDYTGQK	S1: Phospho	S114: Phospho	587.959	3	1760.86	-0.005557	20.47	1	114	122	R	I	0	2012-08-10-Look-iTRAQ-pST-11-700.2796.2796.3.dta - 587.95870|726|525|376|1536|639|1254|1300|577	814	['ZCCHC17']	S114: Phospho	FALSE	['NA']	FALSE	0	HCD	No	N/A	N/A	N/A	N/A	1	20.47	726	525	376	1536	639	1254	1300	577	726	525	376
KVIYSQPSAR|S8: Phospho	167	gi|8393638|ref|NP_058642.1|	1	F11 receptor precursor [Homo sapiens]	38133	38133	1	23	KVIYSQPSAR	S8: Phospho	S284: Phospho	613.008	3	1836.01	-0.010766	24.18	1	277	286	K	S	1	2012-08-10-Look-iTRAQ-pST-15-70.2344.2344.3.dta - 613.00840|3963|4408|2541|7479|5030|4280|4664|5244	1667	['F11R']	S284: Phospho	FALSE	['NA']	FALSE	0.00364964	HCD	No	N/A	N/A	N/A	N/A	1	24.18	3963	4408	2541	7479	5030	4280	4664	5244	3963	4408	2541
SVSPPPKR|S1: Phospho; S3: Phospho	221	gi|20127499|ref|NP_006266.2|	1	arginine/serine-rich splicing factor 6 [Homo sapiens]	47891	47891	2	10	SVSPPPKR	S1: Phospho; S3: Phospho	S314: Phospho; S316: Phospho	545.953	3	1634.84	-0.004877	8.26	1	314	321	R	A	1	2012-08-10-Look-iTRAQ-pST-9-700.1992.1992.3.dta - 545.95280|960|1703|4562|2318|3064|2630|943|1986	851	['SRSF6']	S314: Phospho; S316: Phospho	FALSE	['NA']	FALSE	0.00540541	HCD	No	N/A	N/A	N/A	N/A	2	10.42	1795	3062	7766	4086	5063	4568	1539	3331	960	1703	4562
EESSEDENEVSNILR|S4: Phospho	95	gi|40807496|ref|NP_955356.1|; gi|156630992|ref|NP_001096123.1|	2	OTU domain containing 4 protein isoform 1 [Homo sapiens]; OTU domain containing 4 protein isoform 3 [Homo sapiens]	138365; 138493	138365	1	34	EESSEDENEVSNILR	S4: Phospho	S958: Phospho	711.987	3	2132.94	-0.002344	34.3	1	955	969	K	S	0	2012-08-10-Look-iTRAQ-pST-9-700.4470.4470.3.dta - 711.98770|300|204|204|368|204|204|204|204	1655	['unresolved: gi|40807496|ref|NP_955356.1|', 'OTUD4']	S958: Phospho	FALSE	['NA']	FALSE	0	HCD	Yes	Yes	S3: Phospho	27.8	6.5	1	34.3	300	204	204	368	204	204	204	204	300	204	204
TDSVIIADQTPTPTR|T12: Phospho	43	gi|5802980|ref|NP_006847.1|; gi|194239640|ref|NP_001123531.1|; gi|194239643|ref|NP_001123532.1|	3	activating transcription factor 7 isoform 2 [Homo sapiens]; activating transcription factor 7 isoform 1 [Homo sapiens]; activating transcription factor 7 isoform 3 [Homo sapiens]	59729; 61547; 56957	59729	1	47	TDSVIIADQTPTPTR	T12: Phospho	T53: Phospho	667.007	3	1998	0.000215	46.57	1	42	56	R	F	0	2012-08-10-Look-iTRAQ-pST-11-230.4022.4022.3.dta - 667.00710|494|920|820|579|691|794|1189|517	2320	['ATF7']	T53: Phospho	FALSE	['NA']	FALSE	0	HCD	Yes	Yes	Yes	29.85	16.72	1	46.57	494	920	820	579	691	794	1189	517	494	920	820
GTGASGSFK|S7: Phospho	75	gi|4885373|ref|NP_005316.1|; gi|20544168|ref|NP_005314.2|; gi|4885375|ref|NP_005310.1|; gi|4885377|ref|NP_005311.1|; gi|4885379|ref|NP_005312.1|; gi|4885381|ref|NP_005313.1|	6	histone cluster 1, H1a [Homo sapiens]; histone cluster 1, H1t [Homo sapiens]; histone cluster 1, H1c [Homo sapiens]; histone cluster 1, H1d [Homo sapiens]; histone cluster 1, H1e [Homo sapiens]; histone cluster 1, H1b [Homo sapiens]	39473; 34478; 39604; 41197; 41017; 42644	39473	1	40	GTGASGSFK	S7: Phospho	S107: Phospho	500.594	3	1498.76	-0.004694	40.08	1	101	109	K	L	0	2012-08-10-Look-iTRAQ-pST-9-700.2312.2312.3.dta - 500.59400|210|351|744|566|3934|1415|555|3540	657	['HIST1H1A', 'HIST1H1T', 'HIST1H1C', 'HIST1H1D', 'HIST1H1E', 'HIST1H1B']	S107: Phospho	FALSE	['NA']	FALSE	0	HCD	Yes	Yes	Yes	33.25	6.83	1	40.08	210	351	744	566	3934	1415	555	3540	210	351	744
HSSISPVRLPLNSSLGAELSR|S3: Phospho; S5: Phospho	65	gi|157817023|ref|NP_057591.2|; gi|157817073|ref|NP_055898.1|	2	Cdc2-related kinase, arginine/serine-rich isoform 1 [Homo sapiens]; Cdc2-related kinase, arginine/serine-rich isoform 2 [Homo sapiens]	201547; 200565	201547	1	37	HSSISPVRLPLNSSLGAELSR	S3: Phospho; S5: Phospho	S383: Phospho; S385: Phospho	671.842	4	2683.34	6.1e-05	37.29	1	381	401	R	K	1	2012-08-10-Look-iTRAQ-pST-17p5-230.3791.3791.4.dta - 671.84280|213|213|454|213|213|398|213|213	1160	['CDK12']	S383: Phospho; S385: Phospho	TRUE	['sp|Q9NYV4|CDK12_HUMAN Cyclin-dependent kinase 12 OS=Homo sapiens GN=CDK12 PE=1 SV=2']	TRUE	0	HCD	No	N/A	N/A	N/A	N/A	1	37.29	213	213	454	213	213	398	213	213	213	213	454
QISESTNHIYSNLANCSPNR|S17: Phospho	79	gi|4557695|ref|NP_000213.1|; gi|148005039|ref|NP_001087241.1|	2	v-kit Hardy-Zuckerman 4 feline sarcoma viral oncogene homolog isoform 1 precursor [Homo sapiens]; v-kit Hardy-Zuckerman 4 feline sarcoma viral oncogene homolog isoform 2 precursor [Homo sapiens]	131544; 130827	131544	3	22	QISESTNHIYSNLANCSPNR	S17: Phospho	S943: Phospho	897.081	3	2688.23	-0.004422	17.15	1	927	946	K	Q	0	2012-08-10-Look-iTRAQ-pST-17p5-230.2696.2696.3.dta - 897.08250|209|528|282|534|209|237|437|209	1162	['KIT']	S943: Phospho	TRUE	['sp|P10721|KIT_HUMAN Mast/stem cell growth factor receptor Kit OS=Homo sapiens GN=KIT PE=1 SV=1']	TRUE	0	CID	Yes	Yes	Yes	11.98	5.17	4	40.2	836	1155	909	1206	995	1047	1227	836	209	528	282
GLSWDSGPEEPGPR|S3: Phospho	99	gi|148728182|ref|NP_569056.3|; gi|148747864|ref|NP_001092049.1|; gi|154091332|ref|NP_001093633.1|; gi|154091334|ref|NP_001093637.1|	4	JAW1-related protein isoform b [Homo sapiens]; JAW1-related protein isoform a [Homo sapiens]; JAW1-related protein isoform c [Homo sapiens]	107755; 116056; 78709	107755	1	33	GLSWDSGPEEPGPR	S3: Phospho	S303: Phospho	623.288	3	1866.85	-0.004714	33.39	1	301	314	R	L	0	2012-08-10-Look-iTRAQ-pST-9-700.3998.3998.3.dta - 623.28800|601|872|980|2685|1234|1514|502|977	1193	['MRVI1']	S303: Phospho	FALSE	['NA']	FALSE	0	HCD	No	N/A	N/A	N/A	N/A	1	33.39	601	872	980	2685	1234	1514	502	977	601	872	980
SLSLPGLR|S3: Phospho	197	gi|125628665|ref|NP_001013002.2|	1	hypothetical protein LOC388284 [Homo sapiens]	39802	39802	1	14	SLSLPGLR	S3: Phospho	S114: Phospho	613.844	2	1225.67	9.5e-05	14.08	1	112	119	K	A	0	2012-08-10-Look-iTRAQ-pST-17p5-70.4036.4036.2.dta - 613.84280|4423|6335|8820|6942|5758|10757|5202|5932	580	['C16orf86']	S114: Phospho	FALSE	['NA']	FALSE	0.00578035	HCD	No	N/A	N/A	N/A	N/A	1	14.08	4423	6335	8820	6942	5758	10757	5202	5932	4423	6335	8820
KPIETGSPK|S7: Phospho	120	gi|4759100|ref|NP_004759.1|	1	splicing factor, arginine/serine-rich 11 [Homo sapiens]	69747	69747	1	20	KPIETGSPK	S7: Phospho	S449: Phospho	488.033	4	1948.12	-0.012025	20.4	1	443	451	K	T	0	2012-08-10-Look-iTRAQ-pST-11-700.2239.2239.4.dta - 488.03340|203|637|905|693|701|405|392|203	1056	['SRSF11']	S449: Phospho	FALSE	['NA']	FALSE	0	HCD	No	N/A	N/A	N/A	N/A	1	20.4	203	637	905	693	701	405	392	203	203	637	905
SRESLNVDVVK|S1: Phospho	190	gi|33620730|ref|NP_005543.2|; gi|110735431|ref|NP_891553.2|; gi|194306559|ref|NP_001123579.1|	3	kinesin light chain 1 isoform 1 [Homo sapiens]; kinesin light chain 1 isoform 2 [Homo sapiens]; kinesin light chain 1 isoform 3 [Homo sapiens]	81572; 82818; 88735	81572	1	19	SRESLNVDVVK	S1: Phospho	S521: Phospho	645.355	3	1933.05	-0.007198	19.01	1	521	531	R	Y	1	2012-08-10-Look-iTRAQ-pST-11-230.3986.3986.3.dta - 645.35520|456|1827|921|1135|1020|952|1166|803	2206	['KLC1']	S521: Phospho	FALSE	['NA']	FALSE	0.00914634	HCD	No	N/A	N/A	N/A	N/A	1	19.01	456	1827	921	1135	1020	952	1166	803	456	1827	921
EVSDSEAGGGPQGER|S5: Phospho	38	gi|21396500|ref|NP_003600.2|	1	HIRA interacting protein 3 [Homo sapiens]	79298	79298	2	66	EVSDSEAGGGPQGER	S5: Phospho	S372: Phospho	620.275	3	1857.8	-0.002283	56.21	1	368	382	R	K	0	2012-08-10-Look-iTRAQ-pST-0-700.2231.2231.3.dta - 620.27480|618|552|1675|1262|1191|1841|551|789	2214	['HIRIP3']	S372: Phospho				0	HCD	Yes	Yes	S3: Phospho	47.58	8.63	1	56.21	618	552	1675	1262	1191	1841	551	789	618	552	1675
TSPTPGDFPK|S2: Phospho	175	gi|194018476|ref|NP_055894.6|; gi|194018478|ref|NP_653173.1|	2	TBC1 domain family, member 2B isoform b [Homo sapiens]; TBC1 domain family, member 2B isoform a [Homo sapiens]	124309; 130878	124309	1	21	TSPTPGDFPK	S2: Phospho	S155: Phospho	578.965	3	1733.89	-0.011734	21.11	1	154	163	R	G	0	2012-08-10-Look-iTRAQ-pST-11-230.3749.3749.3.dta - 578.96550|944|969|1579|860|1949|1413|1879|1125	1852	['TBC1D2B']	S155: Phospho	FALSE	['NA']	FALSE	0.00666667	HCD	No	N/A	N/A	N/A	N/A	1	21.11	944	969	1579	860	1949	1413	1879	1125	944	969	1579
SIDDEITEAKSGTATPQR|T13: Phospho; T15: Phospho	189	gi|94557299|ref|NP_996790.3|; gi|94557301|ref|NP_006242.5|	2	protein kinase, AMP-activated, alpha 1 catalytic subunit isoform 2 [Homo sapiens]; protein kinase, AMP-activated, alpha 1 catalytic subunit isoform 1 [Homo sapiens]	78885; 76460	78885	1	25	SIDDEITEAKSGTATPQR	T13: Phospho; T15: Phospho	T503: Phospho; T505: Phospho	672.573	4	2686.27	-0.006421	24.95	1	491	508	R	S	1	2012-08-10-Look-iTRAQ-pST-0-700.4484.4484.4.dta - 672.57350|209|209|209|209|209|498|209|630	3043	['PRKAA1']	T503: Phospho; T505: Phospho				0	HCD	No	N/A	N/A	N/A	N/A	1	24.95	209	209	209	209	209	498	209	630	209	209	209
KASGSENEGDYNPGRK|S3: Phospho; S5: Phospho	5	gi|19913408|ref|NP_001059.2|	1	DNA topoisomerase II, beta isozyme [Homo sapiens]	240708	240708	4	89	KASGSENEGDYNPGRK	S3: Phospho; S5: Phospho	S1545: Phospho; S1547: Phospho	557.072	5	2780.33	-0.003971	16.46	1	1543	1558	R	T	2	2012-08-10-Look-iTRAQ-pST-9-700.2308.2308.5.dta - 557.07270|208|208|491|208|208|425|208|208	2063	['TOP2B']	S1545: Phospho; S1547: Phospho	FALSE	['NA']	FALSE	0	HCD	No	N/A	N/A	N/A	N/A	1	16.46	208	208	491	208	208	425	208	208	208	208	491
LSPGESAYQK|S2: Phospho	80	gi|145386517|ref|NP_597728.1|; gi|199559805|ref|NP_001128342.1|	2	phostensin [Homo sapiens]	76096	76096	1	29	LSPGESAYQK	S2: Phospho	S224: Phospho	589.976	3	1766.91	-0.001777	29.42	1	223	232	R	L	0	2012-08-10-Look-iTRAQ-pST-11-700.2666.2666.3.dta - 589.97560|209|1058|618|739|1666|664|988|732	817	['KIAA1949']	S224: Phospho	FALSE	['NA']	FALSE	0	HCD	Yes	Yes	Yes	22.19	7.23	1	29.42	209	1058	618	739	1666	664	988	732	209	1058	618
NVALLSQLYHSPAR|S11: Phospho	5	gi|38201714|ref|NP_001410.2|	1	ELAV-like 1 [Homo sapiens]	42020	42020	1	66	NVALLSQLYHSPAR	S11: Phospho	S202: Phospho	651.68	3	1952.02	0.000379	66.71	1	192	205	K	R	0	2012-08-10-Look-iTRAQ-pST-20-70.3354.3354.3.dta - 651.68040|339|329|639|692|638|573|531|213	957	['ELAVL1']	S202: Phospho	FALSE	['NA']	FALSE	0	HCD	No	N/A	N/A	N/A	N/A	1	66.71	339	329	639	692	638	573	531	213	339	329	639
GSETPGATPGSK|S2: Phospho	169	gi|54112117|ref|NP_036565.2|	1	splicing factor 3b, subunit 1 isoform 1 [Homo sapiens]	172337	172337	1	21	GSETPGATPGSK	S2: Phospho	S242: Phospho	592.967	3	1775.89	-0.012145	20.58	1	241	252	K	I	0	2012-08-10-Look-iTRAQ-pST-9-230.2130.2130.3.dta - 592.96730|596|426|1427|1117|1708|1175|500|802	2083	['SF3B1']	S242: Phospho				0.0030303	HCD	No	N/A	N/A	N/A	N/A	1	20.58	596	426	1427	1117	1708	1175	500	802	596	426	1427
RESLFSAR|S3: Phospho; S6: Phospho	115	gi|30023826|ref|NP_835230.1|	1	G-protein coupled purinergic receptor P2Y8 [Homo sapiens]	43118	43118	2	41	RESLFSAR	S3: Phospho; S6: Phospho	S324: Phospho; S327: Phospho	477.222	3	1428.65	-0.002831	23.9	1	322	329	R	T	1	2012-08-10-Look-iTRAQ-pST-0-700.3852.3852.3.dta - 477.22200|323|453|1184|945|676|700|416|202	1113	['P2RY8']	S324: Phospho; S327: Phospho				0	HCD	No	N/A	N/A	N/A	N/A	1	23.9	323	453	1184	945	676	700	416	202	323	453	1184
AVSEGCASEDEVEGEA|S8: Phospho	20	gi|222352143|ref|NP_060891.3|	1	TBC1 domain family, member 2 [Homo sapiens]	121075	121075	1	34	AVSEGCASEDEVEGEA	S8: Phospho	S909: Phospho	1011.91	2	2021.81	0.00611	33.5	1	902	917	R	-	0	2012-08-10-Look-iTRAQ-pST-20-700.2648.2648.2.dta - 1011.91520|207|345|207|411|207|207|207|207	505	['TBC1D2']	S909: Phospho	FALSE	['NA']	FALSE	0	CID	No	N/A	N/A	N/A	N/A	1	33.5	207	345	207	411	207	207	207	207	207	345	207
ELIPQESPR|S7: Phospho	134	gi|13027630|ref|NP_073210.1|	1	DiGeorge syndrome critical region protein 14 [Homo sapiens]	61719	61719	1	36	ELIPQESPR	S7: Phospho	S292: Phospho	484.919	3	1451.73	0.001499	35.97	1	286	294	K	V	0	2012-08-10-Look-iTRAQ-pST-0-700.4035.4035.3.dta - 484.91870|210|210|428|210|210|386|210|210	1175	['DGCR14']	S292: Phospho				0	HCD	No	N/A	N/A	N/A	N/A	1	35.97	210	210	428	210	210	386	210	210	210	210	428
HGAPAAPSPPPR|S8: Phospho	46	gi|167614488|ref|NP_056342.3|	1	TBC1 domain family, member 10B [Homo sapiens]	100739	100739	2	50	HGAPAAPSPPPR	S8: Phospho	S22: Phospho	513.597	3	1537.77	-0.000773	25.1	1	15	26	R	G	0	2012-08-10-Look-iTRAQ-pST-9-230.2256.2256.3.dta - 513.59750|530|877|1874|654|1681|1498|767|1462	1558	['TBC1D10B']	S22: Phospho				0	HCD	No	N/A	N/A	N/A	N/A	1	25.1	530	877	1874	654	1681	1498	767	1462	530	877	1874
TPAFAESVTEGDVR|S7: Phospho	16	gi|19923748|ref|NP_001924.2|	1	dihydrolipoamide S-succinyltransferase (E2 component of 2-oxo-glutarate complex) [Homo sapiens]	57584	57584	1	72	TPAFAESVTEGDVR	S7: Phospho	S81: Phospho	621.628	3	1861.88	-0.01506	72.42	1	75	88	K	W	0	2012-08-10-Look-iTRAQ-pST-9-700.3789.3789.3.dta - 621.62740|591|1263|1230|1007|1134|899|463|1581	1185	['DLST']	S81: Phospho	FALSE	['NA']	FALSE	0	HCD	Yes	Yes	Yes	33.94	38.48	1	72.42	591	1263	1230	1007	1134	899	463	1581	591	1263	1230
SPDKPGGSPSASR|S1: Phospho	173	gi|157694511|ref|NP_056473.2|	1	nucleolar complex associated 2 homolog [Homo sapiens]	98788	98788	2	20	SPDKPGGSPSASR	S1: Phospho	S49: Phospho	483.5	4	1929.98	-0.00645	20.29	1	49	61	R	R	0	2012-08-10-Look-iTRAQ-pST-9-230.1917.1917.4.dta - 483.50010|792|462|1390|831|1092|1233|649|750	2434	['NOC2L']	S49: Phospho				0.00589971	HCD	No	N/A	N/A	N/A	N/A	1	20.29	792	462	1390	831	1092	1233	649	750	792	462	1390
AVDITTPK|T5: Phospho	155	gi|19923653|ref|NP_150091.2|; gi|190014586|ref|NP_066967.3|; gi|190014588|ref|NP_001121689.1|	3	PC4 and SFRS1 interacting protein 1 isoform 2 [Homo sapiens]; PC4 and SFRS1 interacting protein 1 isoform 1 [Homo sapiens]	86038; 54548	86038	1	24	AVDITTPK	T5: Phospho	T140: Phospho	511.62	3	1531.85	-0.009027	24.49	1	136	143	K	A	0	2012-08-10-Look-iTRAQ-pST-11-230.3460.3460.3.dta - 511.62040|870|400|1018|1806|1269|1186|571|640	1371	['PSIP1']	T140: Phospho	FALSE	['NA']	FALSE	0.00803213	HCD	No	N/A	N/A	N/A	N/A	1	24.49	870	400	1018	1806	1269	1186	571	640	870	400	1018
SSATSGDIWPGLSAYDNSPR|S18: Phospho	12	gi|169218320|ref|XP_001732863.1|; gi|117938251|ref|NP_001070908.1|; gi|117938254|ref|NP_001070909.1|; gi|7661958|ref|NP_055554.1|	4	PREDICTED: similar to BCL2-associated transcription factor 1 isoform 2 [Homo sapiens]; BCL2-associated transcription factor 1 isoform 2 [Homo sapiens]; BCL2-associated transcription factor 1 isoform 3 [Homo sapiens]; BCL2-associated transcription factor 1 isoform 1 [Homo sapiens]	127021; 127056; 106686; 134464	127021	2	47	SSATSGDIWPGLSAYDNSPR	S18: Phospho	S220: Phospho	822.379	3	2464.12	-0.007127	37.53	1	203	222	K	S	0	2012-08-10-Look-iTRAQ-pST-20-230.3397.3397.3.dta - 822.38130|934|725|1316|3406|1343|1467|1223|972	789	['unresolved: gi|169218320|ref|XP_001732863.1|', 'BCLAF1']	S220: Phospho	FALSE	['NA']	FALSE	0	CID	Yes	Yes	Yes	36.7	0.83	5	48.12	1682	1537	2187	4252	2950	2655	1835	1398	934	725	1316
SNESVDIQDQEEK|S4: Phospho	181	gi|56676335|ref|NP_060621.3|	1	RAP1 interacting factor 1 [Homo sapiens]	337910	337910	1	27	SNESVDIQDQEEK	S4: Phospho	S1579: Phospho	737.016	3	2208.04	-0.014061	26.98	1	1576	1588	K	V	0	2012-08-10-Look-iTRAQ-pST-0-700.3152.3152.3.dta - 737.01620|207|605|597|580|1259|1051|893|653	2803	['RIF1']	S1579: Phospho				0	HCD	Yes	Yes	S1: Phospho	19.93	7.05	1	26.98	207	605	597	580	1259	1051	893	653	207	605	597
LLPSVWSESEDGAGSPPPYR|S15: Phospho	48	gi|7710143|ref|NP_002375.1|; gi|156105673|ref|NP_056669.2|; gi|21464115|ref|NP_056670.2|; gi|21464117|ref|NP_056671.2|; gi|21464119|ref|NP_056723.2|	5	methyl-CpG binding domain protein 1 isoform 4 [Homo sapiens]; methyl-CpG binding domain protein 1 isoform 3 [Homo sapiens]; methyl-CpG binding domain protein 1 isoform 2 [Homo sapiens]; methyl-CpG binding domain protein 1 isoform 1 [Homo sapiens]; methyl-CpG binding domain protein 1 isoform PCM1 [Homo sapiens]	67071; 72929; 77810; 81565; 75409	67071	1	21	LLPSVWSESEDGAGSPPPYR	S15: Phospho	S343: Phospho	843.405	3	2527.19	-0.000511	22.59	1	329	348	R	R	0	2012-08-10-Look-iTRAQ-pST-17p5-700.3835.3835.3.dta - 843.40610|213|213|213|213|213|324|213|350	637	['MBD1']	S343: Phospho	FALSE	['NA']	FALSE	0	CID	Yes	Yes	Yes	18.52	4.07	1	22.59	213	213	213	213	213	324	213	350	213	213	213
AMTLSPQEEVAAGQMASSSR|S5: Phospho; M15: Oxidation	12	gi|5454102|ref|NP_006333.1|	1	transforming, acidic coiled-coil containing protein 3 [Homo sapiens]	107890	107890	1	55	AMTLSPQEEVAAGQMASSSR	S5: Phospho; M15: Oxidation	S317: Phospho; M327: Oxidation	817.712	3	2450.11	0.000409	55.03	1	313	332	R	S	0	2012-08-10-Look-iTRAQ-pST-11-230.4685.4685.3.dta - 817.71220|218|218|218|218|450|218|218|535	2623	['TACC3']	S317: Phospho	FALSE	['NA']	FALSE	0	CID	Yes	Yes	Yes	54.12	0.91	1	55.03	218	218	218	218	450	218	218	535	218	218	218
SKSPVGNPQLIQFSR|S3: Phospho	134	gi|85797660|ref|NP_055462.2|	1	limkain b1 [Homo sapiens]	231712	231712	1	28	SKSPVGNPQLIQFSR	S3: Phospho	S1093: Phospho	587.324	4	2345.27	-0.003454	28.23	1	1091	1105	R	E	1	2012-08-10-Look-iTRAQ-pST-17p5-70.3323.3323.4.dta - 587.32440|206|447|206|206|206|206|206|563	1619	['KIAA0430']	S1093: Phospho	FALSE	['NA']	FALSE	0	HCD	Yes	Yes	S1: Phospho	21.11	7.12	1	28.23	206	447	206	206	206	206	206	563	206	447	206
TEFLHSQNSLSPR|S11: Phospho	41	gi|206725523|ref|NP_006738.3|; gi|206725526|ref|NP_694985.29|	2	signal-induced proliferation-associated protein 1 [Homo sapiens]	120122	120122	2	52	TEFLHSQNSLSPR	S11: Phospho	S839: Phospho	633.98	3	1898.92	-0.001726	51.64	1	829	841	R	S	0	2012-08-10-Look-iTRAQ-pST-17p5-230.2591.2591.3.dta - 633.98010|1721|2790|2606|2132|1195|2033|1378|1983	781	['SIPA1']	S839: Phospho	FALSE	['NA']	FALSE	0	HCD	No	N/A	N/A	N/A	N/A	5	51.64	4177	6336	4919	5408	2634	4426	2973	4571	1721	2790	2606
YGPLSEPGSAR|S5: Phospho	152	gi|16445426|ref|NP_060353.2|	1	WD repeat domain 13 protein isoform 1 [Homo sapiens]	58872	58872	1	23	YGPLSEPGSAR	S5: Phospho	S70: Phospho	759.367	2	1516.72	-0.003218	23.57	1	66	76	R	A	0	2012-08-10-Look-iTRAQ-pST-9-230.4238.4238.2.dta - 759.36740|1778|4214|4245|2586|574|3305|824|2479	1510	['WDR13']	S70: Phospho				0	HCD	No	N/A	N/A	N/A	N/A	1	23.57	1778	4214	4245	2586	574	3305	824	2479	1778	4214	4245
AQSVSLEGSAPSPSPMHSHHHR|S3: Phospho	90	gi|24797103|ref|NP_722541.1|; gi|149158727|ref|NP_001092140.1|; gi|149158729|ref|NP_001092141.1|	3	RAS guanyl releasing protein 2 [Homo sapiens]	79186	79186	2	36	AQSVSLEGSAPSPSPMHSHHHR	S3: Phospho	S554: Phospho	544.86	5	2719.26	0.002743	36.19	1	552	573	R	A	0	2012-08-10-Look-iTRAQ-pST-15-230.2077.2077.5.dta - 544.86020|206|206|511|206|451|998|465|485	1820	['RASGRP2']	S554: Phospho	FALSE	['NA']	FALSE	0	HCD	No	N/A	N/A	N/A	N/A	1	36.19	206	206	511	206	451	998	465	485	206	206	511
SKSPVGNPQLIQFSR|S1: Phospho	102	gi|85797660|ref|NP_055462.2|	1	limkain b1 [Homo sapiens]	231712	231712	2	21	SKSPVGNPQLIQFSR	S1: Phospho	S1091: Phospho	782.764	3	2345.27	-0.002668	21.09	1	1091	1105	R	E	1	2012-08-10-Look-iTRAQ-pST-17p5-70.3303.3303.3.dta - 782.76370|493|707|623|905|603|1238|625|797	1620	['KIAA0430']	S1091: Phospho	FALSE	['NA']	FALSE	0.00699301	CID	No	N/A	N/A	N/A	N/A	1	21.09	493	707	623	905	603	1238	625	797	493	707	623
LIVENLSSR|S8: Phospho	94	gi|20127499|ref|NP_006266.2|; gi|21361282|ref|NP_005617.2|; gi|86991438|ref|NP_001034554.1|; gi|86991440|ref|NP_008856.2|	4	arginine/serine-rich splicing factor 6 [Homo sapiens]; splicing factor, arginine/serine-rich 4 [Homo sapiens]; splicing factor, arginine/serine-rich 5 [Homo sapiens]; splicing factor, arginine/serine-rich 5 [Homo sapiens]	47891; 73491; 36835; 36835	47891	2	34	LIVENLSSR	S8: Phospho	S119: Phospho	707.884	2	1413.75	-0.000102	10.03	1	112	120	R	C	0	2012-08-10-Look-iTRAQ-pST-15-230.3461.3461.2.dta - 707.88350|694|3531|3334|1059|1300|1070|1955|606	564	['SRSF6', 'SRSF4', 'SRSF5']	S119: Phospho	FALSE	['NA']	FALSE	0.00852273	HCD	No	N/A	N/A	N/A	N/A	2	34.43	904	4493	4568	1436	1510	1542	2527	816	694	3531	3334
GRDSPYQSR|S4: Phospho	192	gi|4506903|ref|NP_003760.1|	1	splicing factor, arginine/serine-rich 9 [Homo sapiens]	28378	28378	1	24	GRDSPYQSR	S4: Phospho	S204: Phospho	483.896	3	1448.67	-0.005323	25.05	1	201	209	R	G	1	2012-08-10-Look-iTRAQ-pST-0-700.1397.1397.3.dta - 483.89630|825|1292|2990|2010|948|2288|1620|344	1171	['SRSF9']	S204: Phospho				0	HCD	No	N/A	N/A	N/A	N/A	1	25.05	825	1292	2990	2010	948	2288	1620	344	825	1292	2990
RVSPLNLSSVTP|S3: Phospho	108	gi|118402596|ref|NP_004652.2|	1	cell division cycle protein 23 [Homo sapiens]	82365	82365	1	33	RVSPLNLSSVTP	S3: Phospho	S588: Phospho	551.965	3	1652.88	-0.007892	33.47	1	586	597	R	-	1	2012-08-10-Look-iTRAQ-pST-17p5-70.4128.4128.3.dta - 551.96490|1546|1237|1903|962|1168|1244|1153|1463	1069	['CDC23']	S588: Phospho	FALSE	['NA']	FALSE	0	HCD	No	N/A	N/A	N/A	N/A	1	33.47	1546	1237	1903	962	1168	1244	1153	1463	1546	1237	1903
SISPEVSASR|S3: Phospho	120	gi|149363685|ref|NP_056140.1|	1	hypothetical protein LOC23379 [Homo sapiens]	297302	297302	1	29	SISPEVSASR	S3: Phospho	S925: Phospho	708.852	2	1415.7	-0.007628	28.62	1	923	932	K	R	0	2012-08-10-Look-iTRAQ-pST-9-230.3279.3279.2.dta - 708.85190|1917|4344|6739|2252|6070|3960|5328|2908	1330	['KIAA0947']	S925: Phospho				0	HCD	No	N/A	N/A	N/A	N/A	1	28.62	1917	4344	6739	2252	6070	3960	5328	2908	1917	4344	6739
DHSPTPSVFNSDEER|T5: Phospho	139	gi|40254978|ref|NP_112179.2|; gi|201023339|ref|NP_001128409.1|; gi|201023341|ref|NP_001128410.1|	3	FIP1 like 1 isoform 1 [Homo sapiens]; FIP1 like 1 isoform 2 [Homo sapiens]; FIP1 like 1 isoform 3 [Homo sapiens]	76335; 75233; 66915	76335	2	34	DHSPTPSVFNSDEER	T5: Phospho	T494: Phospho	700.976	3	2099.91	-0.005713	34.17	1	490	504	R	Y	0	2012-08-10-Look-iTRAQ-pST-0-700.3509.3509.3.dta - 700.97550|211|211|1169|211|446|809|211|410	2722	['FIP1L1']	T494: Phospho				0	HCD	No	N/A	N/A	N/A	N/A	1	34.17	211	211	1169	211	446	809	211	410	211	211	1169
VSHSPPPKQR|S4: Phospho	2	gi|42542379|ref|NP_005830.2|	1	serine/arginine repetitive matrix 1 [Homo sapiens]	133664	133664	24	217	VSHSPPPKQR	S4: Phospho	S638: Phospho	607.668	3	1819.99	-0.009936	19.21	1	635	644	R	S	1	2012-08-10-Look-iTRAQ-pST-11-230.1464.1464.3.dta - 607.66840|2160|1153|7828|915|1697|3690|1555|1607	1997	['SRRM1']	S638: Phospho	FALSE	['NA']	FALSE	0.00617284	HCD	No	N/A	N/A	N/A	N/A	4	19.21	6338	3792	18804	3676	5673	11090	4953	5603	2160	1153	7828
HRHSPTGPPGFPR|T6: Phospho	65	gi|20127479|ref|NP_005667.2|	1	RNA binding motif protein 10 isoform 1 [Homo sapiens]	119326	119326	2	33	HRHSPTGPPGFPR	T6: Phospho	T91: Phospho	457.481	4	1825.9	-0.007508	17.46	1	86	98	R	D	1	2012-08-10-Look-iTRAQ-pST-13-230.2012.2012.4.dta - 457.48200|202|202|480|202|202|431|202|202	1508	['RBM10']	T91: Phospho	FALSE	['NA']	FALSE	0.00884956	CID	Yes	Yes	S4: Phospho	12.67	4.79	1	17.46	202	202	480	202	202	431	202	202	202	202	480
YYSDSDDELTVEQR|Y1: Phospho	21	gi|87299628|ref|NP_683692.2|	1	biorientation of chromosomes in cell division 1-like [Homo sapiens]	419436	419436	1	45	YYSDSDDELTVEQR	Y1: Phospho	Y480: Phospho	701.971	3	2102.9	-0.008262	46.95	1	480	493	K	R	0	2012-08-10-Look-iTRAQ-pST-13-700.3000.3000.3.dta - 701.97050|504|908|1341|758|1206|1044|678|876	991	['BOD1L']	Y480: Phospho	FALSE	['NA']	FALSE	0	CID	Yes	Yes	S3: Phospho	32.54	14.41	1	46.95	504	908	1341	758	1206	1044	678	876	504	908	1341
NFSFMNPGMER|S3: Phospho; M9: Oxidation	147	gi|5453976|ref|NP_006248.1|	1	protein kinase C, theta [Homo sapiens]	101355	101355	1	12	NFSFMNPGMER	S3: Phospho; M9: Oxidation	S695: Phospho; M701: Oxidation	577.247	3	1728.73	-0.011197	12.29	1	693	703	R	L	0	2012-08-10-Look-iTRAQ-pST-20-30.3758.3758.3.dta - 577.24780|1094|806|901|912|1461|808|1190|1180	1071	['PRKCQ']	S695: Phospho	TRUE	['sp|Q04759|KPCT_HUMAN Protein kinase C theta type OS=Homo sapiens GN=PRKCQ PE=1 SV=3']	TRUE	0.0077821	HCD	No	N/A	N/A	N/A	N/A	1	12.29	1094	806	901	912	1461	808	1190	1180	1094	806	901
GNAAGSSQTGDALGK|S6: Phospho	145	gi|4507391|ref|NP_003196.1|; gi|46370080|ref|NP_996919.1|; gi|46370082|ref|NP_996920.1|; gi|46370084|ref|NP_996921.1|; gi|46370086|ref|NP_996923.1|	5	transcription factor 12 isoform b [Homo sapiens]; transcription factor 12 isoform a [Homo sapiens]; transcription factor 12 isoform a [Homo sapiens]; transcription factor 12 isoform c [Homo sapiens]	81001; 84545; 84545; 61364	81001	1	24	GNAAGSSQTGDALGK	S6: Phospho	S332: Phospho	674.673	3	2021	-0.007831	24.43	1	327	341	R	A	0	2012-08-10-Look-iTRAQ-pST-9-230.3139.3139.3.dta - 674.67290|208|208|831|1280|852|1446|208|362	2569	['TCF12']	S332: Phospho				0	HCD	No	N/A	N/A	N/A	N/A	1	24.43	208	208	831	1280	852	1446	208	362	208	208	831
SISADDDLQESSR|S3: Phospho	30	gi|14670268|ref|NP_002895.3|	1	RD RNA-binding protein [Homo sapiens]	52150	52150	2	49	SISADDDLQESSR	S3: Phospho	S115: Phospho	903.905	2	1805.8	-0.002643	49.24	1	113	125	R	R	0	2012-08-10-Look-iTRAQ-pST-0-700.3413.3413.2.dta - 903.90530|845|1428|2150|1886|1572|2881|977|949	2046	['RDBP']	S115: Phospho				0	CID	Yes	Yes	Yes	8.87	40.37	2	52.18	1045	1777	2798	2736	2063	3787	1611	1305	845	1428	2150
RPSLPV|S3: Phospho	212	gi|242332496|ref|NP_055471.2|; gi|242332498|ref|NP_001156365.1|; gi|242332500|ref|NP_001156366.1|; gi|242332502|ref|NP_001156367.1|	4	hypothetical protein LOC9674 [Homo sapiens]	16580	16580	2	17	RPSLPV	S3: Phospho	S96: Phospho	526.794	2	1051.57	0.000468	14.61	1	94	99	K	-	0	2012-08-10-Look-iTRAQ-pST-11-230.3742.3742.2.dta - 526.79460|5587|14255|6562|9259|11788|5732|19787|5633	391	['KIAA0040']	S96: Phospho	FALSE	['NA']	FALSE	0.00963855	HCD	No	N/A	N/A	N/A	N/A	2	16.68	7033	16569	8382	10725	14533	7768	22742	7895	5587	14255	6562
HAEATLGSGNLR|S8: Phospho	55	gi|27735029|ref|NP_775739.1|; gi|148747437|ref|NP_060691.2|	2	MOB1, Mps One Binder kinase activator-like 1A [Homo sapiens]; Mob4B protein [Homo sapiens]	30721; 30406	30721	1	42	HAEATLGSGNLR	S8: Phospho	S38: Phospho	537.268	3	1608.79	-0.009713	42.31	1	31	42	K	M	0	2012-08-10-Look-iTRAQ-pST-11-230.2488.2488.3.dta - 537.26870|209|370|637|801|569|1163|209|598	1527	['MOBKL1A', 'MOBKL1B']	S38: Phospho	FALSE	['NA']	FALSE	0	HCD	Yes	Yes	Yes	33.72	8.59	1	42.31	209	370	637	801	569	1163	209	598	209	370	637
ASPAPGSGHPEGPGAHLDMNSLDR|S2: Phospho; M19: Oxidation	110	gi|54607135|ref|NP_055635.3|	1	translocase of outer mitochondrial membrane 70 homolog A [Homo sapiens]	86044	86044	3	12	ASPAPGSGHPEGPGAHLDMNSLDR	S2: Phospho; M19: Oxidation	S91: Phospho; M108: Oxidation	693.32	4	2769.25	0.001812	12.39	1	90	113	R	A	0	2012-08-10-Look-iTRAQ-pST-13-700.2454.2454.4.dta - 693.31960|395|600|1307|214|616|989|214|613	1346	['TOMM70A']	S91: Phospho	FALSE	['NA']	FALSE	0.00529101	HCD	No	N/A	N/A	N/A	N/A	3	12.39	948	1309	3235	890	1317	1780	628	1931	395	600	1307
VDDSTGTVISDVEEDAGELSR|T7: Phospho	141	gi|261878469|ref|NP_054740.3|; gi|261878471|ref|NP_001159765.1|; gi|261878473|ref|NP_001159766.1|; gi|261878475|ref|NP_001159767.1|; gi|261878552|ref|NP_001159889.1|	5	synovial sarcoma, X breakpoint 2 interacting protein isoform 1 [Homo sapiens]; synovial sarcoma, X breakpoint 2 interacting protein isoform 2 [Homo sapiens]; synovial sarcoma, X breakpoint 2 interacting protein isoform 2 [Homo sapiens]	89025; 85456; 85456	89025	1	16	VDDSTGTVISDVEEDAGELSR	T7: Phospho	T309: Phospho	860.06	3	2577.16	-0.005811	15.51	1	303	323	R	E	0	2012-08-10-Look-iTRAQ-pST-11-700.5347.5347.3.dta - 860.06040|208|208|208|322|208|306|208|208	1473	['SSX2IP']	T309: Phospho	FALSE	['NA']	FALSE	0	HCD	No	N/A	N/A	N/A	N/A	1	15.51	208	208	208	322	208	306	208	208	208	208	208
AGTFIAPPVYSNITPYQSHLRSPVR|S18: Phospho	39	gi|44890062|ref|NP_919254.2|; gi|112807226|ref|NP_001036783.1|	2	hypothetical protein LOC91748 [Homo sapiens]	133988	133988	2	25	AGTFIAPPVYSNITPYQSHLRSPVR	S18: Phospho	S632: Phospho	789.661	4	3154.63	-0.010935	26.87	1	615	639	K	L	1	2012-08-10-Look-iTRAQ-pST-22p5-30.3468.3468.4.dta - 789.66220|222|455|465|464|387|536|476|222	1319	['C14orf43']	S632: Phospho	FALSE	['NA']	FALSE	0	CID	Yes	Yes	Yes	24.63	2.24	1	26.87	222	455	465	464	387	536	476	222	222	455	465
NSASATTPLSGNSSRR|S13: Phospho	111	gi|5453726|ref|NP_006300.1|; gi|197276647|ref|NP_001127841.1|; gi|8923224|ref|NP_060194.1|	3	leucine rich repeat (in FLII) interacting protein 2 isoform 1 [Homo sapiens]; leucine rich repeat (in FLII) interacting protein 2 isoform 3 [Homo sapiens]; leucine rich repeat (in FLII) interacting protein 2 isoform 2 [Homo sapiens]	99081; 59938; 56147	99081	1	18	NSASATTPLSGNSSRR	S13: Phospho	S323: Phospho	498.251	4	1988.96	0.015903	17.78	1	311	326	R	G	1	2012-08-10-Look-iTRAQ-pST-11-700.2959.2959.4.dta - 498.25090|202|202|202|678|431|804|673|202	1085	['LRRFIP2']	S323: Phospho	FALSE	['NA']	FALSE	0.00543478	CID	Yes	NSATFKSFEDR	S7: Phospho	14.33	3.45	1	17.78	202	202	202	678	431	804	673	202	202	202	202
GPPDFSSDEEREPTPVLGSGAAAAGR|S6: Phospho; S7: Phospho	1	gi|4507555|ref|NP_003267.1|; gi|73760401|ref|NP_001027455.1|; gi|73760405|ref|NP_001027454.1|	3	thymopoietin isoform alpha [Homo sapiens]; thymopoietin isoform gamma [Homo sapiens]; thymopoietin isoform beta [Homo sapiens]	92747; 48810; 62256	92747	11	82	GPPDFSSDEEREPTPVLGSGAAAAGR	S6: Phospho; S7: Phospho	S66: Phospho; S67: Phospho	1012.12	3	3033.34	0.010644	24.52	1	61	86	K	S	1	2012-08-10-Look-iTRAQ-pST-11-700.4049.4049.3.dta - 1012.12450|204|204|204|598|601|204|204|204	1680	['TMPO']	S66: Phospho; S67: Phospho	FALSE	['NA']	FALSE	0.008	CID	No	N/A	N/A	N/A	N/A	2	24.9	413	413	413	913	810	413	413	413	204	204	204
AGGSAALSPSK|S8: Phospho	91	gi|5174449|ref|NP_006017.1|	1	H1 histone family, member X [Homo sapiens]	35250	35250	2	35	AGGSAALSPSK	S8: Phospho	S31: Phospho	545.294	3	1632.87	-0.008094	35.44	1	24	34	K	K	0	2012-08-10-Look-iTRAQ-pST-11-230.2298.2298.3.dta - 545.29490|1394|1287|2853|3511|2663|3306|838|2259	1609	['H1FX']	S31: Phospho	FALSE	['NA']	FALSE	0	HCD	No	N/A	N/A	N/A	N/A	2	35.44	1865	1503	3069	4578	3163	3917	1054	2760	1394	1287	2853
APSPPLSQVFQTR|S3: Phospho	28	gi|256818794|ref|NP_062817.2|; gi|256818796|ref|NP_001157973.1|; gi|256818798|ref|NP_001157974.1|	3	eukaryotic translation initiation factor 4E nuclear import factor 1 isoform a [Homo sapiens]; eukaryotic translation initiation factor 4E nuclear import factor 1 isoform b [Homo sapiens]	125208; 101537	125208	5	66	APSPPLSQVFQTR	S3: Phospho	S564: Phospho	604.65	3	1810.93	-0.001721	54.21	1	562	574	R	A	0	2012-08-10-Look-iTRAQ-pST-17p5-70.4444.4444.3.dta - 604.64980|1958|2021|2513|2499|3127|3521|2328|2390	1243	['EIF4ENIF1']	S564: Phospho	FALSE	['NA']	FALSE	0	HCD	Yes	Yes	Yes	32.75	21.46	3	55.48	2954	3053	4630	3925	5151	5759	4569	3267	1958	2021	2513
GLPPSVER|S5: Phospho	5	gi|21361809|ref|NP_062556.2|; gi|242117971|ref|NP_001156008.1|	2	RNA binding motif protein, X-linked-like 1 [Homo sapiens]	46432	46432	23	138	GLPPSVER	S5: Phospho	S351: Phospho	619.822	2	1237.64	-0.007408	30.88	1	347	354	R	G	0	2012-08-10-Look-iTRAQ-pST-9-230.4149.4149.2.dta - 619.82250|4825|5301|8266|6422|7020|6198|2537|4729	873	['RBMXL1']	S351: Phospho				0	HCD	No	N/A	N/A	N/A	N/A	6	39.43	20971	24258	35471	31848	28552	29613	12578	32673	4825	5301	8266
AISSDMFFGR|S3: Phospho	100	gi|31543983|ref|NP_115765.2|	1	ADP-ribosylation factor GTPase activating protein 2 [Homo sapiens]	68283	68283	1	32	AISSDMFFGR	S3: Phospho	S432: Phospho	757.855	2	1513.69	0.002063	32.18	1	430	439	K	E	0	2012-08-10-Look-iTRAQ-pST-15-230.4692.4692.2.dta - 757.85660|5652|1658|2337|9501|4126|13961|11068|3304	665	['ARFGAP2']	S432: Phospho	FALSE	['NA']	FALSE	0	HCD	No	N/A	N/A	N/A	N/A	1	32.18	5652	1658	2337	9501	4126	13961	11068	3304	5652	1658	2337
SESPPPLSDPK|S3: Phospho	135	gi|11067749|ref|NP_031397.1|	1	bromodomain containing protein 3 [Homo sapiens]	106547	106547	3	18	SESPPPLSDPK	S3: Phospho	S263: Phospho	614.652	3	1840.94	-0.008376	18.33	1	261	271	R	Q	0	2012-08-10-Look-iTRAQ-pST-9-700.2908.2908.3.dta - 614.65250|206|487|670|434|206|789|328|206	1152	['BRD3']	S263: Phospho	FALSE	['NA']	FALSE	0.0052356	CID	Yes	Yes	Yes	15.43	2.9	2	18.33	206	487	670	434	206	789	328	206	206	487	670
TPTEVWR|T3: Phospho	110	gi|50312666|ref|NP_037528.3|	1	ubiquitin specific peptidase 25 [Homo sapiens]	141991	141991	2	31	TPTEVWR	T3: Phospho	T149: Phospho	636.817	2	1271.62	-0.002728	31.06	1	147	153	R	D	0	2012-08-10-Look-iTRAQ-pST-11-230.4465.4465.2.dta - 636.81690|2301|3050|2151|2941|4087|4354|5777|3732	814	['USP25']	T149: Phospho	FALSE	['NA']	FALSE	0.00555556	HCD	No	N/A	N/A	N/A	N/A	1	31.06	2301	3050	2151	2941	4087	4354	5777	3732	2301	3050	2151
RYPNVFGIGDCTNLPTSK|S17: Phospho	3	gi|10864011|ref|NP_067022.1|	1	sulfide dehydrogenase like precursor [Homo sapiens]	60861	60861	2	78	RYPNVFGIGDCTNLPTSK	S17: Phospho	S343: Phospho	682.599	4	2726.37	-0.005806	51.31	1	327	344	R	T	1	2012-08-10-Look-iTRAQ-pST-20-230.3204.3204.4.dta - 682.59990|1941|437|527|1209|717|725|1802|542	896	['SQRDL']	S343: Phospho	FALSE	['NA']	FALSE	0	HCD	No	N/A	N/A	N/A	N/A	1	51.31	1941	437	527	1209	717	725	1802	542	1941	437	527
TAPLPPASQTTPLQMALNGKPAPPPQSQSPEVEQLGR|T11: Phospho; M15: Oxidation	79	gi|21264365|ref|NP_057404.2|; gi|56549645|ref|NP_624358.2|	2	nucleoporin 98kD isoform 1 [Homo sapiens]; nucleoporin 98kD isoform 4 [Homo sapiens]	222998; 214327	222998	1	14	TAPLPPASQTTPLQMALNGKPAPPPQSQSPEVEQLGR	T11: Phospho; M15: Oxidation	T899: Phospho; M903: Oxidation	908.473	5	4537.35	-0.023643	13.62	1	889	925	K	V	0	2012-08-10-Look-iTRAQ-pST-20-230.3208.3208.5.dta - 908.47600|208|208|392|208|372|208|208|208	1160	['NUP98']	T899: Phospho	FALSE	['NA']	FALSE	0	HCD	No	N/A	N/A	N/A	N/A	1	13.62	208	208	392	208	372	208	208	208	208	208	392
APEPPTQVGTLEAR|T10: Phospho	94	gi|148233642|ref|NP_787096.2|	1	hypothetical protein LOC283897 [Homo sapiens]	25067	25067	1	35	APEPPTQVGTLEAR	T10: Phospho	T116: Phospho	617.315	3	1848.93	-0.006863	34.85	1	107	120	R	A	0	2012-08-10-Look-iTRAQ-pST-11-230.3890.3890.3.dta - 617.31510|731|590|1079|473|909|1443|657|1931	2046	['C16orf54']	T116: Phospho	FALSE	['NA']	FALSE	0	HCD	Yes	Yes	Yes	29.31	5.54	1	34.85	731	590	1079	473	909	1443	657	1931	731	590	1079
SLQSLLGPSSK|S4: Phospho	67	gi|168229161|ref|NP_078811.3|	1	coronin 7 [Homo sapiens]	110752	110752	1	37	SLQSLLGPSSK	S4: Phospho	S465: Phospho	602.339	3	1804	0.000225	36.9	1	462	472	R	F	0	2012-08-10-Look-iTRAQ-pST-20-30.3742.3742.3.dta - 602.33970|1045|1612|714|2218|1247|2507|2669|1573	1142	['CORO7']	S465: Phospho	FALSE	['NA']	FALSE	0	HCD	No	N/A	N/A	N/A	N/A	3	46.9	1556	2691	1137	3857	2283	4357	4045	2784	1045	1612	714
TSLFANR|T1: Phospho	153	gi|7661962|ref|NP_055585.1|; gi|170650694|ref|NP_001116244.1|	2	centaurin, gamma 1 isoform PIKE-S [Homo sapiens]; centaurin, gamma 1 isoform PIKE-L [Homo sapiens]	102174; 143565	102174	3	25	TSLFANR	T1: Phospho	T311: Phospho	596.803	2	1191.6	-0.003318	25.28	1	311	317	R	R	0	2012-08-10-Look-iTRAQ-pST-15-70.3737.3737.2.dta - 596.80320|4740|4556|7564|4920|998|11095|11995|940	616	['AGAP2']	T311: Phospho	FALSE	['NA']	FALSE	0	HCD	No	N/A	N/A	N/A	N/A	1	25.28	4740	4556	7564	4920	998	11095	11995	940	4740	4556	7564
VDSLVSLSEEDLESDQR|S3: Phospho	27	gi|21493029|ref|NP_009131.2|; gi|31563330|ref|NP_006729.4|	2	A-kinase anchor protein 13 isoform 2 [Homo sapiens]; A-kinase anchor protein 13 isoform 1 [Homo sapiens]	368789; 369141	368789	1	74	VDSLVSLSEEDLESDQR	S3: Phospho	S1642: Phospho	769.028	3	2304.07	-0.006265	73.74	1	1640	1656	R	E	0	2012-08-10-Look-iTRAQ-pST-0-700.7189.7189.3.dta - 769.02800|210|210|210|210|210|356|375|210	2874	['AKAP13']	S1642: Phospho				0	HCD	No	N/A	N/A	N/A	N/A	1	73.74	210	210	210	210	210	356	375	210	210	210	210
RQSAGPWPRPK|S3: Phospho	116	gi|130502162|ref|NP_075055.1|	1	RAS protein activator like 3 [Homo sapiens]	121867	121867	3	31	RQSAGPWPRPK	S3: Phospho	S831: Phospho	492.773	4	1967.07	-0.008588	13.88	1	829	839	R	G	1	2012-08-10-Look-iTRAQ-pST-15-70.2467.2467.4.dta - 492.77360|395|967|1084|468|363|429|211|689	1814	['RASAL3']	S831: Phospho	FALSE	['NA']	FALSE	0.00688073	HCD	No	N/A	N/A	N/A	N/A	1	13.88	395	967	1084	468	363	429	211	689	395	967	1084
VQISPDSGGLPER|S4: Phospho	30	gi|154355000|ref|NP_003676.2|	1	KH-type splicing regulatory protein [Homo sapiens]	83090	83090	3	57	VQISPDSGGLPER	S4: Phospho	S181: Phospho	869.935	2	1737.86	-0.004991	26.32	1	178	190	K	S	0	2012-08-10-Look-iTRAQ-pST-11-230.4173.4173.2.dta - 869.93570|1067|3225|3424|2733|2802|2456|2524|1258	1870	['KHSRP']	S181: Phospho	FALSE	['NA']	FALSE	0.00434783	HCD	Yes	Yes	Yes	25.54	0.78	3	57.08	2403	5741	6559	4269	4835	4615	4497	2595	1067	3225	3424
SPTDDKVK|S1: Phospho	190	gi|89276756|ref|NP_003904.3|	1	serine/threonine-protein kinase PRP4K [Homo sapiens]	156500	156500	1	16	SPTDDKVK	S1: Phospho	S257: Phospho	471.264	4	1881.04	-0.009938	15.56	1	257	264	R	I	1	2012-08-10-Look-iTRAQ-pST-9-700.2168.2168.4.dta - 471.26440|562|630|3358|1475|2775|1857|954|508	1211	['PRPF4B']	S257: Phospho	TRUE	['sp|Q13523|PRP4B_HUMAN Serine/threonine-protein kinase PRP4 homolog OS=Homo sapiens GN=PRPF4B PE=1 SV=3']	TRUE	0	HCD	No	N/A	N/A	N/A	N/A	1	15.56	562	630	3358	1475	2775	1857	954	508	562	630	3358
AVPDAVESRYSR|S8: Phospho	172	gi|110347451|ref|NP_000433.3|	1	platelet/endothelial cell adhesion molecule precursor [Homo sapiens]	101649	101649	1	20	AVPDAVESRYSR	S8: Phospho	S726: Phospho	578.621	3	1732.85	-0.003112	21.1	1	719	730	K	T	1	2012-08-10-Look-iTRAQ-pST-9-230.3748.3748.3.dta - 578.62150|638|2541|991|2802|910|1993|877|1468	1974	['PECAM1']	S726: Phospho				0.0031348	HCD	No	N/A	N/A	N/A	N/A	1	21.1	638	2541	991	2802	910	1993	877	1468	638	2541	991
TASLTSAASVDGNR|S3: Phospho	44	gi|10280620|ref|NP_057334.1|; gi|42544211|ref|NP_963293.1|; gi|42544213|ref|NP_963294.1|; gi|42544216|ref|NP_963831.1|; gi|42544218|ref|NP_963832.1|; gi|42544220|ref|NP_963833.1|; gi|42544222|ref|NP_963834.1|; gi|42544224|ref|NP_963835.1|	8	N-myc downstream-regulated gene 2 isoform b [Homo sapiens]; N-myc downstream-regulated gene 2 isoform a [Homo sapiens]; N-myc downstream-regulated gene 2 isoform a [Homo sapiens]; N-myc downstream-regulated gene 2 isoform a [Homo sapiens]; N-myc downstream-regulated gene 2 isoform a [Homo sapiens]	43561; 45069; 45069; 45069; 45069	43561	1	47	TASLTSAASVDGNR	S3: Phospho	S318: Phospho	578.616	3	1732.83	-0.003589	46.55	1	316	329	R	S	0	2012-08-10-Look-iTRAQ-pST-11-230.3371.3371.3.dta - 578.61650|859|1487|1499|1525|1103|1384|628|1438	1850	['NDRG2']	S318: Phospho	FALSE	['NA']	FALSE	0	HCD	Yes	Yes	T5: Phospho	38.95	7.6	1	46.55	859	1487	1499	1525	1103	1384	628	1438	859	1487	1499
QRSPIALPVK|S3: Phospho	182	gi|154146193|ref|NP_116259.2|; gi|154146223|ref|NP_056306.1|	2	splicing factor, arginine/serine-rich 130 [Homo sapiens]	115945	115945	1	21	QRSPIALPVK	S3: Phospho	S211: Phospho	599.691	3	1796.05	-0.00279	20.61	1	209	218	R	Q	1	2012-08-10-Look-iTRAQ-pST-15-70.3269.3269.3.dta - 599.69030|1680|1478|730|2293|1091|899|997|1764	1610	['SFRS18']	S211: Phospho	FALSE	['NA']	FALSE	0.00310559	HCD	Yes	Yes	Yes	19.9	0.71	1	20.61	1680	1478	730	2293	1091	899	997	1764	1680	1478	730
KAYSFCGTVEYMAPEVVNR|S4: Phospho	2	gi|4759050|ref|NP_004577.1|; gi|20149547|ref|NP_002944.2|; gi|55743134|ref|NP_001006666.1|; gi|7657526|ref|NP_055311.1|	4	ribosomal protein S6 kinase, 90kDa, polypeptide 3 [Homo sapiens]; ribosomal protein S6 kinase, 90kDa, polypeptide 1 isoform a [Homo sapiens]; ribosomal protein S6 kinase, 90kDa, polypeptide 1 isoform b [Homo sapiens]; ribosomal protein S6 kinase polypeptide 6 [Homo sapiens]	100452; 101018; 102227; 101424	100452	2	104	KAYSFCGTVEYMAPEVVNR	S4: Phospho	S227: Phospho	728.108	4	2908.41	-0.007296	37.33	1	224	242	K	R	1	2012-08-10-Look-iTRAQ-pST-17p5-230.3827.3827.4.dta - 728.10880|214|393|214|436|214|214|214|214	1222	['RPS6KA3', 'RPS6KA1', 'RPS6KA6']	S227: Phospho	TRUE	['sp|Q9UK32|KS6A6_HUMAN Ribosomal protein S6 kinase alpha-6 OS=Homo sapiens GN=RPS6KA6 PE=1 SV=1', 'sp|P51812|KS6A3_HUMAN Ribosomal protein S6 kinase alpha-3 OS=Homo sapiens GN=RPS6KA3 PE=1 SV=1', 'sp|Q15418|KS6A1_HUMAN Ribosomal protein S6 kinase alpha-1 OS=Homo sapiens GN=RPS6KA1 PE=1 SV=2']	FALSE	0	HCD	Yes	Yes	T8: Phospho	19.33	18	1	37.33	214	393	214	436	214	214	214	214	214	393	214
SSSEDAESLAPR|S3: Phospho	66	gi|109809739|ref|NP_056269.1|; gi|109809741|ref|NP_057732.2|	2	La ribonucleoprotein domain family, member 7 [Homo sapiens]	94825	94825	6	56	SSSEDAESLAPR	S3: Phospho	S300: Phospho	816.872	2	1631.73	-0.004171	20.78	1	298	309	R	S	0	2012-08-10-Look-iTRAQ-pST-0-700.3093.3093.2.dta - 816.87250|1614|1217|4972|1285|1569|1628|1149|857	1586	['LARP7']	S300: Phospho				0.0020284	HCD	No	N/A	N/A	N/A	N/A	3	40.24	2749	2934	7552	3414	3297	4566	2628	1956	1614	1217	4972
LCAGIMITASHNPK|S10: Phospho	29	gi|63055049|ref|NP_060760.2|	1	phosphoglucomutase 2 [Homo sapiens]	83660	83660	5	58	LCAGIMITASHNPK	S10: Phospho	S165: Phospho	551.041	4	2200.14	-0.001064	47.57	1	156	169	K	Q	0	2012-08-10-Look-iTRAQ-pST-17p5-230.3046.3046.4.dta - 551.04170|1019|1324|2298|1009|1158|1732|1488|826	968	['PGM2']	S165: Phospho	FALSE	['NA']	FALSE	0	HCD	Yes	Yes	Yes	29.96	17.61	1	47.57	1019	1324	2298	1009	1158	1732	1488	826	1019	1324	2298
SRSDIDVNAAAGAK|S3: Phospho	46	gi|57863301|ref|NP_055912.1|	1	CLIP-associating protein 2 [Homo sapiens]	192638	192638	1	35	SRSDIDVNAAAGAK	S3: Phospho	S603: Phospho	516.522	4	2062.07	-0.006389	34.98	1	601	614	R	A	1	2012-08-10-Look-iTRAQ-pST-11-230.2982.2982.4.dta - 516.52280|205|205|522|205|205|484|205|205	2408	['CLASP2']	S603: Phospho	FALSE	['NA']	FALSE	0	CID	No	N/A	N/A	N/A	N/A	1	34.98	205	205	522	205	205	484	205	205	205	205	522
AAPPPPPPPPPLESSPR|S15: Phospho	5	gi|82659109|ref|NP_065816.2|	1	retinoblastoma-associated factor 600 [Homo sapiens]	668462	668462	2	80	AAPPPPPPPPPLESSPR	S15: Phospho	S620: Phospho	696.697	3	2087.08	-0.00665	51.01	1	606	622	K	V	0	2012-08-10-Look-iTRAQ-pST-13-230.3337.3337.3.dta - 696.69780|213|213|521|213|530|550|213|626	1845	['UBR4']	S620: Phospho	FALSE	['NA']	FALSE	0	CID	Yes	Yes	Yes	30.2	20.81	1	51.01	213	213	521	213	530	550	213	626	213	213	521
EVLYDSEGLSGEER|S6: Phospho; S10: Phospho	2	gi|226509740|ref|NP_067051.2|	1	SR-related CTD-associated factor 1 [Homo sapiens]	165367	165367	9	70	EVLYDSEGLSGEER	S6: Phospho; S10: Phospho	S734: Phospho; S738: Phospho	682.956	3	2045.85	-0.006749	45.93	1	729	742	R	G	0	2012-08-10-Look-iTRAQ-pST-22p5-700.3187.3187.3.dta - 682.95710|210|1474|1849|1945|1793|2196|758|1252	690	['SCAF1']	S734: Phospho; S738: Phospho	FALSE	['NA']	FALSE	0	HCD	No	N/A	N/A	N/A	N/A	10	70.53	4601	5777	10377	9529	7798	10588	4176	5544	210	1474	1849
RHSDENDGGQPHKR|S3: Phospho	107	gi|4505343|ref|NP_002477.1|	1	nuclear cap binding protein subunit 1, 80kDa [Homo sapiens]	107770	107770	1	31	RHSDENDGGQPHKR	S3: Phospho	S7: Phospho	465.032	5	2320.13	-0.006191	31.96	1	5	18	R	R	2	2012-08-10-Look-iTRAQ-pST-9-230.1088.1088.5.dta - 465.03170|212|212|1716|212|861|1176|482|355	2754	['NCBP1']	S7: Phospho				0	HCD	No	N/A	N/A	N/A	N/A	1	31.96	212	212	1716	212	861	1176	482	355	212	212	1716
SAAEMYGSSFDLDYDFQR|S1: Phospho; M5: Oxidation	25	gi|117190174|ref|NP_004491.2|; gi|117190254|ref|NP_001070911.1|	2	heterogeneous nuclear ribonucleoprotein C isoform b [Homo sapiens]	41501	41501	2	25	SAAEMYGSSFDLDYDFQR	S1: Phospho; M5: Oxidation	S100: Phospho; M104: Oxidation	834.689	3	2501.04	0.004142	21.75	1	100	117	R	D	0	2012-08-10-Look-iTRAQ-pST-22p5-230.3515.3515.3.dta - 834.69040|213|485|417|1044|250|617|213|213	835	['HNRNPC']	S100: Phospho	FALSE	['NA']	FALSE	0	CID	No	N/A	N/A	N/A	N/A	1	21.75	213	485	417	1044	250	617	213	213	213	485	417
RLTWPR|T3: Phospho	139	gi|82546843|ref|NP_004318.3|; gi|82546845|ref|NP_067585.2|	2	breakpoint cluster region isoform 1 [Homo sapiens]; breakpoint cluster region isoform 2 [Homo sapiens]	168701; 161979	168701	2	27	RLTWPR	T3: Phospho	T310: Phospho	404.888	3	1211.65	-0.005108	23.85	1	308	313	K	R	1	2012-08-10-Look-iTRAQ-pST-17p5-70.3138.3138.3.dta - 404.88850|1131|1462|1078|2908|1841|3553|1952|1423	567	['BCR']	T310: Phospho	TRUE	['sp|P11274|BCR_HUMAN Breakpoint cluster region protein OS=Homo sapiens GN=BCR PE=1 SV=2']	TRUE	0	HCD	No	N/A	N/A	N/A	N/A	2	28.05	1776	2691	1846	5269	3219	5800	3414	2952	1131	1462	1078
ARTPEAVESPQEASGVR|T3: Phospho	39	gi|144953903|ref|NP_060659.3|	1	developmental pluripotency associated 4 [Homo sapiens]	43901	43901	1	52	ARTPEAVESPQEASGVR	T3: Phospho	T215: Phospho	723.36	3	2167.06	2.9e-05	52.1	1	213	229	R	W	1	2012-08-10-Look-iTRAQ-pST-9-230.3147.3147.3.dta - 723.36010|369|207|207|907|1139|207|207|651	2704	['DPPA4']	T215: Phospho				0	HCD	Yes	Yes	Yes	39.4	12.7	1	52.1	369	207	207	907	1139	207	207	651	369	207	207
SPTGPSNSFLANMGGTVAHK|T3: Phospho; M13: Oxidation	6	gi|14249678|ref|NP_116294.1|; gi|224549005|ref|NP_001139019.1|	2	RNA binding motif protein 17 [Homo sapiens]	56418	56418	8	60	SPTGPSNSFLANMGGTVAHK	T3: Phospho; M13: Oxidation	T224: Phospho; M234: Oxidation	670.085	4	2676.32	-0.008693	26.3	1	222	241	R	I	0	2012-08-10-Look-iTRAQ-pST-20-230.2832.2832.4.dta - 670.08670|371|431|1212|215|405|891|676|458	872	['RBM17']	T224: Phospho	FALSE	['NA']	FALSE	0	CID	No	N/A	N/A	N/A	N/A	15	65.97	3221	3995	7088	4544	6229	6497	4193	3818	371	431	1212
KPSGSPDLWK|S5: Phospho	93	gi|41281612|ref|NP_115812.1|; gi|255918139|ref|NP_001157616.1|; gi|255918141|ref|NP_001157617.1|	3	zinc finger protein 828 [Homo sapiens]	115261	115261	2	35	KPSGSPDLWK	S5: Phospho	S445: Phospho	527.545	4	2106.16	-0.014885	13	1	441	450	R	L	0	2012-08-10-Look-iTRAQ-pST-15-230.2854.2854.4.dta - 527.54440|680|312|1987|722|1256|1156|552|466	1521	['ZNF828']	S445: Phospho	FALSE	['NA']	FALSE	0.0030581	HCD	No	N/A	N/A	N/A	N/A	1	13	680	312	1987	722	1256	1156	552	466	680	312	1987
HLSEGTNSYATR|S3: Phospho	106	gi|28872812|ref|NP_056173.1|	1	MORC family CW-type zinc finger 3 [Homo sapiens]	130754	130754	1	31	HLSEGTNSYATR	S3: Phospho	S514: Phospho	573.936	3	1718.79	-0.00638	31.57	1	512	523	R	L	0	2012-08-10-Look-iTRAQ-pST-9-230.2849.2849.3.dta - 573.93640|532|389|1010|744|1108|1267|648|622	1928	['MORC3']	S514: Phospho				0	HCD	No	N/A	N/A	N/A	N/A	1	31.57	532	389	1010	744	1108	1267	648	622	532	389	1010
DKEVSDDEAEEK|S5: Phospho	15	gi|153792590|ref|NP_001017963.2|; gi|154146191|ref|NP_005339.3|	2	heat shock 90kDa protein 1, alpha isoform 1 [Homo sapiens]; heat shock 90kDa protein 1, alpha isoform 2 [Homo sapiens]	124223; 109646	124223	1	44	DKEVSDDEAEEK	S5: Phospho	S353: Phospho	796.06	3	2385.17	-0.013699	43.97	1	349	360	R	E	1	2012-08-10-Look-iTRAQ-pST-20-700.2050.2050.3.dta - 796.06090|659|1775|1532|1994|1983|1816|214|5578	596	['HSP90AA1']	S353: Phospho	FALSE	['NA']	FALSE	0	HCD	Yes	Yes	Yes	23.54	20.43	4	51.14	1094	2735	2218	2429	2931	2425	649	8063	659	1775	1532
GEPNVSYICSR|Y7: Phospho	44	gi|21361340|ref|NP_002084.2|; gi|225903437|ref|NP_001139628.1|; gi|49574532|ref|NP_063937.2|	3	glycogen synthase kinase 3 beta isoform 1 [Homo sapiens]; glycogen synthase kinase 3 beta isoform 2 [Homo sapiens]; glycogen synthase kinase 3 alpha [Homo sapiens]	55818; 54529; 58402	55818	5	36	GEPNVSYICSR	Y7: Phospho	Y216: Phospho	833.383	2	1664.75	-0.003133	23.85	1	210	220	R	Y	0	2012-08-10-Look-iTRAQ-pST-9-230.4010.4010.2.dta - 833.38280|1789|2759|3526|3605|3201|3773|3086|2692	1844	['GSK3B', 'GSK3A']	Y216: Phospho				0.00763359	CID	Yes	Yes	Yes	17.99	5.86	7	46.49	6222	12166	11047	11780	10666	14084	9472	9063	1789	2759	3526
HVTLPSSPR|S7: Phospho	22	gi|82659109|ref|NP_065816.2|	1	retinoblastoma-associated factor 600 [Homo sapiens]	668462	668462	3	70	HVTLPSSPR	S7: Phospho	S2719: Phospho	459.908	3	1376.71	-0.008364	31.89	1	2713	2721	R	S	0	2012-08-10-Look-iTRAQ-pST-13-230.2274.2274.3.dta - 459.90900|1299|1035|1316|1022|2070|2390|2400|1572	795	['UBR4']	S2719: Phospho	FALSE	['NA']	FALSE	0	HCD	Yes	Yes	Yes	29.22	2.67	3	38.99	1726	1702	1936	1656	2834	3260	4042	2195	1299	1035	1316
KPEEESPR|S6: Phospho	244	gi|27262628|ref|NP_002473.2|; gi|27262630|ref|NP_689511.2|; gi|27262634|ref|NP_751896.1|	3	nuclear autoantigenic sperm protein isoform 2 [Homo sapiens]; nuclear autoantigenic sperm protein isoform 3 [Homo sapiens]; nuclear autoantigenic sperm protein isoform 1 [Homo sapiens]	104636; 59041; 105362	104636	1	16	KPEEESPR	S6: Phospho	S726: Phospho	553.954	3	1658.85	-0.007612	16.49	1	721	728	R	K	0	2012-08-10-Look-iTRAQ-pST-0-700.2006.2006.3.dta - 553.95440|862|972|3095|2276|1727|6493|1750|935	1638	['NASP', 'unresolved: gi|27262634|ref|NP_751896.1|']	S726: Phospho				0.00170068	HCD	No	N/A	N/A	N/A	N/A	1	16.49	862	972	3095	2276	1727	6493	1750	935	862	972	3095
TPVSPVKFSPGDFWGR|T1: Phospho	84	gi|4506737|ref|NP_003152.1|	1	ribosomal protein S6 kinase, 70kDa, polypeptide 1 [Homo sapiens]	70395	70395	1	12	TPVSPVKFSPGDFWGR	T1: Phospho	T444: Phospho	617.075	4	2464.28	-0.007565	11.7	1	444	459	R	G	1	2012-08-10-Look-iTRAQ-pST-20-230.3681.3681.4.dta - 617.07580|215|425|457|215|215|215|215|215	791	['RPS6KB1']	T444: Phospho	TRUE	['sp|P23443|KS6B1_HUMAN Ribosomal protein S6 kinase beta-1 OS=Homo sapiens GN=RPS6KB1 PE=1 SV=2']	TRUE	0	HCD	No	N/A	N/A	N/A	N/A	1	11.7	215	425	457	215	215	215	215	215	215	425	457
LRDSLGR|S4: Phospho	160	gi|21361497|ref|NP_054768.2|	1	acyl-Coenzyme A dehydrogenase family, member 9 precursor [Homo sapiens]	81512	81512	1	22	LRDSLGR	S4: Phospho	S474: Phospho	400.884	3	1199.63	-0.002359	22.36	1	471	477	R	T	1	2012-08-10-Look-iTRAQ-pST-9-230.2784.2784.3.dta - 400.88430|1484|805|375|977|404|488|559|1530	785	['ACAD9']	S474: Phospho				0	HCD	No	N/A	N/A	N/A	N/A	1	22.36	1484	805	375	977	404	488	559	1530	1484	805	375
LQTTDNLLPMSPEEFDEVSR|M10: Oxidation; S11: Phospho	10	gi|6274552|ref|NP_009330.1|	1	signal transducer and activator of transcription 1 isoform alpha [Homo sapiens]	104885	104885	1	53	LQTTDNLLPMSPEEFDEVSR	M10: Oxidation; S11: Phospho	M726: Oxidation; S727: Phospho	907.759	3	2720.26	0.000527	53.32	1	717	736	R	I	0	2012-08-10-Look-iTRAQ-pST-15-700.4000.4000.3.dta - 907.75960|211|568|795|481|705|481|211|553	842	['STAT1']	S727: Phospho	FALSE	['NA']	FALSE	0	HCD	No	N/A	N/A	N/A	N/A	1	53.32	211	568	795	481	705	481	211	553	211	568	795
KHSVNEK|S3: Phospho	224	gi|38505209|ref|NP_071357.2|; gi|215983094|ref|NP_001135991.1|; gi|215983096|ref|NP_001135992.1|; gi|215983098|ref|NP_001135993.1|; gi|38505211|ref|NP_942144.1|	5	hypothetical protein LOC63901 [Homo sapiens]	88955	88955	1	10	KHSVNEK	S3: Phospho	S12: Phospho	459.261	4	1833.03	-0.01202	10.03	1	10	16	R	C	1	2012-08-10-Look-iTRAQ-pST-9-700.1730.1730.4.dta - 459.26140|1301|223|3878|484|1381|3220|1461|716	1140	['FAM111A']	S12: Phospho	FALSE	['NA']	FALSE	0.00288184	HCD	No	N/A	N/A	N/A	N/A	1	10.03	1301	223	3878	484	1381	3220	1461	716	1301	223	3878
VASFR|S3: Phospho	205	gi|4505621|ref|NP_002558.1|; gi|41350316|ref|NP_958435.1|; gi|41350318|ref|NP_958438.1|; gi|44680154|ref|NP_057240.3|; rev_gi|15011902|ref|NP_116561.1|; rev_gi|244790013|ref|NP_001156423.1|; rev_gi|244790020|ref|NP_001156425.1|	7	prostatic binding protein [Homo sapiens]; myotubularin-related protein 2 isoform 2 [Homo sapiens]; myotubularin-related protein 2 isoform 2 [Homo sapiens]; myotubularin-related protein 2 isoform 1 [Homo sapiens]; synaptotagmin-like 2 isoform a [Homo sapiens]; synaptotagmin-like 2 isoform g [Homo sapiens]; synaptotagmin-like 2 isoform i [Homo sapiens]	26025; 76165; 76165; 84552; 129595; 131920; 132048	26025	1	15	VASFR	S3: Phospho	S153: Phospho	482.251	2	962.489	-0.002011	15.11	1	151	155	K	K	0	2012-08-10-Look-iTRAQ-pST-9-230.3566.3566.2.dta - 482.25110|2830|4476|5361|4222|5216|6059|4893|3517	344	['PEBP1', 'MTMR2', 'NA']	S153: Phospho				0.00674157	HCD	No	N/A	N/A	N/A	N/A	1	15.11	2830	4476	5361	4222	5216	6059	4893	3517	2830	4476	5361
EDAEAPGIRDHESL|S13: Phospho	42	gi|4758516|ref|NP_004485.1|; gi|186928819|ref|NP_001119522.1|; gi|186928821|ref|NP_001119523.1|	3	hepatoma-derived growth factor isoform a [Homo sapiens]; hepatoma-derived growth factor isoform b [Homo sapiens]; hepatoma-derived growth factor isoform c [Homo sapiens]	35404; 36517; 32937	35404	3	65	EDAEAPGIRDHESL	S13: Phospho	S239: Phospho	641.631	3	1921.87	-0.000141	30.26	1	227	240	K	-	1	2012-08-10-Look-iTRAQ-pST-0-700.3746.3746.3.dta - 641.63140|211|211|211|211|581|386|211|1358	2378	['HDGF']	S239: Phospho				0	HCD	No	N/A	N/A	N/A	N/A	1	30.26	211	211	211	211	581	386	211	1358	211	211	211
APSPR|S3: Phospho	193	gi|7657301|ref|NP_055130.1|; gi|110347463|ref|NP_006725.3|; gi|122937496|ref|NP_001073998.1|; gi|131887988|ref|NP_001076436.1|; gi|149589021|ref|NP_208382.1|; gi|157785645|ref|NP_005867.3|; gi|163644316|ref|NP_056025.2|; gi|169192119|ref|XP_001716079.1|; gi|169194607|ref|XP_001716818.1|; gi|169201944|ref|XP_001718753.1|; gi|169211031|ref|XP_001726352.1|; gi|169211844|ref|XP_001128144.2|; gi|19444…	21	kelch domain containing 2 [Homo sapiens]; human immunodeficiency virus type I enhancer binding protein 2 [Homo sapiens]; WAS/WASL interacting protein family, member 3 [Homo sapiens]; family with sequence similarity 19 (chemokine (C-C motif)-like), member A5 isoform 1 [Homo sapiens]; doublecortin-like kinase 3 [Homo sapiens]; SPEG complex locus [Homo sapiens]; hypothetical protein LOC23255 [Homo s…	51868; 317956; 56600; 16325; 92952; 386981; 207818; 48698; 48698; 48698; 28938; 21243; 20018; 20018; 53113; 28938; 162354; 7434; 118888; 52313; 109369	51868	1	14	APSPR	S3: Phospho	S216: Phospho	456.236	2	910.458	0.0003	14.49	1	214	218	K	A	0	2012-08-10-Look-iTRAQ-pST-9-700.1470.1470.2.dta - 456.23690|1760|2058|2750|2838|2187|3506|1724|2028	135	['KLHDC2', 'HIVEP2', 'WIPF3', 'FAM19A5', 'DCLK3', 'SPEG', 'KIAA0802', 'unresolved: gi|169192119|ref|XP_001716079.1|', 'unresolved: gi|169194607|ref|XP_001716818.1|', 'unresolved: gi|169201944|ref|XP_001718753.1|', 'unresolved: gi|169211031|ref|XP_001726352.1|', 'unresolved: gi|169211844|ref|XP_001128144.2|', 'LY6H', 'HCRTR1', 'unresolved: gi|239756845|ref|XP_002345081.1|', 'ANKS1B', 'NA']	S216: Phospho	FALSE	['NA']	NA	0	HCD	No	N/A	N/A	N/A	N/A	1	14.49	1760	2058	2750	2838	2187	3506	1724	2028	1760	2058	2750
AAGGAPSPPPPVRR|S7: Phospho	39	gi|167614488|ref|NP_056342.3|	1	TBC1 domain family, member 10B [Homo sapiens]	100739	100739	3	49	AAGGAPSPPPPVRR	S7: Phospho	S678: Phospho	571.977	3	1712.9	0.007297	14.83	1	672	685	R	A	1	2012-08-10-Look-iTRAQ-pST-11-230.2230.2230.3.dta - 571.97780|727|1622|1690|1417|1696|2795|999|2410	1817	['TBC1D10B']	S678: Phospho	FALSE	['NA']	FALSE	0.00973236	HCD	No	N/A	N/A	N/A	N/A	1	14.83	727	1622	1690	1417	1696	2795	999	2410	727	1622	1690
ASDGGANIQLHAQQLLK|S2: Phospho	42	gi|38569491|ref|NP_079440.2|	1	serine/threonine-protein kinase QSK [Homo sapiens]	155139	155139	2	51	ASDGGANIQLHAQQLLK	S2: Phospho	S493: Phospho	613.833	4	2451.31	-0.008	39.5	1	492	508	R	R	0	2012-08-10-Look-iTRAQ-pST-17p5-230.3144.3144.4.dta - 613.83310|210|210|484|210|465|405|404|210	1077	['SIK3']	S493: Phospho	TRUE	['sp|Q9Y2K2|SIK3_HUMAN Serine/threonine-protein kinase SIK3 OS=Homo sapiens GN=SIK3 PE=1 SV=3']	TRUE	0	HCD	No	N/A	N/A	N/A	N/A	1	39.5	210	210	484	210	465	405	404	210	210	210	484
GGDVSPSPYSSSSWR|S5: Phospho	134	gi|145309300|ref|NP_112557.2|; gi|145309302|ref|NP_003709.3|	2	cell division cycle 2-like 5 isoform 2 [Homo sapiens]; cell division cycle 2-like 5 isoform 1 [Homo sapiens]	192238; 199939	192238	1	16	GGDVSPSPYSSSSWR	S5: Phospho	S383: Phospho	651.63	3	1951.86	0.006188	16.86	1	379	393	R	R	0	2012-08-10-Look-iTRAQ-pST-11-700.3088.3088.3.dta - 651.62960|207|207|1151|323|535|845|207|297	1057	['CDK13']	S383: Phospho	TRUE	['sp|Q14004|CDK13_HUMAN Cyclin-dependent kinase 13 OS=Homo sapiens GN=CDK13 PE=1 SV=2']	TRUE	0	HCD	No	N/A	N/A	N/A	N/A	1	16.86	207	207	1151	323	535	845	207	297	207	207	1151
SGSILTSP|S7: Phospho	119	gi|134288896|ref|NP_653265.3|	1	hypothetical protein LOC143684 [Homo sapiens]	53342	53342	2	29	SGSILTSP	S7: Phospho	S338: Phospho	573.292	2	1144.57	0.000209	28.64	1	332	339	K	-	0	2012-08-10-Look-iTRAQ-pST-9-230.4584.4584.2.dta - 573.29140|1422|2397|2268|1618|2707|2282|2404|3655	648	['FAM76B']	S338: Phospho				0	HCD	No	N/A	N/A	N/A	N/A	2	28.64	2874	4565	4402	2817	4597	4844	4607	4996	1422	2397	2268
DVTNFTVGGFAPMSPR|M13: Oxidation; S14: Phospho	24	gi|20149524|ref|NP_003160.2|; gi|161169023|ref|NP_001104490.1|; gi|195546900|ref|NP_001124296.1|; gi|195546902|ref|NP_001124297.1|	4	suppressor of Ty 5 homolog isoform a [Homo sapiens]; suppressor of Ty 5 homolog isoform b [Homo sapiens]	140489; 139988	140489	3	41	DVTNFTVGGFAPMSPR	M13: Oxidation; S14: Phospho	M665: Oxidation; S666: Phospho	699.332	3	2094.98	-0.000794	40.29	1	653	668	R	I	0	2012-08-10-Look-iTRAQ-pST-20-230.3262.3262.3.dta - 699.33340|1175|1219|1194|967|1568|1384|1052|1108	685	['SUPT5H']	S666: Phospho	FALSE	['NA']	FALSE	0	CID	Yes	Yes	Yes	29.86	10.43	22	52.98	6356	8800	8922	11331	10957	9320	7425	7397	1175	1219	1194
HVDSLSQRSPK|S9: Phospho	162	gi|116256489|ref|NP_006631.2|; gi|164698494|ref|NP_001106963.1|; gi|164698498|ref|NP_001106965.1|	3	septin 9 isoform c [Homo sapiens]; septin 9 isoform a [Homo sapiens]; septin 9 isoform b [Homo sapiens]	76688; 79031; 77703	76688	1	20	HVDSLSQRSPK	S9: Phospho	S67: Phospho	486.262	4	1941.03	-0.008938	19.67	1	59	69	R	A	1	2012-08-10-Look-iTRAQ-pST-15-230.1699.1699.4.dta - 486.26240|972|1507|4031|446|1182|2533|2171|756	1352	['SEPT9']	S67: Phospho	FALSE	['NA']	FALSE	0	HCD	No	N/A	N/A	N/A	N/A	2	19.67	1409	2040	4997	1038	1523	3076	2613	1126	972	1507	4031
AMVSPFHSPPSTPSSPGVR|S8: Phospho	84	gi|217035154|ref|NP_443094.3|	1	RCSD domain containing 1 [Homo sapiens]	55105	55105	1	42	AMVSPFHSPPSTPSSPGVR	S8: Phospho	S120: Phospho	774.711	3	2321.12	-0.005883	42.3	1	113	131	K	S	0	2012-08-10-Look-iTRAQ-pST-17p5-70.3365.3365.3.dta - 774.71160|431|1548|662|1473|541|2414|1567|682	1614	['RCSD1']	S120: Phospho	FALSE	['NA']	FALSE	0	HCD	No	N/A	N/A	N/A	N/A	1	42.3	431	1548	662	1473	541	2414	1567	682	431	1548	662
QFSALVPAFDPRPGR|S3: Phospho	55	gi|118498337|ref|NP_056197.2|	1	HECT domain containing 1 [Homo sapiens]	331468	331468	1	24	QFSALVPAFDPRPGR	S3: Phospho	S1772: Phospho	681.353	3	2041.05	-0.008131	24.1	1	1770	1784	R	T	0	2012-08-10-Look-iTRAQ-pST-22p5-30.3966.3966.3.dta - 681.35370|969|1163|1156|699|1665|2142|1865|2887	1052	['HECTD1']	S1772: Phospho	FALSE	['NA']	FALSE	0	HCD	Yes	Yes	Yes	19.91	4.19	1	24.1	969	1163	1156	699	1665	2142	1865	2887	969	1163	1156
KPNIFYSGPASPARPR|S11: Phospho	150	gi|24497618|ref|NP_054828.2|	1	ATPase family, AAA domain containing 2 [Homo sapiens]	189028	189028	1	24	KPNIFYSGPASPARPR	S11: Phospho	S327: Phospho	612.335	4	2445.31	-0.004765	24.99	1	317	332	R	Y	0	2012-08-10-Look-iTRAQ-pST-17p5-70.3010.3010.4.dta - 612.33470|1349|853|866|2031|483|865|210|1889	1663	['ATAD2']	S327: Phospho	FALSE	['NA']	FALSE	0	HCD	No	N/A	N/A	N/A	N/A	2	24.99	2817	1403	1458	3808	1018	1589	418	3760	1349	853	866
RPSLGELLLR|S3: Phospho	46	gi|149393138|ref|NP_001092264.1|; gi|149393140|ref|NP_115503.2|	2	hypothetical protein LOC84067 isoform 2 [Homo sapiens]; hypothetical protein LOC84067 isoform 1 [Homo sapiens]	113886; 115398	113886	1	55	RPSLGELLLR	S3: Phospho	S859: Phospho	513.296	3	1536.87	-0.003275	54.67	1	857	866	R	H	0	2012-08-10-Look-iTRAQ-pST-17p5-70.4627.4627.3.dta - 513.29600|2046|3816|1828|3391|1827|4466|1945|5818	922	['FAM160A2']	S859: Phospho	FALSE	['NA']	FALSE	0	HCD	No	N/A	N/A	N/A	N/A	1	54.67	2046	3816	1828	3391	1827	4466	1945	5818	2046	3816	1828
GPSPFSPVQLHQLR|S3: Phospho	39	gi|48255898|ref|NP_620614.2|; gi|48255900|ref|NP_003061.3|	2	SWI/SNF-related matrix-associated actin-dependent regulator of chromatin a2 isoform b [Homo sapiens]; SWI/SNF-related matrix-associated actin-dependent regulator of chromatin a2 isoform a [Homo sapiens]	217461; 219819	217461	1	57	GPSPFSPVQLHQLR	S3: Phospho	S172: Phospho	649.674	3	1946.01	-0.007962	56.76	1	170	183	R	A	0	2012-08-10-Look-iTRAQ-pST-17p5-70.3788.3788.3.dta - 649.67380|210|408|1194|396|768|1099|630|273	1420	['SMARCA2']	S172: Phospho	FALSE	['NA']	FALSE	0	HCD	No	N/A	N/A	N/A	N/A	1	56.76	210	408	1194	396	768	1099	630	273	210	408	1194
AKSPTPDGSER|S3: Phospho; T5: Phospho	241	gi|72534750|ref|NP_001026902.1|; gi|94536805|ref|NP_588611.2|	2	splicing factor YT521-B isoform 1 [Homo sapiens]; splicing factor YT521-B isoform 2 [Homo sapiens]	99840; 96617	99840	1	17	AKSPTPDGSER	S3: Phospho; T5: Phospho	S146: Phospho; T148: Phospho	478.98	4	1911.9	-0.002994	16.91	1	144	154	R	I	1	2012-08-10-Look-iTRAQ-pST-0-700.1750.1750.4.dta - 478.98070|609|209|848|1153|605|1326|209|615	2328	['YTHDC1']	S146: Phospho; T148: Phospho				0.0017331	HCD	No	N/A	N/A	N/A	N/A	1	16.91	609	209	848	1153	605	1326	209	615	609	209	848
SASPYPSHSLSSPQR|S1: Phospho; S3: Phospho; S12: Phospho	3	gi|116008442|ref|NP_055885.3|	1	zinc finger CCCH-type containing 13 [Homo sapiens]	222881	222881	10	158	SASPYPSHSLSSPQR	S1: Phospho; S3: Phospho; S12: Phospho	S370: Phospho; S372: Phospho; S381: Phospho	715.629	3	2143.87	-0.003567	15.75	1	370	384	R	K	0	2012-08-10-Look-iTRAQ-pST-0-700.3044.3044.3.dta - 715.62890|205|205|664|406|494|514|205|205	2758	['ZC3H13']	S370: Phospho; S372: Phospho; S381: Phospho				0.00323625	HCD	No	N/A	N/A	N/A	N/A	1	15.75	205	205	664	406	494	514	205	205	205	205	664
AVAGVMITASHNR|M6: Oxidation; S10: Phospho	28	gi|31377548|ref|NP_775853.2|	1	phosphoglucomutase 2-like 1 [Homo sapiens]	86880	86880	2	66	AVAGVMITASHNR	M6: Oxidation; S10: Phospho	M171: Oxidation; S175: Phospho	576.288	3	1725.85	-0.012927	51	1	166	178	K	K	0	2012-08-10-Look-iTRAQ-pST-15-70.2636.2636.3.dta - 576.28830|2248|2393|1611|2703|2450|4054|3249|3845	1512	['PGM2L1']	S175: Phospho	FALSE	['NA']	FALSE	0	HCD	No	N/A	N/A	N/A	N/A	1	51	2248	2393	1611	2703	2450	4054	3249	3845	2248	2393	1611
QLLDSDEEQEEDEGRNR|S5: Phospho	2	gi|222136585|ref|NP_003911.2|	1	timeless homolog [Homo sapiens]	160588	160588	1	80	QLLDSDEEQEEDEGRNR	S5: Phospho	S1173: Phospho	816.028	3	2445.06	0.001861	79.58	1	1169	1185	R	A	1	2012-08-10-Look-iTRAQ-pST-17p5-700.2396.2396.3.dta - 816.02860|1825|1151|209|1666|1125|209|1104|2048	616	['TIMELESS']	S1173: Phospho	FALSE	['NA']	FALSE	0	HCD	Yes	Yes	Yes	29.1	50.48	1	79.58	1825	1151	209	1666	1125	209	1104	2048	1825	1151	209
RISGASELGPFSDPR|S3: Phospho	95	gi|226442791|ref|NP_001015051.3|	1	runt-related transcription factor 2 isoform b [Homo sapiens]	57181	57181	1	38	RISGASELGPFSDPR	S3: Phospho	S340: Phospho	658.33	3	1971.97	-0.003471	37.51	1	338	352	R	Q	1	2012-08-10-Look-iTRAQ-pST-17p5-70.3523.3523.3.dta - 658.33000|773|1579|1630|1323|984|1683|546|1142	1433	['RUNX2']	S340: Phospho	FALSE	['NA']	FALSE	0	HCD	No	N/A	N/A	N/A	N/A	3	43.69	1183	2180	2040	2055	1547	2093	956	2072	773	1579	1630
TASPPPPPK|T1: Phospho	1	gi|42542379|ref|NP_005830.2|	1	serine/arginine repetitive matrix 1 [Homo sapiens]	133664	133664	52	381	TASPPPPPK	T1: Phospho	T614: Phospho	527.293	3	1578.86	-0.007173	19.48	1	614	622	R	R	0	2012-08-10-Look-iTRAQ-pST-9-230.2723.2723.3.dta - 527.29280|208|328|900|560|823|472|369|349	1642	['SRRM1']	T614: Phospho				0.00573066	HCD	No	N/A	N/A	N/A	N/A	2	23.52	417	537	1503	769	1451	1107	578	558	208	328	900
RPNEDSDEDEEKGAVVPPVHDIYR|S6: Phospho	133	gi|4557495|ref|NP_001317.1|	1	cleavage stimulation factor subunit 3 isoform 1 [Homo sapiens]	102794	102794	1	16	RPNEDSDEDEEKGAVVPPVHDIYR	S6: Phospho	S691: Phospho	691.739	5	3453.67	-0.00972	16.87	1	686	709	K	A	1	2012-08-10-Look-iTRAQ-pST-20-30.2658.2658.5.dta - 691.73940|376|207|207|405|207|207|207|207	1625	['CSTF3']	S691: Phospho	FALSE	['NA']	FALSE	0	HCD	No	N/A	N/A	N/A	N/A	3	23.94	376	207	207	405	207	207	207	207	376	207	207
LHGSVPNLSR|S4: Phospho	129	gi|22035616|ref|NP_665741.1|	1	oxysterol-binding protein-like protein 7 [Homo sapiens]	108566	108566	1	29	LHGSVPNLSR	S4: Phospho	S272: Phospho	488.592	3	1462.76	-0.004938	29.42	1	269	278	R	Y	0	2012-08-10-Look-iTRAQ-pST-15-70.2868.2868.3.dta - 488.59150|793|812|1718|522|1523|2587|1483|2068	1156	['OSBPL7']	S272: Phospho	FALSE	['NA']	FALSE	0	HCD	Yes	Yes	Yes	25.21	4.21	1	29.42	793	812	1718	522	1523	2587	1483	2068	793	812	1718
ASEPLLSPPPFGESR|S7: Phospho	52	gi|148762969|ref|NP_003473.3|	1	myeloid/lymphoid or mixed-lineage leukemia 2 [Homo sapiens]	667412	667412	2	47	ASEPLLSPPPFGESR	S7: Phospho	S2274: Phospho	656.664	3	1966.97	0.000413	47.08	1	2268	2282	K	K	0	2012-08-10-Look-iTRAQ-pST-13-230.5044.5044.3.dta - 656.66470|215|215|365|215|484|561|362|440	1718	['MLL2']	S2274: Phospho	FALSE	['NA']	FALSE	0	HCD	Yes	Yes	Yes	29.29	17.79	3	47.08	215	215	365	215	484	561	362	440	215	215	365
SGGLQTPECLSR|T6: Phospho; S11: Phospho	189	gi|82546824|ref|NP_001032242.1|	1	forkhead box K1 [Homo sapiens]	82255	82255	3	16	SGGLQTPECLSR	T6: Phospho; S11: Phospho	T436: Phospho; S441: Phospho	884.885	2	1767.76	-0.002002	15.96	1	431	442	R	E	0	2012-08-10-Look-iTRAQ-pST-0-700.3283.3283.2.dta - 884.88480|626|2019|3079|1231|1276|2488|798|628	1926	['FOXK1']	T436: Phospho; S441: Phospho				0.0074813	CID	Yes	Yes	Yes	15.58	0.38	3	53.14	1044	3258	5232	2295	1946	3875	1216	1900	626	2019	3079
NQGGYGGSSSSSSYGSGR|S16: Phospho	6	gi|4504445|ref|NP_002127.1|; gi|14043070|ref|NP_112420.1|	2	heterogeneous nuclear ribonucleoprotein A1 isoform a [Homo sapiens]; heterogeneous nuclear ribonucleoprotein A1 isoform b [Homo sapiens]	40069; 44617	40069	2	86	NQGGYGGSSSSSSYGSGR	S16: Phospho	S316: Phospho	693.627	3	2077.86	-0.0065	70.05	1	301	318	R	R	0	2012-08-10-Look-iTRAQ-pST-9-700.1813.1813.3.dta - 693.62690|1084|1943|2257|2541|1248|2245|861|1617	1598	['HNRNPA1']	S316: Phospho	FALSE	['NA']	FALSE	0	HCD	Yes	Yes	Yes	46.45	23.6	2	70.05	1289	2148	2462	3592	1826	3582	1066	1982	1084	1943	2257
AVSTVVVTTAPSPK|S12: Phospho	131	gi|23346420|ref|NP_006156.2|; gi|219802034|ref|NP_001137307.1|	2	nuclear factor related to kappaB binding protein isoform 2 [Homo sapiens]; nuclear factor related to kappaB binding protein isoform 1 [Homo sapiens]	167535; 164621	167535	1	25	AVSTVVVTTAPSPK	S12: Phospho	S1316: Phospho	682.384	3	2044.14	-0.011785	24.91	1	1305	1318	K	Q	0	2012-08-10-Look-iTRAQ-pST-15-230.2839.2839.3.dta - 682.38410|204|787|788|410|769|804|441|711	1471	['NFRKB']	S1316: Phospho	FALSE	['NA']	FALSE	0	HCD	No	N/A	N/A	N/A	N/A	1	24.91	204	787	788	410	769	804	441	711	204	787	788
NQNYLVPSPVLR|S8: Phospho	227	gi|7705935|ref|NP_057415.1|	1	zinc finger protein 639 [Homo sapiens]	67901	67901	1	14	NQNYLVPSPVLR	S8: Phospho	S88: Phospho	595.321	3	1782.93	0.007743	15.19	1	81	92	R	I	0	2012-08-10-Look-iTRAQ-pST-15-70.4698.4698.3.dta - 595.32090|438|655|435|221|652|525|664|1786	1595	['ZNF639']	S88: Phospho	FALSE	['NA']	FALSE	0.00243309	HCD	No	N/A	N/A	N/A	N/A	1	15.19	438	655	435	221	652	525	664	1786	438	655	435
RDSSDDWEIPDGQITVGQR|S3: Phospho	4	gi|33188459|ref|NP_004324.2|	1	B-Raf [Homo sapiens]	97902	97902	1	62	RDSSDDWEIPDGQITVGQR	S3: Phospho	S446: Phospho	853.397	3	2557.18	-0.006556	61.6	1	444	462	R	I	1	2012-08-10-Look-iTRAQ-pST-22p5-230.2910.2910.3.dta - 853.39790|505|577|528|714|459|1099|458|844	847	['BRAF']	S446: Phospho	TRUE	['sp|P15056|BRAF_HUMAN Serine/threonine-protein kinase B-raf OS=Homo sapiens GN=BRAF PE=1 SV=4', 'tr|E2I6F4|E2I6F4_HUMAN Serine/threonine-protein kinase B-raf variant (Fragment) OS=Homo sapiens GN=BRAF PE=2 SV=1']	FALSE	0	HCD	No	N/A	N/A	N/A	N/A	2	66.05	505	577	528	714	459	1099	458	844	505	577	528
LTPVRPAAASPIVSGAR|S10: Phospho	101	gi|16306580|ref|NP_036440.1|	1	F-box and leucine-rich repeat protein 11 [Homo sapiens]	157062	157062	1	23	LTPVRPAAASPIVSGAR	S10: Phospho	S558: Phospho	683.052	3	2046.13	0.004493	22.89	1	549	565	R	R	0	2012-08-10-Look-iTRAQ-pST-15-70.3343.3343.3.dta - 683.04850|1055|1805|3405|979|1298|2462|932|883	1900	['KDM2A']	S558: Phospho	FALSE	['NA']	FALSE	0	CID	Yes	Yes	Yes	13.4	9.49	2	22.89	1513	3066	5631	2204	2296	3817	1786	1860	1055	1805	3405
SGLFPR|S1: Phospho	151	gi|156086724|ref|NP_055900.4|; gi|156086740|ref|NP_001093868.1|	2	RAP1 GTPase activating protein 2 isoform 1 [Homo sapiens]; RAP1 GTPase activating protein 2 isoform 2 [Homo sapiens]	96034; 93142	96034	3	25	SGLFPR	S1: Phospho	S564: Phospho	530.778	2	1059.54	-0.001356	25.47	1	564	569	R	L	0	2012-08-10-Look-iTRAQ-pST-15-70.3810.3810.2.dta - 530.77750|2416|3578|2792|8272|4325|11734|4233|5590	401	['RAP1GAP2']	S564: Phospho	FALSE	['NA']	FALSE	0	HCD	No	N/A	N/A	N/A	N/A	3	25.47	7644	9982	8610	22407	12099	29646	10570	13919	2416	3578	2792
KAQAVSEEEEEEEGK|S6: Phospho	7	gi|9966805|ref|NP_065147.1|	1	DEAD (Asp-Glu-Ala-Asp) box polypeptide 24 [Homo sapiens]	126711	126711	1	58	KAQAVSEEEEEEEGK	S6: Phospho	S82: Phospho	671.838	4	2683.34	-0.011853	57.58	1	77	91	R	S	1	2012-08-10-Look-iTRAQ-pST-22p5-700.2456.2456.4.dta - 671.83870|518|407|839|717|1308|745|729|467	867	['DDX24']	S82: Phospho	FALSE	['NA']	FALSE	0	HCD	Yes	Yes	Yes	28.7	28.88	1	57.58	518	407	839	717	1308	745	729	467	518	407	839
LGSTGAK|S3: Phospho	167	gi|4506791|ref|NP_002962.1|; gi|196114999|ref|NP_001124482.1|	2	special AT-rich sequence binding protein 1 [Homo sapiens]	99935	99935	1	22	LGSTGAK	S3: Phospho	S47: Phospho	441.248	3	1320.73	-0.005497	22.2	1	45	51	R	M	0	2012-08-10-Look-iTRAQ-pST-11-230.2314.2314.3.dta - 441.24790|1311|960|1783|2108|986|1333|450|1055	979	['SATB1']	S47: Phospho	FALSE	['NA']	FALSE	0.00706714	HCD	No	N/A	N/A	N/A	N/A	1	22.2	1311	960	1783	2108	986	1333	450	1055	1311	960	1783
ELSNSPLRENSFGSPLEFR|S3: Phospho; S5: Phospho	52	gi|118572613|ref|NP_057417.3|	1	splicing coactivator subunit SRm300 [Homo sapiens]	340030	340030	1	20	ELSNSPLRENSFGSPLEFR	S3: Phospho; S5: Phospho	S1318: Phospho; S1320: Phospho	881.743	3	2642.21	-0.001369	20.1	1	1316	1334	K	N	1	2012-08-10-Look-iTRAQ-pST-15-700.3692.3692.3.dta - 881.74190|843|314|864|1264|1557|924|319|1245	814	['SRRM2']	S1318: Phospho; S1320: Phospho	FALSE	['NA']	FALSE	0	HCD	No	N/A	N/A	N/A	N/A	1	20.1	843	314	864	1264	1557	924	319	1245	843	314	864
SGQGFHGNSEVNAILSPR|S16: Phospho	26	gi|13491168|ref|NP_056132.1|	1	pumilio homolog 2 [Homo sapiens]	126367	126367	1	56	SGQGFHGNSEVNAILSPR	S16: Phospho	S82: Phospho	752.031	3	2253.08	-0.013063	56.06	1	67	84	R	S	0	2012-08-10-Look-iTRAQ-pST-15-230.3230.3230.3.dta - 752.03050|212|516|638|423|441|736|309|411	1641	['PUM2']	S82: Phospho	FALSE	['NA']	FALSE	0	HCD	Yes	Yes	Yes	18.46	37.6	1	56.06	212	516	638	423	441	736	309	411	212	516	638
ALDVSASDDEIAR|S5: Phospho	132	gi|23510451|ref|NP_001631.3|	1	N-acylaminoacyl-peptide hydrolase [Homo sapiens]	90964	90964	1	25	ALDVSASDDEIAR	S5: Phospho	S185: Phospho	873.416	2	1744.82	-0.002167	25.21	1	181	193	K	L	0	2012-08-10-Look-iTRAQ-pST-0-700.4617.4617.2.dta - 873.41500|1415|1951|2117|2230|1835|1889|957|2054	1870	['APEH']	S185: Phospho				0	CID	Yes	Yes	S7: Phospho	15.11	10.1	1	25.21	1415	1951	2117	2230	1835	1889	957	2054	1415	1951	2117
RFSLSPSLGPQASR|S3: Phospho; S5: Phospho	77	gi|7706139|ref|NP_057689.1|; gi|208431810|ref|NP_001129119.1|	2	hypothetical protein LOC51307 [Homo sapiens]	48065	48065	1	41	RFSLSPSLGPQASR	S3: Phospho; S5: Phospho	S232: Phospho; S234: Phospho	656.32	3	1965.94	0.000212	40.89	1	230	243	R	F	1	2012-08-10-Look-iTRAQ-pST-15-230.3311.3311.3.dta - 656.31960|467|683|553|681|411|803|212|1465	1379	['FAM53C']	S232: Phospho; S234: Phospho	FALSE	['NA']	FALSE	0	HCD	No	N/A	N/A	N/A	N/A	1	40.89	467	683	553	681	411	803	212	1465	467	683	553
SASSGAEGDVSSEREP|S3: Phospho	53	gi|30795227|ref|NP_543010.3|	1	D-tyrosyl-tRNA deacylase 1 [Homo sapiens]	29664	29664	1	41	SASSGAEGDVSSEREP	S3: Phospho	S196: Phospho	974.927	2	1947.84	0.002515	41.09	1	194	209	R	-	1	2012-08-10-Look-iTRAQ-pST-0-700.2564.2564.2.dta - 974.92680|513|210|682|470|350|347|210|210	2435	['DTD1']	S196: Phospho				0	CID	No	N/A	N/A	N/A	N/A	1	41.09	513	210	682	470	350	347	210	210	513	210	682
SREAGSCR|S1: Phospho	177	gi|21687188|ref|NP_660313.1|	1	hypothetical protein LOC146325 [Homo sapiens]	66389	66389	1	18	SREAGSCR	S1: Phospho	S2: Phospho	653.793	2	1305.58	-0.008874	17.81	1	2	9	M	V	1	2012-08-10-Look-iTRAQ-pST-13-230.4012.4012.2.dta - 653.79260|1945|2555|1546|3068|2420|3166|1619|5079	692	['C16orf11']	S2: Phospho	FALSE	['NA']	FALSE	0	HCD	No	N/A	N/A	N/A	N/A	1	17.81	1945	2555	1546	3068	2420	3166	1619	5079	1945	2555	1546
TASPPPPPK|S3: Phospho	2	gi|42542379|ref|NP_005830.2|	1	serine/arginine repetitive matrix 1 [Homo sapiens]	133664	133664	24	217	TASPPPPPK	S3: Phospho	S616: Phospho	527.292	3	1578.86	-0.010233	15.13	1	614	622	R	R	0	2012-08-10-Look-iTRAQ-pST-11-230.2247.2247.3.dta - 527.29200|692|1276|1715|1309|1331|1770|746|1181	1470	['SRRM1']	S616: Phospho	FALSE	['NA']	FALSE	0.00977995	HCD	No	N/A	N/A	N/A	N/A	1	15.13	692	1276	1715	1309	1331	1770	746	1181	692	1276	1715
RLSELALGTGAQG|S3: Phospho	141	gi|205360947|ref|NP_073602.3|; gi|226530313|ref|NP_001152763.1|	2	microtubule associated monoxygenase, calponin and LIM domain containing 1 isoform 1 [Homo sapiens]; microtubule associated monoxygenase, calponin and LIM domain containing 1 isoform 2 [Homo sapiens]	133486; 123200	133486	2	16	RLSELALGTGAQG	S3: Phospho	S1057: Phospho	552.961	3	1655.86	0.005666	16.3	1	1055	1067	R	-	1	2012-08-10-Look-iTRAQ-pST-15-230.3620.3620.3.dta - 552.95940|210|1014|210|210|210|362|210|2436	848	['MICAL1']	S1057: Phospho	FALSE	['NA']	FALSE	0.00934579	CID	Yes	Yes	Yes	15.81	0.49	1	16.3	210	1014	210	210	210	362	210	2436	210	1014	210
RGFSDSGGGPPAK|S4: Phospho	56	gi|33356174|ref|NP_002678.2|	1	pinin, desmosome associated protein [Homo sapiens]	100236	100236	7	42	RGFSDSGGGPPAK	S4: Phospho	S66: Phospho	640.996	3	1919.97	-0.004771	22.99	1	63	75	R	Q	1	2012-08-10-Look-iTRAQ-pST-11-230.2555.2555.3.dta - 640.99670|914|948|386|1473|624|216|376|1127	2191	['PNN']	S66: Phospho	FALSE	['NA']	FALSE	0.00740741	HCD	No	N/A	N/A	N/A	N/A	2	22.99	1797	1611	600	2378	838	430	590	1541	914	948	386
LEEPPELNRQSPNPR|S11: Phospho	112	gi|116734704|ref|NP_892017.2|; gi|116734706|ref|NP_001070865.1|	2	interferon regulatory factor 2 binding protein 2 isoform A [Homo sapiens]; interferon regulatory factor 2 binding protein 2 isoform B [Homo sapiens]	69333; 67486	69333	4	20	LEEPPELNRQSPNPR	S11: Phospho	S175: Phospho	720.695	3	2159.07	-0.005689	20.19	1	165	179	K	R	1	2012-08-10-Look-iTRAQ-pST-11-230.4009.4009.3.dta - 720.69520|1189|559|2978|1731|2018|2846|570|1270	2521	['IRF2BP2']	S175: Phospho	FALSE	['NA']	FALSE	0.0052356	CID	Yes	Yes	Yes	14.47	5.72	2	20.19	1995	1220	4899	2714	3694	4899	1217	2856	1189	559	2978
LALAGEGEACPLLGSPGAGR|S15: Phospho	32	gi|23238208|ref|NP_055154.3|	1	interleukin 17A receptor precursor [Homo sapiens]	104179	104179	1	42	LALAGEGEACPLLGSPGAGR	S15: Phospho	S708: Phospho	760.715	3	2279.13	-0.005642	42.18	1	694	713	R	N	0	2012-08-10-Look-iTRAQ-pST-17p5-230.3828.3828.3.dta - 760.71550|214|299|283|214|214|214|214|214	1007	['IL17RA']	S708: Phospho	FALSE	['NA']	FALSE	0	CID	Yes	Yes	Yes	28.64	13.54	1	42.18	214	299	283	214	214	214	214	214	214	299	283
SAGEEEDGPVLTDEQK|S1: Phospho	35	gi|50409691|ref|NP_001002252.1|; gi|50409707|ref|NP_057722.2|; gi|50409738|ref|NP_001002251.1|; gi|50409756|ref|NP_061164.2|	4	SRp25 nuclear protein isoform 4 [Homo sapiens]; SRp25 nuclear protein isoform 2 [Homo sapiens]; SRp25 nuclear protein isoform 3 [Homo sapiens]; SRp25 nuclear protein isoform 1 [Homo sapiens]	47064; 47465; 48795; 49609	47064	2	45	SAGEEEDGPVLTDEQK	S1: Phospho	S252: Phospho	798.049	3	2391.13	-0.006144	34.98	1	252	267	R	S	0	2012-08-10-Look-iTRAQ-pST-11-700.2743.2743.3.dta - 798.04880|208|208|208|543|489|398|364|208	1387	['ARL6IP4']	S252: Phospho	FALSE	['NA']	FALSE	0	HCD	Yes	Yes	Yes	26.39	8.59	1	34.98	208	208	208	543	489	398	364	208	208	208	208
TLTPPLRR|T3: Phospho	83	gi|116008442|ref|NP_055885.3|; rev_gi|12711674|ref|NP_075386.1|; rev_gi|18375528|ref|NP_542199.1|	3	zinc finger CCCH-type containing 13 [Homo sapiens]; UPF3 regulator of nonsense transcripts homolog B isoform 2 [Homo sapiens]; UPF3 regulator of nonsense transcripts homolog B isoform 1 [Homo sapiens]	222881; 79109; 80961	222881	3	38	TLTPPLRR	T3: Phospho	T364: Phospho	446.59	3	1336.75	-0.004362	13.54	1	362	369	R	S	1	2012-08-10-Look-iTRAQ-pST-13-230.2728.2728.3.dta - 446.59080|490|600|976|543|1211|532|444|786	738	['ZC3H13', 'NA']	T364: Phospho	FALSE	['NA']	NA	0.00280112	HCD	No	N/A	N/A	N/A	N/A	1	13.54	490	600	976	543	1211	532	444	786	490	600	976
AASDDGSLK|S3: Phospho	179	gi|28416946|ref|NP_510880.2|; gi|42794779|ref|NP_976063.1|	2	myosin 18A isoform a [Homo sapiens]; myosin 18A isoform b [Homo sapiens]	282233; 279142	282233	1	27	AASDDGSLK	S3: Phospho	S1998: Phospho	517.932	3	1550.78	-0.004886	27.22	1	1996	2004	K	S	0	2012-08-10-Look-iTRAQ-pST-0-700.2557.2557.3.dta - 517.93240|849|972|1651|1565|712|1172|469|589	1399	['MYO18A']	S1998: Phospho				0	HCD	No	N/A	N/A	N/A	N/A	1	27.22	849	972	1651	1565	712	1172	469	589	849	972	1651
RLSLPGLLSQVSPR|S3: Phospho; S12: Phospho	10	gi|40316935|ref|NP_065970.2|	1	alsin isoform 1 [Homo sapiens]	212417	212417	1	56	RLSLPGLLSQVSPR	S3: Phospho; S12: Phospho	S483: Phospho; S492: Phospho	663.019	3	1986.04	-0.001862	55.81	1	481	494	R	L	1	2012-08-10-Look-iTRAQ-pST-20-70.4055.4055.3.dta - 663.01870|215|215|260|215|215|592|493|215	989	['ALS2']	S483: Phospho; S492: Phospho	FALSE	['NA']	FALSE	0	HCD	No	N/A	N/A	N/A	N/A	1	55.81	215	215	260	215	215	592	493	215	215	215	260
GSPHYFSPFRPY|S2: Phospho	44	gi|4506903|ref|NP_003760.1|	1	splicing factor, arginine/serine-rich 9 [Homo sapiens]	28378	28378	4	29	GSPHYFSPFRPY	S2: Phospho	S211: Phospho	613.624	3	1837.85	6.8e-05	29.6	1	210	221	R	-	0	2012-08-10-Look-iTRAQ-pST-20-230.3403.3403.3.dta - 613.62550|1283|1043|1965|1113|2168|1396|1557|205	580	['SRSF9']	S211: Phospho	FALSE	['NA']	FALSE	0	HCD	No	N/A	N/A	N/A	N/A	19	31.08	8042	11024	19311	13225	14444	13993	12084	5692	1283	1043	1965
ALPSLNTGSSSPR|S11: Phospho	42	gi|5729828|ref|NP_006691.1|; gi|219879806|ref|NP_001137378.1|	2	TRAF-type zinc finger domain containing 1 [Homo sapiens]	73222	73222	3	41	ALPSLNTGSSSPR	S11: Phospho	S327: Phospho	835.926	2	1669.83	0.002458	21.87	1	317	329	R	G	0	2012-08-10-Look-iTRAQ-pST-15-70.3320.3320.2.dta - 835.92150|874|1586|420|1162|1134|1031|1694|1653	1435	['TRAFD1']	S327: Phospho	FALSE	['NA']	FALSE	0	CID	No	N/A	N/A	N/A	N/A	3	40.64	1482	2444	944	1905	1831	1919	2664	2692	874	1586	420
RASMQPIQIAEGTGITTR|S3: Phospho; M4: Oxidation	8	gi|71361682|ref|NP_006176.2|	1	nuclear mitotic apparatus protein 1 [Homo sapiens]	285438	285438	3	75	RASMQPIQIAEGTGITTR	S3: Phospho; M4: Oxidation	S1969: Phospho; M1970: Oxidation	777.397	3	2329.18	-0.006551	38.4	1	1967	1984	R	Q	1	2012-08-10-Look-iTRAQ-pST-17p5-70.3204.3204.3.dta - 777.39740|373|212|212|212|212|212|212|212	1616	['NUMA1']	S1969: Phospho	FALSE	['NA']	FALSE	0	CID	Yes	Yes	Yes	32.54	5.86	3	38.4	584	423	423	565	423	423	423	423	373	212	212
FGGNPGGFGNQGGFGNSR|S17: Phospho	39	gi|6678271|ref|NP_031401.1|	1	TAR DNA binding protein [Homo sapiens]	51442	51442	2	39	FGGNPGGFGNQGGFGNSR	S17: Phospho	S292: Phospho	1055.97	2	2109.93	0.000673	20.01	1	276	293	R	G	0	2012-08-10-Look-iTRAQ-pST-17p5-70.3623.3623.2.dta - 1055.97350|283|628|475|1071|1173|1068|203|1114	1542	['TARDBP']	S292: Phospho	FALSE	['NA']	FALSE	0.00641026	CID	No	N/A	N/A	N/A	N/A	2	80.48	707	1466	935	2212	1784	1482	761	1739	283	628	475
YGRPPDSHHSR|S10: Phospho	85	gi|47271443|ref|NP_003007.2|	1	splicing factor, arginine/serine-rich 2 [Homo sapiens]	29416	29416	2	36	YGRPPDSHHSR	S10: Phospho	S101: Phospho	423.952	4	1691.78	-0.003704	23.34	1	92	102	R	R	0	2012-08-10-Look-iTRAQ-pST-9-230.1305.1305.4.dta - 423.95240|1012|1220|1037|3191|1900|3355|933|1751	1896	['SRSF2']	S101: Phospho				0	HCD	No	N/A	N/A	N/A	N/A	5	23.34	1632	1840	1944	4409	2520	4966	1828	2371	1012	1220	1037
KGDVEGSQSQDEGEGSGESER|S9: Phospho	30	gi|4885399|ref|NP_005436.1|	1	structural maintenance of chromosomes 3 [Homo sapiens]	180487	180487	1	49	KGDVEGSQSQDEGEGSGESER	S9: Phospho	S1067: Phospho	714.574	4	2854.27	-0.003834	49.49	1	1059	1079	K	G	1	2012-08-10-Look-iTRAQ-pST-11-700.1971.1971.4.dta - 714.57430|342|206|206|206|206|206|206|340	1622	['SMC3']	S1067: Phospho	FALSE	['NA']	FALSE	0	HCD	Yes	Yes	Yes	17.86	31.63	1	49.49	342	206	206	206	206	206	206	340	342	206	206
SGSDRNSAILSDPSVFSPLNK|S7: Phospho	107	gi|56550039|ref|NP_005924.2|	1	myeloid/lymphoid or mixed-lineage leukemia protein [Homo sapiens]	529449	529449	1	23	SGSDRNSAILSDPSVFSPLNK	S7: Phospho	S187: Phospho	720.624	4	2878.47	-0.001168	23.37	1	181	201	R	S	1	2012-08-10-Look-iTRAQ-pST-17p5-230.3698.3698.4.dta - 720.62490|213|354|455|213|213|598|465|213	1206	['MLL']	S187: Phospho	FALSE	['NA']	FALSE	0	HCD	No	N/A	N/A	N/A	N/A	1	23.37	213	354	455	213	213	598	465	213	213	354	455
AHTPLNTPDPSTK|T3: Phospho	87	gi|197313748|ref|NP_054878.5|	1	SET domain containing 2 [Homo sapiens]	354019	354019	2	36	AHTPLNTPDPSTK	T3: Phospho	T1853: Phospho	689.693	3	2066.07	-0.009675	23.31	1	1851	1863	R	L	0	2012-08-10-Look-iTRAQ-pST-11-230.2589.2589.3.dta - 689.69320|716|358|1320|596|1280|909|465|821	2412	['SETD2']	T1853: Phospho	FALSE	['NA']	FALSE	0.00763359	HCD	No	N/A	N/A	N/A	N/A	1	23.31	716	358	1320	596	1280	909	465	821	716	358	1320
SVSGSPEPAAK|S5: Phospho	1	gi|42542379|ref|NP_005830.2|	1	serine/arginine repetitive matrix 1 [Homo sapiens]	133664	133664	37	238	SVSGSPEPAAK	S5: Phospho	S756: Phospho	859.447	2	1716.89	-0.010421	34.96	1	752	762	R	K	0	2012-08-10-Look-iTRAQ-pST-9-230.2500.2500.2.dta - 859.44780|207|1367|8230|207|643|677|207|207	1923	['SRRM1']	S756: Phospho				0	CID	Yes	Yes	S3: Phospho	14.6	20.36	2	34.96	413	1895	12202	418	849	883	413	413	207	1367	8230
RLSSTSLASGHSVR|S3: Phospho; S12: Phospho	39	gi|19923468|ref|NP_057541.2|; gi|120659782|ref|NP_001073349.1|; gi|120659785|ref|NP_001073350.1|; gi|120659787|ref|NP_001073351.1|	4	protein kinase D2 isoform A [Homo sapiens]; protein kinase D2 isoform B [Homo sapiens]	110445; 92403	110445	3	52	RLSSTSLASGHSVR	S3: Phospho; S12: Phospho	S197: Phospho; S206: Phospho	481.235	4	1920.91	-0.001732	19.02	1	195	208	R	L	1	2012-08-10-Look-iTRAQ-pST-15-230.2201.2201.4.dta - 481.23530|810|1095|800|901|1161|848|432|1185	1333	['PRKD2']	S197: Phospho; S206: Phospho	TRUE	['sp|Q9BZL6|KPCD2_HUMAN Serine/threonine-protein kinase D2 OS=Homo sapiens GN=PRKD2 PE=1 SV=2']	TRUE	0	HCD	No	N/A	N/A	N/A	N/A	2	51.73	1570	1630	1369	2162	2234	1599	1191	2489	810	1095	800
YFEADPPGQVAASPDPTT|T17: Phospho	14	gi|5454002|ref|NP_006434.1|	1	putative c-Myc-responsive isoform 1 [Homo sapiens]	19819	19819	4	55	YFEADPPGQVAASPDPTT	T17: Phospho	T173: Phospho	749.675	3	2246.01	-0.005061	21.28	1	157	174	R	-	0	2012-08-10-Look-iTRAQ-pST-11-700.3813.3813.3.dta - 749.67460|209|209|326|209|209|353|209|209	1318	['C6orf108']	T173: Phospho	FALSE	['NA']	FALSE	0.00675676	CID	No	N/A	N/A	N/A	N/A	1	21.28	209	209	326	209	209	353	209	209	209	209	326
RRSPSPYYSR|S3: Phospho; S5: Phospho	97	gi|4759098|ref|NP_004584.1|; gi|9558733|ref|NP_037425.1|	2	splicing factor, arginine/serine-rich 10 [Homo sapiens]; transformer-2 alpha [Homo sapiens]	36193; 34856	36193	3	34	RRSPSPYYSR	S3: Phospho; S5: Phospho	S264: Phospho; S266: Phospho	578.267	3	1731.78	-0.002044	14.49	1	262	271	R	G	2	2012-08-10-Look-iTRAQ-pST-15-230.1426.1426.3.dta - 578.26700|1099|632|1140|210|210|210|210|783	956	['TRA2B', 'TRA2A']	S264: Phospho; S266: Phospho	FALSE	['NA']	FALSE	0	HCD	No	N/A	N/A	N/A	N/A	1	14.49	1099	632	1140	210	210	210	210	783	1099	632	1140
VGSLTPPSSPK|T5: Phospho; S9: Phospho	66	gi|148277037|ref|NP_055726.3|	1	AP2 associated kinase 1 [Homo sapiens]	119468	119468	1	31	VGSLTPPSSPK	T5: Phospho; S9: Phospho	T620: Phospho; S624: Phospho	613.314	3	1836.92	-0.004964	30.61	1	616	626	K	T	0	2012-08-10-Look-iTRAQ-pST-11-700.2816.2816.3.dta - 613.31400|332|1479|1912|731|2358|1073|988|932	909	['AAK1']	T620: Phospho; S624: Phospho	TRUE	['sp|Q2M2I8|AAK1_HUMAN AP2-associated protein kinase 1 OS=Homo sapiens GN=AAK1 PE=1 SV=3']	TRUE	0	HCD	No	N/A	N/A	N/A	N/A	1	30.61	332	1479	1912	731	2358	1073	988	932	332	1479	1912
SSPQLDPLR|S2: Phospho	165	gi|166197710|ref|NP_056393.2|; gi|166197712|ref|NP_001107565.1|	2	LSM14 homolog A isoform b [Homo sapiens]; LSM14 homolog A isoform a [Homo sapiens]	58356; 58028	58356	2	23	SSPQLDPLR	S2: Phospho	S183: Phospho	698.858	2	1395.71	-0.005185	17.33	1	182	190	R	K	0	2012-08-10-Look-iTRAQ-pST-11-230.4162.4162.2.dta - 698.85850|1476|2704|4115|3024|4851|5518|4054|1882	1059	['LSM14A']	S183: Phospho	FALSE	['NA']	FALSE	0.00821918	HCD	No	N/A	N/A	N/A	N/A	2	22.99	2132	4413	6217	4619	7445	7795	6158	2974	1476	2704	4115
VTSSVPLPSGSTSSPGR|S14: Phospho	108	gi|7661890|ref|NP_055563.1|	1	sorting nexin 17 [Homo sapiens]	60454	60454	1	34	VTSSVPLPSGSTSSPGR	S14: Phospho	S336: Phospho	667.34	3	1998.99	0.004891	33.57	1	323	339	R	G	0	2012-08-10-Look-iTRAQ-pST-15-70.3296.3296.3.dta - 667.33660|554|785|1025|683|846|1212|629|918	1848	['SNX17']	S336: Phospho	FALSE	['NA']	FALSE	0	HCD	Yes	Yes	Yes	29.1	4.47	1	33.57	554	785	1025	683	846	1212	629	918	554	785	1025
SQSEEEEEVFGIPR|S3: Phospho	39	gi|222418791|ref|NP_001138430.1|	1	EF-hand calcium binding domain 4B isoform a [Homo sapiens]	100063	100063	1	66	SQSEEEEEVFGIPR	S3: Phospho	S426: Phospho	673.978	3	2018.91	-0.003045	65.74	1	424	437	R	R	0	2012-08-10-Look-iTRAQ-pST-0-700.6022.6022.3.dta - 673.97770|213|213|334|344|389|320|213|213	2544	['EFCAB4B']	S426: Phospho				0	HCD	Yes	Yes	Yes	43.96	21.78	1	65.74	213	213	334	344	389	320	213	213	213	213	334
TEAPGTPEGPEPERPSPGDGNPR|T6: Phospho	200	gi|123701900|ref|NP_006589.2|	1	solute carrier family 12 (potassium/chloride transporters), member 7 [Homo sapiens]	133060	133060	1	13	TEAPGTPEGPEPERPSPGDGNPR	T6: Phospho	T30: Phospho	682.819	4	2727.24	0.000576	13.33	1	25	47	R	E	0	2012-08-10-Look-iTRAQ-pST-9-700.2458.2458.4.dta - 682.81880|202|202|202|369|202|390|202|202	2029	['SLC12A7']	T30: Phospho	FALSE	['NA']	FALSE	0	HCD	No	N/A	N/A	N/A	N/A	1	13.33	202	202	202	369	202	390	202	202	202	202	202
SESLIDASEDSQLEAAIR|S8: Phospho	7	gi|149944496|ref|NP_056377.1|	1	UBX domain containing 7 [Homo sapiens]	63441	63441	1	73	SESLIDASEDSQLEAAIR	S8: Phospho	S285: Phospho	773.373	3	2317.1	-0.001726	73.04	1	278	295	R	A	0	2012-08-10-Look-iTRAQ-pST-11-700.4438.4438.3.dta - 773.37370|198|198|285|198|198|313|198|198	1359	['UBXN7']	S285: Phospho	FALSE	['NA']	FALSE	0	HCD	Yes	Yes	S1: Phospho	39.44	33.6	1	73.04	198	198	285	198	198	313	198	198	198	198	285
LNVLEKSSPGHR|S8: Phospho	124	gi|25453472|ref|NP_001951.2|; gi|194239723|ref|NP_001123525.1|; gi|194239725|ref|NP_001123526.1|; gi|194239727|ref|NP_001123527.1|; gi|194239729|ref|NP_001123528.1|; gi|194239731|ref|NP_001123529.1|; gi|25453474|ref|NP_115754.2|	7	eukaryotic translation elongation factor 1 delta isoform 2 [Homo sapiens]; eukaryotic translation elongation factor 1 delta isoform 1 [Homo sapiens]; eukaryotic translation elongation factor 1 delta isoform 3 [Homo sapiens]; eukaryotic translation elongation factor 1 delta isoform 4 [Homo sapiens]; eukaryotic translation elongation factor 1 delta isoform 1 [Homo sapiens]	37605; 83684; 83846; 34739; 83684	37605	2	17	LNVLEKSSPGHR	S8: Phospho	S119: Phospho	507.032	4	2024.1	-0.003065	16.94	1	112	123	R	A	1	2012-08-10-Look-iTRAQ-pST-17p5-230.2578.2578.4.dta - 507.03370|845|205|472|760|703|1054|1104|685	871	['EEF1D', 'unresolved: gi|194239723|ref|NP_001123525.1|', 'unresolved: gi|194239725|ref|NP_001123526.1|', 'unresolved: gi|25453474|ref|NP_115754.2|']	S119: Phospho	FALSE	['NA']	FALSE	0	HCD	No	N/A	N/A	N/A	N/A	2	16.94	1058	621	685	1158	1243	1775	1515	1174	845	205	472
ISQTSLPVPGPGSGPQR|T4: Phospho	94	gi|55743134|ref|NP_001006666.1|	1	ribosomal protein S6 kinase, 90kDa, polypeptide 1 isoform b [Homo sapiens]	102227	102227	1	37	ISQTSLPVPGPGSGPQR	T4: Phospho	T30: Phospho	688.026	3	2061.06	-0.001152	37.07	1	27	43	R	D	0	2012-08-10-Look-iTRAQ-pST-15-70.4127.4127.3.dta - 688.02560|211|211|211|211|211|478|211|457	1908	['RPS6KA1']	T30: Phospho	FALSE	['NA']	FALSE	0	HCD	Yes	Yes	S5: Phospho	24.08	12.99	1	37.07	211	211	211	211	211	478	211	457	211	211	211
LEQNGSPLGR|S6: Phospho	79	gi|4506791|ref|NP_002962.1|; gi|196114999|ref|NP_001124482.1|	2	special AT-rich sequence binding protein 1 [Homo sapiens]	99935	99935	3	38	LEQNGSPLGR	S6: Phospho	S38: Phospho	727.868	2	1453.72	-0.002534	35.46	1	33	42	R	G	0	2012-08-10-Look-iTRAQ-pST-9-230.3782.3782.2.dta - 727.86790|2244|2196|4595|5973|1884|1619|860|627	1402	['SATB1']	S38: Phospho				0	HCD	No	N/A	N/A	N/A	N/A	3	37.62	5114	5946	10392	13478	4181	3770	2231	1760	2244	2196	4595
TTSISPALAR|S5: Phospho	118	gi|55741807|ref|NP_055843.1|; gi|239735580|ref|NP_001155032.1|; gi|239735582|ref|NP_001155033.1|; gi|239735584|ref|NP_001155034.1|; gi|239735586|ref|NP_001155035.1|; gi|239735588|ref|NP_001155036.1|; gi|239735590|ref|NP_001155037.1|; gi|239735592|ref|NP_001155038.1|	8	TRAF2 and NCK interacting kinase isoform 1 [Homo sapiens]; TRAF2 and NCK interacting kinase isoform 2 [Homo sapiens]; TRAF2 and NCK interacting kinase isoform 3 [Homo sapiens]; TRAF2 and NCK interacting kinase isoform 4 [Homo sapiens]; TRAF2 and NCK interacting kinase isoform 5 [Homo sapiens]; TRAF2 and NCK interacting kinase isoform 6 [Homo sapiens]; TRAF2 and NCK interacting kinase isoform 7 [H…	181218; 179675; 177577; 176034; 174804; 173261; 171163; 169620	181218	1	30	TTSISPALAR	S5: Phospho	S680: Phospho	700.872	2	1399.74	-0.009361	31.09	1	676	685	R	K	0	2012-08-10-Look-iTRAQ-pST-13-230.2857.2857.2.dta - 700.87230|1199|945|1659|2175|2799|6073|3845|1453	827	['TNIK']	S680: Phospho	TRUE	['sp|Q9UKE5|TNIK_HUMAN TRAF2 and NCK-interacting protein kinase OS=Homo sapiens GN=TNIK PE=1 SV=1']	TRUE	0	HCD	No	N/A	N/A	N/A	N/A	1	31.09	1199	945	1659	2175	2799	6073	3845	1453	1199	945	1659
AYLQSITPQGYSDSEER|S12: Phospho	56	gi|7662184|ref|NP_055610.1|	1	zinc finger homeobox 1b [Homo sapiens]	167656	167656	1	24	AYLQSITPQGYSDSEER	S12: Phospho	S1122: Phospho	776.692	3	2327.06	-0.007128	26.14	1	1111	1127	R	E	0	2012-08-10-Look-iTRAQ-pST-20-230.2841.2841.3.dta - 776.69400|213|213|418|213|213|780|213|213	766	['ZEB2']	S1122: Phospho	FALSE	['NA']	FALSE	0	CID	Yes	Yes	S5: Phospho	19.29	6.85	2	34.29	422	422	627	496	422	989	523	422	213	213	418
YGMGTSVER|S6: Phospho	84	gi|4505685|ref|NP_000275.1|	1	pyruvate dehydrogenase E1 alpha 1 precursor [Homo sapiens]	51253	51253	3	36	YGMGTSVER	S6: Phospho	S232: Phospho	692.316	2	1382.62	-0.003436	14.98	1	227	235	R	A	0	2012-08-10-Look-iTRAQ-pST-9-230.3564.3564.2.dta - 692.31620|2661|6004|6315|5437|2159|4725|2018|3066	1247	['PDHA1']	S232: Phospho				0.00892857	HCD	No	N/A	N/A	N/A	N/A	2	36.82	3151	7496	7667	6563	3001	6081	2227	3850	2661	6004	6315
AQCETLSPDGLPEEQPQTTK|S7: Phospho	136	gi|61676188|ref|NP_113584.3|	1	HECT, UBA and WWE domain containing 1 [Homo sapiens]	543931	543931	1	18	AQCETLSPDGLPEEQPQTTK	S7: Phospho	S3662: Phospho	730.108	4	2916.4	-0.001836	22.15	1	3656	3675	R	L	0	2012-08-10-Look-iTRAQ-pST-9-700.3515.3515.4.dta - 730.10750|212|212|212|212|212|362|334|212	2107	['HUWE1']	S3662: Phospho	FALSE	['NA']	FALSE	0	CID	Yes	Yes	Yes	20.93	1.22	1	22.15	212	212	212	212	212	362	334	212	212	212	212
YGSIVDDER|S3: Phospho	54	gi|116089337|ref|NP_006624.2|	1	IQ motif containing GTPase activating protein 2 [Homo sapiens]	221496	221496	1	47	YGSIVDDER	S3: Phospho	S16: Phospho	719.331	2	1436.65	-0.002476	47.68	1	14	22	R	L	0	2012-08-10-Look-iTRAQ-pST-9-230.4424.4424.2.dta - 719.33100|7186|12374|3469|5900|1716|9368|9138|6283	1360	['IQGAP2']	S16: Phospho				0	HCD	Yes	Yes	Yes	21.19	26.49	5	47.68	16213	24037	9051	14225	4167	23147	21619	14875	7186	12374	3469
ALSHQEPMVSTQPAPR|S3: Phospho; M8: Oxidation	5	gi|130502162|ref|NP_075055.1|	1	RAS protein activator like 3 [Homo sapiens]	121867	121867	4	85	ALSHQEPMVSTQPAPR	S3: Phospho; M8: Oxidation	S51: Phospho; M56: Oxidation	717.017	3	2148.03	-0.004782	46.79	1	49	64	R	S	0	2012-08-10-Look-iTRAQ-pST-11-230.2832.2832.3.dta - 717.01760|209|209|209|435|209|457|209|209	2480	['RASAL3']	S51: Phospho	FALSE	['NA']	FALSE	0	HCD	Yes	Yes	Yes	24.24	22.55	1	46.79	209	209	209	435	209	457	209	209	209	209	209
THSEGSLLQEPR|S3: Phospho	96	gi|10864075|ref|NP_066929.1|; gi|114155127|ref|NP_652759.3|; gi|62865651|ref|NP_570613.2|	3	regulator of G-protein signalling 3 isoform 2 [Homo sapiens]; regulator of G-protein signalling 3 isoform 6 [Homo sapiens]; regulator of G-protein signalling 3 isoform 1 [Homo sapiens]	69248; 157558; 121836	69248	1	34	THSEGSLLQEPR	S3: Phospho	S264: Phospho	579.951	3	1736.84	-0.009531	33.9	1	262	273	R	G	0	2012-08-10-Look-iTRAQ-pST-9-230.3819.3819.3.dta - 579.95100|606|617|725|328|888|1185|1275|1287	1983	['RGS3']	S264: Phospho				0	HCD	No	N/A	N/A	N/A	N/A	1	33.9	606	617	725	328	888	1185	1275	1287	606	617	725
TLTDEVNSPDSDRR|S8: Phospho; S11: Phospho	16	gi|21237805|ref|NP_003066.2|; gi|194363725|ref|NP_001123892.1|; gi|21237808|ref|NP_620706.1|	3	SWI/SNF-related matrix-associated actin-dependent regulator of chromatin c2 isoform a [Homo sapiens]; SWI/SNF-related matrix-associated actin-dependent regulator of chromatin c2 isoform c [Homo sapiens]; SWI/SNF-related matrix-associated actin-dependent regulator of chromatin c2 isoform b [Homo sapiens]	161487; 157057; 154975	161487	11	91	TLTDEVNSPDSDRR	S8: Phospho; S11: Phospho	S283: Phospho; S286: Phospho	690.303	3	2067.88	0.004182	25.71	1	276	289	K	D	1	2012-08-10-Look-iTRAQ-pST-0-700.3155.3155.3.dta - 690.30260|203|370|632|460|367|861|203|387	2684	['SMARCC2']	S283: Phospho; S286: Phospho				0	HCD	No	N/A	N/A	N/A	N/A	1	25.71	203	370	632	460	367	861	203	387	203	370	632
SRGSTNLFSK|S4: Phospho	208	gi|46852166|ref|NP_002367.4|; gi|193083125|ref|NP_001122390.1|; gi|193083127|ref|NP_001122391.1|; gi|193083129|ref|NP_001122392.1|; gi|193083131|ref|NP_001122393.1|	5	MAP/microtubule affinity-regulating kinase 3 isoform c [Homo sapiens]; MAP/microtubule affinity-regulating kinase 3 isoform a [Homo sapiens]; MAP/microtubule affinity-regulating kinase 3 isoform b [Homo sapiens]; MAP/microtubule affinity-regulating kinase 3 isoform d [Homo sapiens]; MAP/microtubule affinity-regulating kinase 3 isoform e [Homo sapiens]	98085; 101376; 99893; 96218; 89467	98085	1	16	SRGSTNLFSK	S4: Phospho	S601: Phospho	595.654	3	1783.94	-0.002993	16.15	1	598	607	R	L	1	2012-08-10-Look-iTRAQ-pST-15-70.2901.2901.3.dta - 595.65340|2426|2885|2280|3717|2863|5388|3611|3245	1596	['MARK3']	S601: Phospho	TRUE	['sp|P27448|MARK3_HUMAN MAP/microtubule affinity-regulating kinase 3 OS=Homo sapiens GN=MARK3 PE=1 SV=4']	TRUE	0.00257732	HCD	No	N/A	N/A	N/A	N/A	1	16.15	2426	2885	2280	3717	2863	5388	3611	3245	2426	2885	2280
RASMQPIQIAEGTGITTR|S3: Phospho	8	gi|71361682|ref|NP_006176.2|	1	nuclear mitotic apparatus protein 1 [Homo sapiens]	285438	285438	6	74	RASMQPIQIAEGTGITTR	S3: Phospho	S1969: Phospho	772.067	3	2313.18	-0.004032	56.49	1	1967	1984	R	Q	1	2012-08-10-Look-iTRAQ-pST-15-70.4415.4415.3.dta - 772.06650|718|625|923|738|685|539|1026|218	2009	['NUMA1']	S1969: Phospho	FALSE	['NA']	FALSE	0	CID	Yes	Yes	Yes	53.45	3.04	2	57.95	923	934	1128	943	890	744	1231	423	718	625	923
VPSVAEAPQLRPAGTAAAK|S3: Phospho	163	gi|209969812|ref|NP_001129663.1|; gi|258613875|ref|NP_056308.3|	2	ankyrin repeat domain 25 isoform 2 [Homo sapiens]; ankyrin repeat domain 25 isoform 1 [Homo sapiens]	100434; 101180	100434	1	24	VPSVAEAPQLRPAGTAAAK	S3: Phospho	S540: Phospho	631.354	4	2521.39	-0.000687	24.14	1	538	556	R	T	0	2012-08-10-Look-iTRAQ-pST-15-70.3772.3772.4.dta - 631.35390|855|614|1008|475|345|907|588|567	2096	['KANK2']	S540: Phospho	FALSE	['NA']	FALSE	0.00361011	HCD	No	N/A	N/A	N/A	N/A	1	24.14	855	614	1008	475	345	907	588	567	855	614	1008
SSGSPYGGGYGSGGGSGGYGSR|S4: Phospho	19	gi|34740329|ref|NP_919223.1|	1	heterogeneous nuclear ribonucleoprotein A3 [Homo sapiens]	46491	46491	2	47	SSGSPYGGGYGSGGGSGGYGSR	S4: Phospho	S358: Phospho	1147.98	2	2293.95	1e-06	34.61	1	355	376	R	R	0	2012-08-10-Look-iTRAQ-pST-15-230.2048.2048.2.dta - 1147.98550|1363|850|2024|1222|201|1363|791|336	1654	['HNRNPA3']	S358: Phospho	FALSE	['NA']	FALSE	0	CID	No	N/A	N/A	N/A	N/A	20	104.84	5303	6520	10761	7269	3496	10067	4370	3466	1363	850	2024
TASLPGYGR|S3: Phospho	183	gi|51173711|ref|NP_002304.3|; gi|51173713|ref|NP_001003407.1|; gi|51173715|ref|NP_001003408.1|; gi|51173717|ref|NP_006711.3|	4	actin-binding LIM protein 1 isoform a [Homo sapiens]; actin-binding LIM protein 1 isoform b [Homo sapiens]; actin-binding LIM protein 1 isoform c [Homo sapiens]; actin-binding LIM protein 1 isoform s [Homo sapiens]	105636; 97267; 100821; 60294	105636	1	20	TASLPGYGR	S3: Phospho	S655: Phospho	653.326	2	1304.64	-0.005782	20.29	1	653	661	K	N	0	2012-08-10-Look-iTRAQ-pST-11-230.3324.3324.2.dta - 653.32650|1329|3449|367|2561|1079|3500|5333|4247	928	['ABLIM1']	S655: Phospho	FALSE	['NA']	FALSE	0.00647249	HCD	No	N/A	N/A	N/A	N/A	1	20.29	1329	3449	367	2561	1079	3500	5333	4247	1329	3449	367
SLSEQPVMDTATATEQAK|S3: Phospho; M8: Oxidation	179	gi|14670268|ref|NP_002895.3|	1	RD RNA-binding protein [Homo sapiens]	52150	52150	1	8	SLSEQPVMDTATATEQAK	S3: Phospho; M8: Oxidation	S51: Phospho; M56: Oxidation	871.096	3	2610.27	-0.004808	8.19	1	49	66	R	Q	0	2012-08-10-Look-iTRAQ-pST-11-700.2936.2936.3.dta - 871.09610|203|203|203|203|203|580|203|203	1488	['RDBP']	S51: Phospho	FALSE	['NA']	FALSE	0.00352113	HCD	No	N/A	N/A	N/A	N/A	2	27.65	403	403	704	403	403	780	403	403	203	203	203
DSSDSADGRATPSENLVPSSAR|T11: Phospho	128	gi|209862881|ref|NP_001129512.1|; gi|217035102|ref|NP_079087.3|; gi|217035107|ref|NP_001136037.1|	3	pre-mRNA cleavage factor I, 59 kDa subunit isoform 2 [Homo sapiens]; pre-mRNA cleavage factor I, 59 kDa subunit isoform 1 [Homo sapiens]; pre-mRNA cleavage factor I, 59 kDa subunit isoform 3 [Homo sapiens]	57361; 61683; 56350	57361	1	19	DSSDSADGRATPSENLVPSSAR	T11: Phospho	T203: Phospho	868.398	3	2602.18	-0.010666	18.71	1	193	214	R	V	1	2012-08-10-Look-iTRAQ-pST-9-700.2845.2845.3.dta - 868.39790|211|572|569|211|429|211|425|211	1942	['CPSF7']	T203: Phospho	FALSE	['NA']	FALSE	0.00546448	CID	Yes	Yes	Yes	16.47	2.24	1	18.71	211	572	569	211	429	211	425	211	211	572	569
LGSLSER|S3: Phospho	177	gi|255958282|ref|NP_005808.3|; gi|255958289|ref|NP_001157661.1|; gi|255958306|ref|NP_001157666.1|	3	mannose 6 phosphate receptor binding protein 1 isoform 1 [Homo sapiens]; mannose 6 phosphate receptor binding protein 1 isoform 2 [Homo sapiens]; mannose 6 phosphate receptor binding protein 1 isoform 3 [Homo sapiens]	54822; 54694; 52943	54822	2	20	LGSLSER	S3: Phospho	S241: Phospho	573.293	2	1144.58	-0.008527	16.62	1	239	245	R	L	0	2012-08-10-Look-iTRAQ-pST-9-230.3949.3949.2.dta - 573.29300|2255|3318|2748|4472|11154|4898|2329|27489	650	['PLIN3']	S241: Phospho				0.00731707	HCD	No	N/A	N/A	N/A	N/A	2	19.5	3637	5633	3551	6892	18107	8454	3078	50157	2255	3318	2748
LTVENSPK|S6: Phospho	214	gi|27501446|ref|NP_003668.2|	1	density-regulated protein [Homo sapiens]	30082	30082	1	17	LTVENSPK	S6: Phospho	S73: Phospho	525.958	3	1574.85	-0.001155	16.63	1	68	75	K	Q	0	2012-08-10-Look-iTRAQ-pST-11-230.3057.3057.3.dta - 525.95830|958|1042|1661|1392|1706|1732|988|1144	1458	['DENR']	S73: Phospho	FALSE	['NA']	FALSE	0.0078329	HCD	No	N/A	N/A	N/A	N/A	1	16.63	958	1042	1661	1392	1706	1732	988	1144	958	1042	1661
SSVGWDATEDLR|S1: Phospho	58	gi|7661882|ref|NP_055697.1|; gi|261399907|ref|NP_001007232.2|; gi|261399909|ref|NP_001159748.1|; gi|261399911|ref|NP_001159749.1|	4	Rho GTPase activating protein 25 isoform b [Homo sapiens]; Rho GTPase activating protein 25 isoform a [Homo sapiens]; Rho GTPase activating protein 25 isoform c [Homo sapiens]; Rho GTPase activating protein 25 isoform d [Homo sapiens]	87861; 89792; 87932; 84944	87861	4	45	SSVGWDATEDLR	S1: Phospho	S371: Phospho	860.398	2	1718.78	-0.000409	22.34	1	371	382	R	I	0	2012-08-10-Look-iTRAQ-pST-9-700.4417.4417.2.dta - 860.39840|3628|1515|210|6176|1300|3246|9573|1336	970	['ARHGAP25']	S371: Phospho	FALSE	['NA']	FALSE	0	HCD	Yes	Yes	Yes	21.94	0.4	2	38.7	4142	1867	641	6926	1946	3956	10788	1552	3628	1515	210
KPSEEEYVIR|S3: Phospho	76	gi|22027525|ref|NP_004831.1|	1	Rac/Cdc42 guanine nucleotide exchange factor 6 [Homo sapiens]	105733	105733	2	29	KPSEEEYVIR	S3: Phospho	S640: Phospho	646.676	3	1937.01	-0.006722	17.17	1	638	647	R	K	0	2012-08-10-Look-iTRAQ-pST-11-700.2833.2833.3.dta - 646.67580|895|1351|1861|1518|687|2420|1418|330	1049	['ARHGEF6']	S640: Phospho	FALSE	['NA']	FALSE	0	HCD	No	N/A	N/A	N/A	N/A	2	30.05	1353	2309	2929	2832	897	3252	2149	540	895	1351	1861
KESAQPPAHL|S3: Phospho	157	gi|4826665|ref|NP_005116.1|	1	copper chaperone for superoxide dismutase [Homo sapiens]	31969	31969	1	22	KESAQPPAHL	S3: Phospho	S267: Phospho	589.318	3	1764.94	-0.007325	21.64	1	265	274	R	-	1	2012-08-10-Look-iTRAQ-pST-9-700.2642.2642.3.dta - 589.31790|1236|1118|392|1237|418|1386|1854|947	1038	['CCS']	S267: Phospho	FALSE	['NA']	FALSE	0	HCD	No	N/A	N/A	N/A	N/A	1	21.64	1236	1118	392	1237	418	1386	1854	947	1236	1118	392
AAVLSDSEDEEKASAK|S5: Phospho; S7: Phospho	86	gi|217330641|ref|NP_060439.2|	1	IWS1 homolog [Homo sapiens]	113555	113555	1	27	AAVLSDSEDEEKASAK	S5: Phospho; S7: Phospho	S398: Phospho; S400: Phospho	681.336	4	2721.33	-0.01217	27.79	1	394	409	K	K	1	2012-08-10-Look-iTRAQ-pST-11-700.4035.4035.4.dta - 681.33620|209|209|725|725|937|546|209|209	1561	['IWS1']	S398: Phospho; S400: Phospho	FALSE	['NA']	FALSE	0	HCD	No	N/A	N/A	N/A	N/A	1	27.79	209	209	725	725	937	546	209	209	209	209	725
SPSFASEWDEIEK|S3: Phospho	28	gi|140161500|ref|NP_056060.2|	1	ankyrin repeat and sterile alpha motif domain containing 1 [Homo sapiens]	144383	144383	1	48	SPSFASEWDEIEK	S3: Phospho	S663: Phospho	738.359	3	2212.06	0.000779	47.93	1	661	673	K	I	0	2012-08-10-Look-iTRAQ-pST-13-700.4230.4230.3.dta - 738.35870|555|622|2094|1695|1643|1504|1237|212	1116	['ANKS1A']	S663: Phospho	FALSE	['NA']	FALSE	0	HCD	Yes	Yes	Yes	27.76	20.17	1	47.93	555	622	2094	1695	1643	1504	1237	212	555	622	2094
NEAASPGSGGGGGGLGPGAHGYGPSPIDLWLDAPR|S5: Phospho	27	gi|182765442|ref|NP_061824.3|	1	homeobox A10 isoform a [Homo sapiens]	48985	48985	1	34	NEAASPGSGGGGGGLGPGAHGYGPSPIDLWLDAPR	S5: Phospho	S93: Phospho	907.932	4	3627.71	-0.007112	35.23	1	89	123	R	S	0	2012-08-10-Look-iTRAQ-pST-20-700.4319.4319.4.dta - 907.93400|215|215|358|215|397|215|215|215	940	['HOXA10']	S93: Phospho	FALSE	['NA']	FALSE	0	HCD	Yes	Yes	Yes	32.37	2.86	3	64.7	215	215	358	215	397	215	215	215	215	215	358
TSQTQPTATSPLTSYR|S10: Phospho	5	gi|130502162|ref|NP_075055.1|	1	RAS protein activator like 3 [Homo sapiens]	121867	121867	4	85	TSQTQPTATSPLTSYR	S10: Phospho	S18: Phospho	708.348	3	2122.03	-0.001472	38.47	1	9	24	R	W	0	2012-08-10-Look-iTRAQ-pST-11-230.3659.3659.3.dta - 708.34900|210|347|441|380|567|593|414|313	2459	['RASAL3']	S18: Phospho	FALSE	['NA']	FALSE	0	HCD	Yes	Yes	Yes	31.21	7.26	1	38.47	210	347	441	380	567	593	414	313	210	347	441
YPNVFGIGDCTNLPTSK|S16: Phospho	3	gi|10864011|ref|NP_067022.1|	1	sulfide dehydrogenase like precursor [Homo sapiens]	60861	60861	2	78	YPNVFGIGDCTNLPTSK	S16: Phospho	S343: Phospho	857.762	3	2570.27	-0.005865	28.43	1	328	344	R	T	0	2012-08-10-Look-iTRAQ-pST-20-230.3544.3544.3.dta - 857.76310|1687|946|912|2059|1477|1132|2365|604	822	['SQRDL']	S343: Phospho	FALSE	['NA']	FALSE	0	HCD	Yes	Yes	Yes	26.42	2.01	1	28.43	1687	946	912	2059	1477	1132	2365	604	1687	946	912
SSPVTK|S1: Phospho	1	gi|42542379|ref|NP_005830.2|	1	serine/arginine repetitive matrix 1 [Homo sapiens]	133664	133664	15	215	SSPVTK	S1: Phospho	S645: Phospho	436.242	3	1305.72	-0.011553	9.04	1	645	650	R	R	0	2012-08-10-Look-iTRAQ-pST-9-700.1759.1759.3.dta - 436.24210|2701|3617|6832|4785|4138|5582|2773|2280	477	['SRRM1']	S645: Phospho	FALSE	['NA']	FALSE	0.0028169	HCD	No	N/A	N/A	N/A	N/A	1	9.04	2701	3617	6832	4785	4138	5582	2773	2280	2701	3617	6832
PNPSSTSSPYPLPEEIR|S7: Phospho	122	gi|16753212|ref|NP_003921.2|	1	src kinase associated phosphoprotein 2 [Homo sapiens]	51458	51458	1	27	PNPSSTSSPYPLPEEIR	S7: Phospho	S8: Phospho	752.367	3	2254.08	-0.002252	27.41	1	2	18	M	N	0	2012-08-10-Look-iTRAQ-pST-15-230.3663.3663.3.dta - 752.36540|208|577|376|441|208|602|208|413	1642	['SKAP2']	S8: Phospho	FALSE	['NA']	FALSE	0	HCD	No	N/A	N/A	N/A	N/A	2	27.41	208	577	376	441	208	602	208	413	208	577	376
QLSLPLTQSK|S3: Phospho	120	gi|94721263|ref|NP_001035536.1|	1	myotubularin related protein 12 [Homo sapiens]	105429	105429	1	27	QLSLPLTQSK	S3: Phospho	S564: Phospho	601.676	3	1802.02	-0.009901	27.37	1	562	571	R	S	0	2012-08-10-Look-iTRAQ-pST-15-230.3526.3526.3.dta - 601.67570|206|206|206|377|206|719|375|206	1084	['MTMR12']	S564: Phospho	FALSE	['NA']	FALSE	0	HCD	No	N/A	N/A	N/A	N/A	1	27.37	206	206	206	377	206	719	375	206	206	206	206
GILAADESTGSIAK|S11: Phospho	39	sp|ALDOA_RABIT|; gi|193794814|ref|NP_001121089.1|; gi|34577110|ref|NP_908930.1|; gi|34577112|ref|NP_908932.1|; gi|4557305|ref|NP_000025.1|	5	Marto_Lab (cRAP); fructose-bisphosphate aldolase A [Homo sapiens]; fructose-bisphosphate aldolase A [Homo sapiens]; fructose-bisphosphate aldolase A [Homo sapiens]; fructose-bisphosphate aldolase A [Homo sapiens]	47503; 48065; 48065; 48065; 48065	47503	2	40	GILAADESTGSIAK	S11: Phospho	S39: Phospho	674.362	3	2020.07	-0.00527	40.26	1	29	42	K	R	0	2012-08-10-Look-iTRAQ-pST-13-700.3069.3069.3.dta - 674.36200|352|359|550|389|663|623|419|508	917	['NA', 'ALDOA']	S39: Phospho	FALSE	['NA']	FALSE	0	HCD	No	N/A	N/A	N/A	N/A	1	40.26	352	359	550	389	663	623	419	508	352	359	550
TQPDGTSVPGEPASPISQR|S14: Phospho	42	gi|71361682|ref|NP_006176.2|	1	nuclear mitotic apparatus protein 1 [Homo sapiens]	285438	285438	3	37	TQPDGTSVPGEPASPISQR	S14: Phospho	S1757: Phospho	1154.56	2	2307.11	-0.001024	32.19	1	1744	1762	R	L	0	2012-08-10-Look-iTRAQ-pST-9-230.3895.3895.2.dta - 1154.55970|207|207|685|460|463|329|207|207	2748	['NUMA1']	S1757: Phospho				0	CID	No	N/A	N/A	N/A	N/A	5	41.29	417	417	895	670	812	824	417	417	207	207	685
[truncated: 1,847 more rows]
[truncated: 30 more columns]

## Sheet: iTRAQ channel designation
Sample ID	Response	iTRAQ channel
60376	Remission	113
60436	Remission	114
56415	Induction failure	115
60438	Induction failure	116
60455	Remission	117
57878	Remission	118
59630	Induction failure	119
63972	Induction failure	121
